# Supplementary material
Source: PubMed Central journal article supplement (PMC3955059)

# The following pages contain the listed calculations for all patients at each point in box and scatter plots

| short name                                | function name | solid model applicator | body   | balloon & rectal contrast | packing contrast |
|-------------------------------------------|---------------|------------------------|--------|---------------------------|------------------|
| balloon & rectal, packing = Bone          | D(Y, N, B, B) | Y                      | None   | Bone                      | Bone             |
| balloon & rectal = Bone                   | D(Y, N, B, N) | Y                      | None   | Bone                      | None             |
| balloon & rectal = Bone, packing = Muscle | D(Y, N, B, M) | Y                      | None   | Bone                      | Muscle           |
| noApp, CT                                 | D(N, N, N, N) | N                      | None   | None                      | None             |
| CT                                        | D(Y, N, N, N) | Y                      | None   | None                      | None             |
| balloon & rectal, packing = Muscle        | D(Y, N, M, M) | Y                      | None   | Muscle                    | Muscle           |
| body = Muscle                             | D(Y, M, X, X) | Y                      | Muscle | NA                        | NA               |
| noApp, body = Muscle                      | D(N, M, X, X) | N                      | Muscle | NA                        | NA               |

D(solid model applicator, body, balloon & rectal contrast, packing contrast)

N = None

Y = Yes

X = not applicable

M = 1 g/cc Muscle

B = 2.25 g/cc Bone

 all patients

 rectal contrast was overridden

 no rectal contrast, so entire rectum was overridden

GBBS(solid model applicator, body, balloon & rectal contrast, packing contrast)

### A left

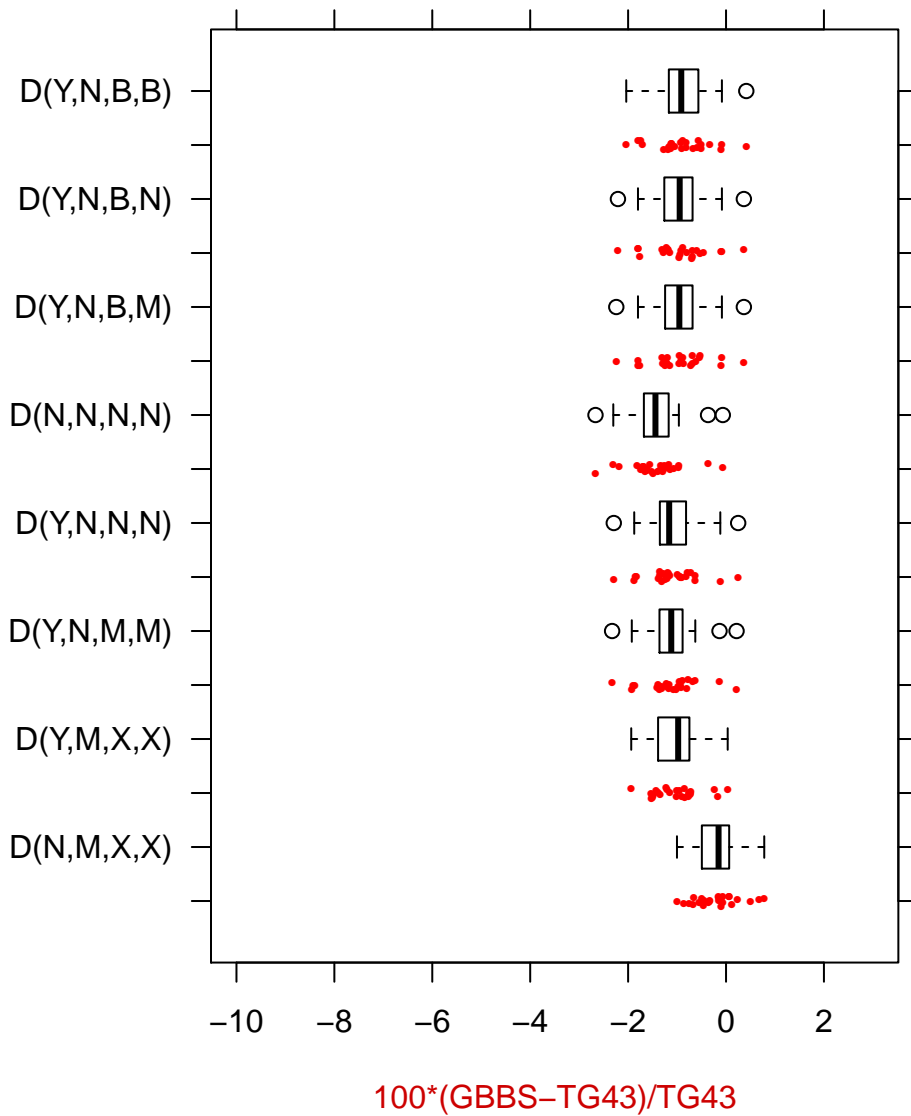

GBBS(solid model applicator, body, balloon & rectal contrast, packing contrast)

### A left

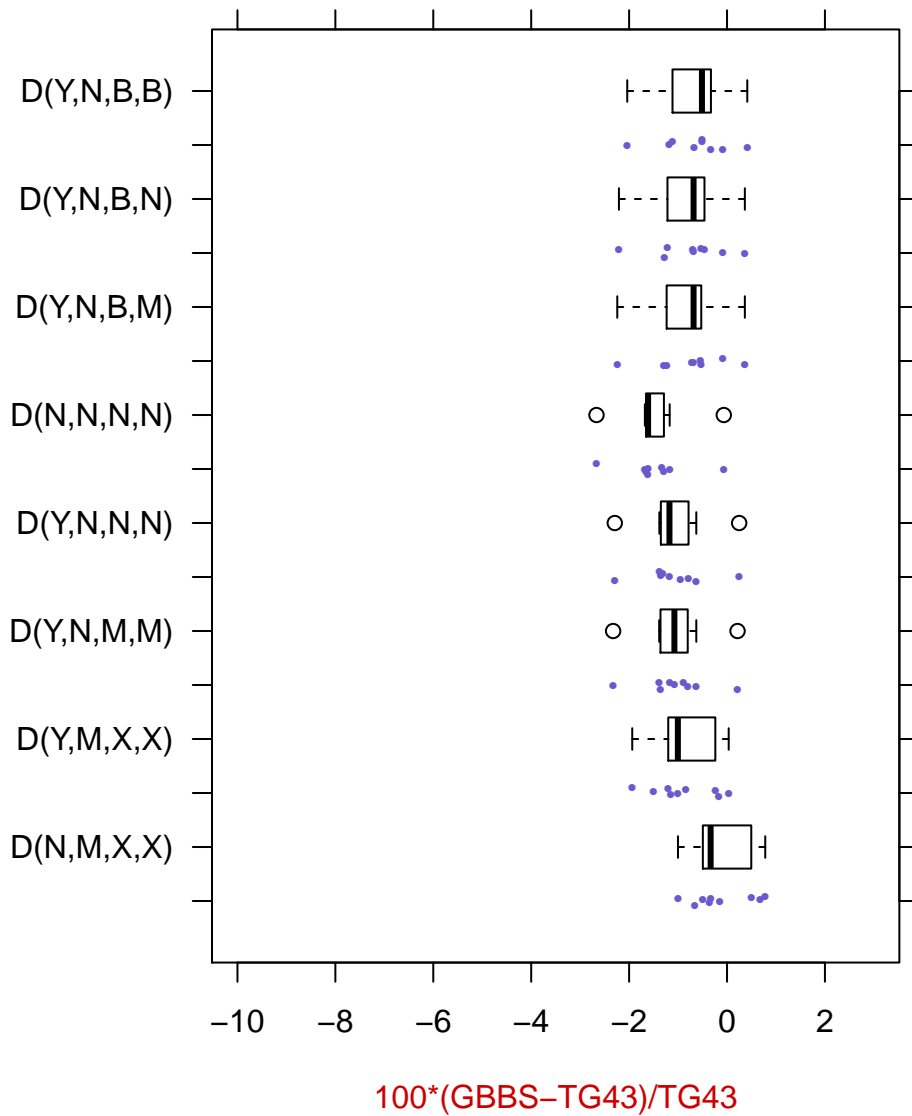

GBBS(solid model applicator, body, balloon & rectal contrast, packing contrast)

A left

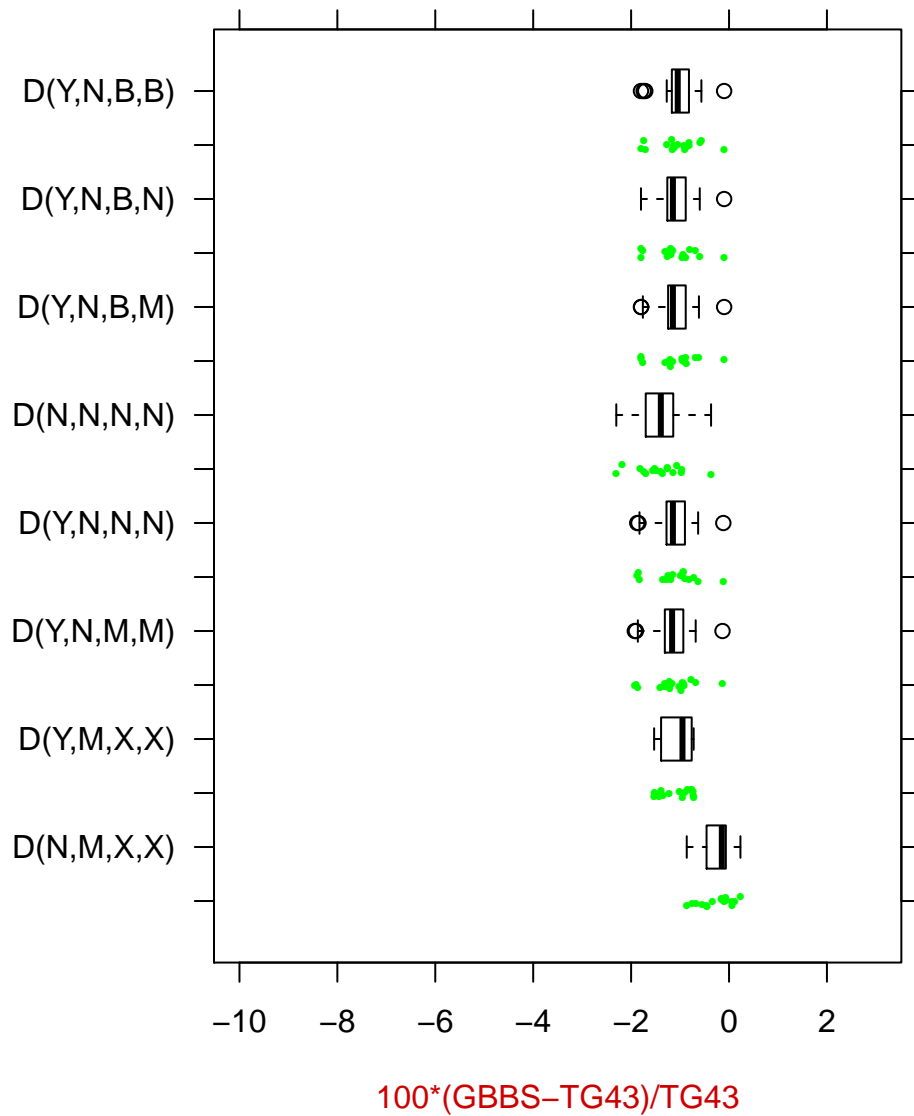

GBBS(solid model applicator, body, balloon & rectal contrast, packing contrast)

### A left

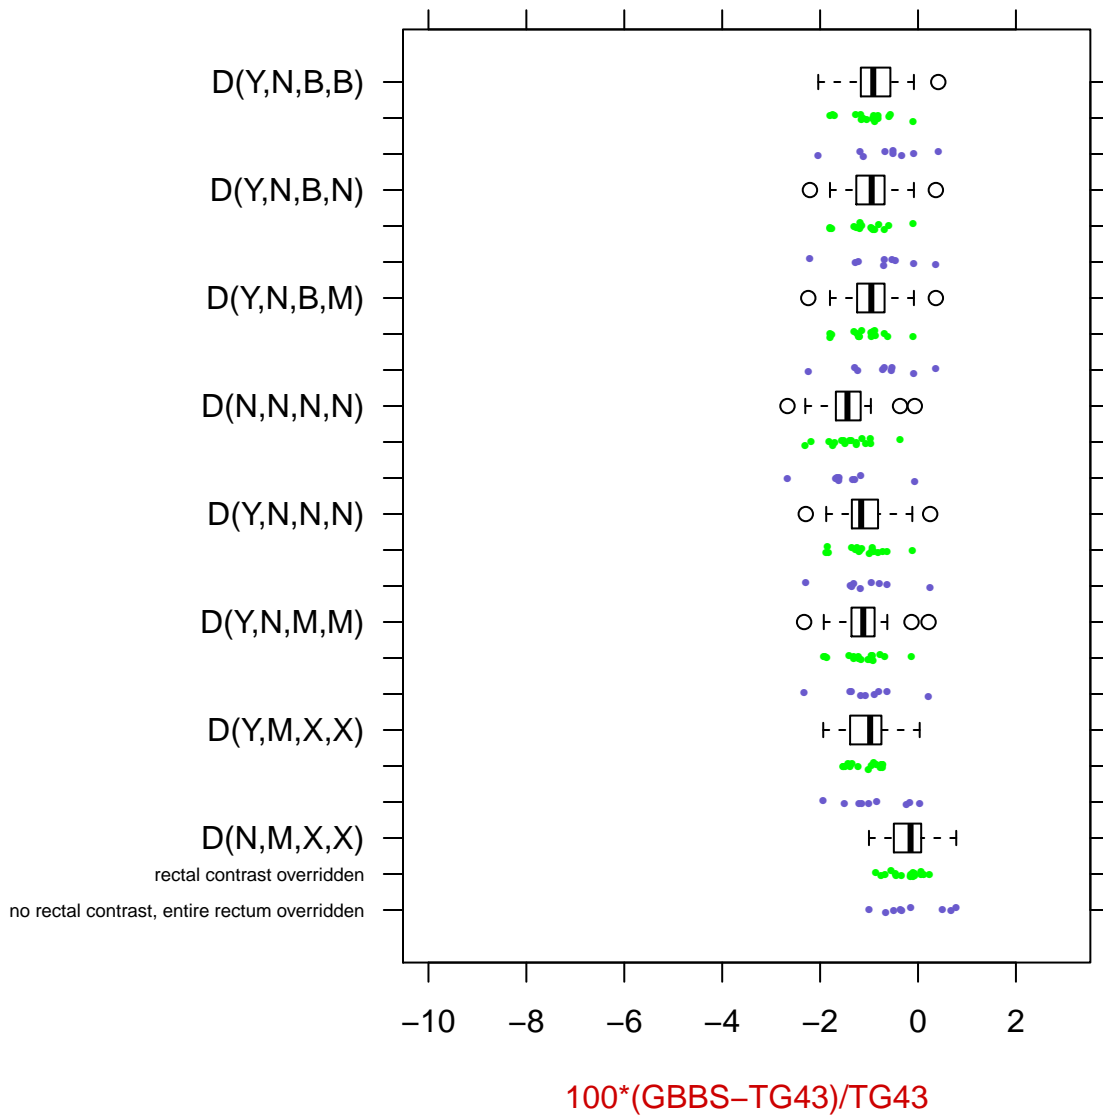

GBBS(solid model applicator, body, balloon & rectal contrast, packing contrast)

A right

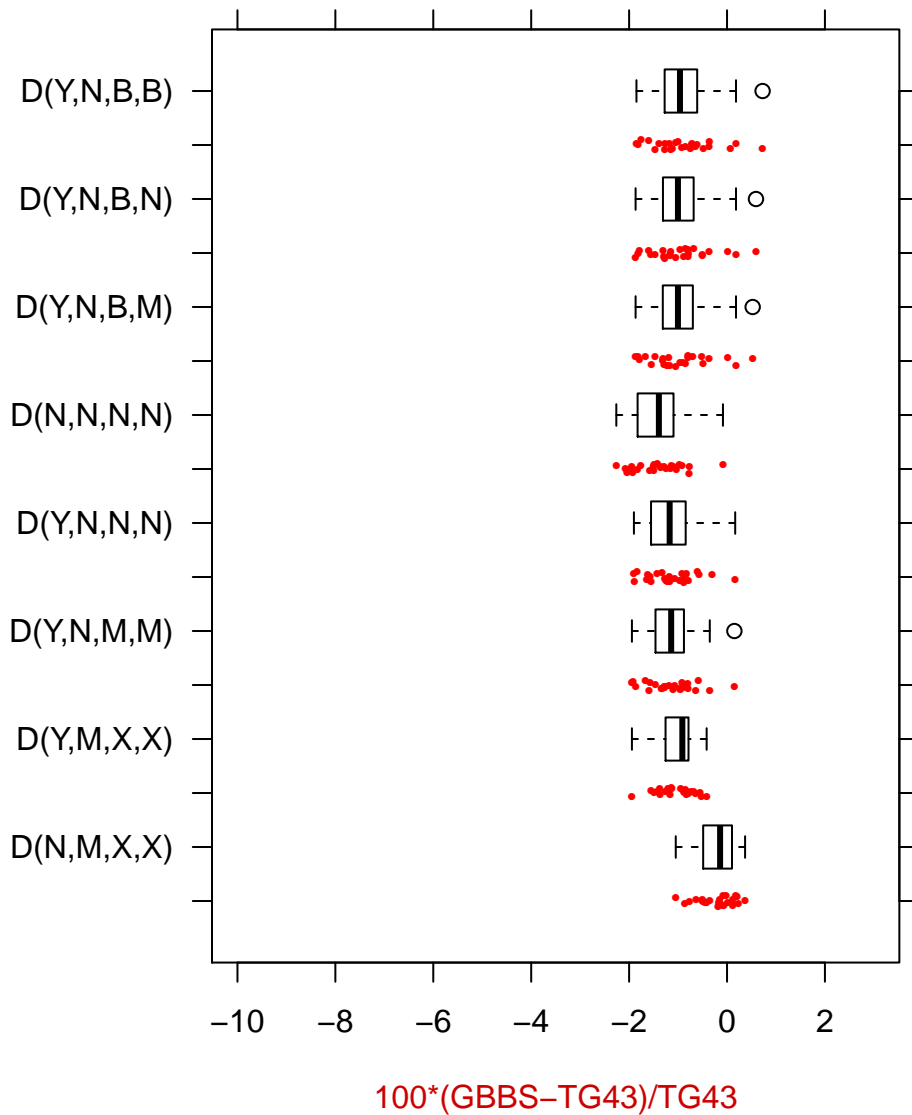

GBBS(solid model applicator, body, balloon & rectal contrast, packing contrast)

A right

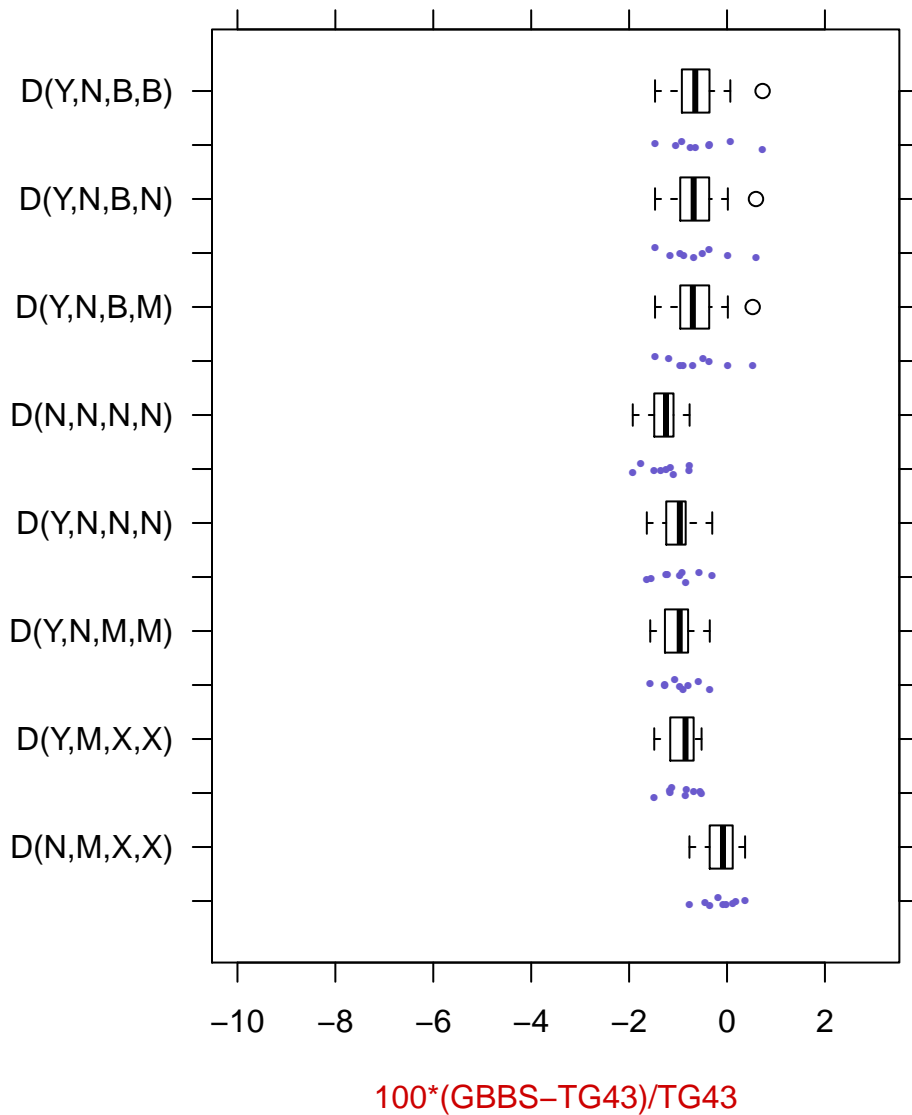

GBBS(solid model applicator, body, balloon & rectal contrast, packing contrast)

A right

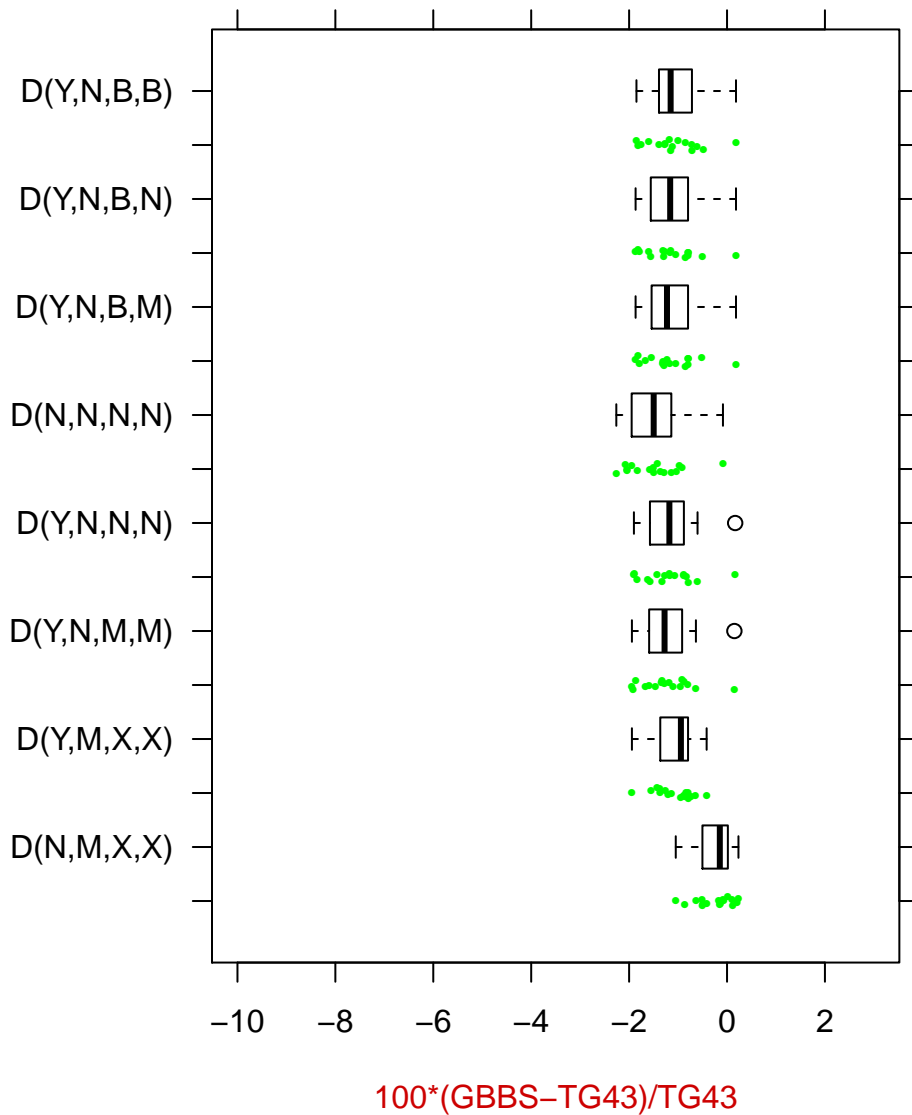



GBBS(solid model applicator, body, balloon & rectal contrast, packing contrast)

A right

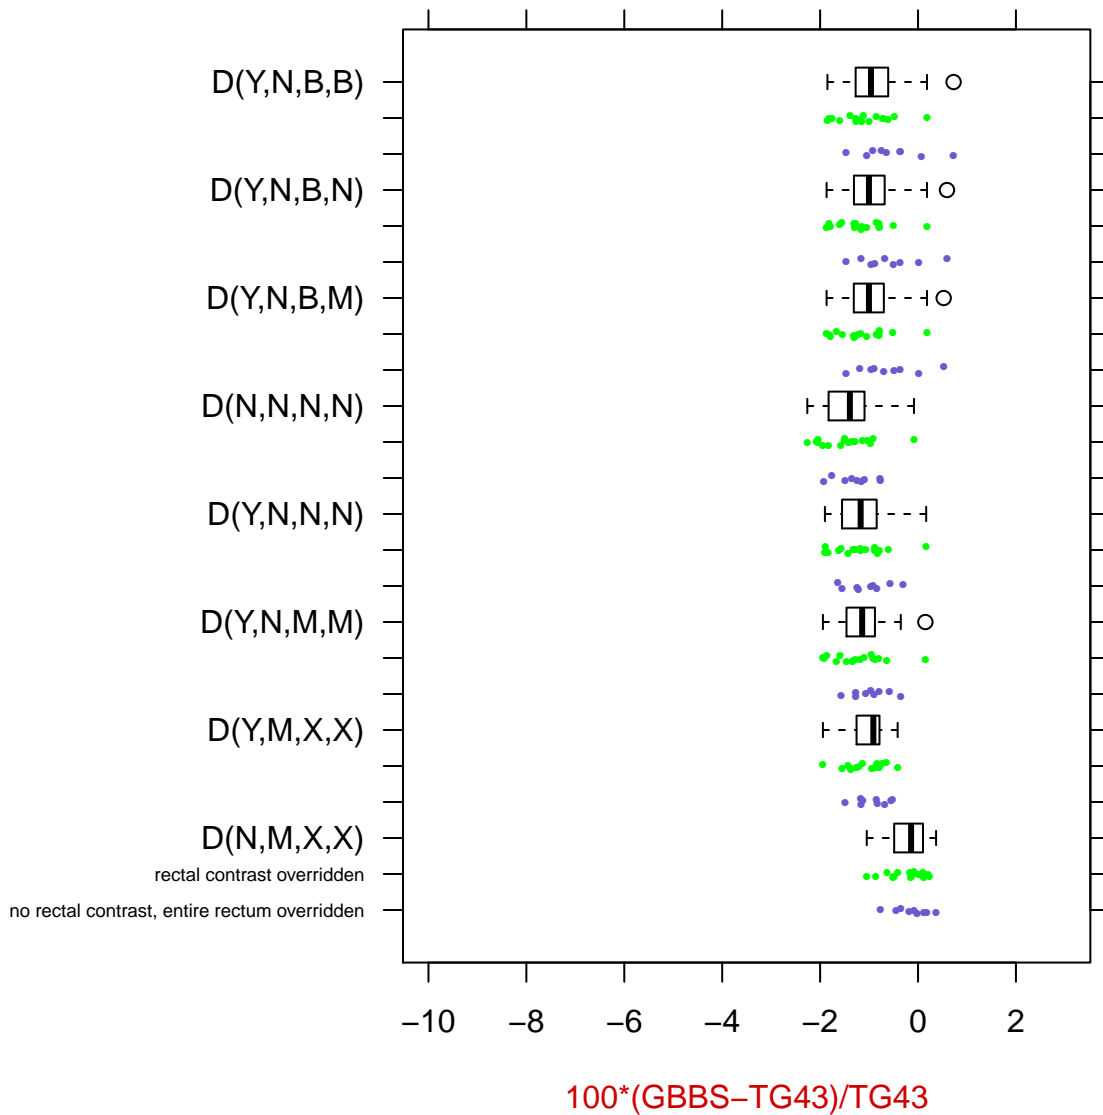

GBBS(solid model applicator, body, balloon & rectal contrast, packing contrast)

### B left

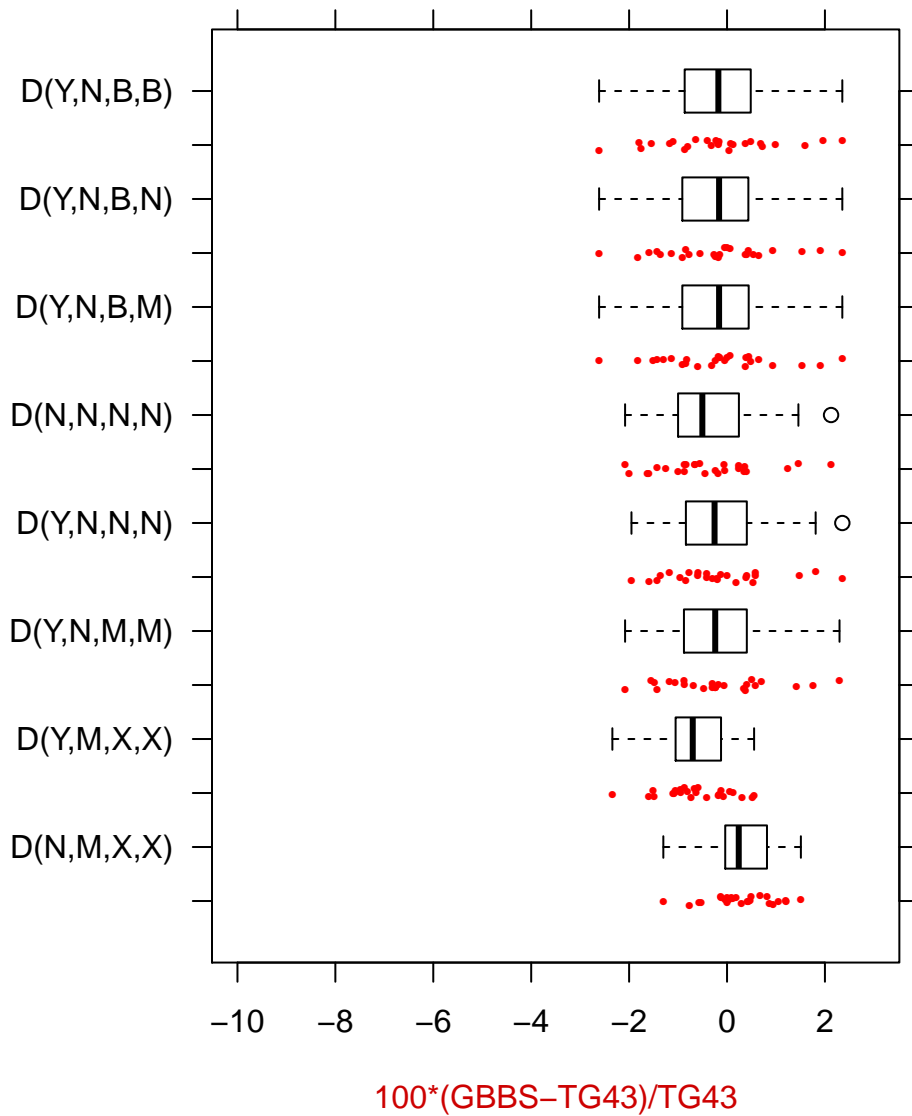

GBBS(solid model applicator, body, balloon & rectal contrast, packing contrast)

### B left

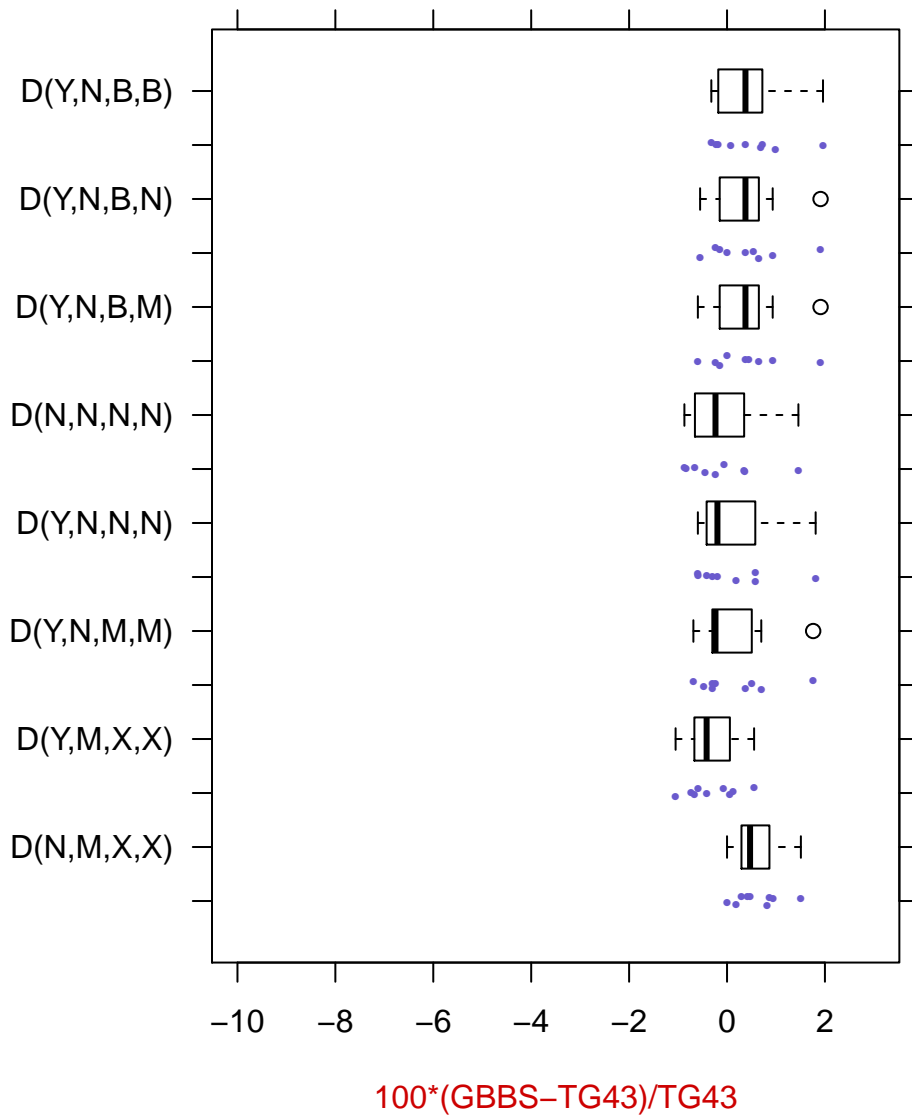

GBBS(solid model applicator, body, balloon & rectal contrast, packing contrast)

### B left

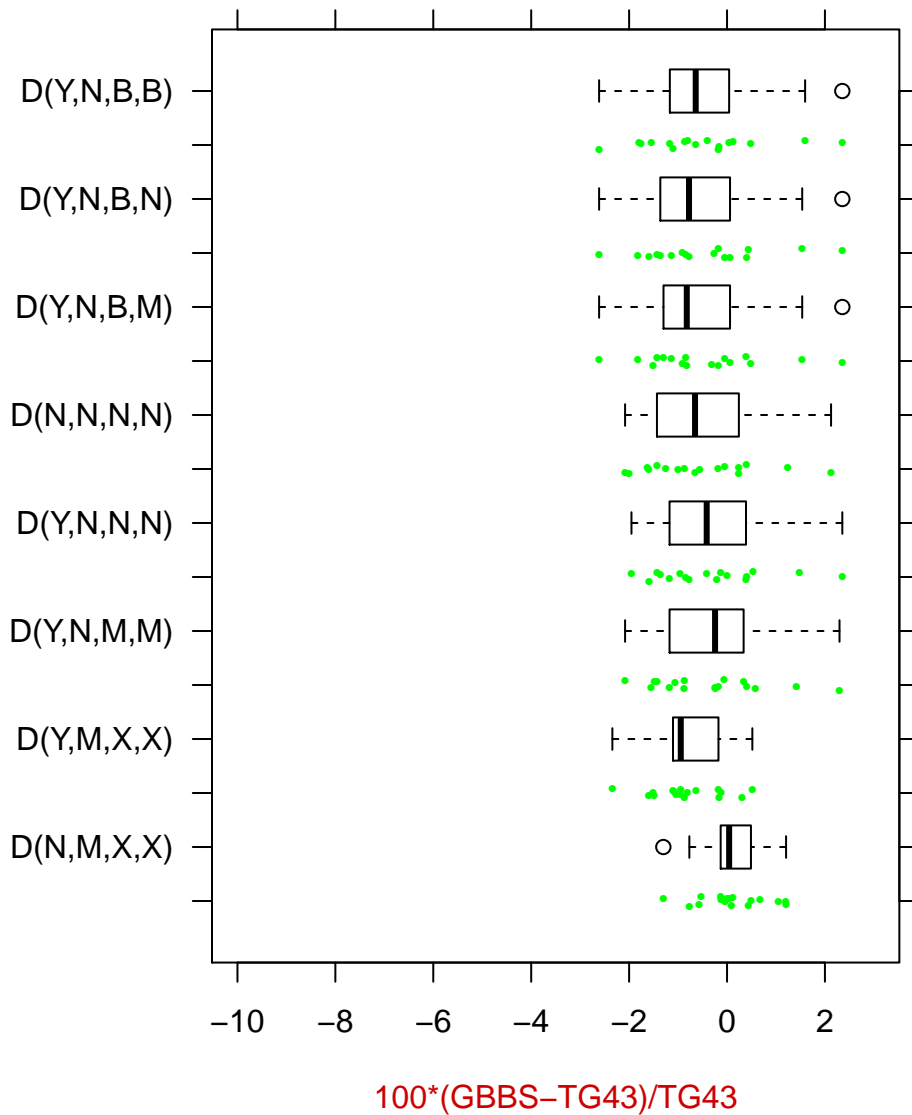

GBBS(solid model applicator, body, balloon & rectal contrast, packing contrast)

### B left

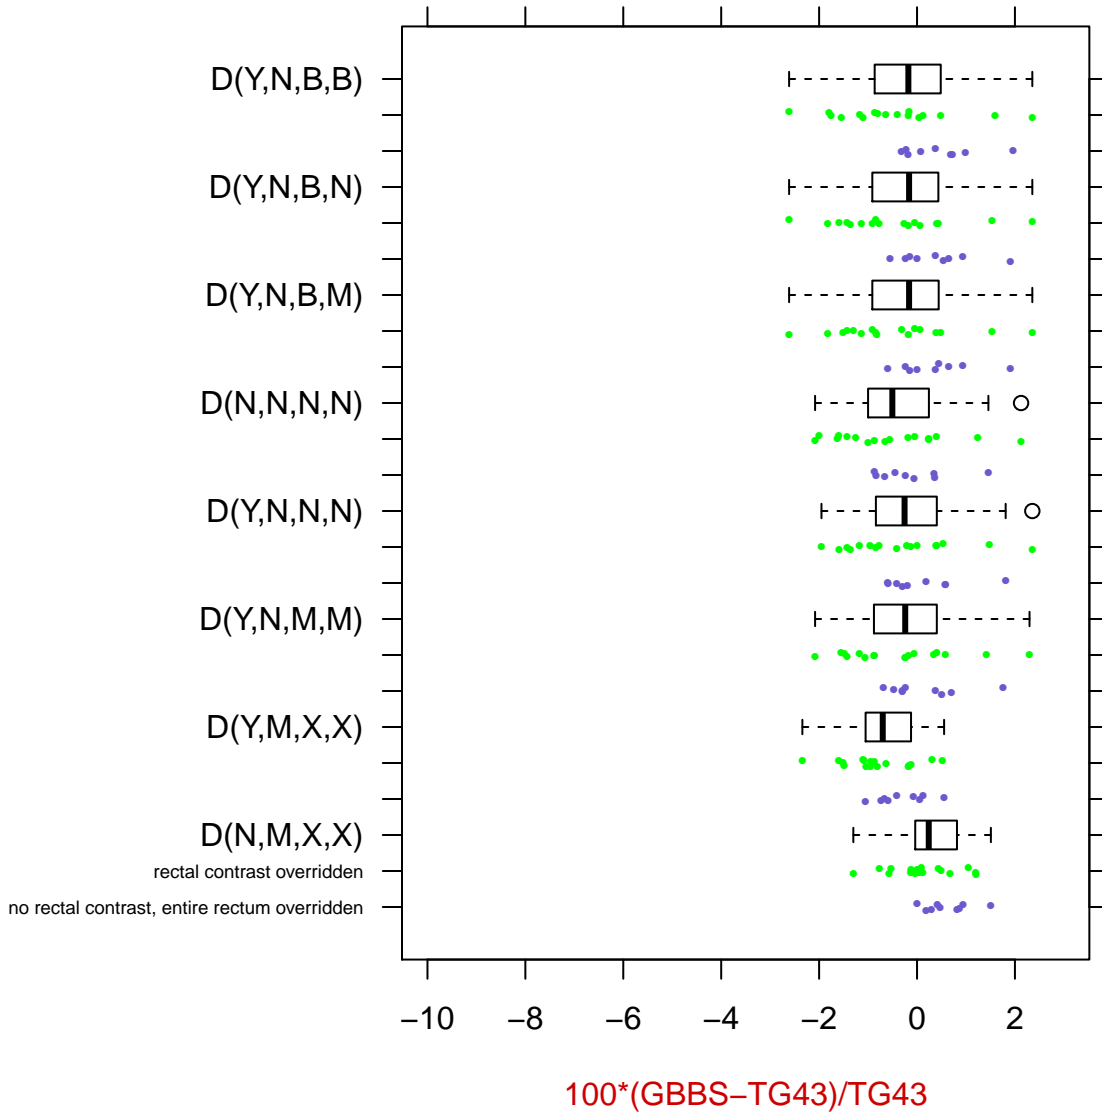

GBBS(solid model applicator, body, balloon & rectal contrast, packing contrast)

### B right

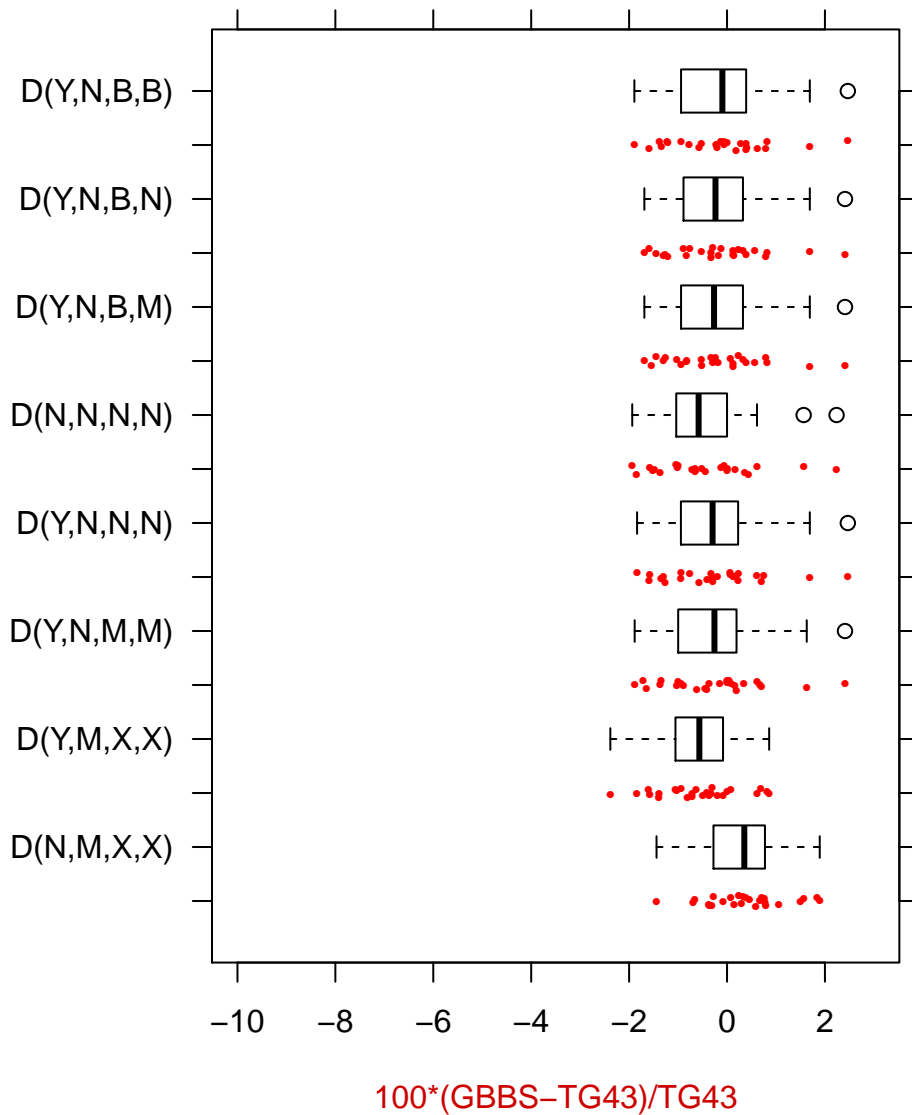

GBBS(solid model applicator, body, balloon & rectal contrast, packing contrast)

### B right

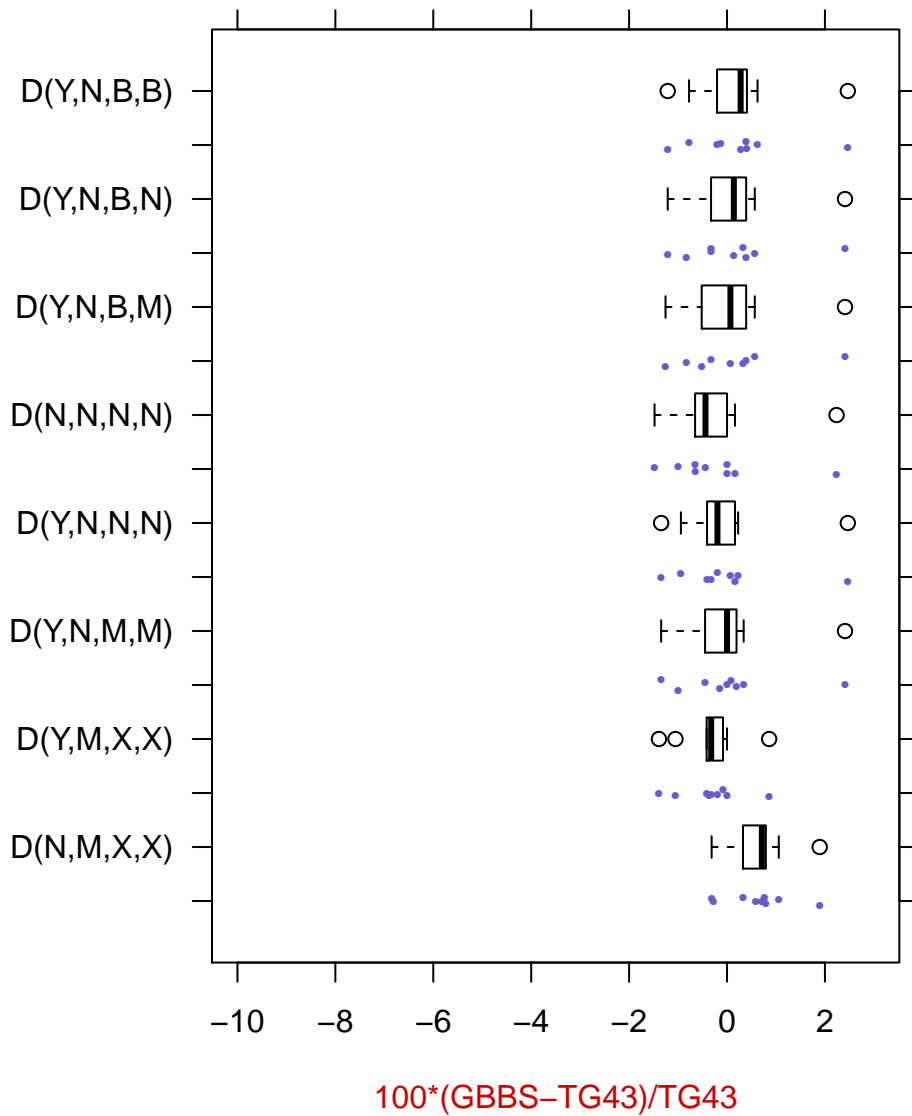

GBBS(solid model applicator, body, balloon & rectal contrast, packing contrast)

### B right

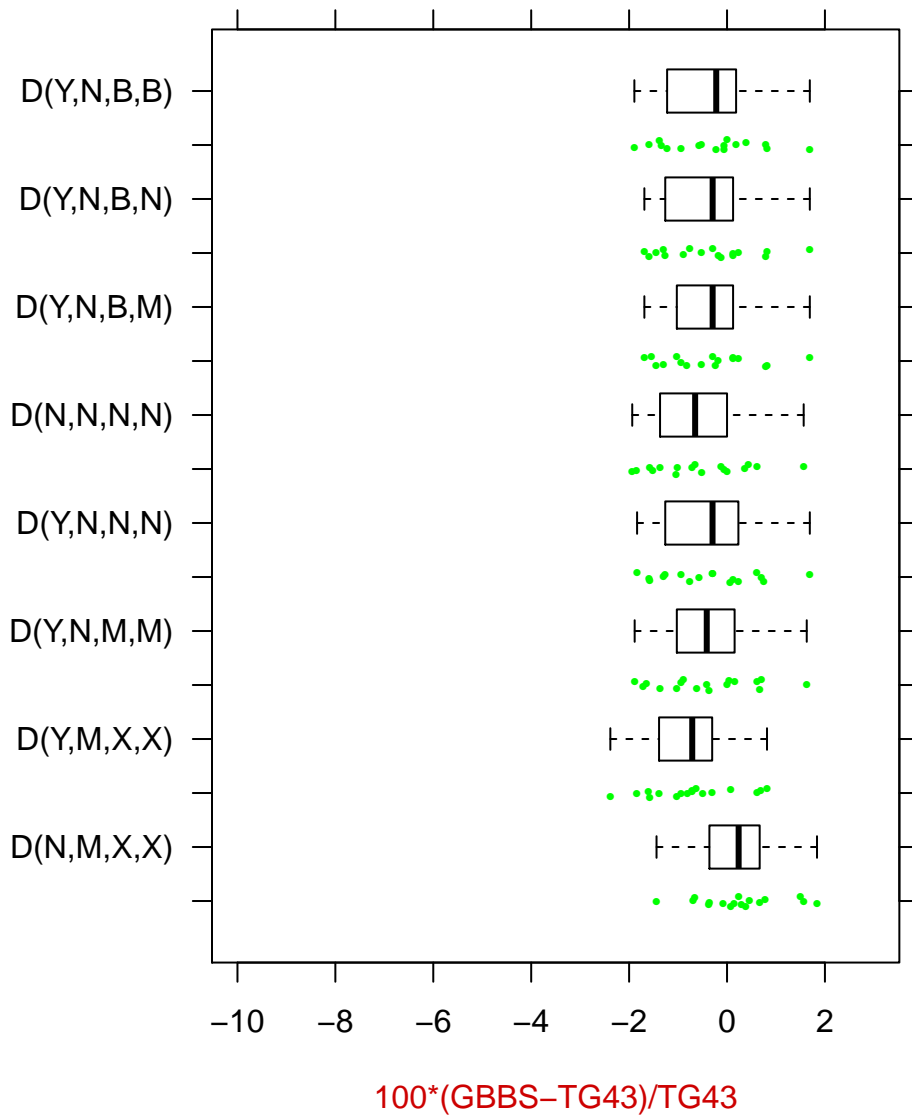



GBBS(solid model applicator, body, balloon & rectal contrast, packing contrast)

### B right

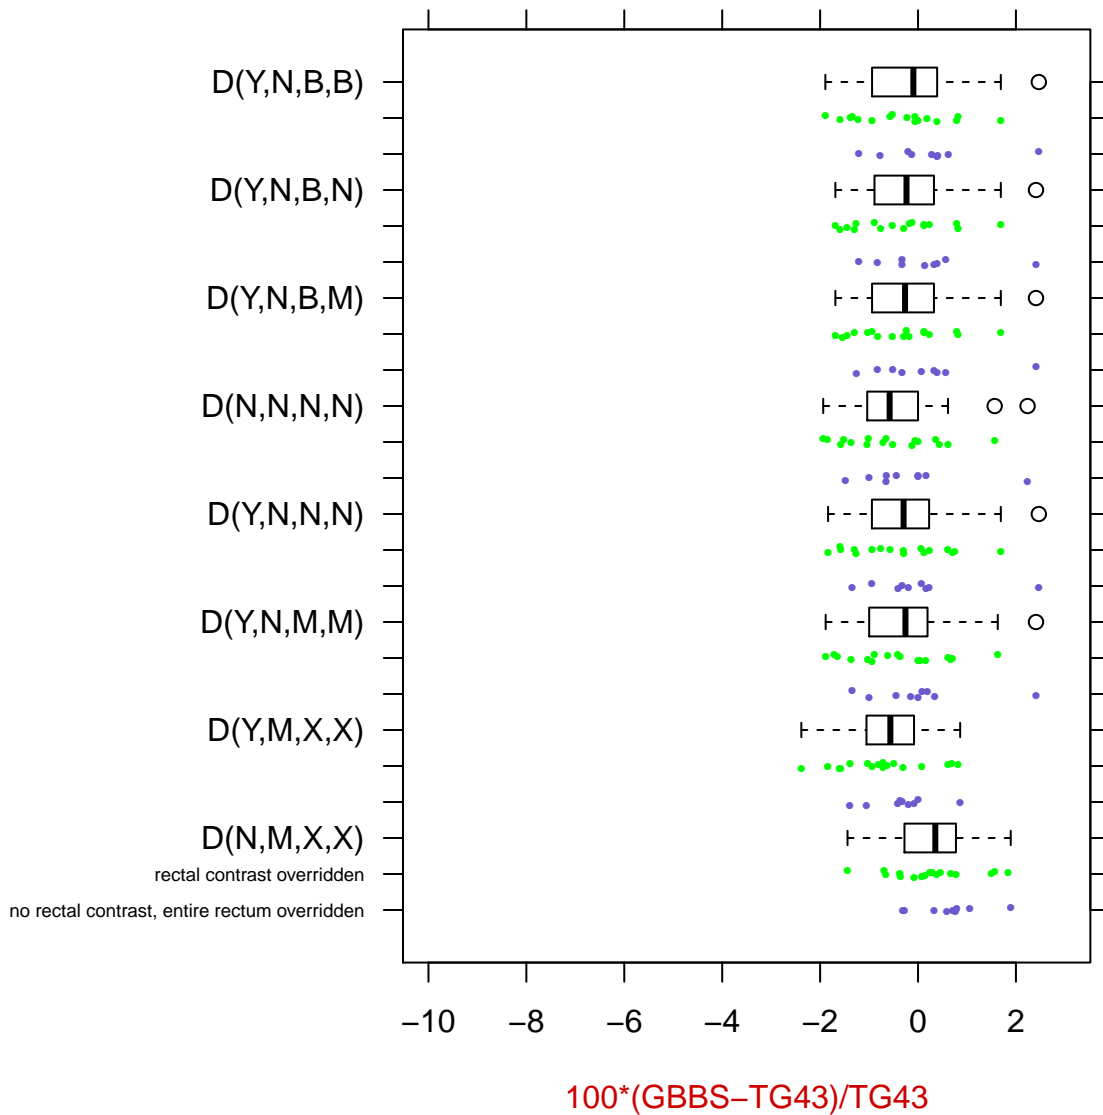

# ICRU bladder

GBBS(solid model applicator, body, balloon & rectal contrast, packing contrast)

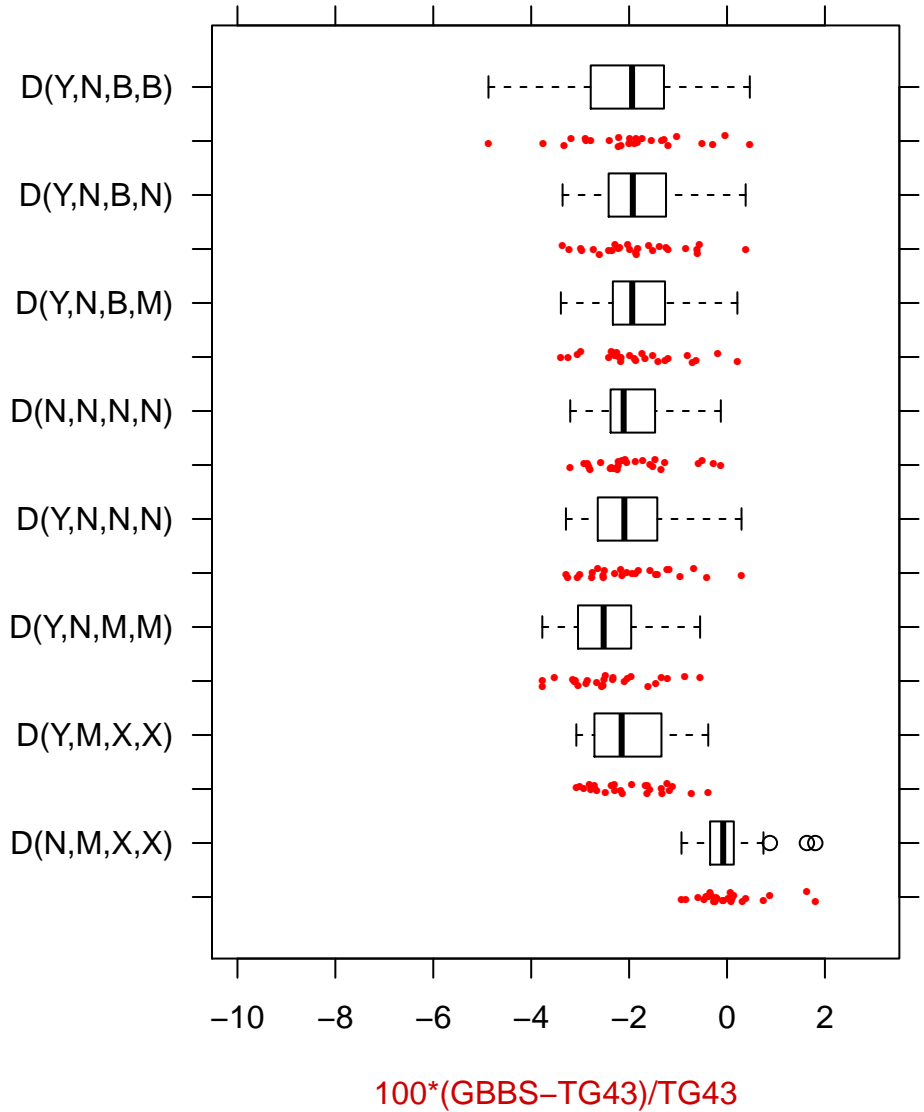

GBBS(solid model applicator, body, balloon & rectal contrast, packing contrast)

### ICRU bladder

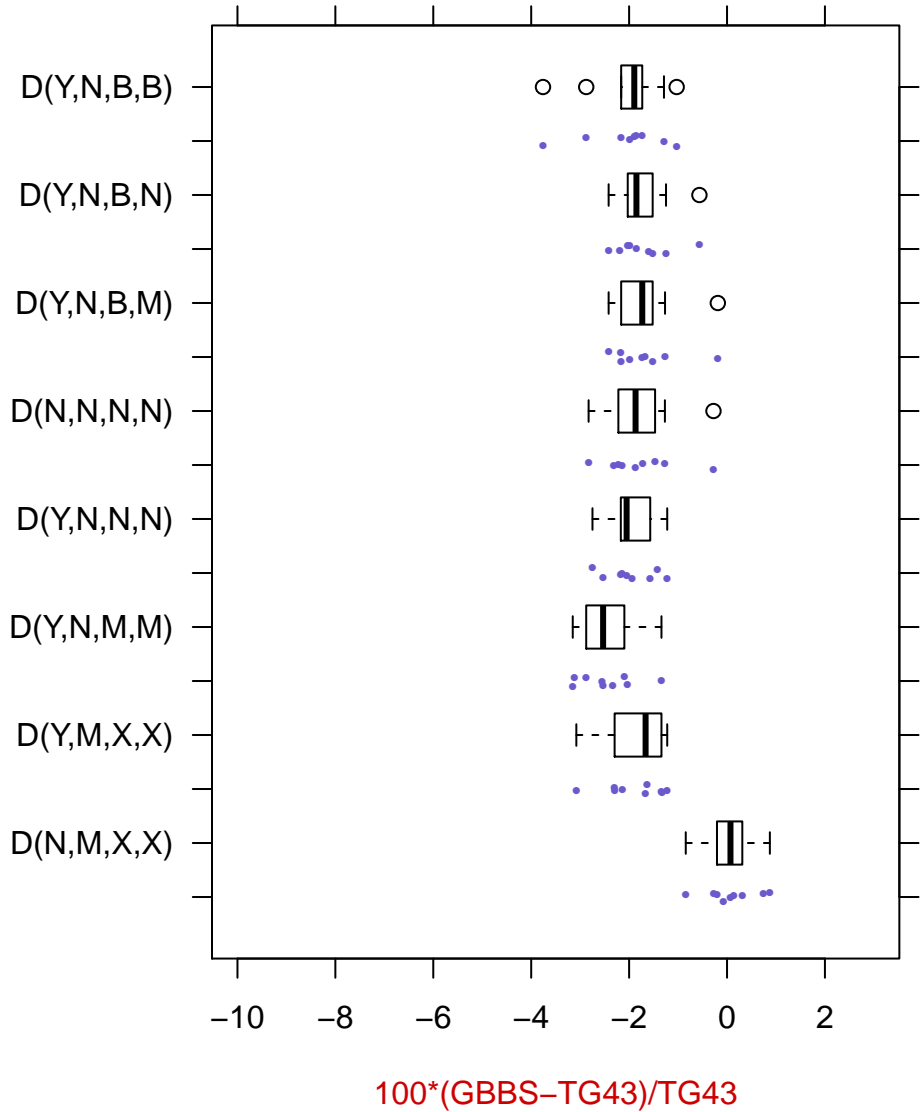

# ICRU bladder

GBBS(solid model applicator, body, balloon & rectal contrast, packing contrast)

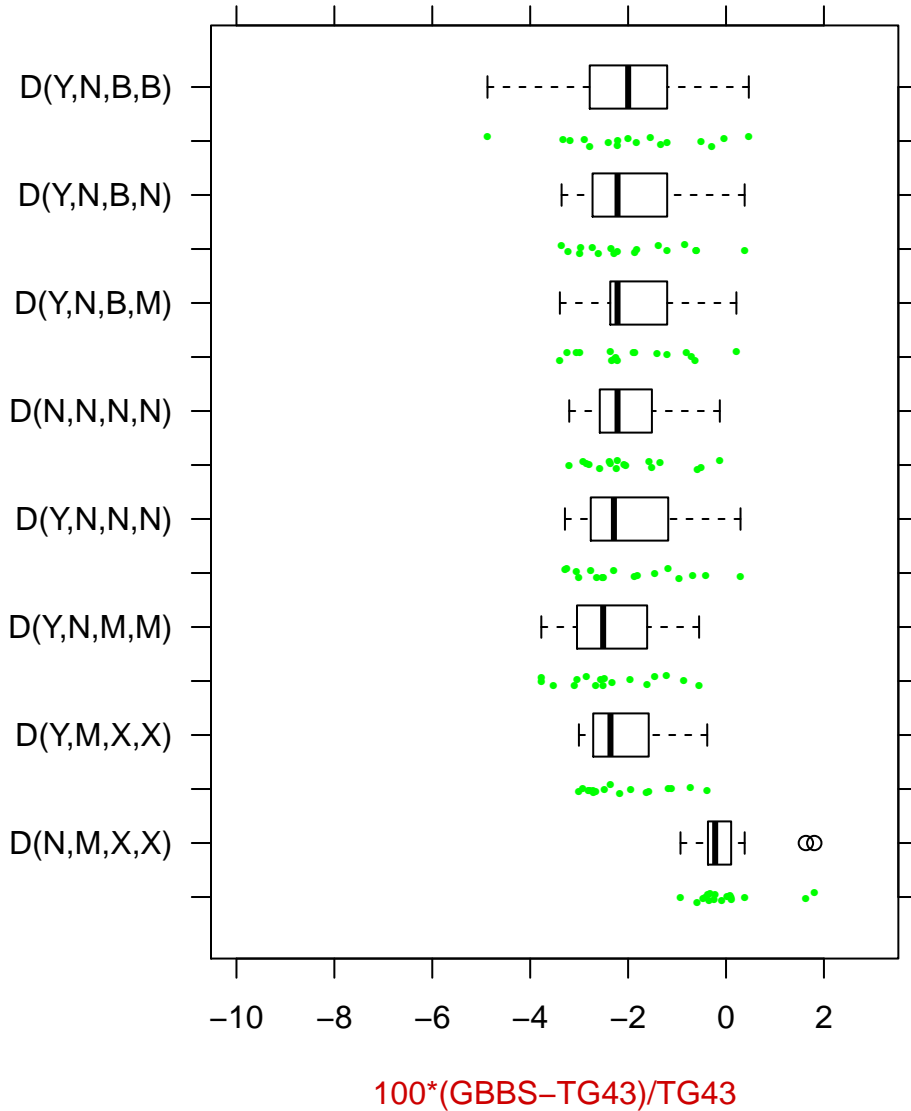

# ICRU bladder

GBBS(solid model applicator, body, balloon & rectal contrast, packing contrast)

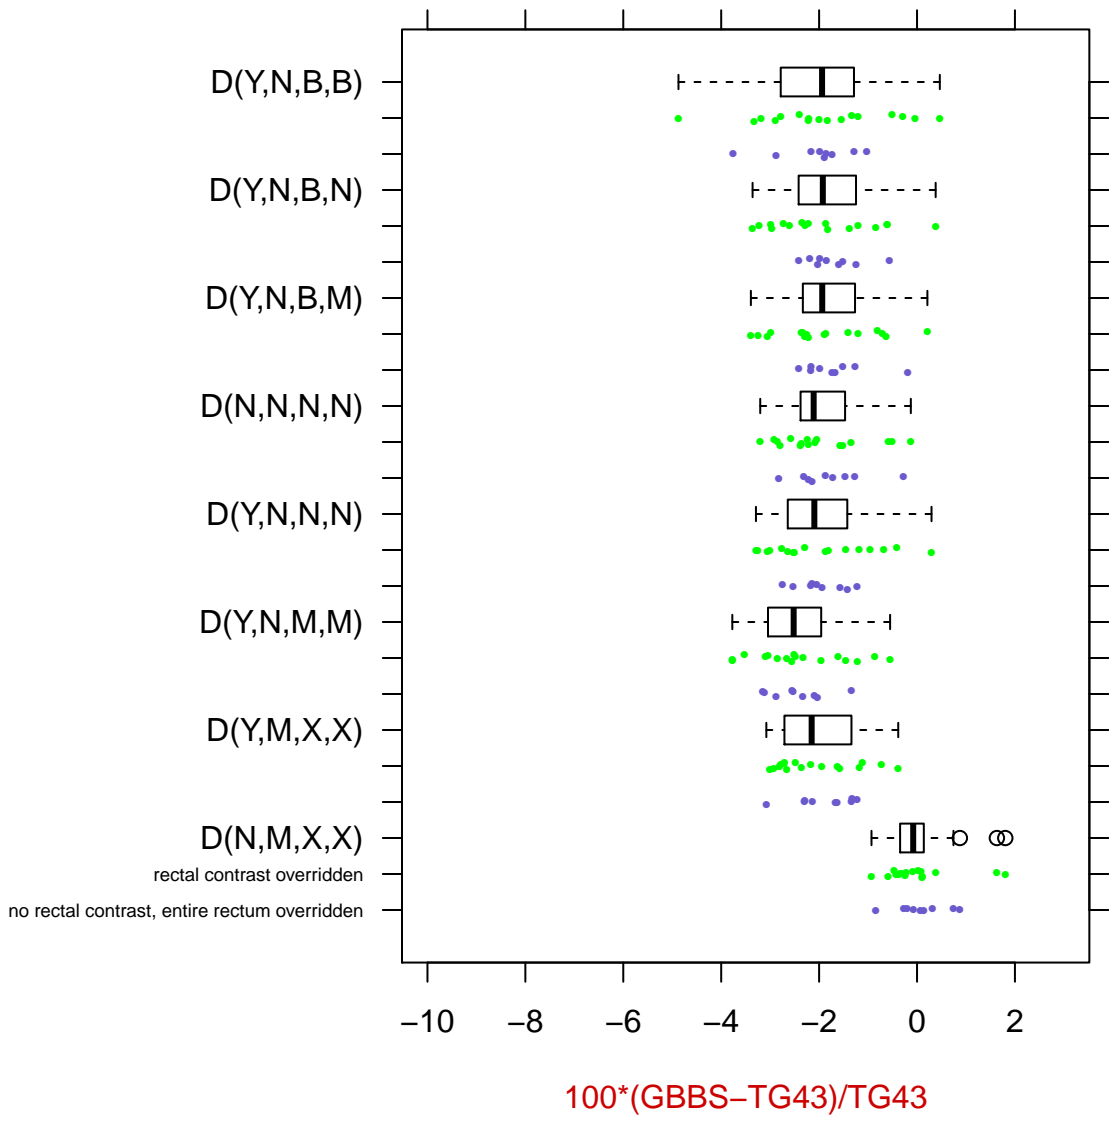

GBBS(solid model applicator, body, balloon & rectal contrast, packing contrast)

### ICRU rectum

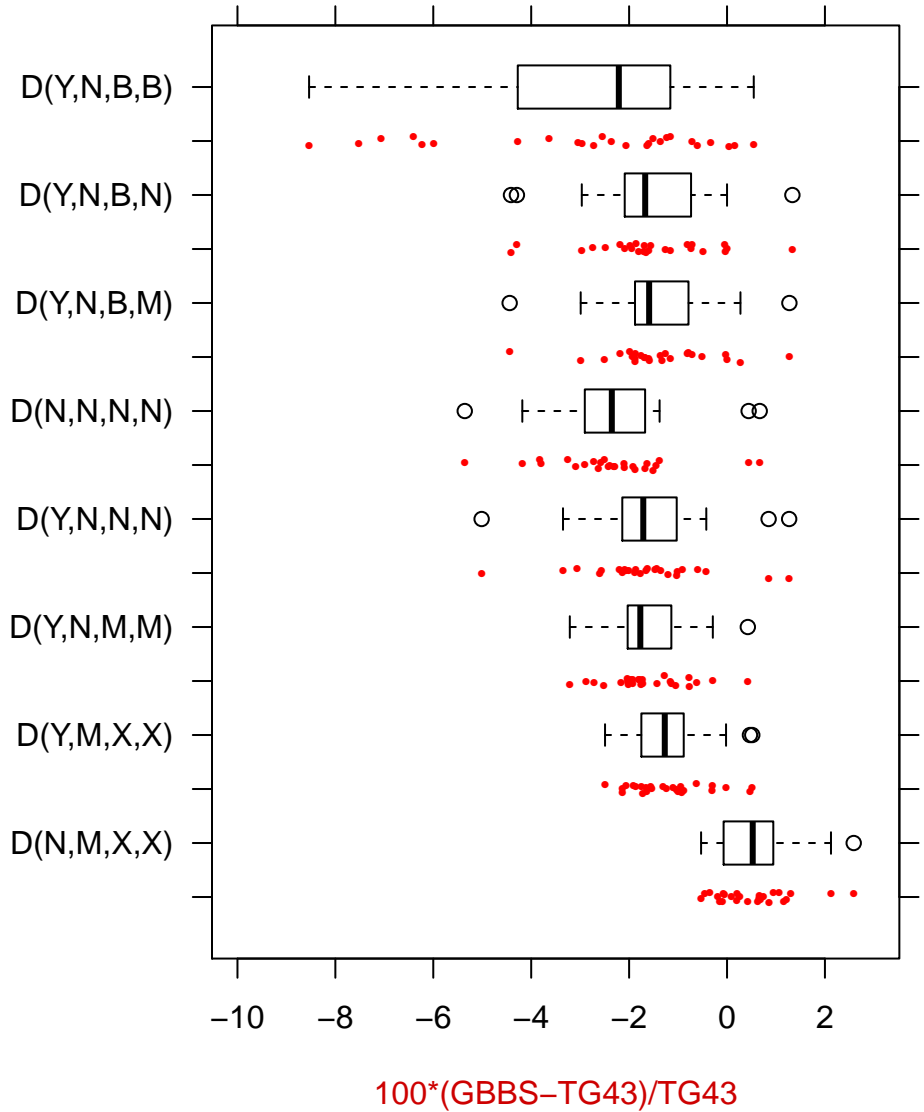

GBBS(solid model applicator, body, balloon & rectal contrast, packing contrast)

### ICRU rectum

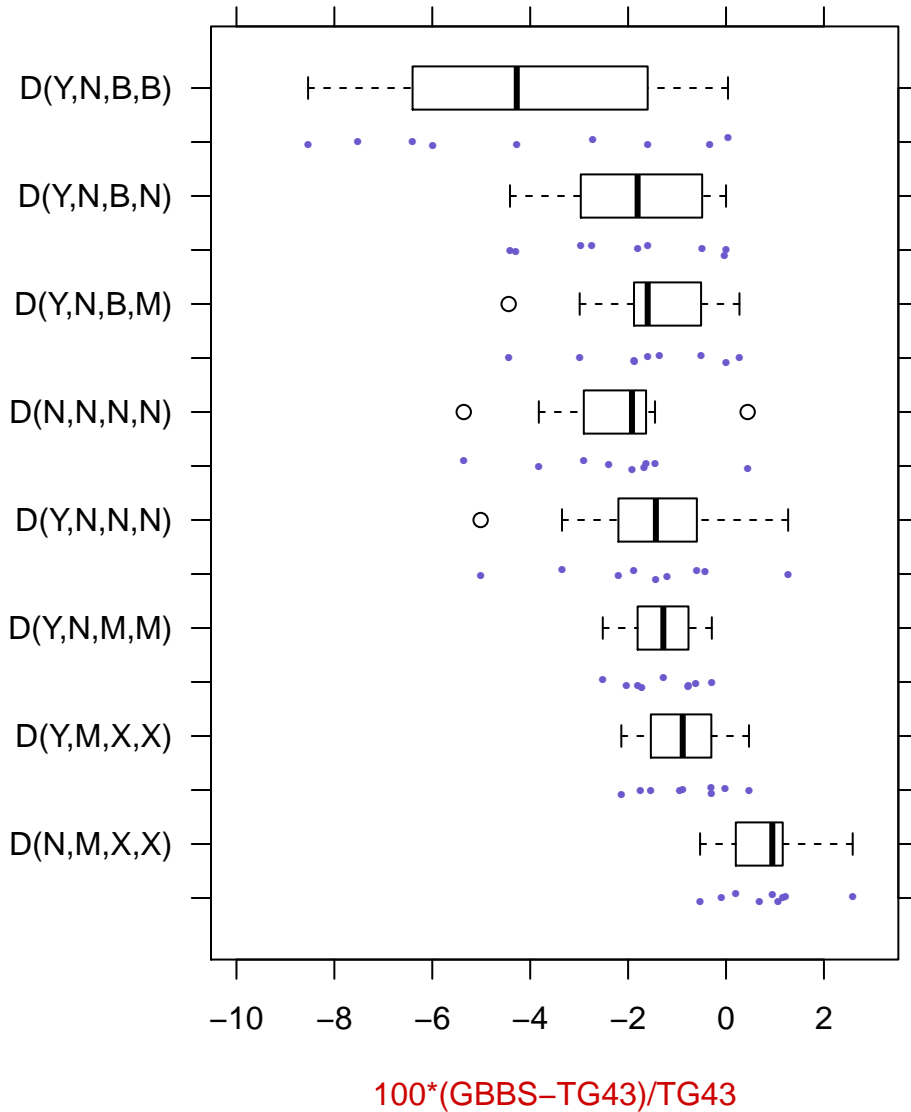

GBBS(solid model applicator, body, balloon & rectal contrast, packing contrast)

### ICRU rectum

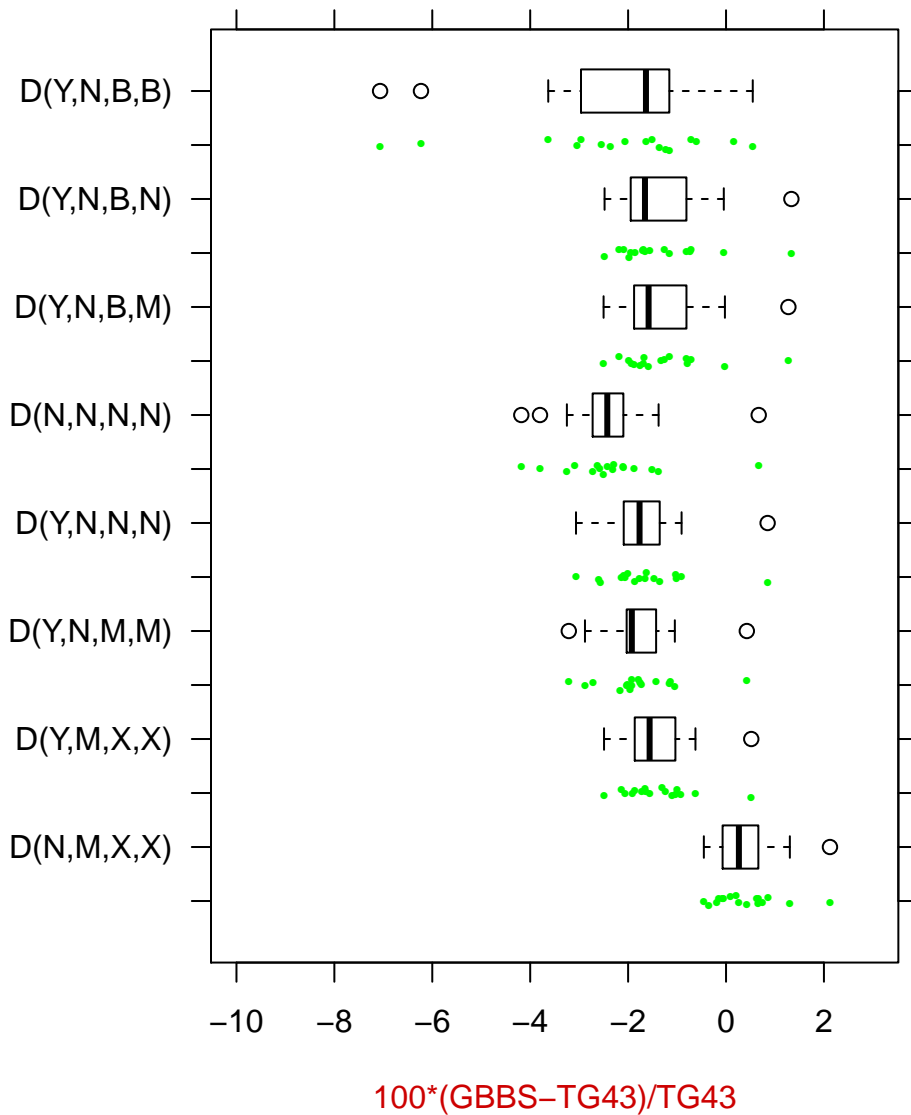



GBBS(solid model applicator, body, balloon & rectal contrast, packing contrast)

### ICRU rectum

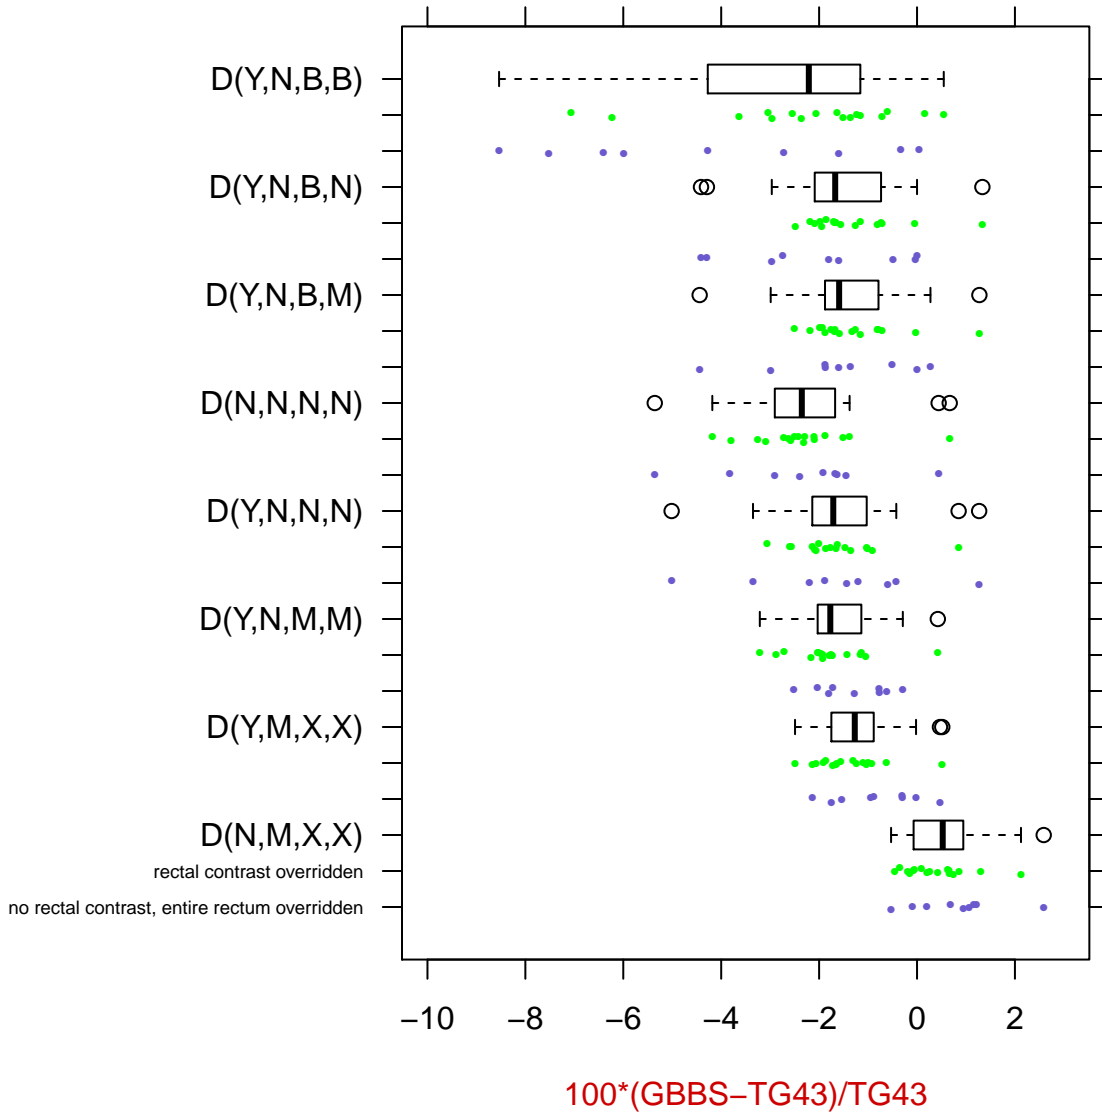

# D2cc bladder

GBBS(solid model applicator, body, balloon & rectal contrast, packing contrast)

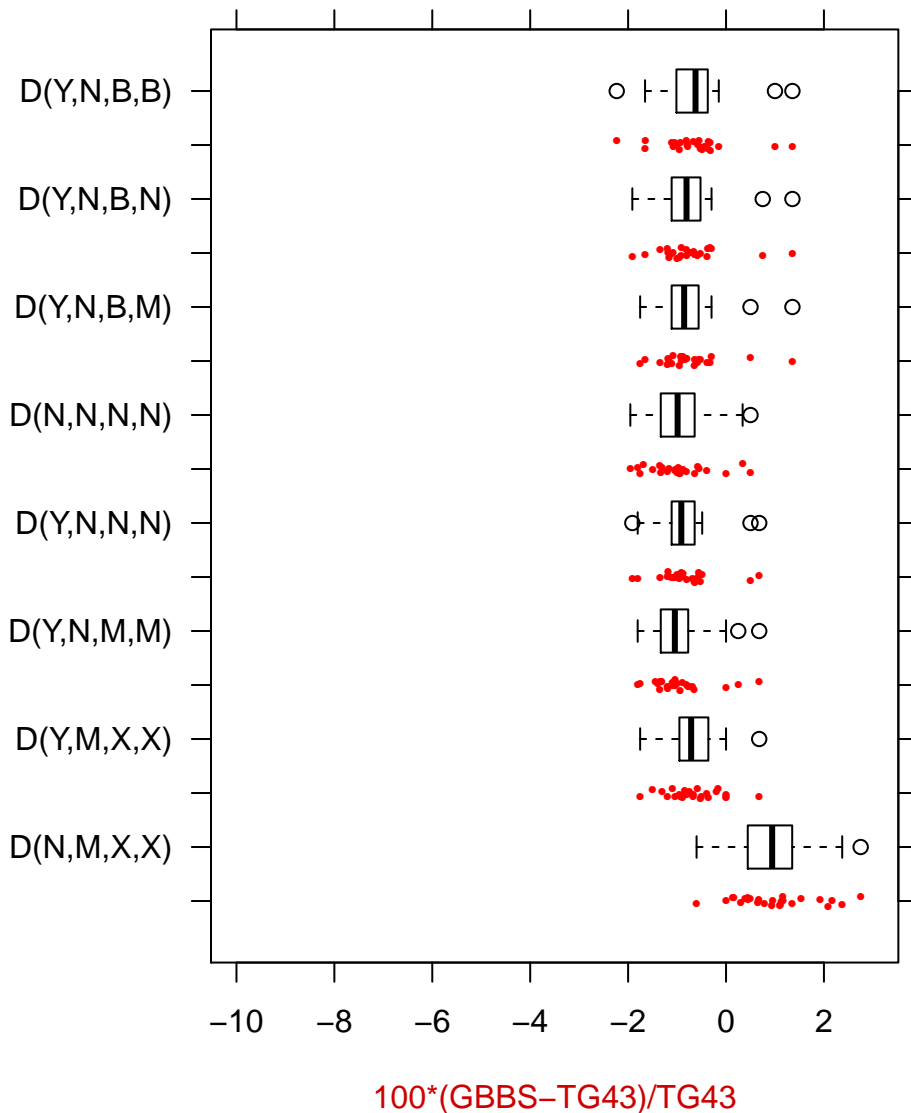

# D2cc bladder

GBBS(solid model applicator, body, balloon & rectal contrast, packing contrast)

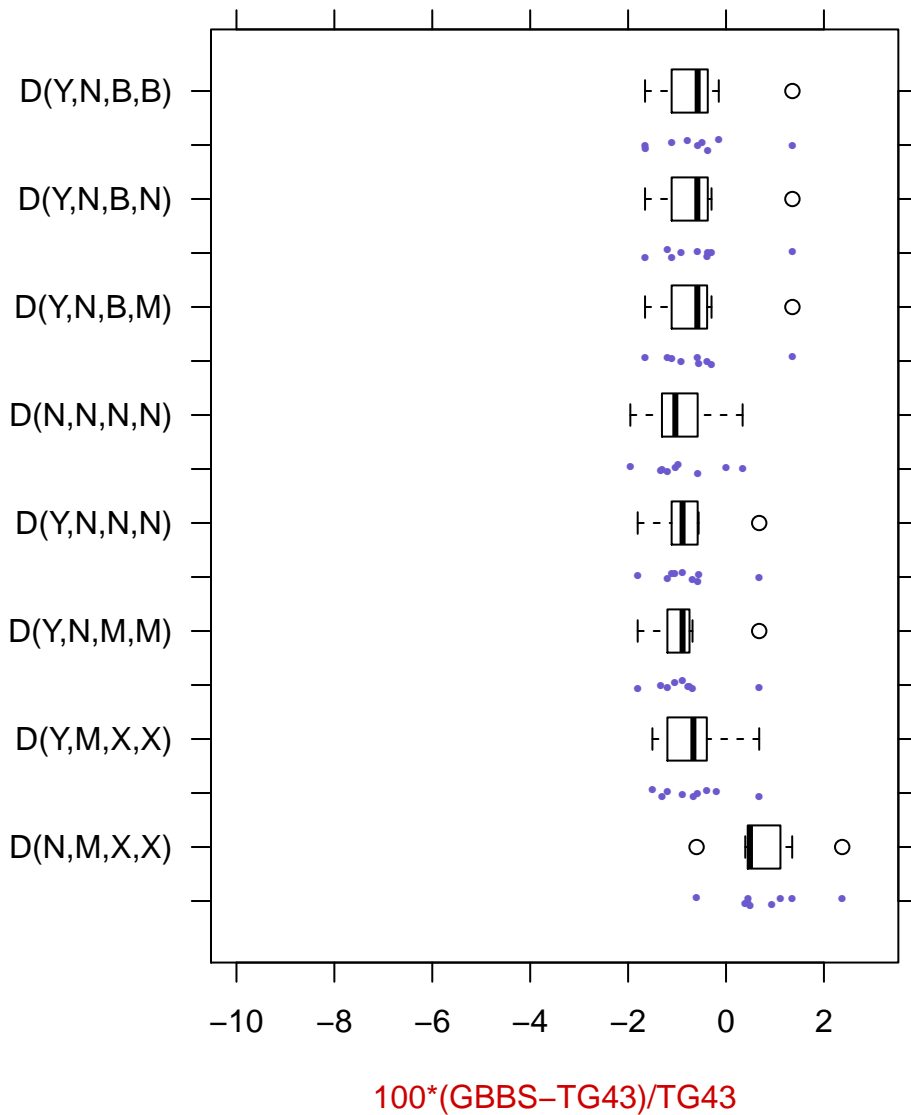

# D2cc bladder

GBBS(solid model applicator, body, balloon & rectal contrast, packing contrast)

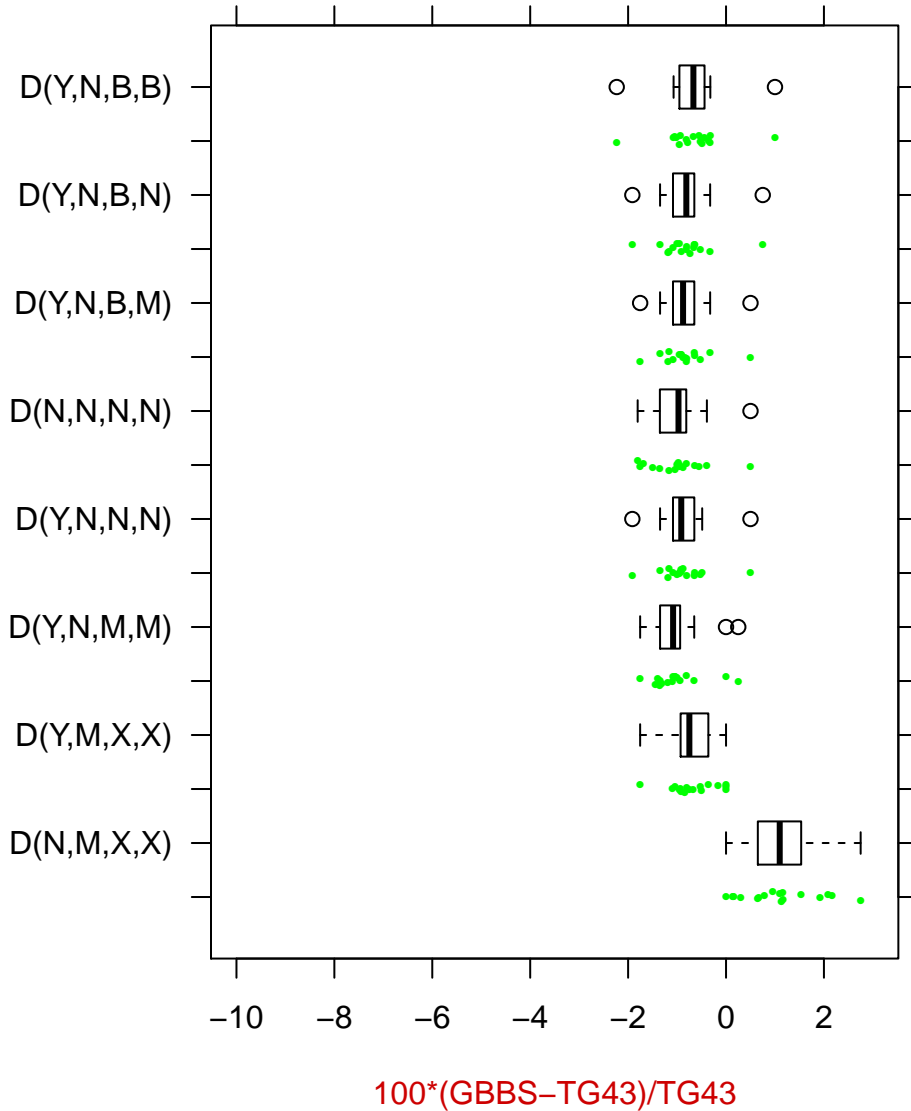

# D2cc bladder

GBBS(solid model applicator, body, balloon & rectal contrast, packing contrast)

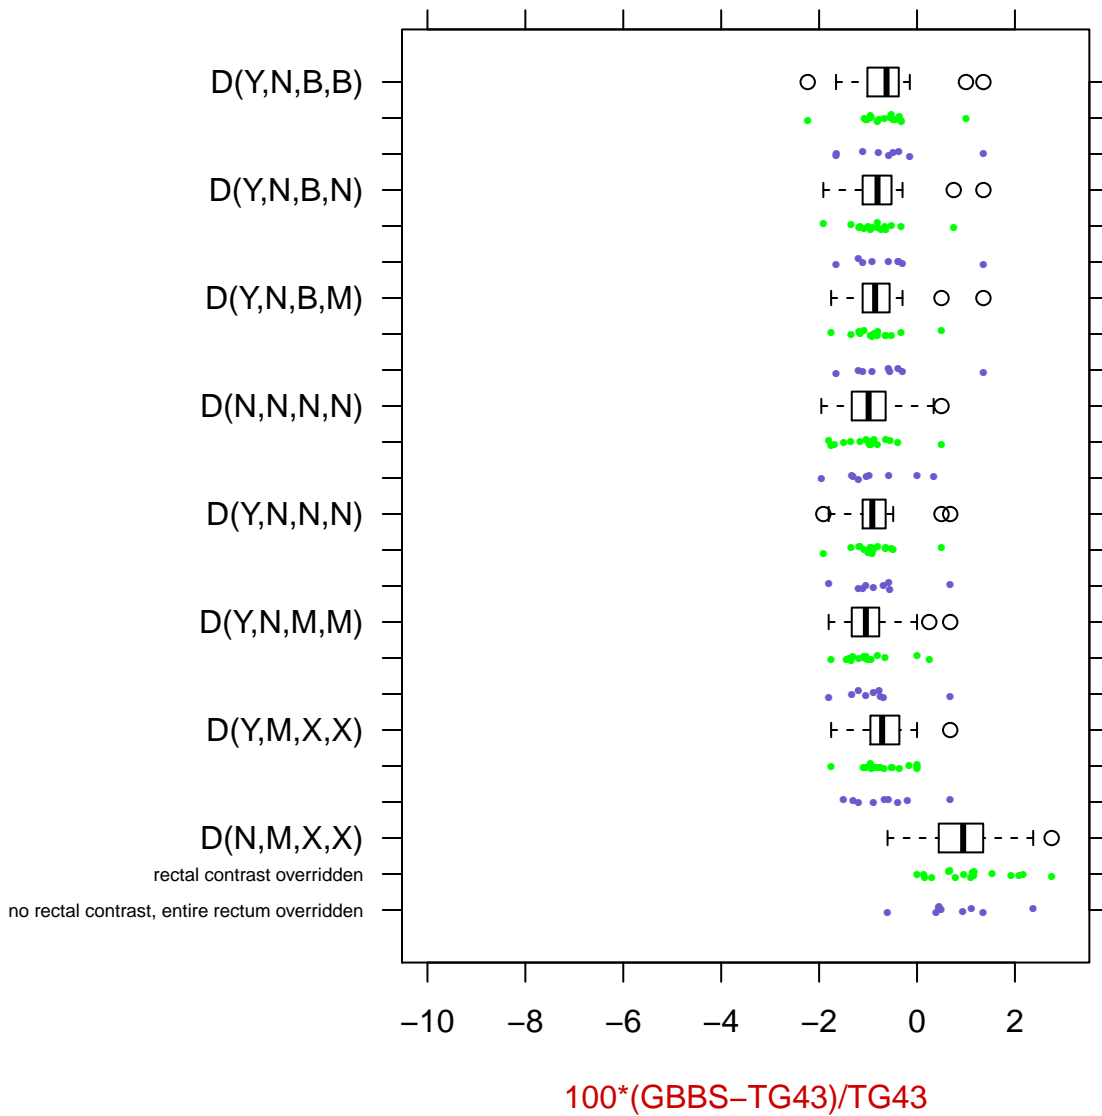

GBBS(solid model applicator, body, balloon & rectal contrast, packing contrast)

### D2cc rectum

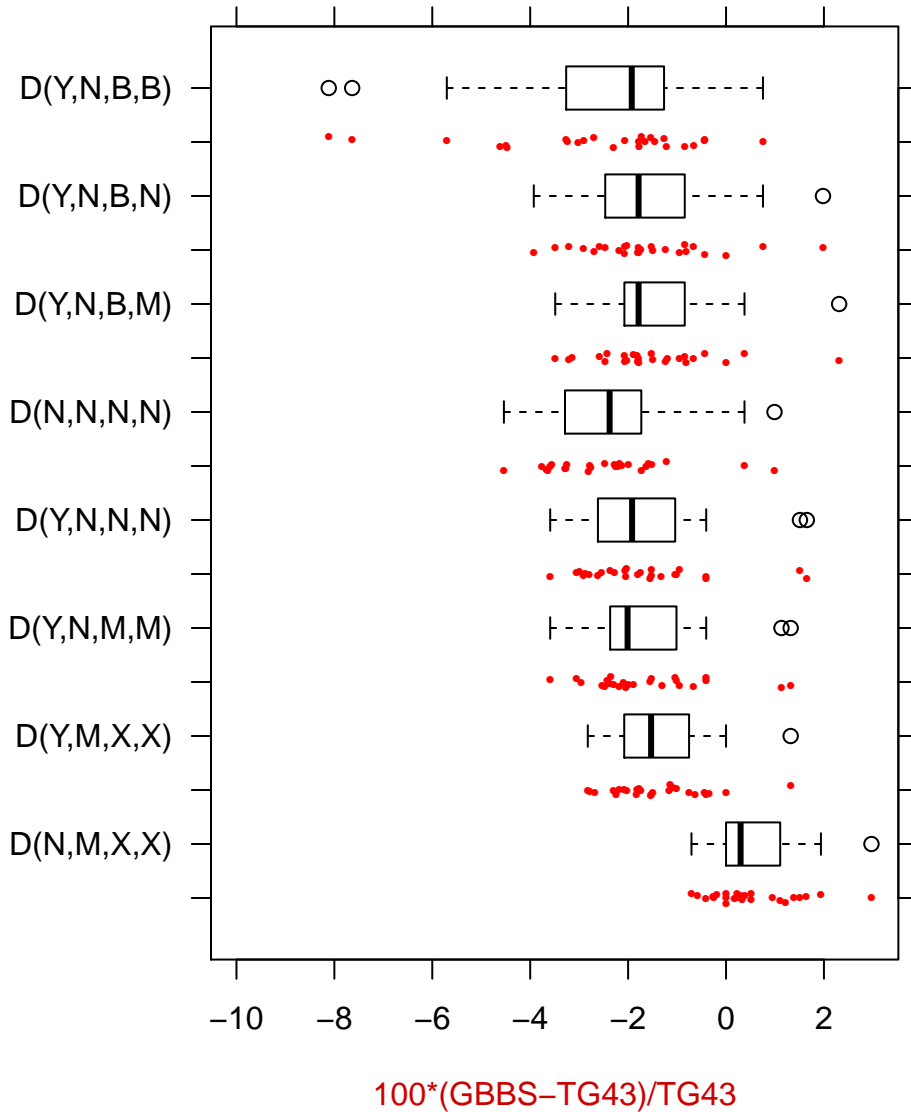

# D2cc rectum

GBBS(solid model applicator, body, balloon & rectal contrast, packing contrast)

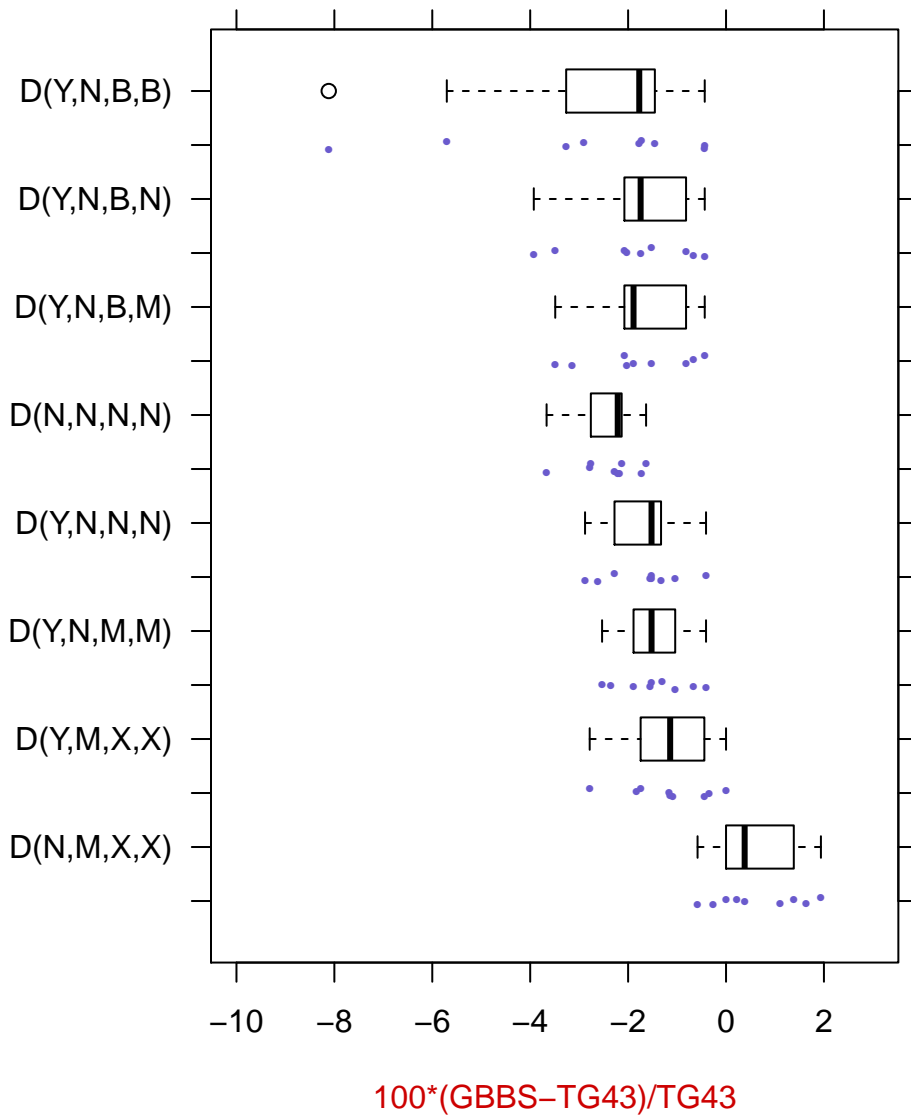

# D2cc rectum

GBBS(solid model applicator, body, balloon & rectal contrast, packing contrast)

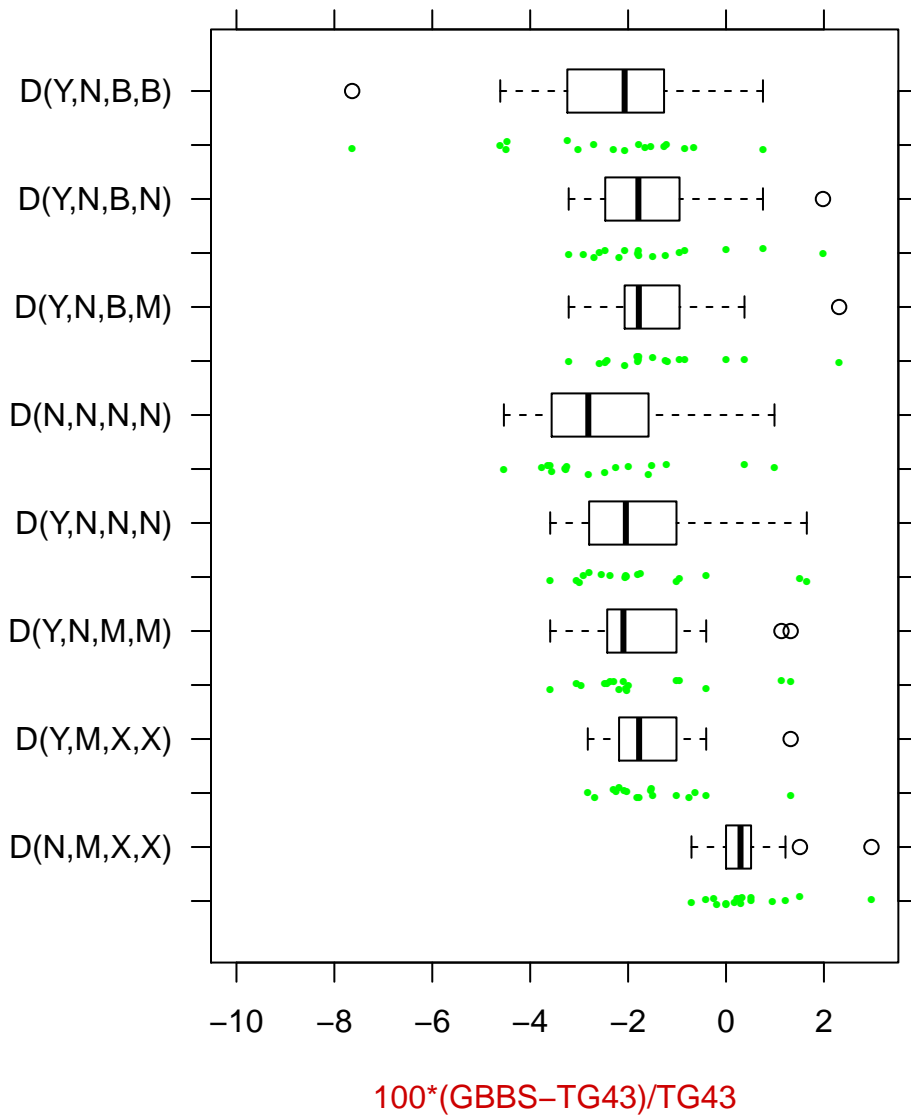



# D2cc rectum

GBBS(solid model applicator, body, balloon & rectal contrast, packing contrast)

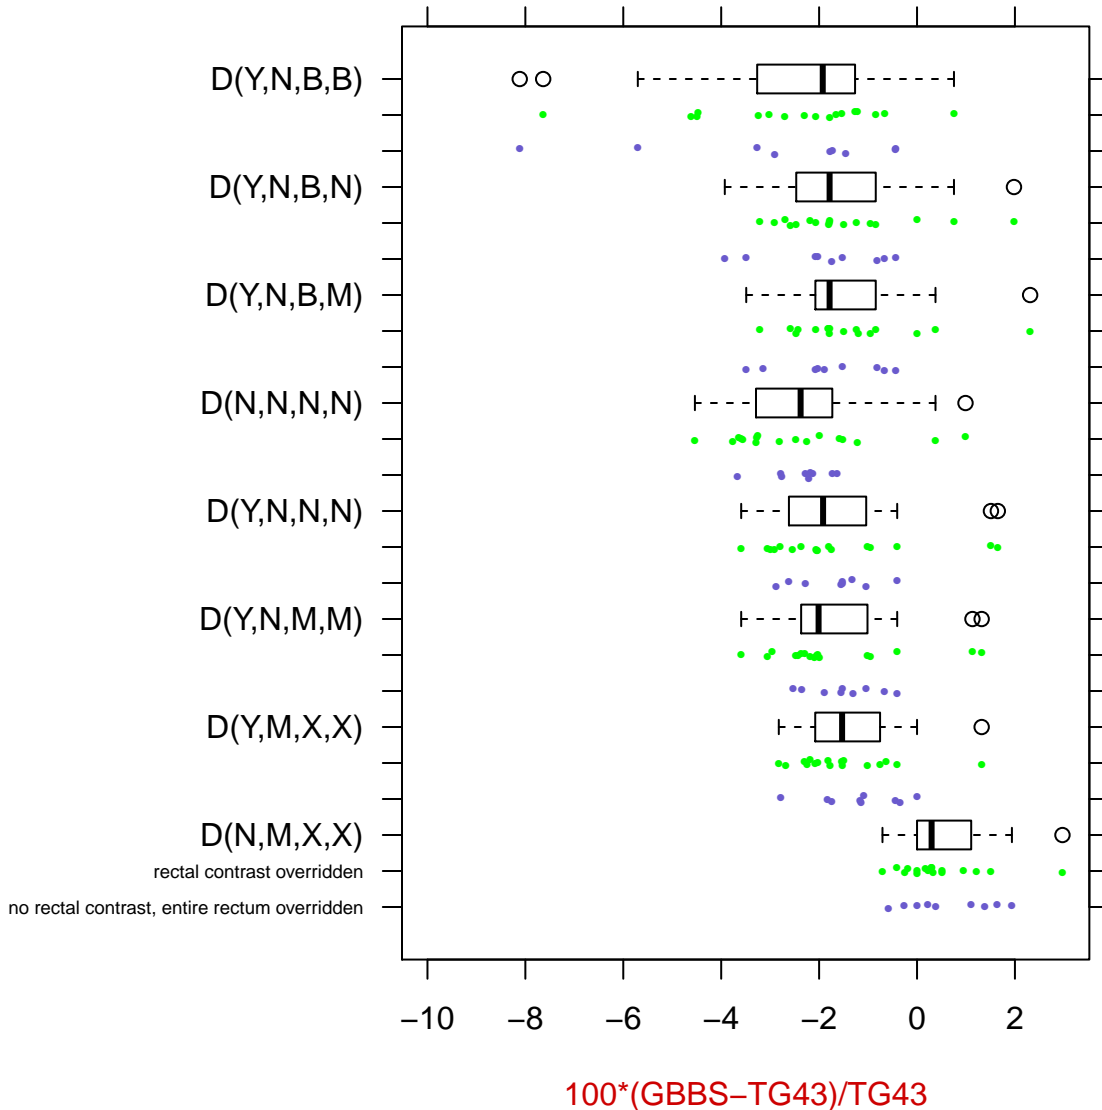

# D2cc sigmoid

GBBS(solid model applicator, body, balloon & rectal contrast, packing contrast)

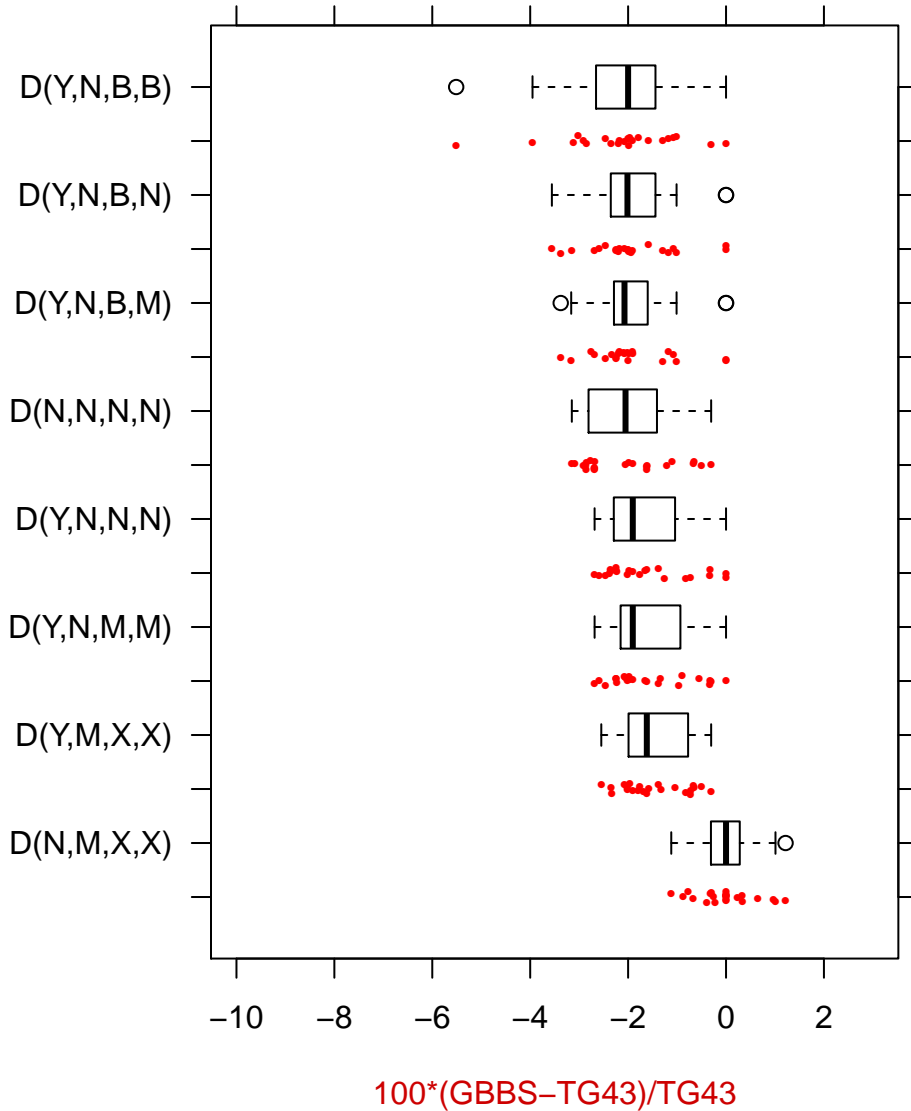

# D2cc sigmoid

GBBS(solid model applicator, body, balloon & rectal contrast, packing contrast)

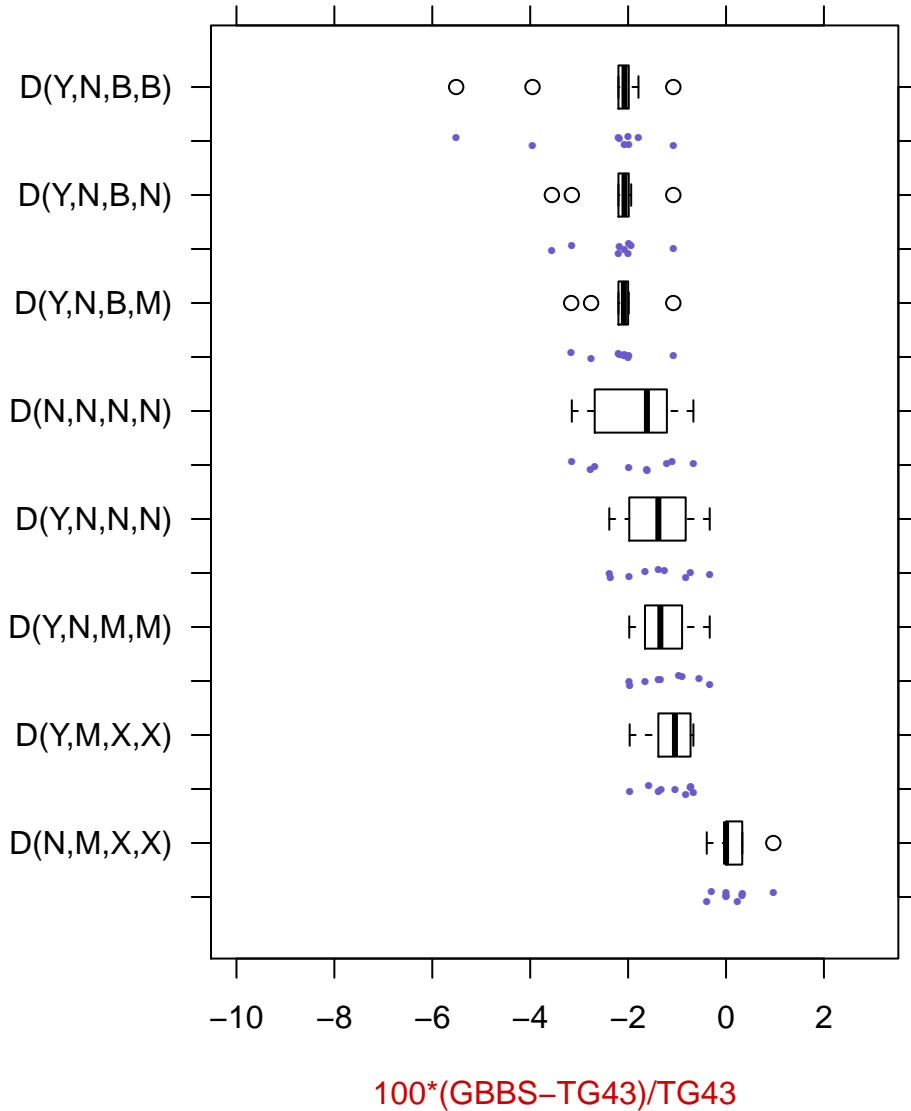

# D2cc sigmoid

GBBS(solid model applicator, body, balloon & rectal contrast, packing contrast)

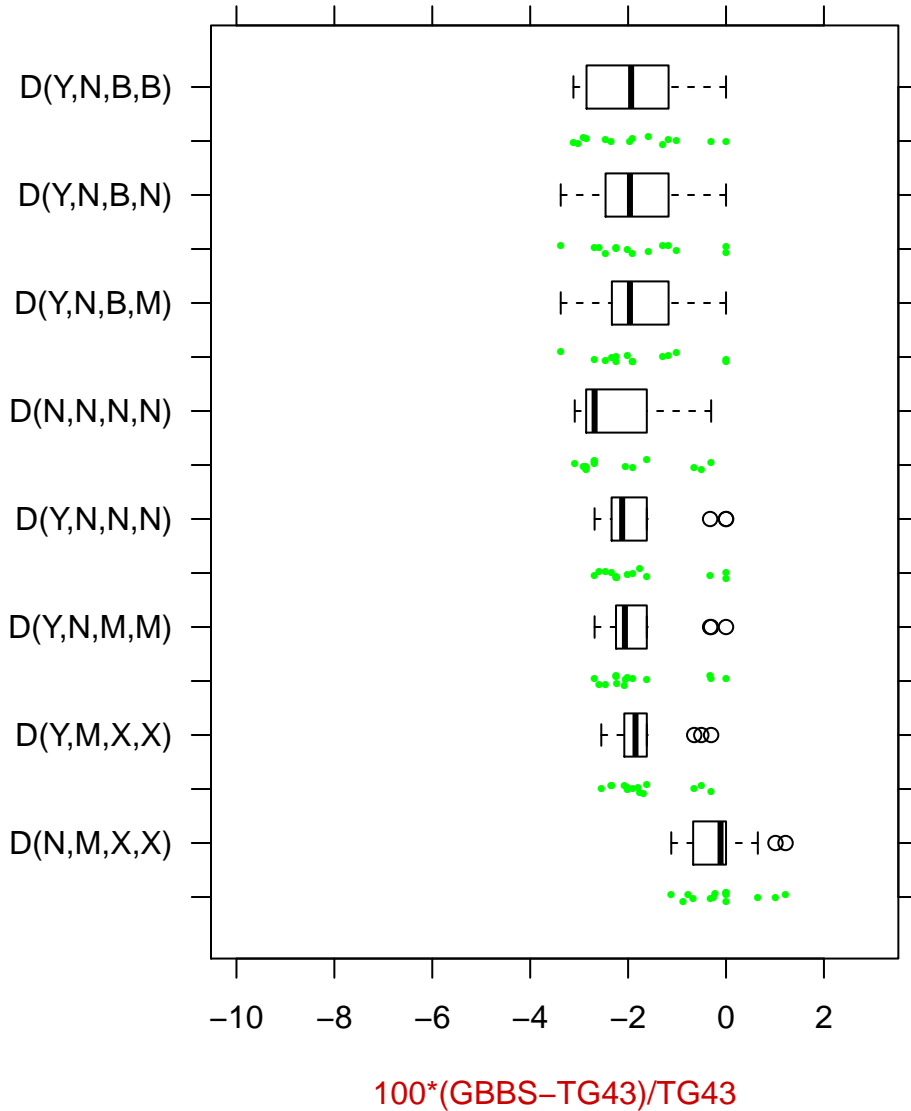

# D2cc sigmoid

GBBS(solid model applicator, body, balloon & rectal contrast, packing contrast)

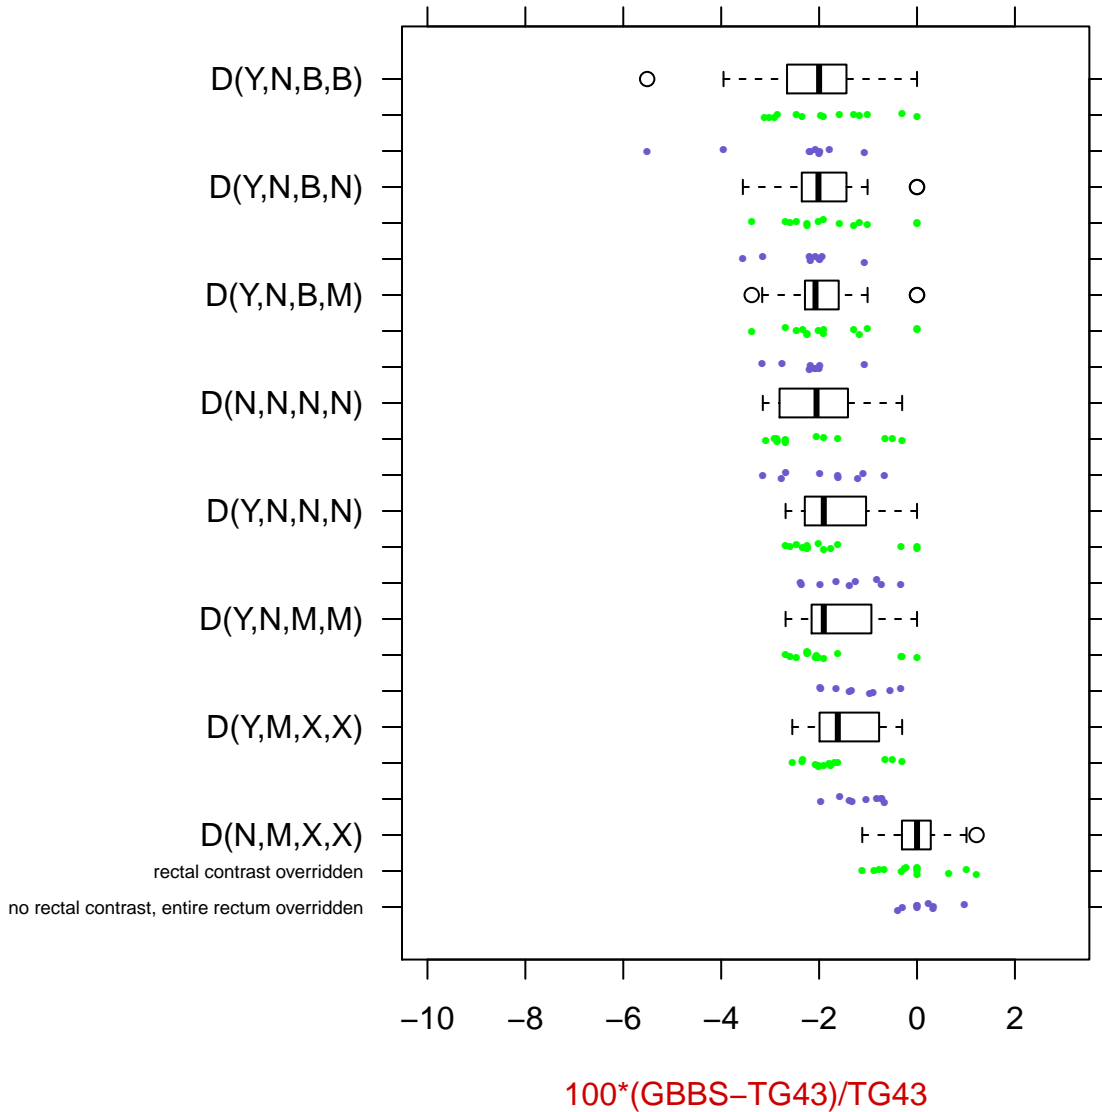

GBBS(solid model applicator, body, balloon & rectal contrast, packing contrast)

### balloon center

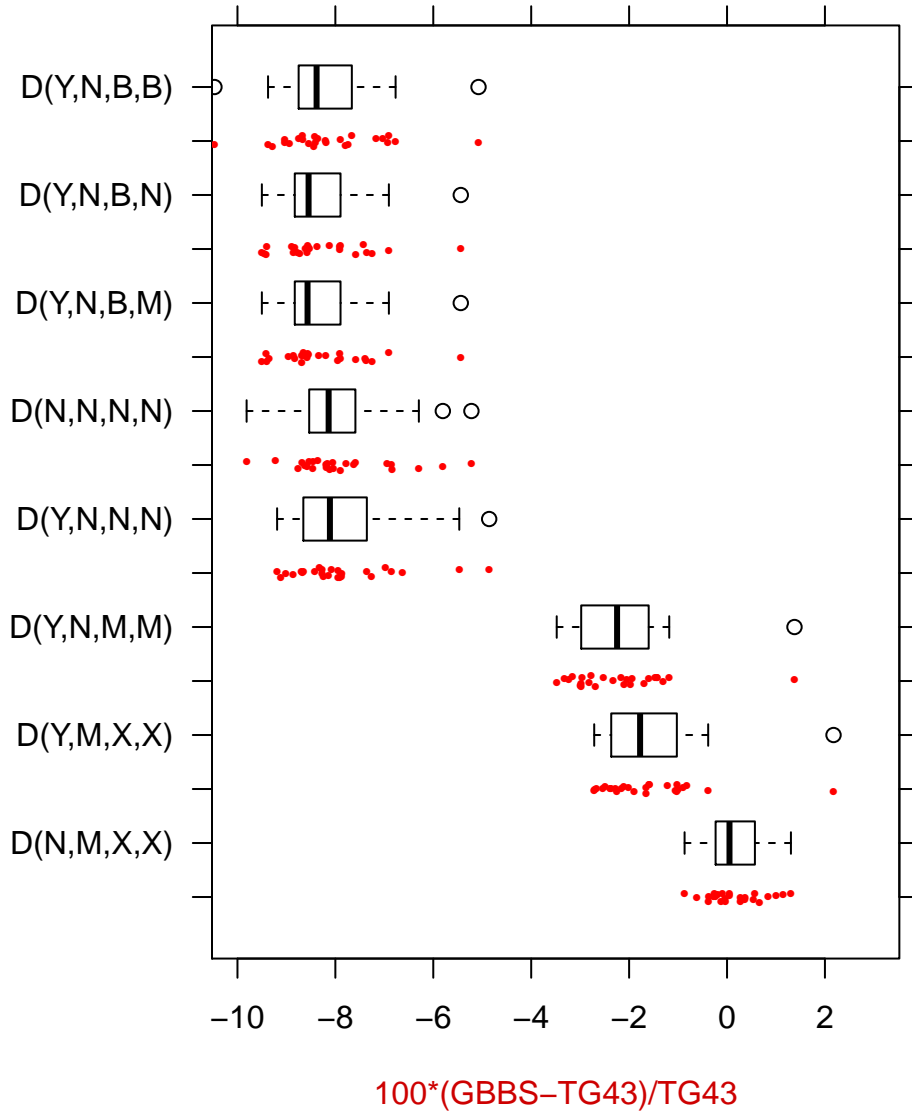

GBBS(solid model applicator, body, balloon & rectal contrast, packing contrast)

### balloon center

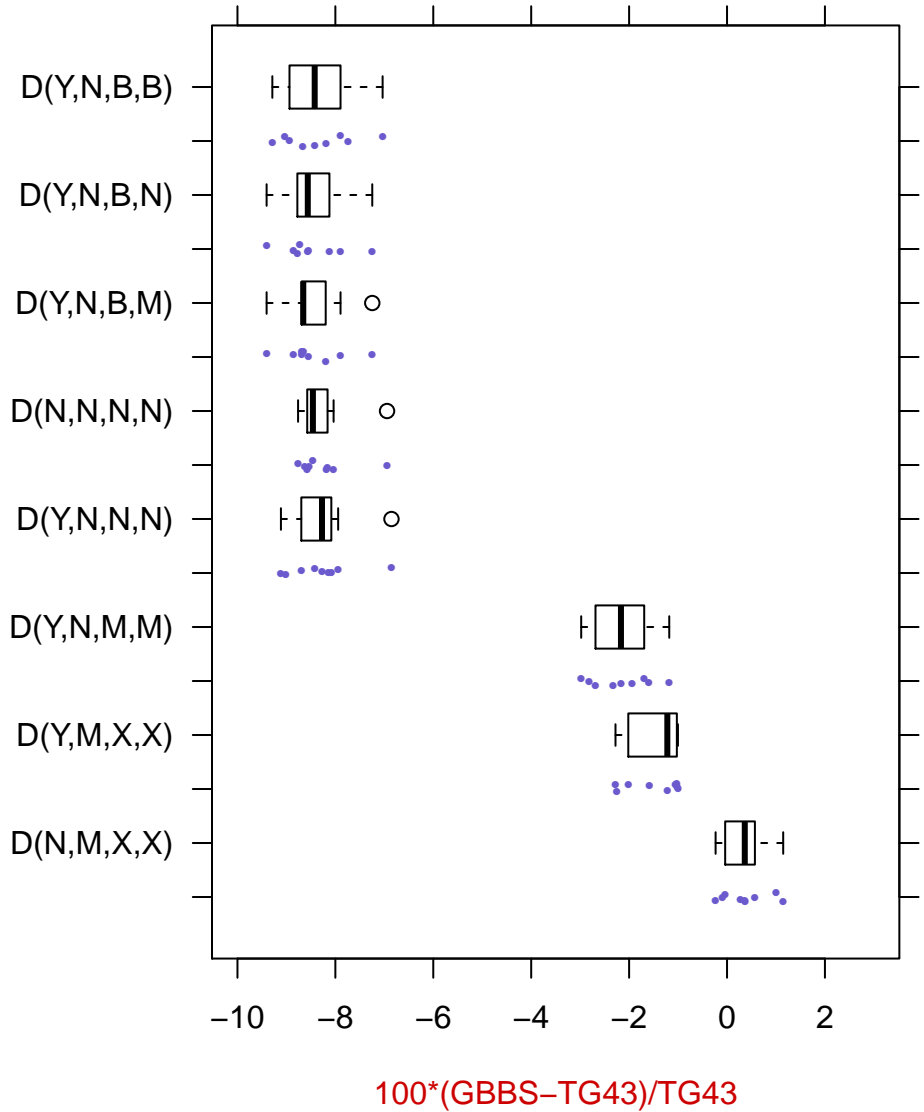

GBBS(solid model applicator, body, balloon & rectal contrast, packing contrast)

### balloon center

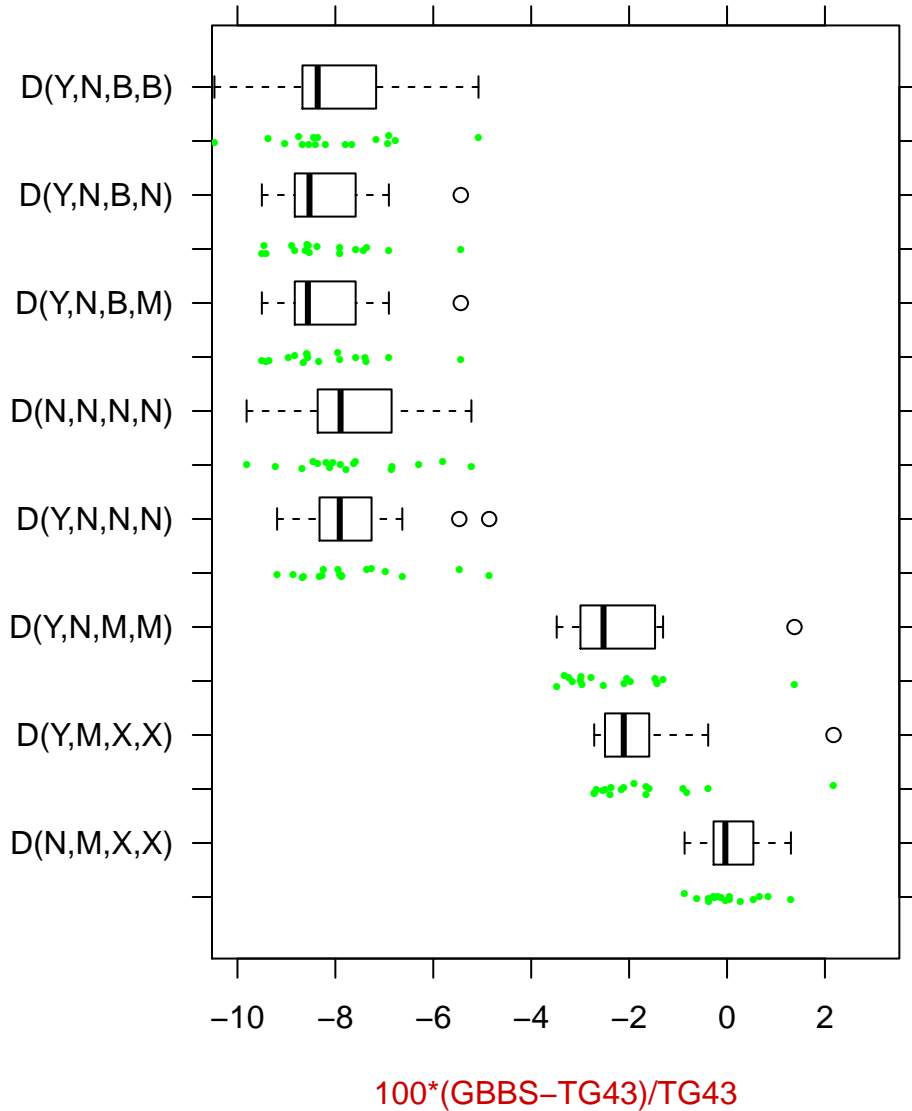



GBBS(solid model applicator, body, balloon & rectal contrast, packing contrast)

### balloon center

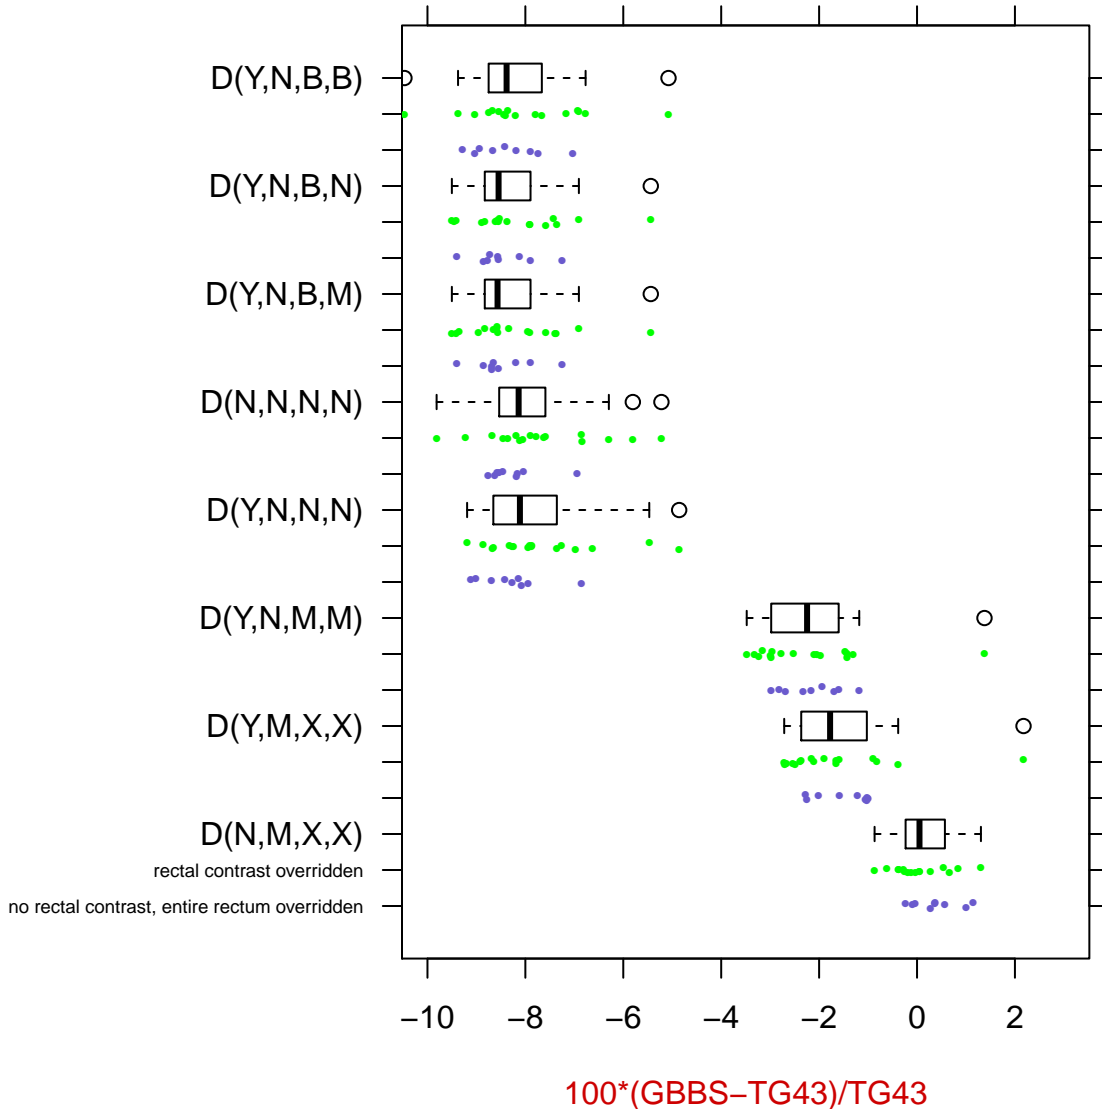

GBBS(solid model applicator, body, balloon & rectal contrast, packing contrast)

3 oclock

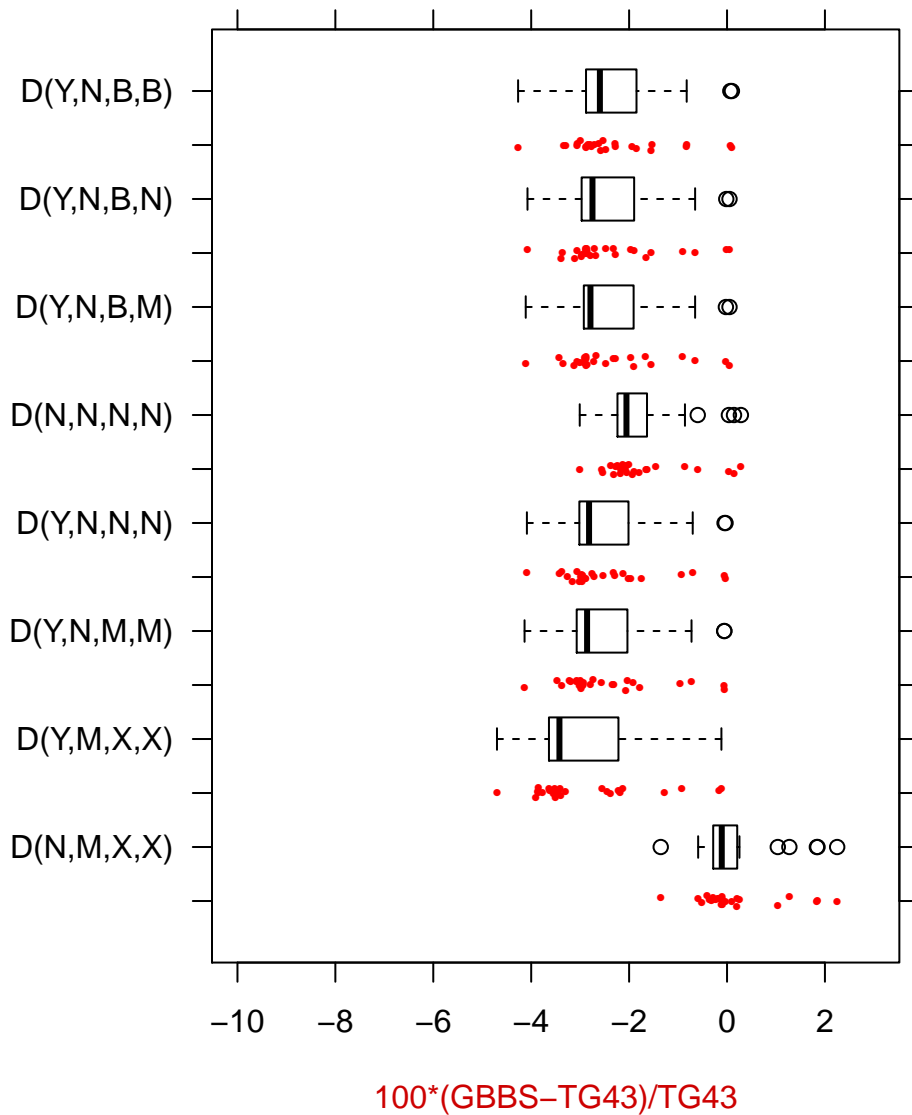

GBBS(solid model applicator, body, balloon & rectal contrast, packing contrast)

3 o'clock

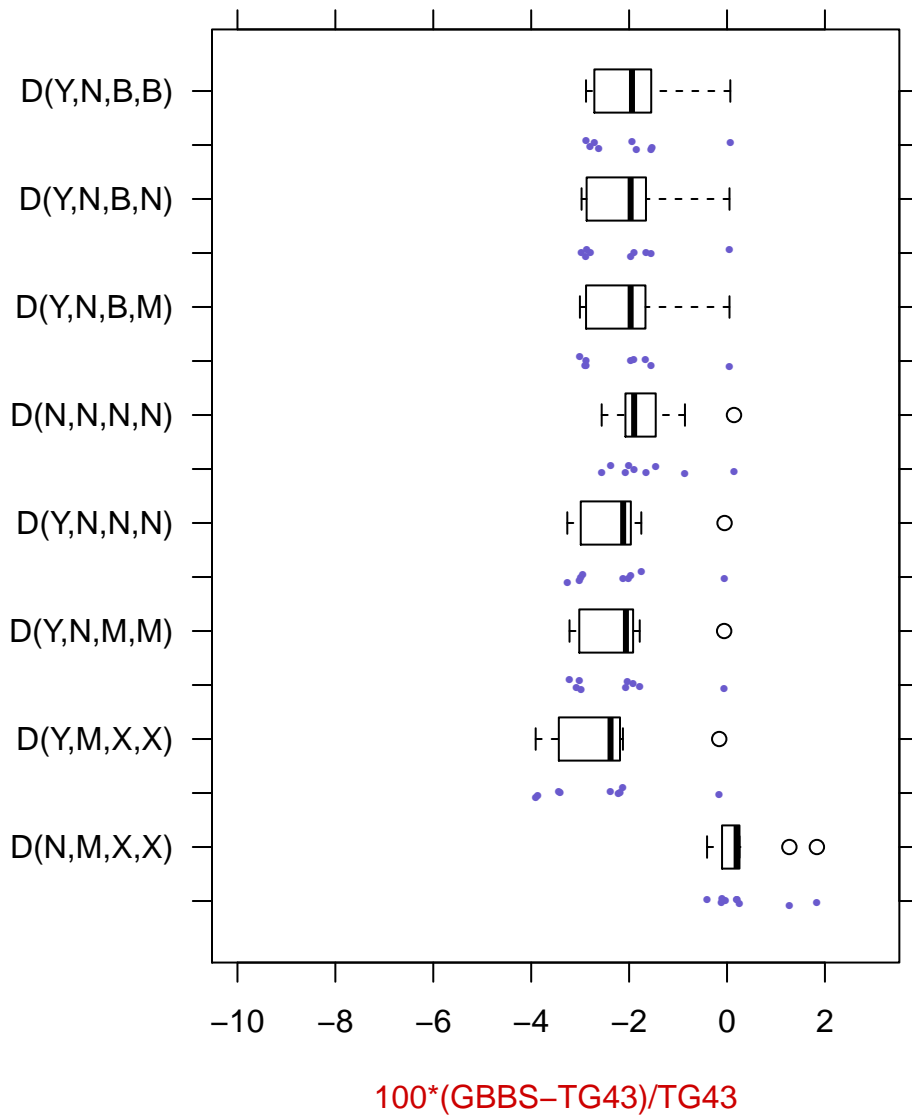

GBBS(solid model applicator, body, balloon & rectal contrast, packing contrast)

3 oclock

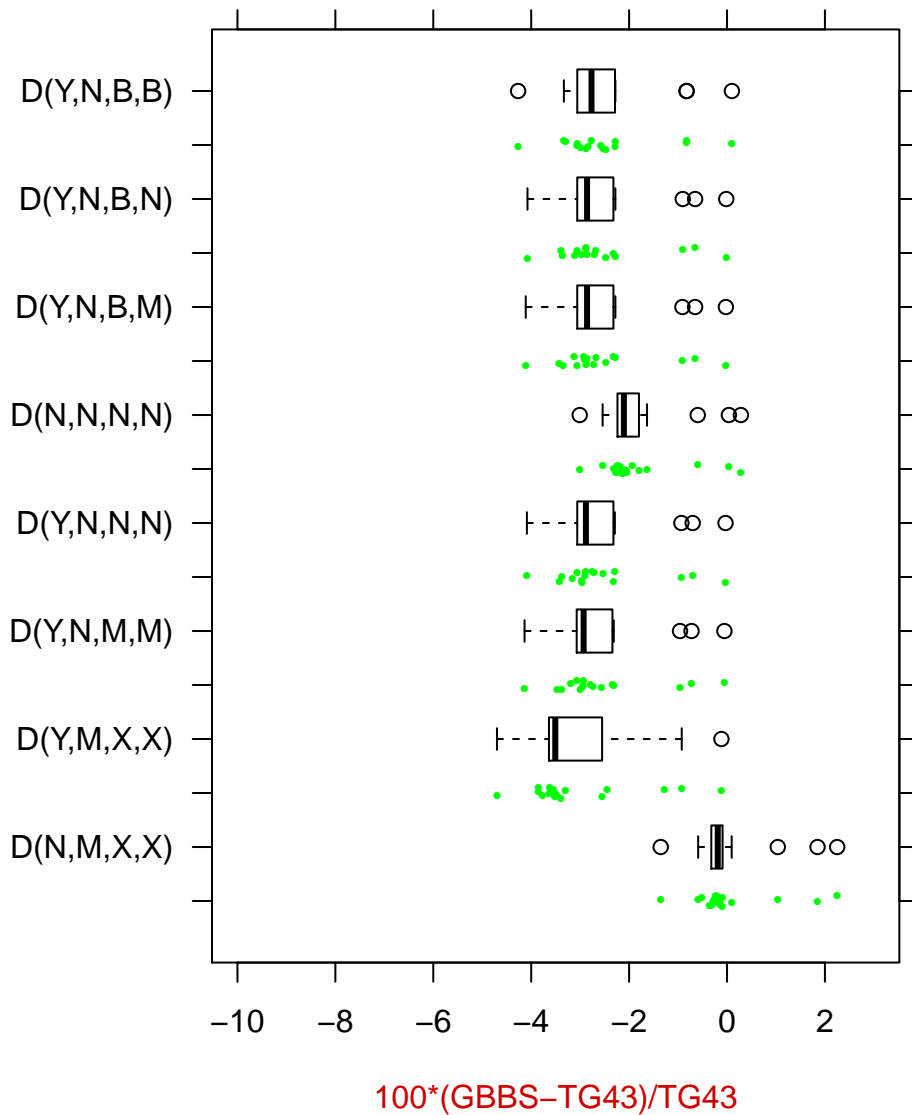

GBBS(solid model applicator, body, balloon & rectal contrast, packing contrast)

3 o'clock

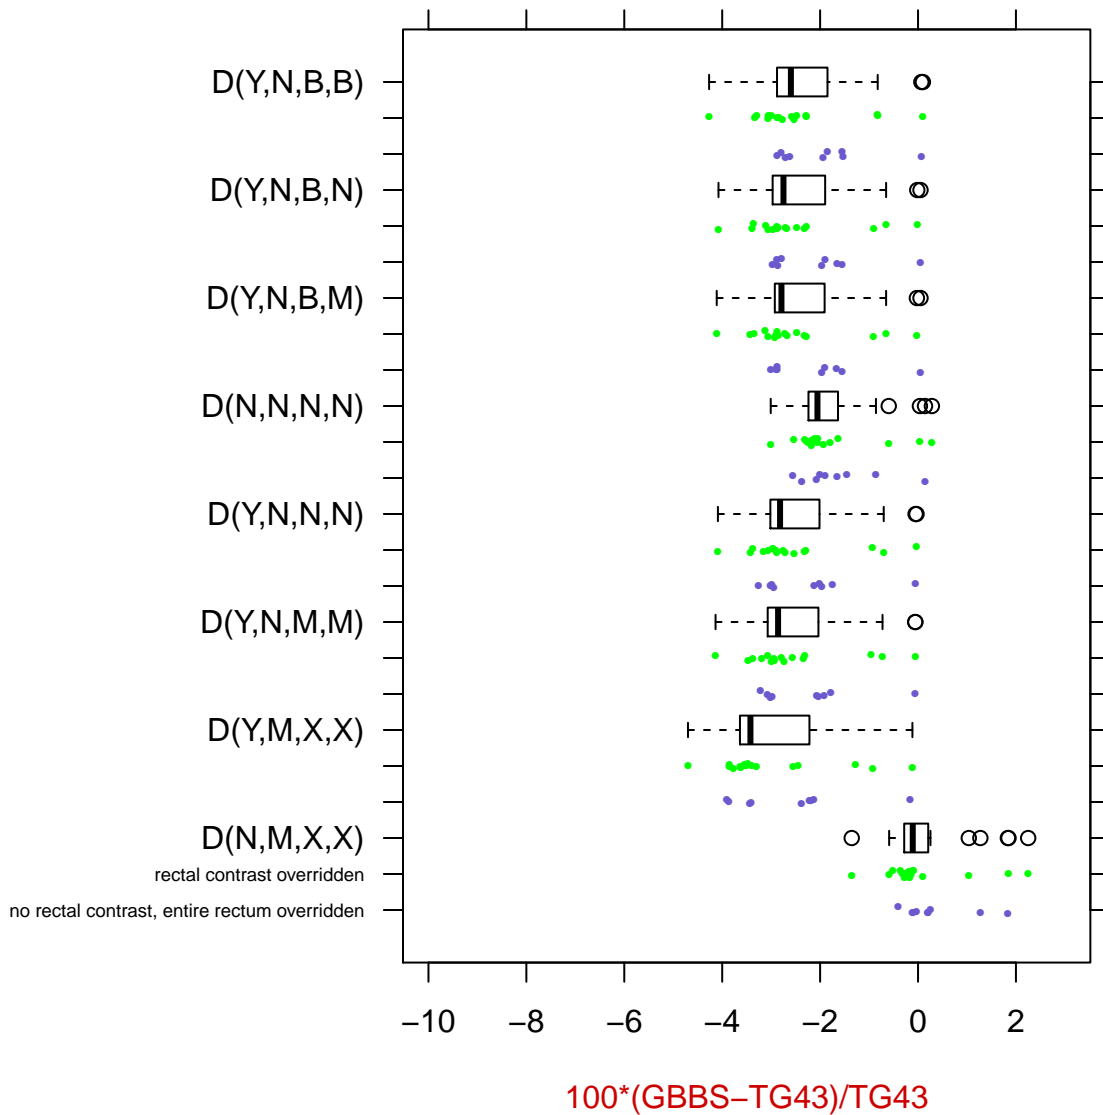

GBBS(solid model applicator, body, balloon & rectal contrast, packing contrast)

9 oclock

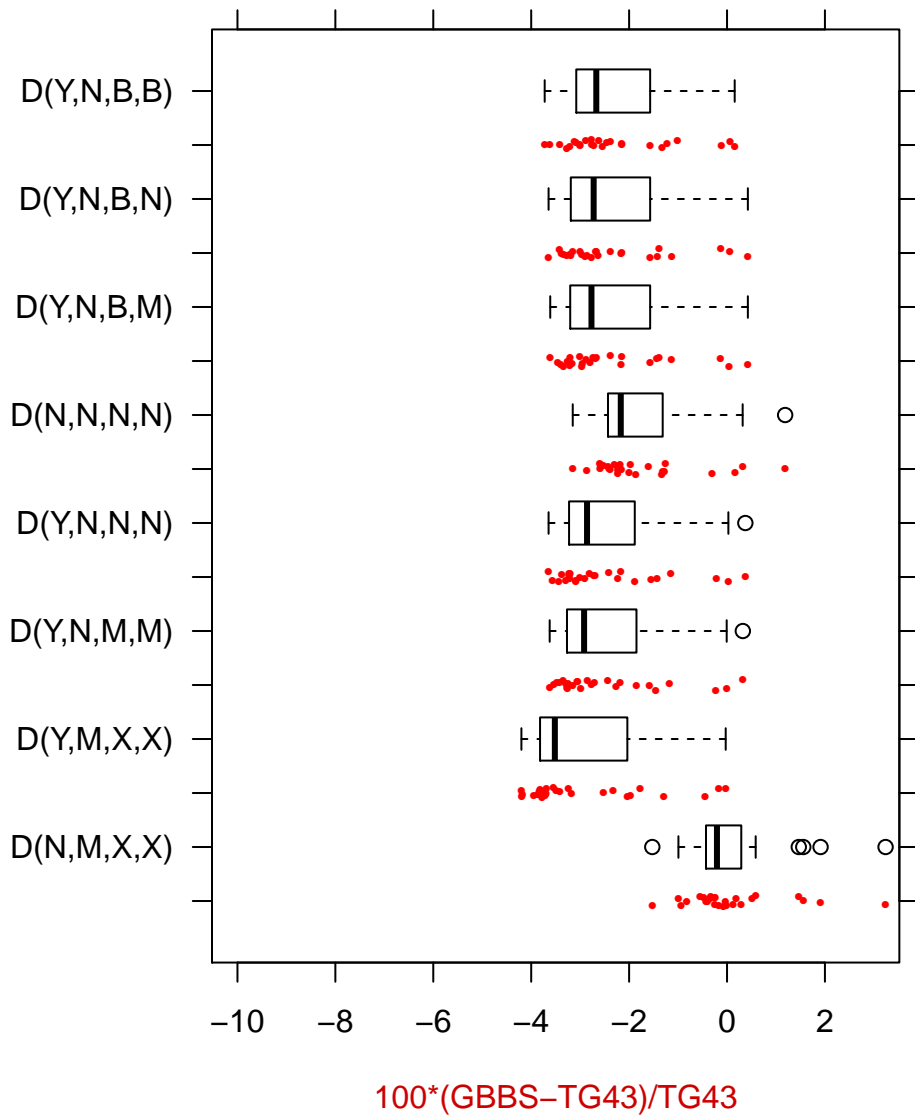

GBBS(solid model applicator, body, balloon & rectal contrast, packing contrast)

9 o'clock

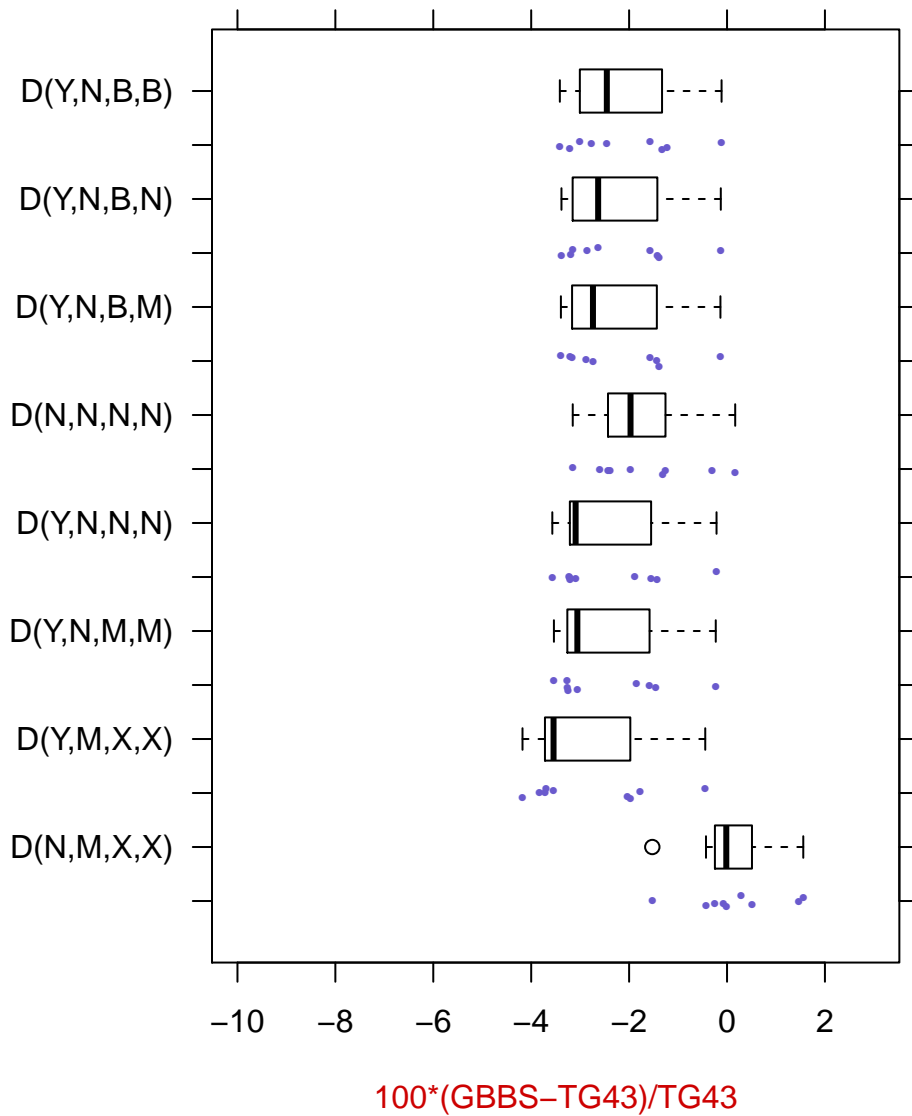

GBBS(solid model applicator, body, balloon & rectal contrast, packing contrast)

9 oclock

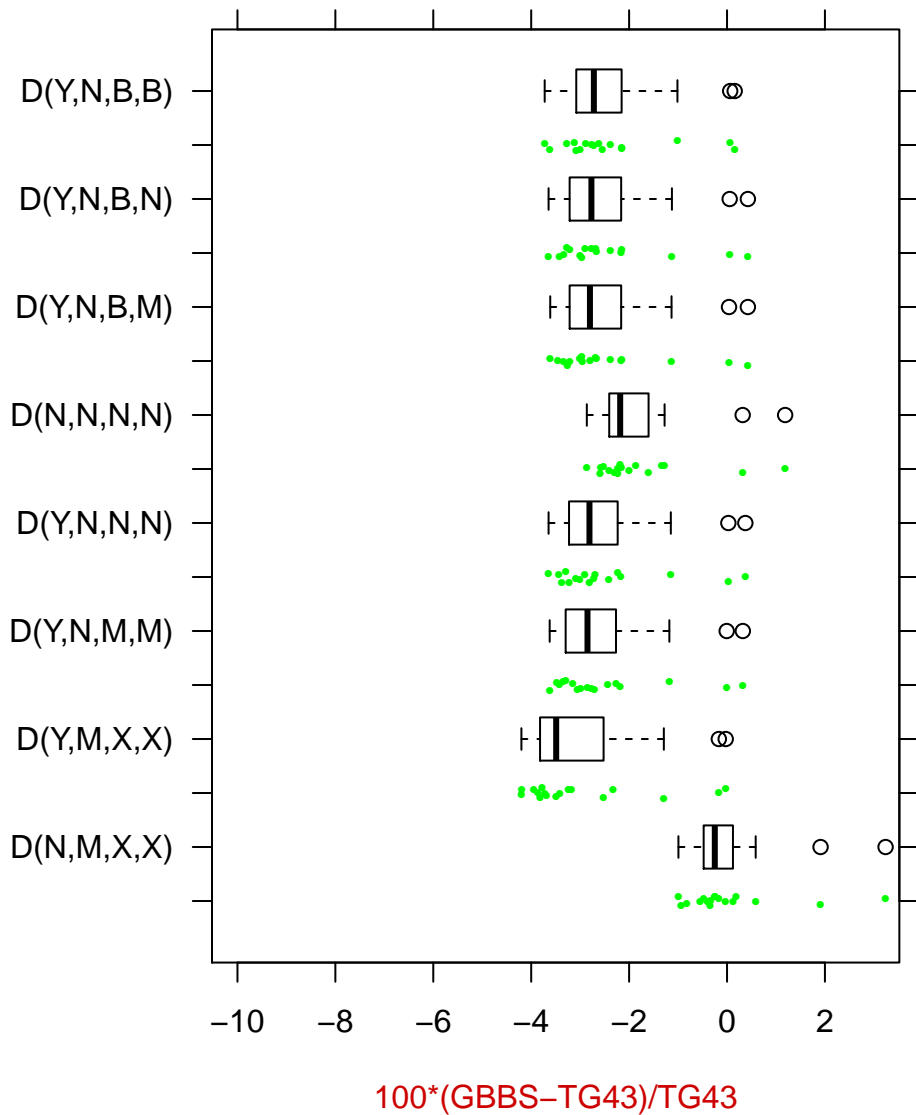



GBBS(solid model applicator, body, balloon & rectal contrast, packing contrast)

9 o'clock

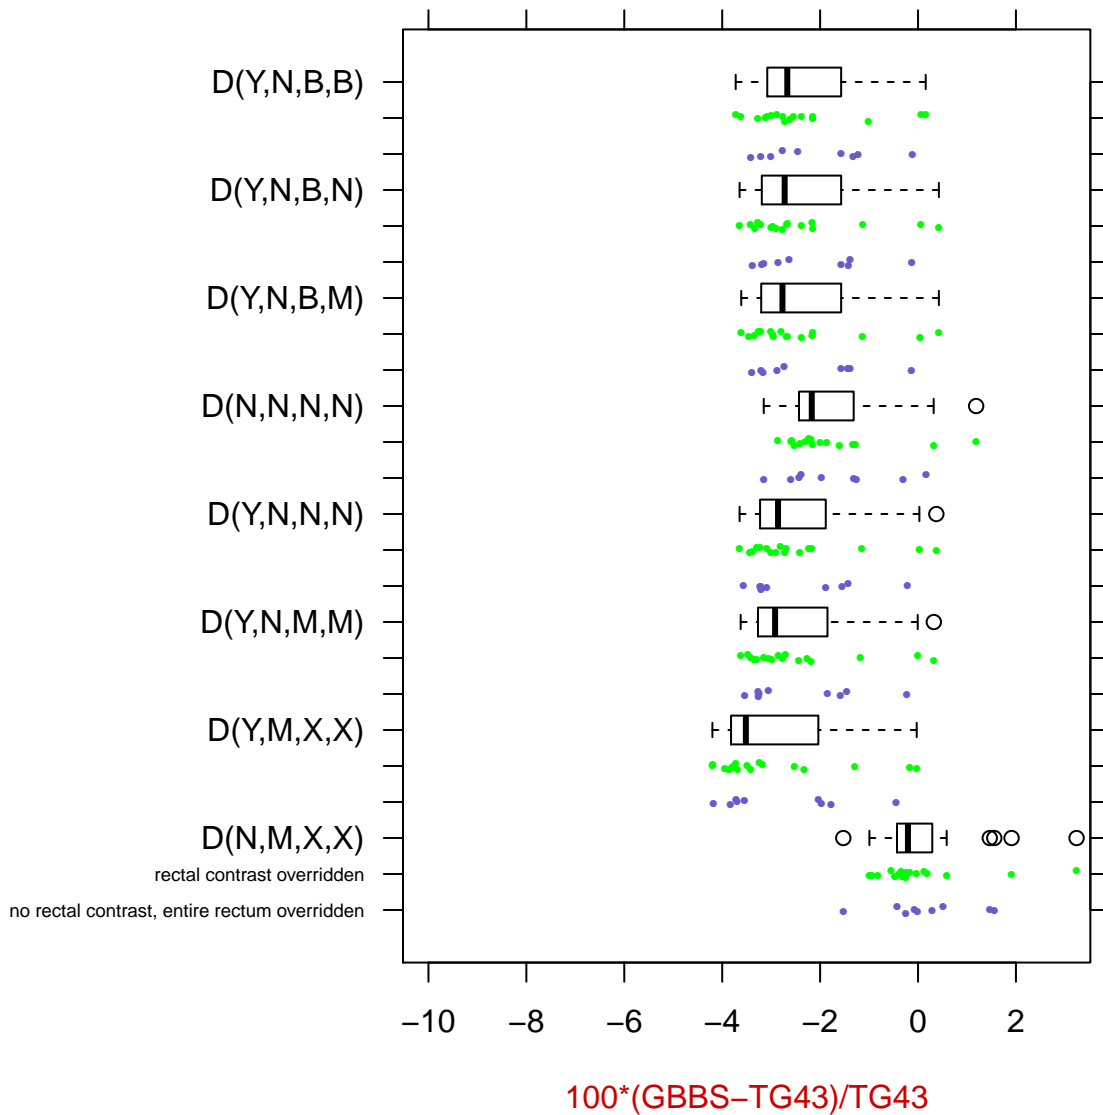

Supplement: NIHMS539658-supplement-01.pdf [file NIHMS539658-supplement-01.pdf]
