# Supplementary material
Source: PubMed Central journal article supplement (PMC3955059)

# Contribution of factors to differences between D(Y,N,N,N) and TG-43: A left

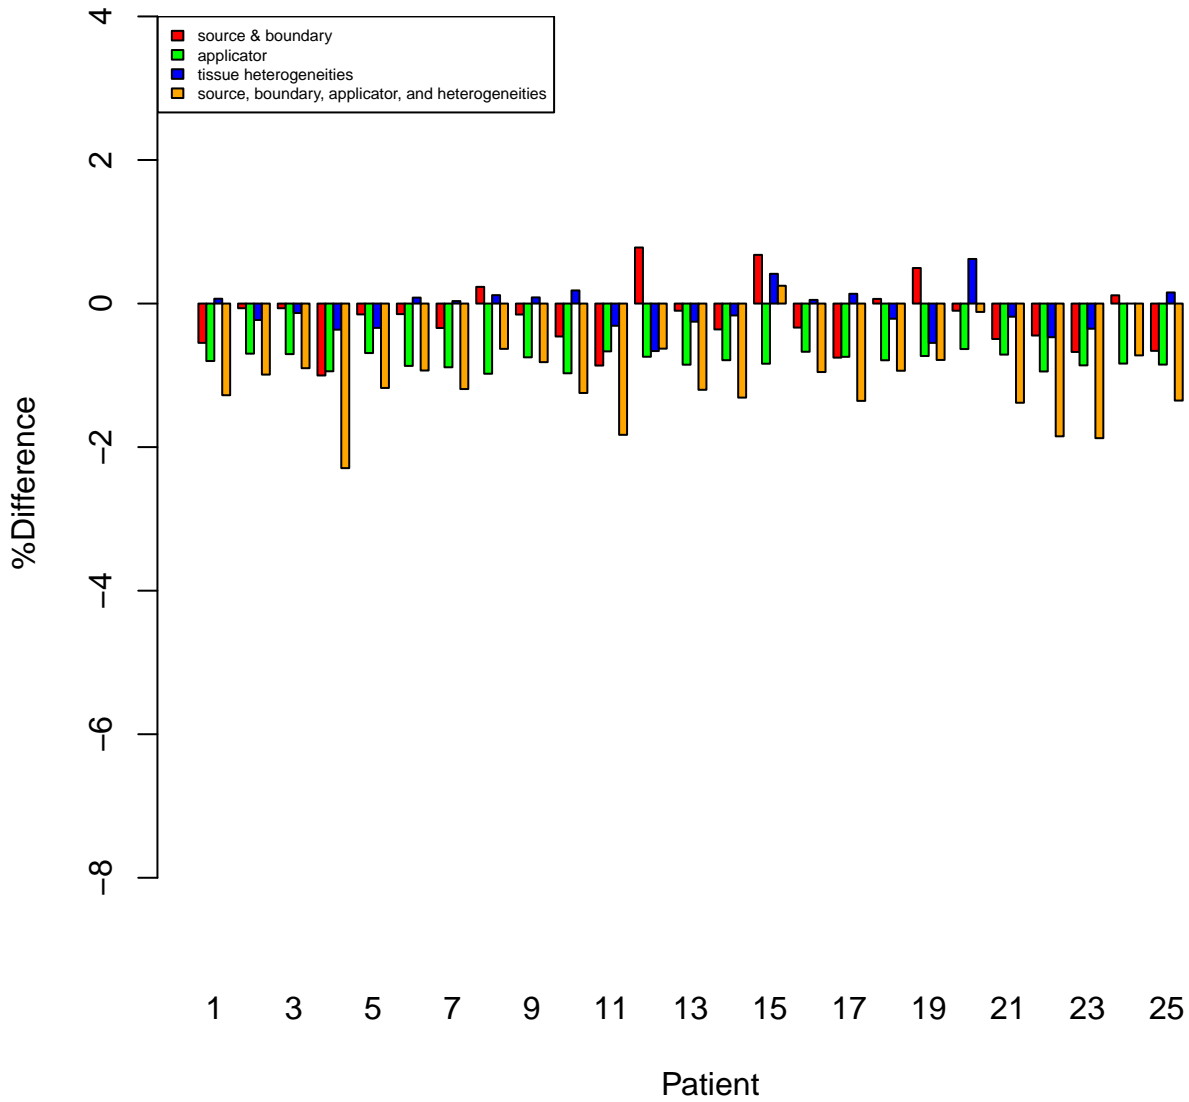

# Contribution of factors to differences between D(Y,N,N,N) and TG-43: A right

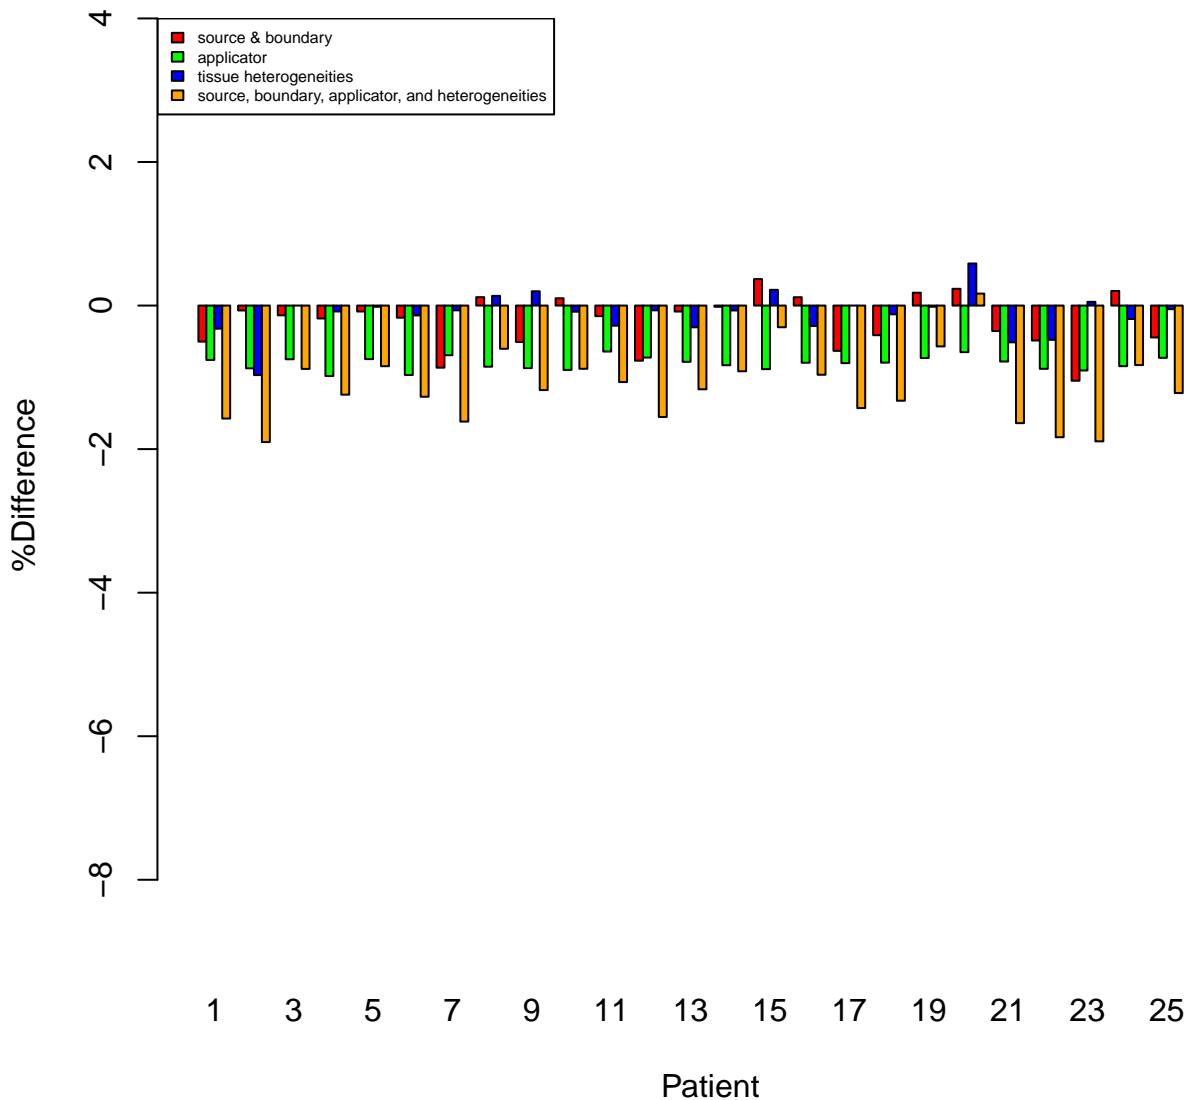

# Contribution of factors to differences between D(Y,N,N,N) and TG-43: B left

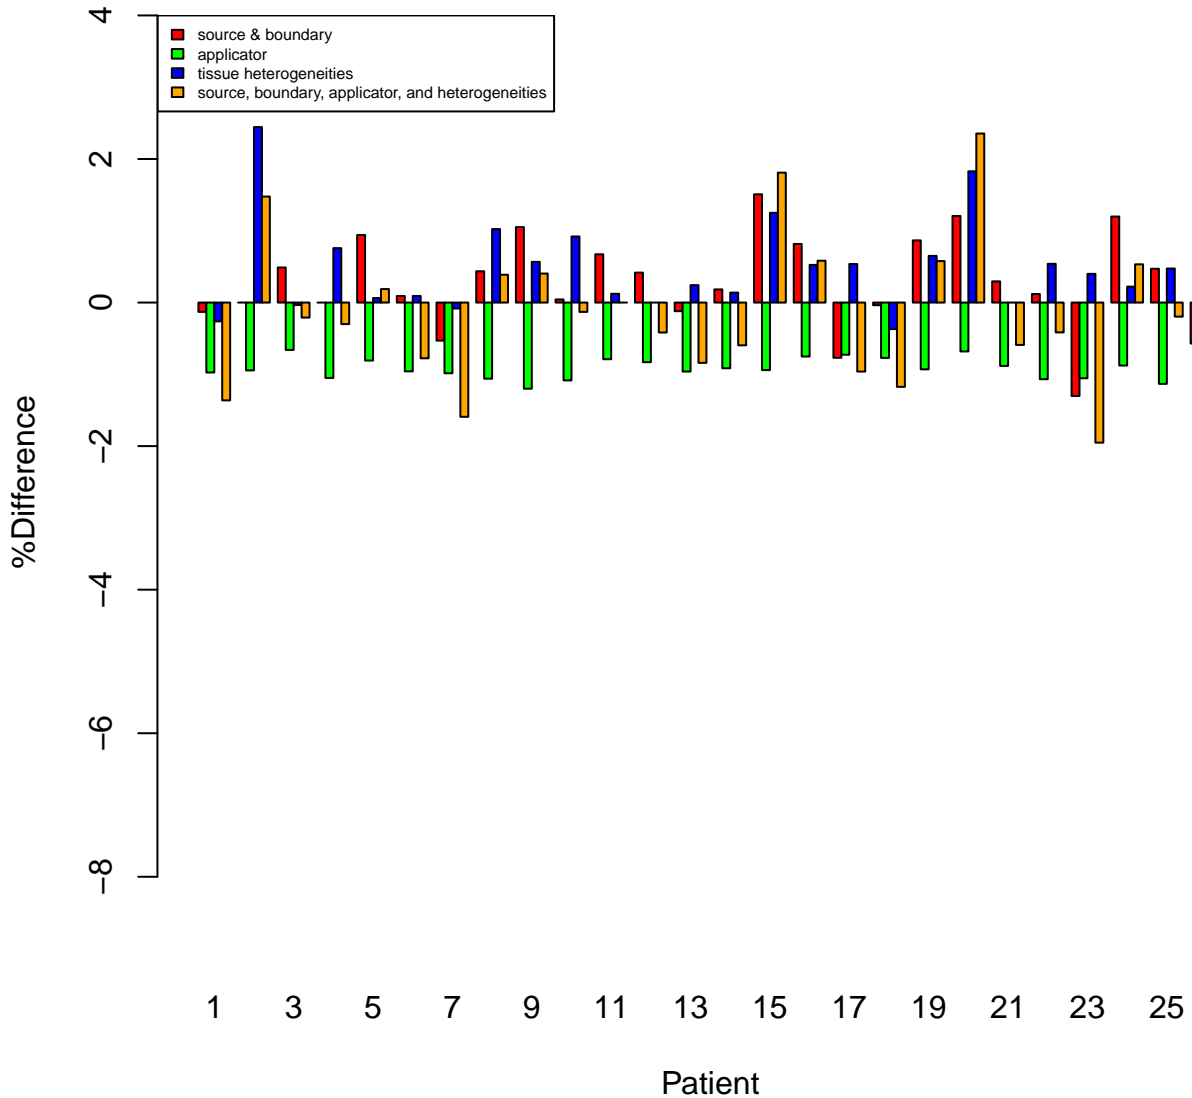

# Contribution of factors to differences between D(Y,N,N,N) and TG-43: B right

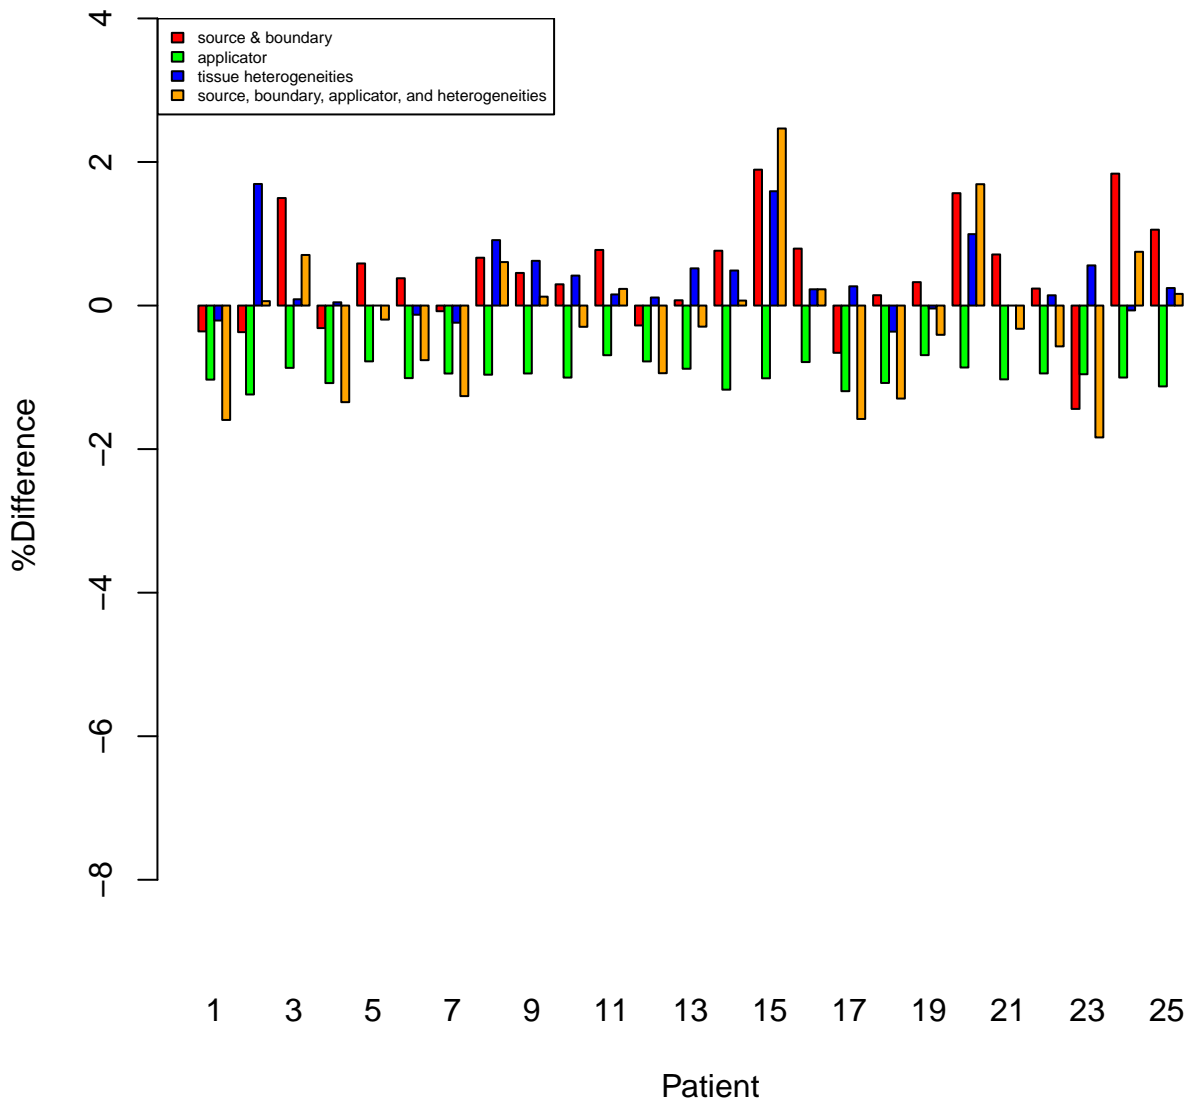

# Contribution of factors to differences between D(Y,N,N,N) and TG-43: ICRU bladder

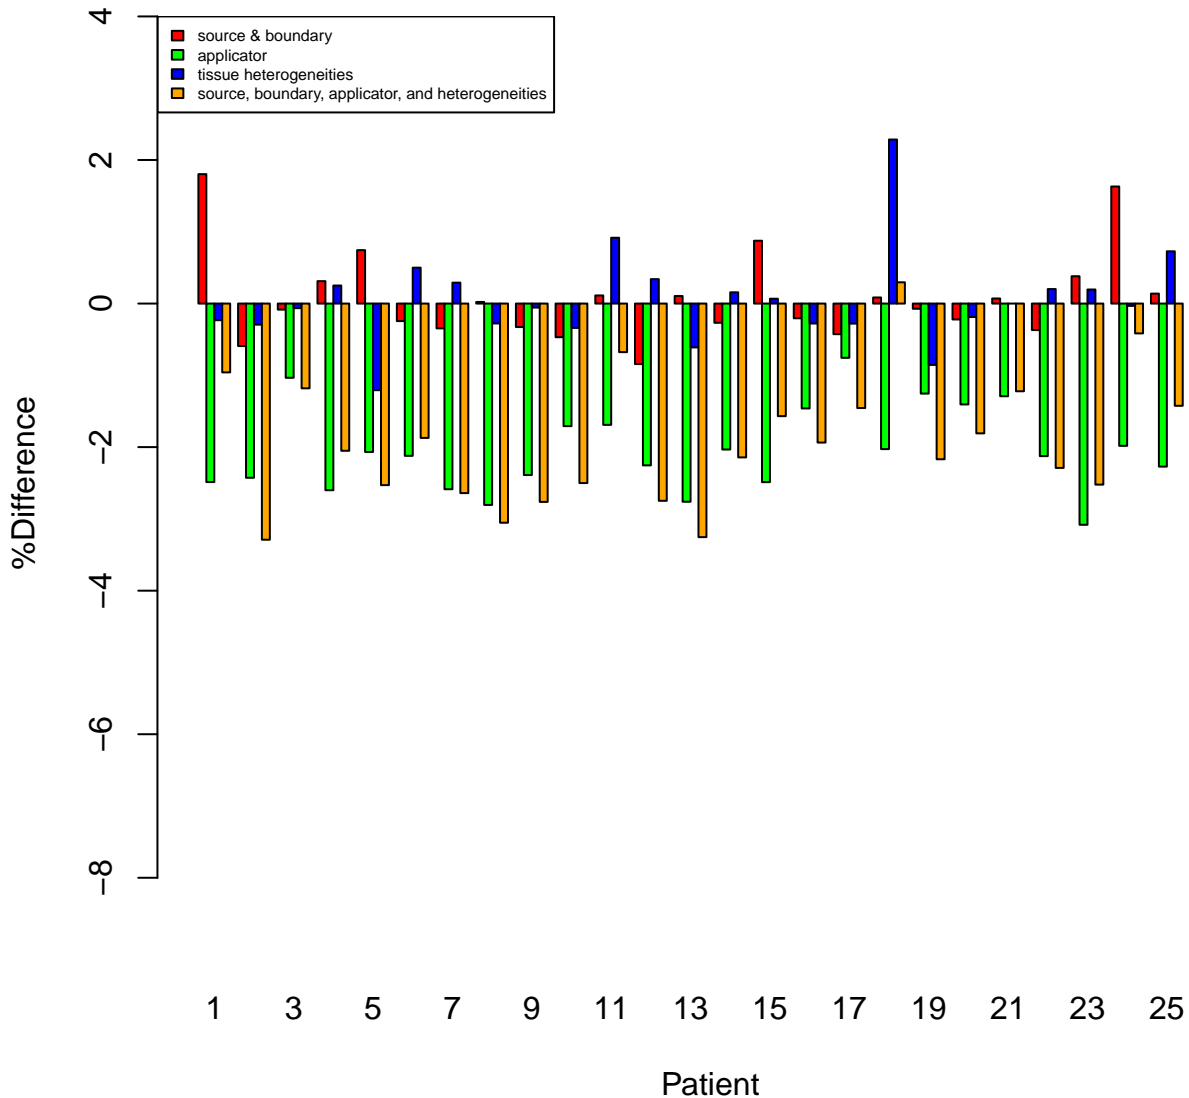

# Contribution of factors to differences between D(Y,N,N,N) and TG-43: ICRU rectum

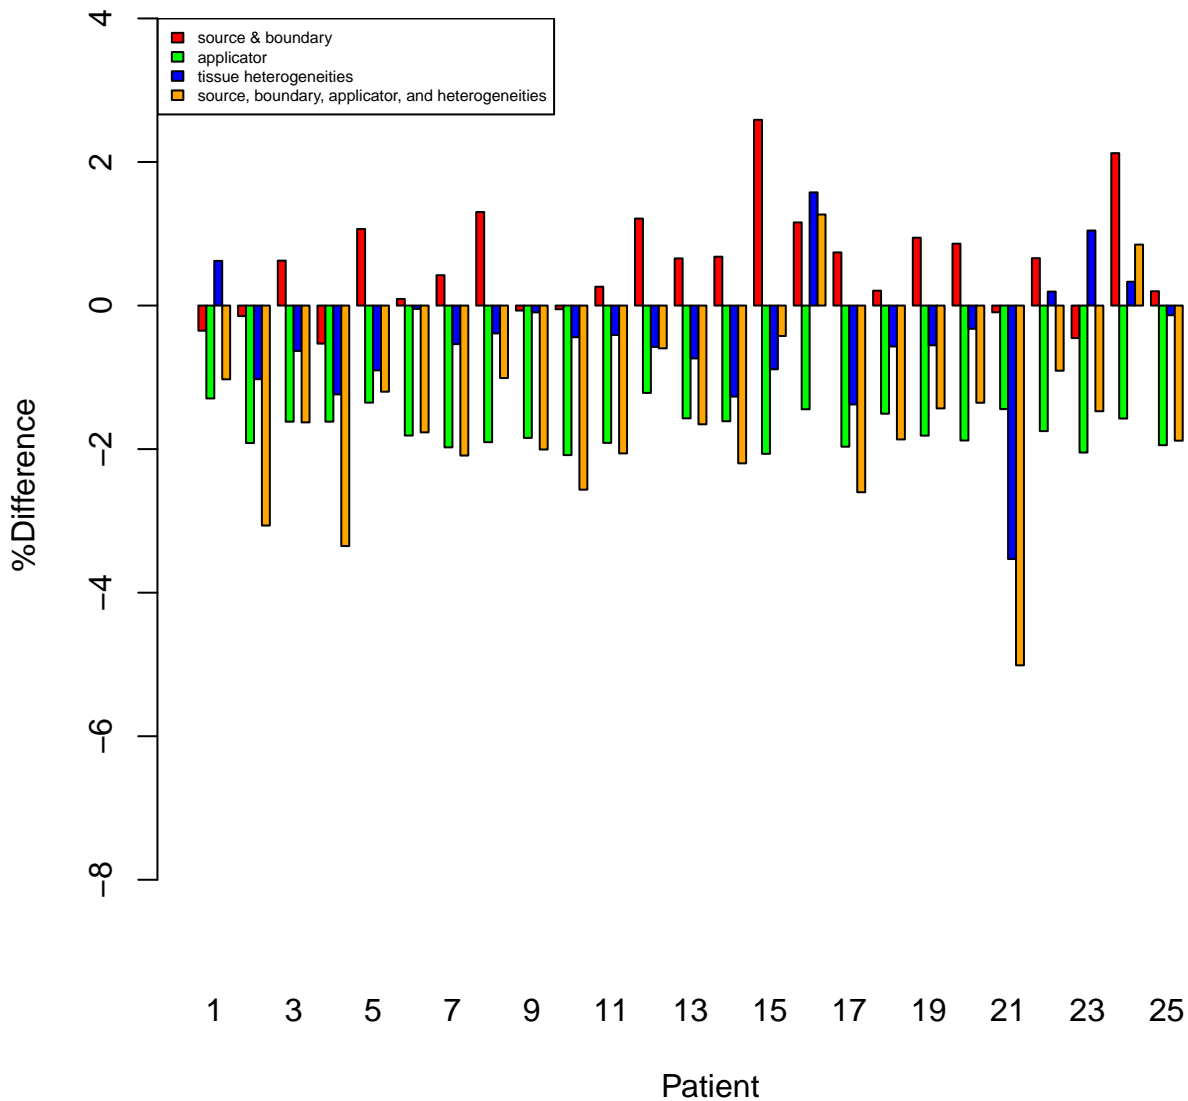

# Contribution of factors to differences between D(Y,N,N,N) and TG-43: D2cc bladder

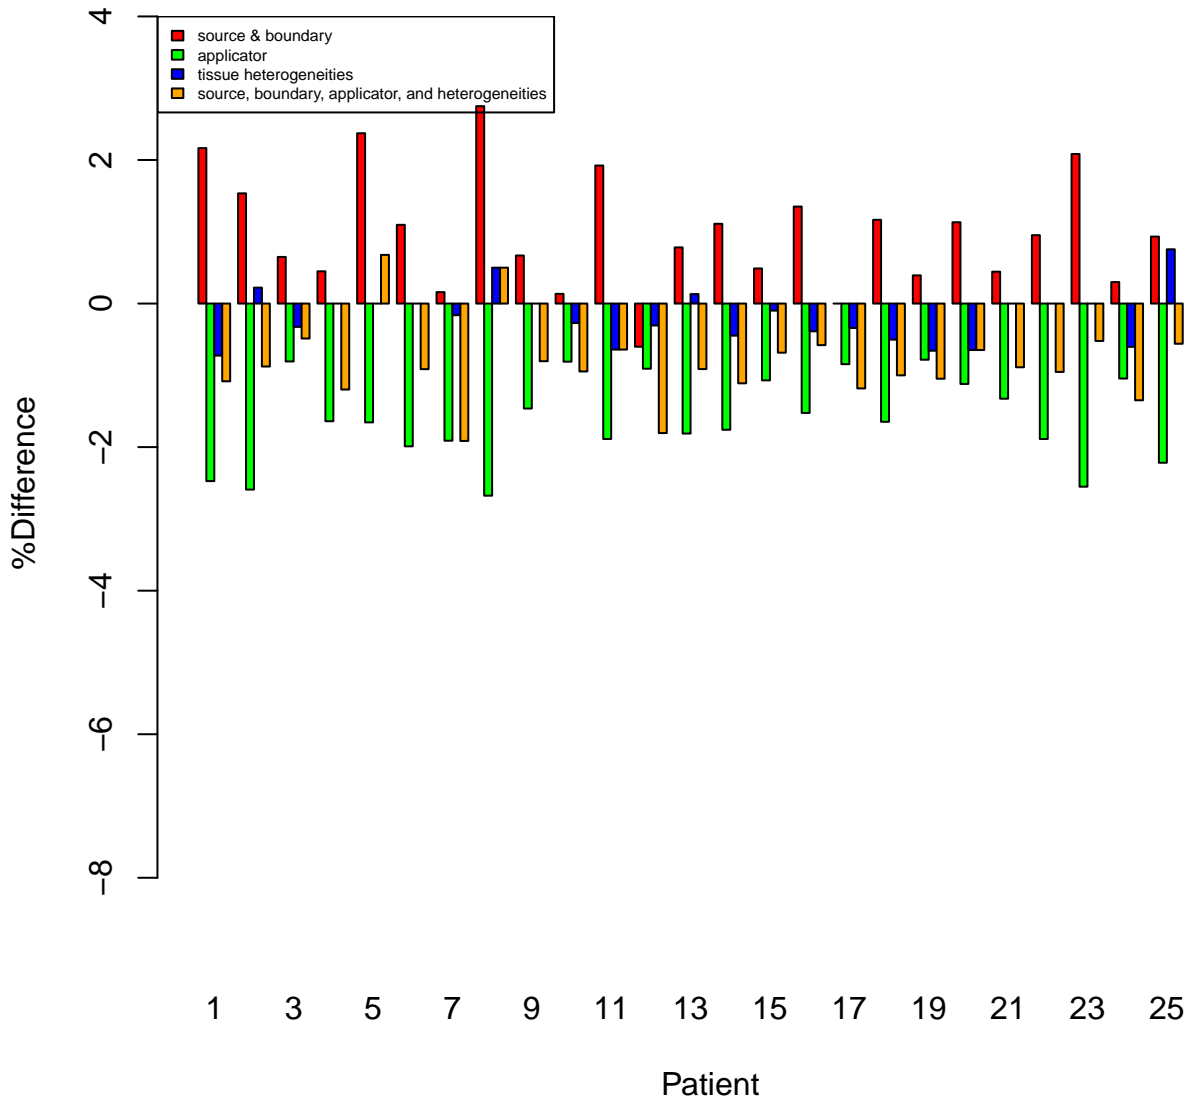

# Contribution of factors to differences between D(Y,N,N,N) and TG-43: D2cc rectum

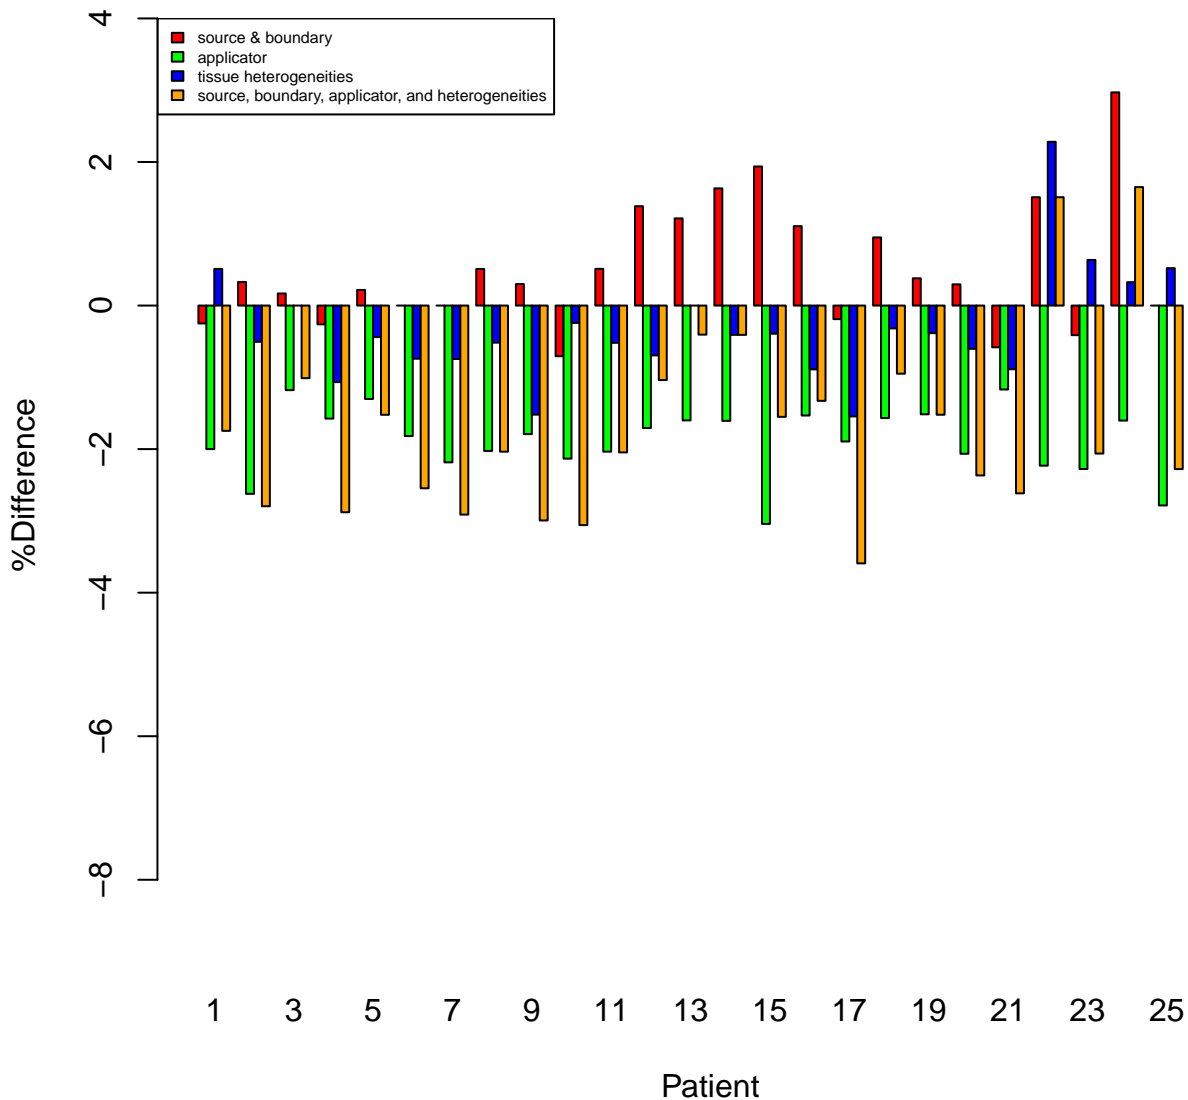



# Contribution of factors to differences between D(Y,N,N,N) and TG-43: D2cc sigmoid

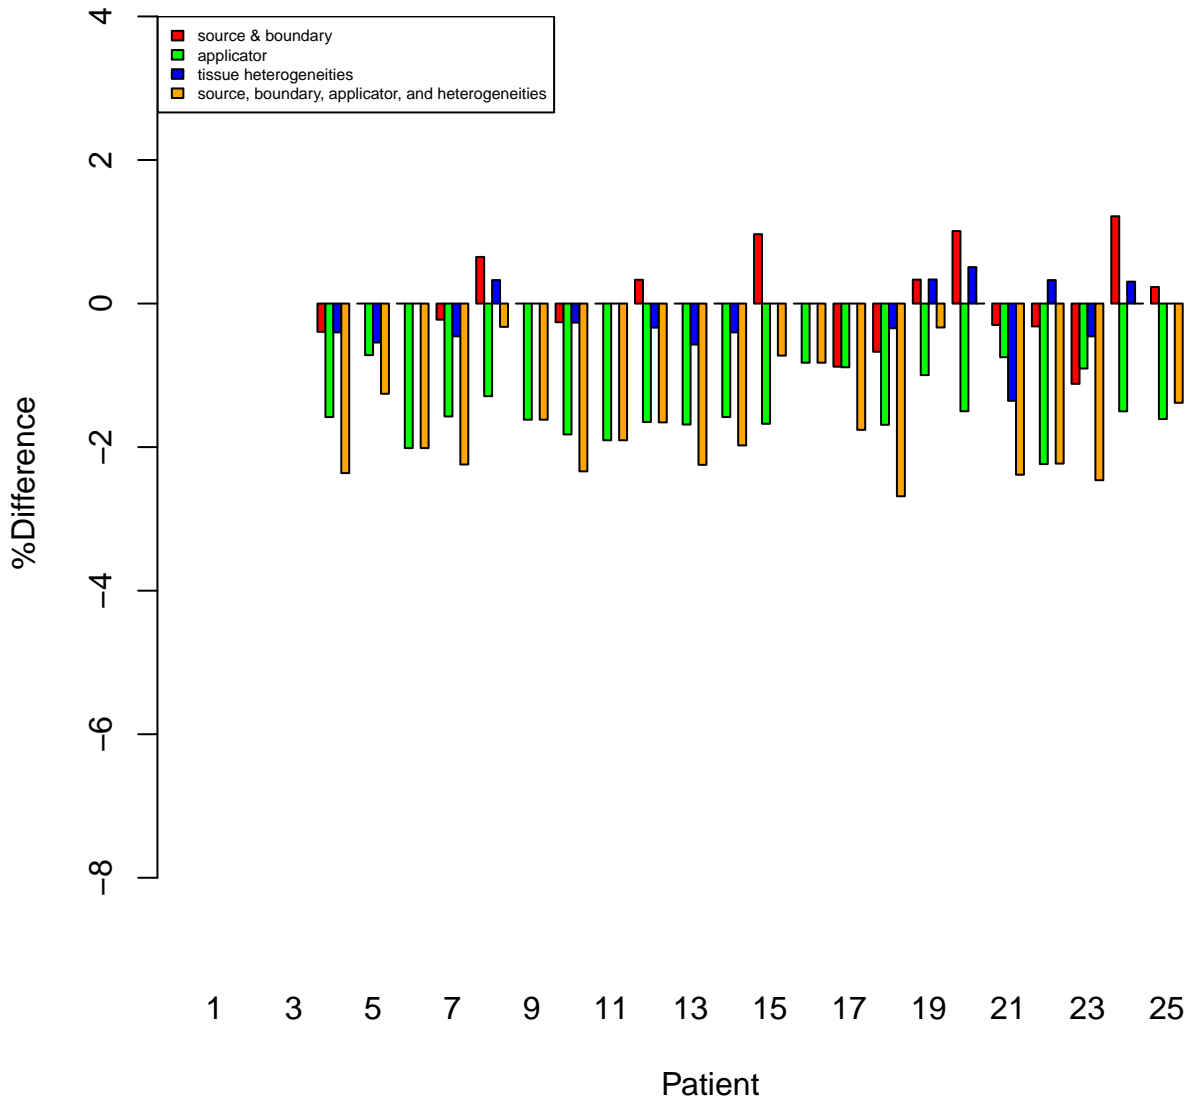

# Contribution of factors to differences between D(Y,N,N,N) and TG-43: balloon center

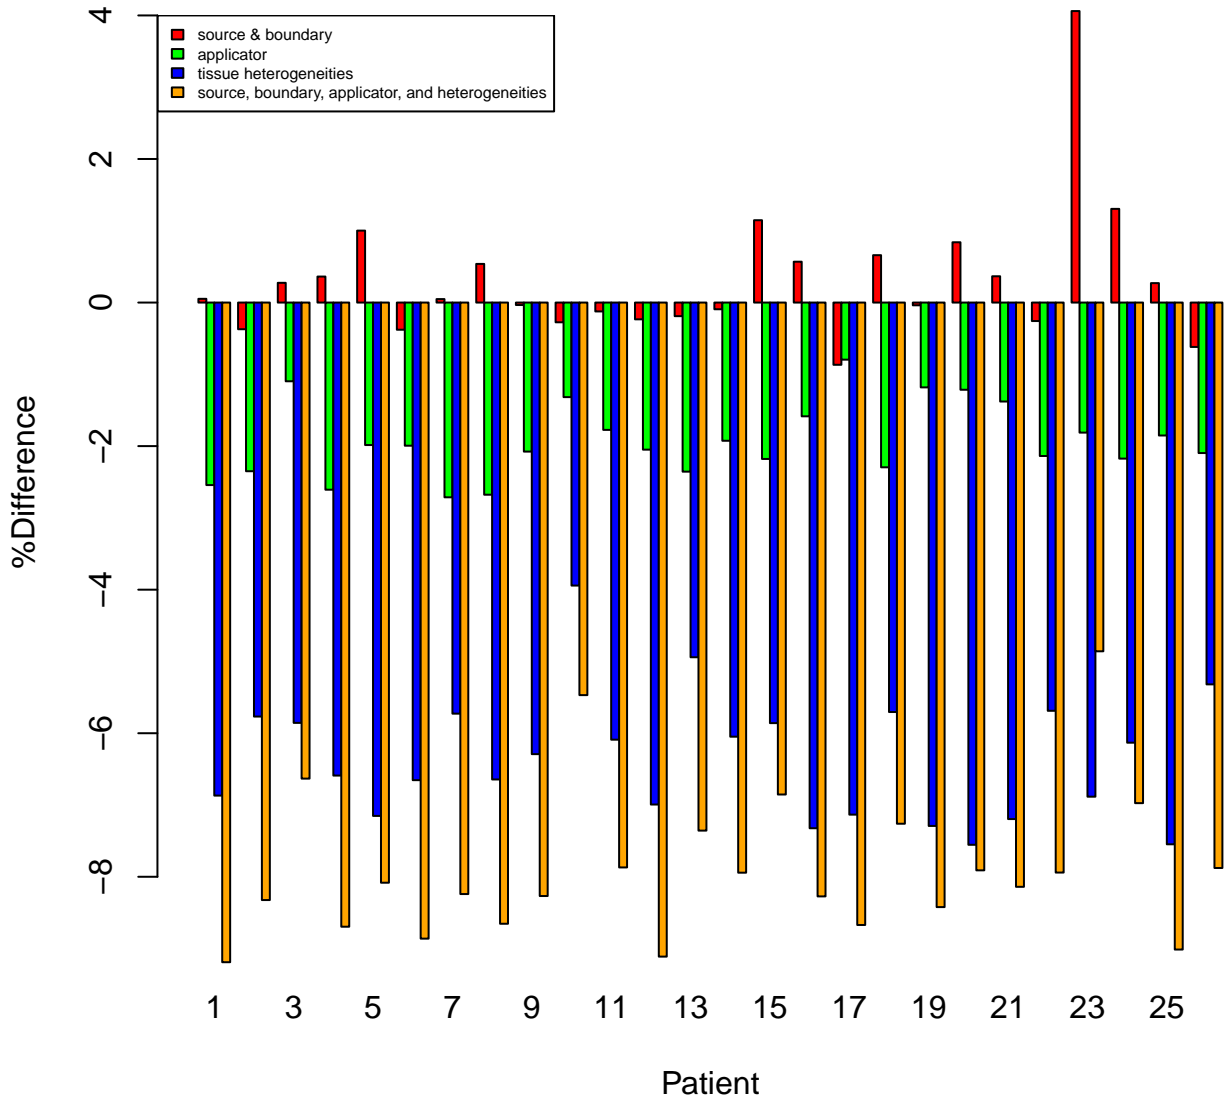

# Contribution of factors to differences between D(Y,N,N,N) and TG-43: 3 oclock

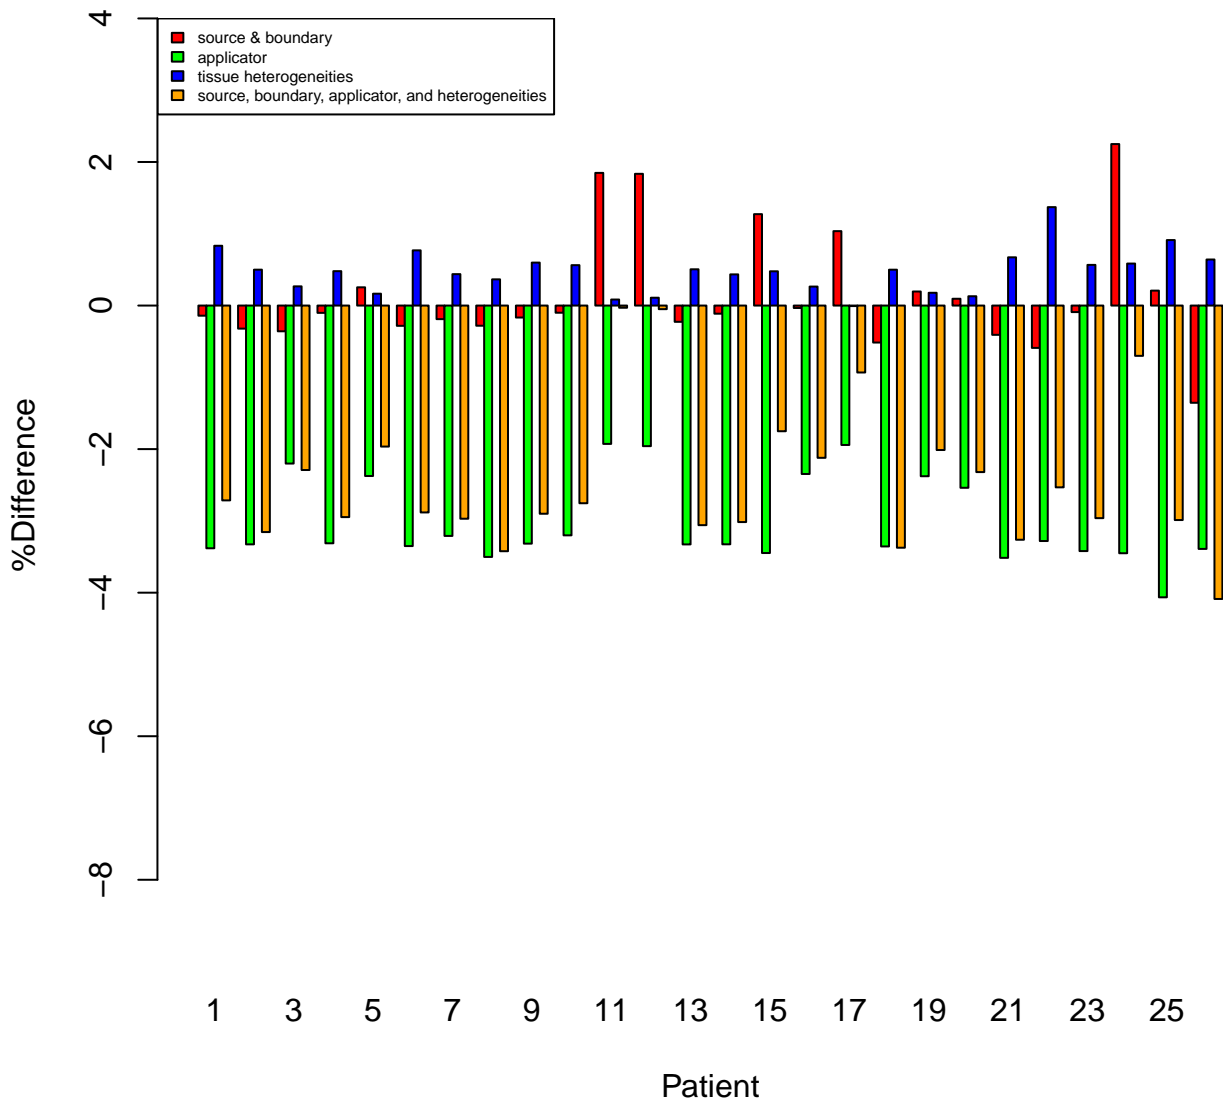

# Contribution of factors to differences between D(Y,N,N,N) and TG-43: 9 o'clock

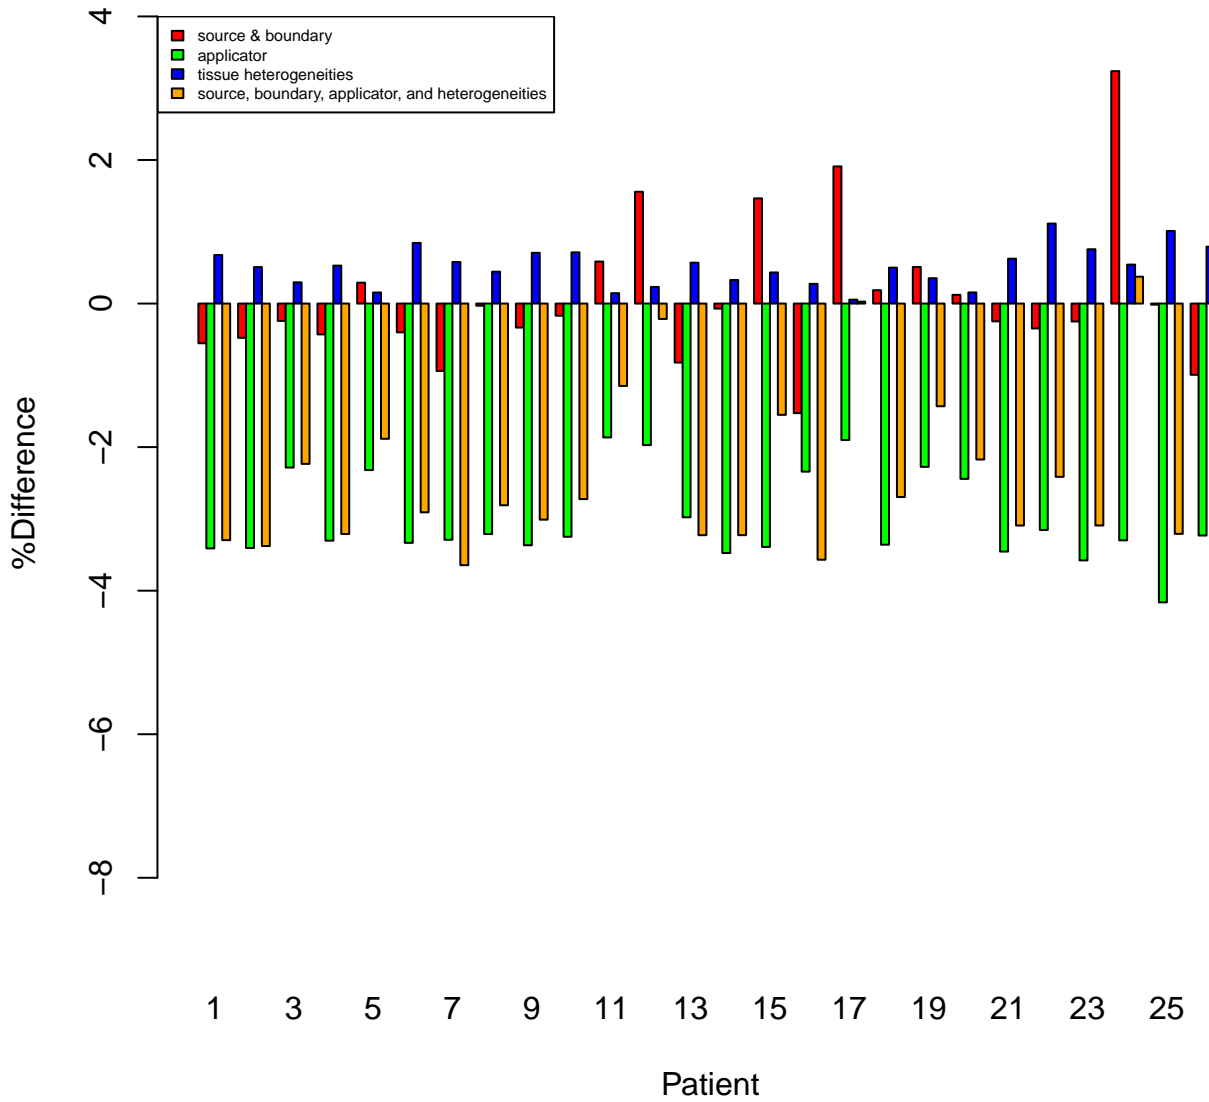

Supplement: NIHMS539658-supplement-07.pdf [file NIHMS539658-supplement-07.pdf]
