# Supplementary material
Source: PubMed Central journal article supplement (PMC3955059)

# Impact of tissue heterogeneities with different contrast to material mapping: A left

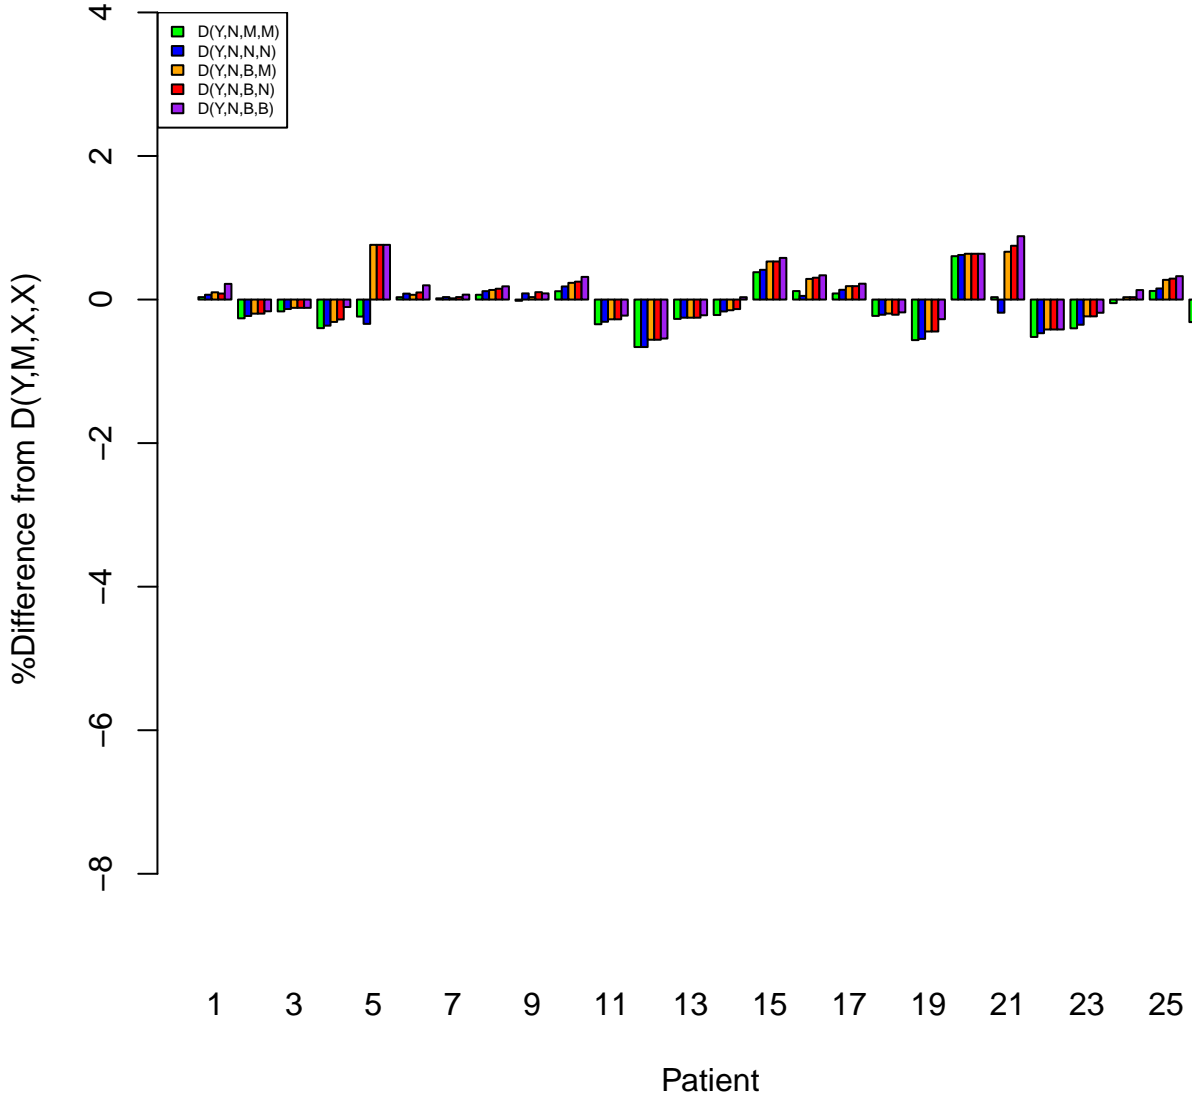

# Impact of tissue heterogeneities with different contrast to material mapping: A right

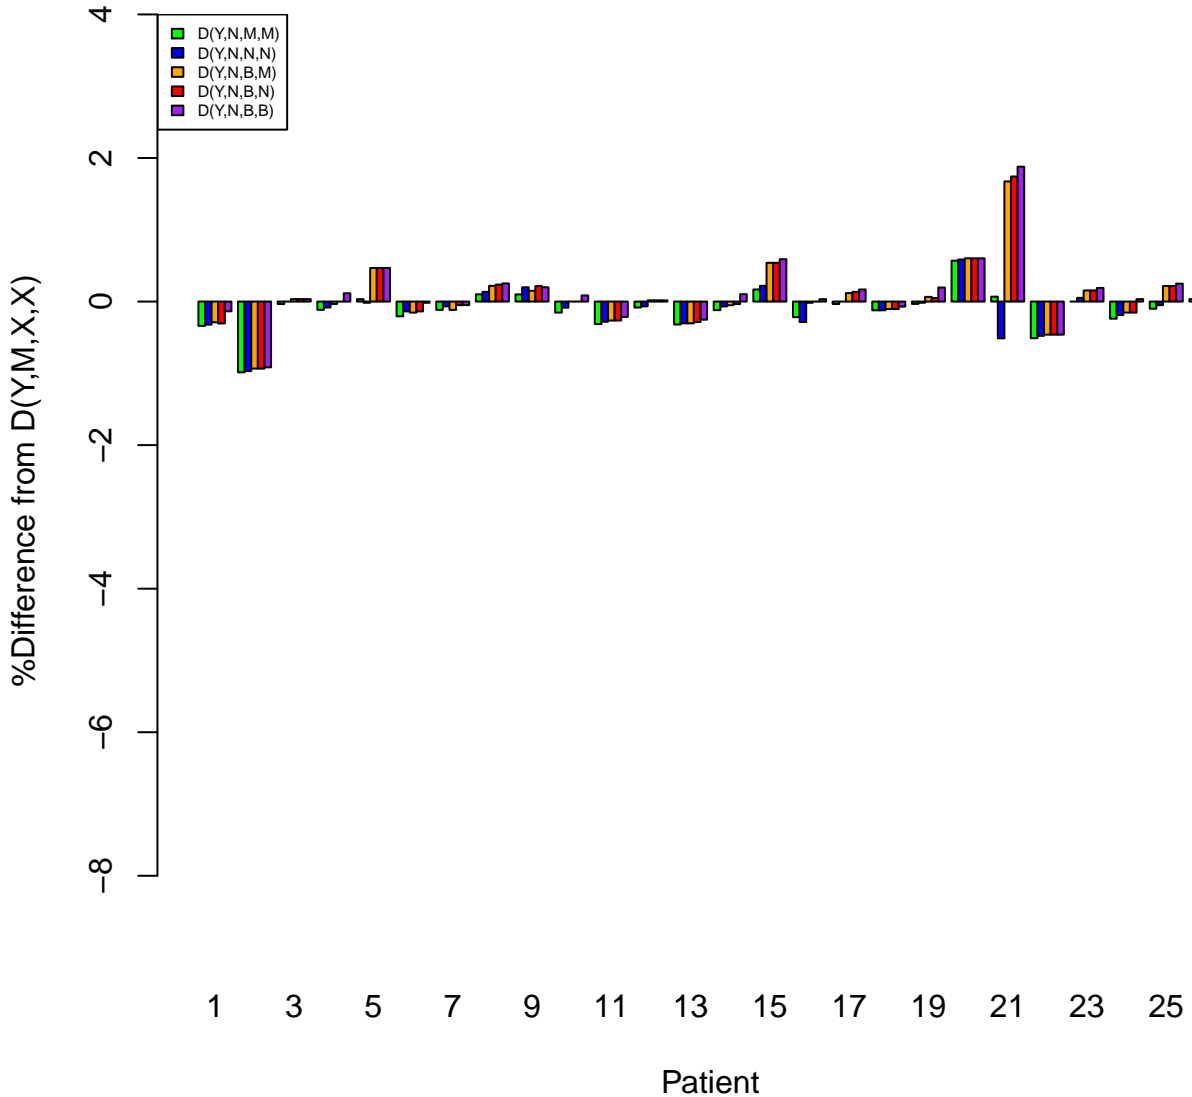

# Impact of tissue heterogeneities with different contrast to material mapping: B left

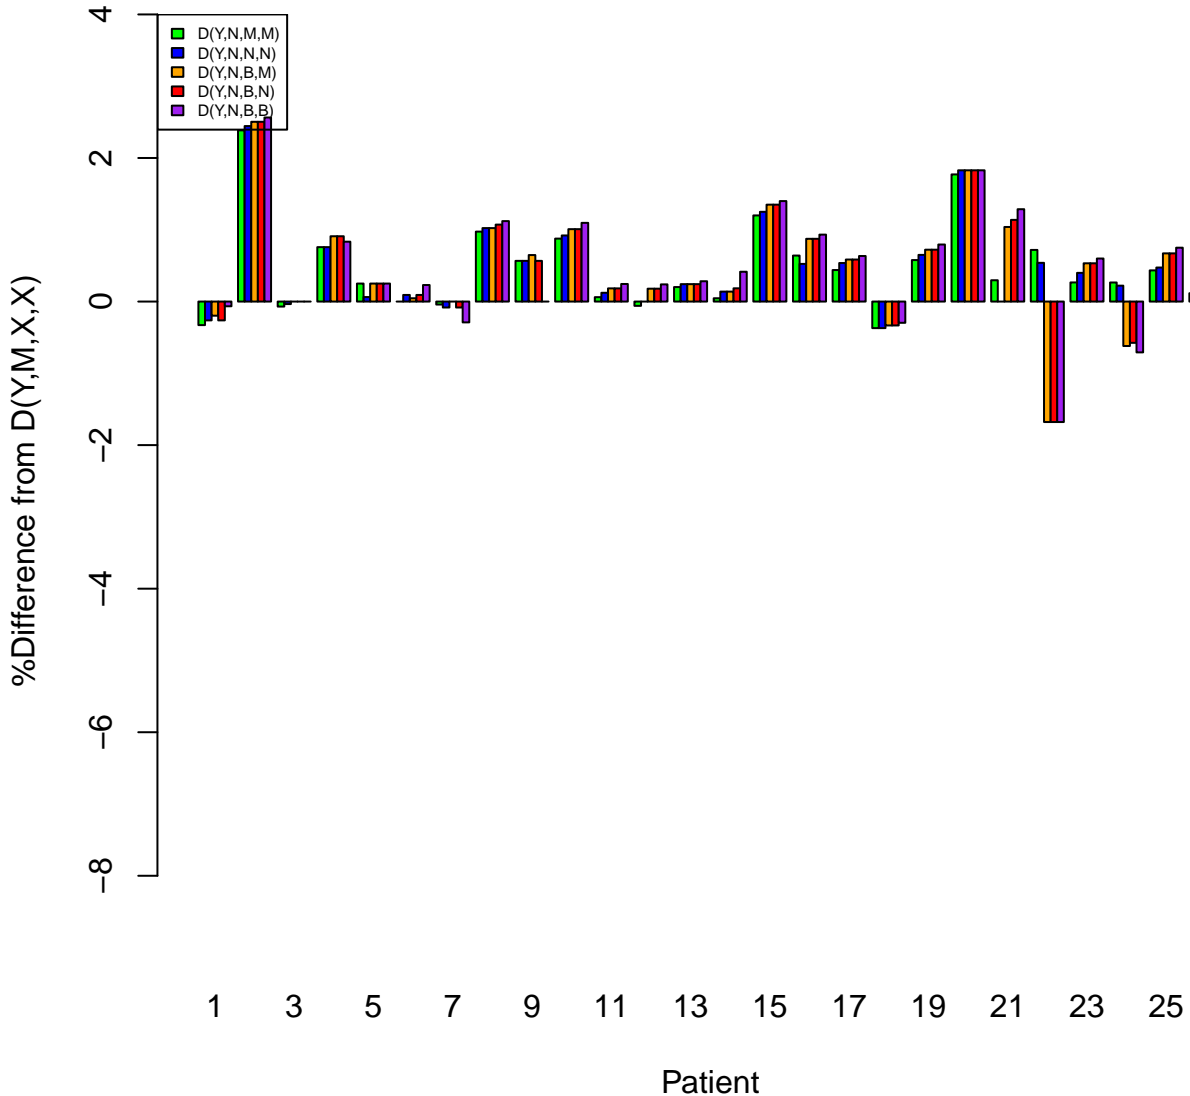

# Impact of tissue heterogeneities with different contrast to material mapping: B right

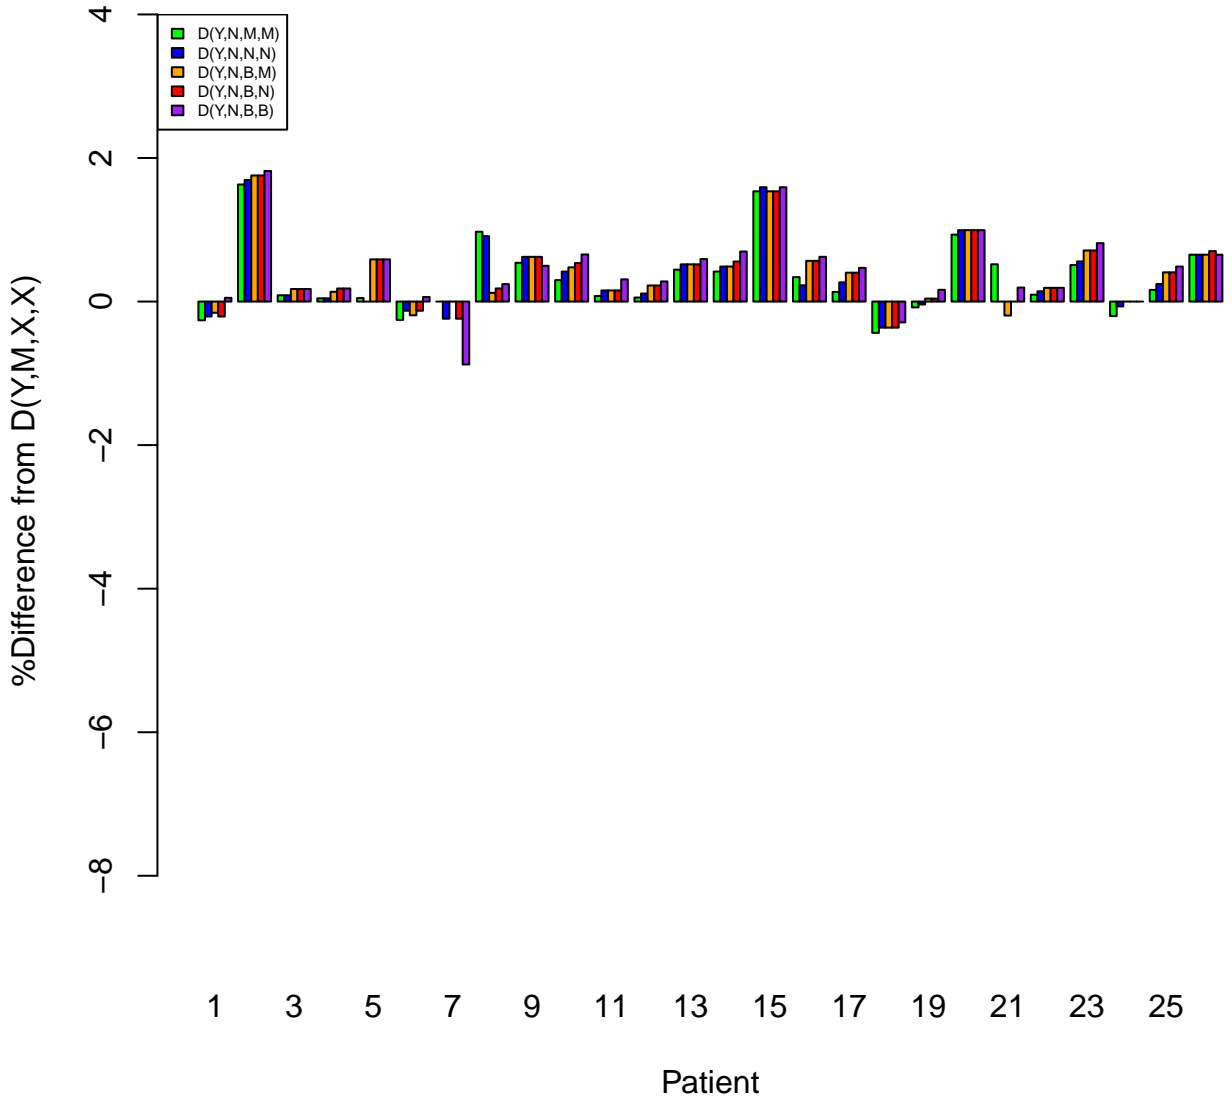

# Impact of tissue heterogeneities with different contrast to material mapping: ICRU bladder

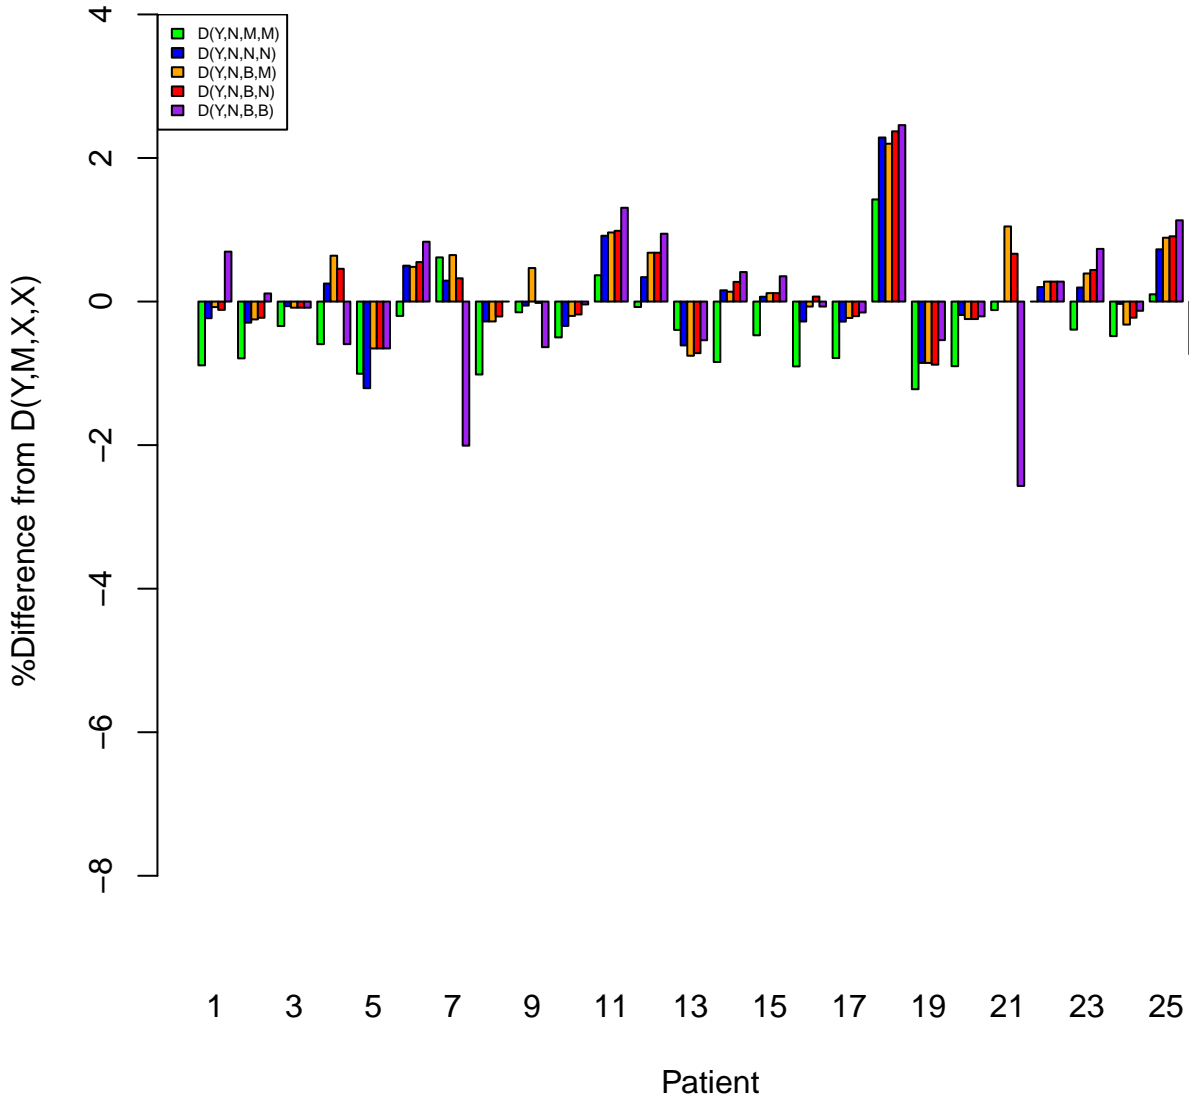

# Impact of tissue heterogeneities with different contrast to material mapping: ICRU rectum

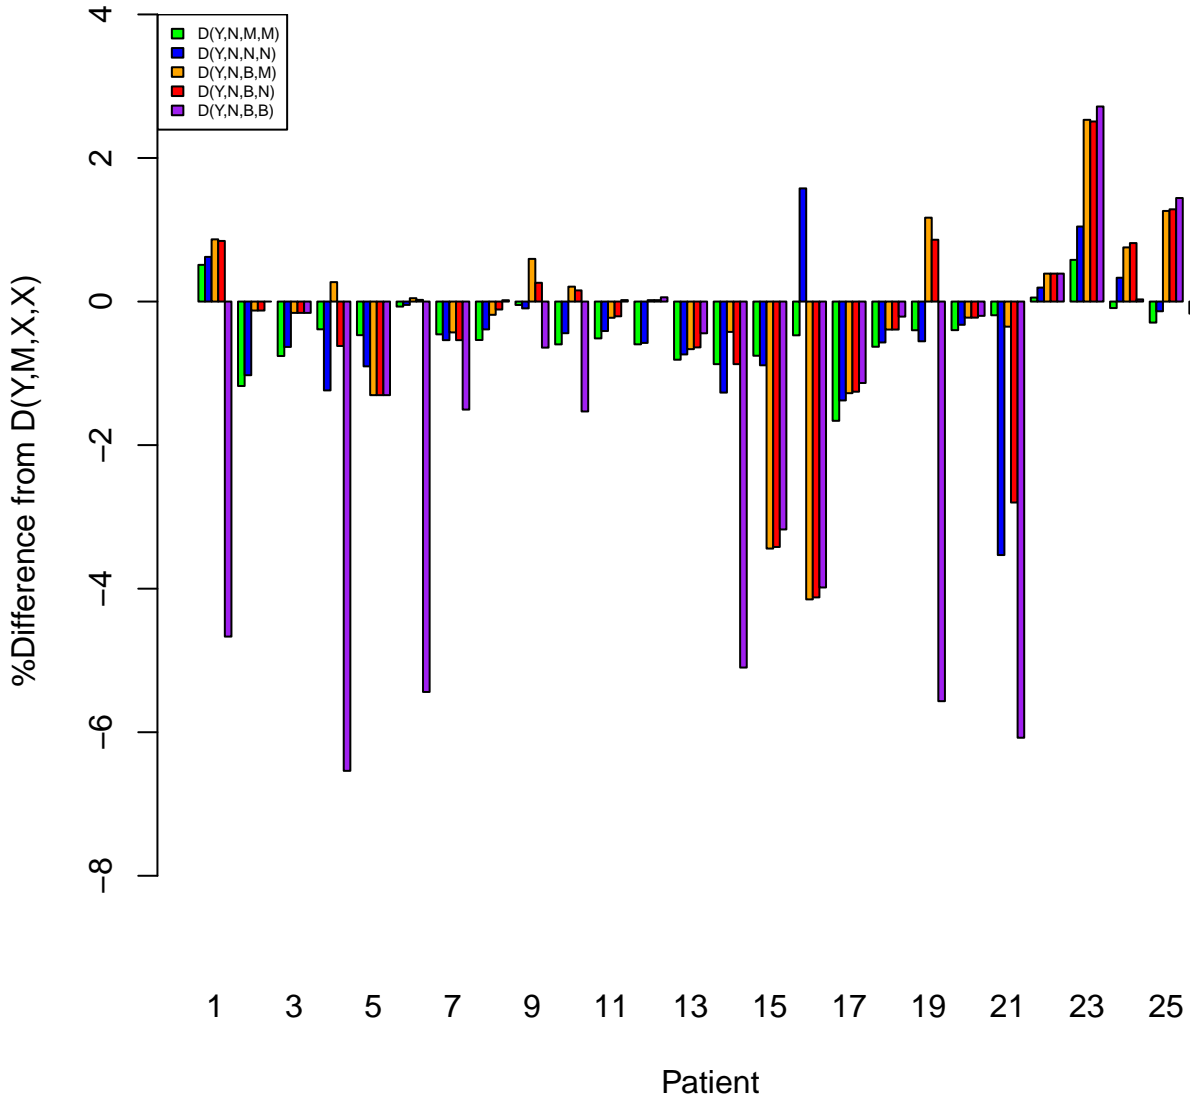

# Impact of tissue heterogeneities with different contrast to material mapping: D2cc bladder

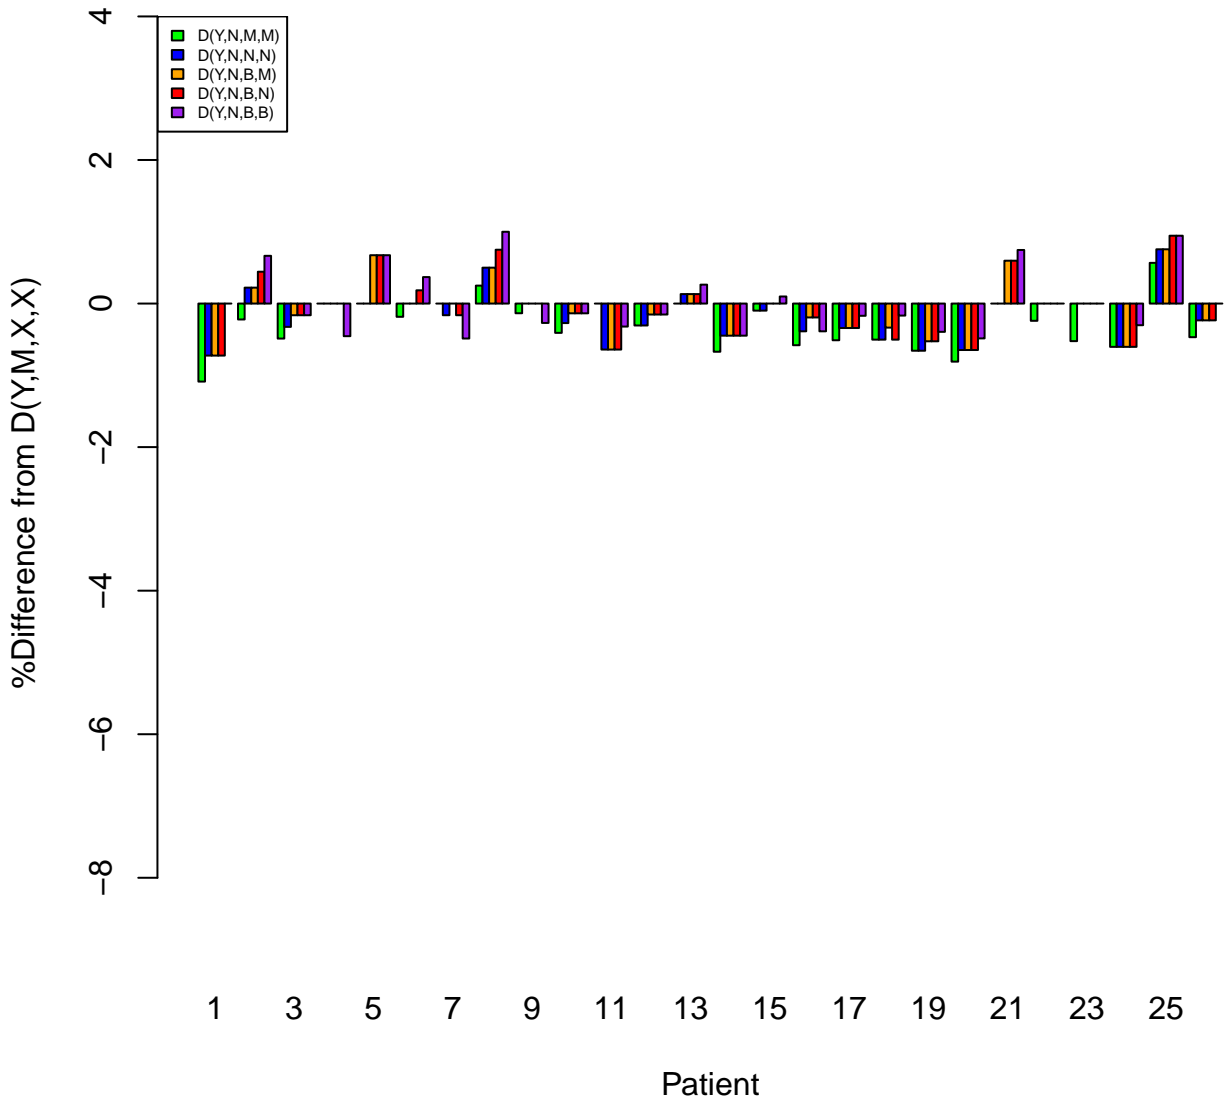

# Impact of tissue heterogeneities with different contrast to material mapping: D2cc rectum

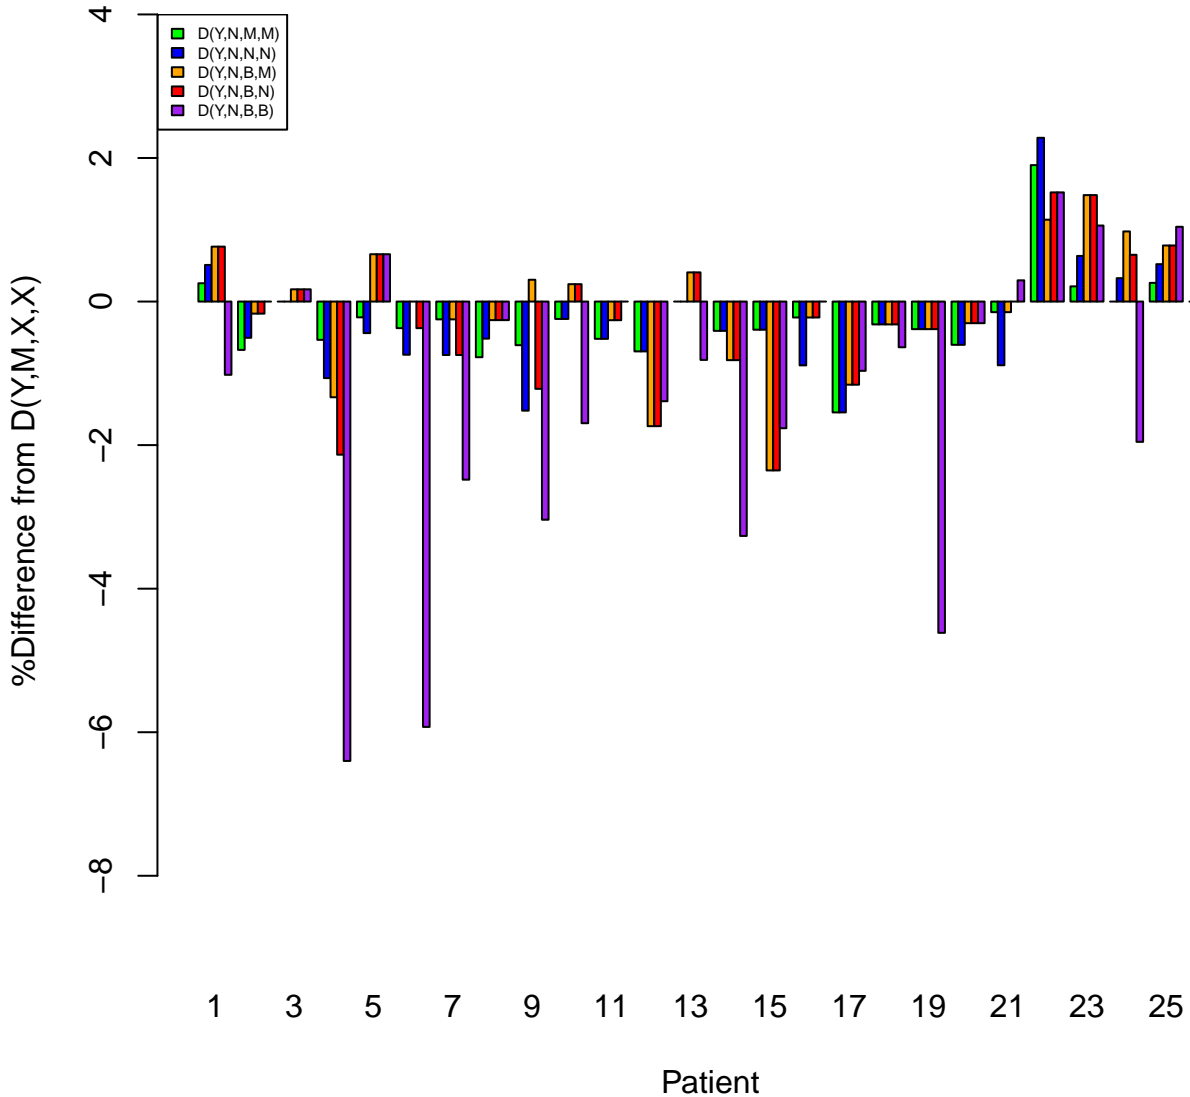



# Impact of tissue heterogeneities with different contrast to material mapping: D2cc sigmoid

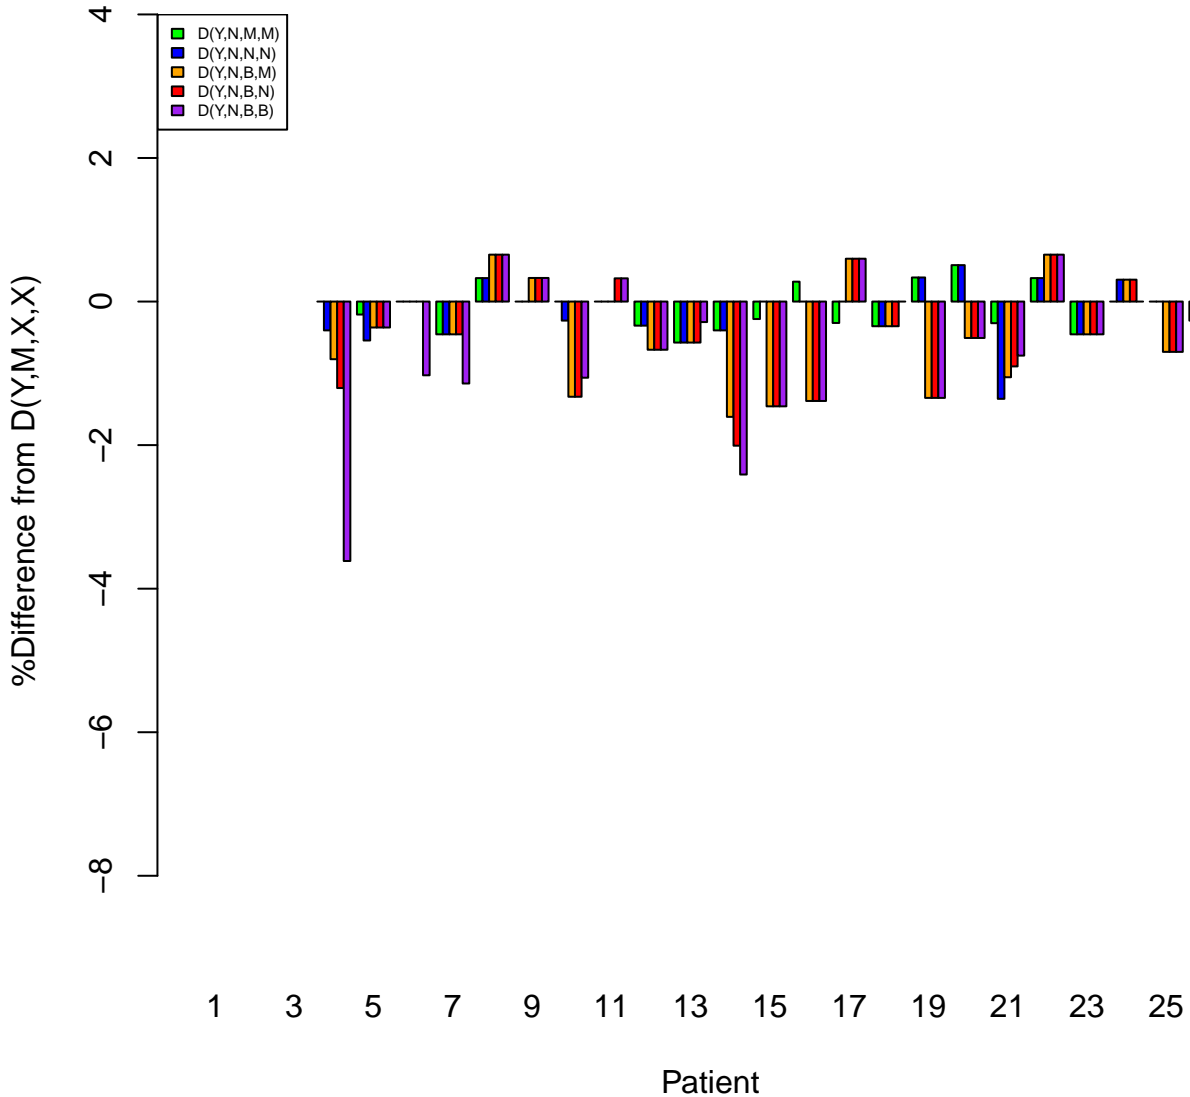

# Impact of tissue heterogeneities with different contrast to material mapping: balloon center

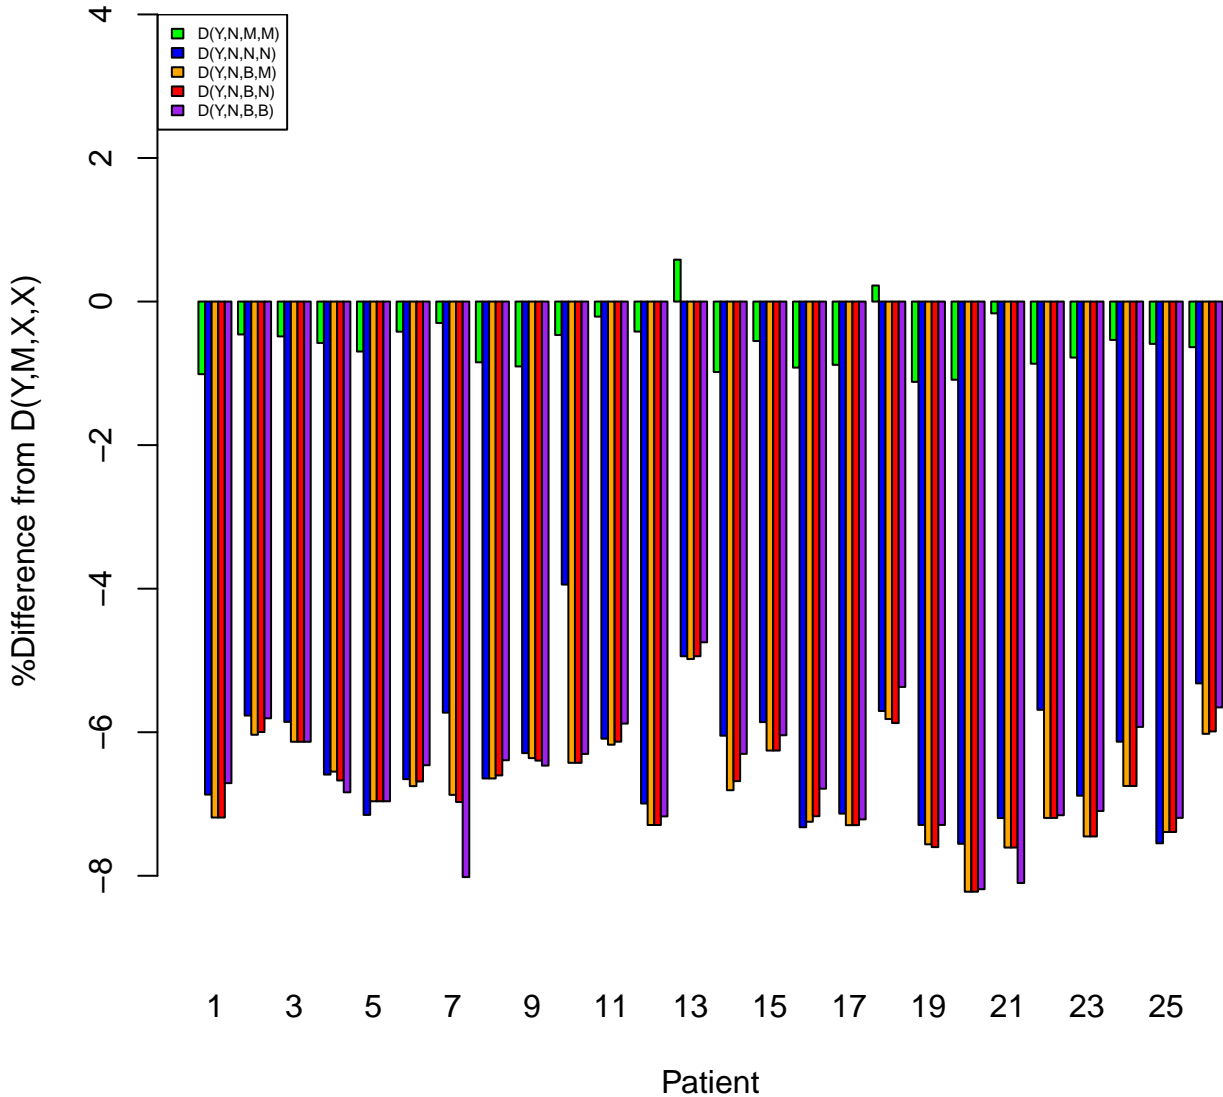

# Impact of tissue heterogeneities with different contrast to material mapping: 3 oclock

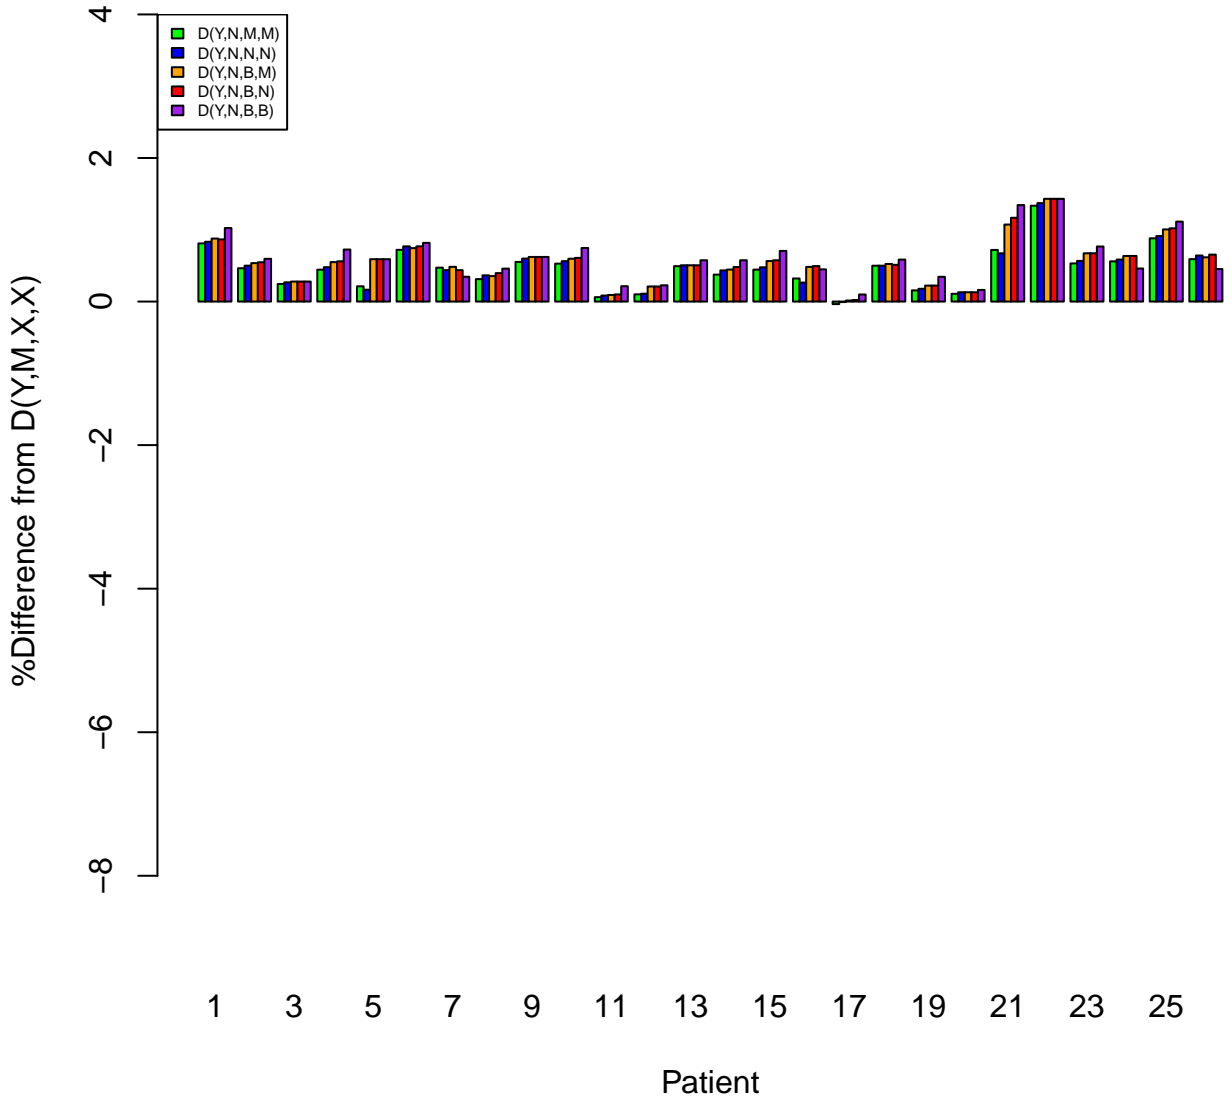

# Impact of tissue heterogeneities with different contrast to material mapping: 9 o'clock

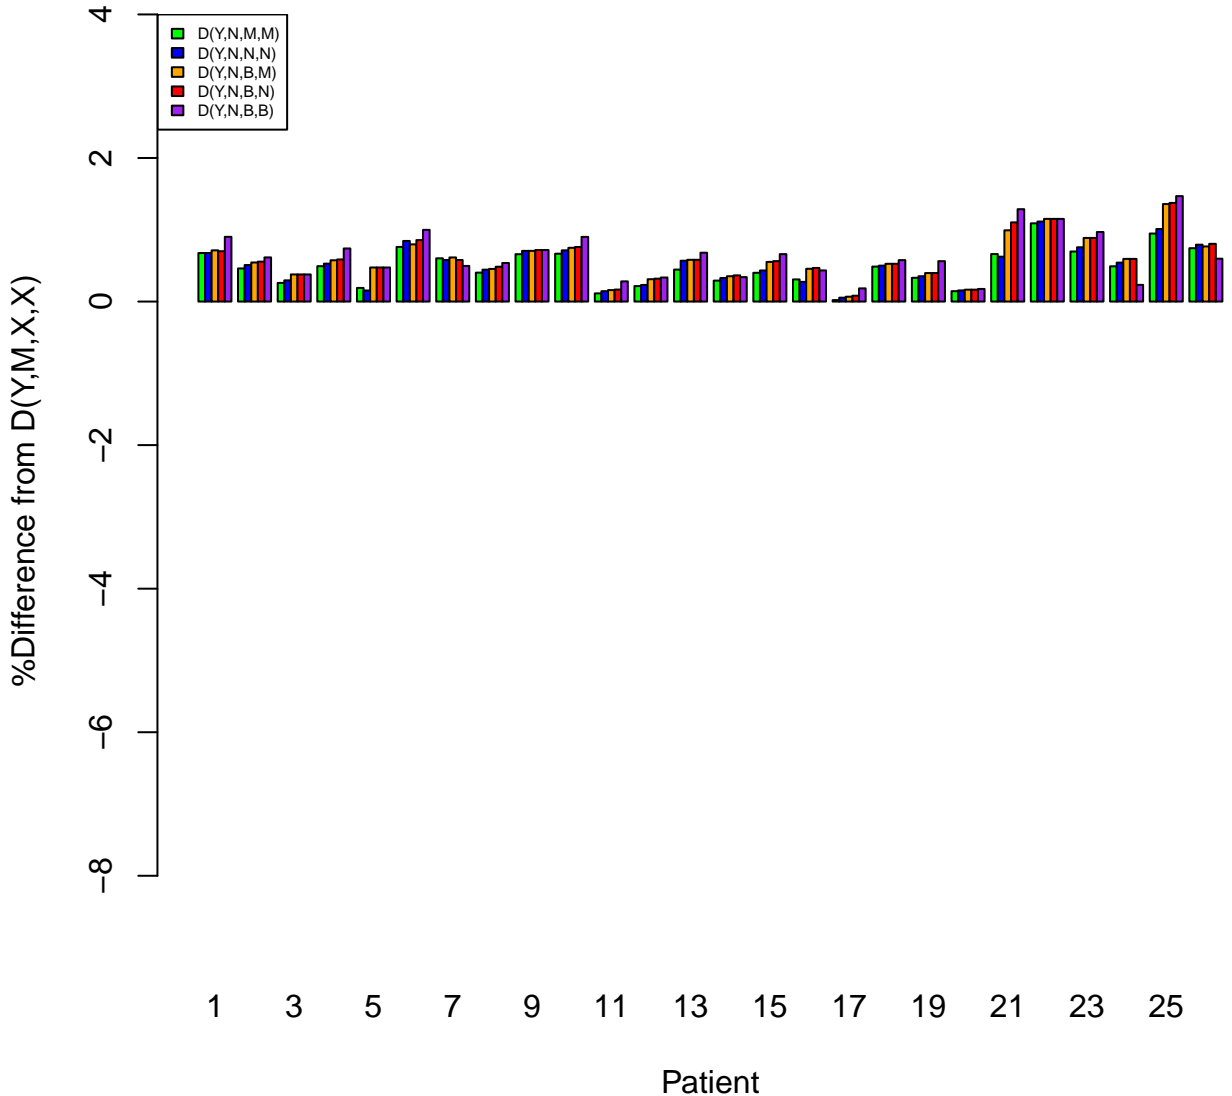

Supplement: NIHMS539658-supplement-08.pdf [file NIHMS539658-supplement-08.pdf]
