# Supplementary material
Source: PubMed Central journal article supplement (PMC3955059)

# The following pages contain the listed calculations for each patient for each point

| short name                                | function name | solid model applicator | body   | balloon & rectal contrast | packing contrast |
|-------------------------------------------|---------------|------------------------|--------|---------------------------|------------------|
| balloon & rectal, packing = Bone          | D(Y, N, B, B) | Y                      | None   | Bone                      | Bone             |
| balloon & rectal = Bone                   | D(Y, N, B, N) | Y                      | None   | Bone                      | None             |
| balloon & rectal = Bone, packing = Muscle | D(Y, N, B, M) | Y                      | None   | Bone                      | Muscle           |
| noApp, CT                                 | D(N, N, N, N) | N                      | None   | None                      | None             |
| CT                                        | D(Y, N, N, N) | Y                      | None   | None                      | None             |
| balloon & rectal, packing = Muscle        | D(Y, N, M, M) | Y                      | None   | Muscle                    | Muscle           |
| body = Muscle                             | D(Y, M, X, X) | Y                      | Muscle | NA                        | NA               |
| noApp, body = Muscle                      | D(N, M, X, X) | N                      | Muscle | NA                        | NA               |

D(solid model applicator, body, balloon & rectal contrast, packing contrast)

N = None

Y = Yes

X = not applicable

M = 1 g/cc Muscle

B = 2.25 g/cc Bone

 rectal contrast was overridden

 no rectal contrast, so entire rectum was overridden

# Patient\_01 A left

'phantom least similar to TG43'

D(Y, N, B, B)

D(Y, N, B, N)

D(Y, N, B, M)

D(N, N, N, N)

D(Y, N, N, N)

D(Y, N, M, M)

D(Y, M, X, X)

D(N, M, X, X)

'phantom most similar to TG43'

-10

-8

-6

-4

-2

0

2

%diff 100\*(GBBS-TG43)/TG43

GBBS(solid model applicator, body, balloon & rectal contrast, packing contrast)

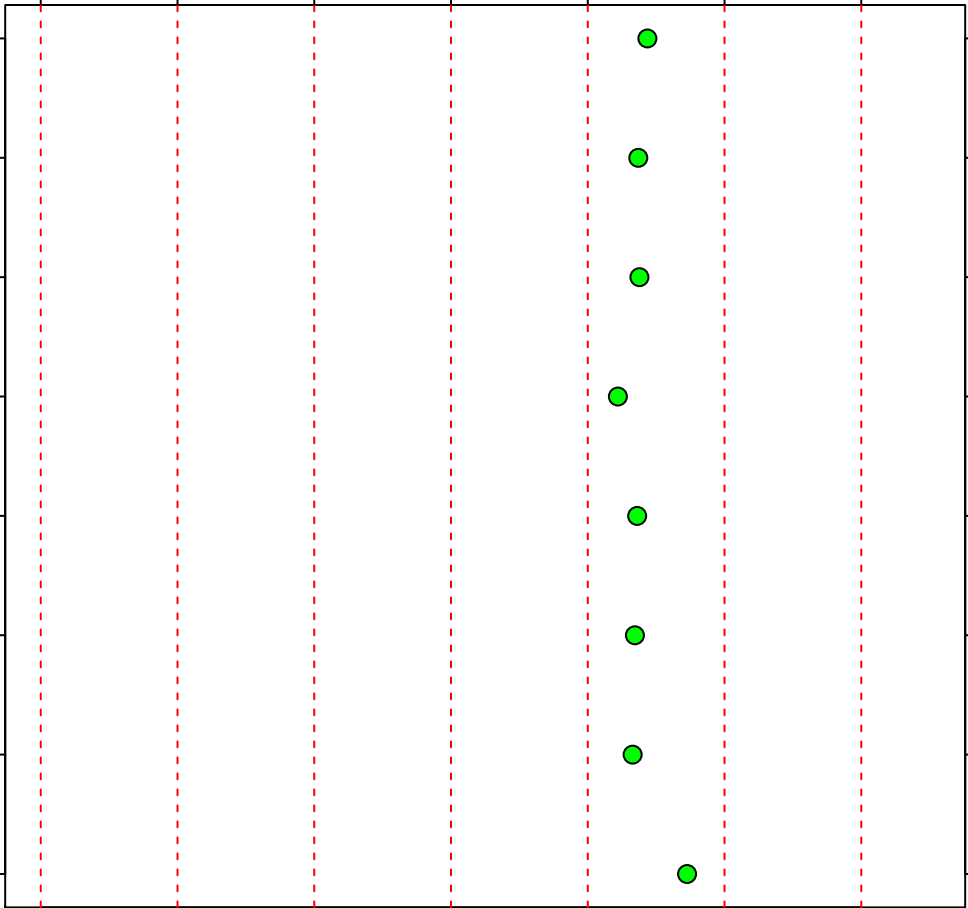

# Patient\_02 A left

'phantom least similar to TG43'

D(Y, N, B, B)

D(Y, N, B, N)

D(Y, N, B, M)

D(N, N, N, N)

D(Y, N, N, N)

D(Y, N, M, M)

D(Y, M, X, X)

D(N, M, X, X)

'phantom most similar to TG43'

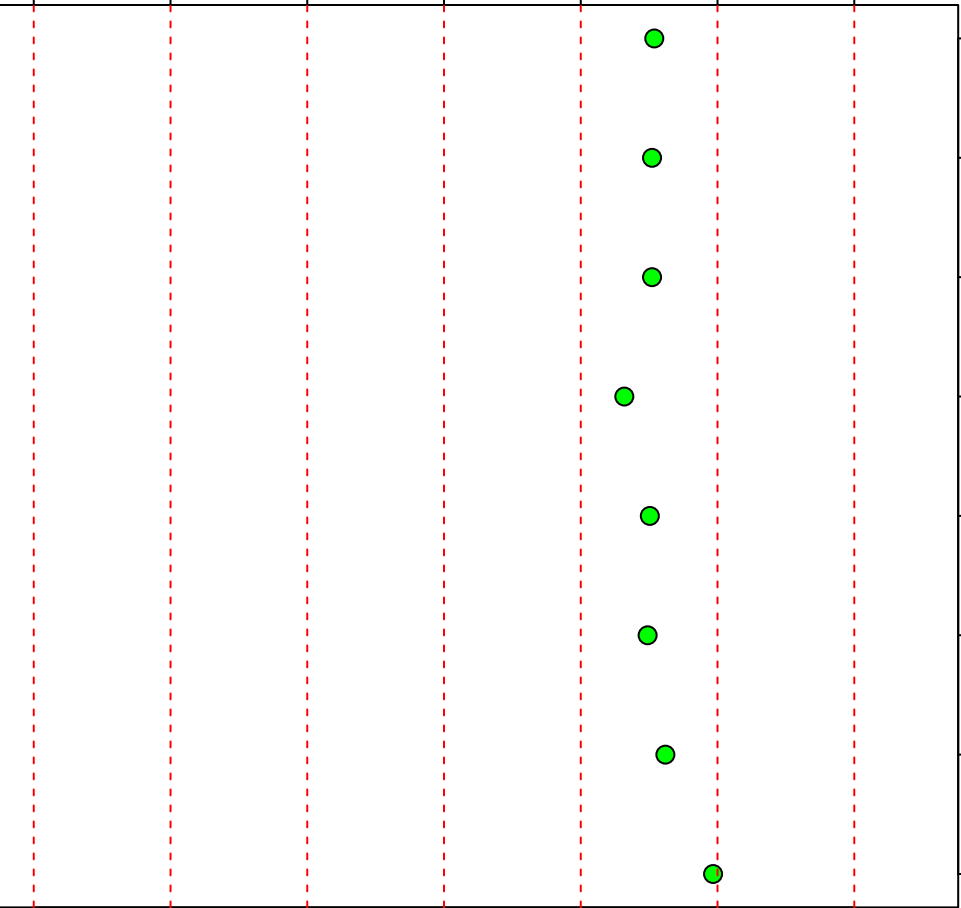

-10 -8 -6 -4 -2 0 2

%diff 100\*(GBBS-TG43)/TG43

GBBS(solid model applicator, body, balloon & rectal contrast, packing contrast)

# Patient\_03 A left

'phantom least similar to TG43'

D(Y, N, B, B)

D(Y, N, B, N)

D(Y, N, B, M)

D(N, N, N, N)

D(Y, N, N, N)

D(Y, N, M, M)

D(Y, M, X, X)

D(N, M, X, X)

'phantom most similar to TG43'

-10

-8

-6

-4

-2

0

2

%diff 100\*(GBBS-TG43)/TG43

GBBS(solid model applicator, body, balloon & rectal contrast, packing contrast)

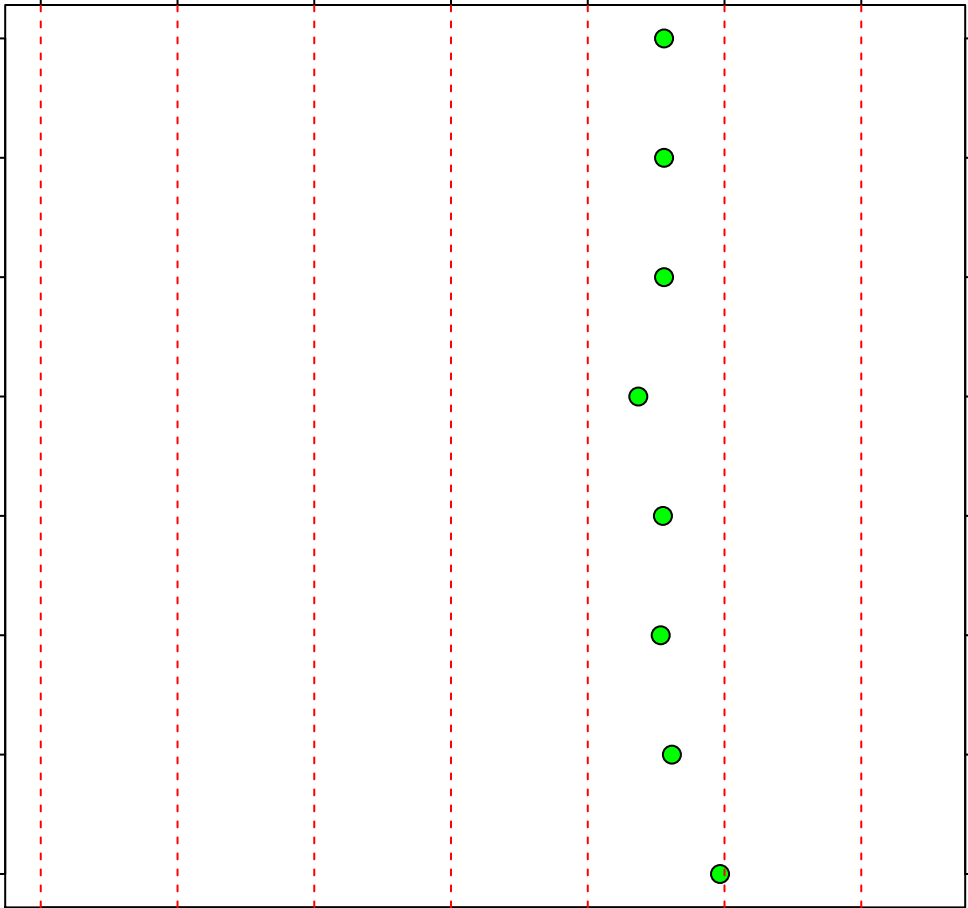

# Patient\_04 A left

'phantom least similar to TG43'

D(Y, N, B, B)

D(Y, N, B, N)

D(Y, N, B, M)

D(N, N, N, N)

D(Y, N, N, N)

D(Y, N, M, M)

D(Y, M, X, X)

D(N, M, X, X)

'phantom most similar to TG43'

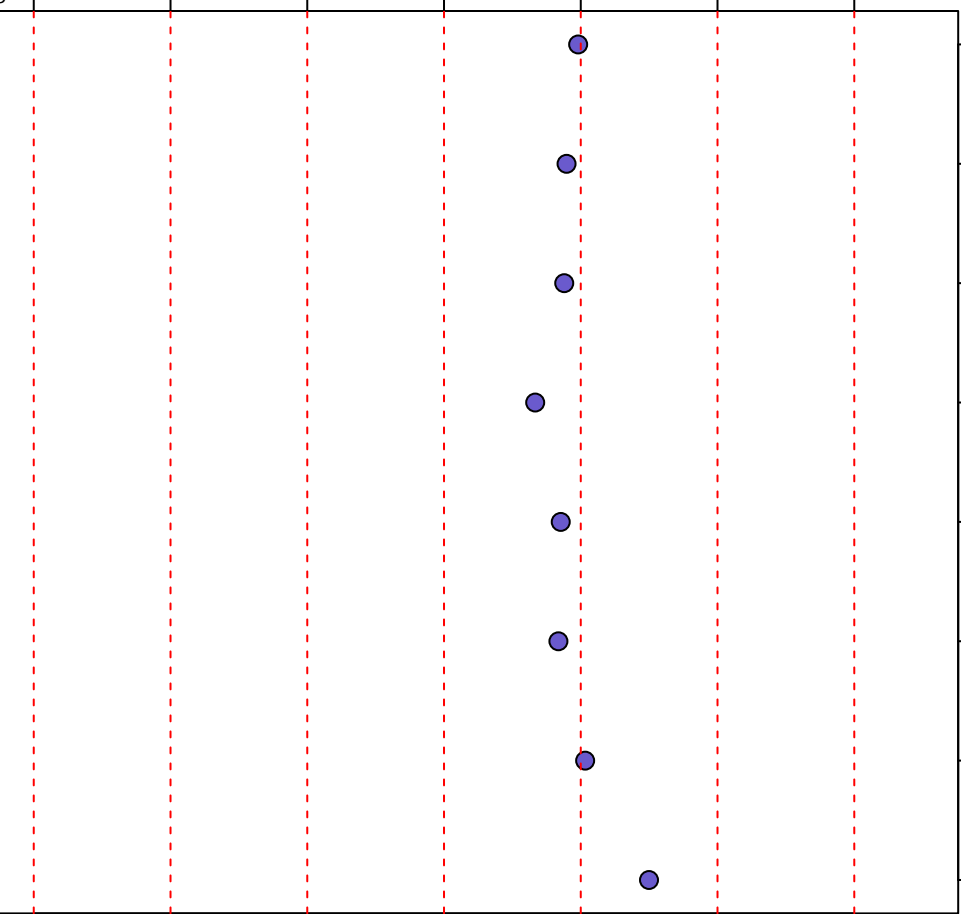

%diff 100\*(GBBS-TG43)/TG43

GBBS(solid model applicator, body, balloon & rectal contrast, packing contrast)

# Patient\_05 A left

'phantom least similar to TG43'

D(Y, N, B, B)

D(Y, N, B, N)

D(Y, N, B, M)

D(N, N, N, N)

D(Y, N, N, N)

D(Y, N, M, M)

D(Y, M, X, X)

D(N, M, X, X)

'phantom most similar to TG43'

-10

-8

-6

-4

-2

0

2

%diff 100\*(GBBS-TG43)/TG43

GBBS(solid model applicator, body, balloon & rectal contrast, packing contrast)

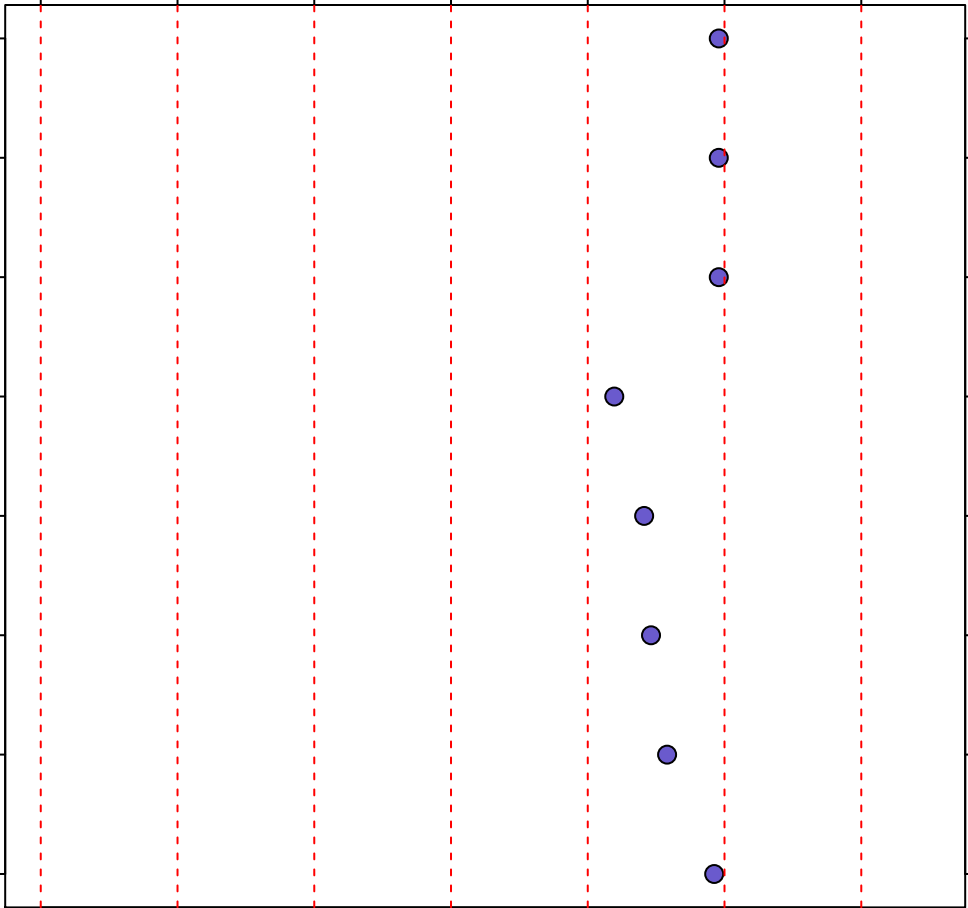

# Patient\_06 A left

'phantom least similar to TG43'

D(Y, N, B, B)

D(Y, N, B, N)

D(Y, N, B, M)

D(N, N, N, N)

D(Y, N, N, N)

D(Y, N, M, M)

D(Y, M, X, X)

D(N, M, X, X)

'phantom most similar to TG43'

-10

-8

-6

-4

-2

0

2

%diff 100\*(GBBS-TG43)/TG43

GBBS(solid model applicator, body, balloon & rectal contrast, packing contrast)

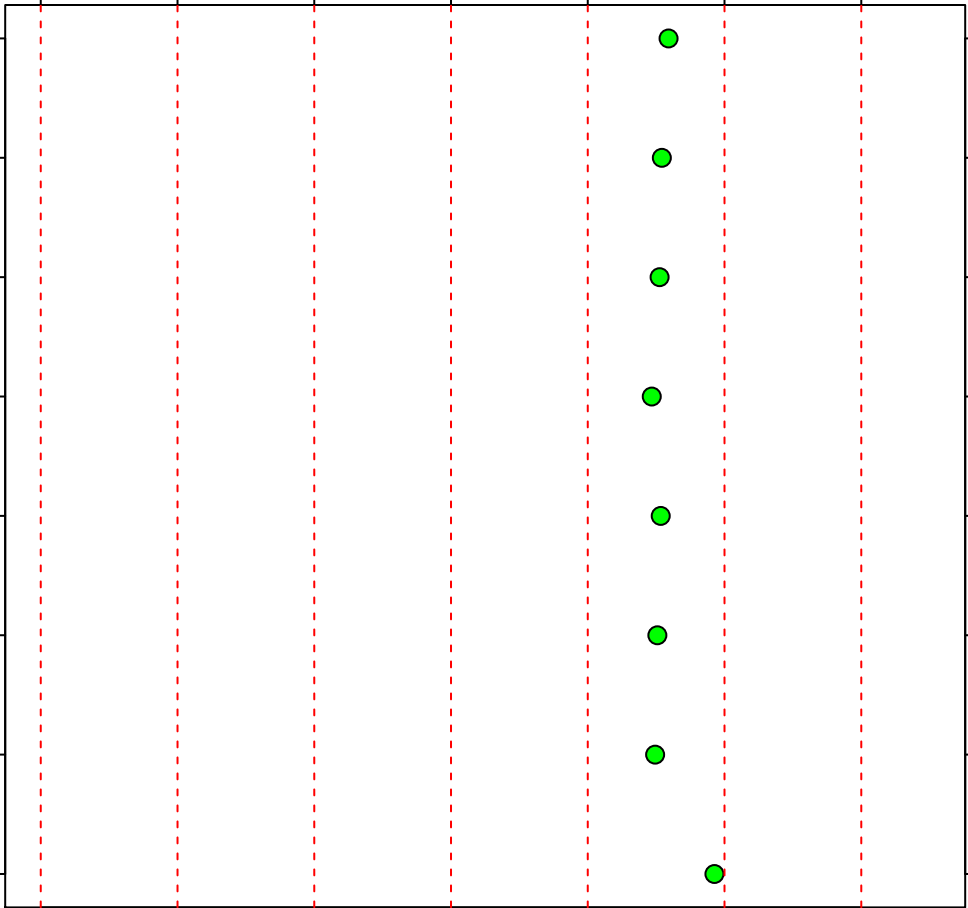

# Patient\_07 A left

'phantom least similar to TG43'

D(Y, N, B, B)

D(Y, N, B, N)

D(Y, N, B, M)

D(N, N, N, N)

D(Y, N, N, N)

D(Y, N, M, M)

D(Y, M, X, X)

D(N, M, X, X)

'phantom most similar to TG43'

-10

-8

-6

-4

-2

0

2

%diff 100\*(GBBS-TG43)/TG43

GBBS(solid model applicator, body, balloon & rectal contrast, packing contrast)

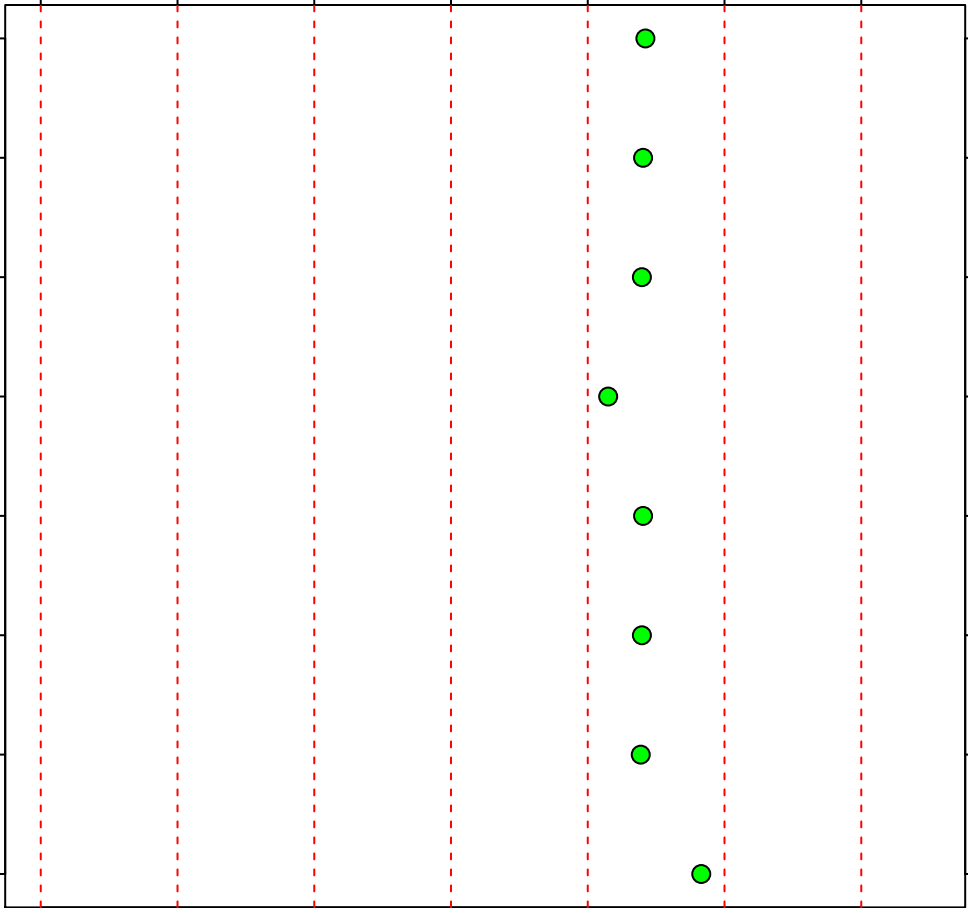



# Patient\_08 A left

'phantom least similar to TG43'

D(Y, N, B, B)

D(Y, N, B, N)

D(Y, N, B, M)

D(N, N, N, N)

D(Y, N, N, N)

D(Y, N, M, M)

D(Y, M, X, X)

D(N, M, X, X)

'phantom most similar to TG43'

-10

-8

-6

-4

-2

0

2

%diff 100\*(GBBS-TG43)/TG43

GBBS(solid model applicator, body, balloon & rectal contrast, packing contrast)

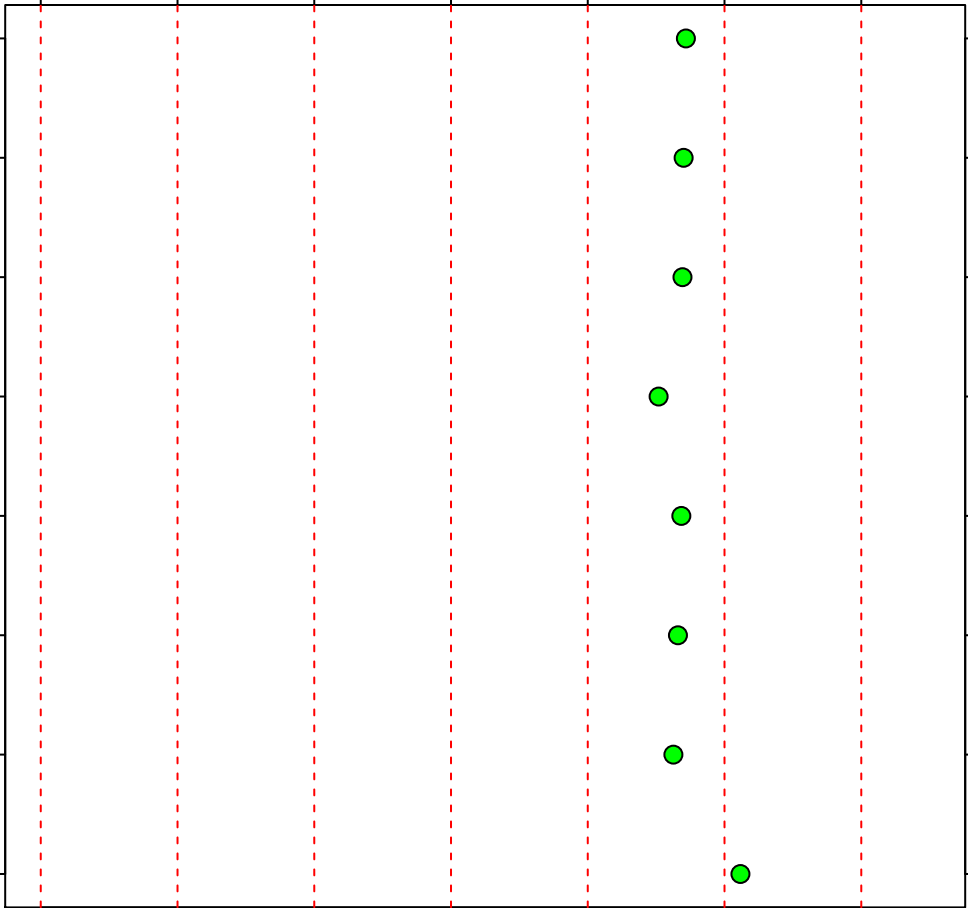

# Patient\_09 A left

'phantom least similar to TG43'

D(Y, N, B, B)

D(Y, N, B, N)

D(Y, N, B, M)

D(N, N, N, N)

D(Y, N, N, N)

D(Y, N, M, M)

D(Y, M, X, X)

D(N, M, X, X)

'phantom most similar to TG43'

-10

-8

-6

-4

-2

0

2

%diff 100\*(GBBS-TG43)/TG43

GBBS(solid model applicator, body, balloon & rectal contrast, packing contrast)

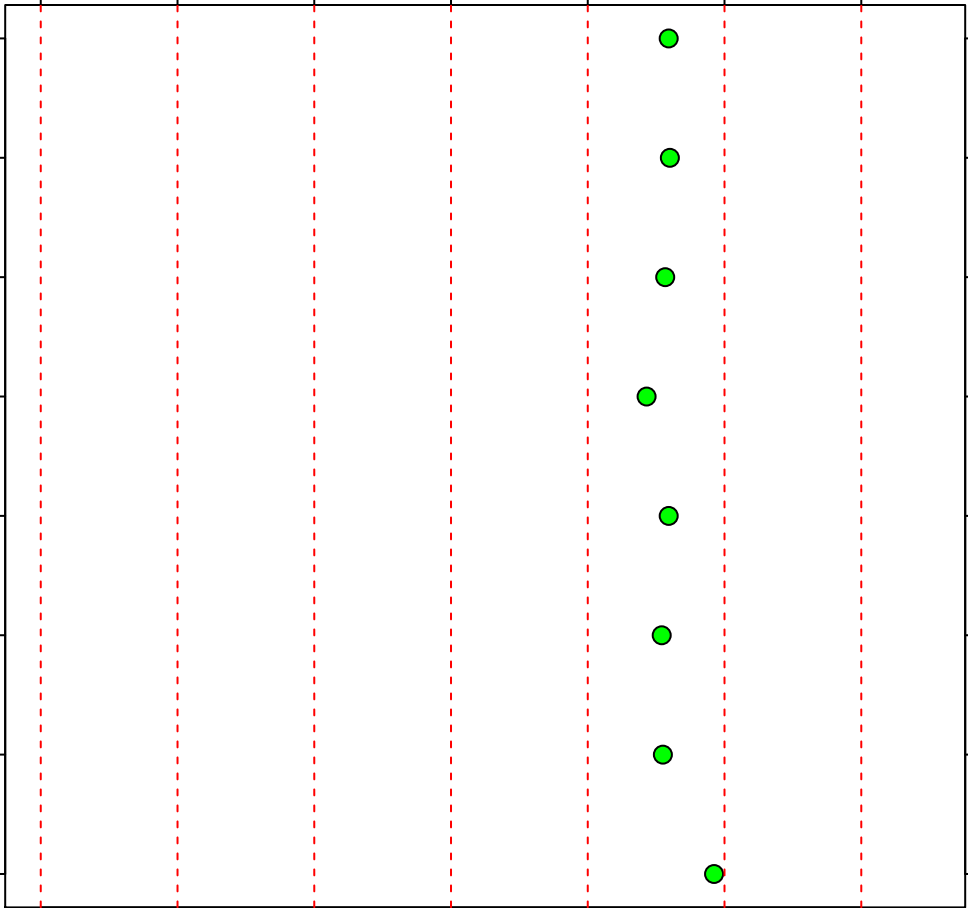

# Patient\_10 A left

'phantom least similar to TG43'

- D(Y, N, B, B)
- D(Y, N, B, N)
- D(Y, N, B, M)
- D(N, N, N, N)
- D(Y, N, N, N)
- D(Y, N, M, M)
- D(Y, M, X, X)
- D(N, M, X, X)

'phantom most similar to TG43'

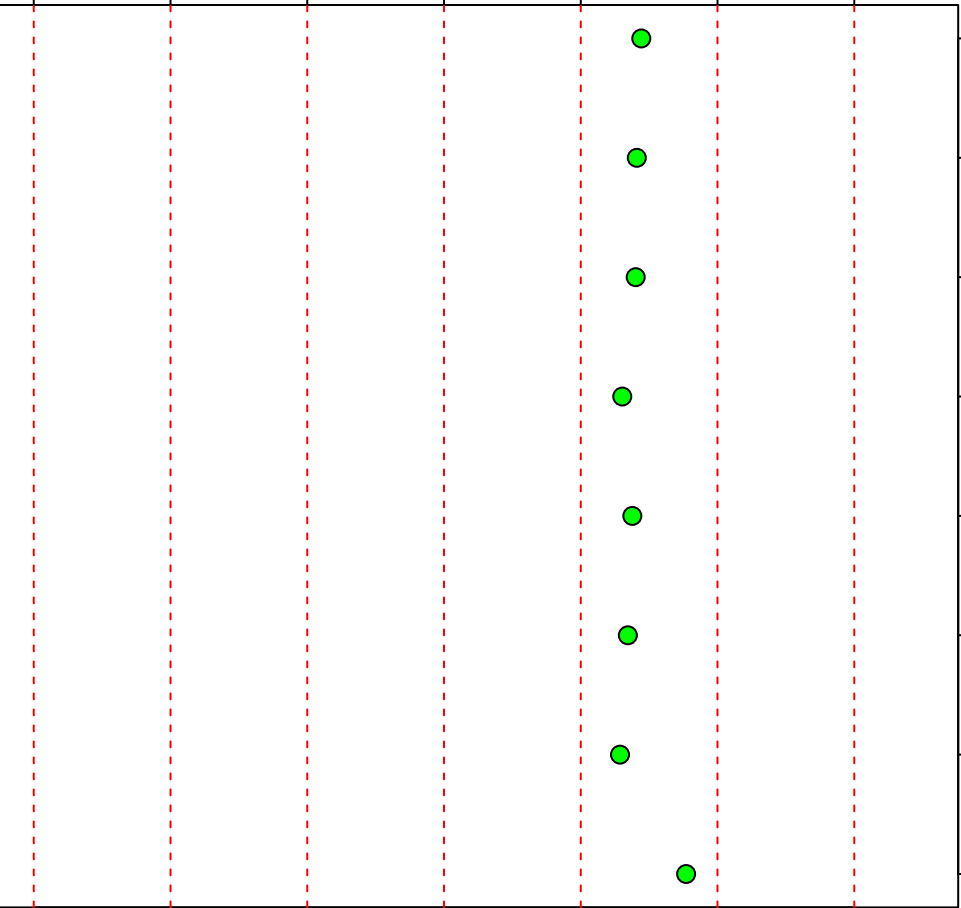

-10 -8 -6 -4 -2 0 2

%diff 100\*(GBBS-TG43)/TG43

GBBS(solid model applicator, body, balloon & rectal contrast, packing contrast)

# Patient\_11 A left

'phantom least similar to TG43'

D(Y, N, B, B)

D(Y, N, B, N)

D(Y, N, B, M)

D(N, N, N, N)

D(Y, N, N, N)

D(Y, N, M, M)

D(Y, M, X, X)

D(N, M, X, X)

'phantom most similar to TG43'

-10

-8

-6

-4

-2

0

2

%diff 100\*(GBBS-TG43)/TG43

GBBS(solid model applicator, body, balloon & rectal contrast, packing contrast)

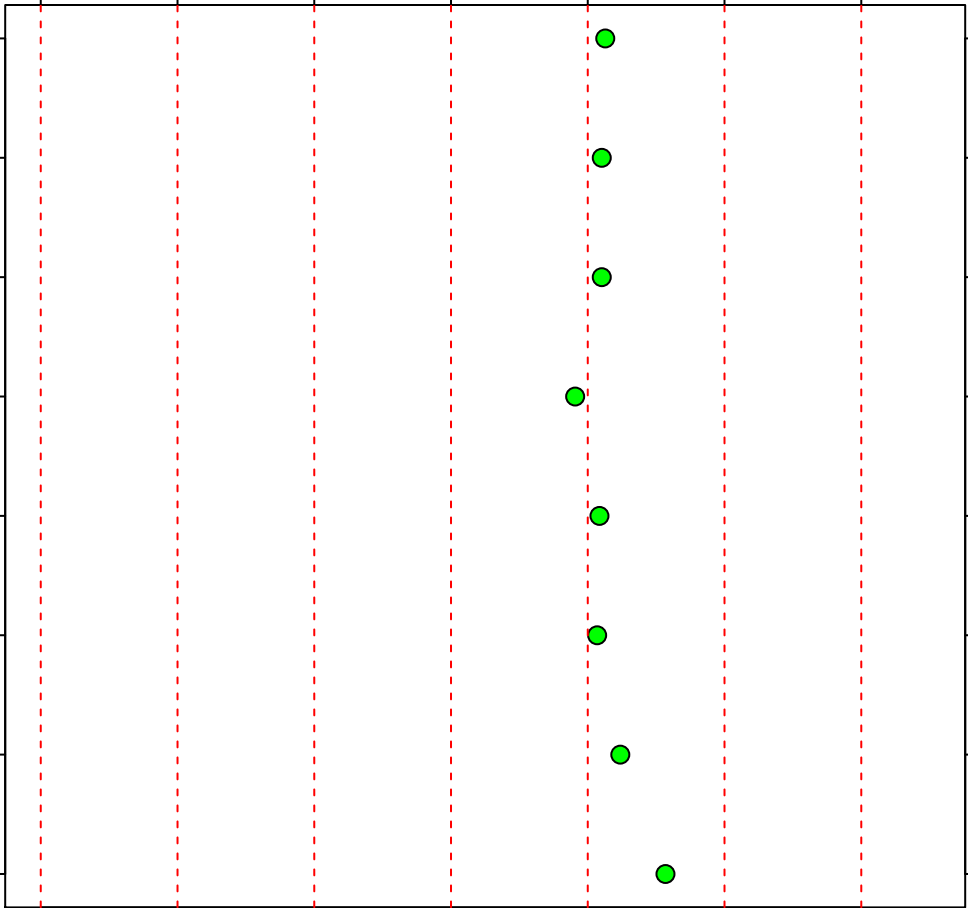

# Patient\_12 A left

'phantom least similar to TG43'

D(Y, N, B, B)

D(Y, N, B, N)

D(Y, N, B, M)

D(N, N, N, N)

D(Y, N, N, N)

D(Y, N, M, M)

D(Y, M, X, X)

D(N, M, X, X)

'phantom most similar to TG43'

-10

-8

-6

-4

-2

0

2

%diff 100\*(GBBS-TG43)/TG43

GBBS(solid model applicator, body, balloon & rectal contrast, packing contrast)

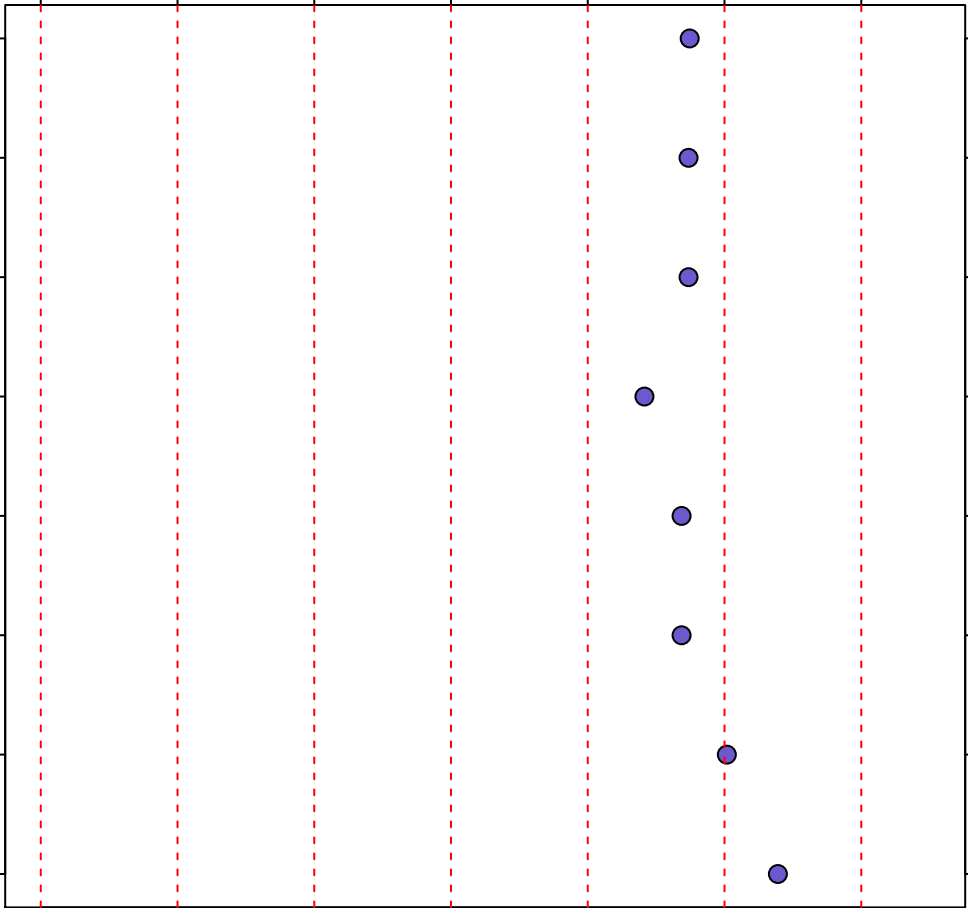

# Patient\_13 A left

'phantom least similar to TG43'

D(Y, N, B, B)

D(Y, N, B, N)

D(Y, N, B, M)

D(N, N, N, N)

D(Y, N, N, N)

D(Y, N, M, M)

D(Y, M, X, X)

D(N, M, X, X)

'phantom most similar to TG43'

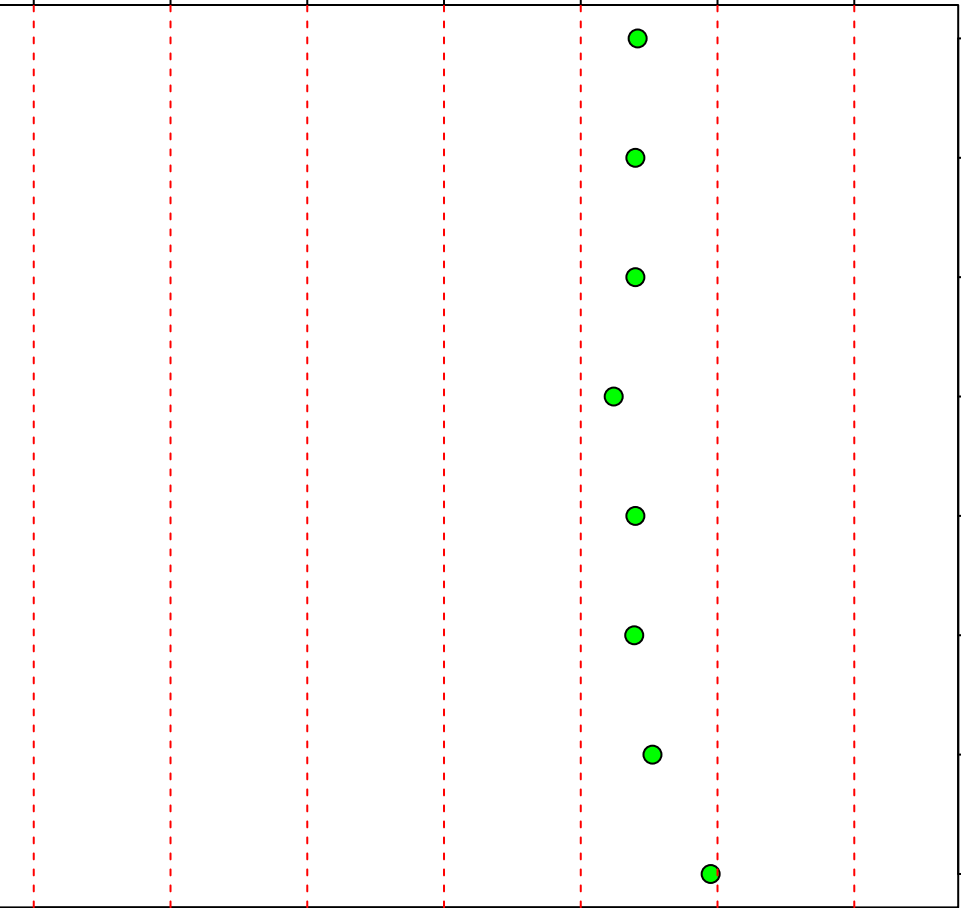

-10 -8 -6 -4 -2 0 2

%diff 100\*(GBBS-TG43)/TG43

GBBS(solid model applicator, body, balloon & rectal contrast, packing contrast)

# Patient\_14 A left

'phantom least similar to TG43'

D(Y, N, B, B)

D(Y, N, B, N)

D(Y, N, B, M)

D(N, N, N, N)

D(Y, N, N, N)

D(Y, N, M, M)

D(Y, M, X, X)

D(N, M, X, X)

'phantom most similar to TG43'

-10

-8

-6

-4

-2

0

2

%diff 100\*(GBBS-TG43)/TG43

GBBS(solid model applicator, body, balloon & rectal contrast, packing contrast)

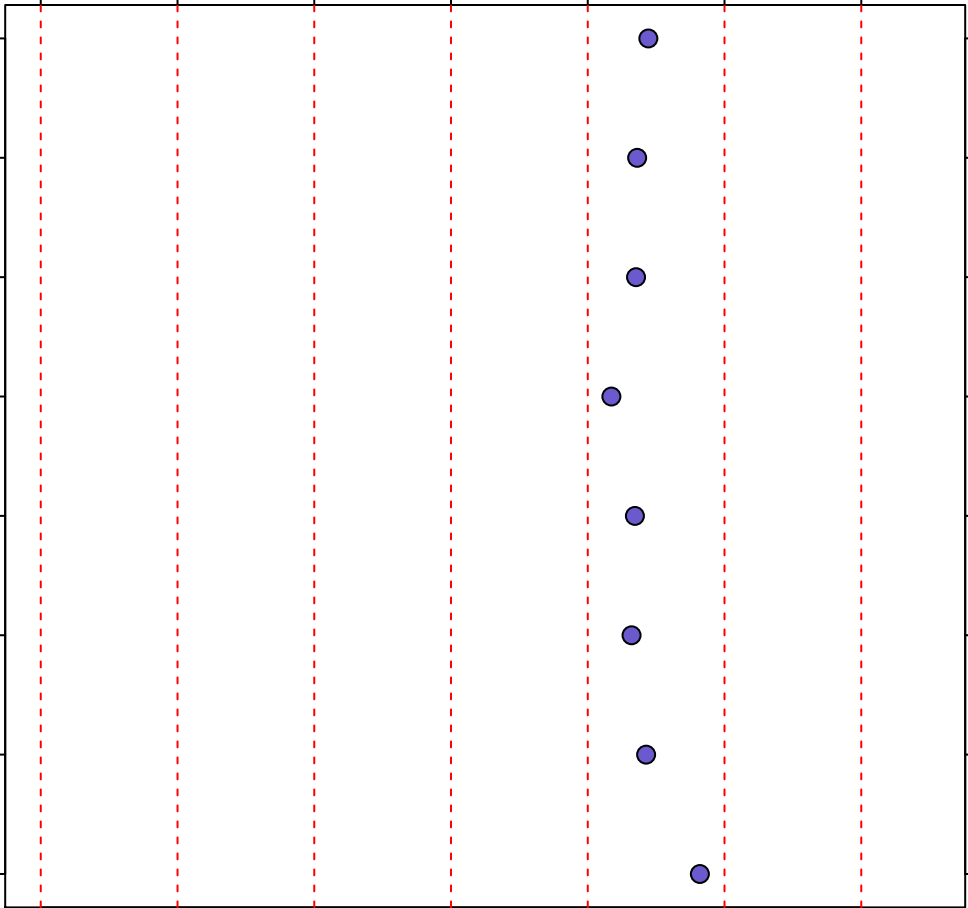

# Patient\_15 A left

'phantom least similar to TG43'

D(Y, N, B, B)

D(Y, N, B, N)

D(Y, N, B, M)

D(N, N, N, N)

D(Y, N, N, N)

D(Y, N, M, M)

D(Y, M, X, X)

D(N, M, X, X)

'phantom most similar to TG43'

-10 -8 -6 -4 -2 0 2

%diff 100\*(GBBS-TG43)/TG43

GBBS(solid model applicator, body, balloon & rectal contrast, packing contrast)

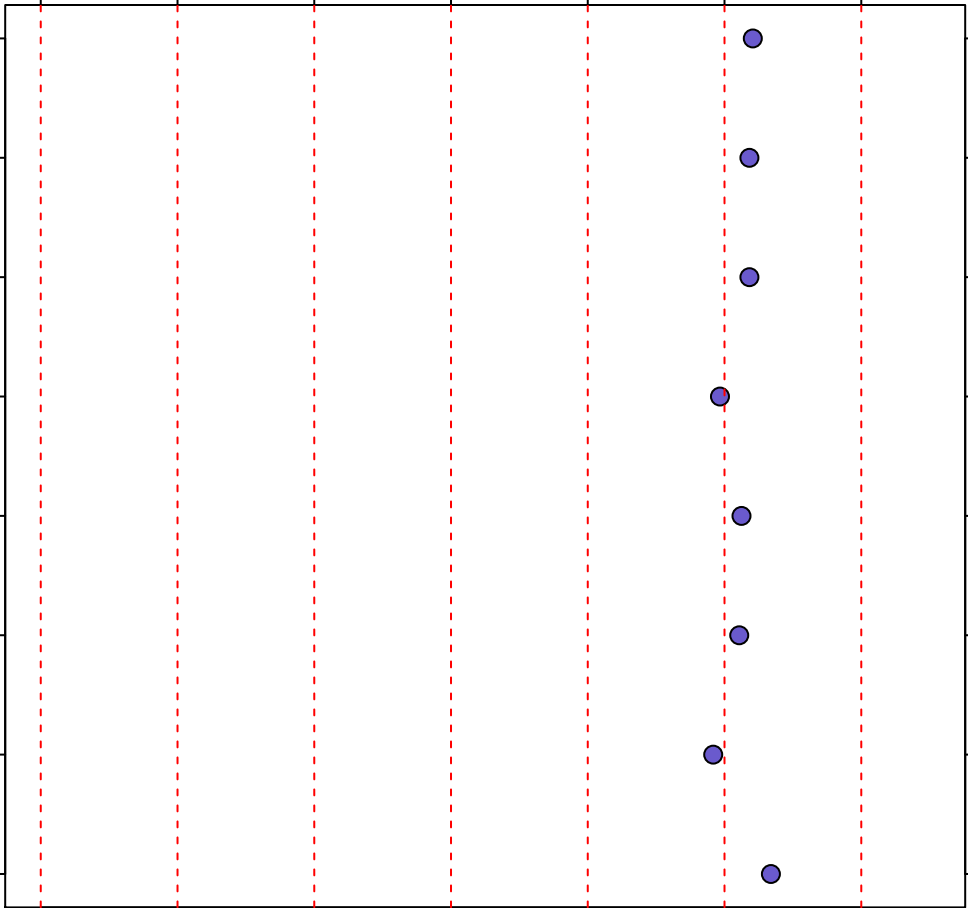



# Patient\_16 A left

'phantom least similar to TG43'

D(Y, N, B, B)

D(Y, N, B, N)

D(Y, N, B, M)

D(N, N, N, N)

D(Y, N, N, N)

D(Y, N, M, M)

D(Y, M, X, X)

D(N, M, X, X)

'phantom most similar to TG43'

-10

-8

-6

-4

-2

0

2

%diff 100\*(GBBS-TG43)/TG43

GBBS(solid model applicator, body, balloon & rectal contrast, packing contrast)

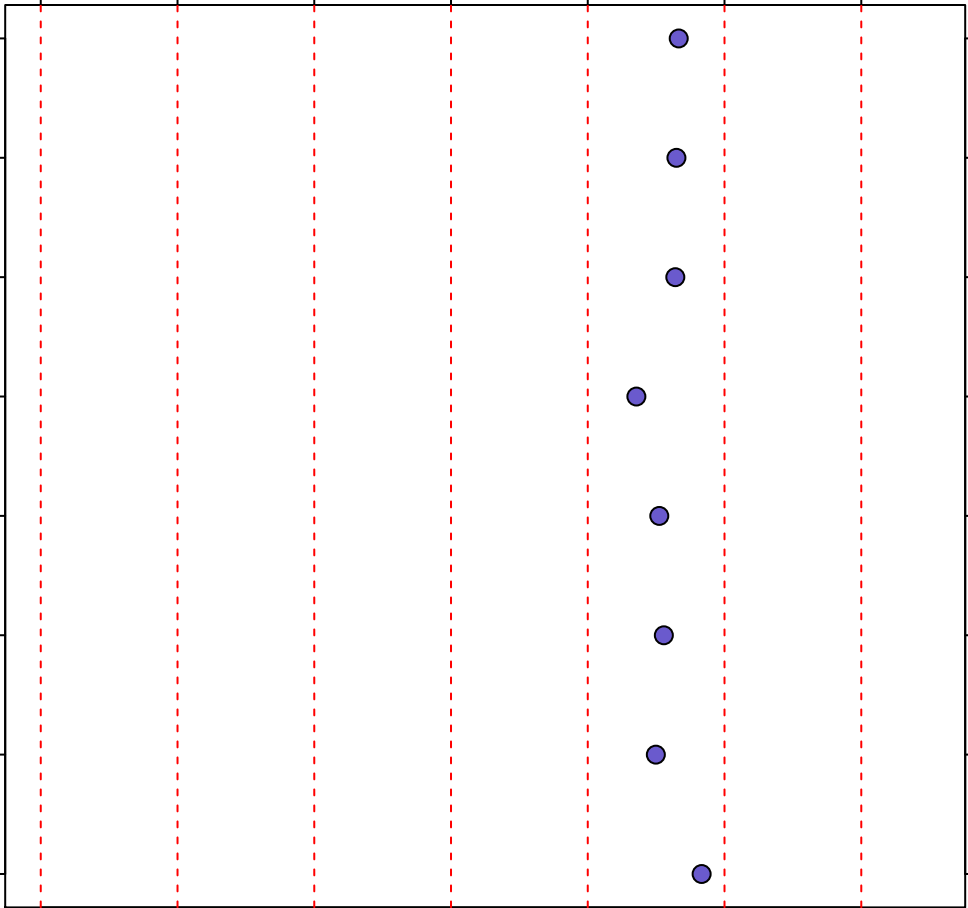

# Patient\_17 A left

'phantom least similar to TG43'

D(Y, N, B, B)

D(Y, N, B, N)

D(Y, N, B, M)

D(N, N, N, N)

D(Y, N, N, N)

D(Y, N, M, M)

D(Y, M, X, X)

D(N, M, X, X)

'phantom most similar to TG43'

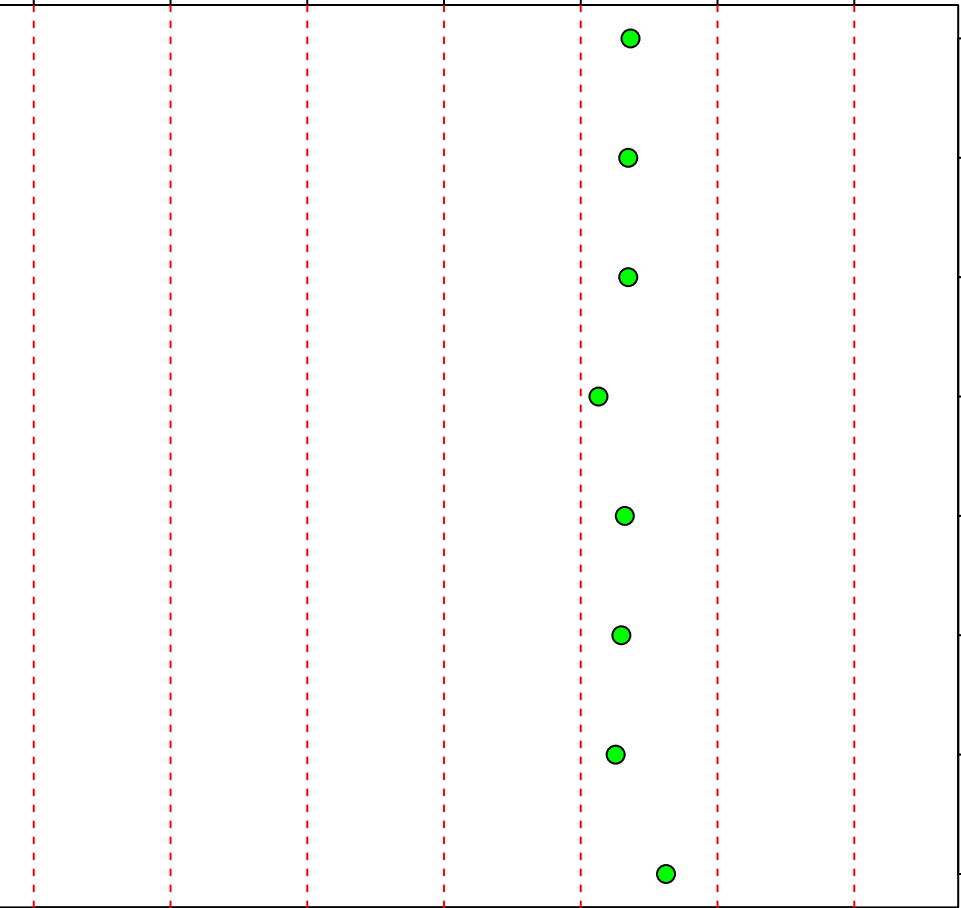

-10 -8 -6 -4 -2 0 2

%diff 100\*(GBBS-TG43)/TG43

GBBS(solid model applicator, body, balloon & rectal contrast, packing contrast)

# Patient\_18 A left

'phantom least similar to TG43'

D(Y, N, B, B)

D(Y, N, B, N)

D(Y, N, B, M)

D(N, N, N, N)

D(Y, N, N, N)

D(Y, N, M, M)

D(Y, M, X, X)

D(N, M, X, X)

'phantom most similar to TG43'

-10

-8

-6

-4

-2

0

2

%diff 100\*(GBBS-TG43)/TG43

GBBS(solid model applicator, body, balloon & rectal contrast, packing contrast)

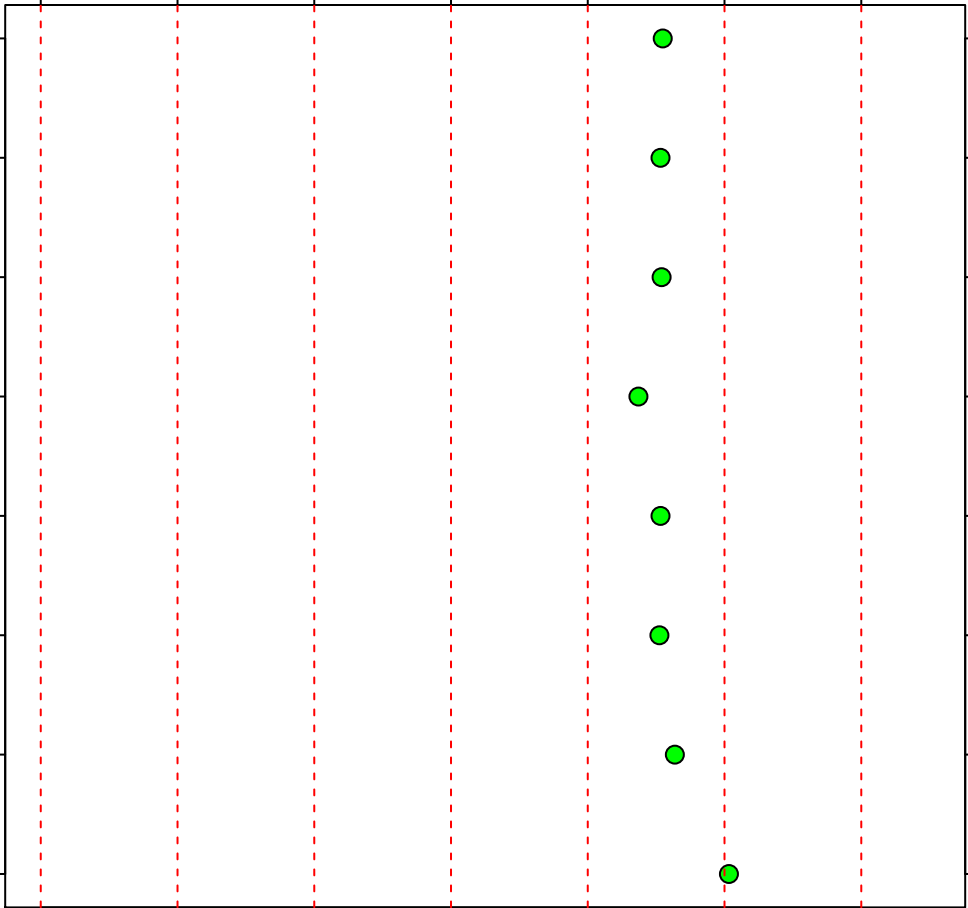

# Patient\_19 A left

'phantom least similar to TG43'

D(Y, N, B, B)

D(Y, N, B, N)

D(Y, N, B, M)

D(N, N, N, N)

D(Y, N, N, N)

D(Y, N, M, M)

D(Y, M, X, X)

D(N, M, X, X)

'phantom most similar to TG43'

-10

-8

-6

-4

-2

0

2

%diff 100\*(GBBS-TG43)/TG43

GBBS(solid model applicator, body, balloon & rectal contrast, packing contrast)

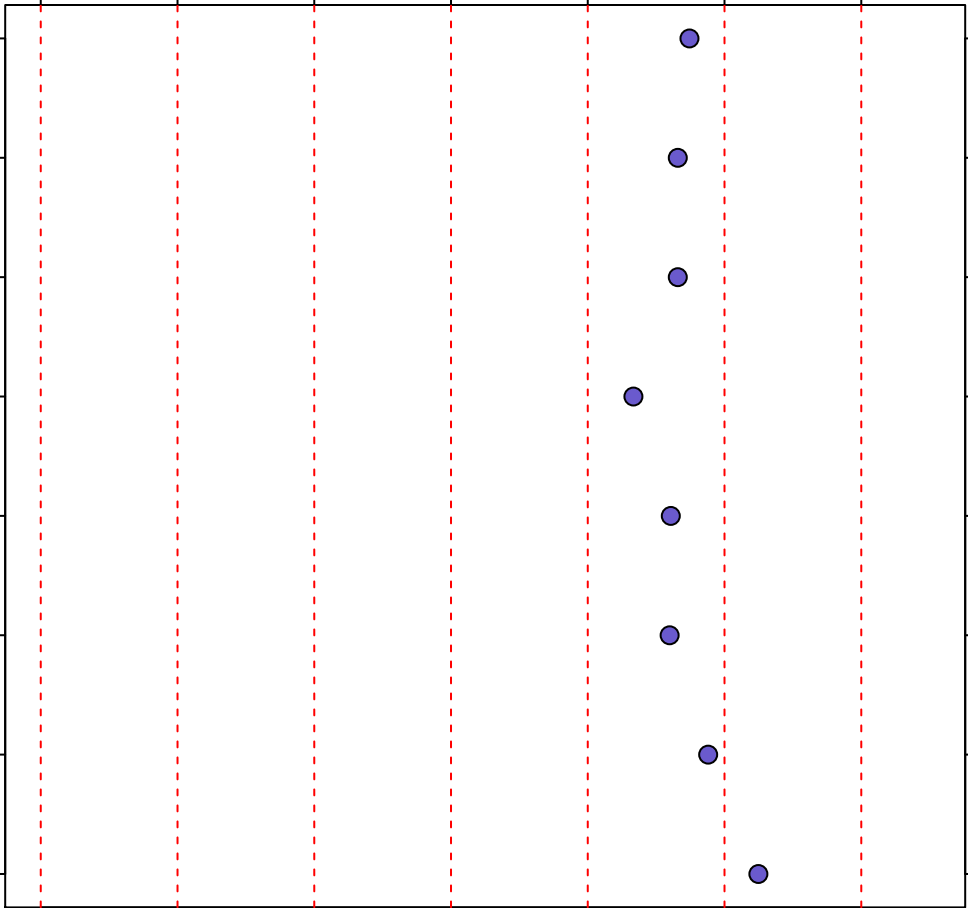

# Patient\_20 A left

'phantom least similar to TG43'

D(Y, N, B, B)

D(Y, N, B, N)

D(Y, N, B, M)

D(N, N, N, N)

D(Y, N, N, N)

D(Y, N, M, M)

D(Y, M, X, X)

D(N, M, X, X)

'phantom most similar to TG43'

-10 -8 -6 -4 -2 0 2

%diff 100\*(GBBS-TG43)/TG43

GBBS(solid model applicator, body, balloon & rectal contrast, packing contrast)

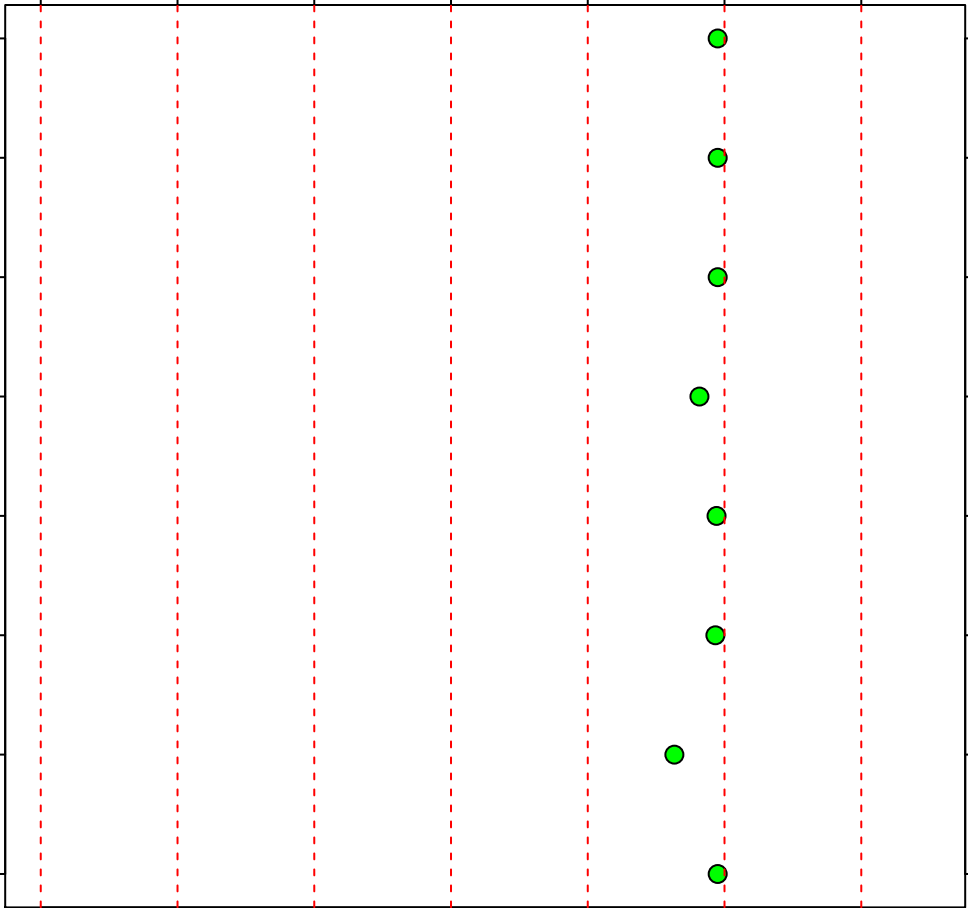

# Patient\_21 A left

'phantom least similar to TG43'

D(Y, N, B, B)

D(Y, N, B, N)

D(Y, N, B, M)

D(N, N, N, N)

D(Y, N, N, N)

D(Y, N, M, M)

D(Y, M, X, X)

D(N, M, X, X)

'phantom most similar to TG43'

-10

-8

-6

-4

-2

0

2

%diff 100\*(GBBS-TG43)/TG43

GBBS(solid model applicator, body, balloon & rectal contrast, packing contrast)

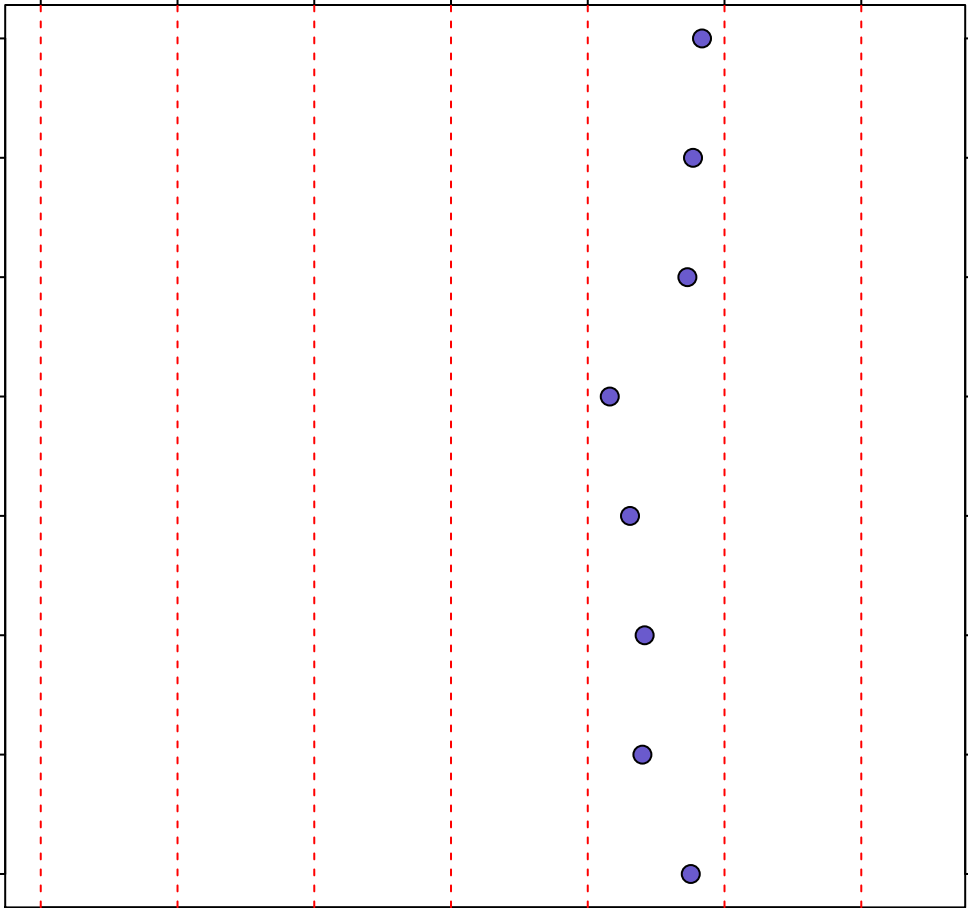

# Patient\_22 A left

'phantom least similar to TG43'

D(Y, N, B, B)

D(Y, N, B, N)

D(Y, N, B, M)

D(N, N, N, N)

D(Y, N, N, N)

D(Y, N, M, M)

D(Y, M, X, X)

D(N, M, X, X)

'phantom most similar to TG43'

-10 -8 -6 -4 -2 0 2

%diff 100\*(GBBS-TG43)/TG43

GBBS(solid model applicator, body, balloon & rectal contrast, packing contrast)

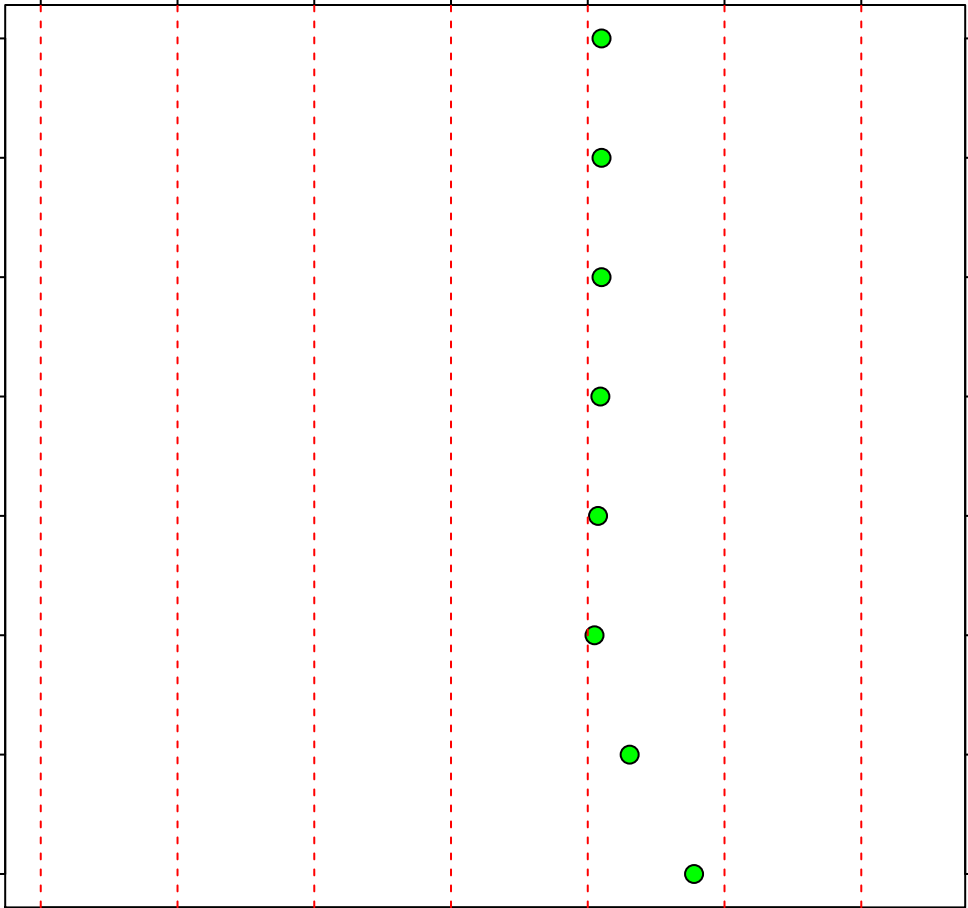

# Patient\_23 A left

'phantom least similar to TG43'

D(Y, N, B, B)

D(Y, N, B, N)

D(Y, N, B, M)

D(N, N, N, N)

D(Y, N, N, N)

D(Y, N, M, M)

D(Y, M, X, X)

D(N, M, X, X)

'phantom most similar to TG43'

-10

-8

-6

-4

-2

0

2

%diff 100\*(GBBS-TG43)/TG43

GBBS(solid model applicator, body, balloon & rectal contrast, packing contrast)

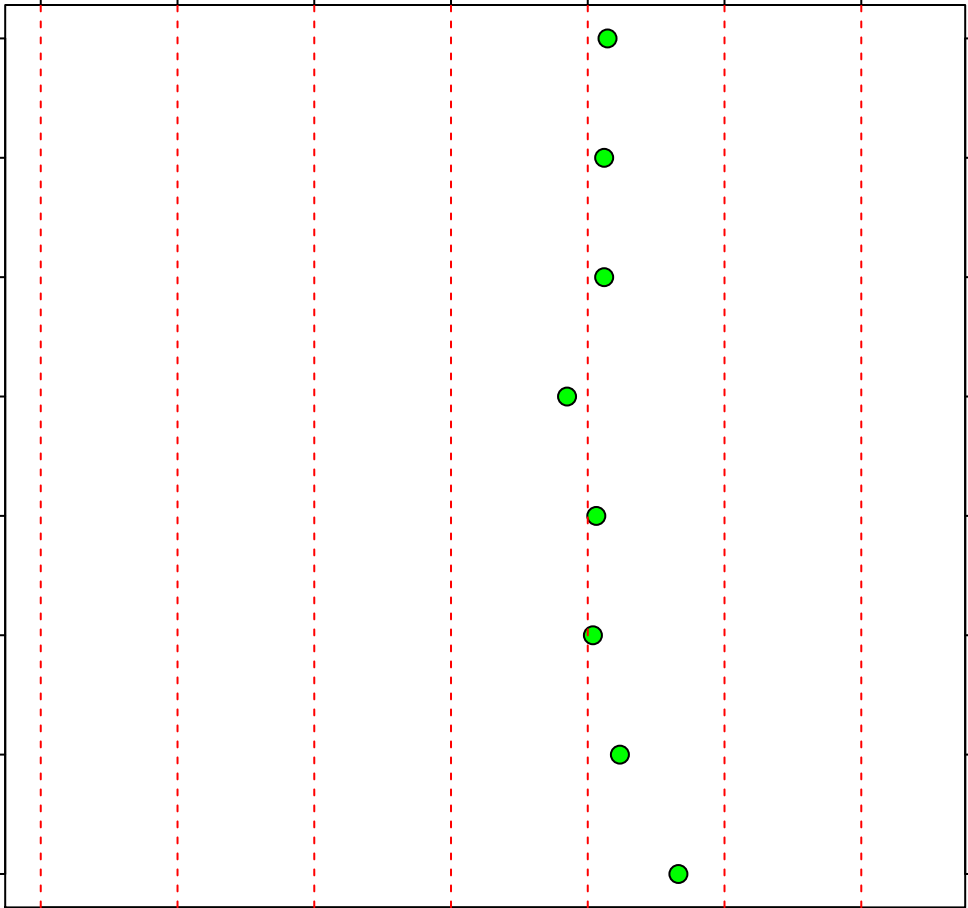



# Patient\_24 A left

'phantom least similar to TG43'

D(Y, N, B, B)

D(Y, N, B, N)

D(Y, N, B, M)

D(N, N, N, N)

D(Y, N, N, N)

D(Y, N, M, M)

D(Y, M, X, X)

D(N, M, X, X)

'phantom most similar to TG43'

-10

-8

-6

-4

-2

0

2

%diff 100\*(GBBS-TG43)/TG43

GBBS(solid model applicator, body, balloon & rectal contrast, packing contrast)

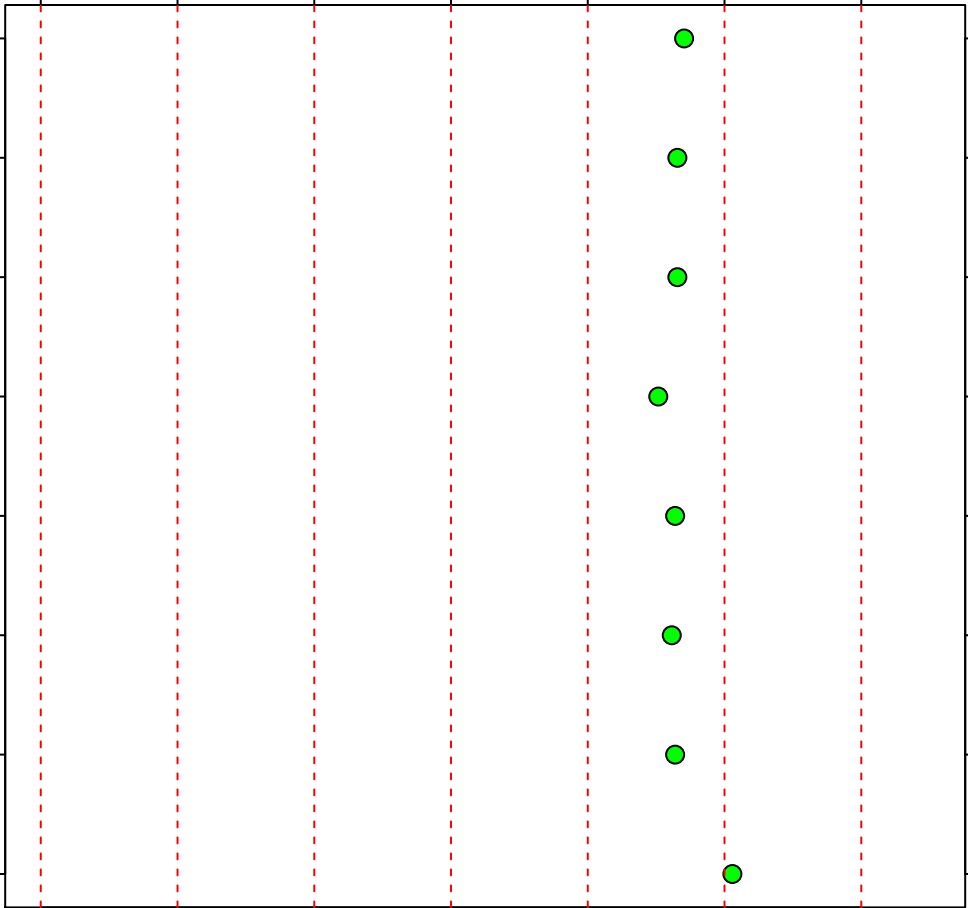

# Patient\_25 A left

'phantom least similar to TG43'

- D(Y, N, B, B)
- D(Y, N, B, N)
- D(Y, N, B, M)
- D(N, N, N, N)
- D(Y, N, N, N)
- D(Y, N, M, M)
- D(Y, M, X, X)
- D(N, M, X, X)

'phantom most similar to TG43'

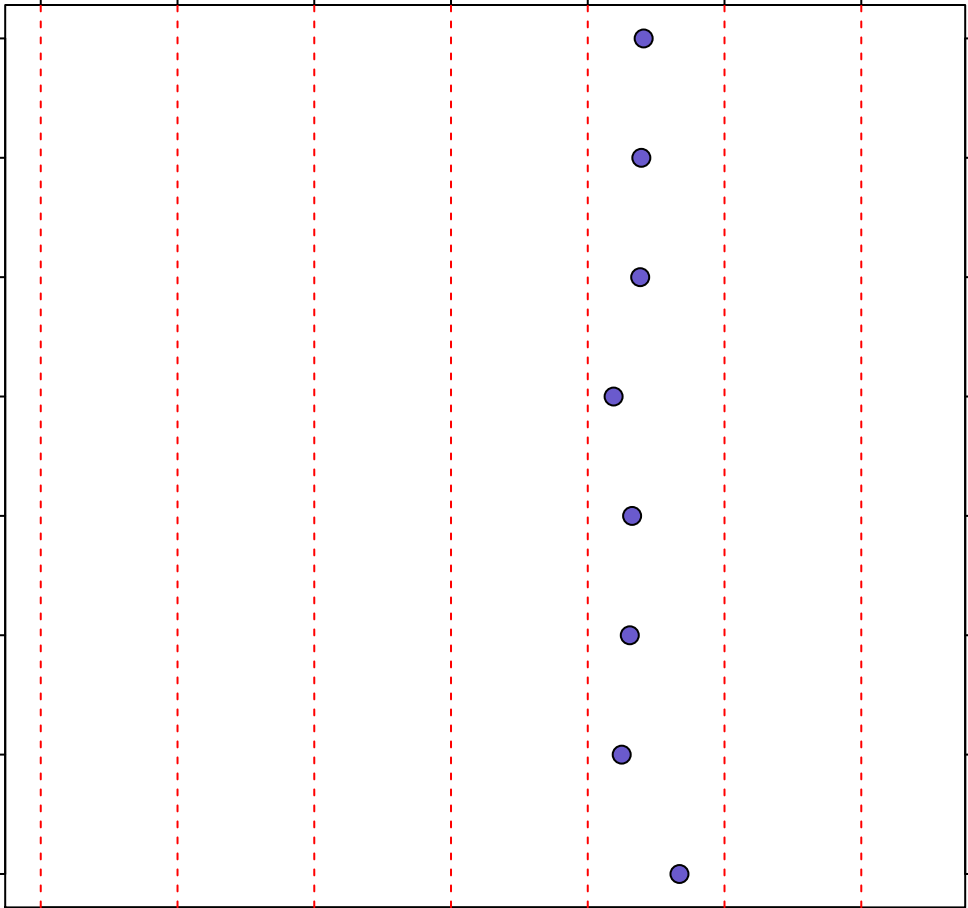

-10 -8 -6 -4 -2 0 2

%diff 100\*(GBBS-TG43)/TG43

GBBS(solid model applicator, body, balloon & rectal contrast, packing contrast)

# Patient\_26 A left

'phantom least similar to TG43'

- D(Y, N, B, B)
- D(Y, N, B, N)
- D(Y, N, B, M)
- D(N, N, N, N)
- D(Y, N, N, N)
- D(Y, N, M, M)
- D(Y, M, X, X)
- D(N, M, X, X)

'phantom most similar to TG43'

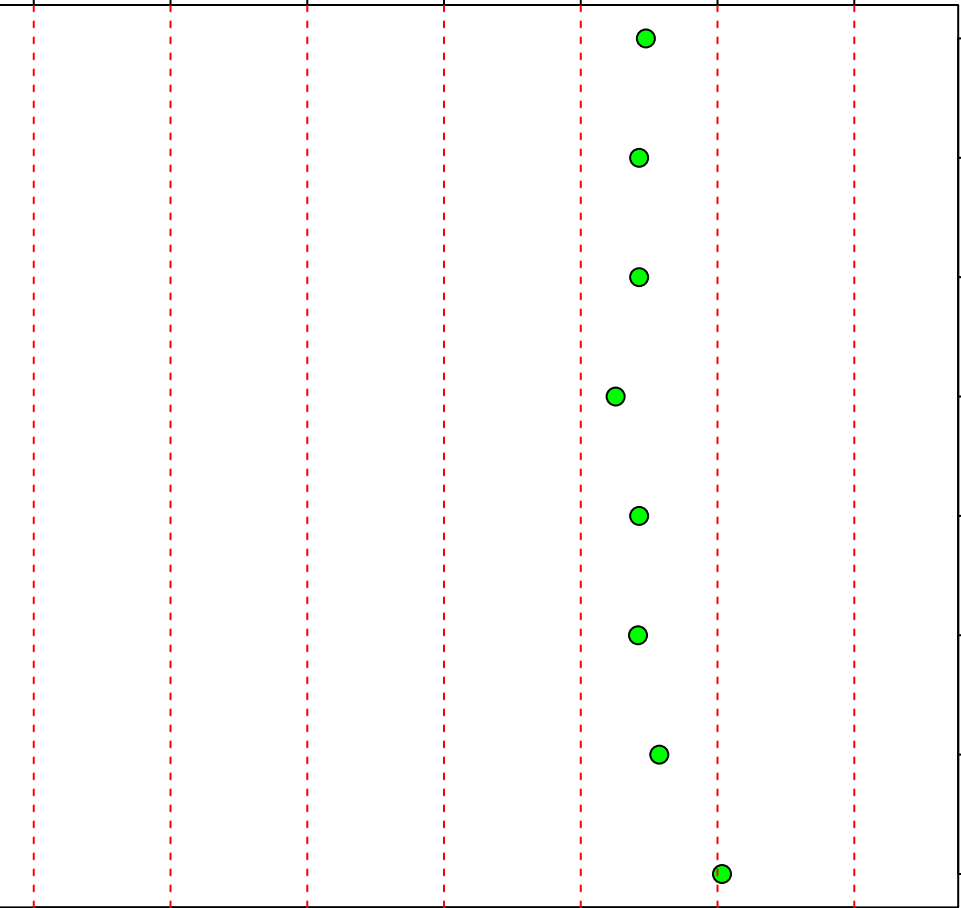

-10 -8 -6 -4 -2 0 2

%diff 100\*(GBBS-TG43)/TG43

GBBS(solid model applicator, body, balloon & rectal contrast, packing contrast)

# Patient\_01 A right

'phantom least similar to TG43'

D(Y, N, B, B)

D(Y, N, B, N)

D(Y, N, B, M)

D(N, N, N, N)

D(Y, N, N, N)

D(Y, N, M, M)

D(Y, M, X, X)

D(N, M, X, X)

'phantom most similar to TG43'

-10

-8

-6

-4

-2

0

2

%diff 100\*(GBBS-TG43)/TG43

GBBS(solid model applicator, body, balloon & rectal contrast, packing contrast)

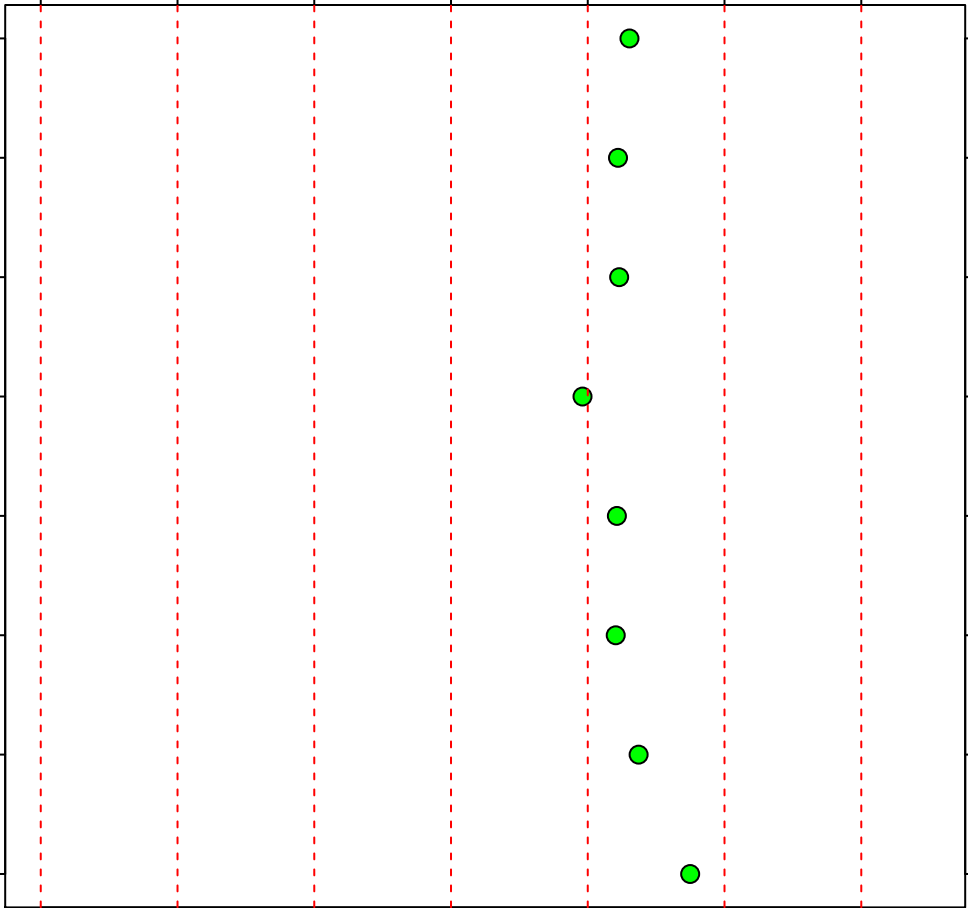

# Patient\_02 A right

'phantom least similar to TG43'

D(Y, N, B, B)

D(Y, N, B, N)

D(Y, N, B, M)

D(N, N, N, N)

D(Y, N, N, N)

D(Y, N, M, M)

D(Y, M, X, X)

D(N, M, X, X)

'phantom most similar to TG43'

-10 -8 -6 -4 -2 0 2

%diff 100\*(GBBS-TG43)/TG43

GBBS(solid model applicator, body, balloon & rectal contrast, packing contrast)

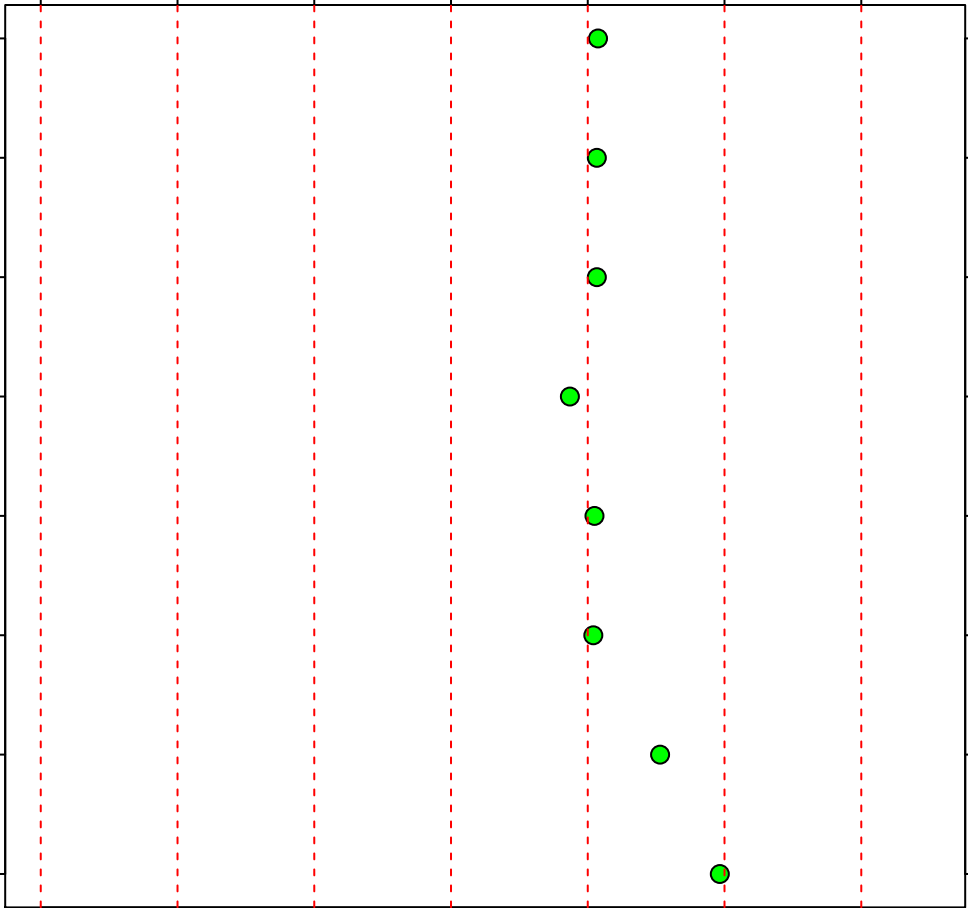

# Patient\_03 A right

'phantom least similar to TG43'

D(Y, N, B, B)

D(Y, N, B, N)

D(Y, N, B, M)

D(N, N, N, N)

D(Y, N, N, N)

D(Y, N, M, M)

D(Y, M, X, X)

D(N, M, X, X)

'phantom most similar to TG43'

-10

-8

-6

-4

-2

0

2

%diff 100\*(GBBS-TG43)/TG43

GBBS(solid model applicator, body, balloon & rectal contrast, packing contrast)

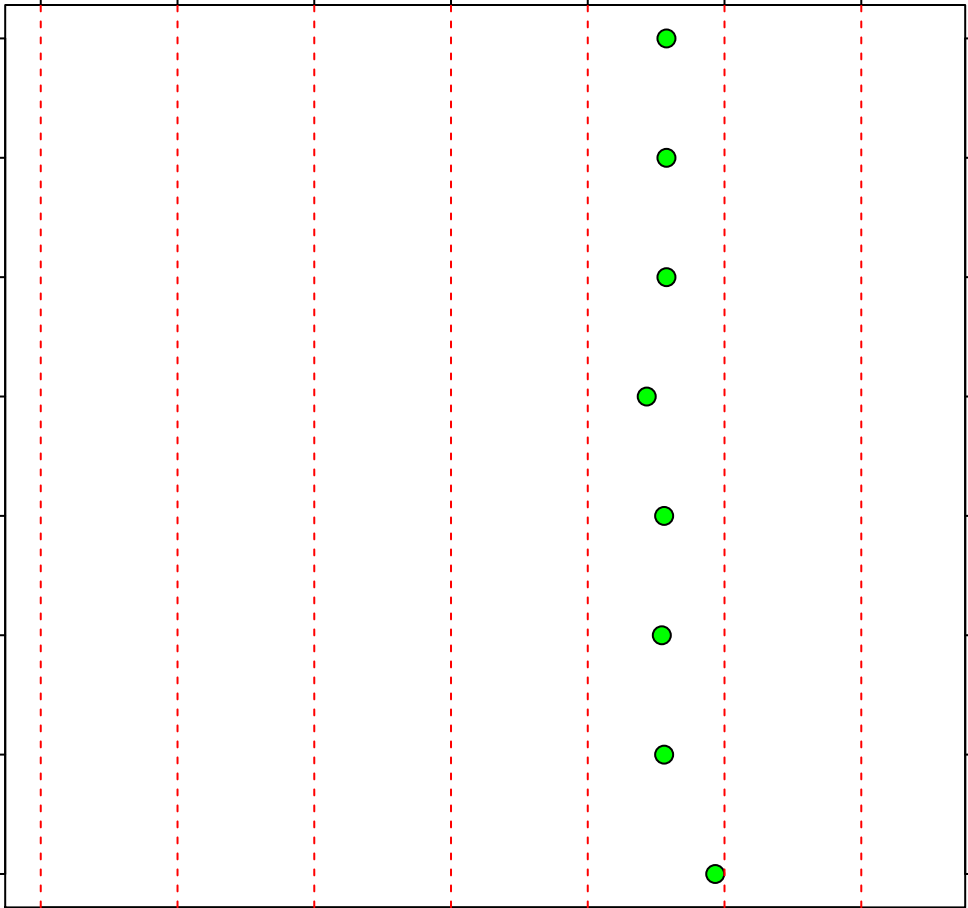

# Patient\_04 A right

'phantom least similar to TG43'

D(Y, N, B, B)

D(Y, N, B, N)

D(Y, N, B, M)

D(N, N, N, N)

D(Y, N, N, N)

D(Y, N, M, M)

D(Y, M, X, X)

D(N, M, X, X)

'phantom most similar to TG43'

-10

-8

-6

-4

-2

0

2

%diff 100\*(GBBS-TG43)/TG43

GBBS(solid model applicator, body, balloon & rectal contrast, packing contrast)

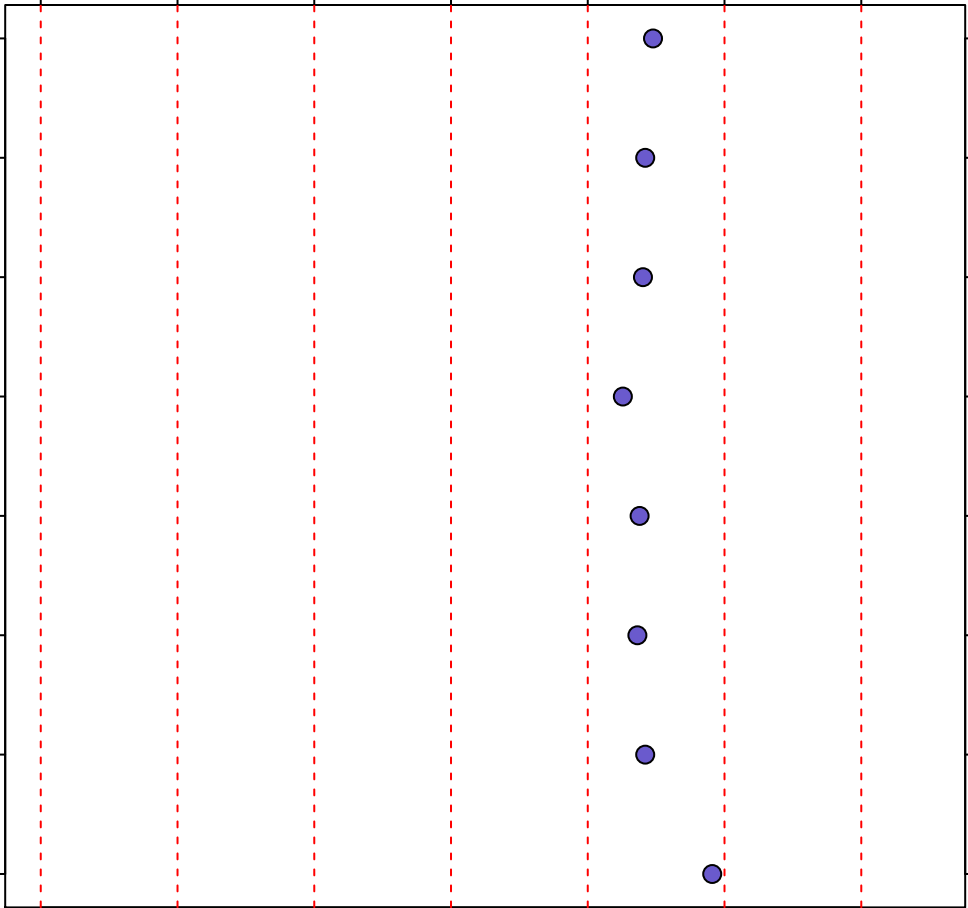

# Patient\_05 A right

'phantom least similar to TG43'

- D(Y, N, B, B)
- D(Y, N, B, N)
- D(Y, N, B, M)
- D(N, N, N, N)
- D(Y, N, N, N)
- D(Y, N, M, M)
- D(Y, M, X, X)
- D(N, M, X, X)

'phantom most similar to TG43'

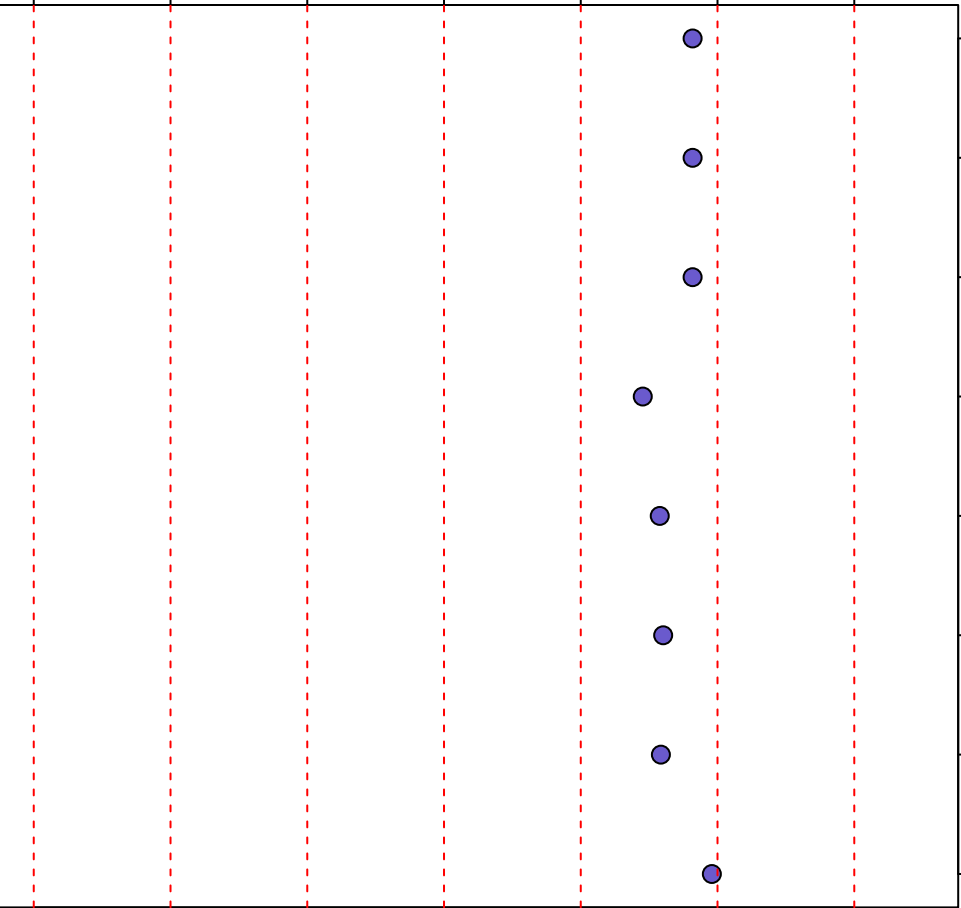

%diff 100\*(GBBS-TG43)/TG43

GBBS(solid model applicator, body, balloon & rectal contrast, packing contrast)



# Patient\_06 A right

'phantom least similar to TG43'

D(Y, N, B, B)

D(Y, N, B, N)

D(Y, N, B, M)

D(N, N, N, N)

D(Y, N, N, N)

D(Y, N, M, M)

D(Y, M, X, X)

D(N, M, X, X)

'phantom most similar to TG43'

-10

-8

-6

-4

-2

0

2

%diff 100\*(GBBS-TG43)/TG43

GBBS(solid model applicator, body, balloon & rectal contrast, packing contrast)

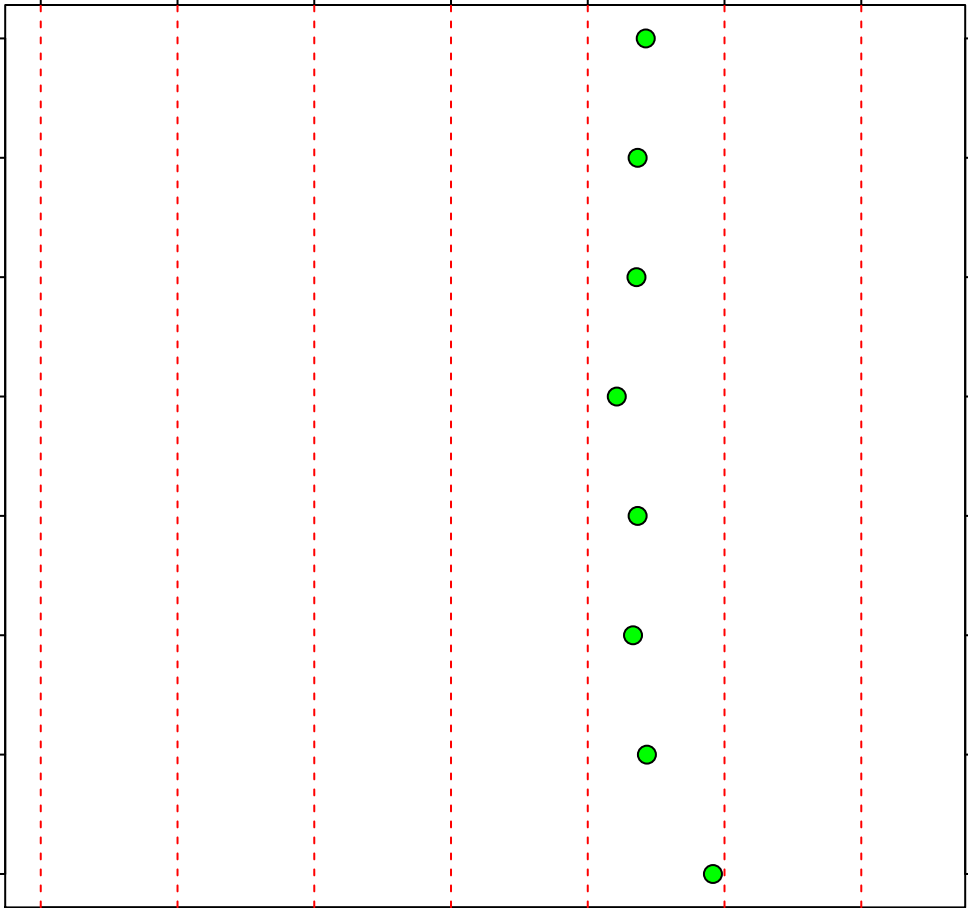

# Patient\_07 A right

'phantom least similar to TG43'

D(Y, N, B, B)

D(Y, N, B, N)

D(Y, N, B, M)

D(N, N, N, N)

D(Y, N, N, N)

D(Y, N, M, M)

D(Y, M, X, X)

D(N, M, X, X)

'phantom most similar to TG43'

-10

-8

-6

-4

-2

0

2

%diff 100\*(GBBS-TG43)/TG43

GBBS(solid model applicator, body, balloon & rectal contrast, packing contrast)

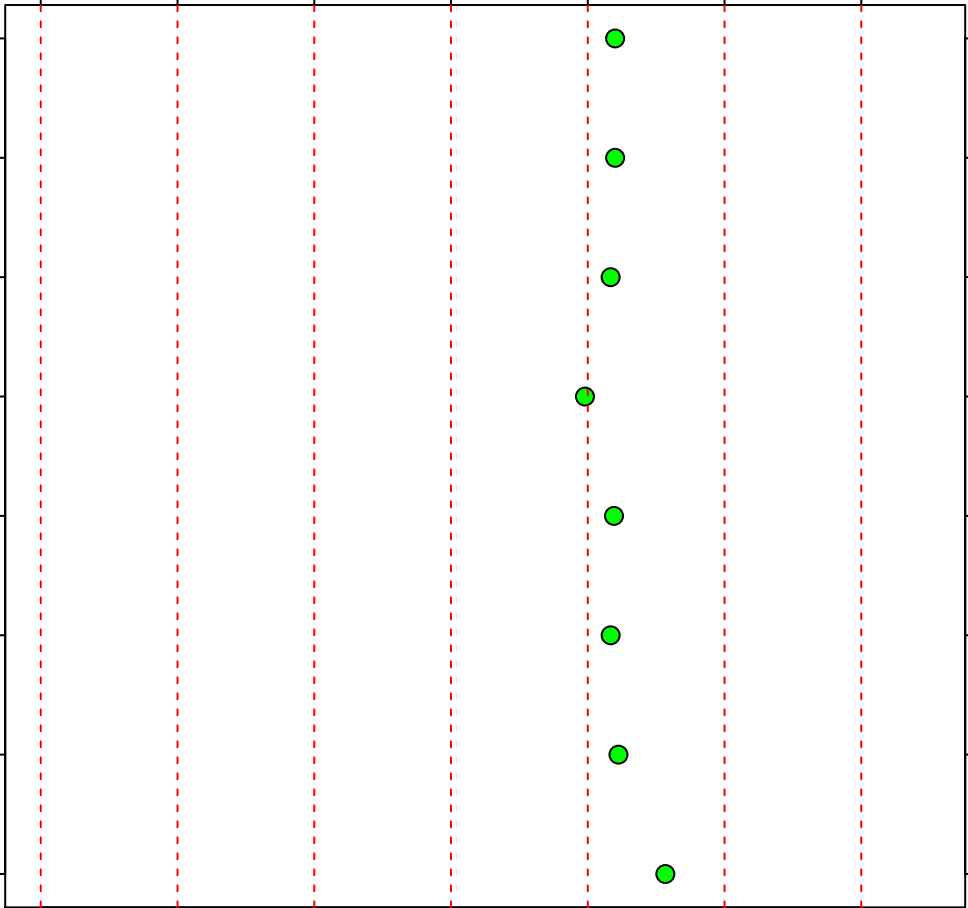

# Patient\_08 A right

'phantom least similar to TG43'

D(Y, N, B, B)

D(Y, N, B, N)

D(Y, N, B, M)

D(N, N, N, N)

D(Y, N, N, N)

D(Y, N, M, M)

D(Y, M, X, X)

D(N, M, X, X)

'phantom most similar to TG43'

-10

-8

-6

-4

-2

0

2

%diff 100\*(GBBS-TG43)/TG43

GBBS(solid model applicator, body, balloon & rectal contrast, packing contrast)

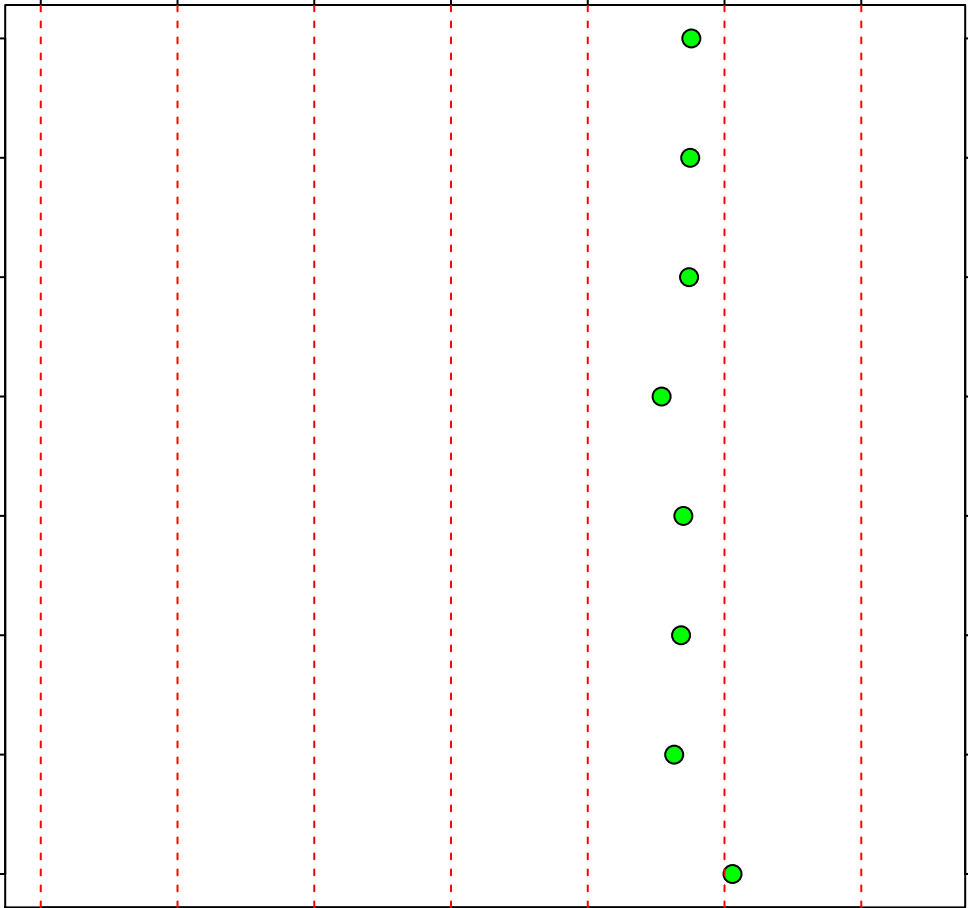

# Patient\_09 A right

'phantom least similar to TG43'

D(Y, N, B, B)

D(Y, N, B, N)

D(Y, N, B, M)

D(N, N, N, N)

D(Y, N, N, N)

D(Y, N, M, M)

D(Y, M, X, X)

D(N, M, X, X)

'phantom most similar to TG43'

-10 -8 -6 -4 -2 0 2

%diff 100\*(GBBS-TG43)/TG43

GBBS(solid model applicator, body, balloon & rectal contrast, packing contrast)

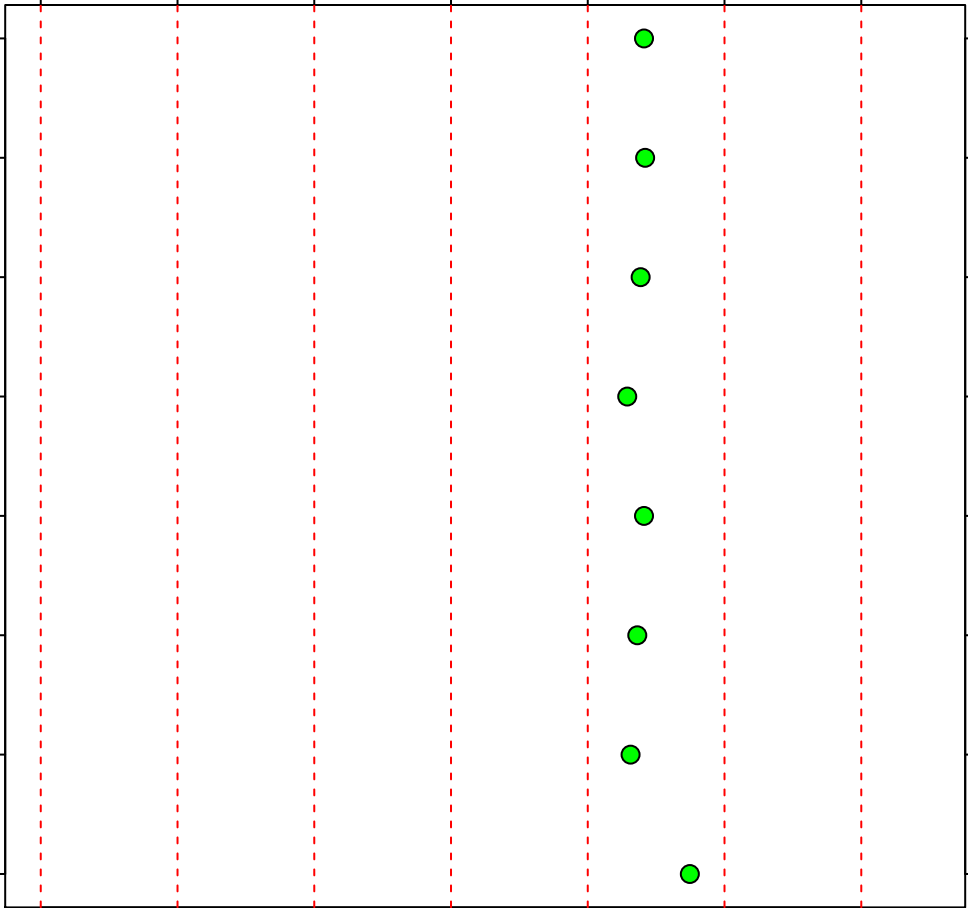

# Patient\_10 A right

'phantom least similar to TG43'

D(Y, N, B, B)

D(Y, N, B, N)

D(Y, N, B, M)

D(N, N, N, N)

D(Y, N, N, N)

D(Y, N, M, M)

D(Y, M, X, X)

D(N, M, X, X)

'phantom most similar to TG43'

-10

-8

-6

-4

-2

0

2

%diff 100\*(GBBS-TG43)/TG43

GBBS(solid model applicator, body, balloon & rectal contrast, packing contrast)

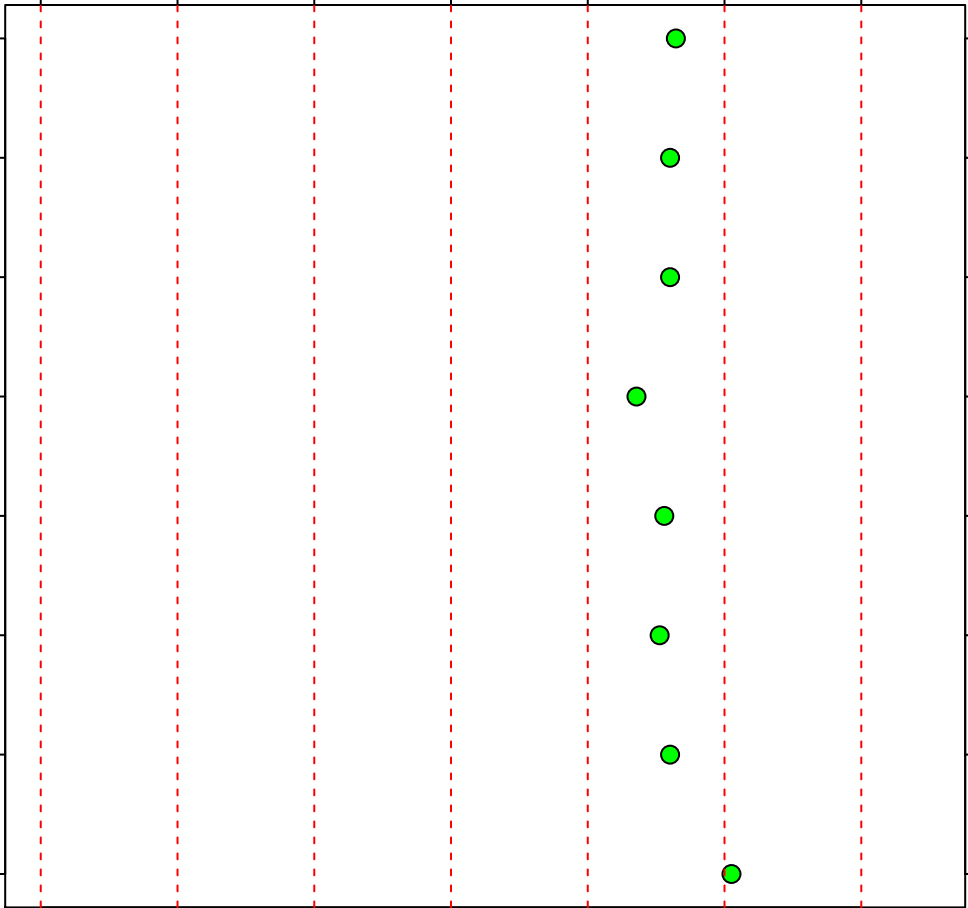

# Patient\_11 A right

'phantom least similar to TG43'

D(Y, N, B, B)

D(Y, N, B, N)

D(Y, N, B, M)

D(N, N, N, N)

D(Y, N, N, N)

D(Y, N, M, M)

D(Y, M, X, X)

D(N, M, X, X)

'phantom most similar to TG43'

-10 -8 -6 -4 -2 0 2

%diff 100\*(GBBS-TG43)/TG43

GBBS(solid model applicator, body, balloon & rectal contrast, packing contrast)

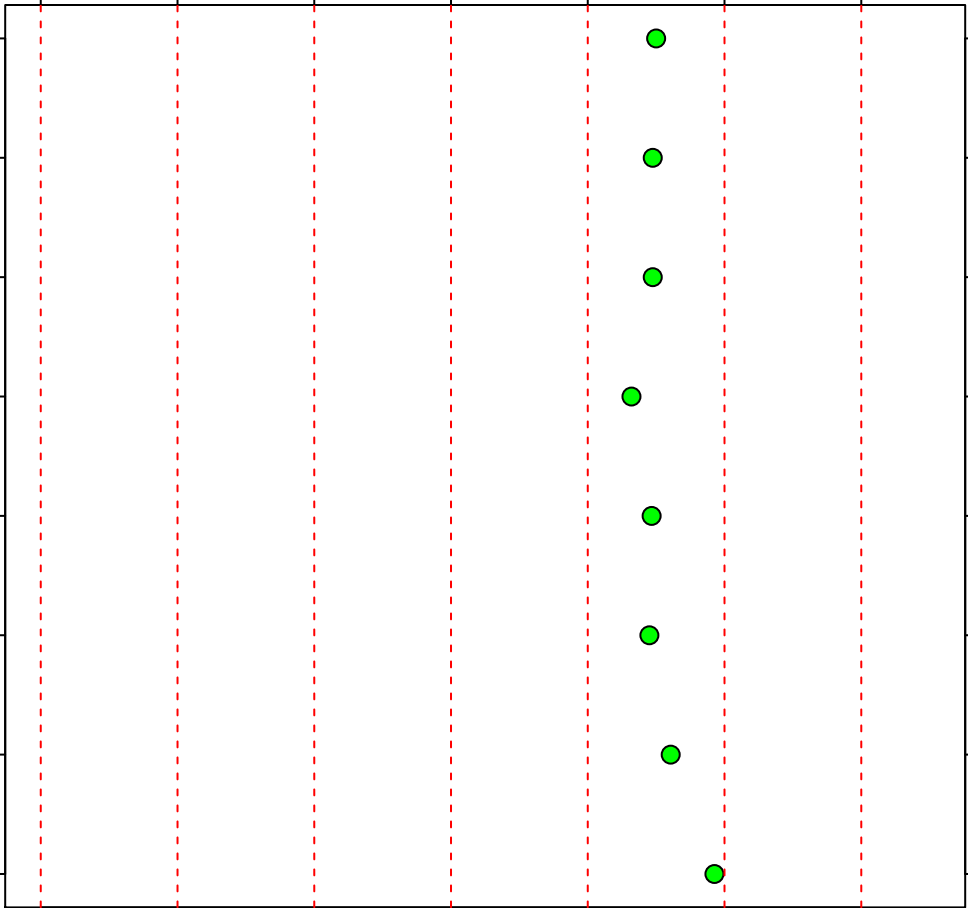

# Patient\_12 A right

'phantom least similar to TG43'

D(Y, N, B, B)

D(Y, N, B, N)

D(Y, N, B, M)

D(N, N, N, N)

D(Y, N, N, N)

D(Y, N, M, M)

D(Y, M, X, X)

D(N, M, X, X)

'phantom most similar to TG43'

-10

-8

-6

-4

-2

0

2

%diff 100\*(GBBS-TG43)/TG43

GBBS(solid model applicator, body, balloon & rectal contrast, packing contrast)

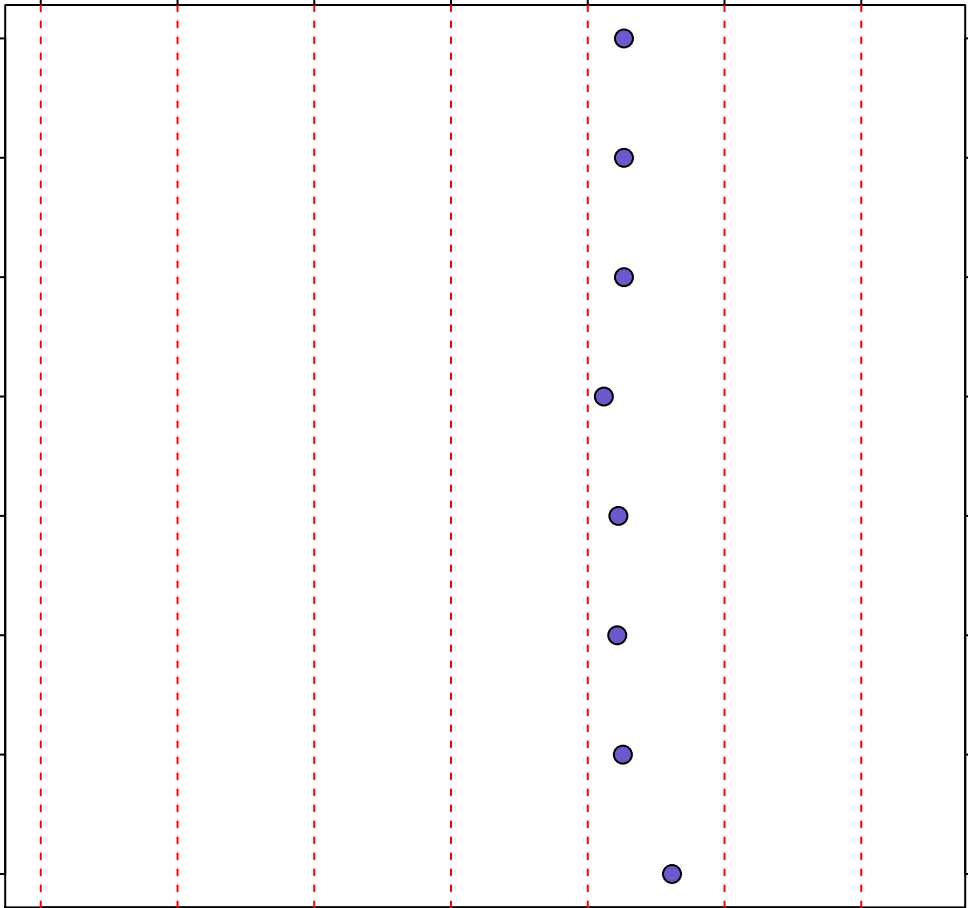

# Patient\_13 A right

'phantom least similar to TG43'

D(Y, N, B, B)

D(Y, N, B, N)

D(Y, N, B, M)

D(N, N, N, N)

D(Y, N, N, N)

D(Y, N, M, M)

D(Y, M, X, X)

D(N, M, X, X)

'phantom most similar to TG43'

-10

-8

-6

-4

-2

0

2

%diff 100\*(GBBS-TG43)/TG43

GBBS(solid model applicator, body, balloon & rectal contrast, packing contrast)

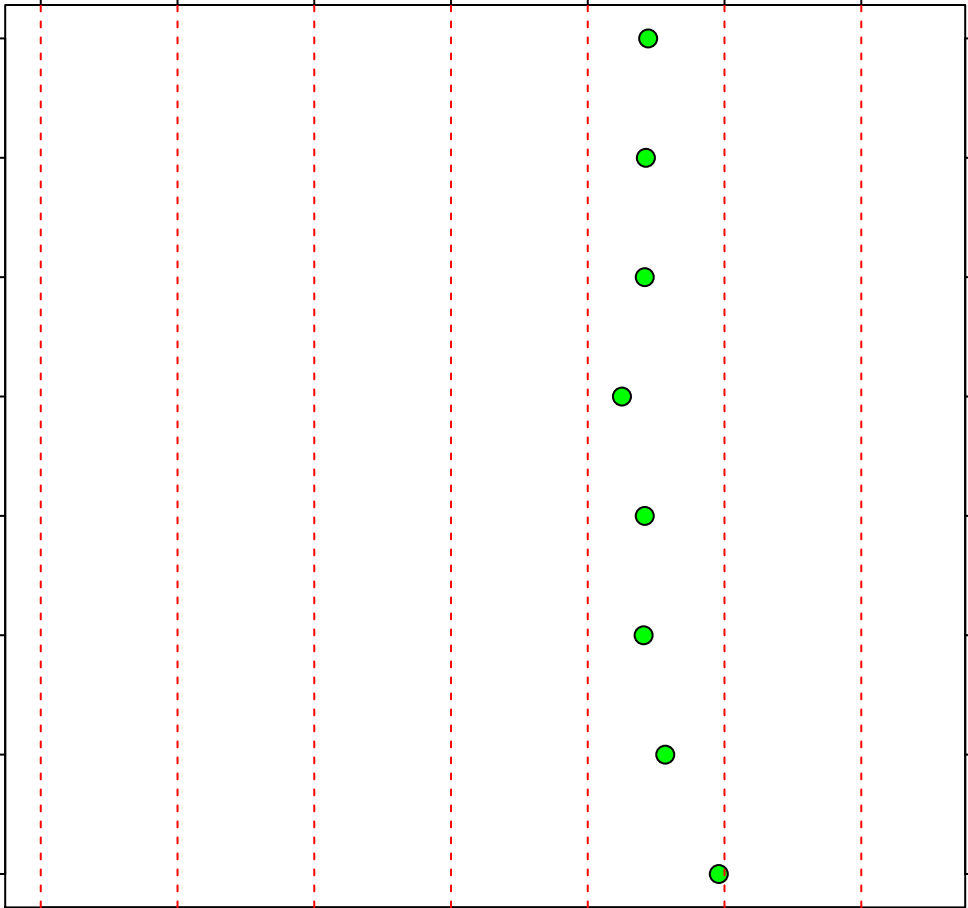



# Patient\_14 A right

'phantom least similar to TG43'

D(Y, N, B, B)

D(Y, N, B, N)

D(Y, N, B, M)

D(N, N, N, N)

D(Y, N, N, N)

D(Y, N, M, M)

D(Y, M, X, X)

D(N, M, X, X)

'phantom most similar to TG43'

-10 -8 -6 -4 -2 0 2

%diff 100\*(GBBS-TG43)/TG43

GBBS(solid model applicator, body, balloon & rectal contrast, packing contrast)

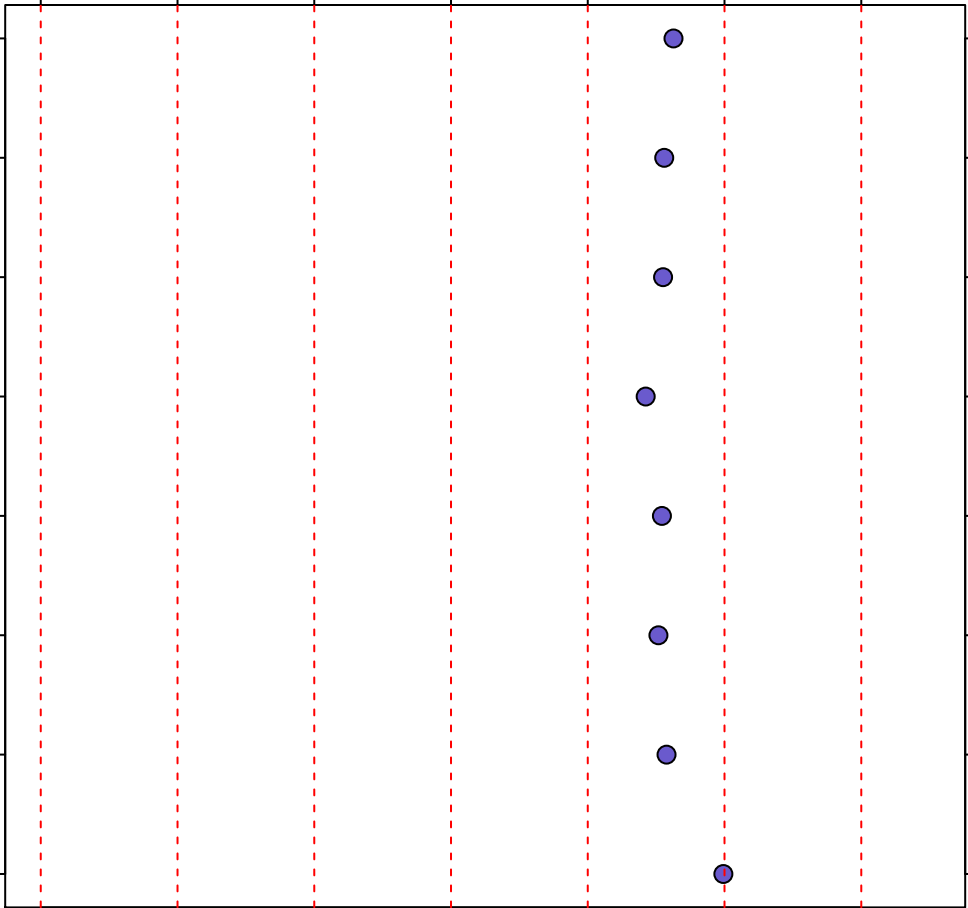

# Patient\_15 A right

'phantom least similar to TG43'

- D(Y, N, B, B)
- D(Y, N, B, N)
- D(Y, N, B, M)
- D(N, N, N, N)
- D(Y, N, N, N)
- D(Y, N, M, M)
- D(Y, M, X, X)
- D(N, M, X, X)

'phantom most similar to TG43'

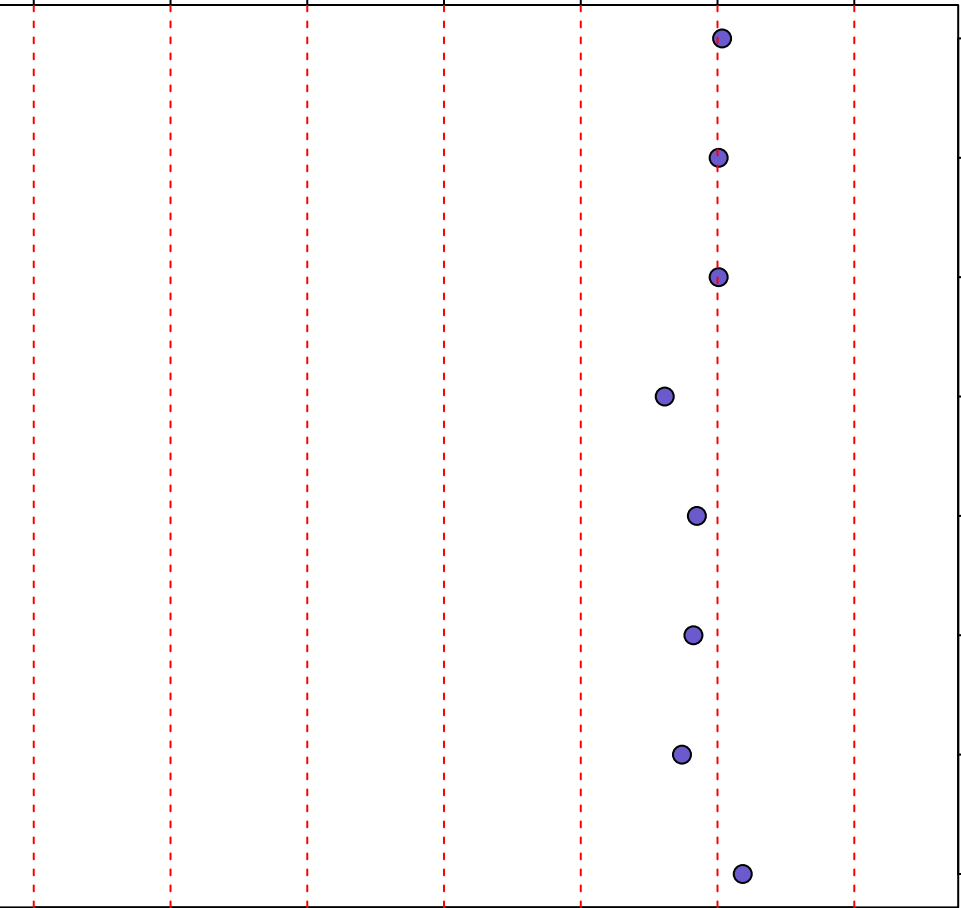

%diff 100\*(GBBS-TG43)/TG43

GBBS(solid model applicator, body, balloon & rectal contrast, packing contrast)

# Patient\_16 A right

'phantom least similar to TG43'

D(Y, N, B, B)

D(Y, N, B, N)

D(Y, N, B, M)

D(N, N, N, N)

D(Y, N, N, N)

D(Y, N, M, M)

D(Y, M, X, X)

D(N, M, X, X)

'phantom most similar to TG43'

-10

-8

-6

-4

-2

0

2

%diff 100\*(GBBS-TG43)/TG43

GBBS(solid model applicator, body, balloon & rectal contrast, packing contrast)

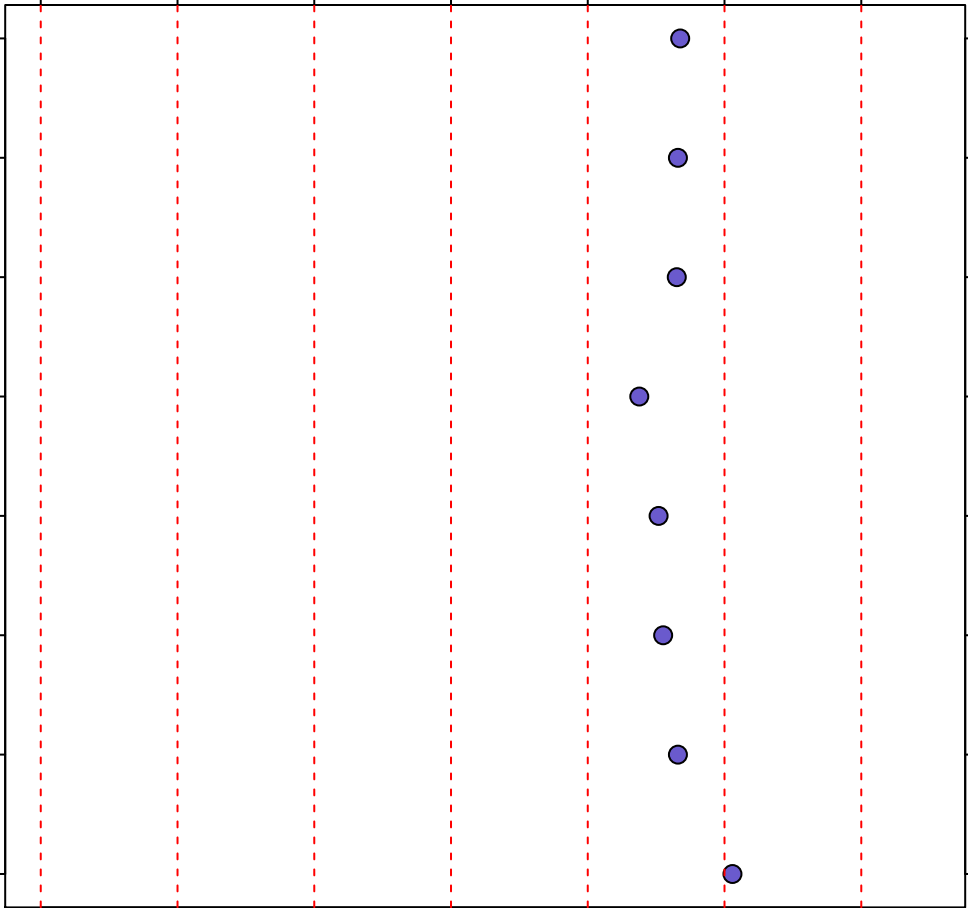

# Patient\_17 A right

'phantom least similar to TG43'

D(Y, N, B, B)

D(Y, N, B, N)

D(Y, N, B, M)

D(N, N, N, N)

D(Y, N, N, N)

D(Y, N, M, M)

D(Y, M, X, X)

D(N, M, X, X)

'phantom most similar to TG43'

-10 -8 -6 -4 -2 0 2

%diff 100\*(GBBS-TG43)/TG43

GBBS(solid model applicator, body, balloon & rectal contrast, packing contrast)

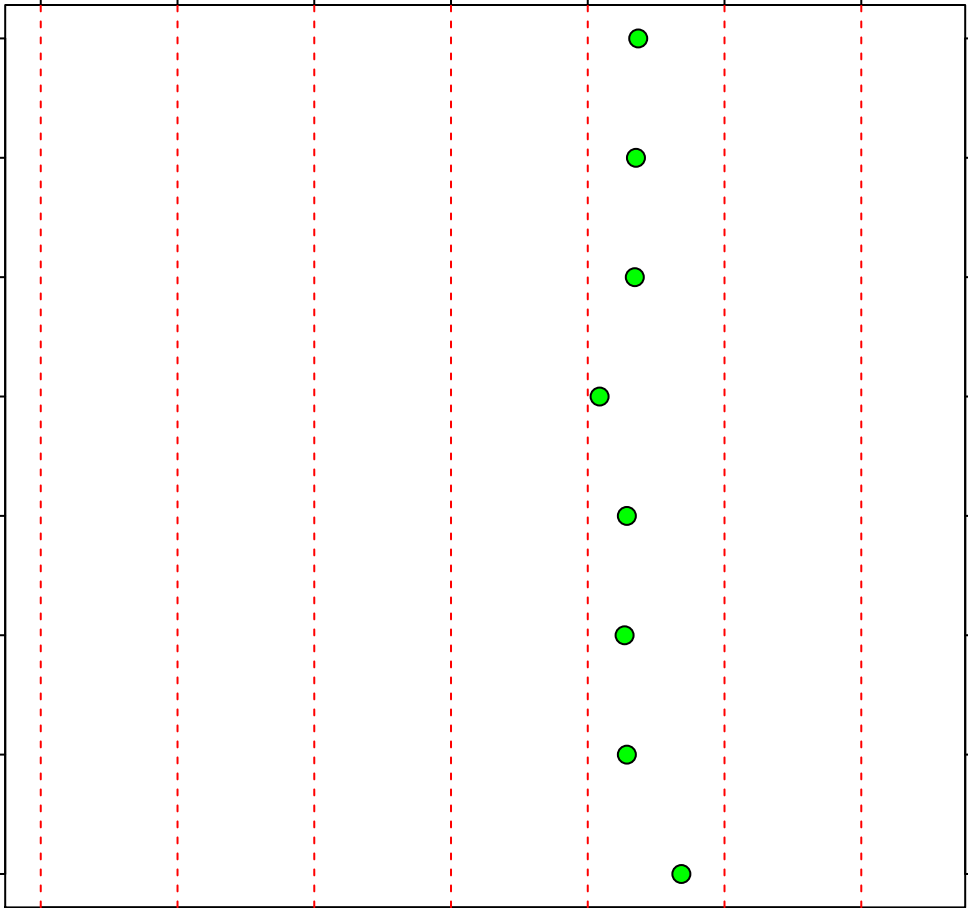

# Patient\_18 A right

'phantom least similar to TG43'

D(Y, N, B, B)

D(Y, N, B, N)

D(Y, N, B, M)

D(N, N, N, N)

D(Y, N, N, N)

D(Y, N, M, M)

D(Y, M, X, X)

D(N, M, X, X)

'phantom most similar to TG43'

-10

-8

-6

-4

-2

0

2

%diff 100\*(GBBS-TG43)/TG43

GBBS(solid model applicator, body, balloon & rectal contrast, packing contrast)

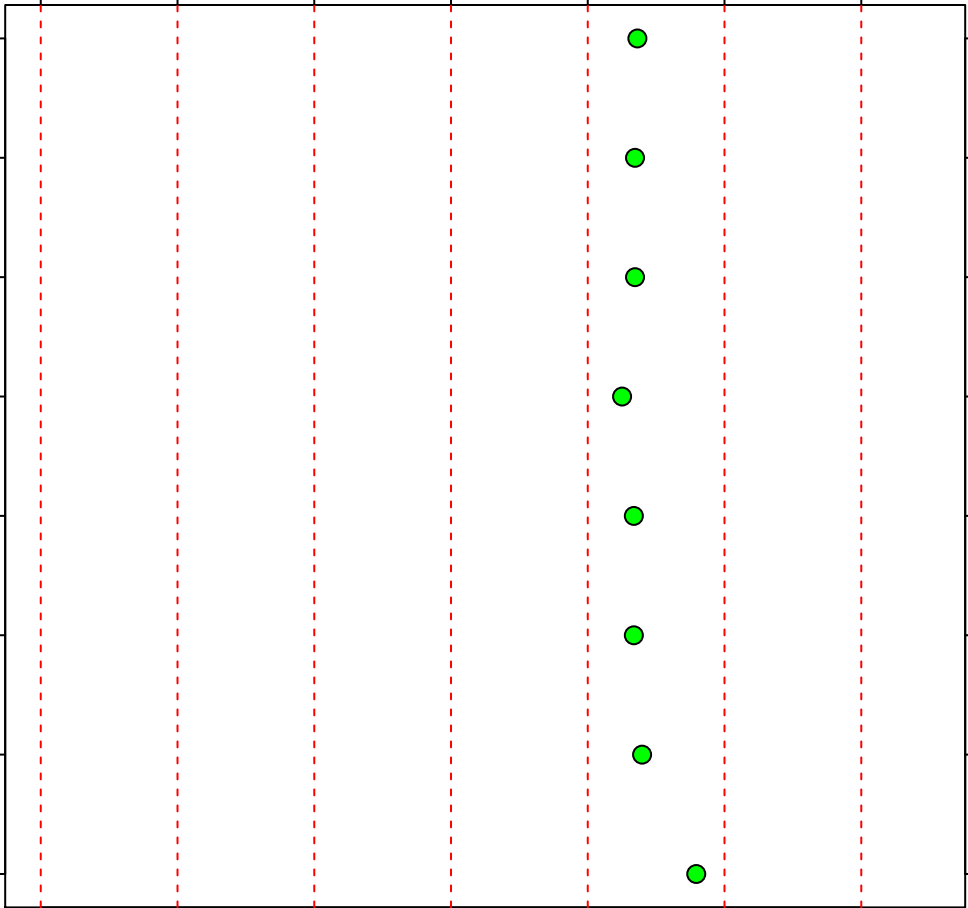

# Patient\_19 A right

'phantom least similar to TG43'

D(Y, N, B, B)

D(Y, N, B, N)

D(Y, N, B, M)

D(N, N, N, N)

D(Y, N, N, N)

D(Y, N, M, M)

D(Y, M, X, X)

D(N, M, X, X)

'phantom most similar to TG43'

-10 -8 -6 -4 -2 0 2

%diff 100\*(GBBS-TG43)/TG43

GBBS(solid model applicator, body, balloon & rectal contrast, packing contrast)

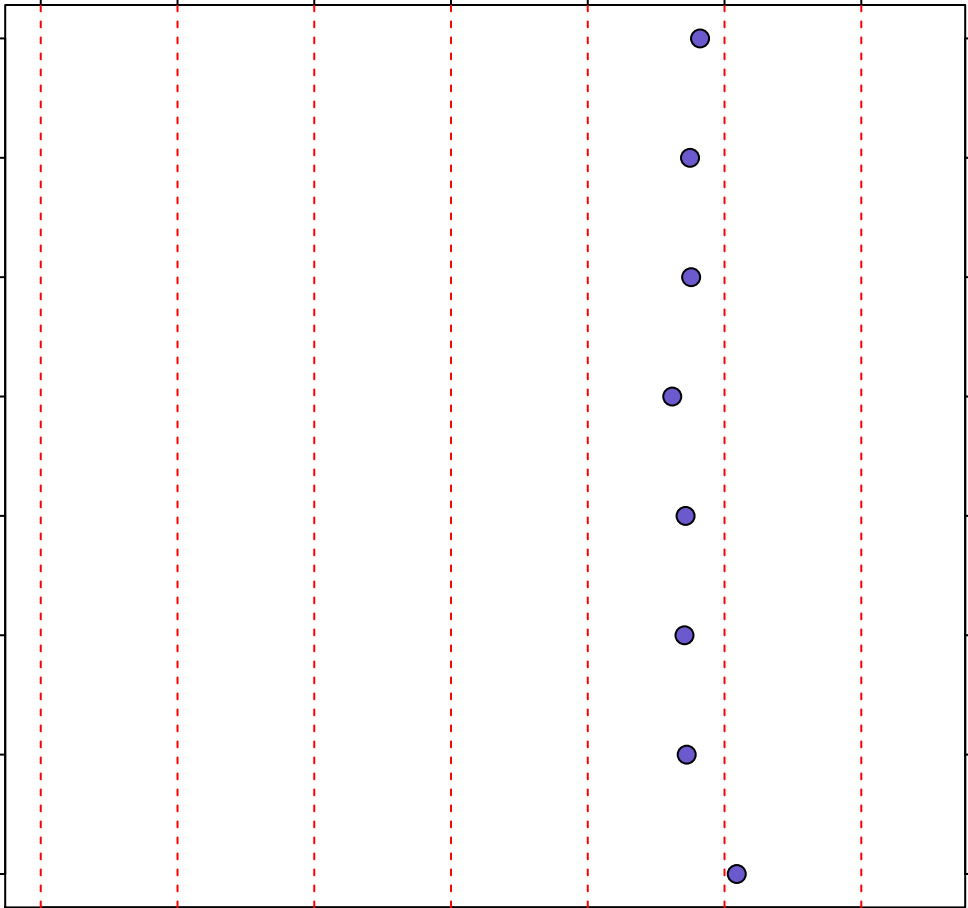

# Patient\_20 A right

'phantom least similar to TG43'

D(Y, N, B, B)

D(Y, N, B, N)

D(Y, N, B, M)

D(N, N, N, N)

D(Y, N, N, N)

D(Y, N, M, M)

D(Y, M, X, X)

D(N, M, X, X)

'phantom most similar to TG43'

-10

-8

-6

-4

-2

0

2

%diff 100\*(GBBS-TG43)/TG43

GBBS(solid model applicator, body, balloon & rectal contrast, packing contrast)

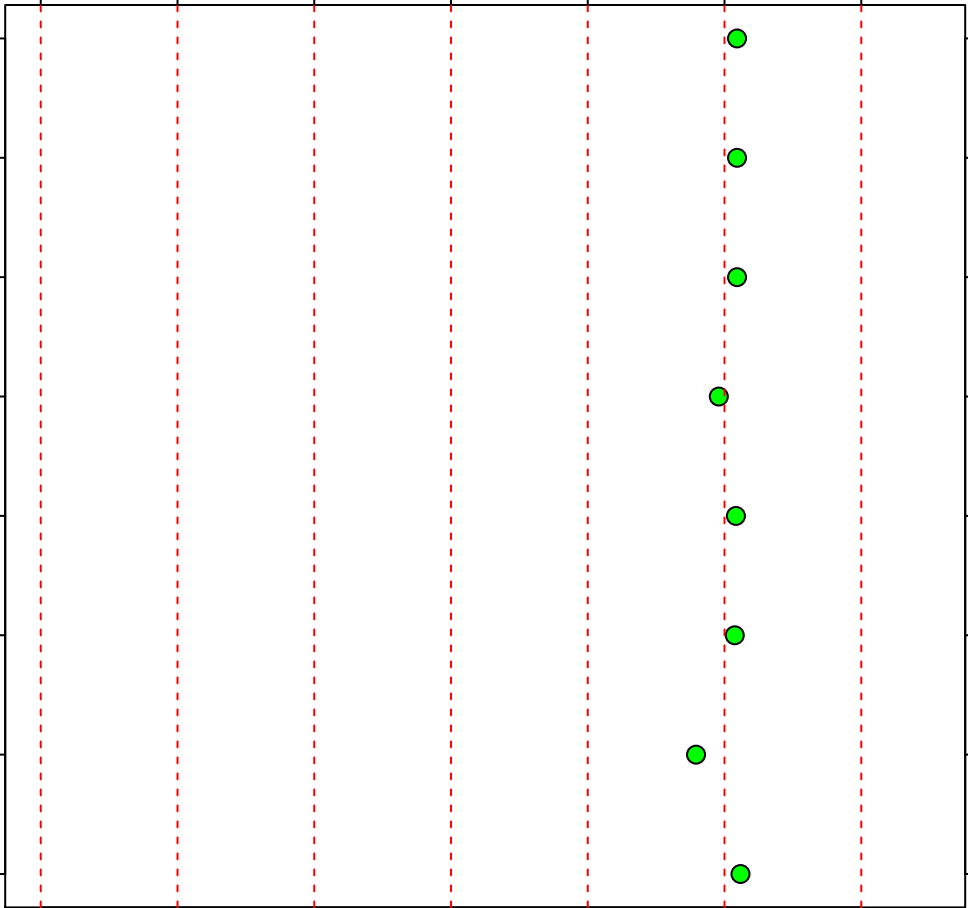

# Patient\_21 A right

'phantom least similar to TG43'

D(Y, N, B, B)

D(Y, N, B, N)

D(Y, N, B, M)

D(N, N, N, N)

D(Y, N, N, N)

D(Y, N, M, M)

D(Y, M, X, X)

D(N, M, X, X)

'phantom most similar to TG43'

-10

-8

-6

-4

-2

0

2

%diff 100\*(GBBS-TG43)/TG43

GBBS(solid model applicator, body, balloon & rectal contrast, packing contrast)

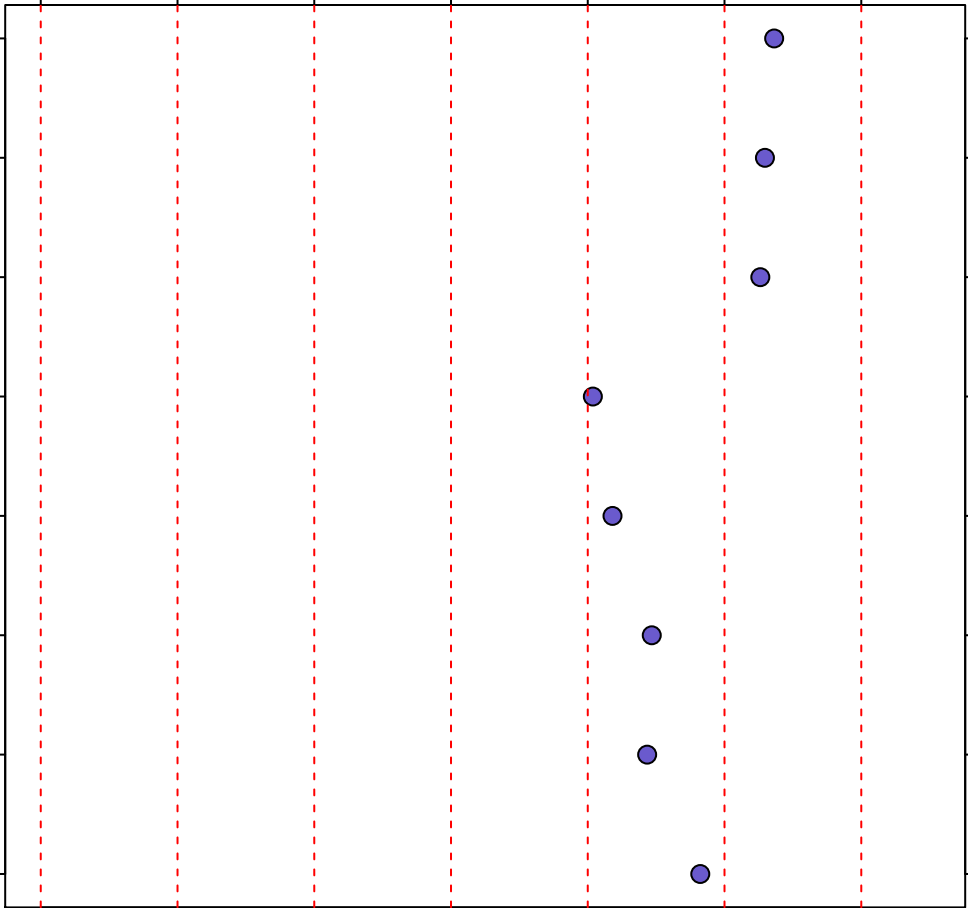



# Patient\_22 A right

'phantom least similar to TG43'

D(Y, N, B, B)

D(Y, N, B, N)

D(Y, N, B, M)

D(N, N, N, N)

D(Y, N, N, N)

D(Y, N, M, M)

D(Y, M, X, X)

D(N, M, X, X)

'phantom most similar to TG43'

-10 -8 -6 -4 -2 0 2

%diff 100\*(GBBS-TG43)/TG43

GBBS(solid model applicator, body, balloon & rectal contrast, packing contrast)

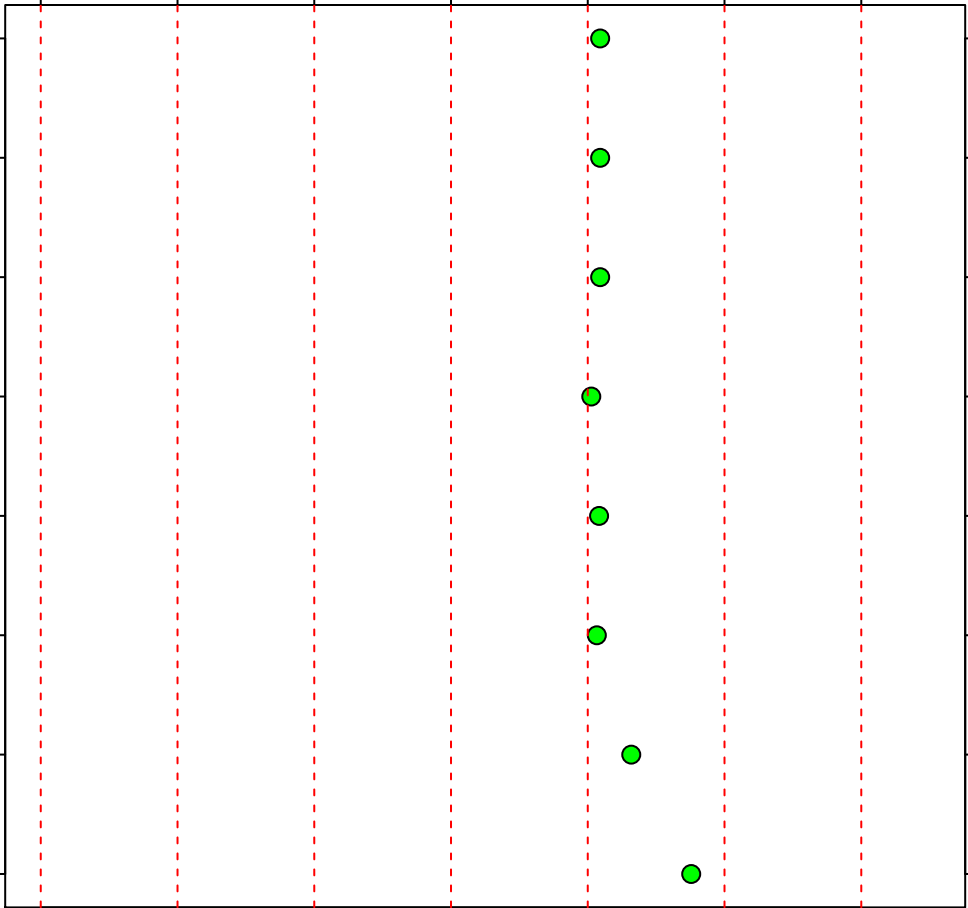

# Patient\_23 A right

'phantom least similar to TG43'

D(Y, N, B, B)

D(Y, N, B, N)

D(Y, N, B, M)

D(N, N, N, N)

D(Y, N, N, N)

D(Y, N, M, M)

D(Y, M, X, X)

D(N, M, X, X)

'phantom most similar to TG43'

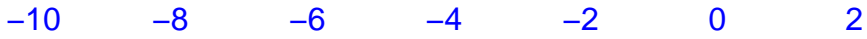

%diff 100\*(GBBS-TG43)/TG43

GBBS(solid model applicator, body, balloon & rectal contrast, packing contrast)

# Patient\_24 A right

'phantom least similar to TG43'

D(Y, N, B, B)

D(Y, N, B, N)

D(Y, N, B, M)

D(N, N, N, N)

D(Y, N, N, N)

D(Y, N, M, M)

D(Y, M, X, X)

D(N, M, X, X)

'phantom most similar to TG43'



%diff 100\*(GBBS-TG43)/TG43

GBBS(solid model applicator, body, balloon & rectal contrast, packing contrast)

# Patient\_25 A right

'phantom least similar to TG43'

- D(Y, N, B, B)
- D(Y, N, B, N)
- D(Y, N, B, M)
- D(N, N, N, N)
- D(Y, N, N, N)
- D(Y, N, M, M)
- D(Y, M, X, X)
- D(N, M, X, X)

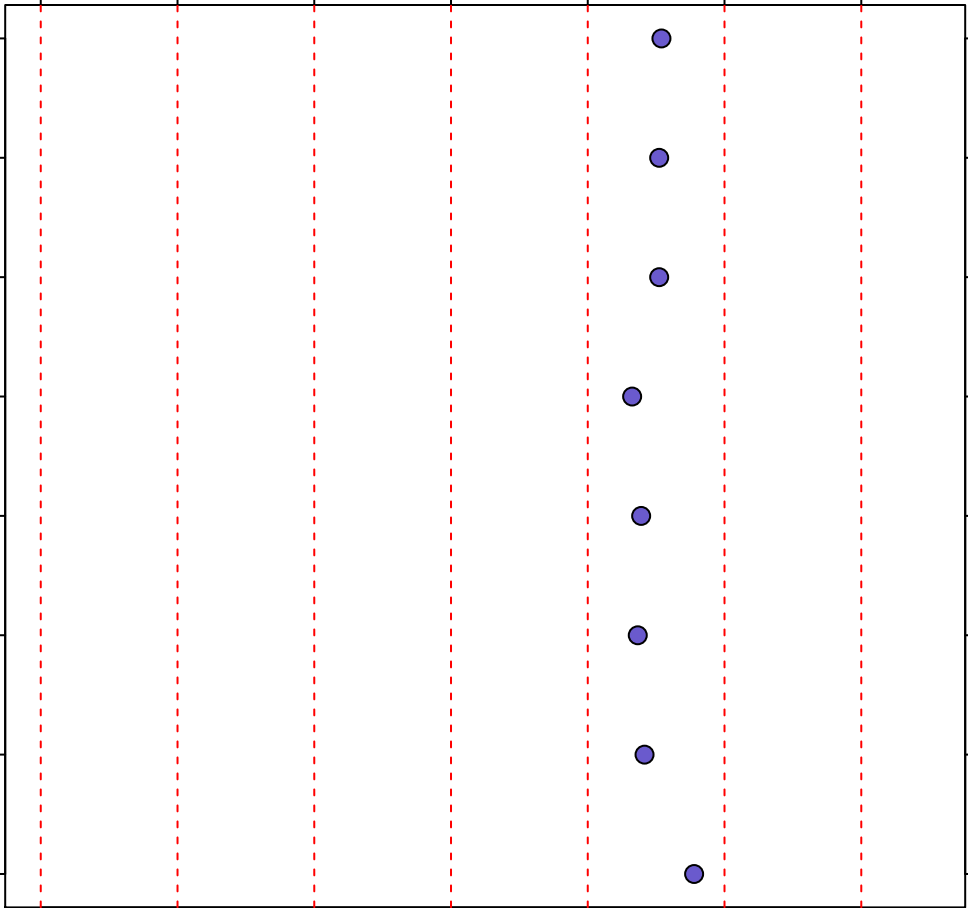

'phantom most similar to TG43'

%diff 100\*(GBBS-TG43)/TG43

GBBS(solid model applicator, body, balloon & rectal contrast, packing contrast)

# Patient\_26 A right

'phantom least similar to TG43'

D(Y, N, B, B)

D(Y, N, B, N)

D(Y, N, B, M)

D(N, N, N, N)

D(Y, N, N, N)

D(Y, N, M, M)

D(Y, M, X, X)

D(N, M, X, X)

'phantom most similar to TG43'

-10

-8

-6

-4

-2

0

2

%diff 100\*(GBBS-TG43)/TG43

GBBS(solid model applicator, body, balloon & rectal contrast, packing contrast)

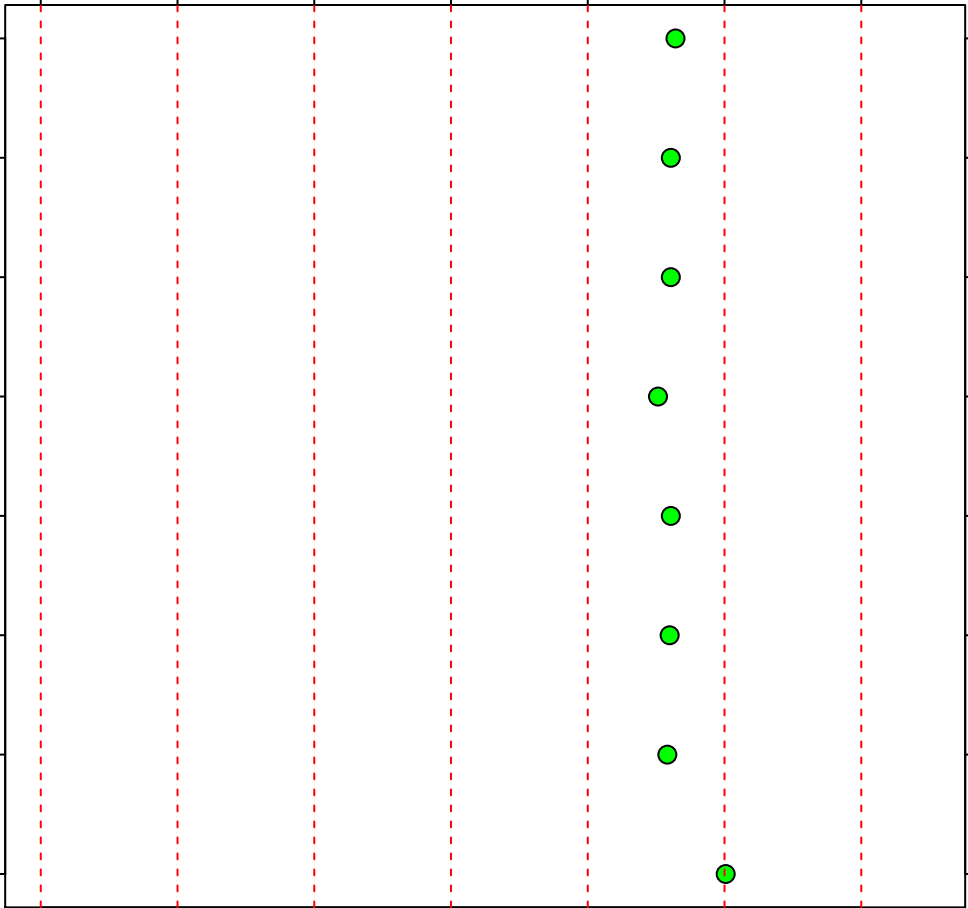

# Patient\_01 B left

'phantom least similar to TG43'

D(Y, N, B, B)

D(Y, N, B, N)

D(Y, N, B, M)

D(N, N, N, N)

D(Y, N, N, N)

D(Y, N, M, M)

D(Y, M, X, X)

D(N, M, X, X)

'phantom most similar to TG43'

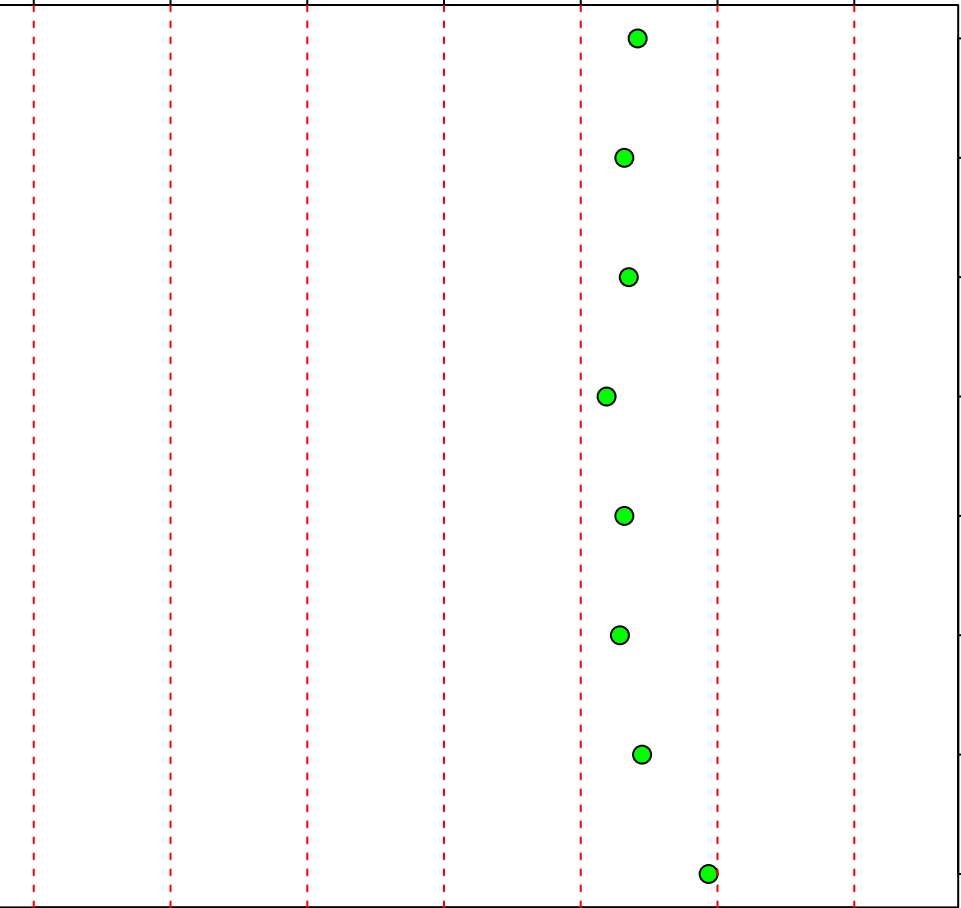

-10 -8 -6 -4 -2 0 2

%diff 100\*(GBBS-TG43)/TG43

GBBS(solid model applicator, body, balloon & rectal contrast, packing contrast)

# Patient\_02 B left

'phantom least similar to TG43'

D(Y, N, B, B)

D(Y, N, B, N)

D(Y, N, B, M)

D(N, N, N, N)

D(Y, N, N, N)

D(Y, N, M, M)

D(Y, M, X, X)

D(N, M, X, X)

'phantom most similar to TG43'

-10

-8

-6

-4

-2

0

2

%diff 100\*(GBBS-TG43)/TG43

GBBS(solid model applicator, body, balloon & rectal contrast, packing contrast)

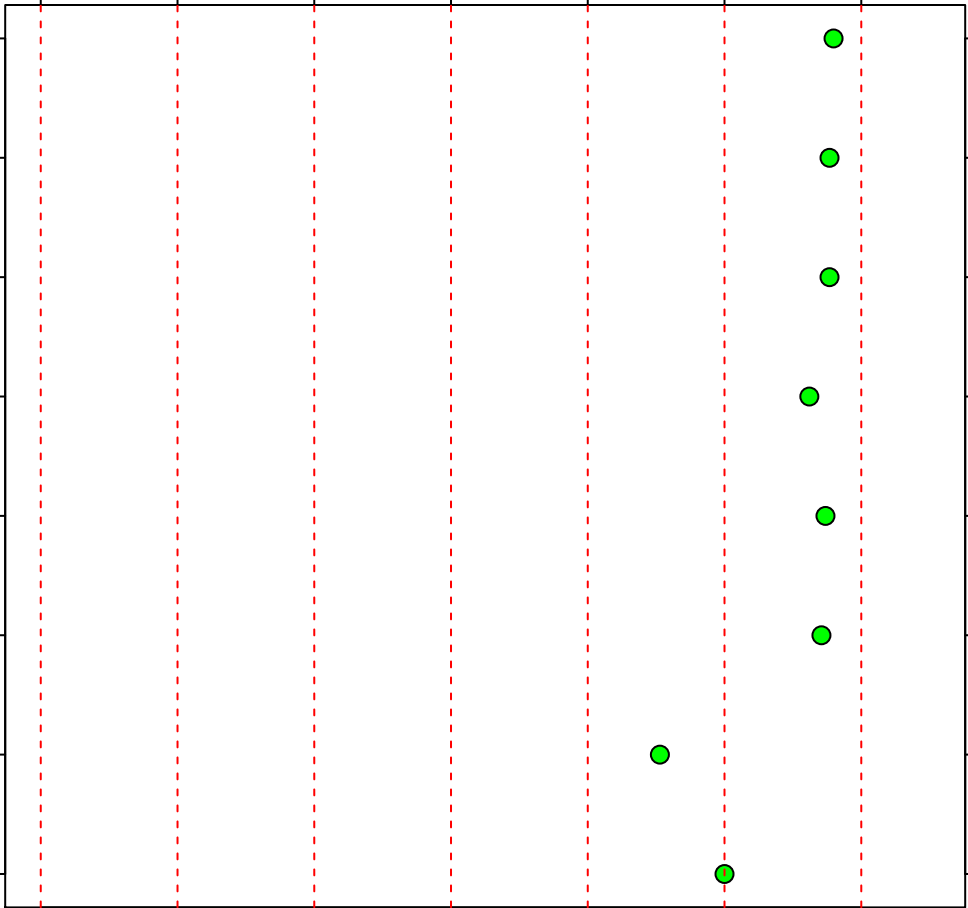

# Patient\_03 B left

'phantom least similar to TG43'

D(Y, N, B, B)

D(Y, N, B, N)

D(Y, N, B, M)

D(N, N, N, N)

D(Y, N, N, N)

D(Y, N, M, M)

D(Y, M, X, X)

D(N, M, X, X)

'phantom most similar to TG43'

-10

-8

-6

-4

-2

0

2

%diff 100\*(GBBS-TG43)/TG43

GBBS(solid model applicator, body, balloon & rectal contrast, packing contrast)

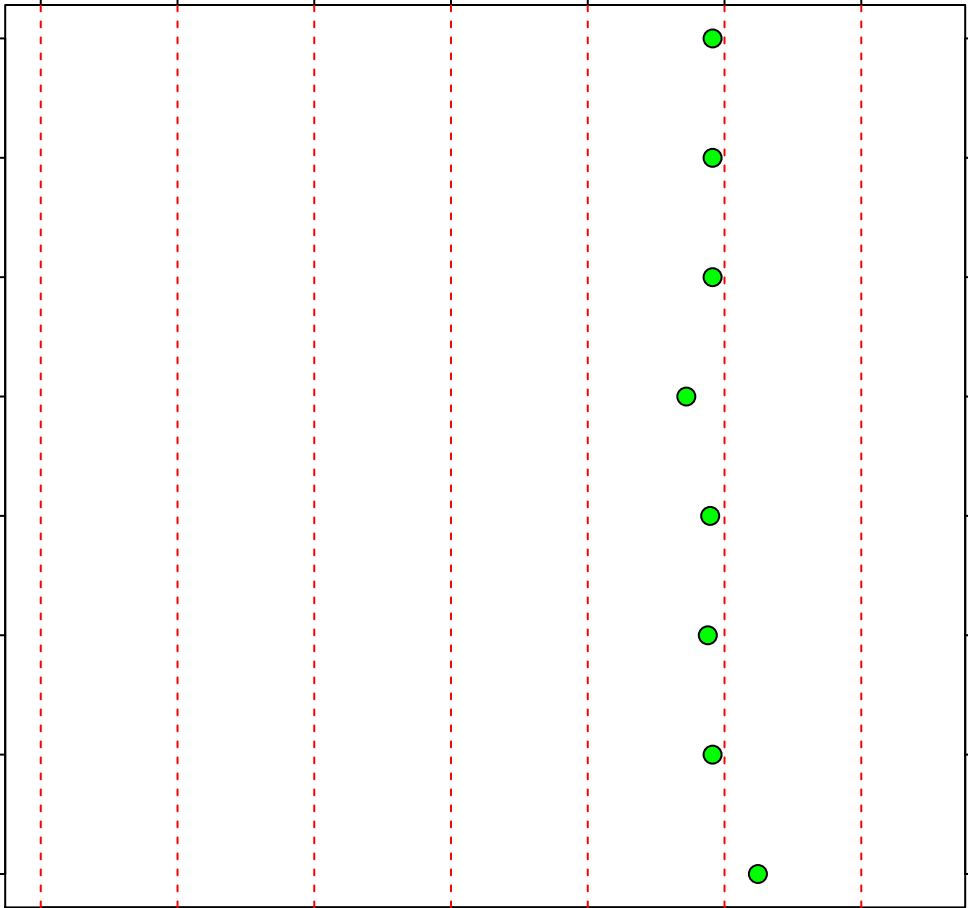



# Patient\_04 B left

'phantom least similar to TG43'

D(Y, N, B, B)

D(Y, N, B, N)

D(Y, N, B, M)

D(N, N, N, N)

D(Y, N, N, N)

D(Y, N, M, M)

D(Y, M, X, X)

D(N, M, X, X)

'phantom most similar to TG43'

-10 -8 -6 -4 -2 0 2

%diff 100\*(GBBS-TG43)/TG43

GBBS(solid model applicator, body, balloon & rectal contrast, packing contrast)

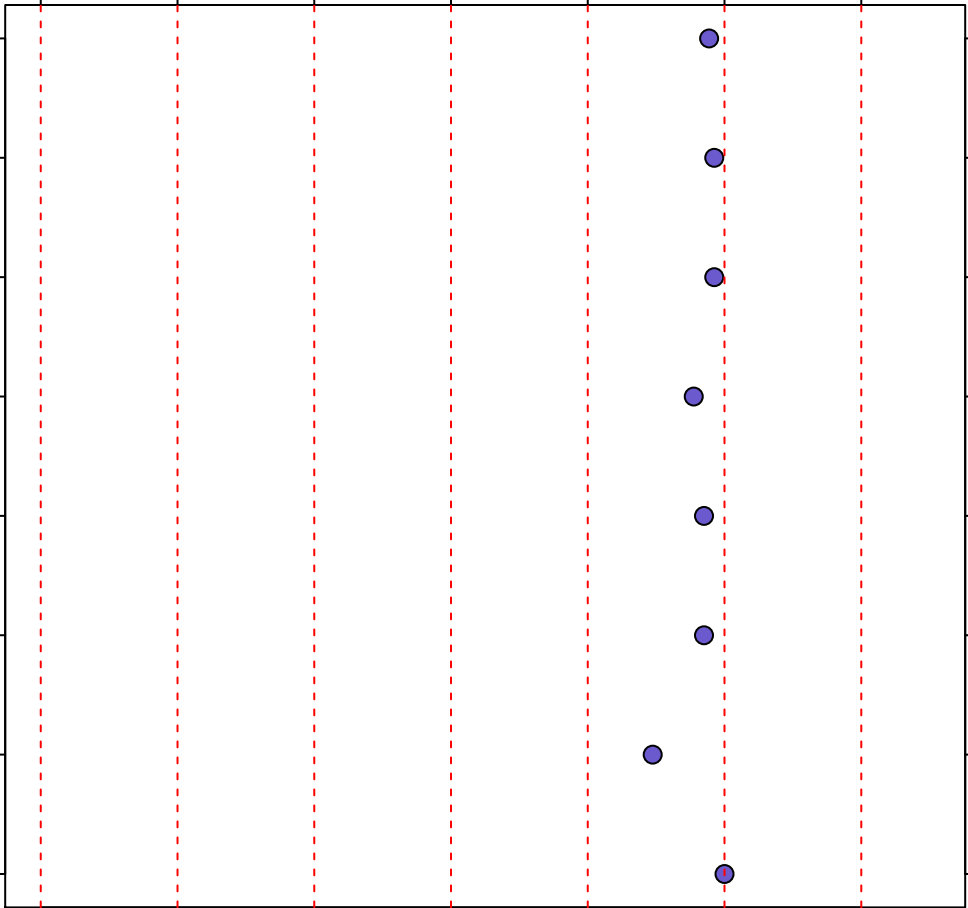

# Patient\_05 B left

'phantom least similar to TG43'

D(Y, N, B, B)

D(Y, N, B, N)

D(Y, N, B, M)

D(N, N, N, N)

D(Y, N, N, N)

D(Y, N, M, M)

D(Y, M, X, X)

D(N, M, X, X)

'phantom most similar to TG43'

-10

-8

-6

-4

-2

0

2

%diff 100\*(GBBS-TG43)/TG43

GBBS(solid model applicator, body, balloon & rectal contrast, packing contrast)

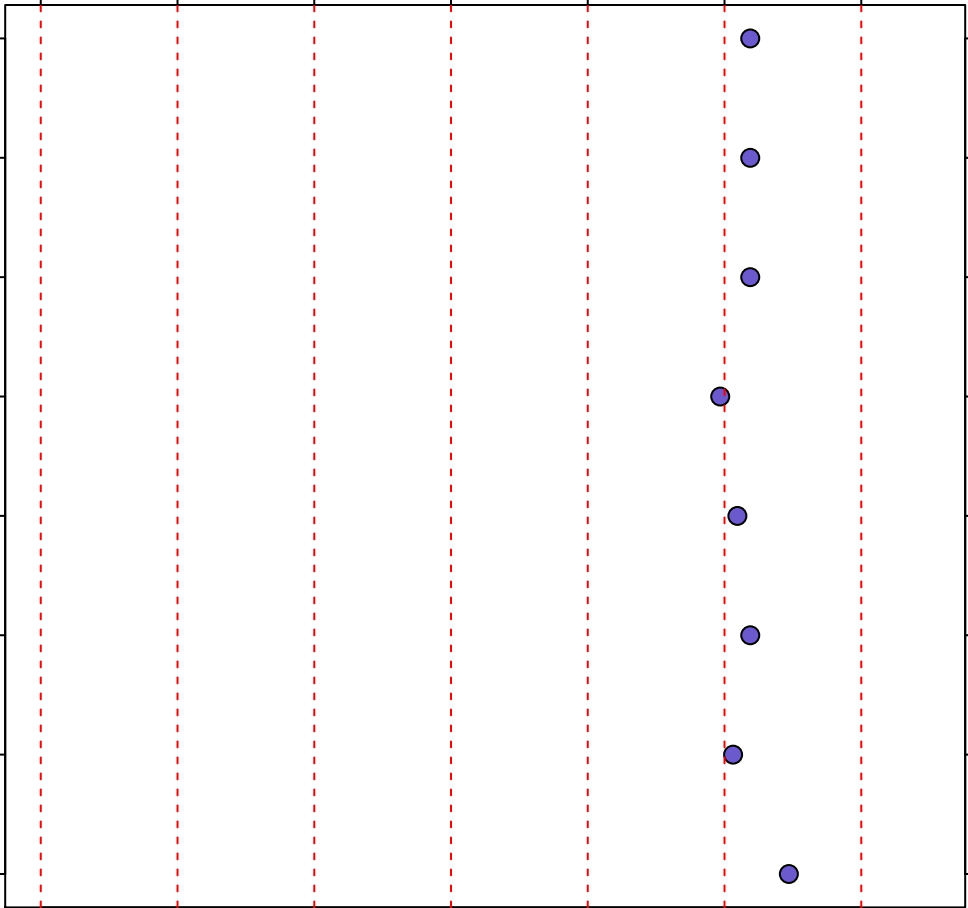

# Patient\_06 B left

'phantom least similar to TG43'

D(Y, N, B, B)

D(Y, N, B, N)

D(Y, N, B, M)

D(N, N, N, N)

D(Y, N, N, N)

D(Y, N, M, M)

D(Y, M, X, X)

D(N, M, X, X)

'phantom most similar to TG43'

-10 -8 -6 -4 -2 0 2

%diff 100\*(GBBS-TG43)/TG43

GBBS(solid model applicator, body, balloon & rectal contrast, packing contrast)

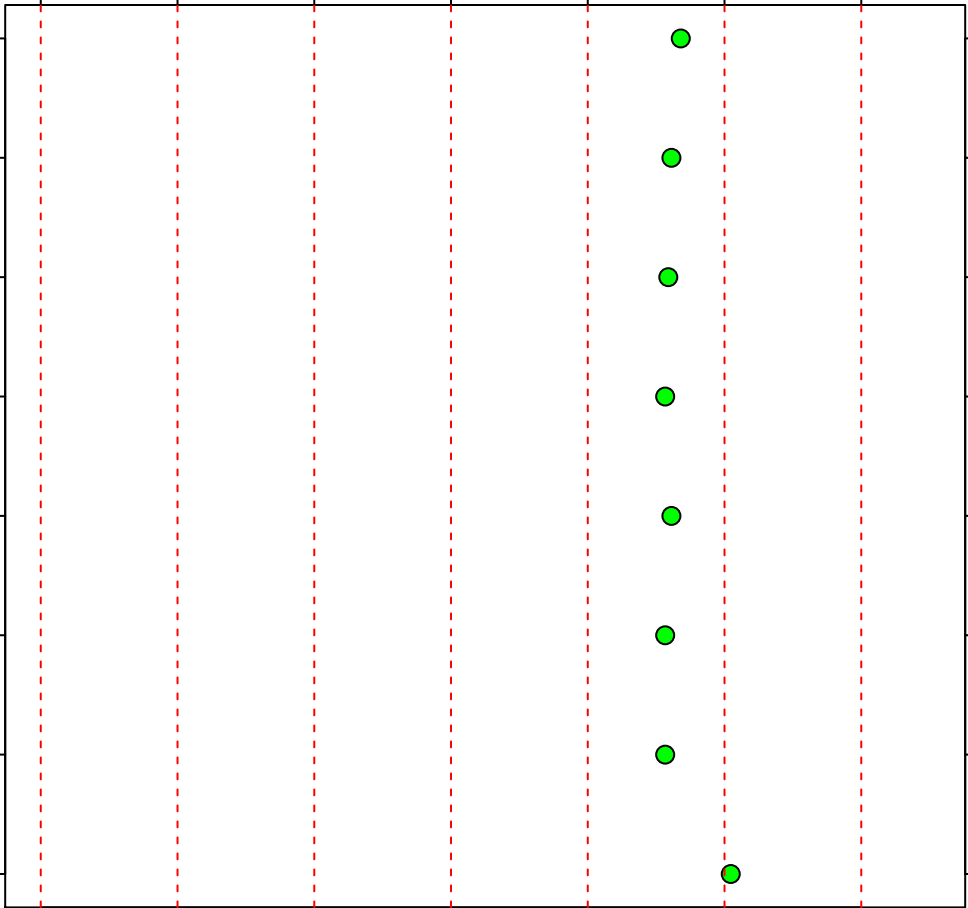

# Patient\_07 B left

'phantom least similar to TG43'

- D(Y, N, B, B)
- D(Y, N, B, N)
- D(Y, N, B, M)
- D(N, N, N, N)
- D(Y, N, N, N)
- D(Y, N, M, M)
- D(Y, M, X, X)
- D(N, M, X, X)

'phantom most similar to TG43'

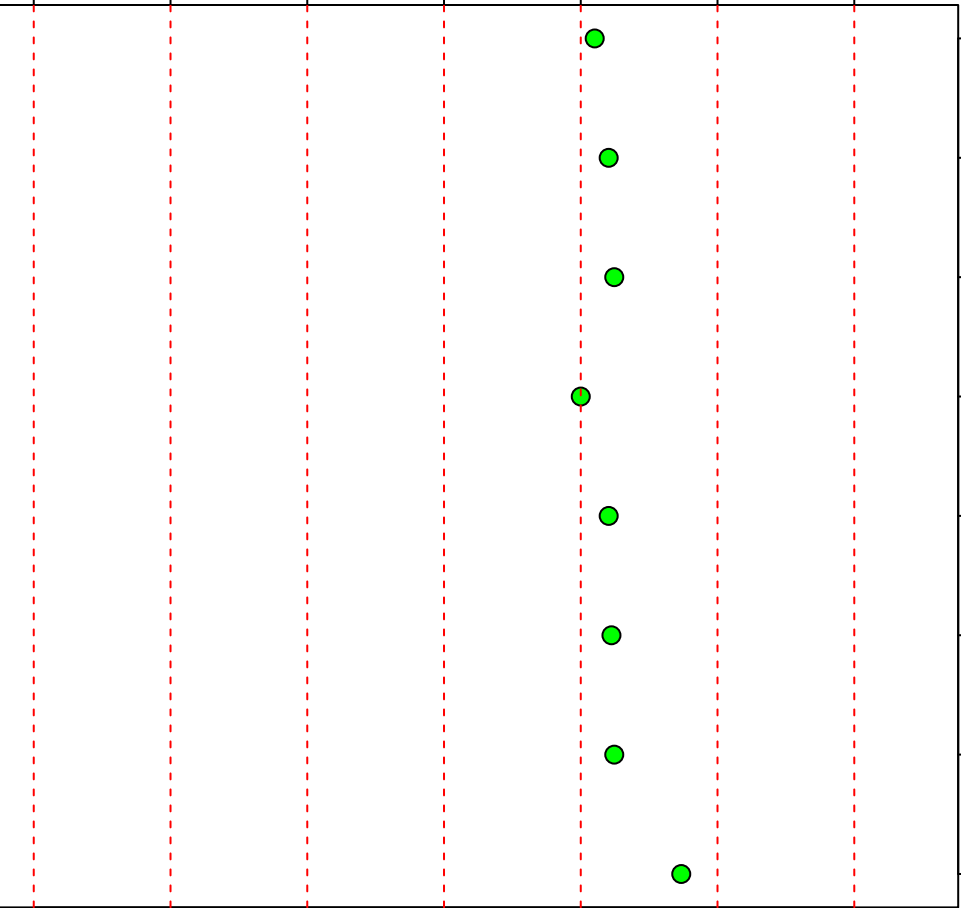

%diff 100\*(GBBS-TG43)/TG43

GBBS(solid model applicator, body, balloon & rectal contrast, packing contrast)

# Patient\_08 B left

'phantom least similar to TG43'

D(Y, N, B, B)

D(Y, N, B, N)

D(Y, N, B, M)

D(N, N, N, N)

D(Y, N, N, N)

D(Y, N, M, M)

D(Y, M, X, X)

D(N, M, X, X)

'phantom most similar to TG43'

-10

-8

-6

-4

-2

0

2

%diff 100\*(GBBS-TG43)/TG43

GBBS(solid model applicator, body, balloon & rectal contrast, packing contrast)

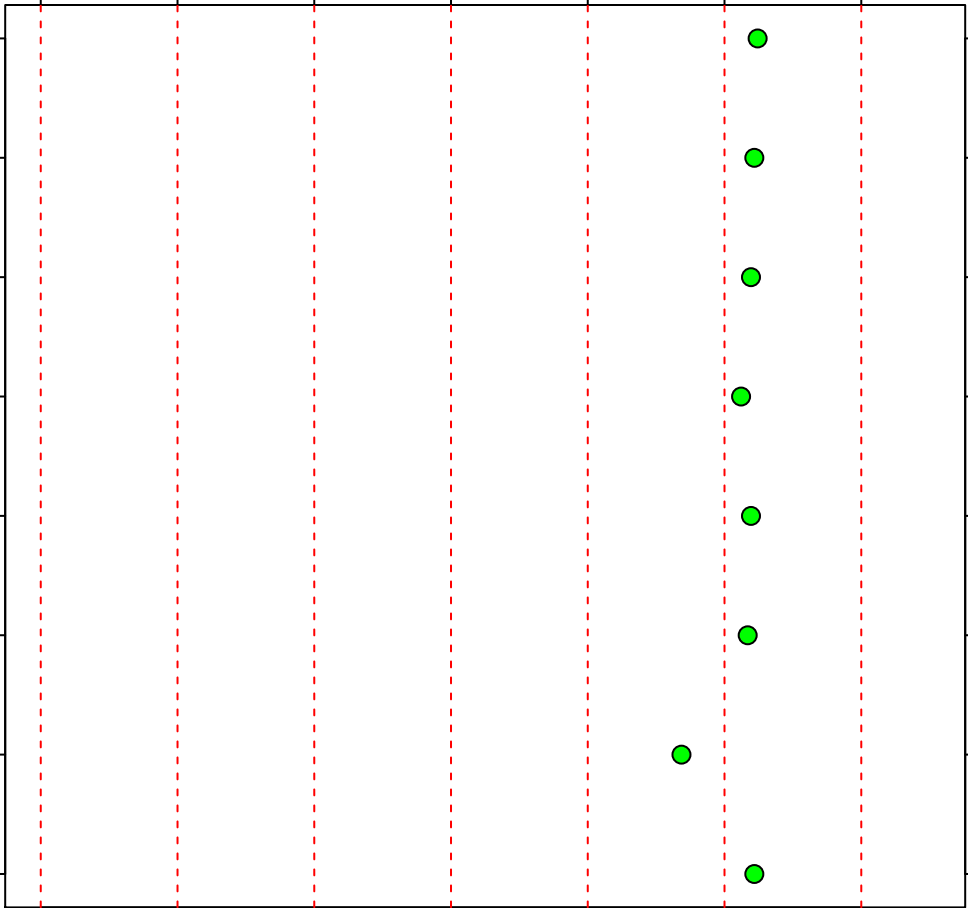

# Patient\_09 B left

'phantom least similar to TG43'

D(Y, N, B, B)

D(Y, N, B, N)

D(Y, N, B, M)

D(N, N, N, N)

D(Y, N, N, N)

D(Y, N, M, M)

D(Y, M, X, X)

D(N, M, X, X)

'phantom most similar to TG43'

-10

-8

-6

-4

-2

0

2

%diff 100\*(GBBS-TG43)/TG43

GBBS(solid model applicator, body, balloon & rectal contrast, packing contrast)

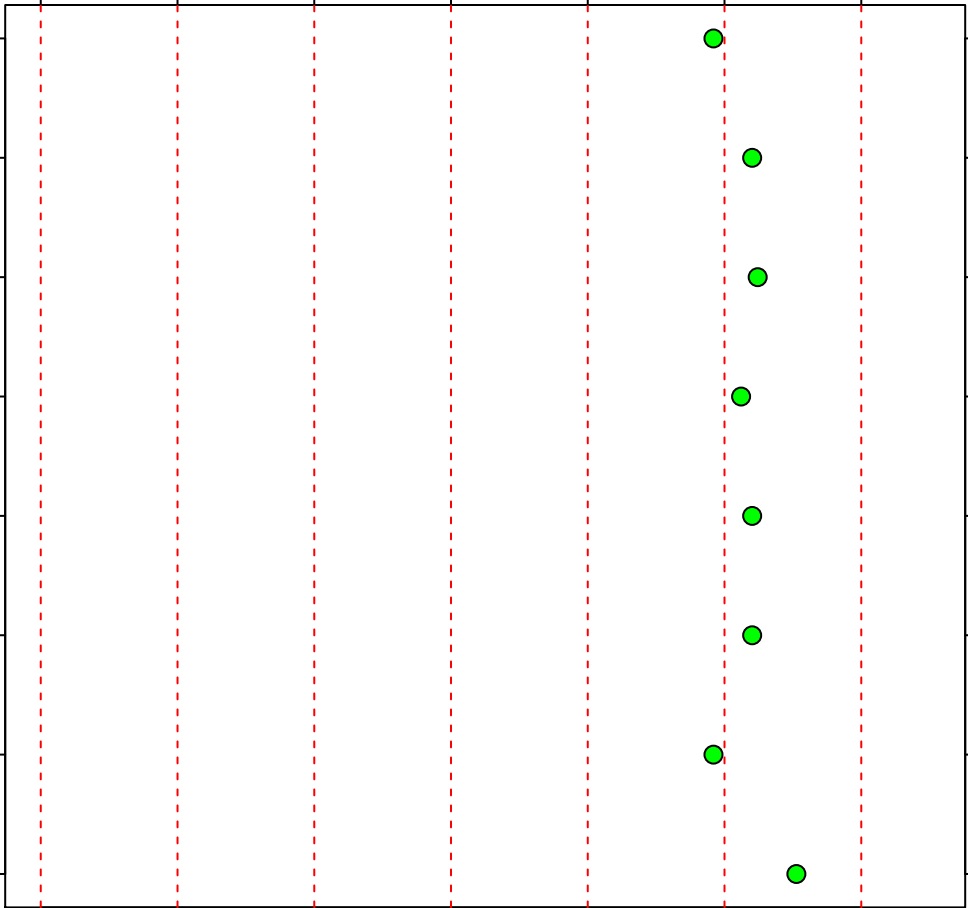

# Patient\_10 B left

'phantom least similar to TG43'

D(Y, N, B, B)

D(Y, N, B, N)

D(Y, N, B, M)

D(N, N, N, N)

D(Y, N, N, N)

D(Y, N, M, M)

D(Y, M, X, X)

D(N, M, X, X)

'phantom most similar to TG43'

-10

-8

-6

-4

-2

0

2

%diff 100\*(GBBS-TG43)/TG43

GBBS(solid model applicator, body, balloon & rectal contrast, packing contrast)

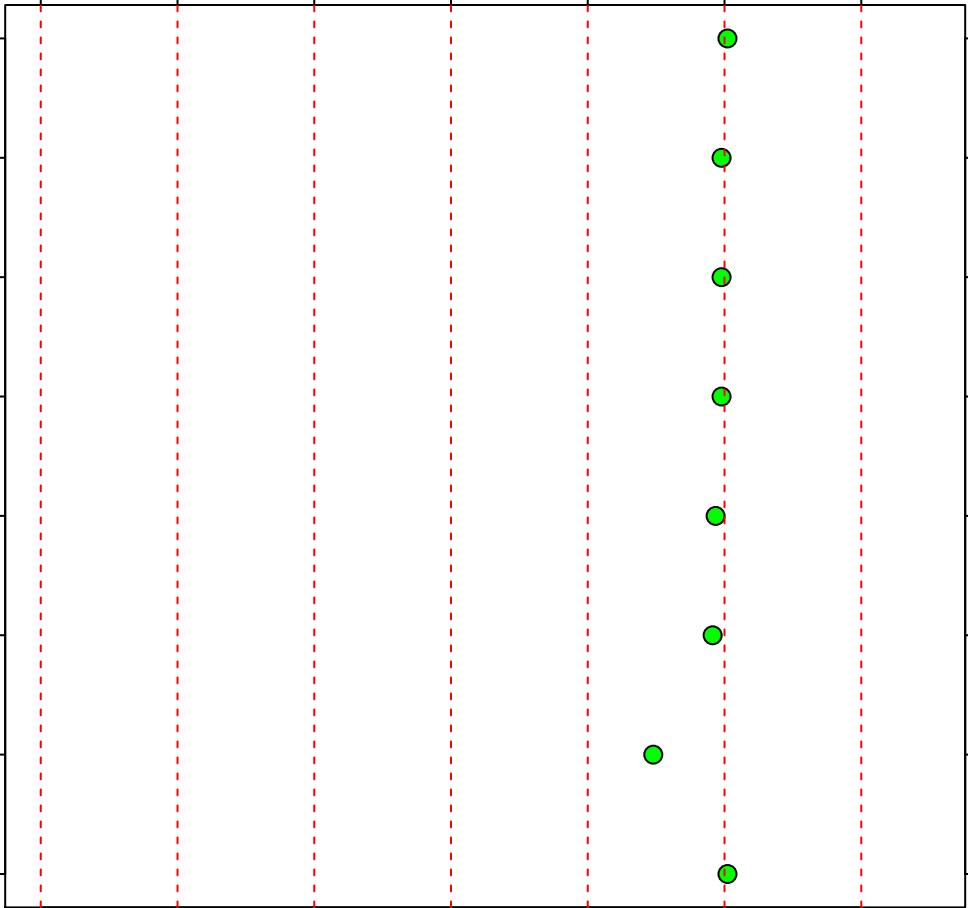

# Patient\_11 B left

'phantom least similar to TG43'

D(Y, N, B, B)

D(Y, N, B, N)

D(Y, N, B, M)

D(N, N, N, N)

D(Y, N, N, N)

D(Y, N, M, M)

D(Y, M, X, X)

D(N, M, X, X)

'phantom most similar to TG43'

-10

-8

-6

-4

-2

0

2

%diff 100\*(GBBS-TG43)/TG43

GBBS(solid model applicator, body, balloon & rectal contrast, packing contrast)

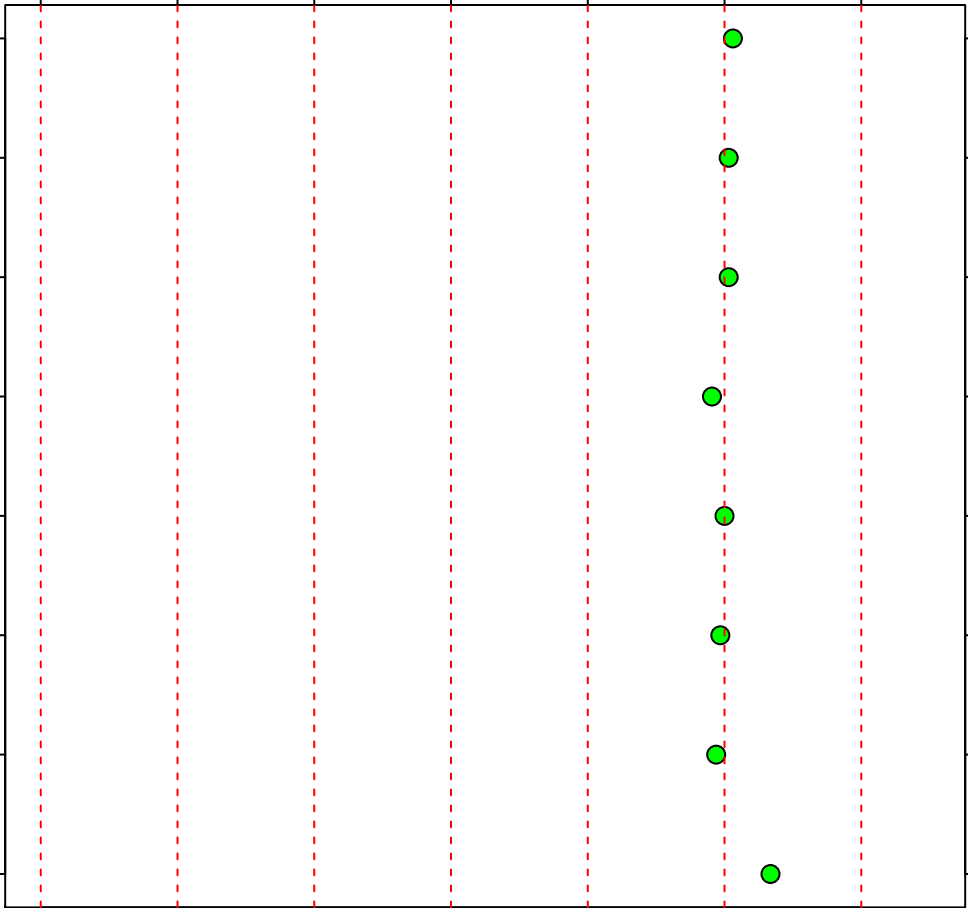



# Patient\_12 B left

'phantom least similar to TG43'

D(Y, N, B, B)

D(Y, N, B, N)

D(Y, N, B, M)

D(N, N, N, N)

D(Y, N, N, N)

D(Y, N, M, M)

D(Y, M, X, X)

D(N, M, X, X)

'phantom most similar to TG43'

-10 -8 -6 -4 -2 0 2

%diff 100\*(GBBS-TG43)/TG43

GBBS(solid model applicator, body, balloon & rectal contrast, packing contrast)

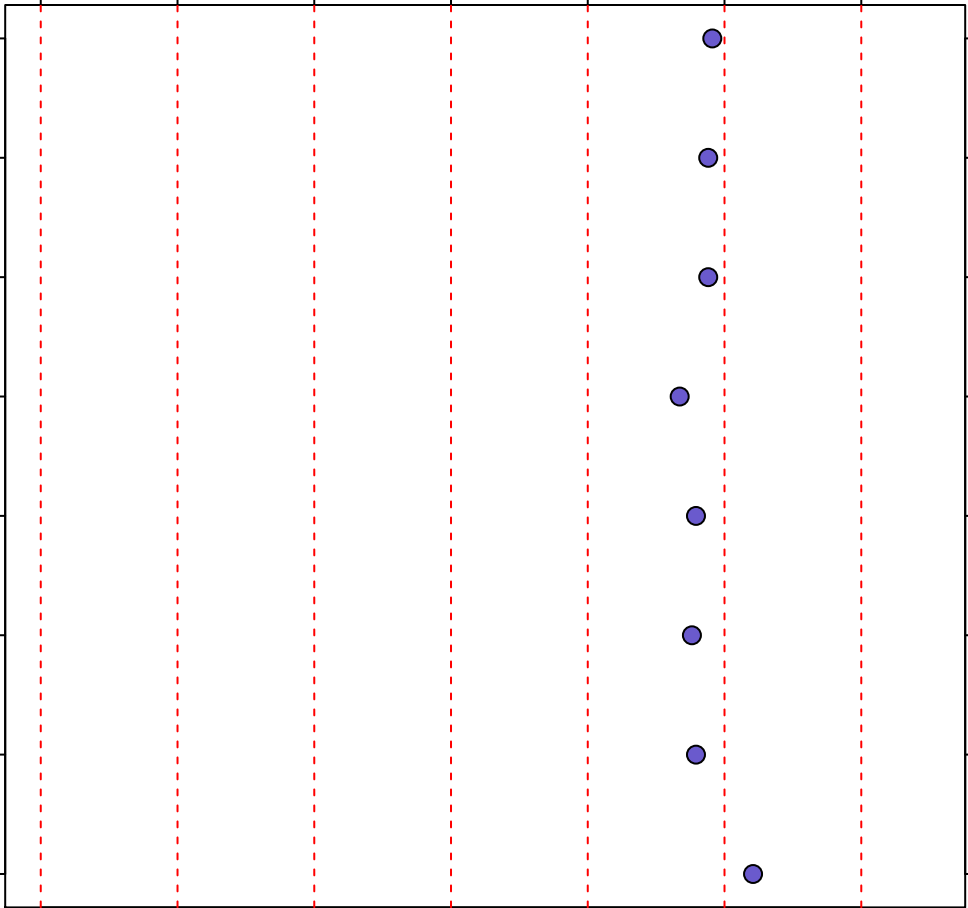

# Patient\_13 B left

'phantom least similar to TG43'

D(Y, N, B, B)

D(Y, N, B, N)

D(Y, N, B, M)

D(N, N, N, N)

D(Y, N, N, N)

D(Y, N, M, M)

D(Y, M, X, X)

D(N, M, X, X)

'phantom most similar to TG43'

-10

-8

-6

-4

-2

0

2

%diff 100\*(GBBS-TG43)/TG43

GBBS(solid model applicator, body, balloon & rectal contrast, packing contrast)

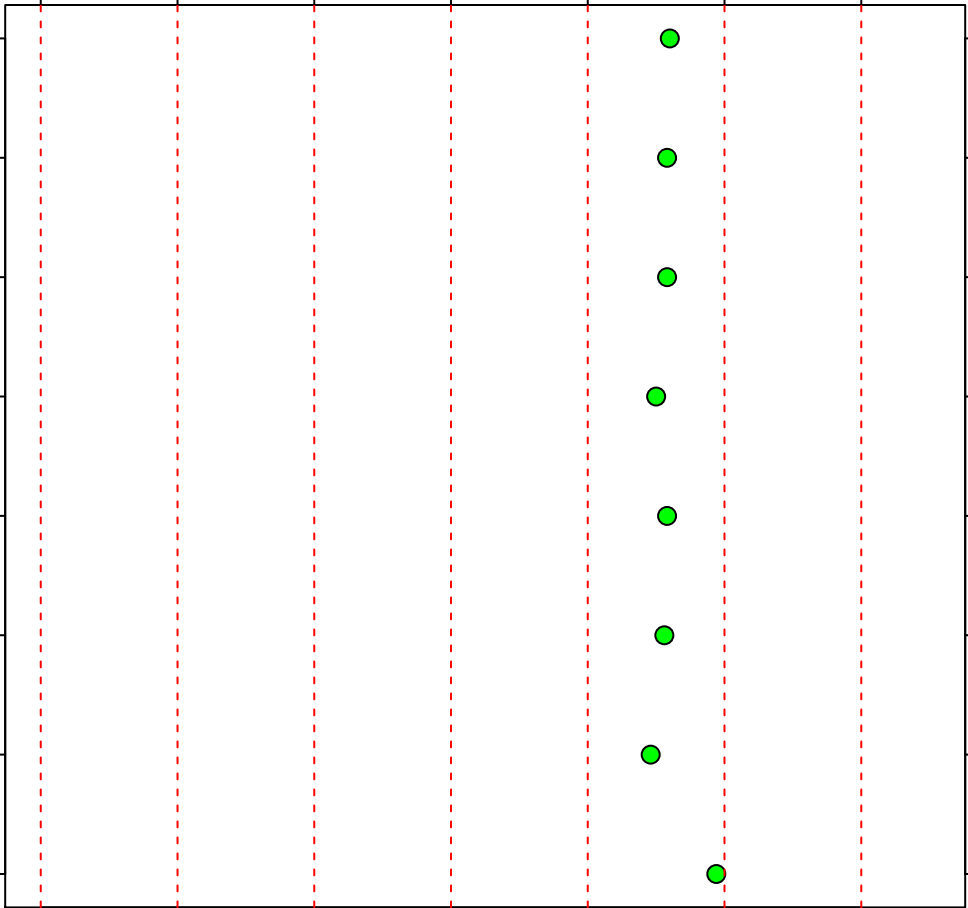

# Patient\_14 B left

'phantom least similar to TG43'

D(Y, N, B, B)

D(Y, N, B, N)

D(Y, N, B, M)

D(N, N, N, N)

D(Y, N, N, N)

D(Y, N, M, M)

D(Y, M, X, X)

D(N, M, X, X)

'phantom most similar to TG43'

-10

-8

-6

-4

-2

0

2

%diff 100\*(GBBS-TG43)/TG43

GBBS(solid model applicator, body, balloon & rectal contrast, packing contrast)

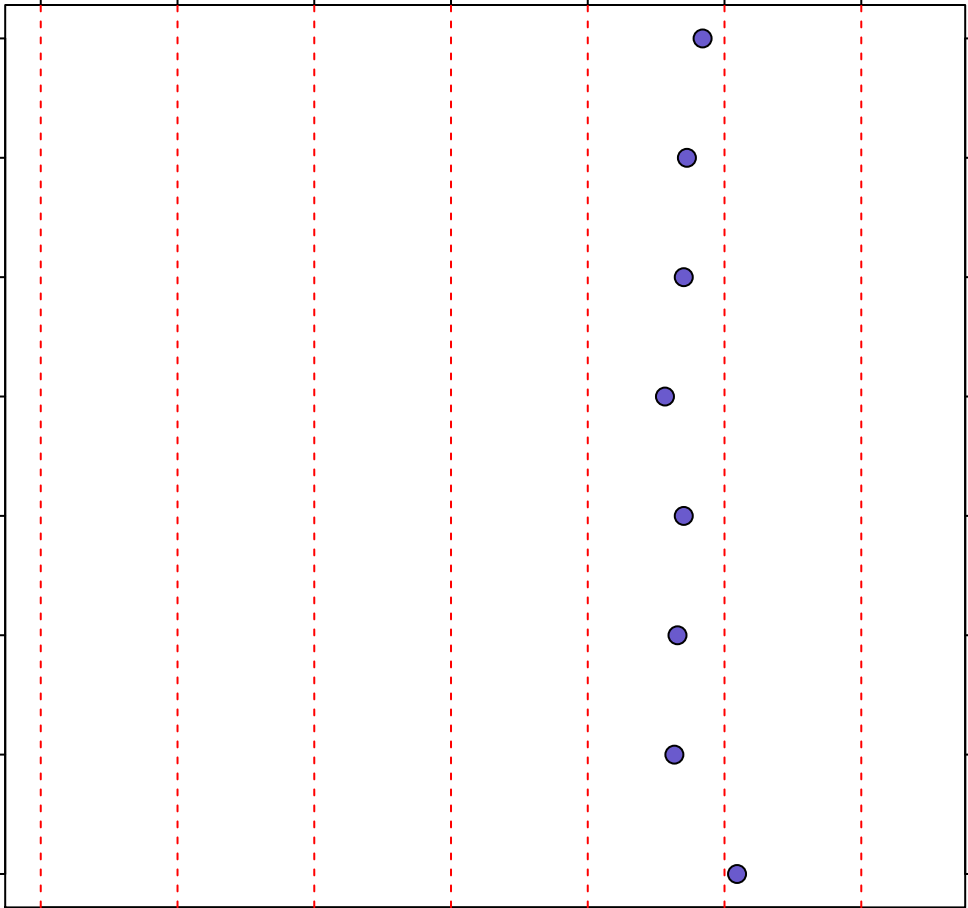

# Patient\_15 B left

'phantom least similar to TG43'

D(Y, N, B, B)

D(Y, N, B, N)

D(Y, N, B, M)

D(N, N, N, N)

D(Y, N, N, N)

D(Y, N, M, M)

D(Y, M, X, X)

D(N, M, X, X)

'phantom most similar to TG43'

-10

-8

-6

-4

-2

0

2

%diff 100\*(GBBS-TG43)/TG43

GBBS(solid model applicator, body, balloon & rectal contrast, packing contrast)

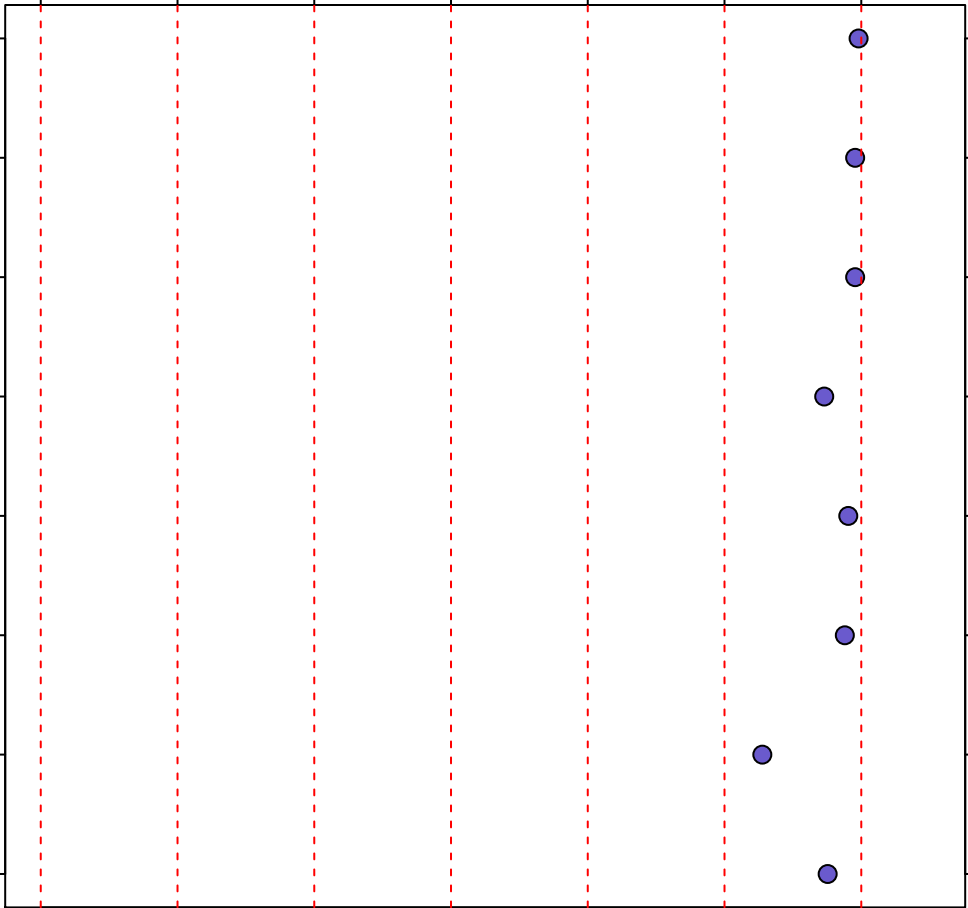

# Patient\_16 B left

'phantom least similar to TG43'

D(Y, N, B, B)

D(Y, N, B, N)

D(Y, N, B, M)

D(N, N, N, N)

D(Y, N, N, N)

D(Y, N, M, M)

D(Y, M, X, X)

D(N, M, X, X)

'phantom most similar to TG43'

-10

-8

-6

-4

-2

0

2

%diff 100\*(GBBS-TG43)/TG43

GBBS(solid model applicator, body, balloon & rectal contrast, packing contrast)

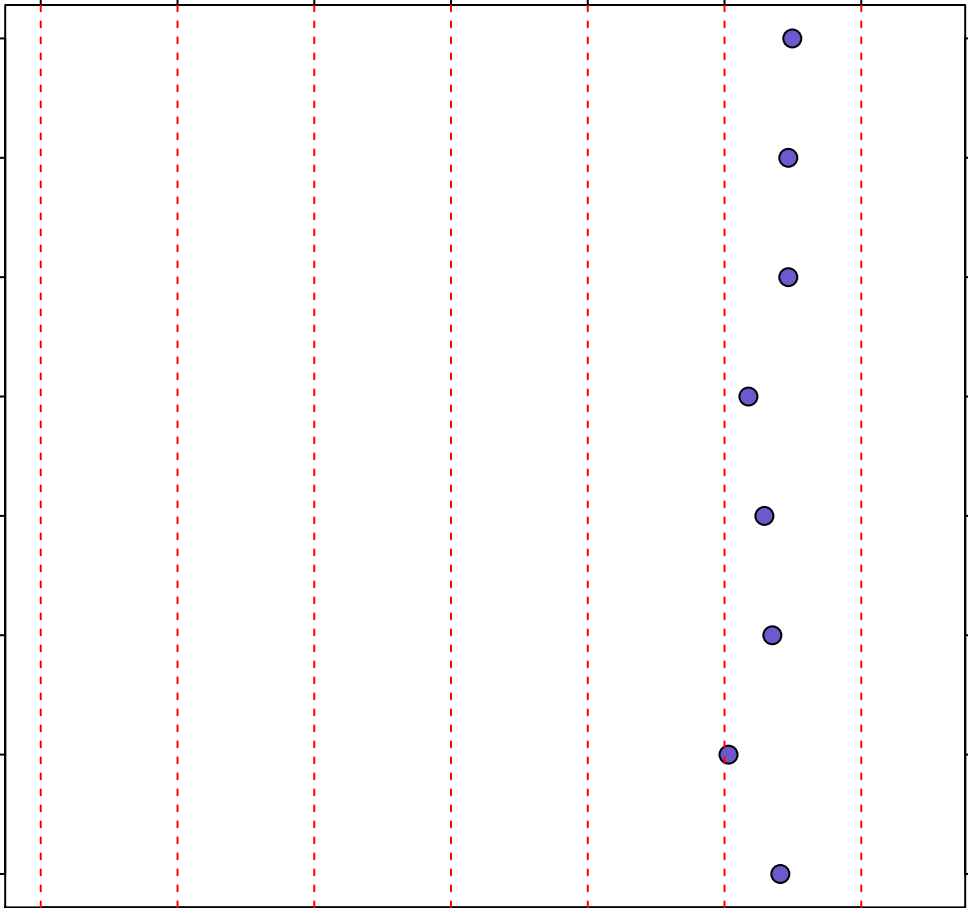

# Patient\_17 B left

'phantom least similar to TG43'

D(Y, N, B, B)

D(Y, N, B, N)

D(Y, N, B, M)

D(N, N, N, N)

D(Y, N, N, N)

D(Y, N, M, M)

D(Y, M, X, X)

D(N, M, X, X)

'phantom most similar to TG43'

-10

-8

-6

-4

-2

0

2

%diff 100\*(GBBS-TG43)/TG43

GBBS(solid model applicator, body, balloon & rectal contrast, packing contrast)

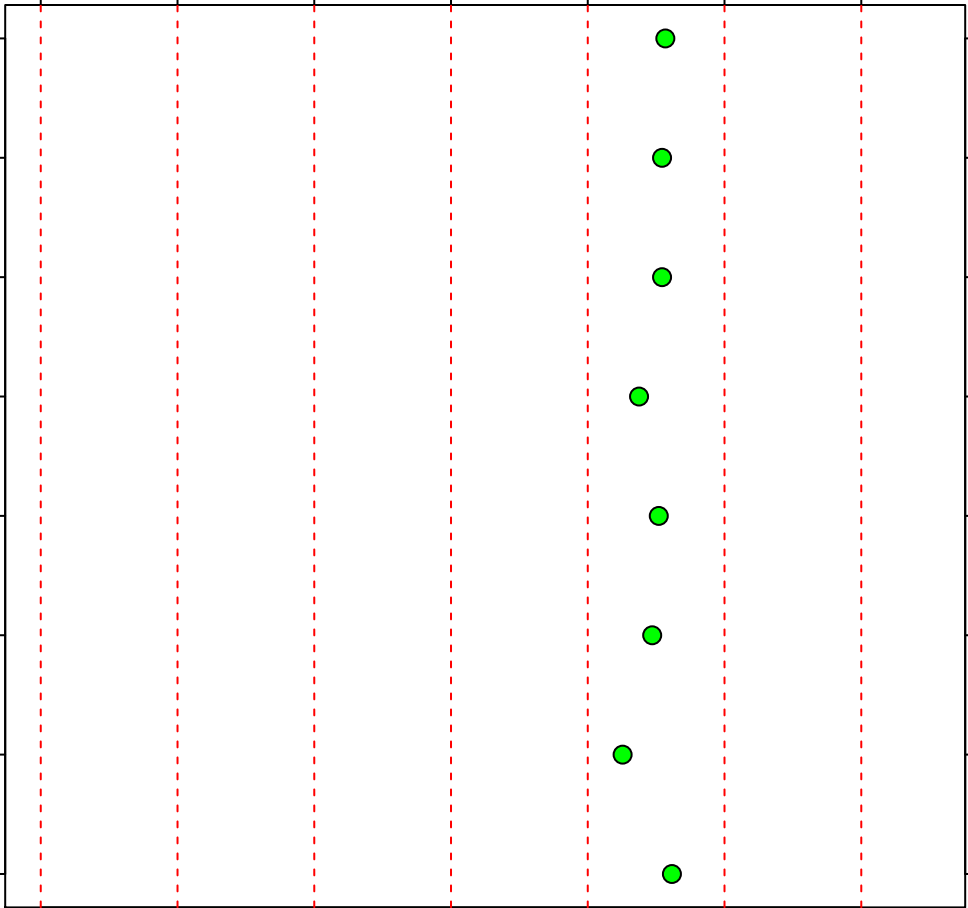

# Patient\_18 B left

'phantom least similar to TG43'

D(Y, N, B, B)

D(Y, N, B, N)

D(Y, N, B, M)

D(N, N, N, N)

D(Y, N, N, N)

D(Y, N, M, M)

D(Y, M, X, X)

D(N, M, X, X)

'phantom most similar to TG43'

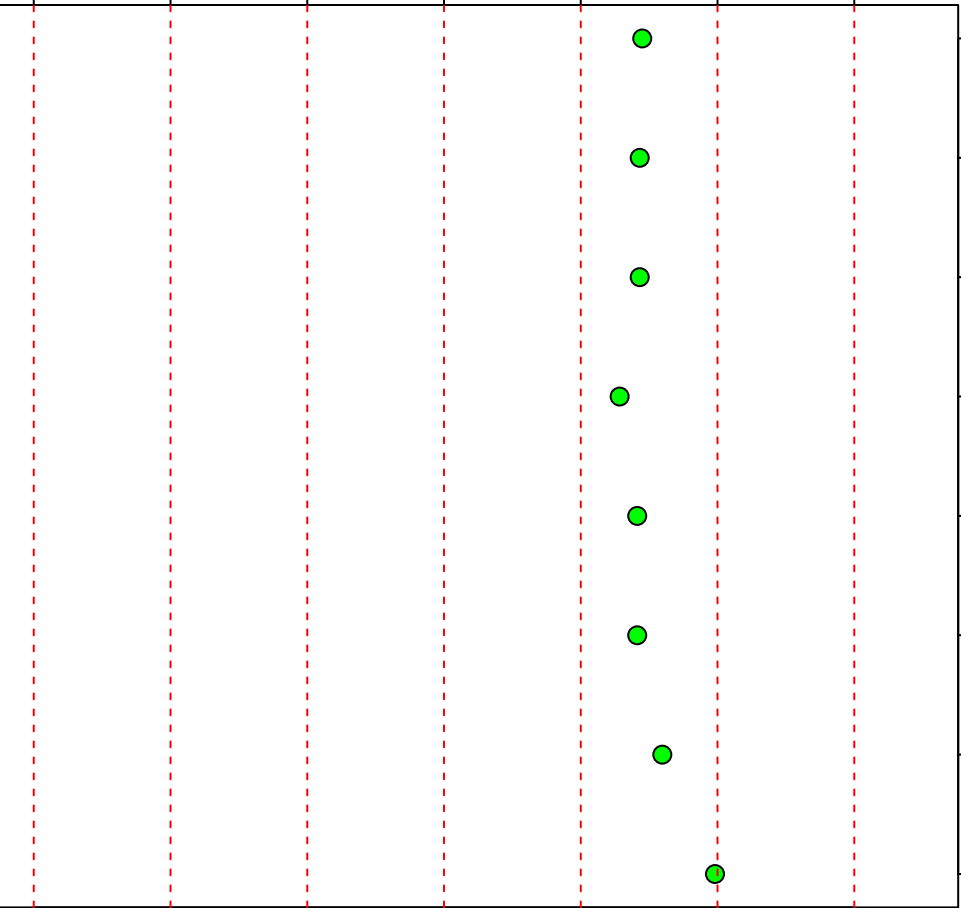

-10 -8 -6 -4 -2 0 2

%diff 100\*(GBBS-TG43)/TG43

GBBS(solid model applicator, body, balloon & rectal contrast, packing contrast)

# Patient\_19 B left

'phantom least similar to TG43'

D(Y, N, B, B)

D(Y, N, B, N)

D(Y, N, B, M)

D(N, N, N, N)

D(Y, N, N, N)

D(Y, N, M, M)

D(Y, M, X, X)

D(N, M, X, X)

'phantom most similar to TG43'

-10

-8

-6

-4

-2

0

2

%diff 100\*(GBBS-TG43)/TG43

GBBS(solid model applicator, body, balloon & rectal contrast, packing contrast)

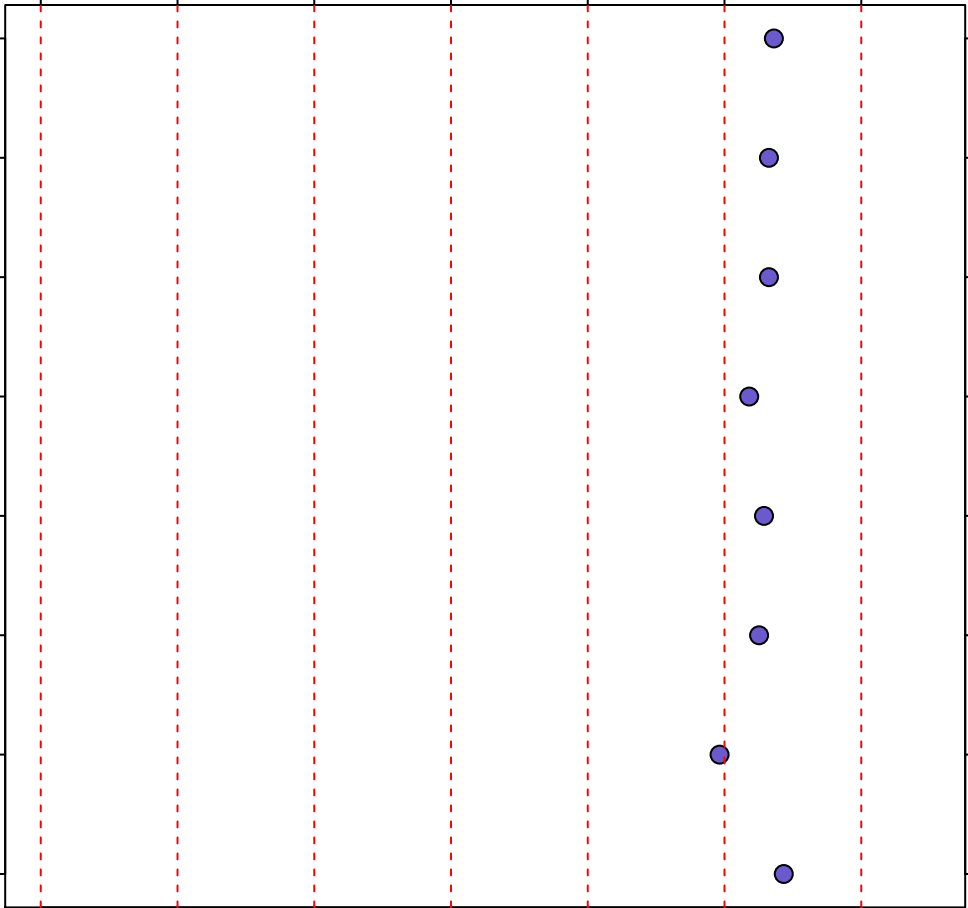



# Patient\_20 B left

'phantom least similar to TG43'

D(Y, N, B, B)

D(Y, N, B, N)

D(Y, N, B, M)

D(N, N, N, N)

D(Y, N, N, N)

D(Y, N, M, M)

D(Y, M, X, X)

D(N, M, X, X)

'phantom most similar to TG43'

-10

-8

-6

-4

-2

0

2

%diff 100\*(GBBS-TG43)/TG43

GBBS(solid model applicator, body, balloon & rectal contrast, packing contrast)

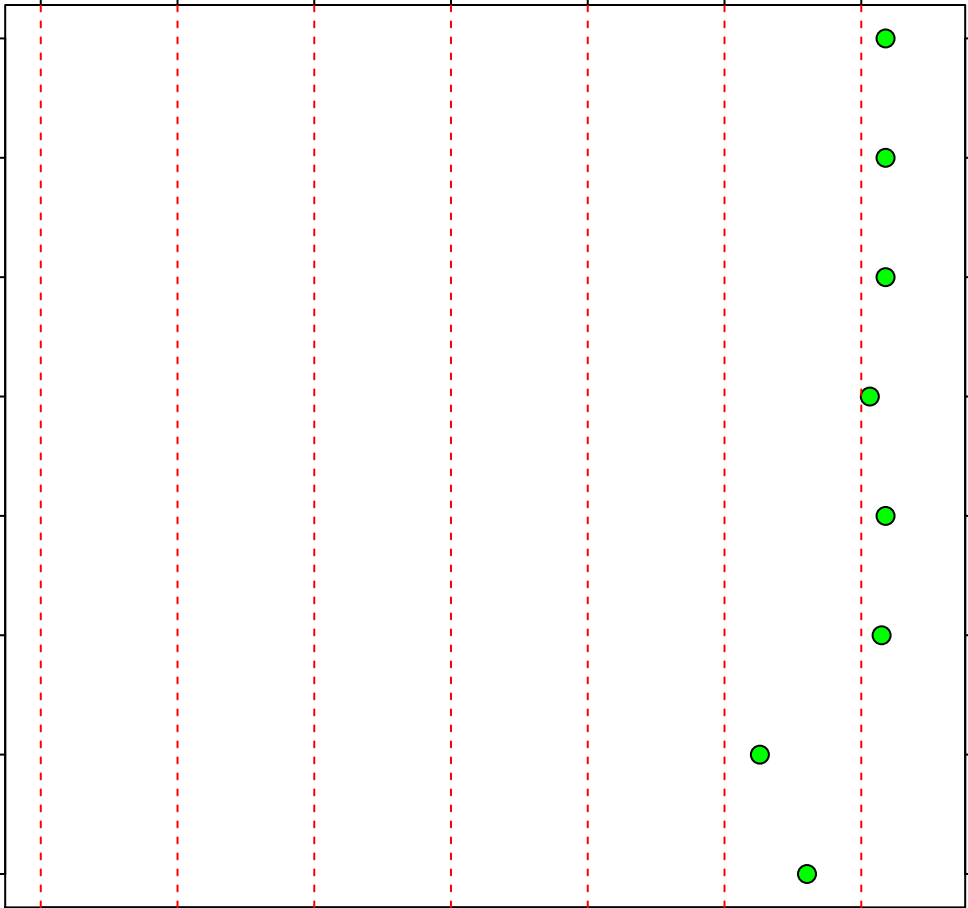

# Patient\_21 B left

'phantom least similar to TG43'

D(Y, N, B, B)

D(Y, N, B, N)

D(Y, N, B, M)

D(N, N, N, N)

D(Y, N, N, N)

D(Y, N, M, M)

D(Y, M, X, X)

D(N, M, X, X)

'phantom most similar to TG43'

-10

-8

-6

-4

-2

0

2

%diff 100\*(GBBS-TG43)/TG43

GBBS(solid model applicator, body, balloon & rectal contrast, packing contrast)

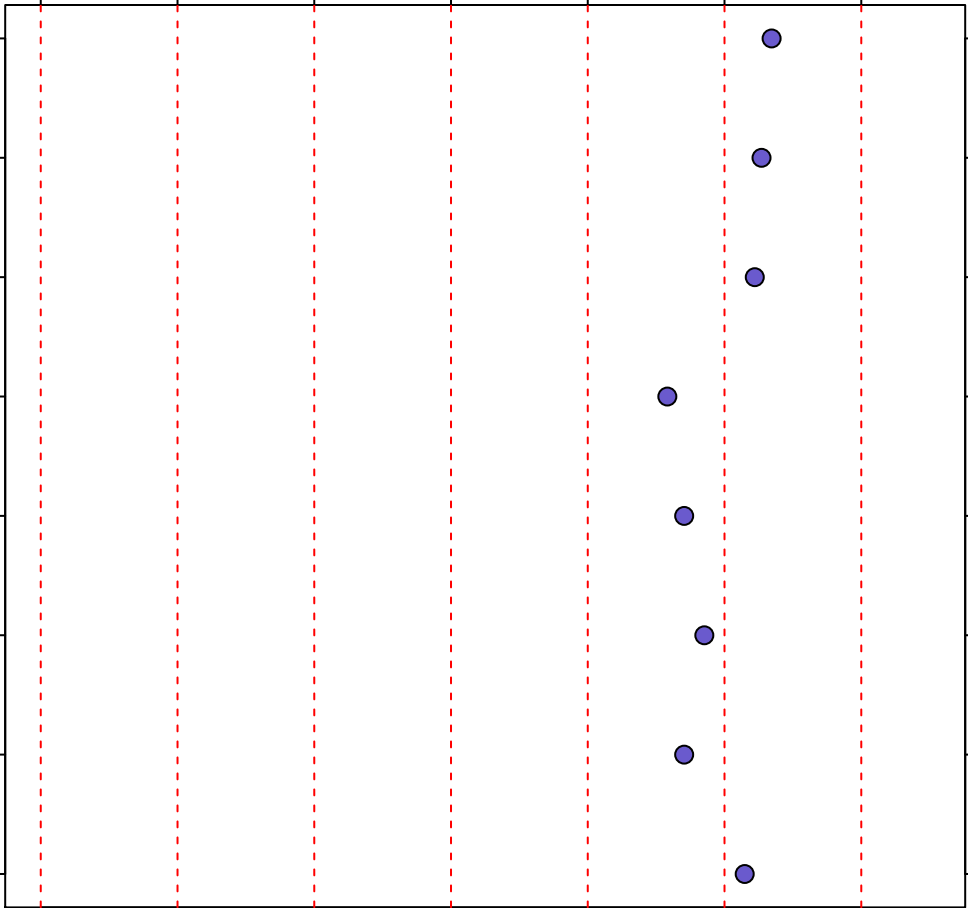

# Patient\_22 B left

'phantom least similar to TG43'

D(Y, N, B, B)

D(Y, N, B, N)

D(Y, N, B, M)

D(N, N, N, N)

D(Y, N, N, N)

D(Y, N, M, M)

D(Y, M, X, X)

D(N, M, X, X)

'phantom most similar to TG43'

-10

-8

-6

-4

-2

0

2

%diff 100\*(GBBS-TG43)/TG43

GBBS(solid model applicator, body, balloon & rectal contrast, packing contrast)

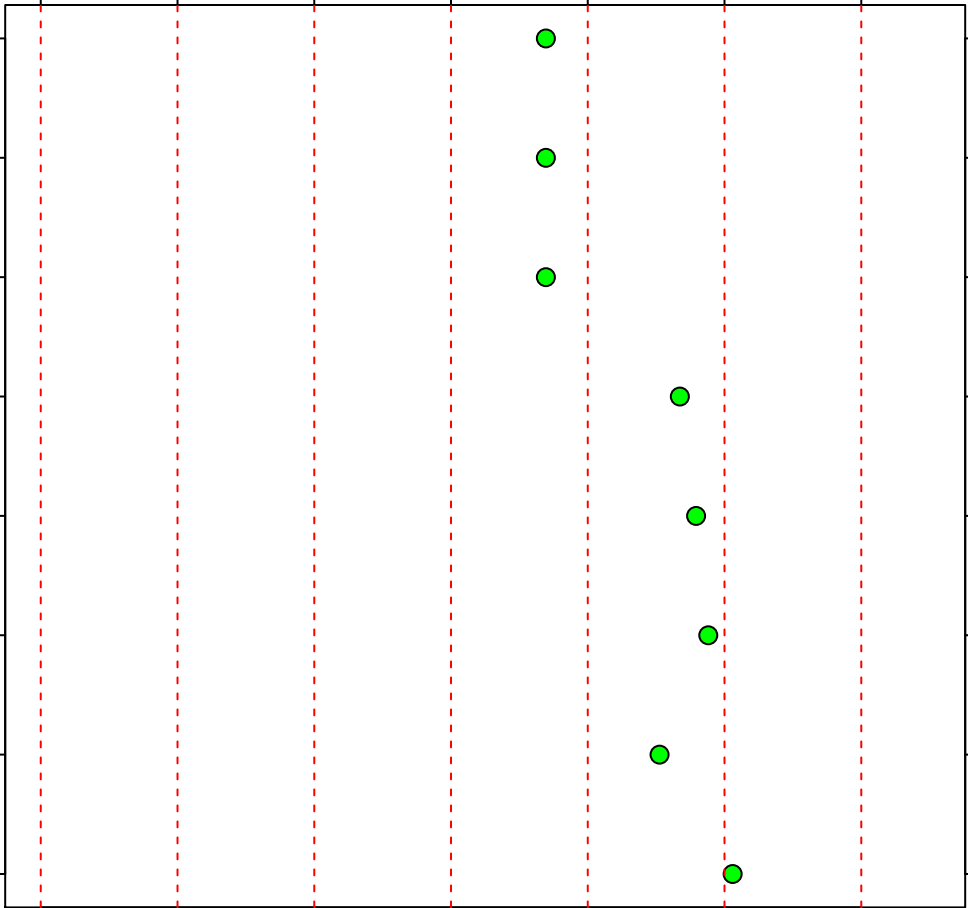

# Patient\_23 B left

'phantom least similar to TG43'

- D(Y, N, B, B)
- D(Y, N, B, N)
- D(Y, N, B, M)
- D(N, N, N, N)
- D(Y, N, N, N)
- D(Y, N, M, M)
- D(Y, M, X, X)
- D(N, M, X, X)

'phantom most similar to TG43'

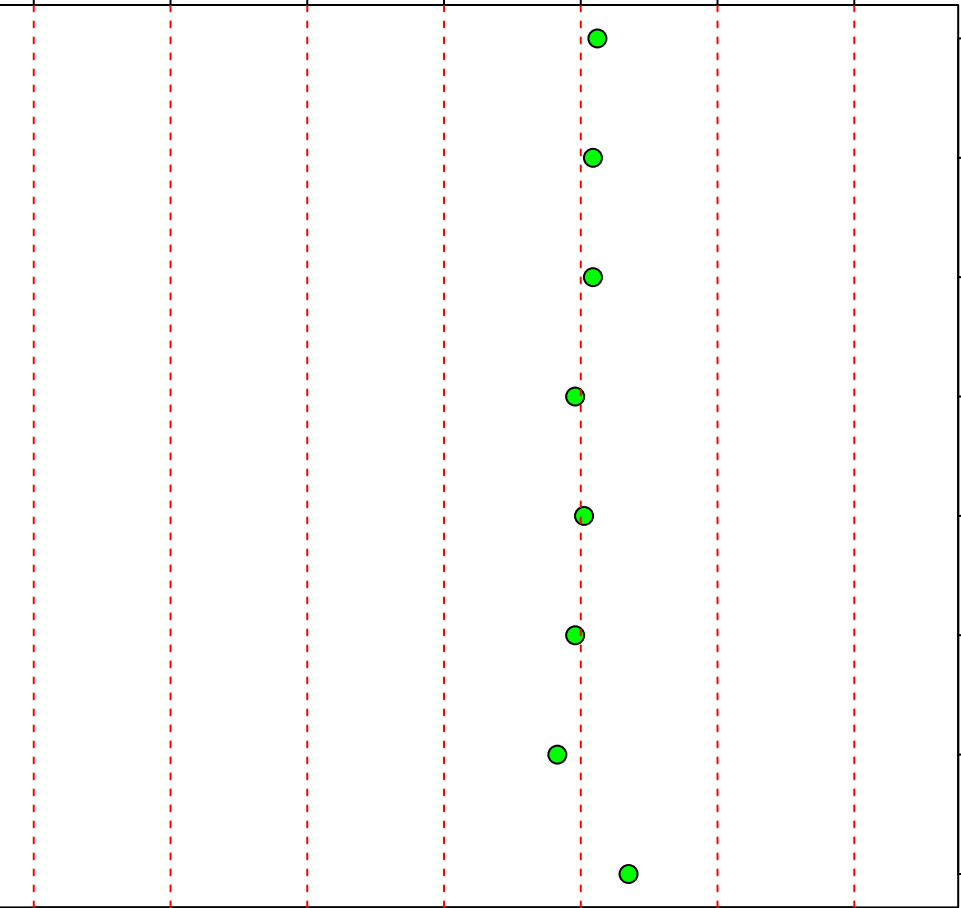

%diff 100\*(GBBS-TG43)/TG43

GBBS(solid model applicator, body, balloon & rectal contrast, packing contrast)

# Patient\_24 B left

'phantom least similar to TG43'

D(Y, N, B, B)

D(Y, N, B, N)

D(Y, N, B, M)

D(N, N, N, N)

D(Y, N, N, N)

D(Y, N, M, M)

D(Y, M, X, X)

D(N, M, X, X)

'phantom most similar to TG43'

-10

-8

-6

-4

-2

0

2

%diff 100\*(GBBS-TG43)/TG43

GBBS(solid model applicator, body, balloon & rectal contrast, packing contrast)

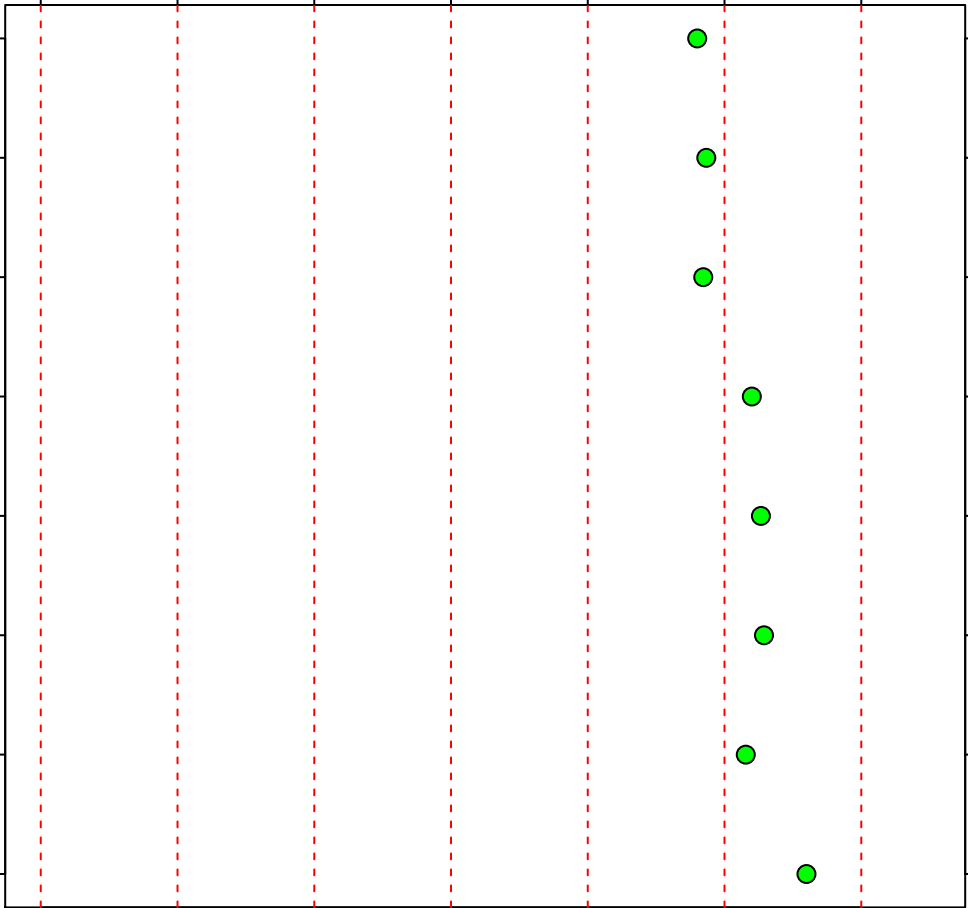

# Patient\_25 B left

'phantom least similar to TG43'

D(Y, N, B, B)

D(Y, N, B, N)

D(Y, N, B, M)

D(N, N, N, N)

D(Y, N, N, N)

D(Y, N, M, M)

D(Y, M, X, X)

D(N, M, X, X)

'phantom most similar to TG43'

-10 -8 -6 -4 -2 0 2

%diff 100\*(GBBS-TG43)/TG43

GBBS(solid model applicator, body, balloon & rectal contrast, packing contrast)

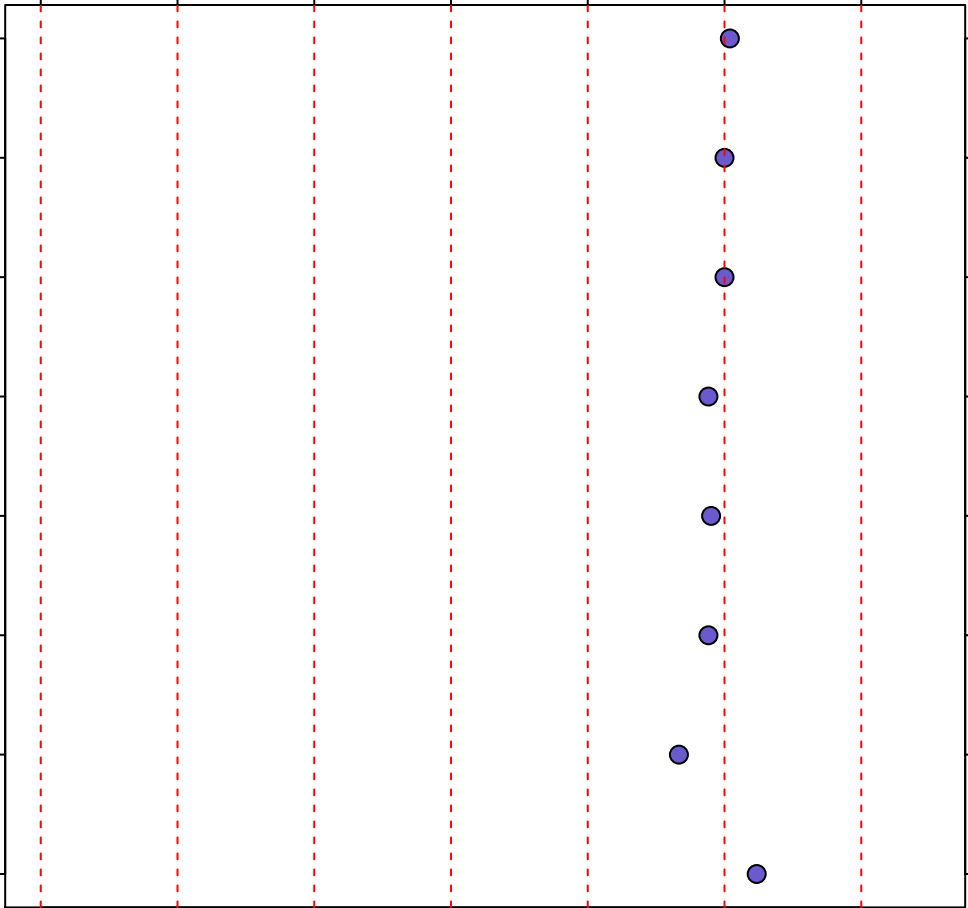

# Patient\_26 B left

'phantom least similar to TG43'

D(Y, N, B, B)

D(Y, N, B, N)

D(Y, N, B, M)

D(N, N, N, N)

D(Y, N, N, N)

D(Y, N, M, M)

D(Y, M, X, X)

D(N, M, X, X)

'phantom most similar to TG43'

-10

-8

-6

-4

-2

0

2

%diff 100\*(GBBS-TG43)/TG43

GBBS(solid model applicator, body, balloon & rectal contrast, packing contrast)

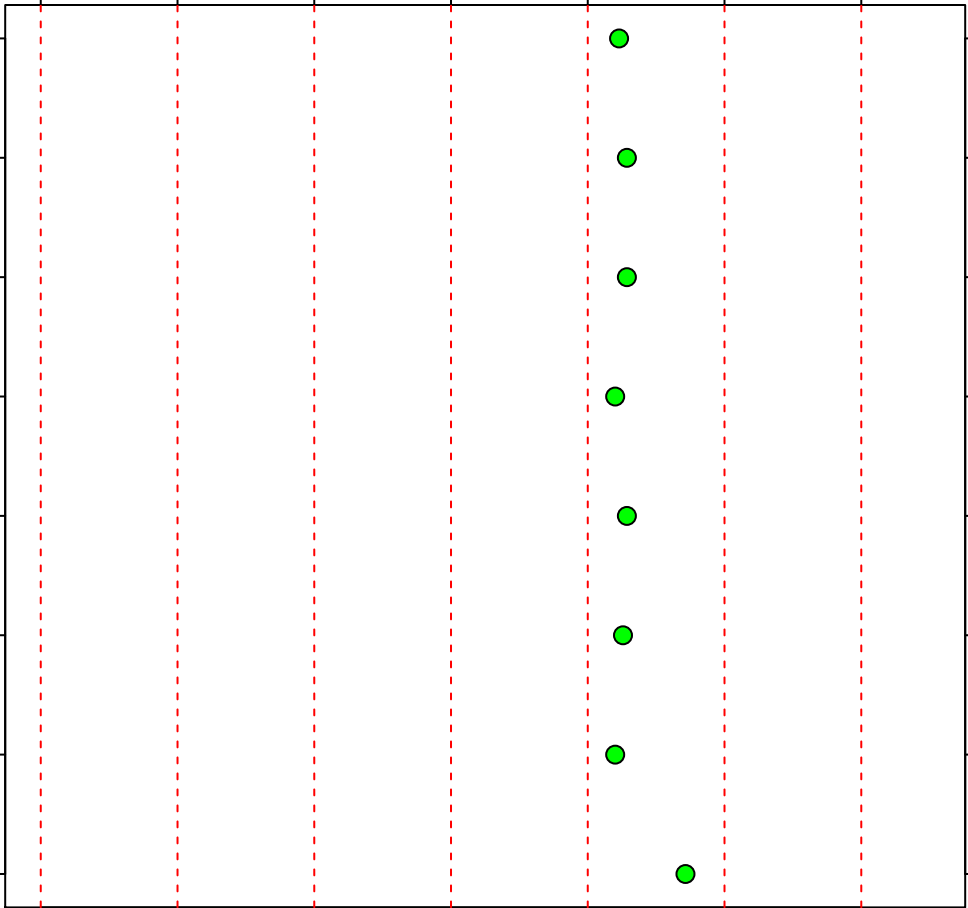

# Patient\_01 B right

'phantom least similar to TG43'

D(Y, N, B, B)

D(Y, N, B, N)

D(Y, N, B, M)

D(N, N, N, N)

D(Y, N, N, N)

D(Y, N, M, M)

D(Y, M, X, X)

D(N, M, X, X)

'phantom most similar to TG43'

-10

-8

-6

-4

-2

0

2

%diff 100\*(GBBS-TG43)/TG43

GBBS(solid model applicator, body, balloon & rectal contrast, packing contrast)

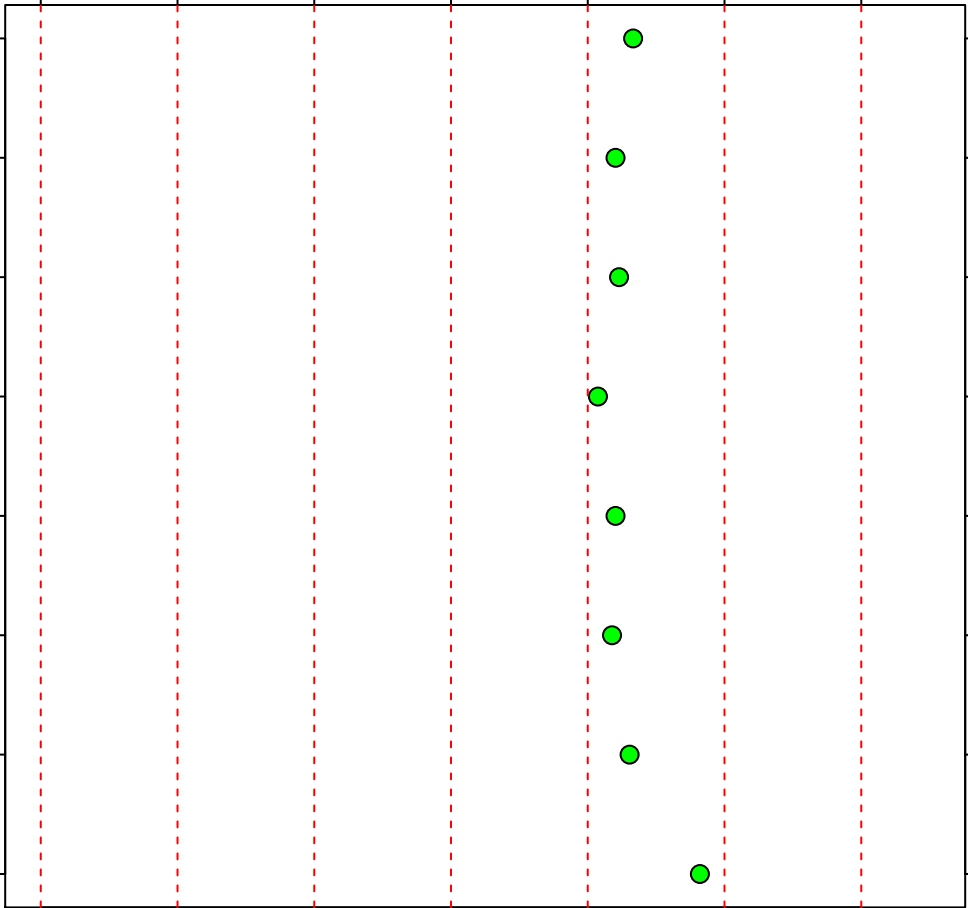



# Patient\_02 B right

'phantom least similar to TG43'

D(Y, N, B, B)

D(Y, N, B, N)

D(Y, N, B, M)

D(N, N, N, N)

D(Y, N, N, N)

D(Y, N, M, M)

D(Y, M, X, X)

D(N, M, X, X)

'phantom most similar to TG43'

-10

-8

-6

-4

-2

0

2

%diff 100\*(GBBS-TG43)/TG43

GBBS(solid model applicator, body, balloon & rectal contrast, packing contrast)

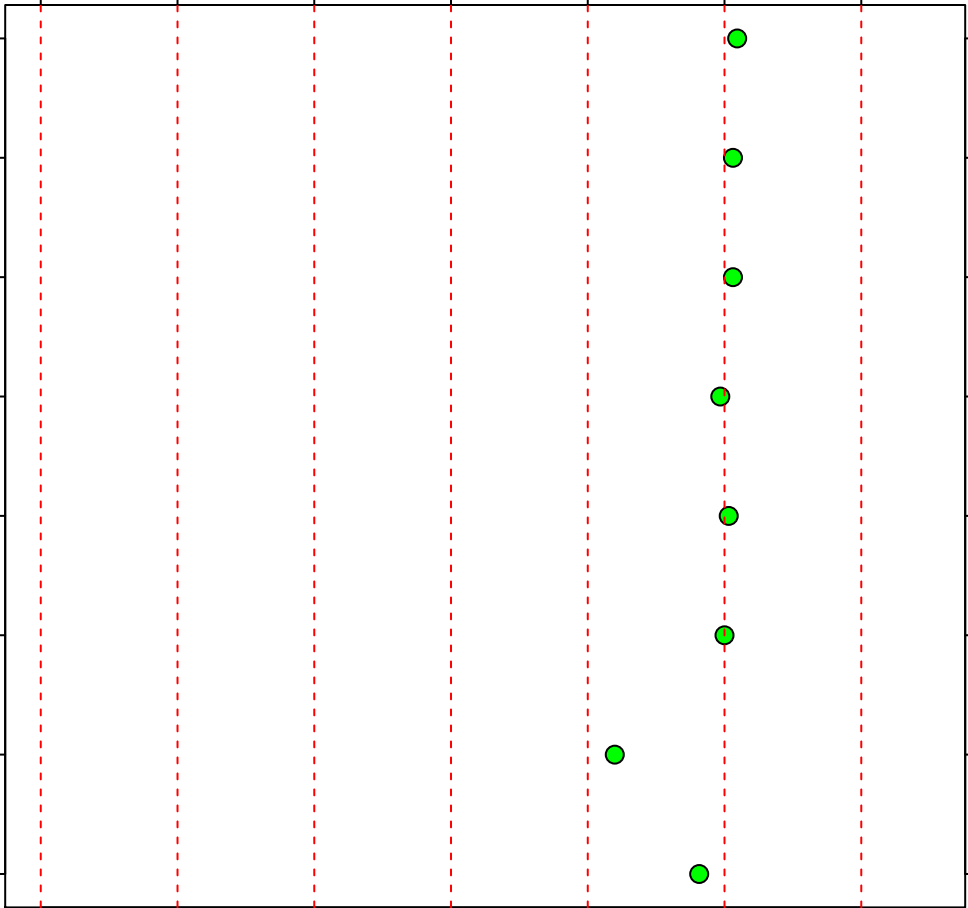

# Patient\_03 B right

'phantom least similar to TG43'

- D(Y, N, B, B)
- D(Y, N, B, N)
- D(Y, N, B, M)
- D(N, N, N, N)
- D(Y, N, N, N)
- D(Y, N, M, M)
- D(Y, M, X, X)
- D(N, M, X, X)

'phantom most similar to TG43'

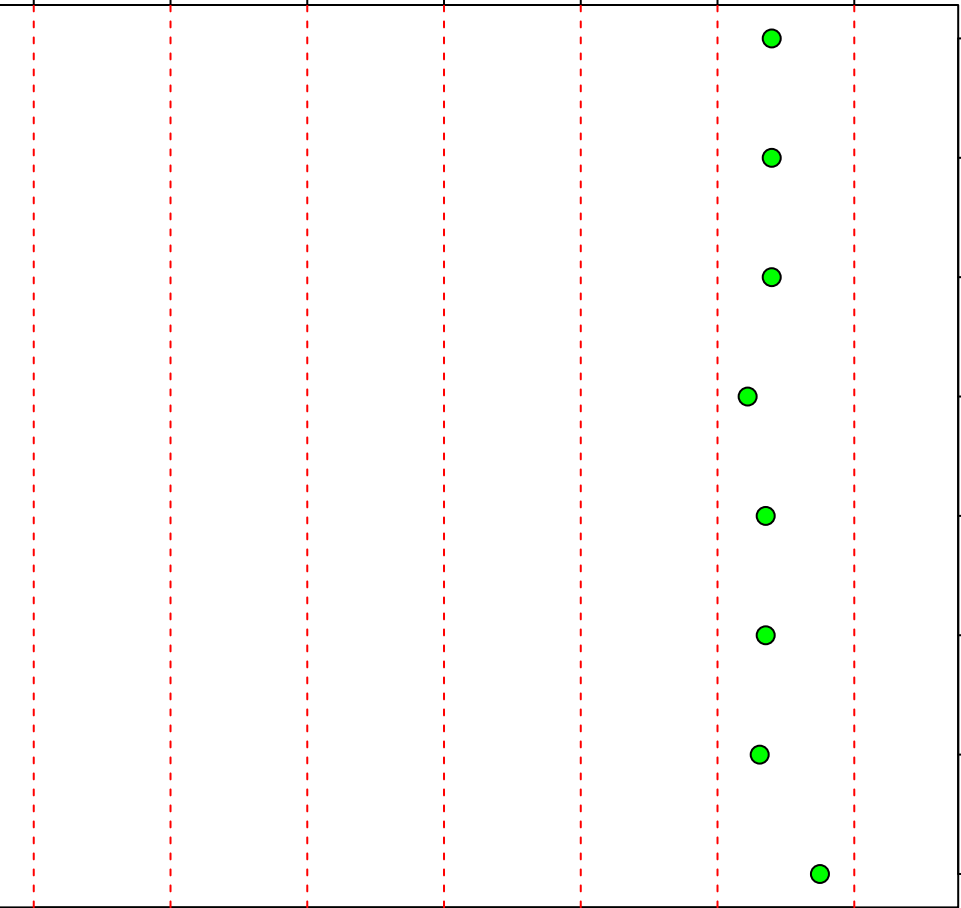

%diff 100\*(GBBS-TG43)/TG43

GBBS(solid model applicator, body, balloon & rectal contrast, packing contrast)

# Patient\_04 B right

'phantom least similar to TG43'

D(Y, N, B, B)

D(Y, N, B, N)

D(Y, N, B, M)

D(N, N, N, N)

D(Y, N, N, N)

D(Y, N, M, M)

D(Y, M, X, X)

D(N, M, X, X)

'phantom most similar to TG43'

-10

-8

-6

-4

-2

0

2

%diff 100\*(GBBS-TG43)/TG43

GBBS(solid model applicator, body, balloon & rectal contrast, packing contrast)

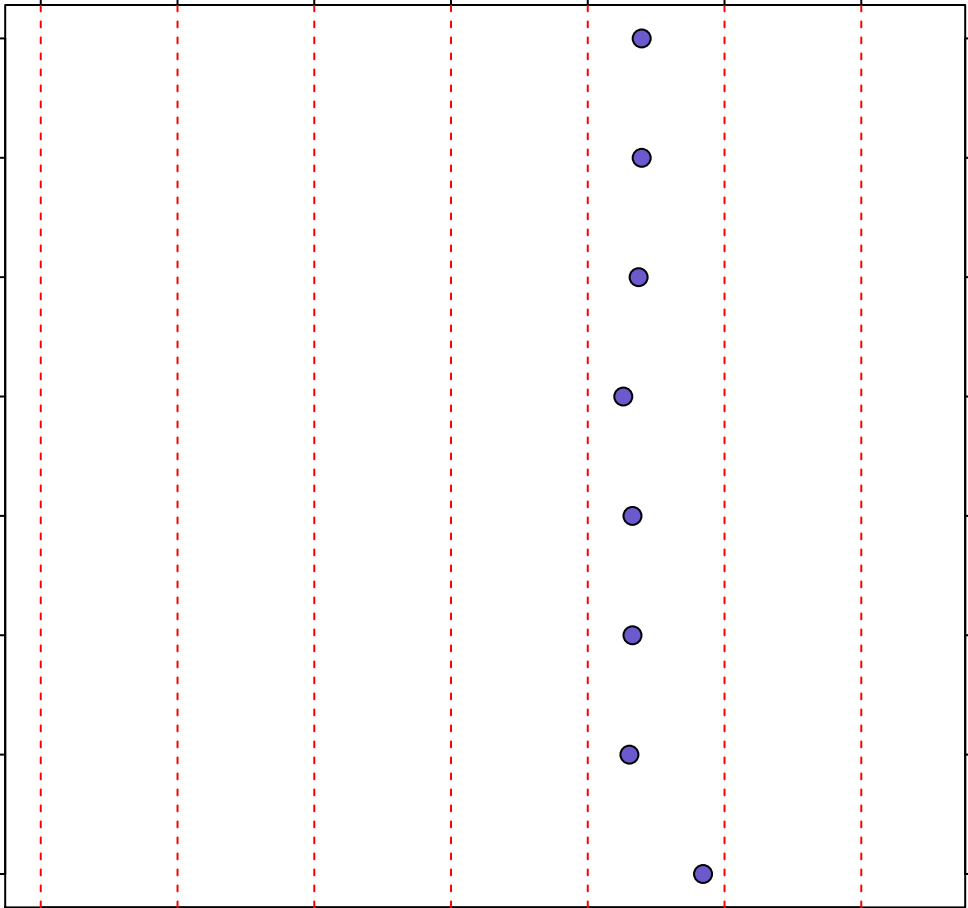

# Patient\_05 B right

'phantom least similar to TG43'

D(Y, N, B, B)

D(Y, N, B, N)

D(Y, N, B, M)

D(N, N, N, N)

D(Y, N, N, N)

D(Y, N, M, M)

D(Y, M, X, X)

D(N, M, X, X)

'phantom most similar to TG43'

-10

-8

-6

-4

-2

0

2

%diff 100\*(GBBS-TG43)/TG43

GBBS(solid model applicator, body, balloon & rectal contrast, packing contrast)

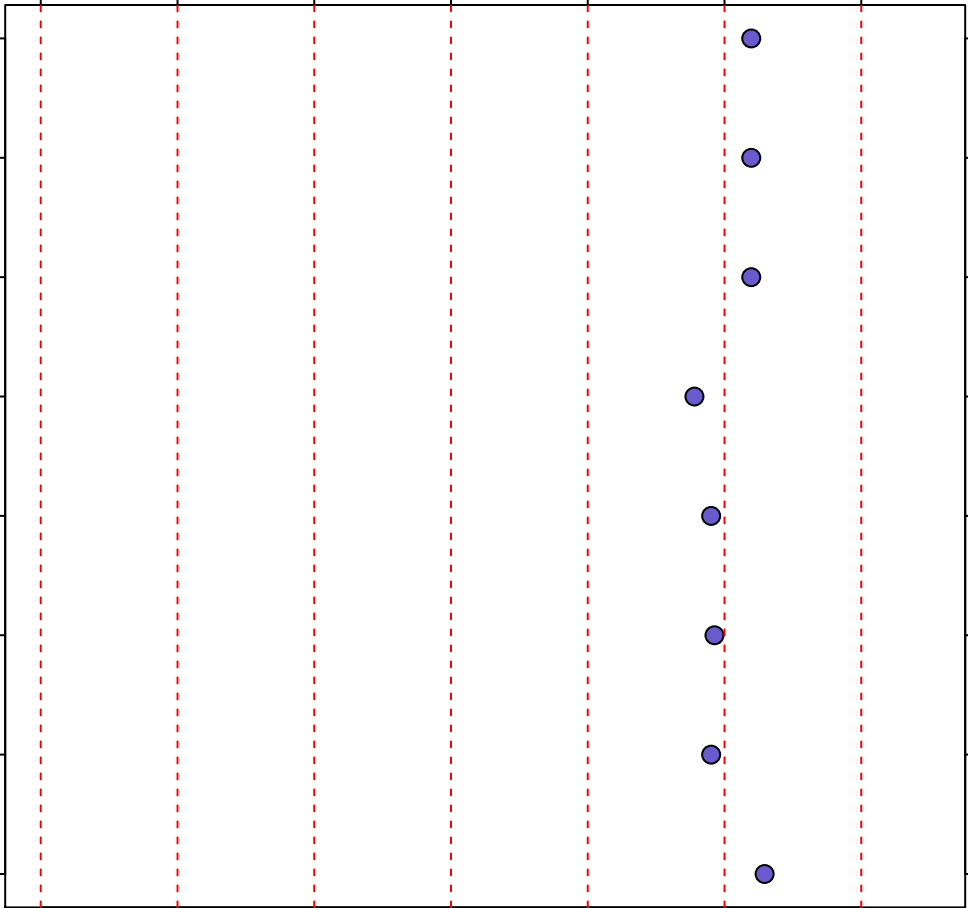

# Patient\_06 B right

'phantom least similar to TG43'

D(Y, N, B, B)

D(Y, N, B, N)

D(Y, N, B, M)

D(N, N, N, N)

D(Y, N, N, N)

D(Y, N, M, M)

D(Y, M, X, X)

D(N, M, X, X)

'phantom most similar to TG43'

-10

-8

-6

-4

-2

0

2

%diff 100\*(GBBS-TG43)/TG43

GBBS(solid model applicator, body, balloon & rectal contrast, packing contrast)

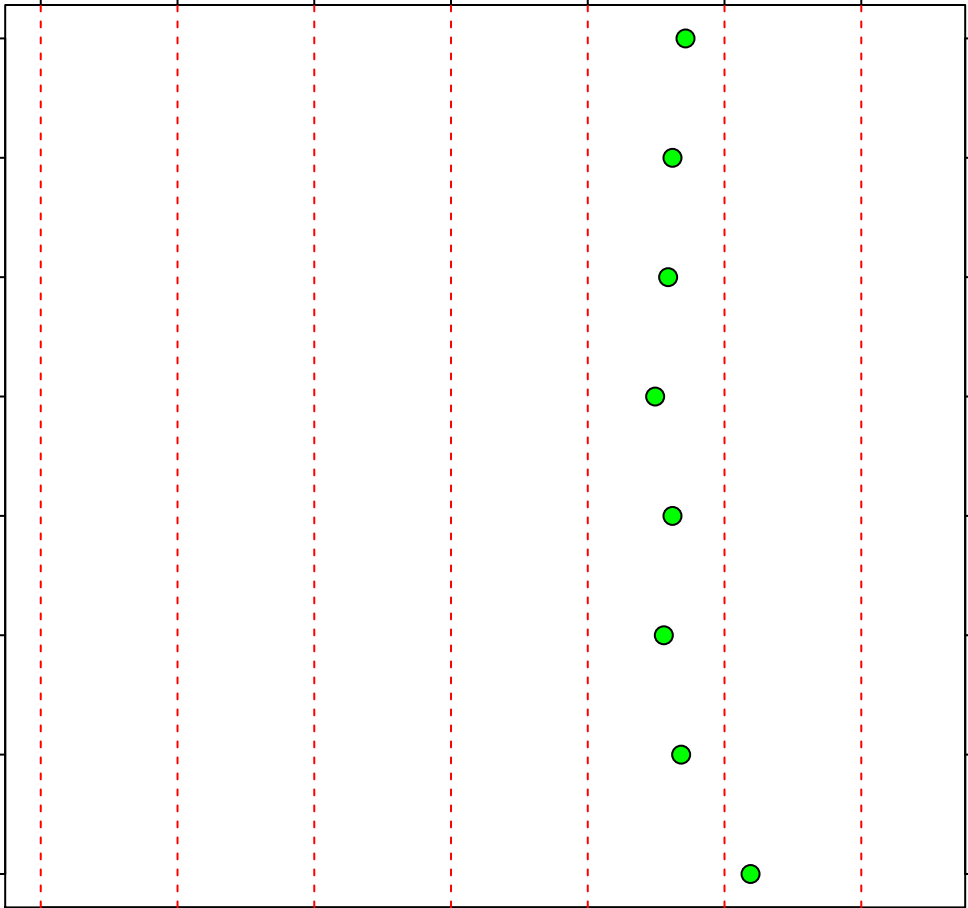

# Patient\_07 B right

'phantom least similar to TG43'

D(Y, N, B, B)

D(Y, N, B, N)

D(Y, N, B, M)

D(N, N, N, N)

D(Y, N, N, N)

D(Y, N, M, M)

D(Y, M, X, X)

D(N, M, X, X)

'phantom most similar to TG43'

-10

-8

-6

-4

-2

0

2

%diff 100\*(GBBS-TG43)/TG43

GBBS(solid model applicator, body, balloon & rectal contrast, packing contrast)

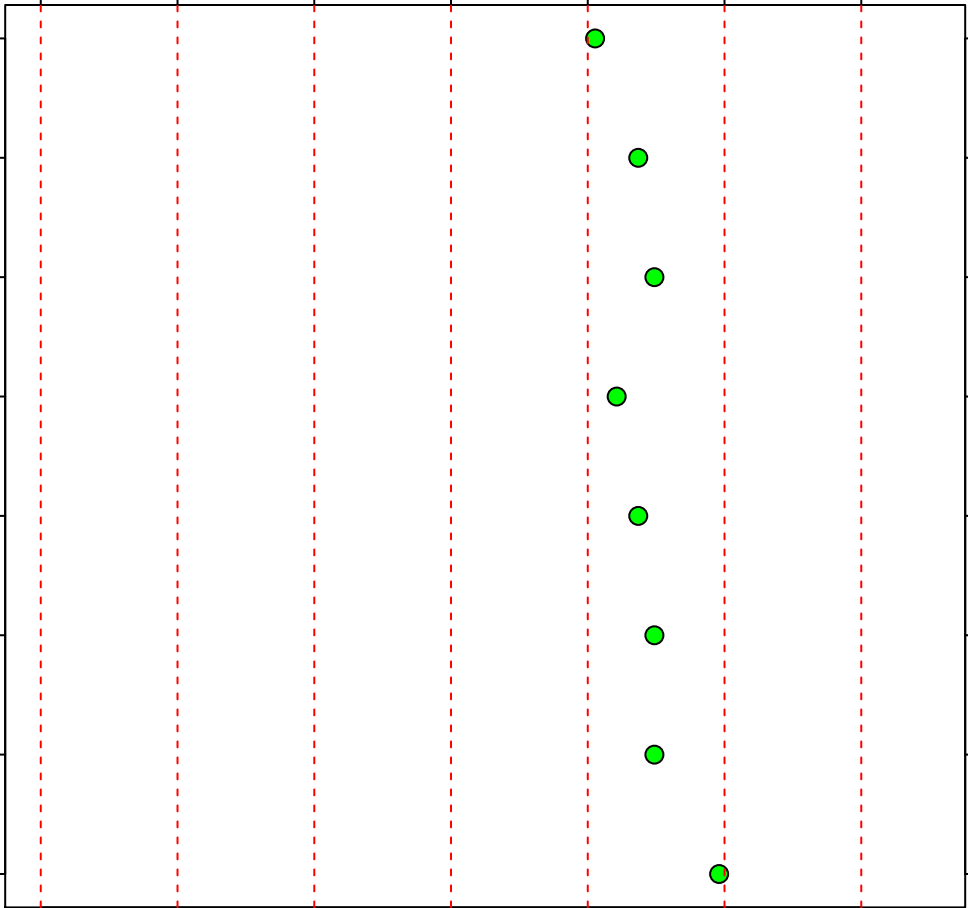

# Patient\_08 B right

'phantom least similar to TG43'

- D(Y, N, B, B)
- D(Y, N, B, N)
- D(Y, N, B, M)
- D(N, N, N, N)
- D(Y, N, N, N)
- D(Y, N, M, M)
- D(Y, M, X, X)
- D(N, M, X, X)

'phantom most similar to TG43'

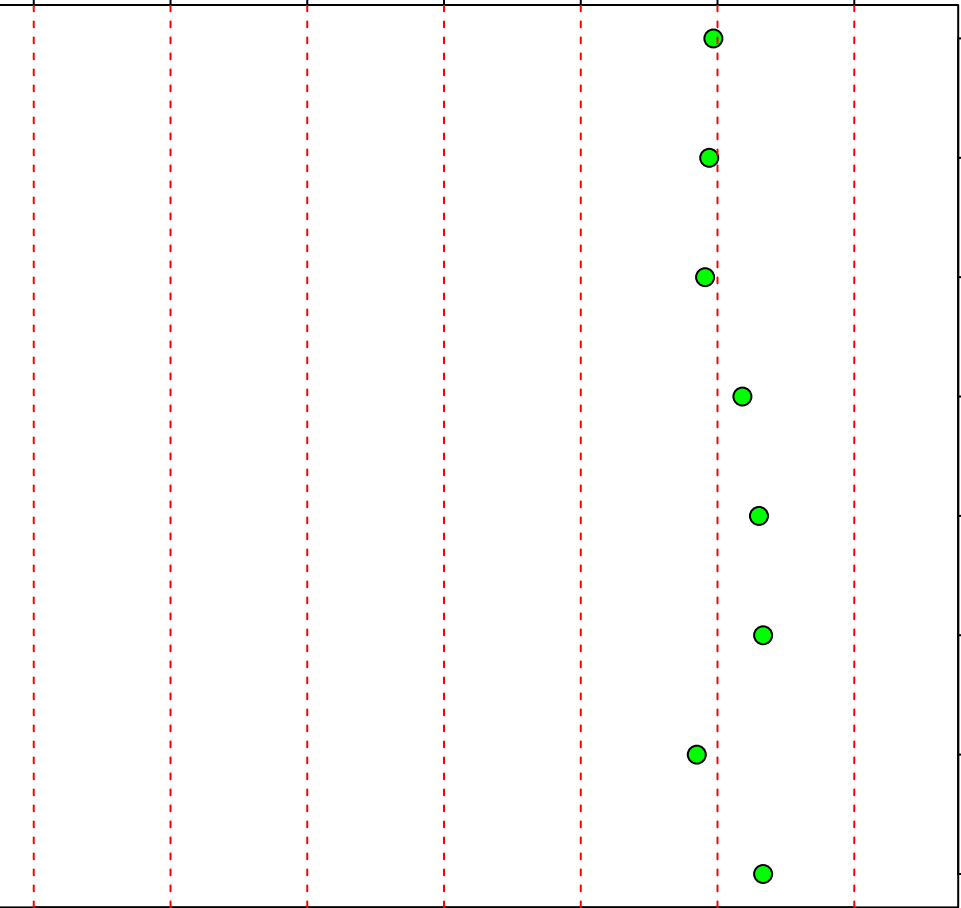

%diff 100\*(GBBS-TG43)/TG43

GBBS(solid model applicator, body, balloon & rectal contrast, packing contrast)

# Patient\_09 B right

'phantom least similar to TG43'

D(Y, N, B, B)

D(Y, N, B, N)

D(Y, N, B, M)

D(N, N, N, N)

D(Y, N, N, N)

D(Y, N, M, M)

D(Y, M, X, X)

D(N, M, X, X)

'phantom most similar to TG43'

-10 -8 -6 -4 -2 0 2

%diff 100\*(GBBS-TG43)/TG43

GBBS(solid model applicator, body, balloon & rectal contrast, packing contrast)

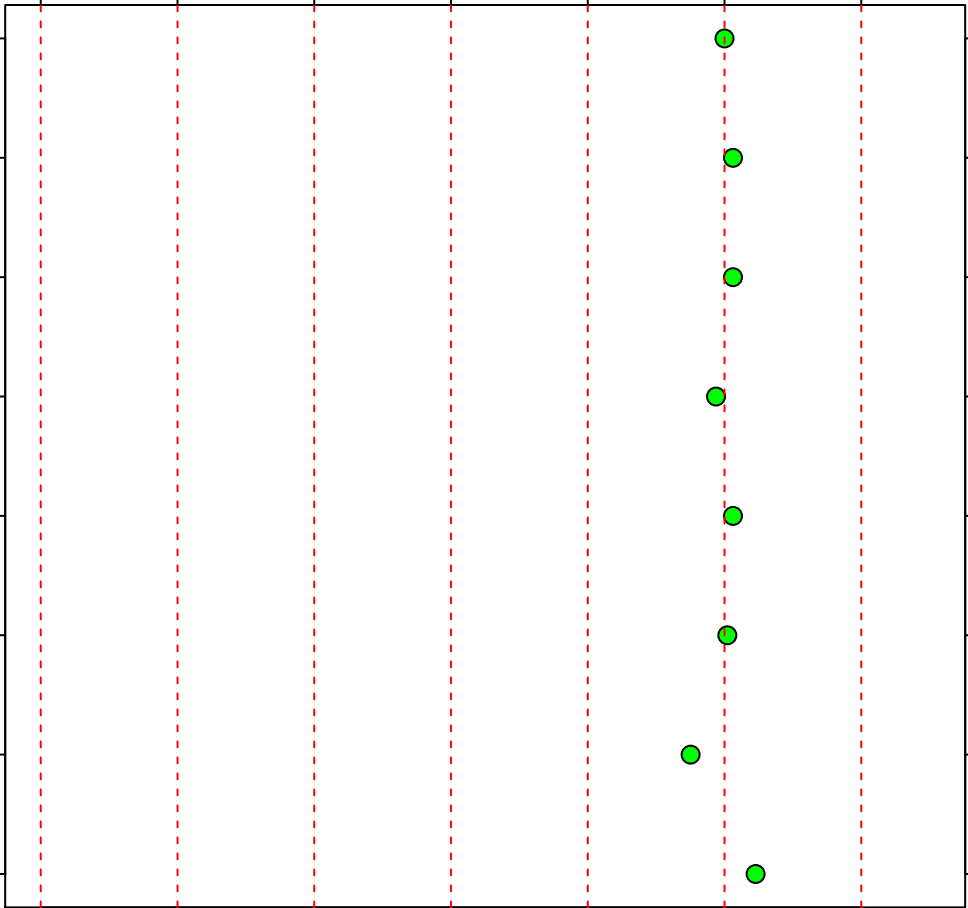



# Patient\_10 B right

'phantom least similar to TG43'

D(Y, N, B, B)

D(Y, N, B, N)

D(Y, N, B, M)

D(N, N, N, N)

D(Y, N, N, N)

D(Y, N, M, M)

D(Y, M, X, X)

D(N, M, X, X)

'phantom most similar to TG43'



%diff 100\*(GBBS-TG43)/TG43

GBBS(solid model applicator, body, balloon & rectal contrast, packing contrast)

# Patient\_11 B right

'phantom least similar to TG43'

D(Y, N, B, B)

D(Y, N, B, N)

D(Y, N, B, M)

D(N, N, N, N)

D(Y, N, N, N)

D(Y, N, M, M)

D(Y, M, X, X)

D(N, M, X, X)

'phantom most similar to TG43'

-10

-8

-6

-4

-2

0

2

%diff 100\*(GBBS-TG43)/TG43

GBBS(solid model applicator, body, balloon & rectal contrast, packing contrast)

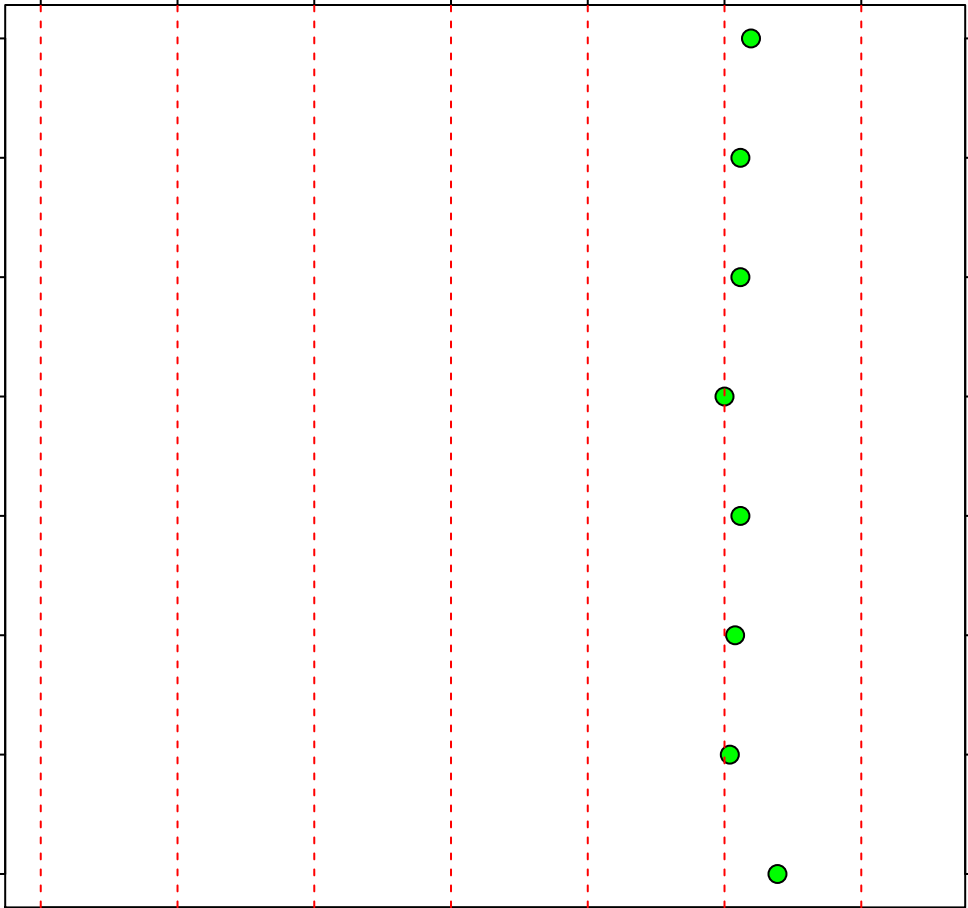

# Patient\_12 B right

'phantom least similar to TG43'

D(Y, N, B, B)

D(Y, N, B, N)

D(Y, N, B, M)

D(N, N, N, N)

D(Y, N, N, N)

D(Y, N, M, M)

D(Y, M, X, X)

D(N, M, X, X)

'phantom most similar to TG43'

-10 -8 -6 -4 -2 0 2

%diff 100\*(GBBS-TG43)/TG43

GBBS(solid model applicator, body, balloon & rectal contrast, packing contrast)

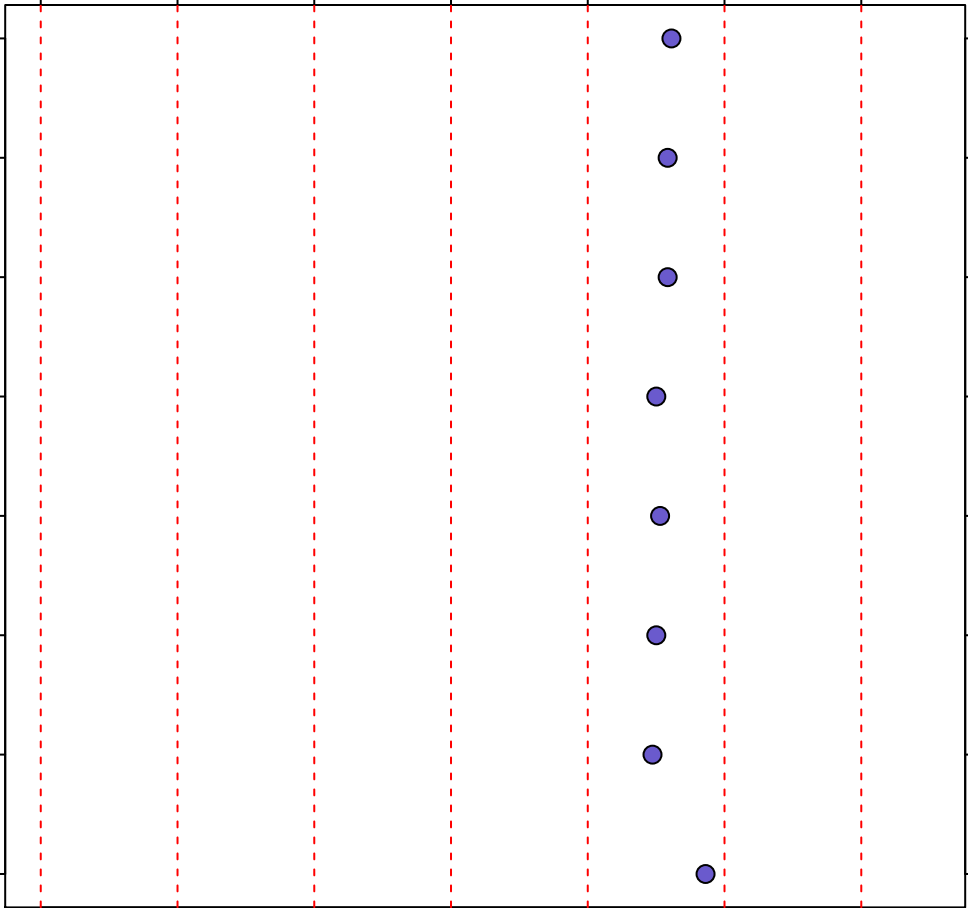

# Patient\_13 B right

'phantom least similar to TG43'

D(Y, N, B, B)

D(Y, N, B, N)

D(Y, N, B, M)

D(N, N, N, N)

D(Y, N, N, N)

D(Y, N, M, M)

D(Y, M, X, X)

D(N, M, X, X)

'phantom most similar to TG43'

-10

-8

-6

-4

-2

0

2

%diff 100\*(GBBS-TG43)/TG43

GBBS(solid model applicator, body, balloon & rectal contrast, packing contrast)

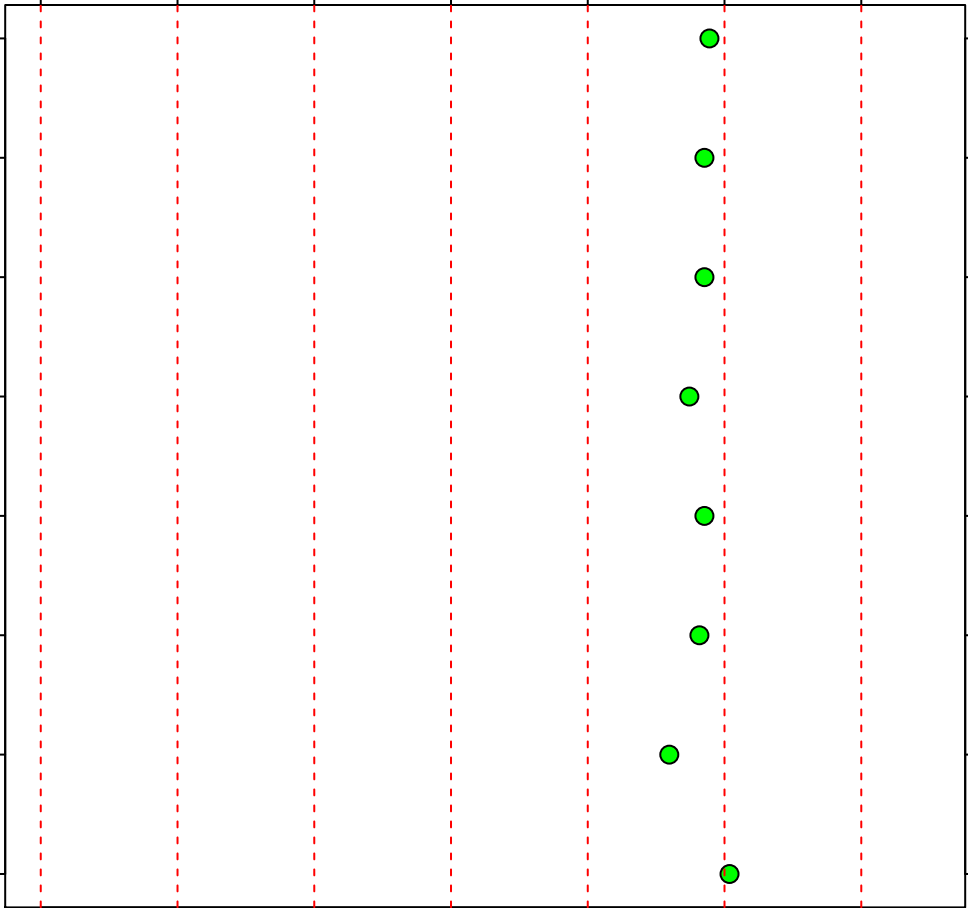

# Patient\_14 B right

'phantom least similar to TG43'

D(Y, N, B, B)

D(Y, N, B, N)

D(Y, N, B, M)

D(N, N, N, N)

D(Y, N, N, N)

D(Y, N, M, M)

D(Y, M, X, X)

D(N, M, X, X)

'phantom most similar to TG43'

-10

-8

-6

-4

-2

0

2

%diff 100\*(GBBS-TG43)/TG43

GBBS(solid model applicator, body, balloon & rectal contrast, packing contrast)

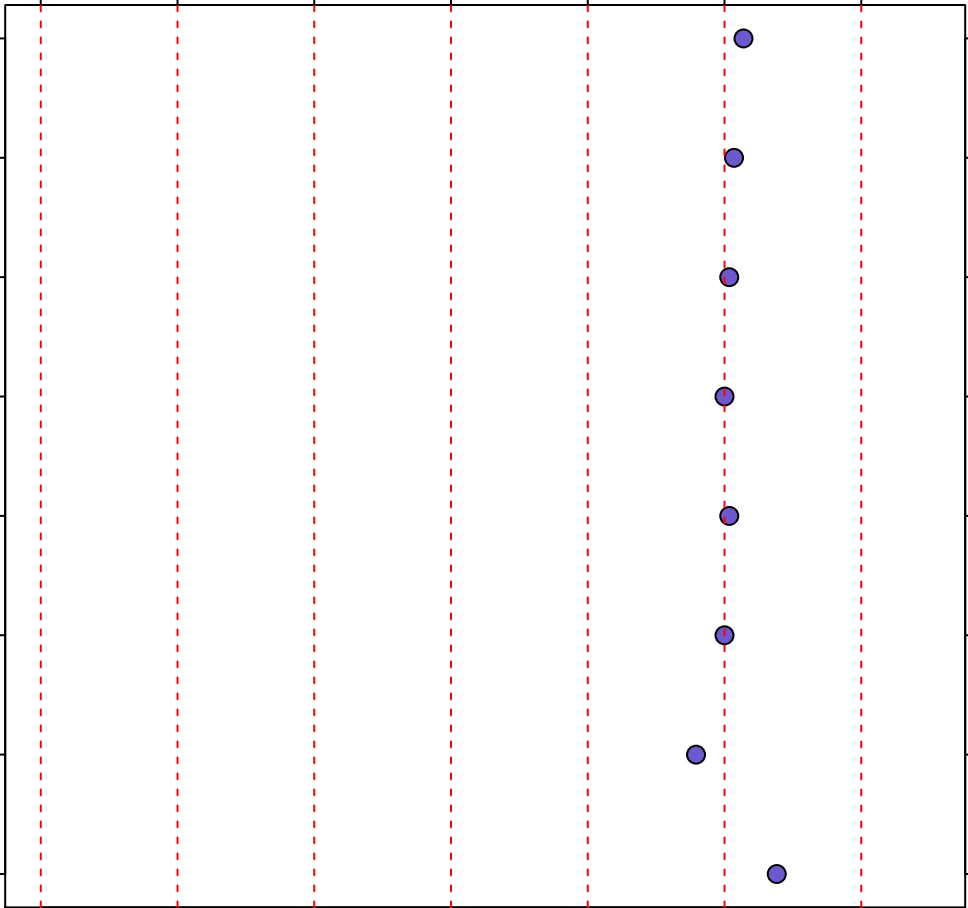

# Patient\_15 B right

'phantom least similar to TG43'

- D(Y, N, B, B)
- D(Y, N, B, N)
- D(Y, N, B, M)
- D(N, N, N, N)
- D(Y, N, N, N)
- D(Y, N, M, M)
- D(Y, M, X, X)
- D(N, M, X, X)

'phantom most similar to TG43'

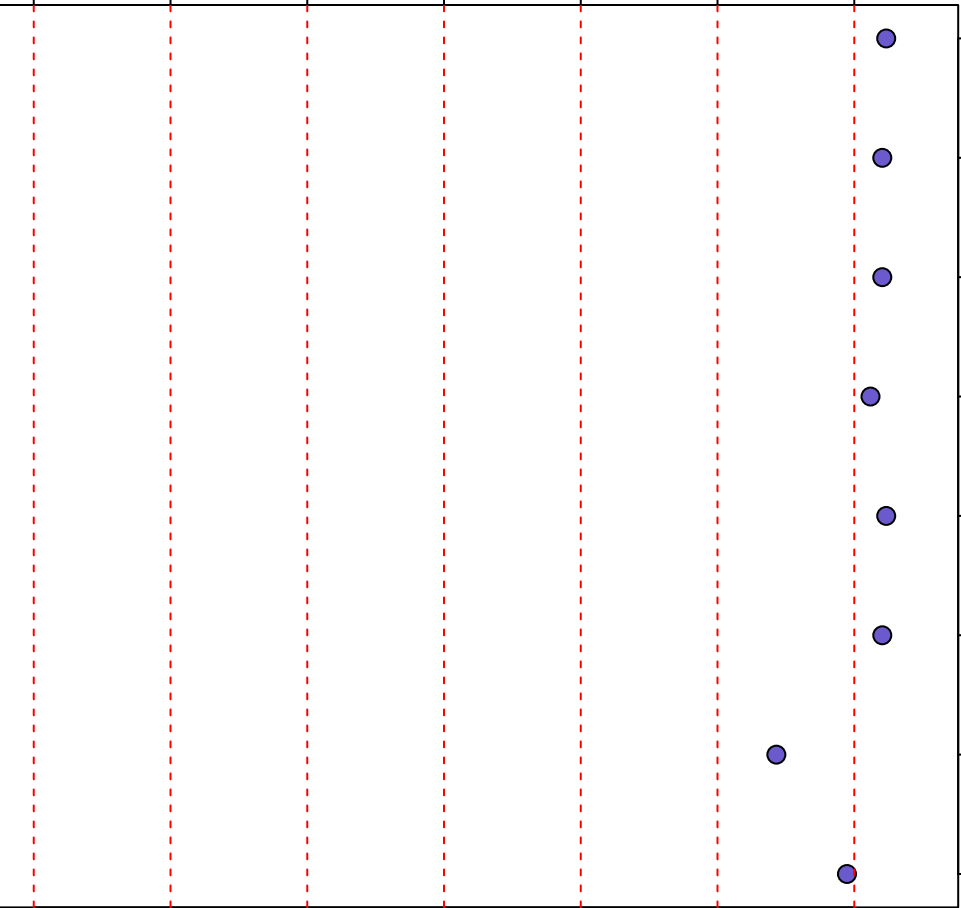

%diff 100\*(GBBS-TG43)/TG43

GBBS(solid model applicator, body, balloon & rectal contrast, packing contrast)

# Patient\_16 B right

'phantom least similar to TG43'

D(Y, N, B, B)

D(Y, N, B, N)

D(Y, N, B, M)

D(N, N, N, N)

D(Y, N, N, N)

D(Y, N, M, M)

D(Y, M, X, X)

D(N, M, X, X)

'phantom most similar to TG43'

-10

-8

-6

-4

-2

0

2

%diff 100\*(GBBS-TG43)/TG43

GBBS(solid model applicator, body, balloon & rectal contrast, packing contrast)

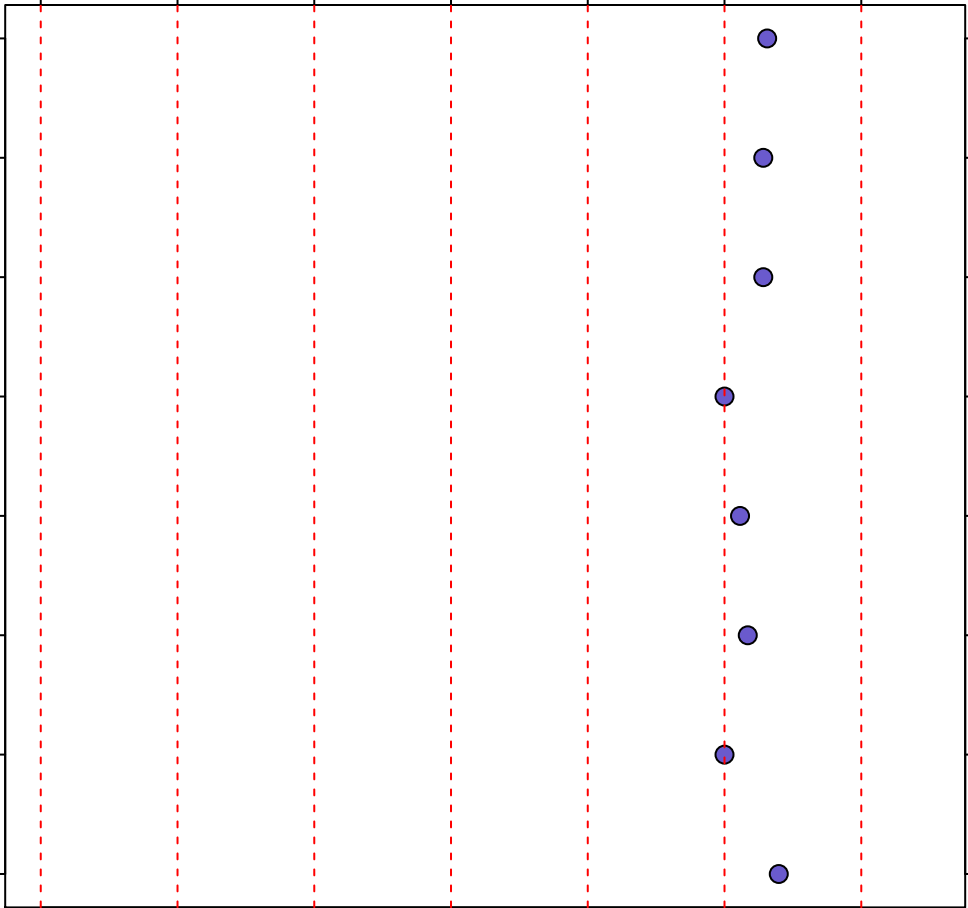

# Patient\_17 B right

'phantom least similar to TG43'

D(Y, N, B, B)

D(Y, N, B, N)

D(Y, N, B, M)

D(N, N, N, N)

D(Y, N, N, N)

D(Y, N, M, M)

D(Y, M, X, X)

D(N, M, X, X)

'phantom most similar to TG43'

-10

-8

-6

-4

-2

0

2

%diff 100\*(GBBS-TG43)/TG43

GBBS(solid model applicator, body, balloon & rectal contrast, packing contrast)

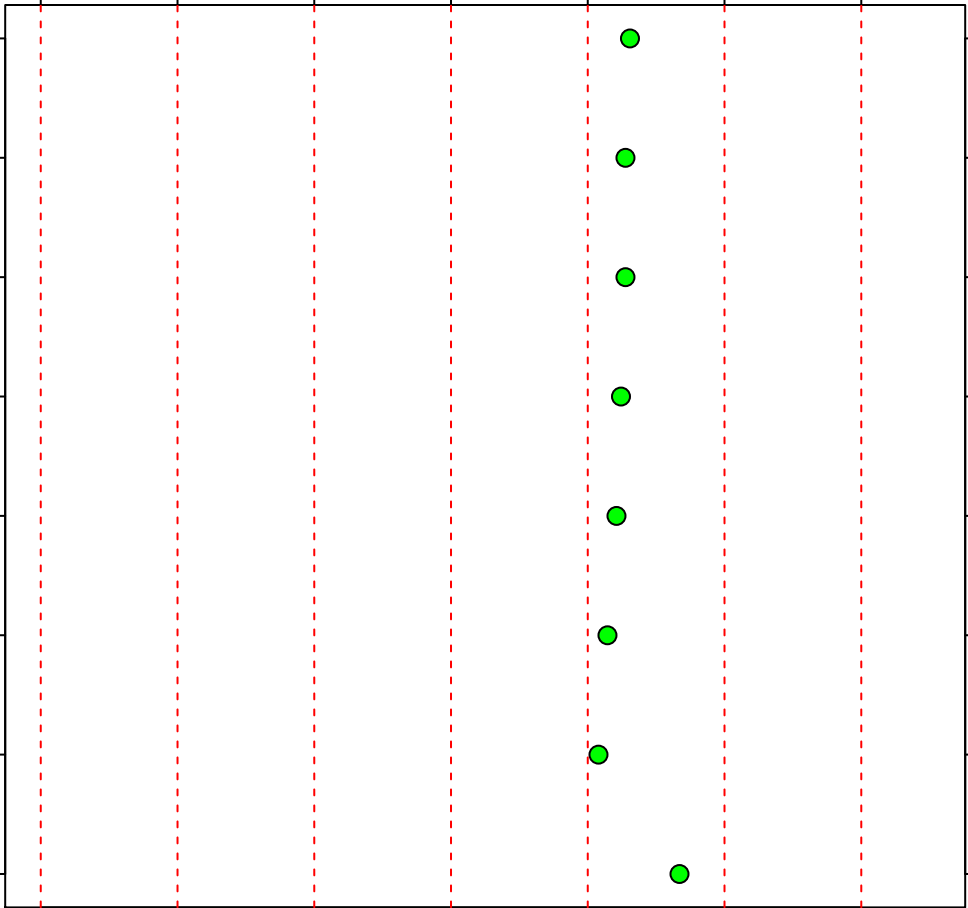



# Patient\_18 B right

'phantom least similar to TG43'

D(Y, N, B, B)

D(Y, N, B, N)

D(Y, N, B, M)

D(N, N, N, N)

D(Y, N, N, N)

D(Y, N, M, M)

D(Y, M, X, X)

D(N, M, X, X)

'phantom most similar to TG43'

-10

-8

-6

-4

-2

0

2

%diff 100\*(GBBS-TG43)/TG43

GBBS(solid model applicator, body, balloon & rectal contrast, packing contrast)

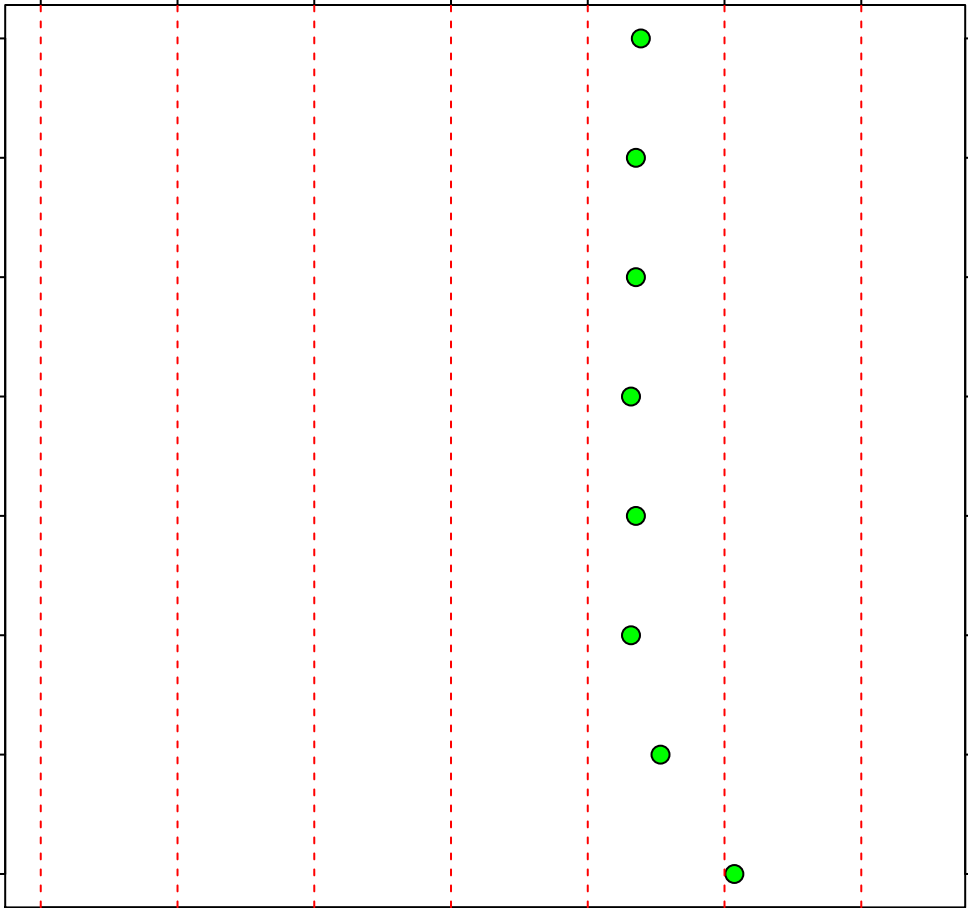

# Patient\_19 B right

'phantom least similar to TG43'

- D(Y, N, B, B)
- D(Y, N, B, N)
- D(Y, N, B, M)
- D(N, N, N, N)
- D(Y, N, N, N)
- D(Y, N, M, M)
- D(Y, M, X, X)
- D(N, M, X, X)

'phantom most similar to TG43'

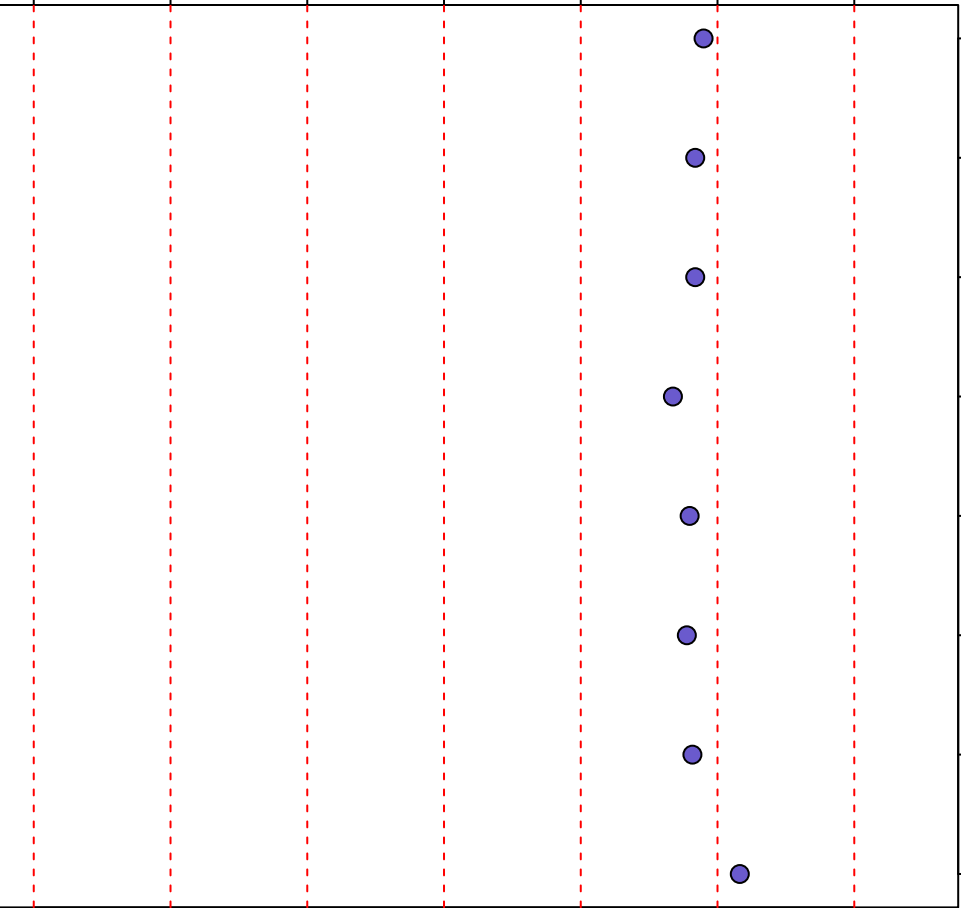

%diff 100\*(GBBS-TG43)/TG43

GBBS(solid model applicator, body, balloon & rectal contrast, packing contrast)

# Patient\_20 B right

'phantom least similar to TG43'

D(Y, N, B, B)

D(Y, N, B, N)

D(Y, N, B, M)

D(N, N, N, N)

D(Y, N, N, N)

D(Y, N, M, M)

D(Y, M, X, X)

D(N, M, X, X)

'phantom most similar to TG43'



%diff 100\*(GBBS-TG43)/TG43

GBBS(solid model applicator, body, balloon & rectal contrast, packing contrast)

# Patient\_21 B right

'phantom least similar to TG43'

- D(Y, N, B, B)
- D(Y, N, B, N)
- D(Y, N, B, M)
- D(N, N, N, N)
- D(Y, N, N, N)
- D(Y, N, M, M)
- D(Y, M, X, X)
- D(N, M, X, X)

'phantom most similar to TG43'

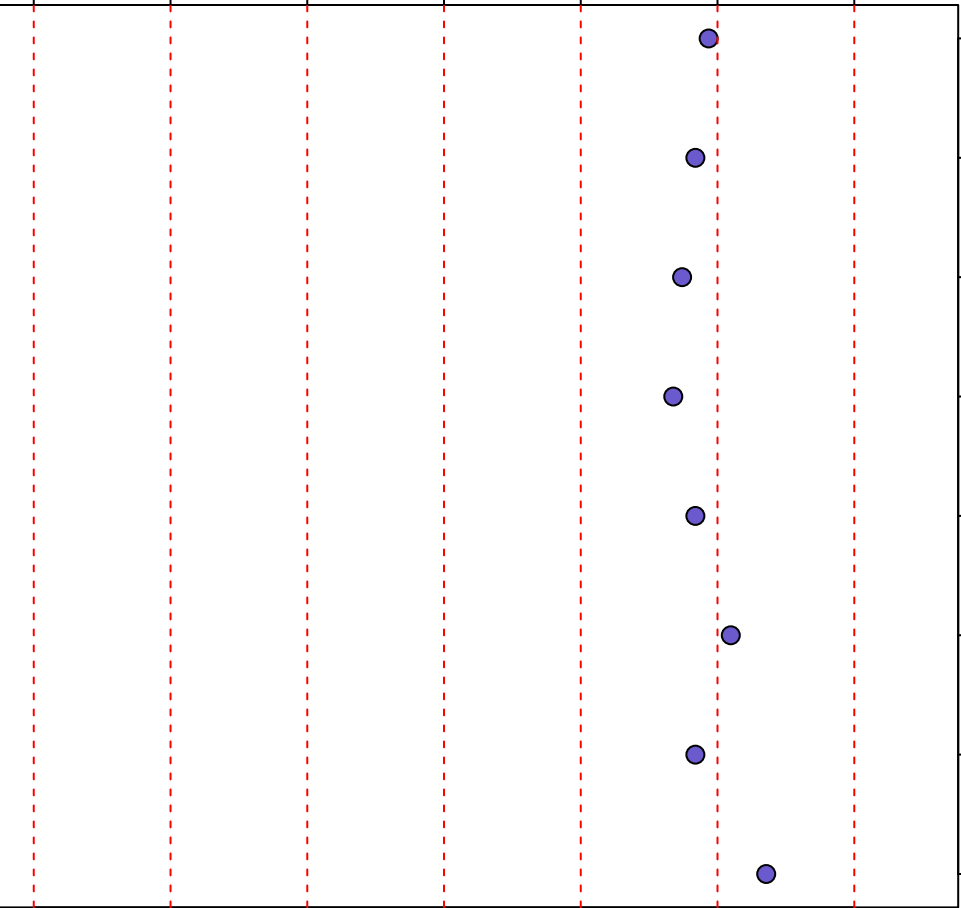

%diff 100\*(GBBS-TG43)/TG43

GBBS(solid model applicator, body, balloon & rectal contrast, packing contrast)

# Patient\_22 B right

'phantom least similar to TG43'

D(Y, N, B, B)

D(Y, N, B, N)

D(Y, N, B, M)

D(N, N, N, N)

D(Y, N, N, N)

D(Y, N, M, M)

D(Y, M, X, X)

D(N, M, X, X)

'phantom most similar to TG43'

-10 -8 -6 -4 -2 0 2

%diff 100\*(GBBS-TG43)/TG43

GBBS(solid model applicator, body, balloon & rectal contrast, packing contrast)

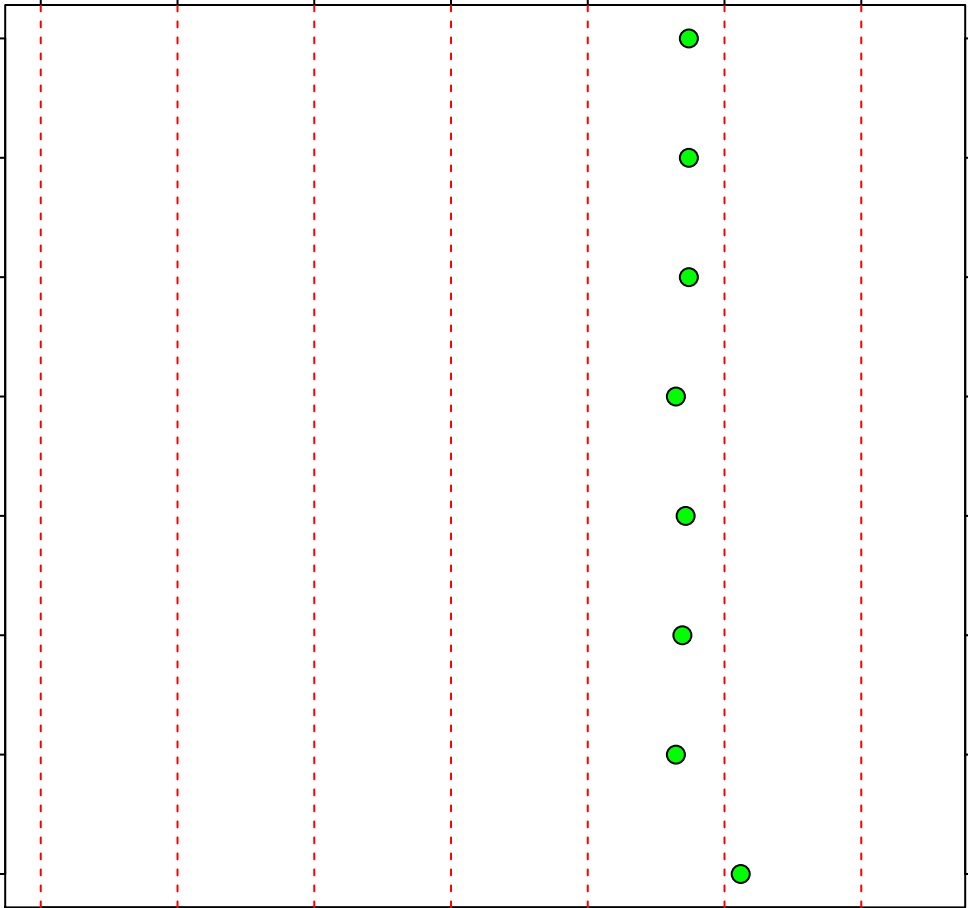

# Patient\_23 B right

'phantom least similar to TG43'

D(Y, N, B, B)

D(Y, N, B, N)

D(Y, N, B, M)

D(N, N, N, N)

D(Y, N, N, N)

D(Y, N, M, M)

D(Y, M, X, X)

D(N, M, X, X)

'phantom most similar to TG43'

-10

-8

-6

-4

-2

0

2

%diff 100\*(GBBS-TG43)/TG43

GBBS(solid model applicator, body, balloon & rectal contrast, packing contrast)

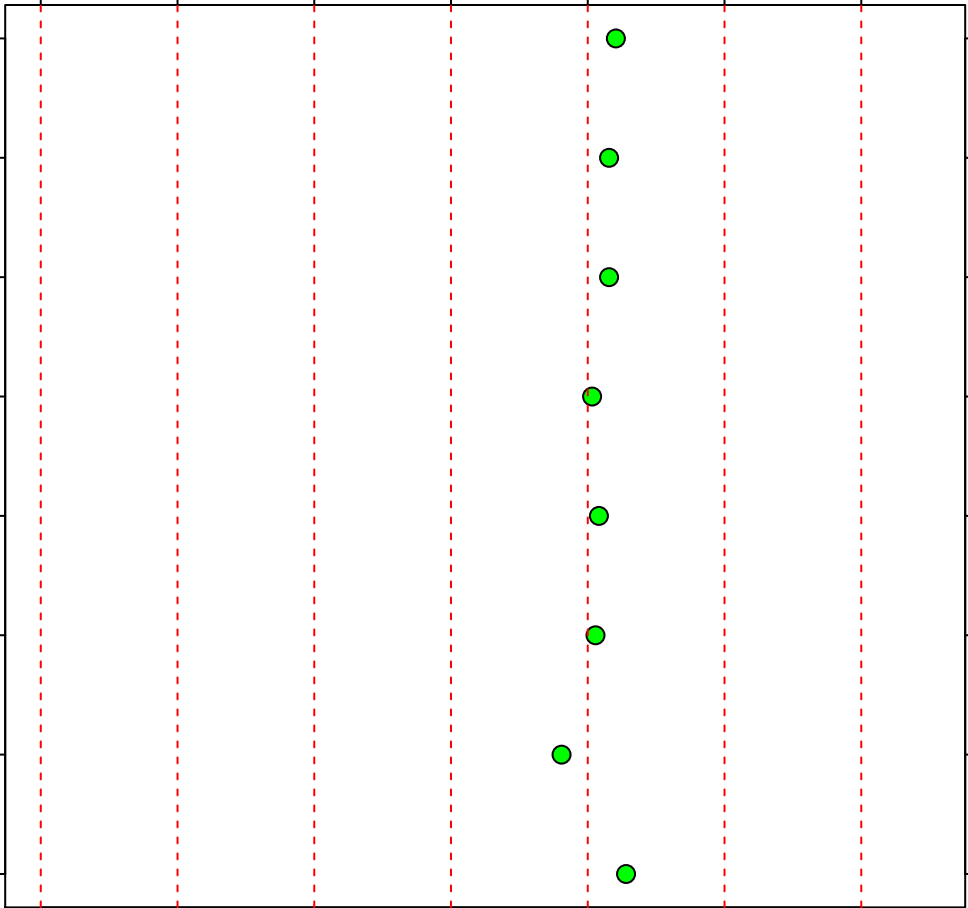

# Patient\_24 B right

'phantom least similar to TG43'

D(Y, N, B, B)

D(Y, N, B, N)

D(Y, N, B, M)

D(N, N, N, N)

D(Y, N, N, N)

D(Y, N, M, M)

D(Y, M, X, X)

D(N, M, X, X)

'phantom most similar to TG43'

-10 -8 -6 -4 -2 0 2

%diff 100\*(GBBS-TG43)/TG43

GBBS(solid model applicator, body, balloon & rectal contrast, packing contrast)

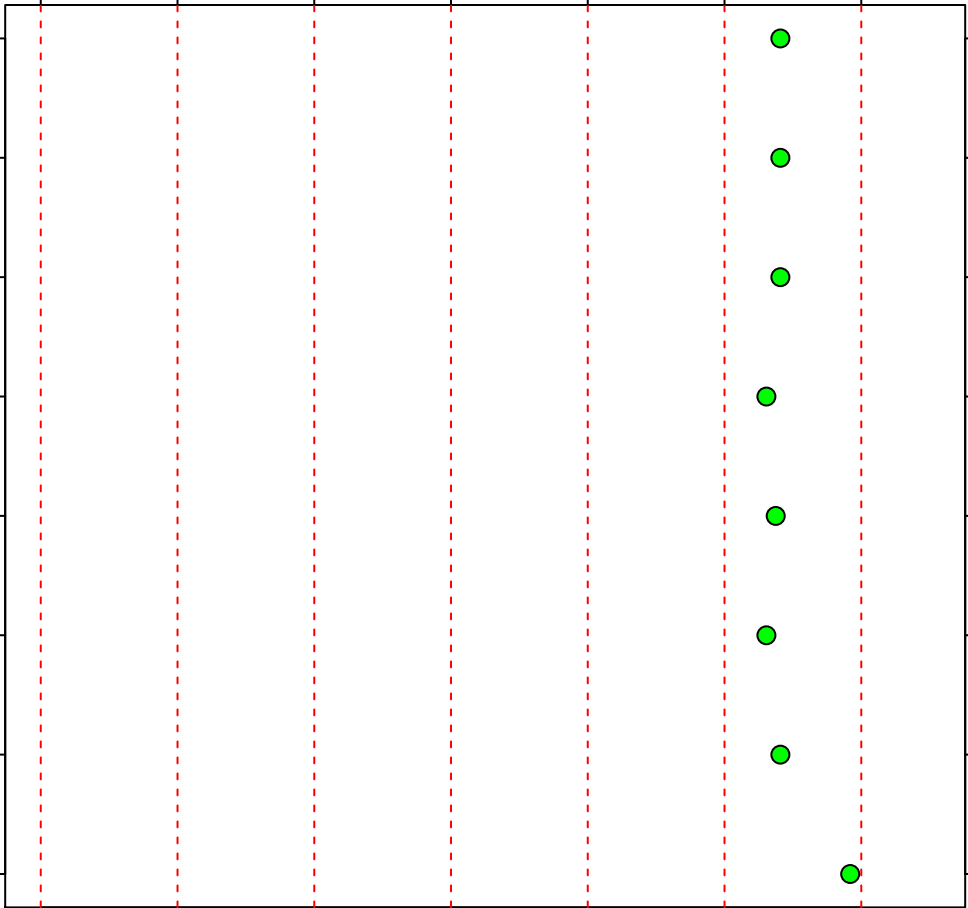

# Patient\_25 B right

'phantom least similar to TG43'

D(Y, N, B, B)

D(Y, N, B, N)

D(Y, N, B, M)

D(N, N, N, N)

D(Y, N, N, N)

D(Y, N, M, M)

D(Y, M, X, X)

D(N, M, X, X)

'phantom most similar to TG43'

-10

-8

-6

-4

-2

0

2

%diff 100\*(GBBS-TG43)/TG43

GBBS(solid model applicator, body, balloon & rectal contrast, packing contrast)

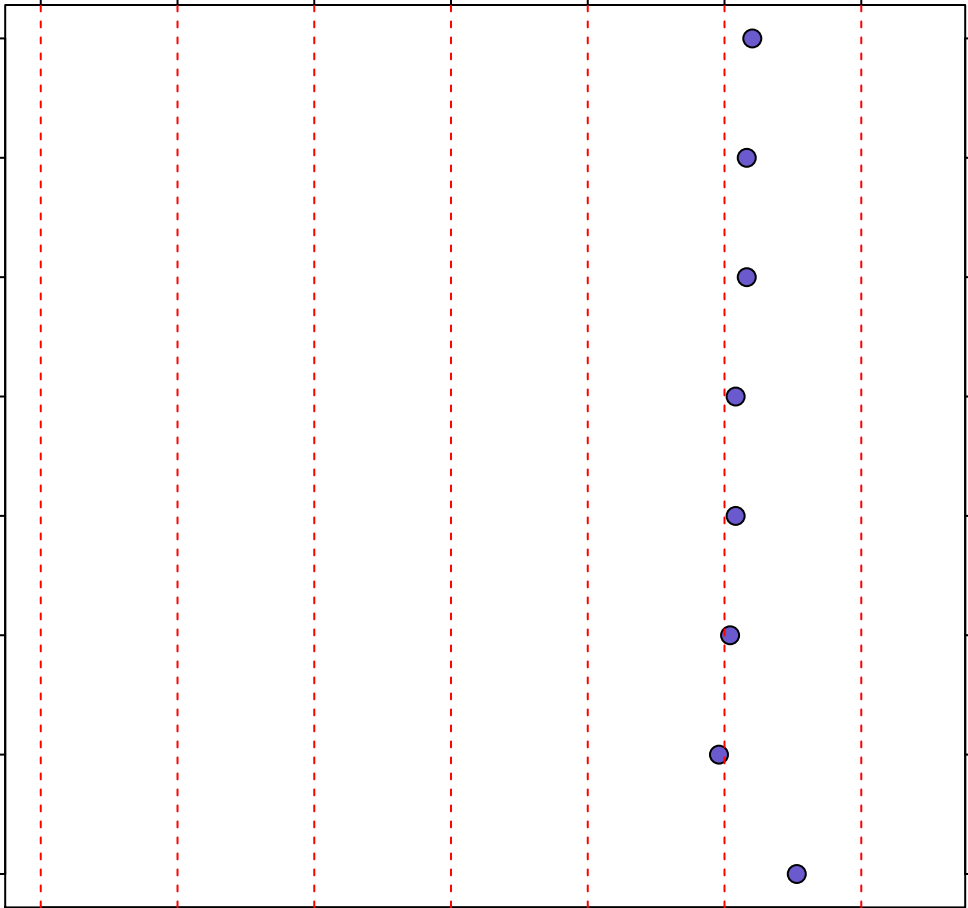



# Patient\_26 B right

'phantom least similar to TG43'

D(Y, N, B, B)

D(Y, N, B, N)

D(Y, N, B, M)

D(N, N, N, N)

D(Y, N, N, N)

D(Y, N, M, M)

D(Y, M, X, X)

D(N, M, X, X)

'phantom most similar to TG43'

-10

-8

-6

-4

-2

0

2

%diff 100\*(GBBS-TG43)/TG43

GBBS(solid model applicator, body, balloon & rectal contrast, packing contrast)

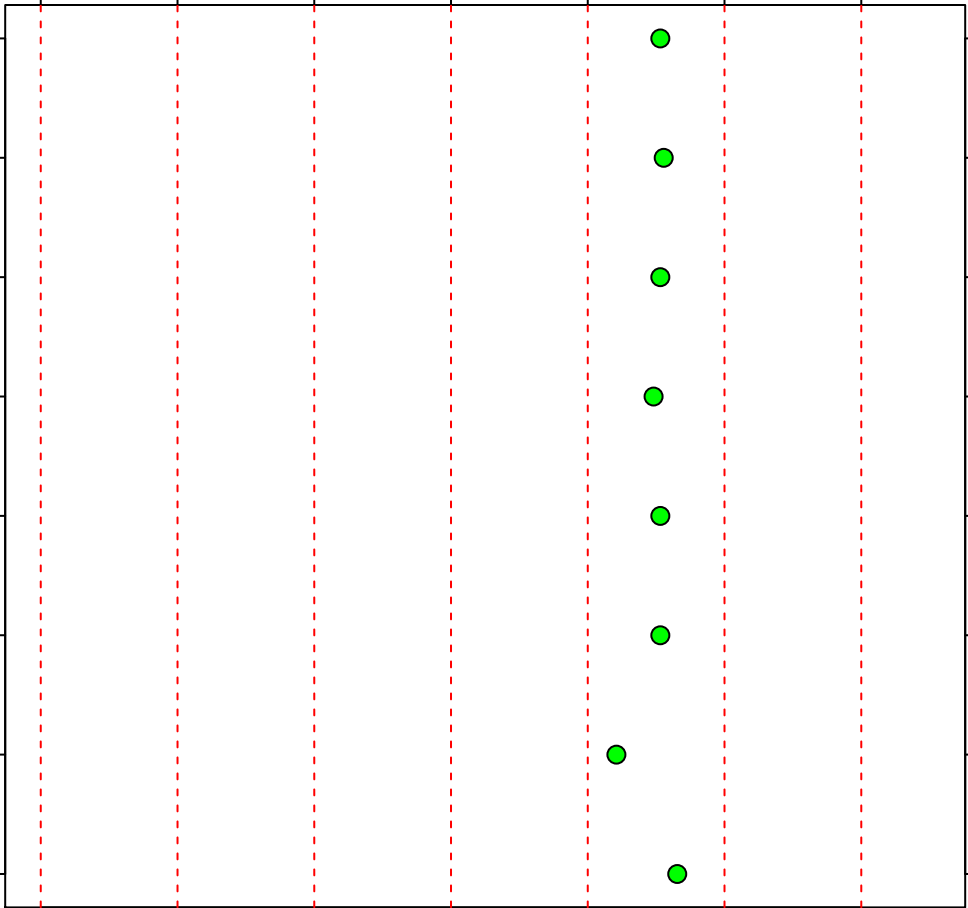

# Patient\_01 ICRU bladder

'phantom least similar to TG43'

- D(Y, N, B, B)
- D(Y, N, B, N)
- D(Y, N, B, M)
- D(N, N, N, N)
- D(Y, N, N, N)
- D(Y, N, M, M)
- D(Y, M, X, X)
- D(N, M, X, X)

'phantom most similar to TG43'

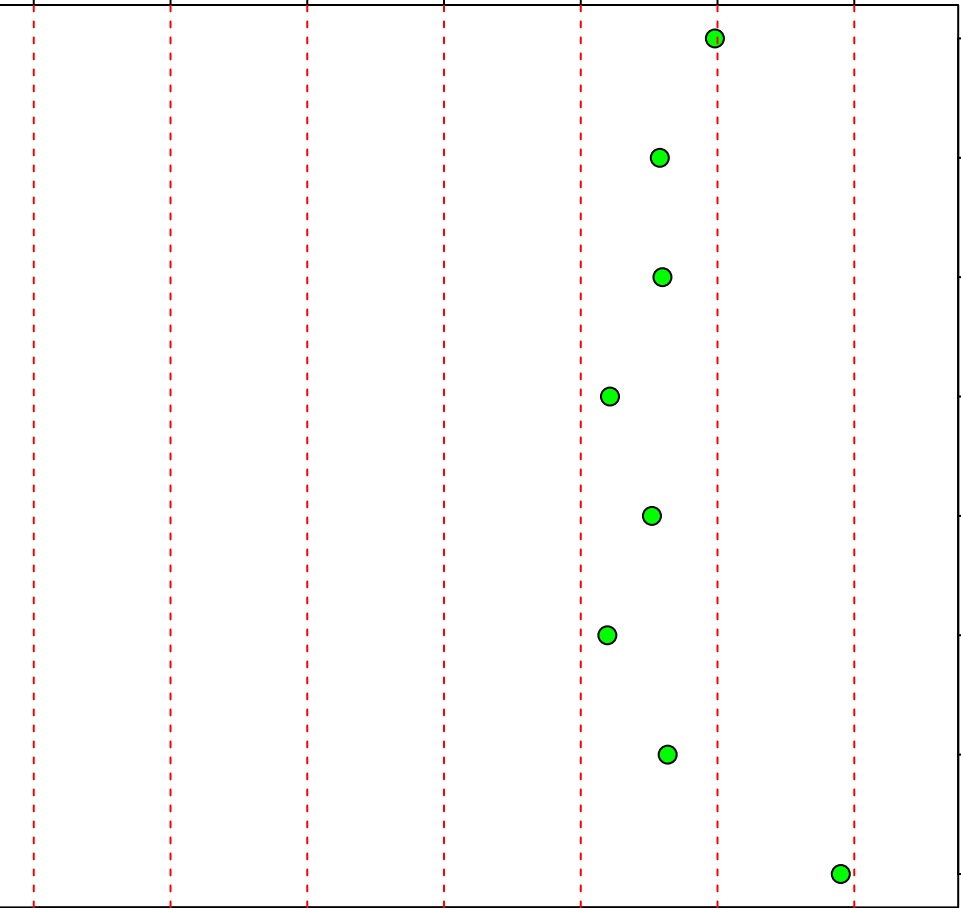

%diff 100\*(GBBS-TG43)/TG43

GBBS(solid model applicator, body, balloon & rectal contrast, packing contrast)

# Patient\_02 ICRU bladder

'phantom least similar to TG43'

D(Y, N, B, B)

D(Y, N, B, N)

D(Y, N, B, M)

D(N, N, N, N)

D(Y, N, N, N)

D(Y, N, M, M)

D(Y, M, X, X)

D(N, M, X, X)

'phantom most similar to TG43'



%diff 100\*(GBBS-TG43)/TG43

GBBS(solid model applicator, body, balloon & rectal contrast, packing contrast)

# Patient\_03 ICRU bladder

'phantom least similar to TG43'

D(Y, N, B, B)

D(Y, N, B, N)

D(Y, N, B, M)

D(N, N, N, N)

D(Y, N, N, N)

D(Y, N, M, M)

D(Y, M, X, X)

D(N, M, X, X)

'phantom most similar to TG43'

-10

-8

-6

-4

-2

0

2

%diff 100\*(GBBS-TG43)/TG43

GBBS(solid model applicator, body, balloon & rectal contrast, packing contrast)

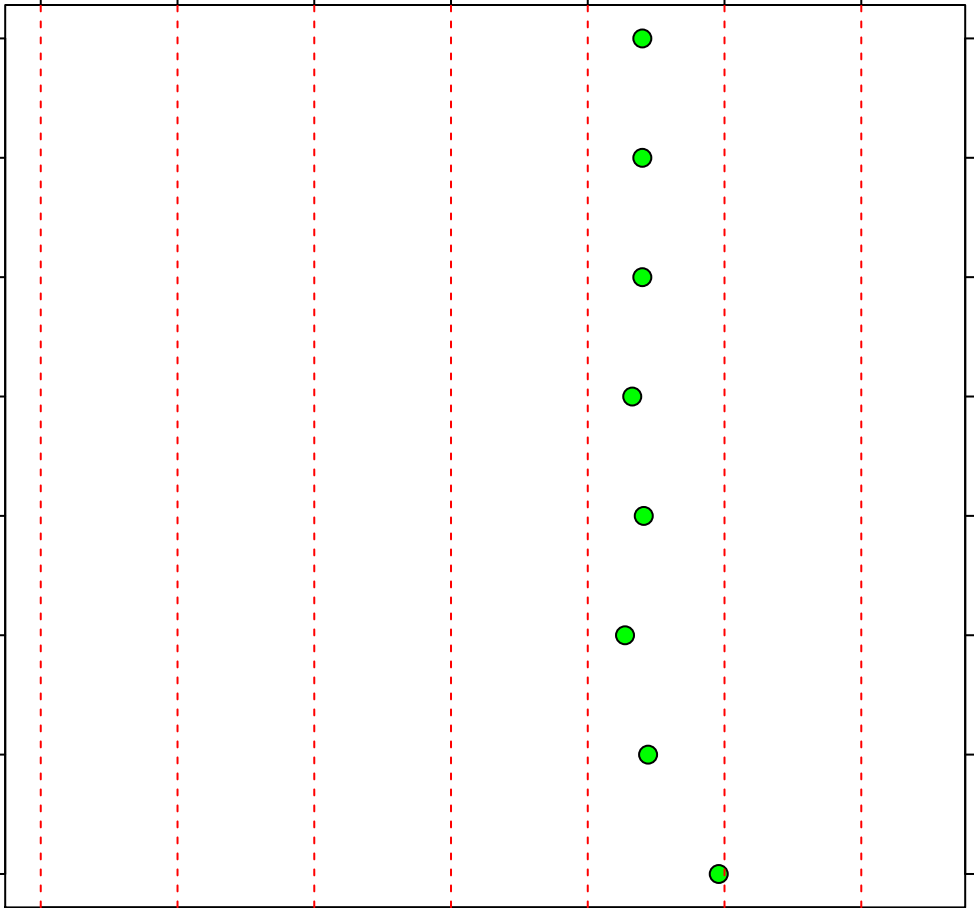

# Patient\_04 ICRU bladder

'phantom least similar to TG43'

D(Y, N, B, B)

D(Y, N, B, N)

D(Y, N, B, M)

D(N, N, N, N)

D(Y, N, N, N)

D(Y, N, M, M)

D(Y, M, X, X)

D(N, M, X, X)

'phantom most similar to TG43'

-10

-8

-6

-4

-2

0

2

%diff 100\*(GBBS-TG43)/TG43

GBBS(solid model applicator, body, balloon & rectal contrast, packing contrast)

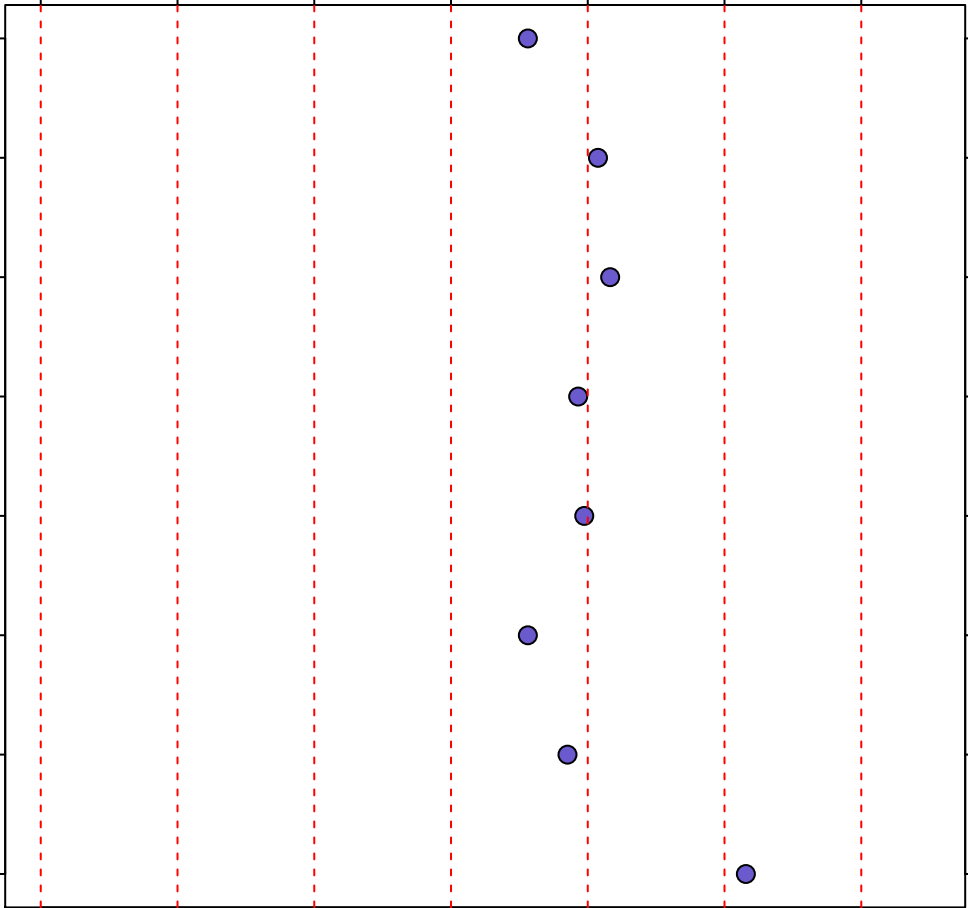

# Patient\_05 ICRU bladder

'phantom least similar to TG43'

D(Y, N, B, B)

D(Y, N, B, N)

D(Y, N, B, M)

D(N, N, N, N)

D(Y, N, N, N)

D(Y, N, M, M)

D(Y, M, X, X)

D(N, M, X, X)

'phantom most similar to TG43'

-10 -8 -6 -4 -2 0 2

%diff 100\*(GBBS-TG43)/TG43

GBBS(solid model applicator, body, balloon & rectal contrast, packing contrast)

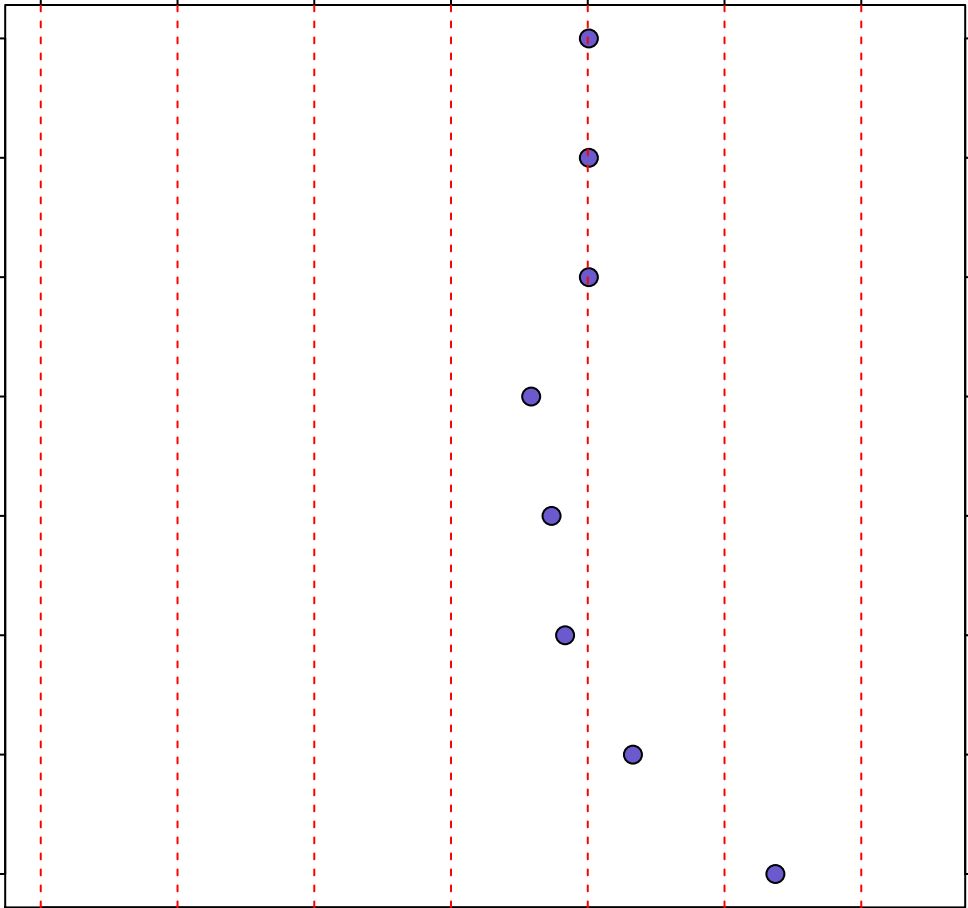

# Patient\_06 ICRU bladder

'phantom least similar to TG43'

D(Y, N, B, B)

D(Y, N, B, N)

D(Y, N, B, M)

D(N, N, N, N)

D(Y, N, N, N)

D(Y, N, M, M)

D(Y, M, X, X)

D(N, M, X, X)

'phantom most similar to TG43'

-10 -8 -6 -4 -2 0 2

%diff 100\*(GBBS-TG43)/TG43

GBBS(solid model applicator, body, balloon & rectal contrast, packing contrast)

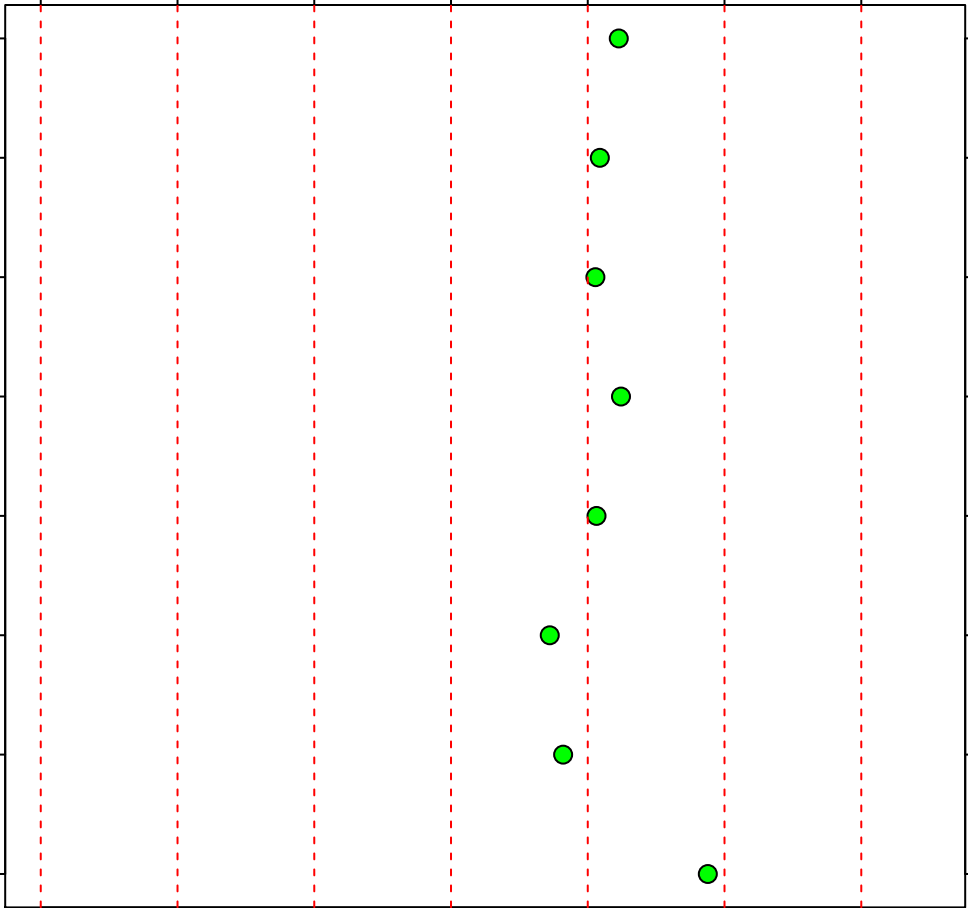

# Patient\_07 ICRU bladder

'phantom least similar to TG43'

- D(Y, N, B, B)
- D(Y, N, B, N)
- D(Y, N, B, M)
- D(N, N, N, N)
- D(Y, N, N, N)
- D(Y, N, M, M)
- D(Y, M, X, X)
- D(N, M, X, X)

'phantom most similar to TG43'

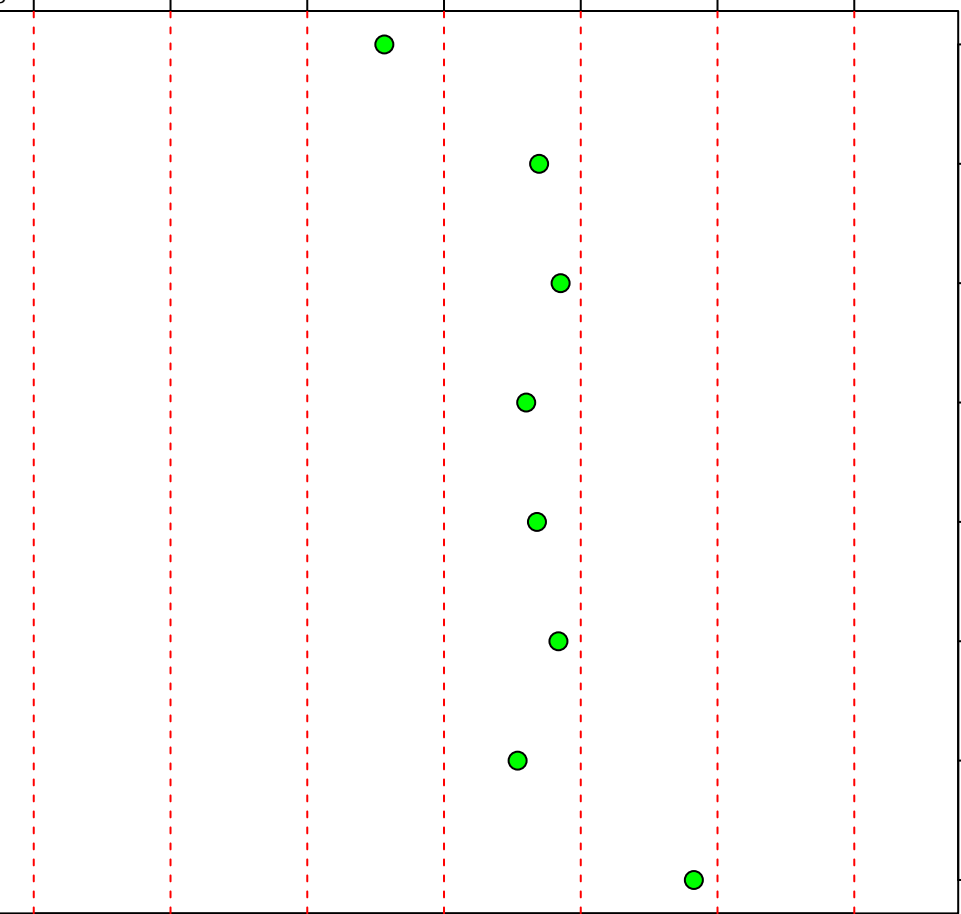

%diff 100\*(GBBS-TG43)/TG43

GBBS(solid model applicator, body, balloon & rectal contrast, packing contrast)



# Patient\_08 ICRU bladder

'phantom least similar to TG43'

D(Y, N, B, B)

D(Y, N, B, N)

D(Y, N, B, M)

D(N, N, N, N)

D(Y, N, N, N)

D(Y, N, M, M)

D(Y, M, X, X)

D(N, M, X, X)

'phantom most similar to TG43'

-10 -8 -6 -4 -2 0 2

%diff 100\*(GBBS-TG43)/TG43

GBBS(solid model applicator, body, balloon & rectal contrast, packing contrast)

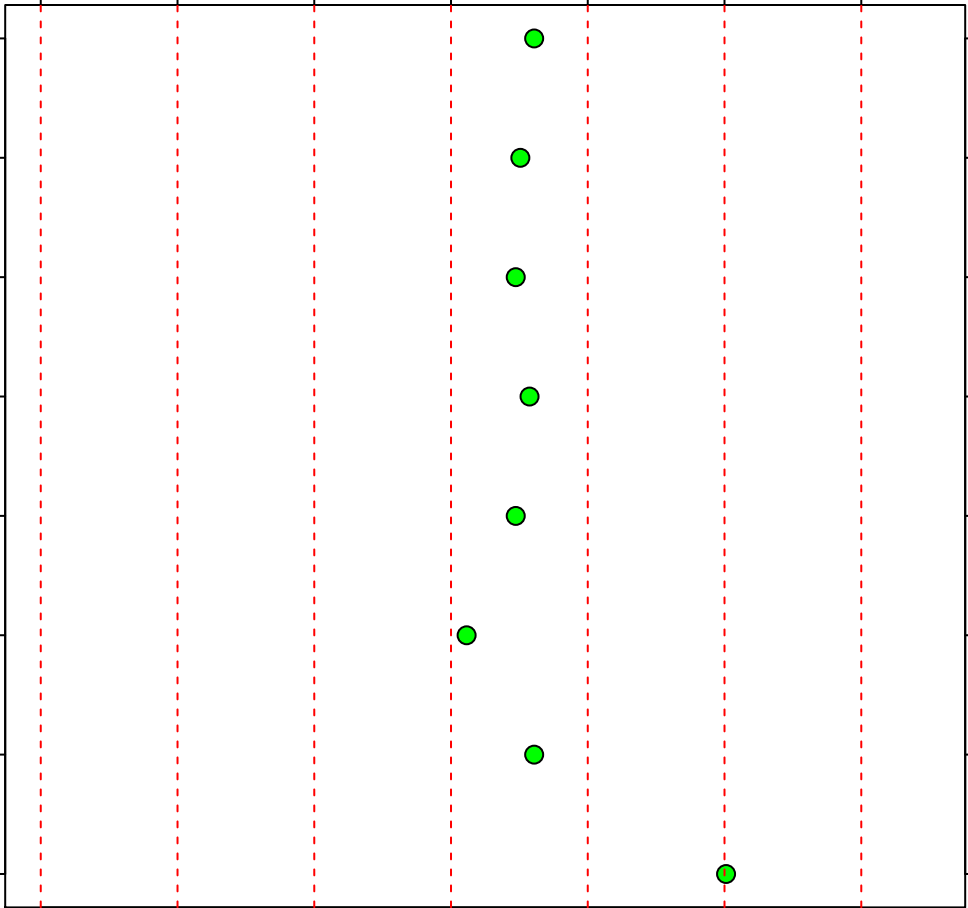

# Patient\_09 ICRU bladder

'phantom least similar to TG43'

D(Y, N, B, B)

D(Y, N, B, N)

D(Y, N, B, M)

D(N, N, N, N)

D(Y, N, N, N)

D(Y, N, M, M)

D(Y, M, X, X)

D(N, M, X, X)

'phantom most similar to TG43'

-10 -8 -6 -4 -2 0 2

%diff 100\*(GBBS-TG43)/TG43

GBBS(solid model applicator, body, balloon & rectal contrast, packing contrast)

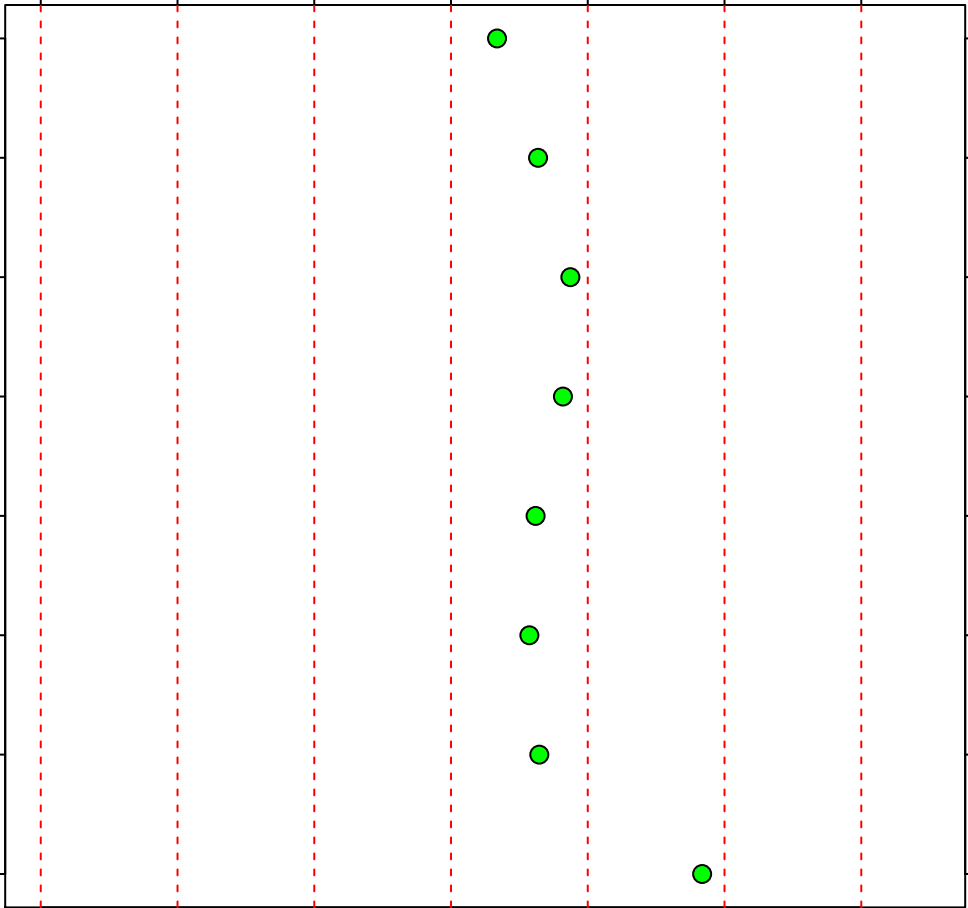

# Patient\_10 ICRU bladder

'phantom least similar to TG43'

D(Y, N, B, B)

D(Y, N, B, N)

D(Y, N, B, M)

D(N, N, N, N)

D(Y, N, N, N)

D(Y, N, M, M)

D(Y, M, X, X)

D(N, M, X, X)

'phantom most similar to TG43'



%diff 100\*(GBBS-TG43)/TG43

GBBS(solid model applicator, body, balloon & rectal contrast, packing contrast)

# Patient\_11 ICRU bladder

'phantom least similar to TG43'

D(Y, N, B, B)

D(Y, N, B, N)

D(Y, N, B, M)

D(N, N, N, N)

D(Y, N, N, N)

D(Y, N, M, M)

D(Y, M, X, X)

D(N, M, X, X)

'phantom most similar to TG43'

-10 -8 -6 -4 -2 0 2

%diff 100\*(GBBS-TG43)/TG43

GBBS(solid model applicator, body, balloon & rectal contrast, packing contrast)

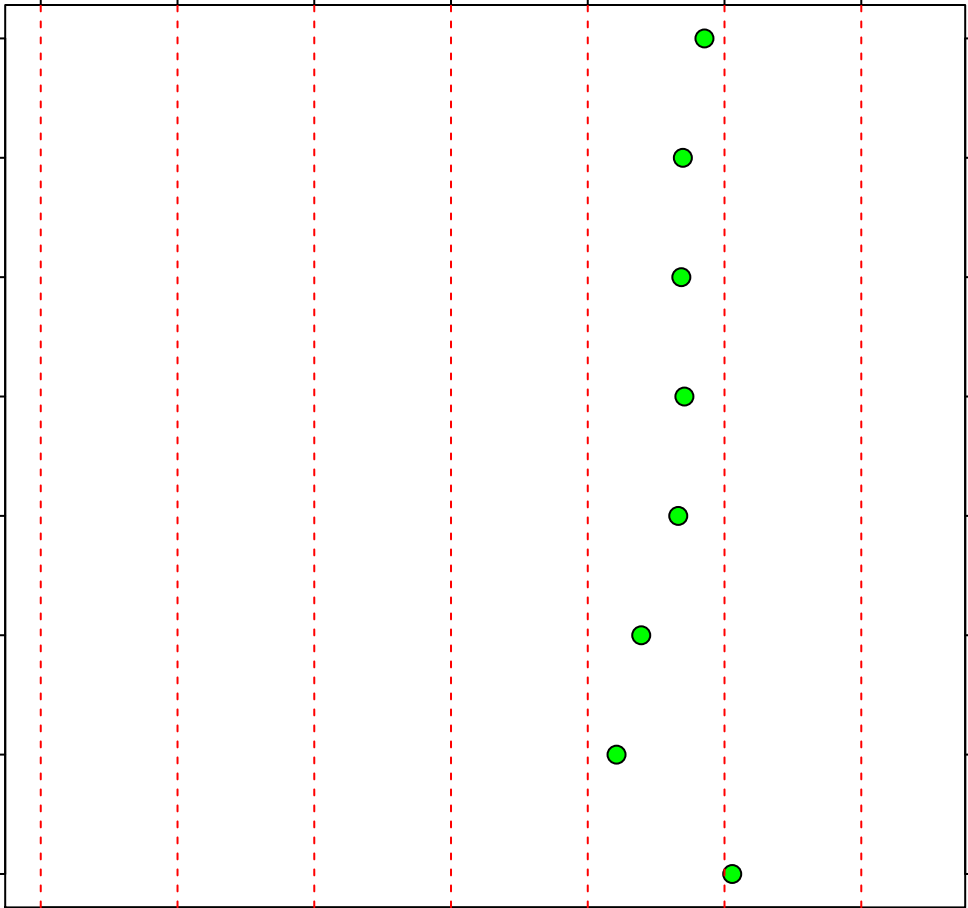

# Patient\_12 ICRU bladder

'phantom least similar to TG43'

- D(Y, N, B, B)
- D(Y, N, B, N)
- D(Y, N, B, M)
- D(N, N, N, N)
- D(Y, N, N, N)
- D(Y, N, M, M)
- D(Y, M, X, X)
- D(N, M, X, X)

'phantom most similar to TG43'

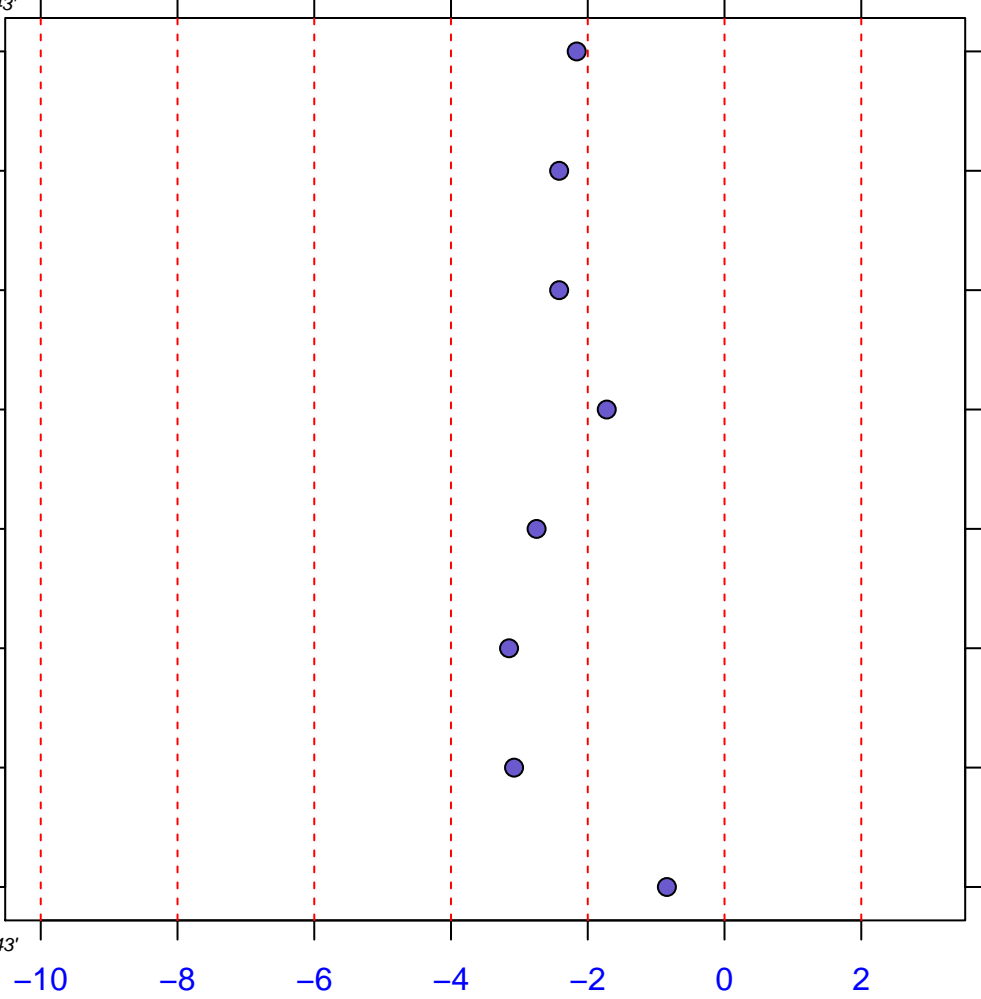

%diff 100\*(GBBS-TG43)/TG43

GBBS(solid model applicator, body, balloon & rectal contrast, packing contrast)

# Patient\_13 ICRU bladder

'phantom least similar to TG43'

D(Y, N, B, B)

D(Y, N, B, N)

D(Y, N, B, M)

D(N, N, N, N)

D(Y, N, N, N)

D(Y, N, M, M)

D(Y, M, X, X)

D(N, M, X, X)

'phantom most similar to TG43'

-10

-8

-6

-4

-2

0

2

%diff 100\*(GBBS-TG43)/TG43

GBBS(solid model applicator, body, balloon & rectal contrast, packing contrast)

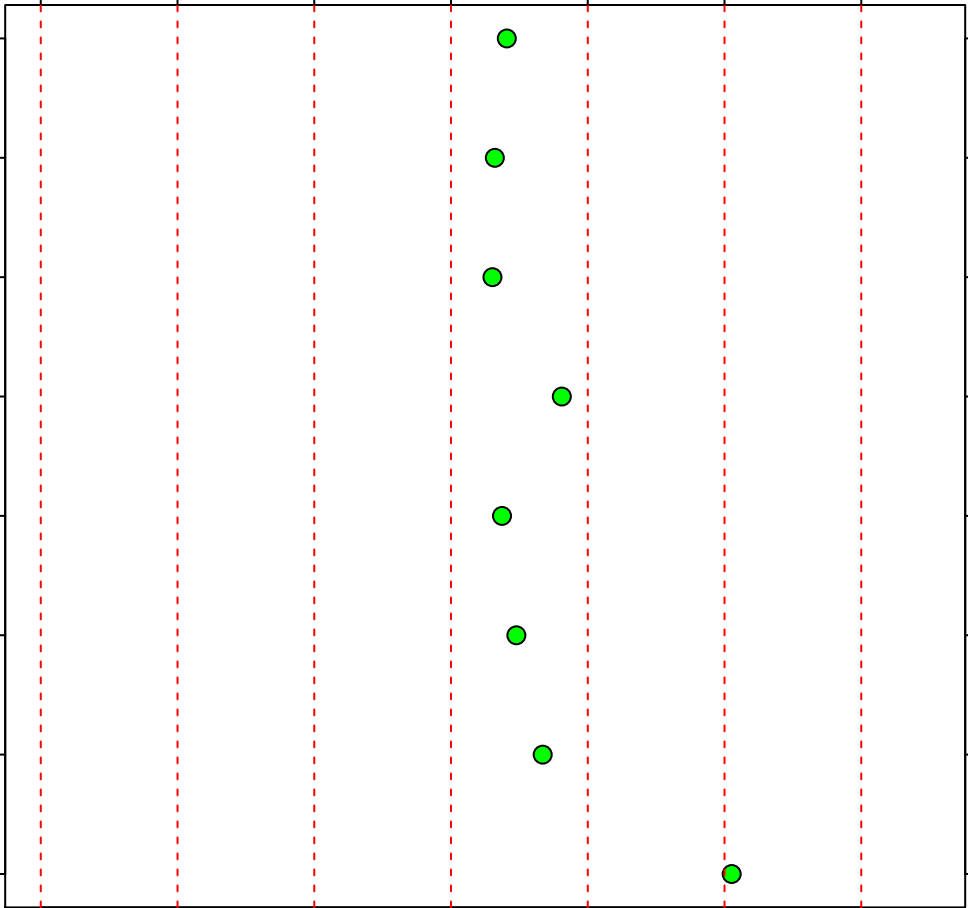

# Patient\_14 ICRU bladder

'phantom least similar to TG43'

- D(Y, N, B, B)
- D(Y, N, B, N)
- D(Y, N, B, M)
- D(N, N, N, N)
- D(Y, N, N, N)
- D(Y, N, M, M)
- D(Y, M, X, X)
- D(N, M, X, X)

'phantom most similar to TG43'

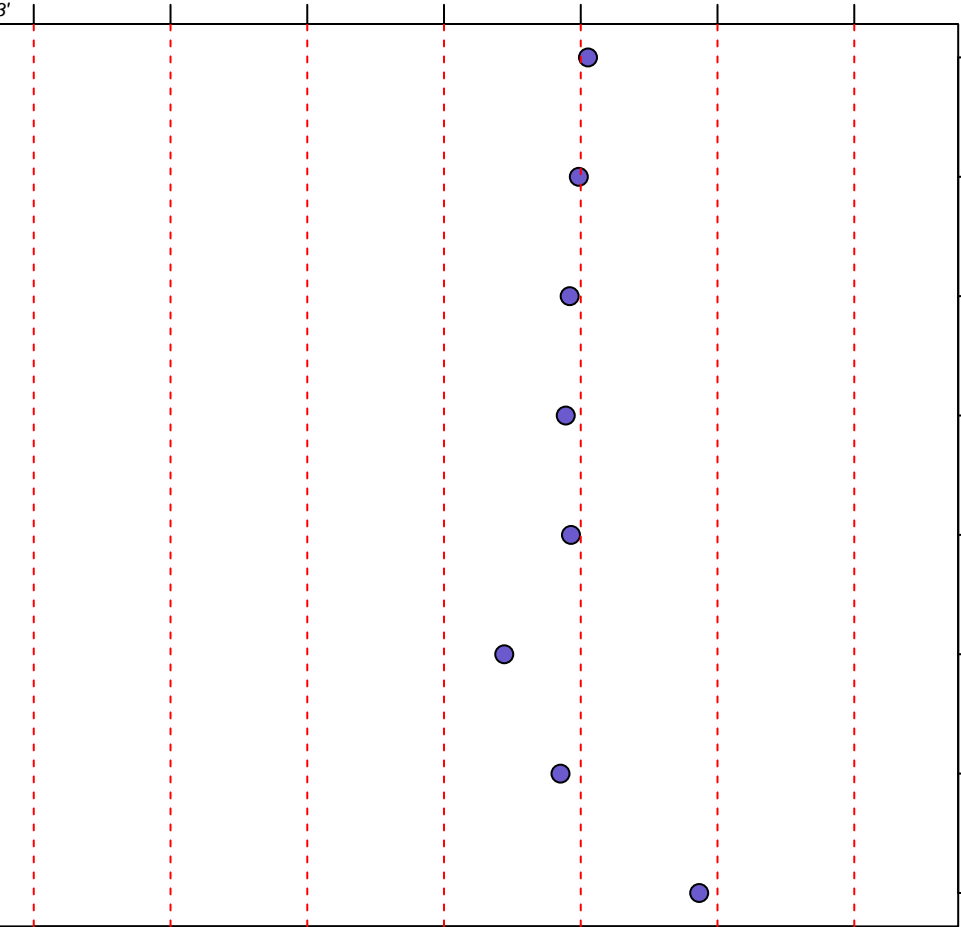

-10 -8 -6 -4 -2 0 2

%diff 100\*(GBBS-TG43)/TG43

GBBS(solid model applicator, body, balloon & rectal contrast, packing contrast)

# Patient\_15 ICRU bladder

'phantom least similar to TG43'

- D(Y, N, B, B)
- D(Y, N, B, N)
- D(Y, N, B, M)
- D(N, N, N, N)
- D(Y, N, N, N)
- D(Y, N, M, M)
- D(Y, M, X, X)
- D(N, M, X, X)

'phantom most similar to TG43'

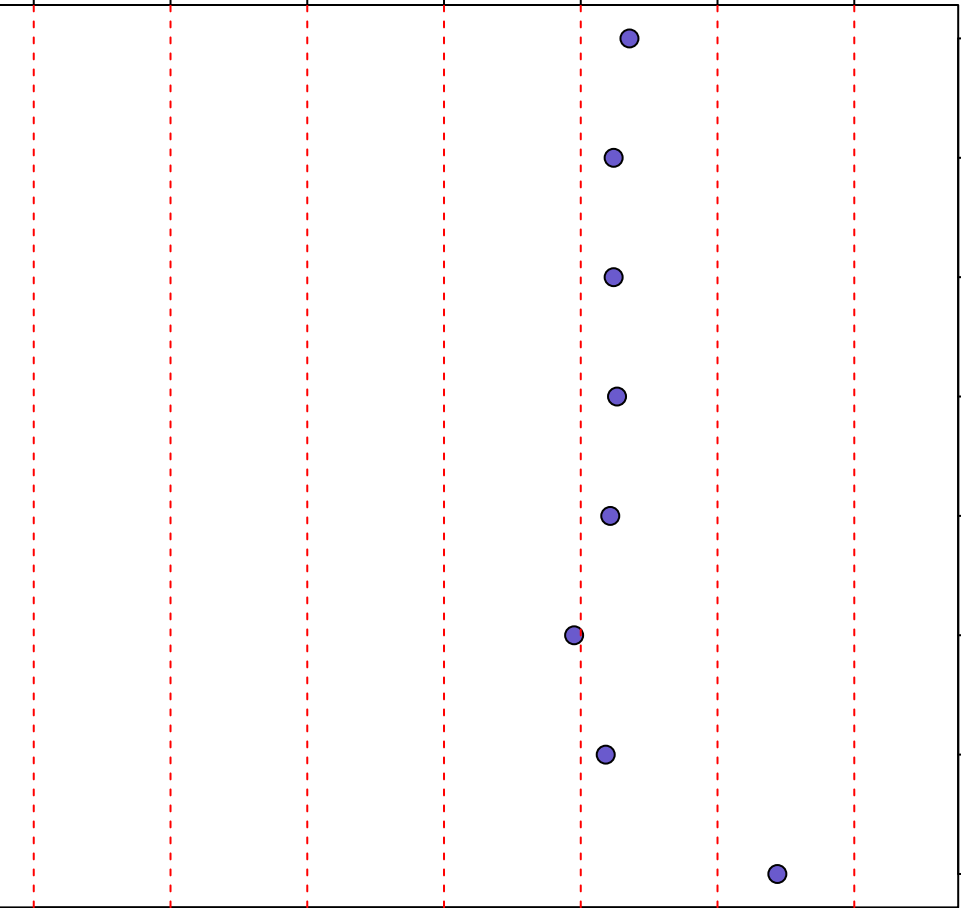

%diff 100\*(GBBS-TG43)/TG43

GBBS(solid model applicator, body, balloon & rectal contrast, packing contrast)



# Patient\_16 ICRU bladder

'phantom least similar to TG43'

D(Y, N, B, B)

D(Y, N, B, N)

D(Y, N, B, M)

D(N, N, N, N)

D(Y, N, N, N)

D(Y, N, M, M)

D(Y, M, X, X)

D(N, M, X, X)

'phantom most similar to TG43'

-10 -8 -6 -4 -2 0 2

%diff 100\*(GBBS-TG43)/TG43

GBBS(solid model applicator, body, balloon & rectal contrast, packing contrast)

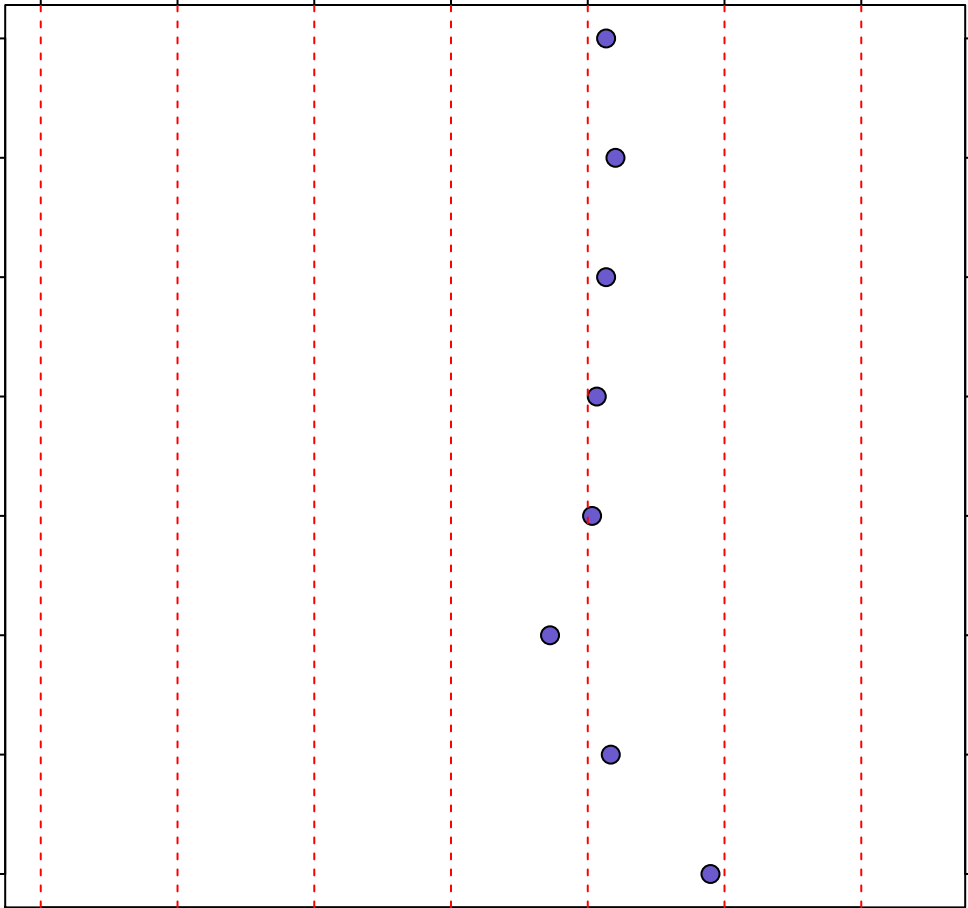

# Patient\_17 ICRU bladder

'phantom least similar to TG43'

D(Y, N, B, B)

D(Y, N, B, N)

D(Y, N, B, M)

D(N, N, N, N)

D(Y, N, N, N)

D(Y, N, M, M)

D(Y, M, X, X)

D(N, M, X, X)

'phantom most similar to TG43'



%diff 100\*(GBBS-TG43)/TG43

GBBS(solid model applicator, body, balloon & rectal contrast, packing contrast)

# Patient\_18 ICRU bladder

'phantom least similar to TG43'

- D(Y, N, B, B)
- D(Y, N, B, N)
- D(Y, N, B, M)
- D(N, N, N, N)
- D(Y, N, N, N)
- D(Y, N, M, M)
- D(Y, M, X, X)
- D(N, M, X, X)

'phantom most similar to TG43'

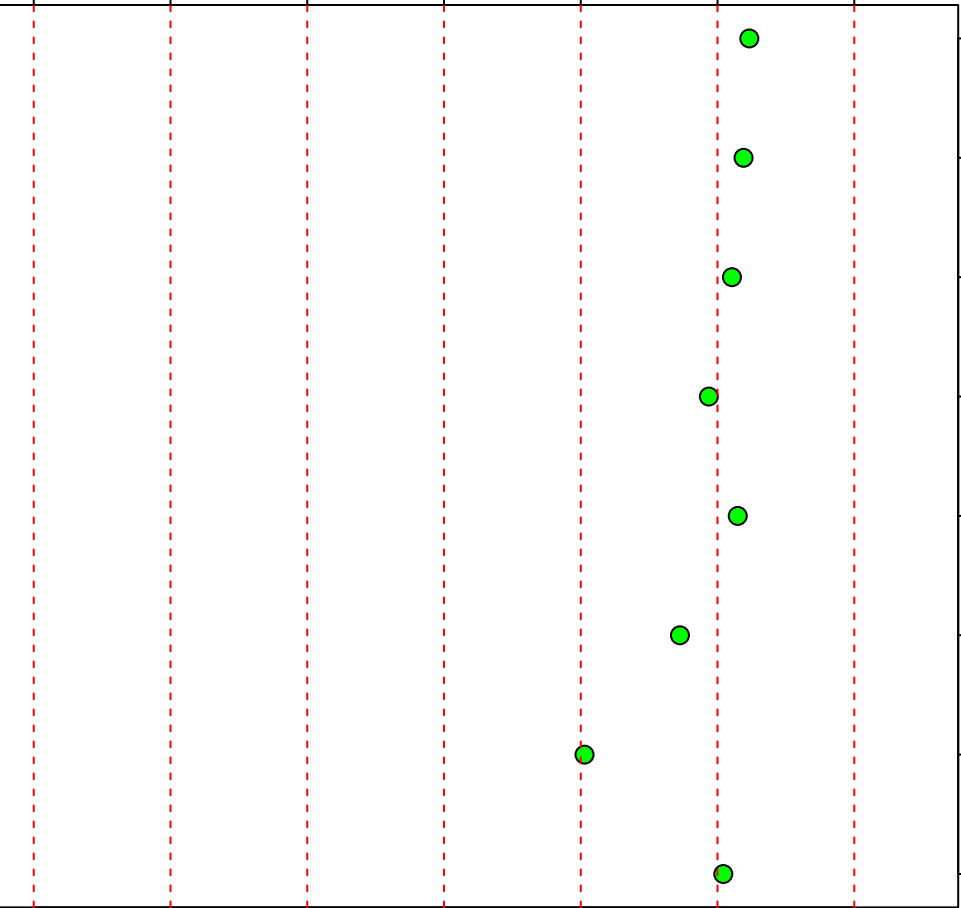

%diff 100\*(GBBS-TG43)/TG43

GBBS(solid model applicator, body, balloon & rectal contrast, packing contrast)

# Patient\_19 ICRU bladder

'phantom least similar to TG43'

- D(Y, N, B, B)
- D(Y, N, B, N)
- D(Y, N, B, M)
- D(N, N, N, N)
- D(Y, N, N, N)
- D(Y, N, M, M)
- D(Y, M, X, X)
- D(N, M, X, X)

'phantom most similar to TG43'

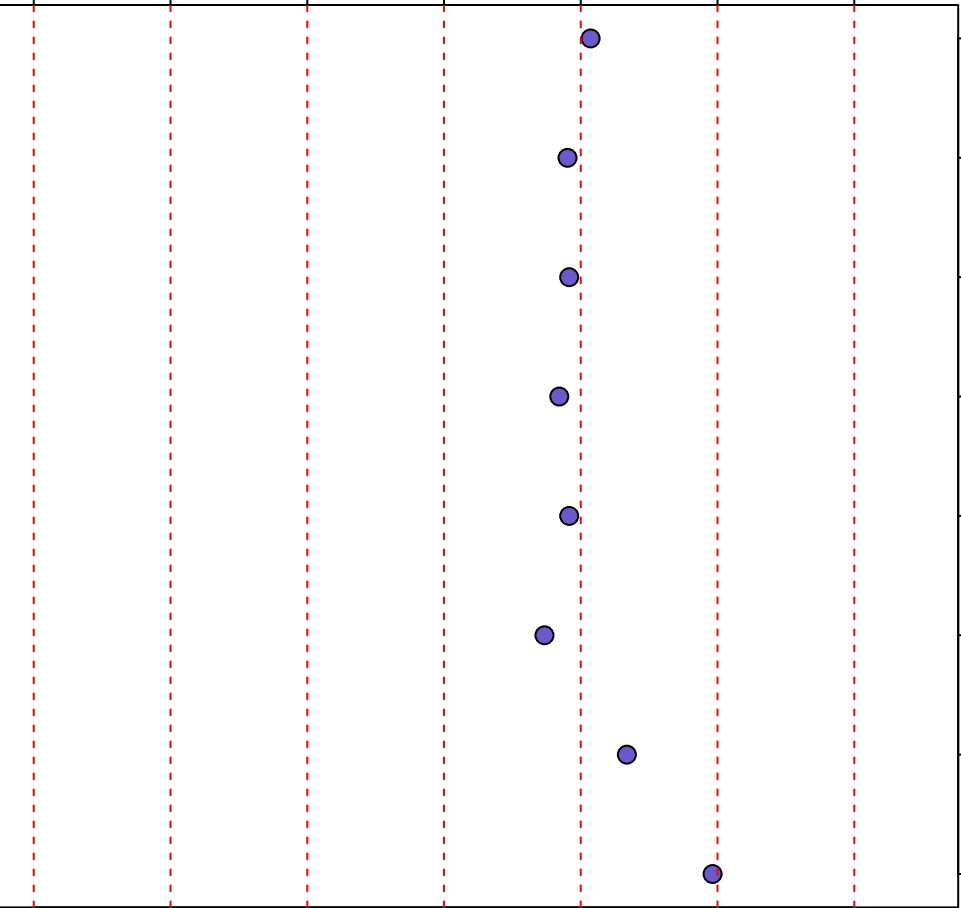

%diff 100\*(GBBS-TG43)/TG43

GBBS(solid model applicator, body, balloon & rectal contrast, packing contrast)

# Patient\_20 ICRU bladder

'phantom least similar to TG43'

D(Y, N, B, B)

D(Y, N, B, N)

D(Y, N, B, M)

D(N, N, N, N)

D(Y, N, N, N)

D(Y, N, M, M)

D(Y, M, X, X)

D(N, M, X, X)

'phantom most similar to TG43'

-10 -8 -6 -4 -2 0 2

%diff 100\*(GBBS-TG43)/TG43

GBBS(solid model applicator, body, balloon & rectal contrast, packing contrast)

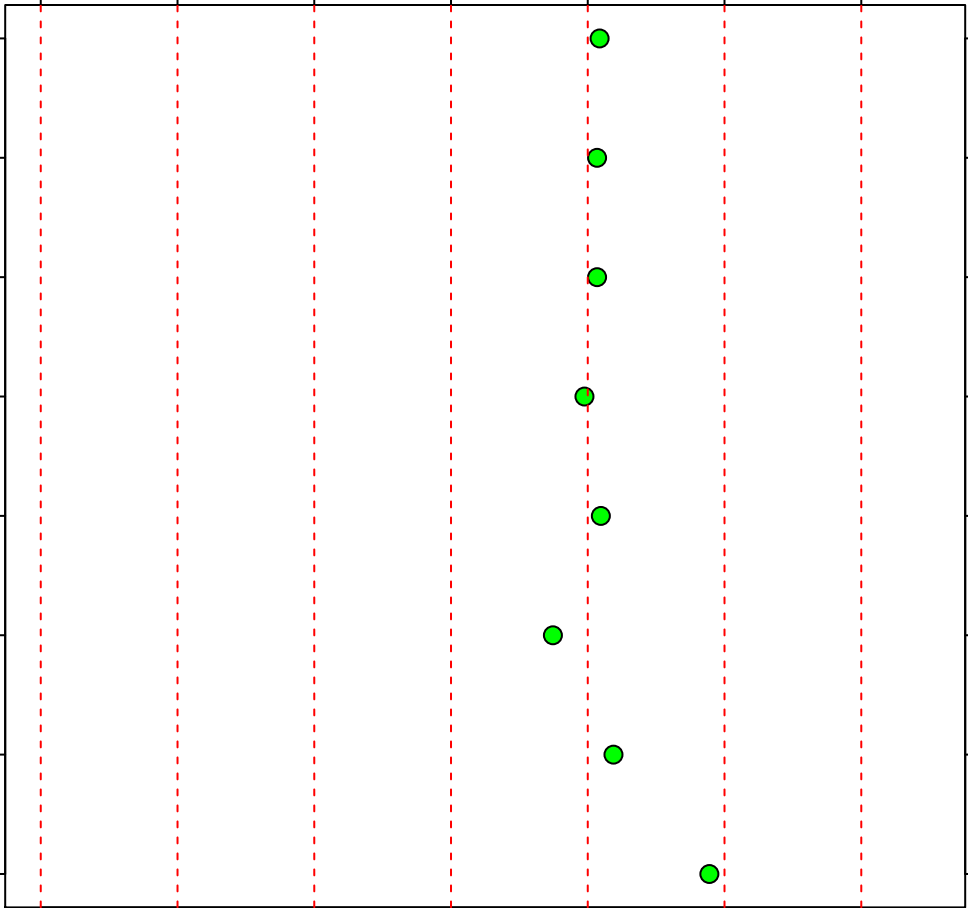

# Patient\_21 ICRU bladder

'phantom least similar to TG43'

D(Y, N, B, B)

D(Y, N, B, N)

D(Y, N, B, M)

D(N, N, N, N)

D(Y, N, N, N)

D(Y, N, M, M)

D(Y, M, X, X)

D(N, M, X, X)

'phantom most similar to TG43'

-10 -8 -6 -4 -2 0 2

%diff 100\*(GBBS-TG43)/TG43

GBBS(solid model applicator, body, balloon & rectal contrast, packing contrast)

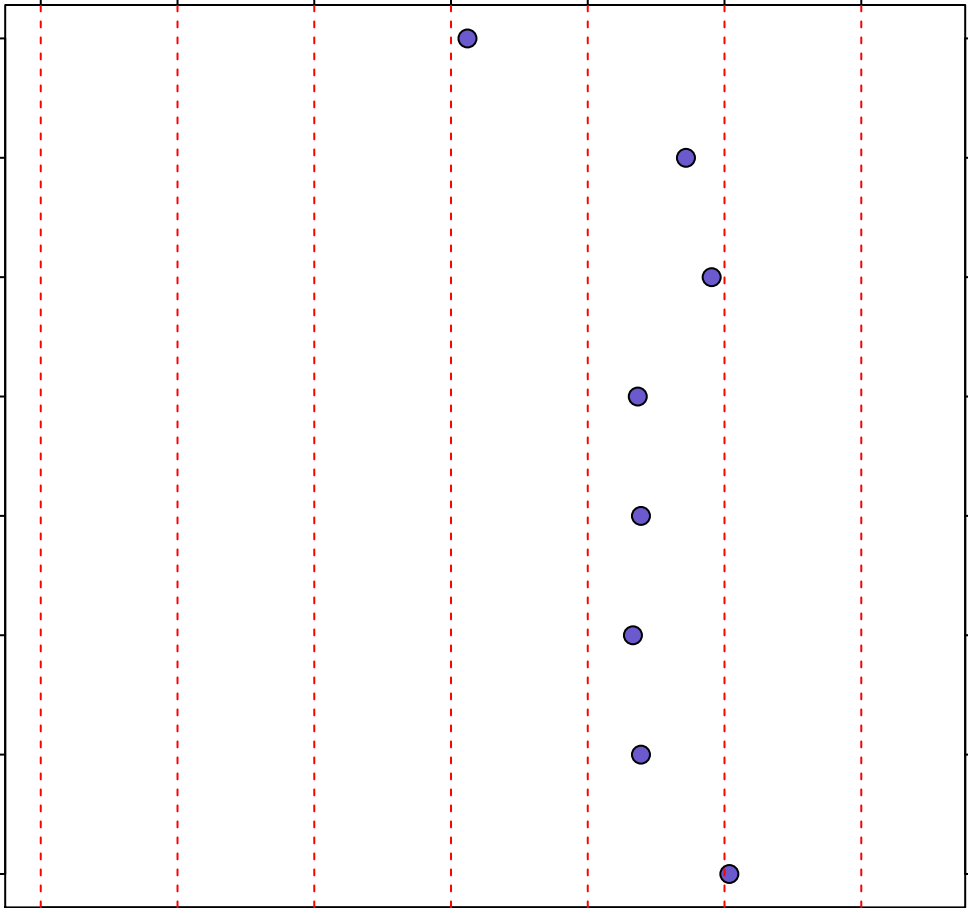

# Patient\_22 ICRU bladder

'phantom least similar to TG43'

D(Y, N, B, B)

D(Y, N, B, N)

D(Y, N, B, M)

D(N, N, N, N)

D(Y, N, N, N)

D(Y, N, M, M)

D(Y, M, X, X)

D(N, M, X, X)

'phantom most similar to TG43'

-10 -8 -6 -4 -2 0 2

%diff 100\*(GBBS-TG43)/TG43

GBBS(solid model applicator, body, balloon & rectal contrast, packing contrast)

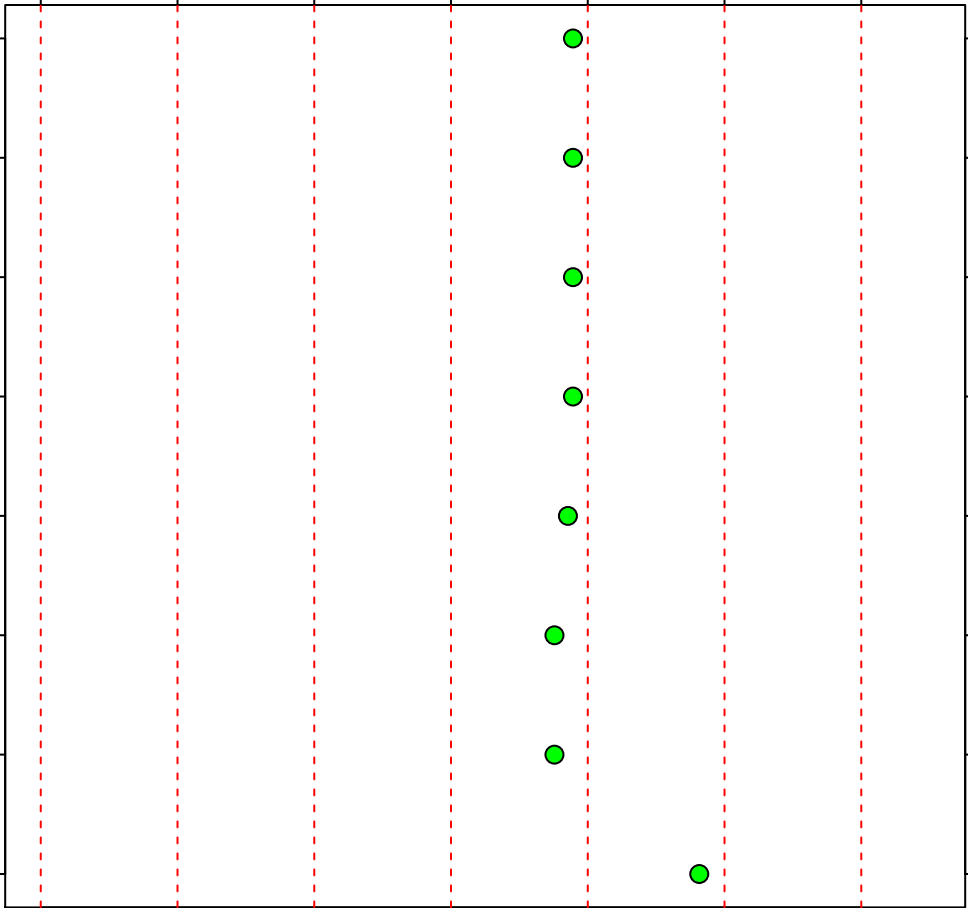

# Patient\_23 ICRU bladder

'phantom least similar to TG43'

- D(Y, N, B, B)
- D(Y, N, B, N)
- D(Y, N, B, M)
- D(N, N, N, N)
- D(Y, N, N, N)
- D(Y, N, M, M)
- D(Y, M, X, X)
- D(N, M, X, X)

'phantom most similar to TG43'

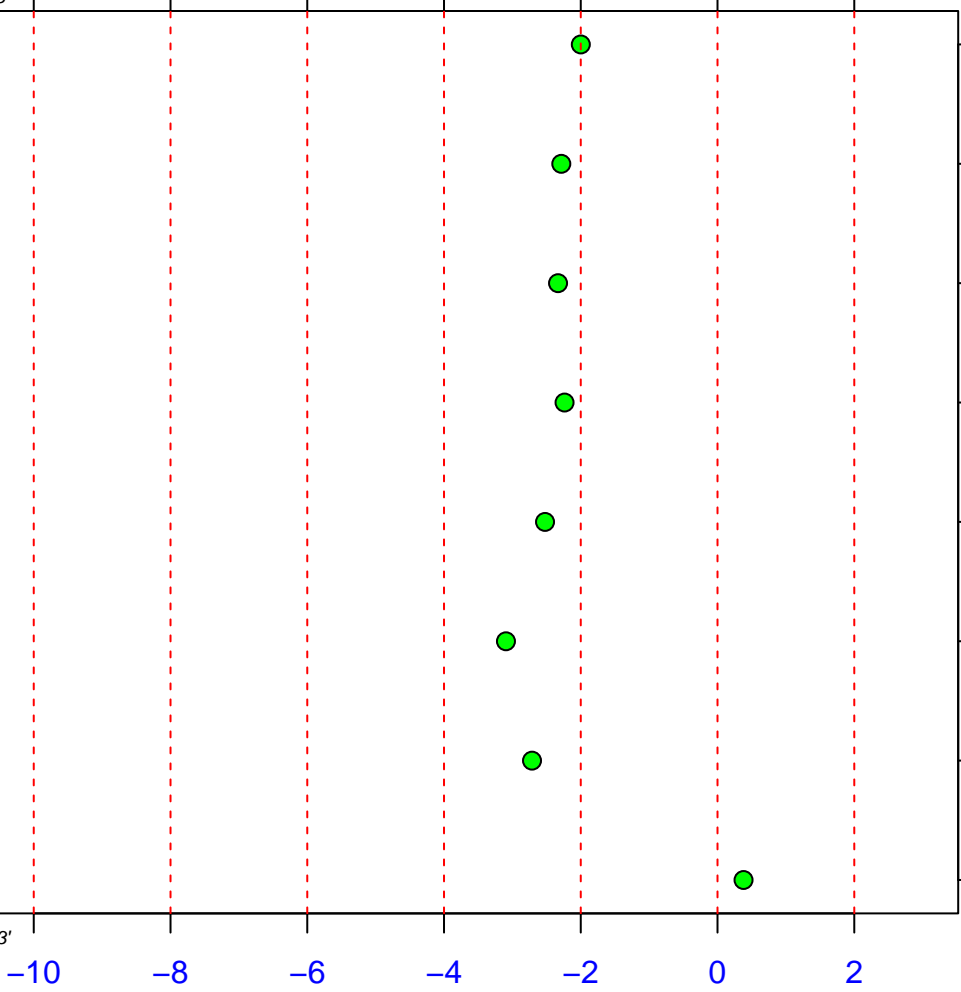

%diff 100\*(GBBS-TG43)/TG43

GBBS(solid model applicator, body, balloon & rectal contrast, packing contrast)



# Patient\_24 ICRU bladder

'phantom least similar to TG43'

D(Y, N, B, B)

D(Y, N, B, N)

D(Y, N, B, M)

D(N, N, N, N)

D(Y, N, N, N)

D(Y, N, M, M)

D(Y, M, X, X)

D(N, M, X, X)

'phantom most similar to TG43'

-10 -8 -6 -4 -2 0 2

%diff 100\*(GBBS-TG43)/TG43

GBBS(solid model applicator, body, balloon & rectal contrast, packing contrast)

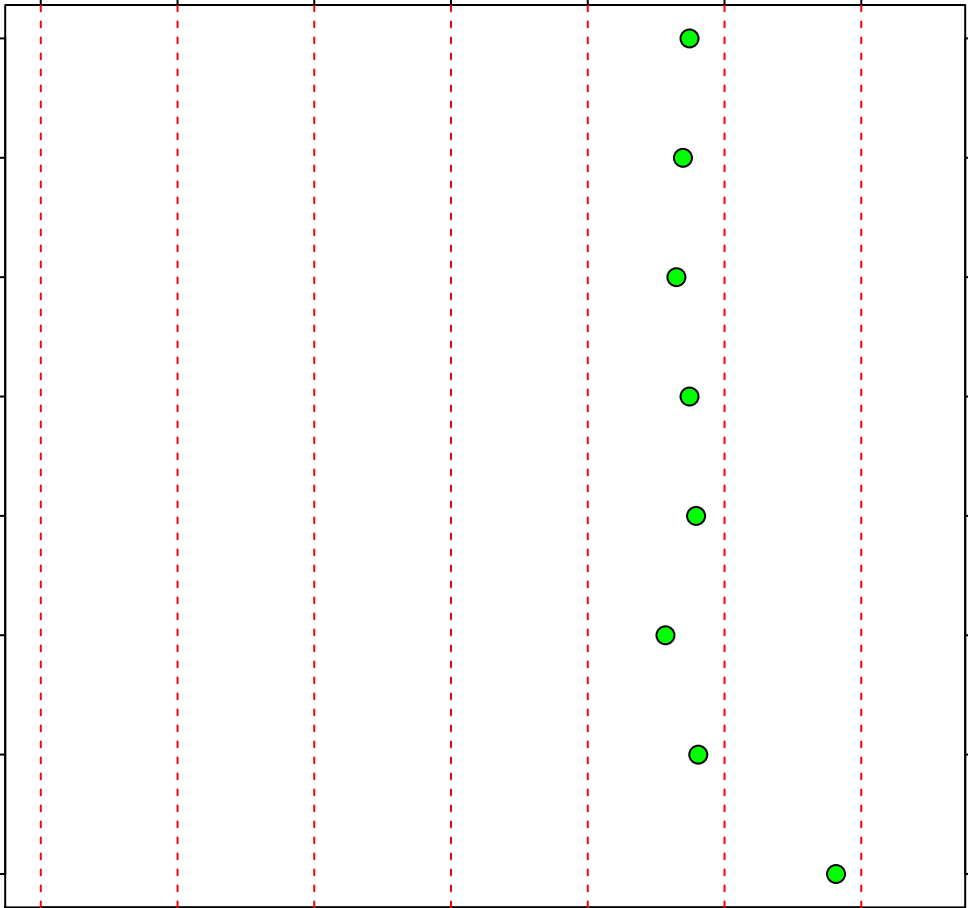

# Patient\_25 ICRU bladder

'phantom least similar to TG43'

D(Y, N, B, B)

D(Y, N, B, N)

D(Y, N, B, M)

D(N, N, N, N)

D(Y, N, N, N)

D(Y, N, M, M)

D(Y, M, X, X)

D(N, M, X, X)

'phantom most similar to TG43'

-10 -8 -6 -4 -2 0 2

%diff 100\*(GBBS-TG43)/TG43

GBBS(solid model applicator, body, balloon & rectal contrast, packing contrast)

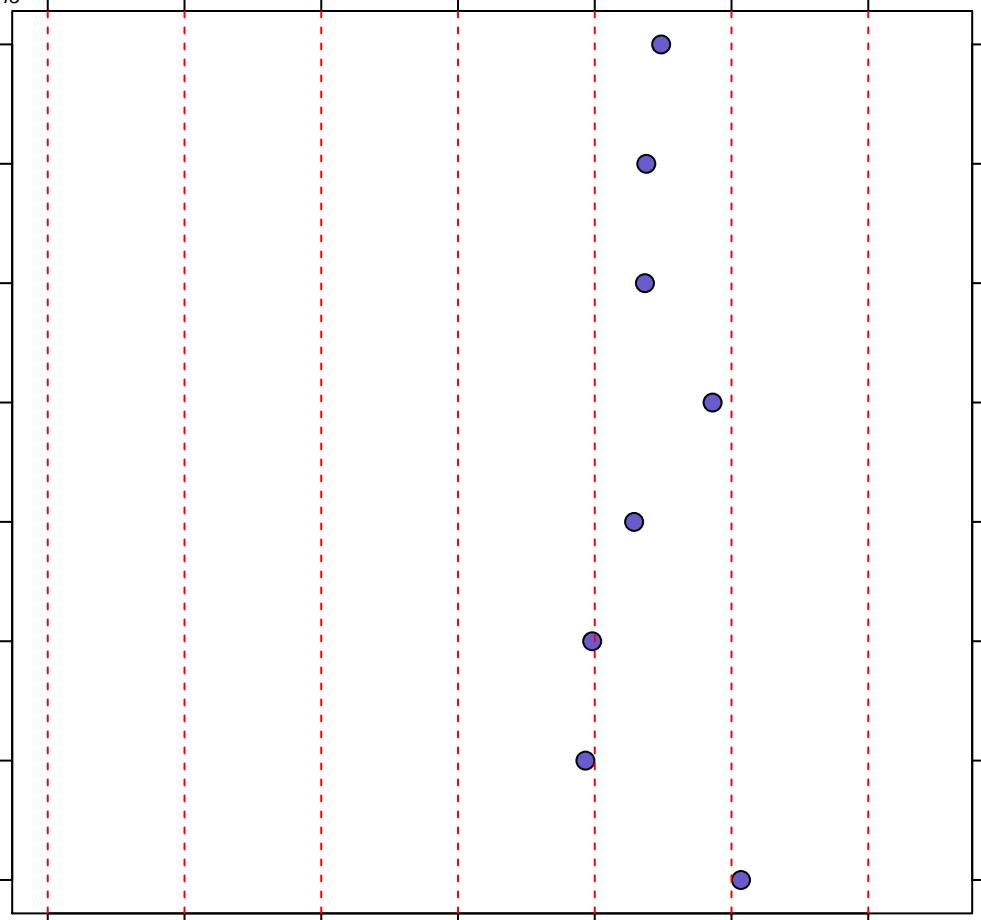

# Patient\_26 ICRU bladder

'phantom least similar to TG43'

D(Y, N, B, B)

D(Y, N, B, N)

D(Y, N, B, M)

D(N, N, N, N)

D(Y, N, N, N)

D(Y, N, M, M)

D(Y, M, X, X)

D(N, M, X, X)

'phantom most similar to TG43'

-10 -8 -6 -4 -2 0 2

%diff 100\*(GBBS-TG43)/TG43

GBBS(solid model applicator, body, balloon & rectal contrast, packing contrast)

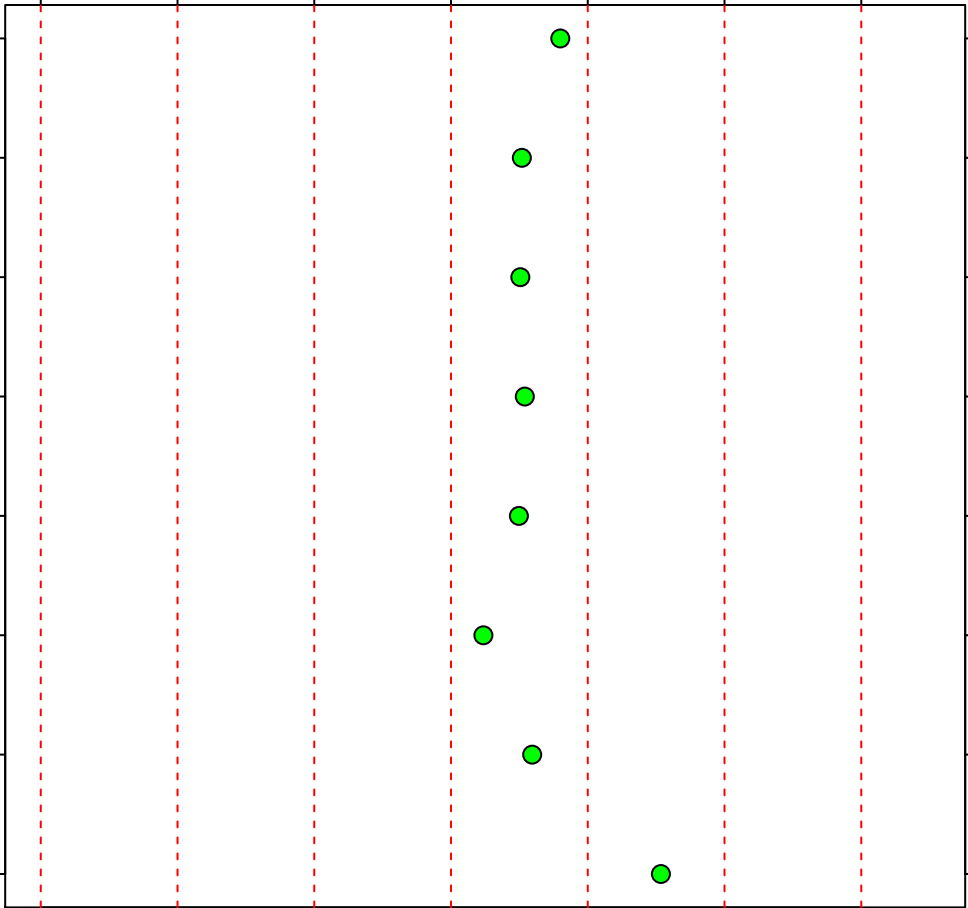

# Patient\_01 ICRU rectum

'phantom least similar to TG43'

- D(Y, N, B, B)
- D(Y, N, B, N)
- D(Y, N, B, M)
- D(N, N, N, N)
- D(Y, N, N, N)
- D(Y, N, M, M)
- D(Y, M, X, X)
- D(N, M, X, X)

'phantom most similar to TG43'

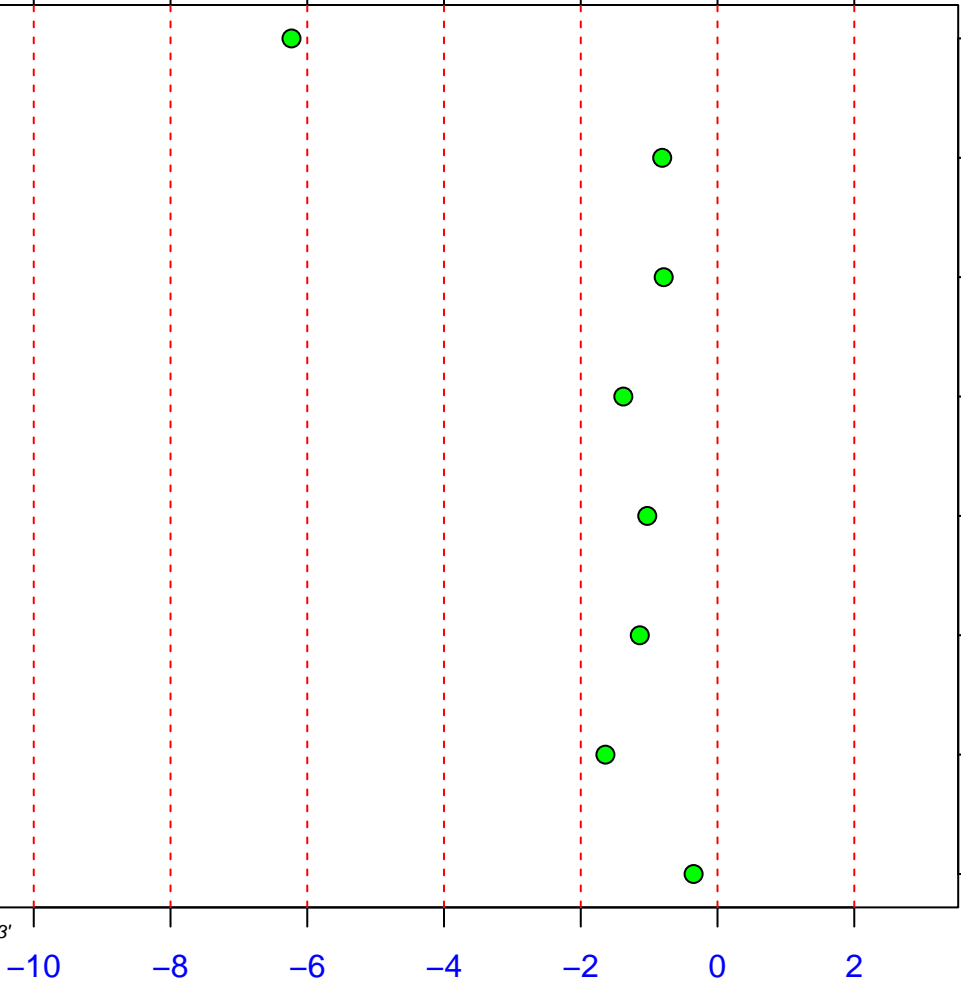

$$\%diff\ 100*(GBBS-TG43)/TG43$$

GBBS(solid model applicator, body, balloon & rectal contrast, packing contrast)

# Patient\_02 ICRU rectum

'phantom least similar to TG43'

D(Y, N, B, B)

D(Y, N, B, N)

D(Y, N, B, M)

D(N, N, N, N)

D(Y, N, N, N)

D(Y, N, M, M)

D(Y, M, X, X)

D(N, M, X, X)

'phantom most similar to TG43'

-10

-8

-6

-4

-2

0

2

%diff 100\*(GBBS-TG43)/TG43

GBBS(solid model applicator, body, balloon & rectal contrast, packing contrast)

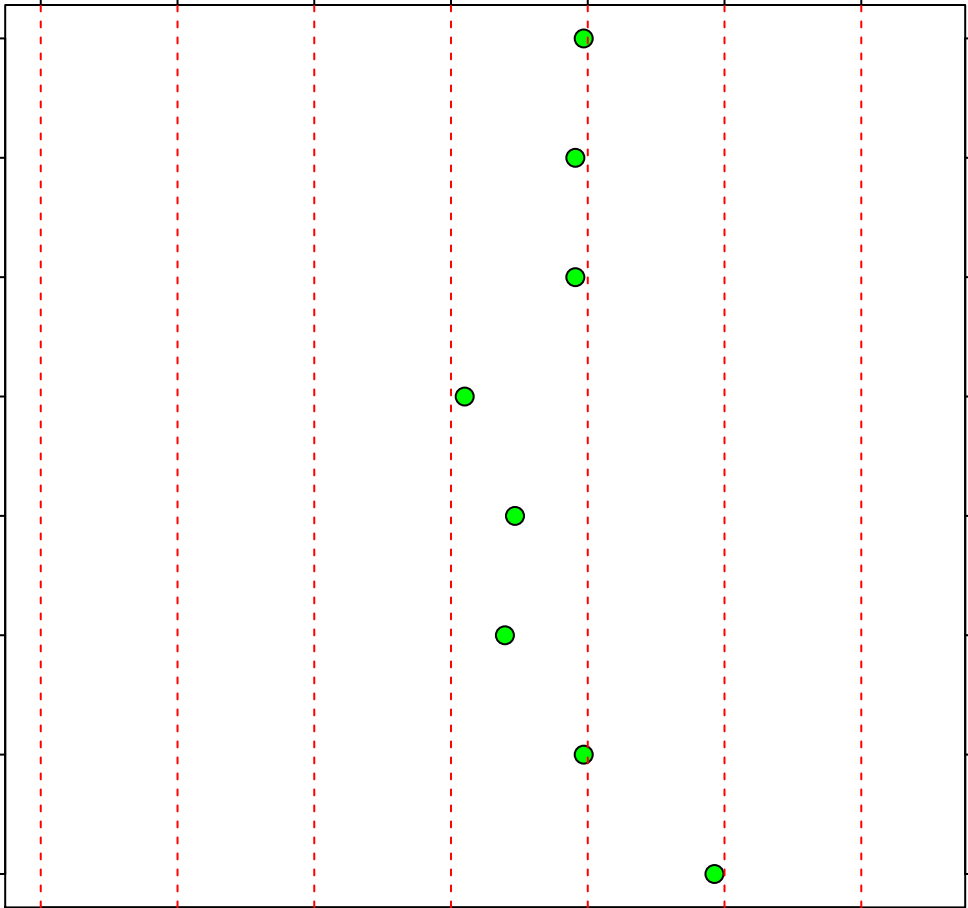

# Patient\_03 ICRU rectum

'phantom least similar to TG43'

D(Y, N, B, B)

D(Y, N, B, N)

D(Y, N, B, M)

D(N, N, N, N)

D(Y, N, N, N)

D(Y, N, M, M)

D(Y, M, X, X)

D(N, M, X, X)

'phantom most similar to TG43'



%diff 100\*(GBBS-TG43)/TG43

GBBS(solid model applicator, body, balloon & rectal contrast, packing contrast)

# Patient\_04 ICRU rectum

'phantom least similar to TG43'

D(Y, N, B, B)

D(Y, N, B, N)

D(Y, N, B, M)

D(N, N, N, N)

D(Y, N, N, N)

D(Y, N, M, M)

D(Y, M, X, X)

D(N, M, X, X)

'phantom most similar to TG43'

-10 -8 -6 -4 -2 0 2

%diff 100\*(GBBS-TG43)/TG43

GBBS(solid model applicator, body, balloon & rectal contrast, packing contrast)

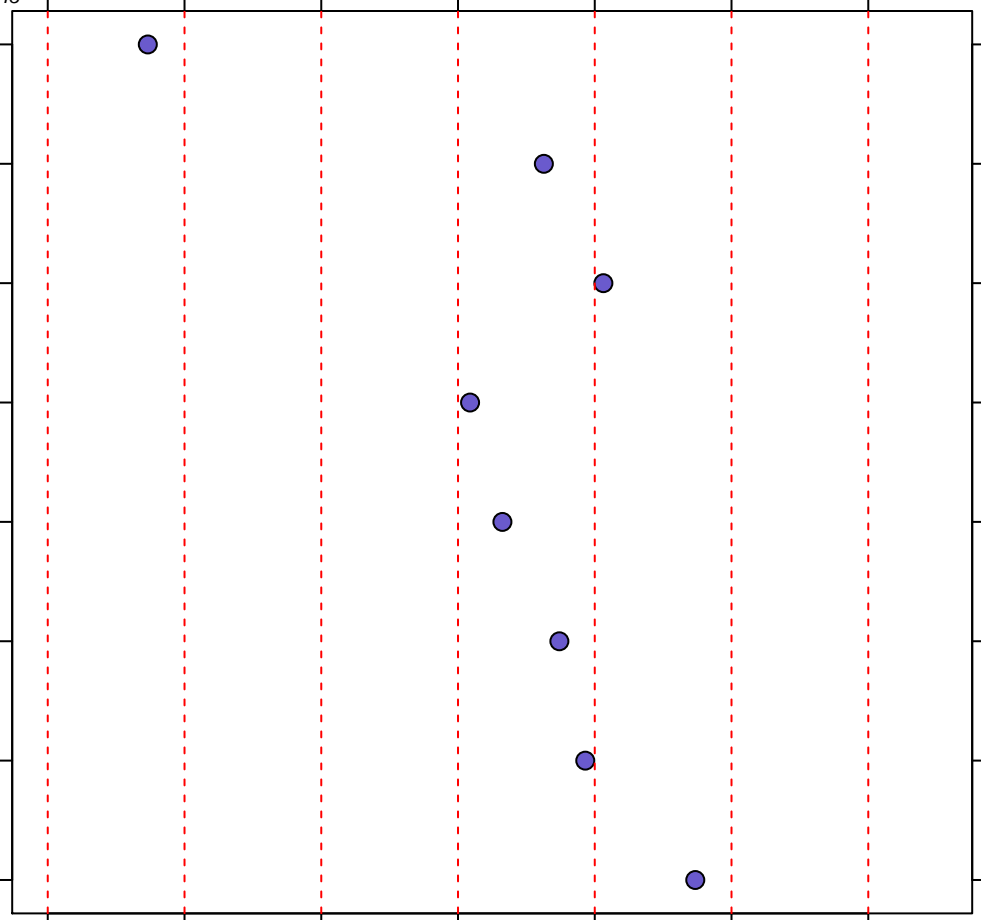

# Patient\_05 ICRU rectum

'phantom least similar to TG43'

- D(Y, N, B, B)
- D(Y, N, B, N)
- D(Y, N, B, M)
- D(N, N, N, N)
- D(Y, N, N, N)
- D(Y, N, M, M)
- D(Y, M, X, X)
- D(N, M, X, X)

'phantom most similar to TG43'

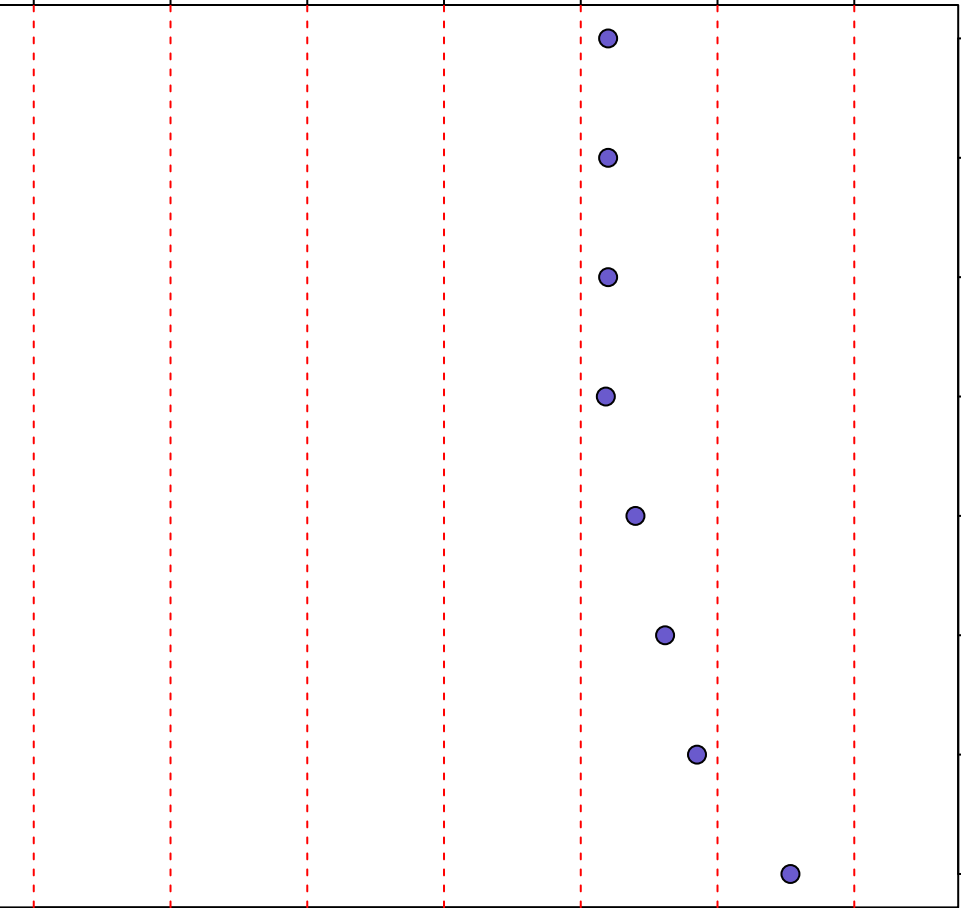

%diff 100\*(GBBS-TG43)/TG43

GBBS(solid model applicator, body, balloon & rectal contrast, packing contrast)



# Patient\_06 ICRU rectum

'phantom least similar to TG43'

- D(Y, N, B, B)
- D(Y, N, B, N)
- D(Y, N, B, M)
- D(N, N, N, N)
- D(Y, N, N, N)
- D(Y, N, M, M)
- D(Y, M, X, X)
- D(N, M, X, X)

'phantom most similar to TG43'

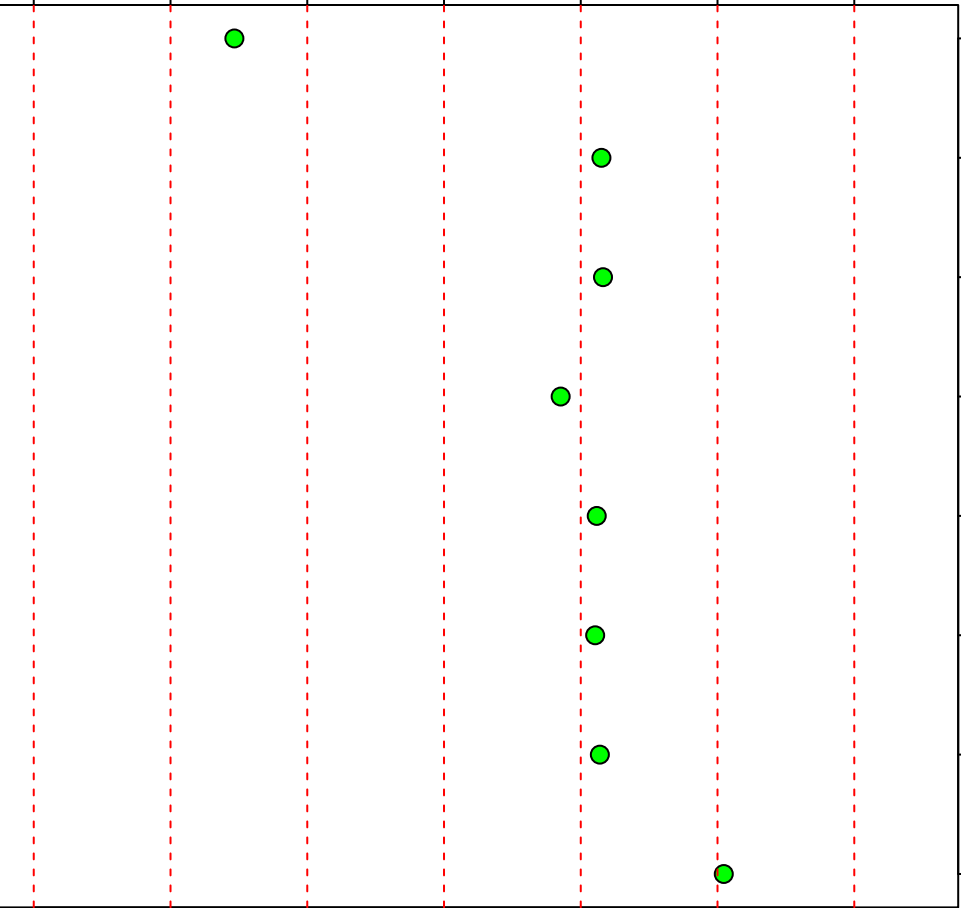

%diff 100\*(GBBS-TG43)/TG43

GBBS(solid model applicator, body, balloon & rectal contrast, packing contrast)

# Patient\_07 ICRU rectum

'phantom least similar to TG43'

- D(Y, N, B, B)
- D(Y, N, B, N)
- D(Y, N, B, M)
- D(N, N, N, N)
- D(Y, N, N, N)
- D(Y, N, M, M)
- D(Y, M, X, X)
- D(N, M, X, X)

'phantom most similar to TG43'

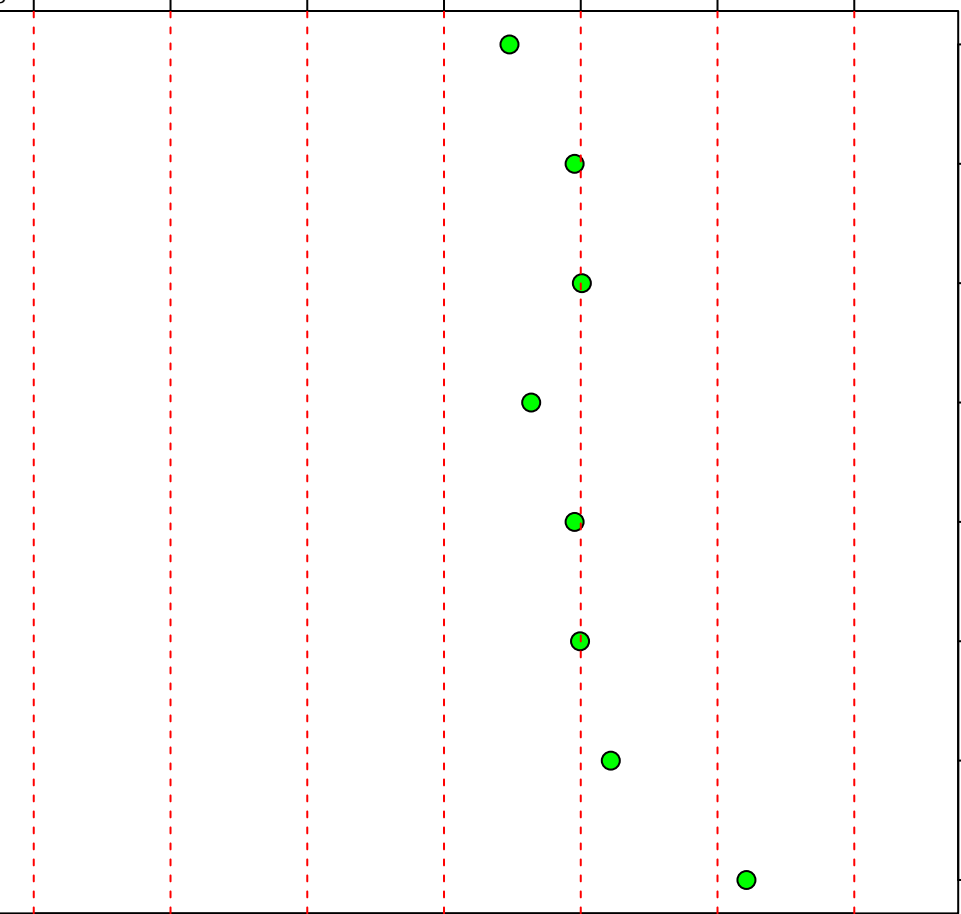

%diff 100\*(GBBS-TG43)/TG43

GBBS(solid model applicator, body, balloon & rectal contrast, packing contrast)

# Patient\_08 ICRU rectum

'phantom least similar to TG43'

D(Y, N, B, B)

D(Y, N, B, N)

D(Y, N, B, M)

D(N, N, N, N)

D(Y, N, N, N)

D(Y, N, M, M)

D(Y, M, X, X)

D(N, M, X, X)

'phantom most similar to TG43'

-10 -8 -6 -4 -2 0 2

%diff 100\*(GBBS-TG43)/TG43

GBBS(solid model applicator, body, balloon & rectal contrast, packing contrast)

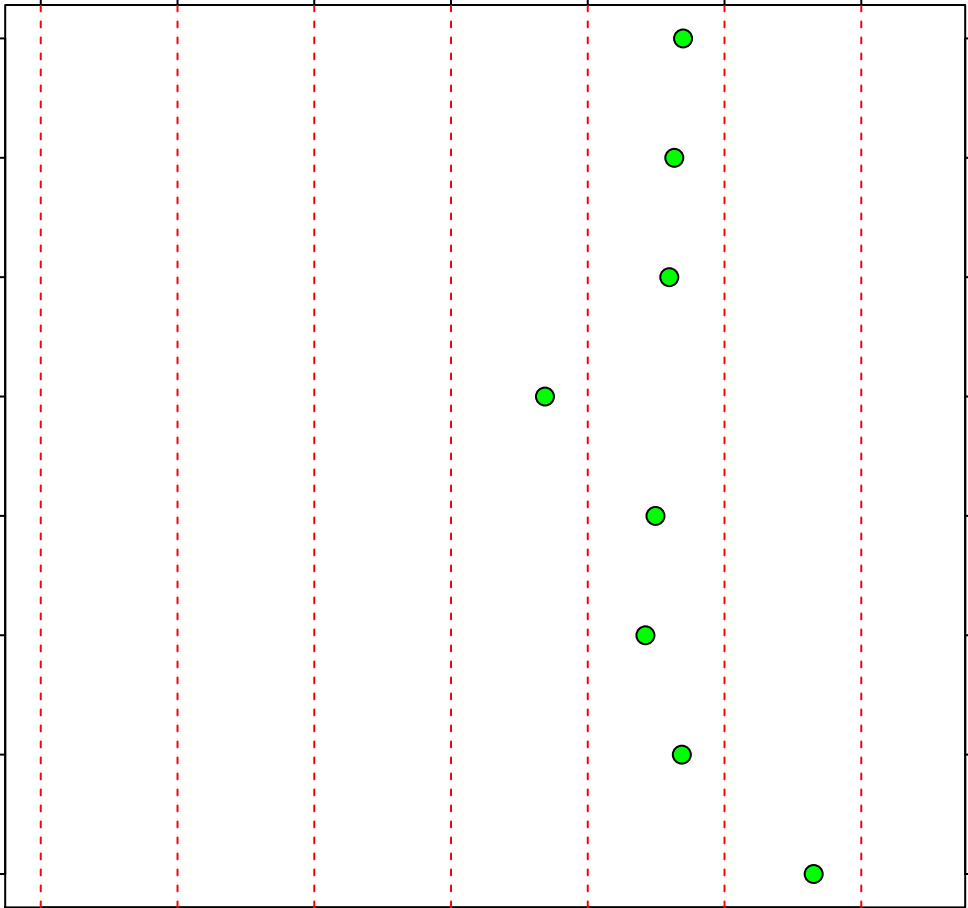

# Patient\_09 ICRU rectum

'phantom least similar to TG43'

- D(Y, N, B, B)
- D(Y, N, B, N)
- D(Y, N, B, M)
- D(N, N, N, N)
- D(Y, N, N, N)
- D(Y, N, M, M)
- D(Y, M, X, X)
- D(N, M, X, X)

'phantom most similar to TG43'

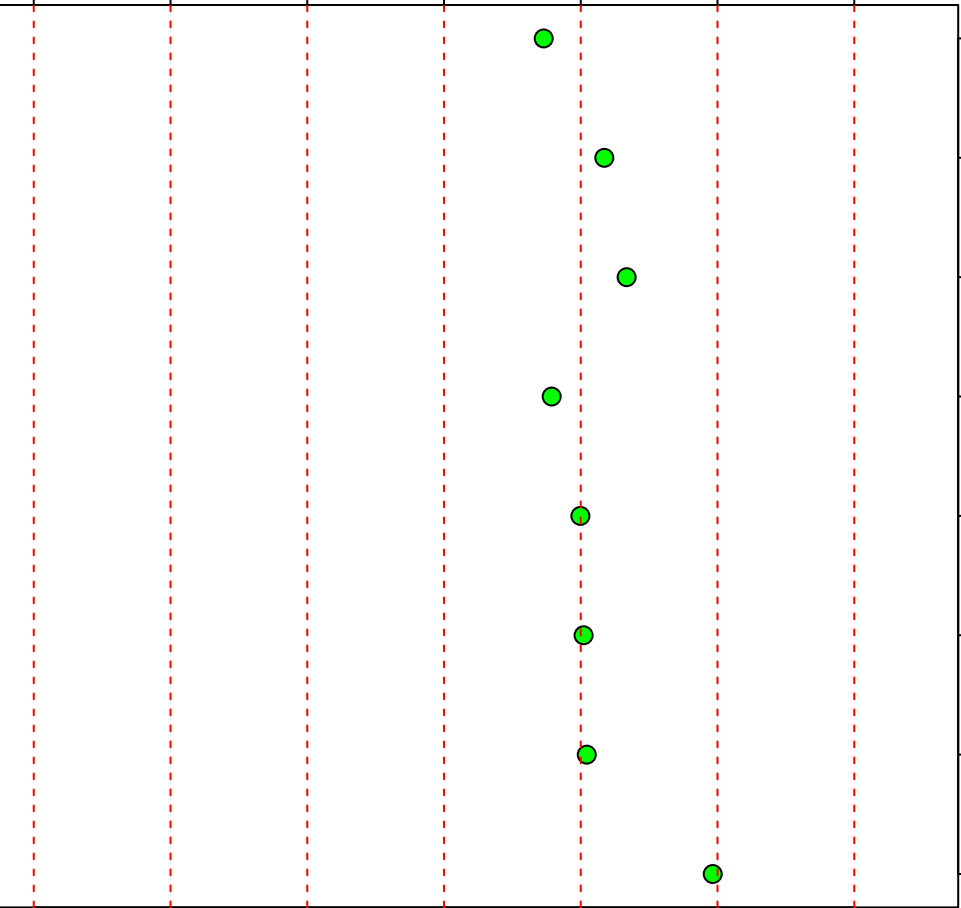

%diff 100\*(GBBS-TG43)/TG43

GBBS(solid model applicator, body, balloon & rectal contrast, packing contrast)

# Patient\_10 ICRU rectum

'phantom least similar to TG43'

- D(Y, N, B, B)
- D(Y, N, B, N)
- D(Y, N, B, M)
- D(N, N, N, N)
- D(Y, N, N, N)
- D(Y, N, M, M)
- D(Y, M, X, X)
- D(N, M, X, X)

'phantom most similar to TG43'

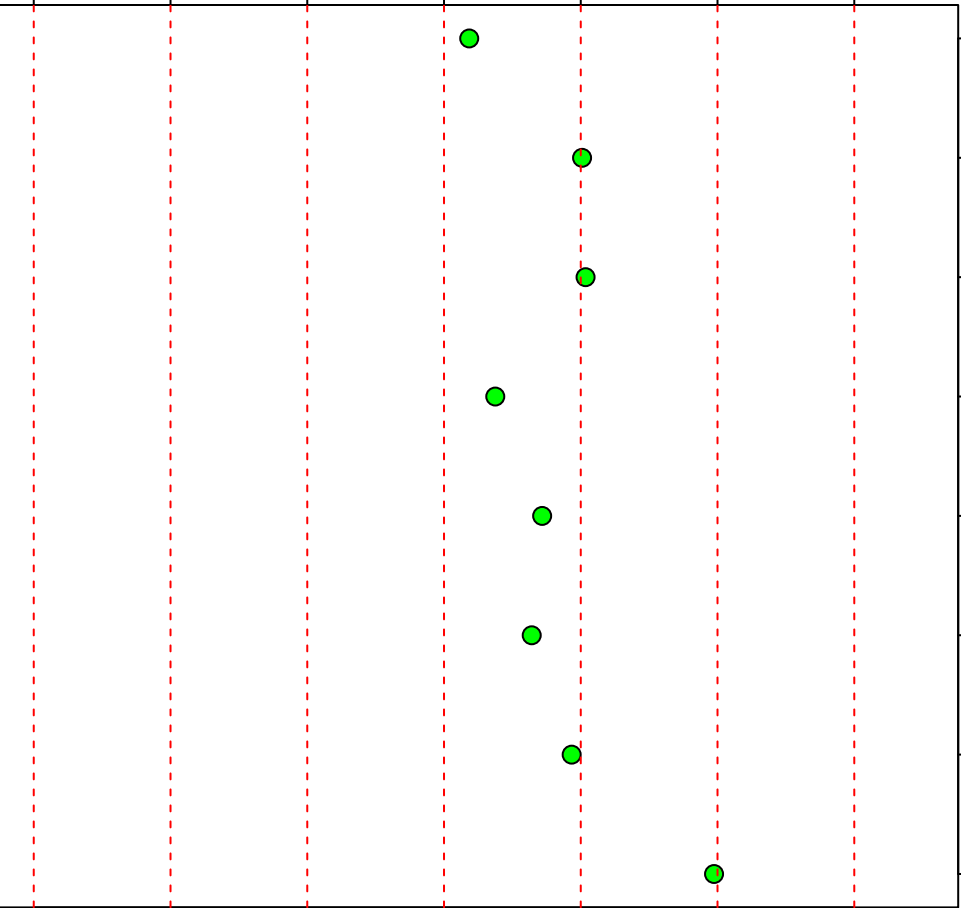

%diff 100\*(GBBS-TG43)/TG43

GBBS(solid model applicator, body, balloon & rectal contrast, packing contrast)

# Patient\_11 ICRU rectum

'phantom least similar to TG43'

- D(Y, N, B, B)
- D(Y, N, B, N)
- D(Y, N, B, M)
- D(N, N, N, N)
- D(Y, N, N, N)
- D(Y, N, M, M)
- D(Y, M, X, X)
- D(N, M, X, X)

'phantom most similar to TG43'

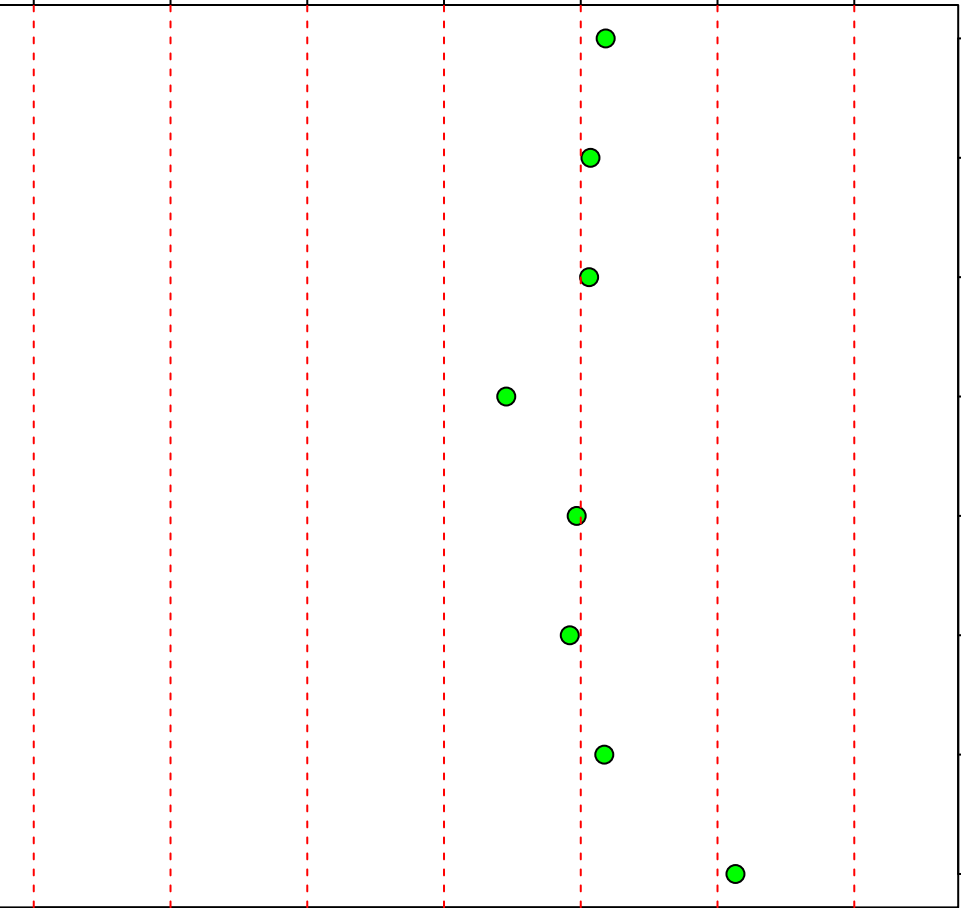

%diff 100\*(GBBS-TG43)/TG43

GBBS(solid model applicator, body, balloon & rectal contrast, packing contrast)

# Patient\_12 ICRU rectum

'phantom least similar to TG43'

D(Y, N, B, B)

D(Y, N, B, N)

D(Y, N, B, M)

D(N, N, N, N)

D(Y, N, N, N)

D(Y, N, M, M)

D(Y, M, X, X)

D(N, M, X, X)

'phantom most similar to TG43'



%diff 100\*(GBBS-TG43)/TG43

GBBS(solid model applicator, body, balloon & rectal contrast, packing contrast)

# Patient\_13 ICRU rectum

'phantom least similar to TG43'

D(Y, N, B, B)

D(Y, N, B, N)

D(Y, N, B, M)

D(N, N, N, N)

D(Y, N, N, N)

D(Y, N, M, M)

D(Y, M, X, X)

D(N, M, X, X)

'phantom most similar to TG43'

-10

-8

-6

-4

-2

0

2

%diff 100\*(GBBS-TG43)/TG43

GBBS(solid model applicator, body, balloon & rectal contrast, packing contrast)

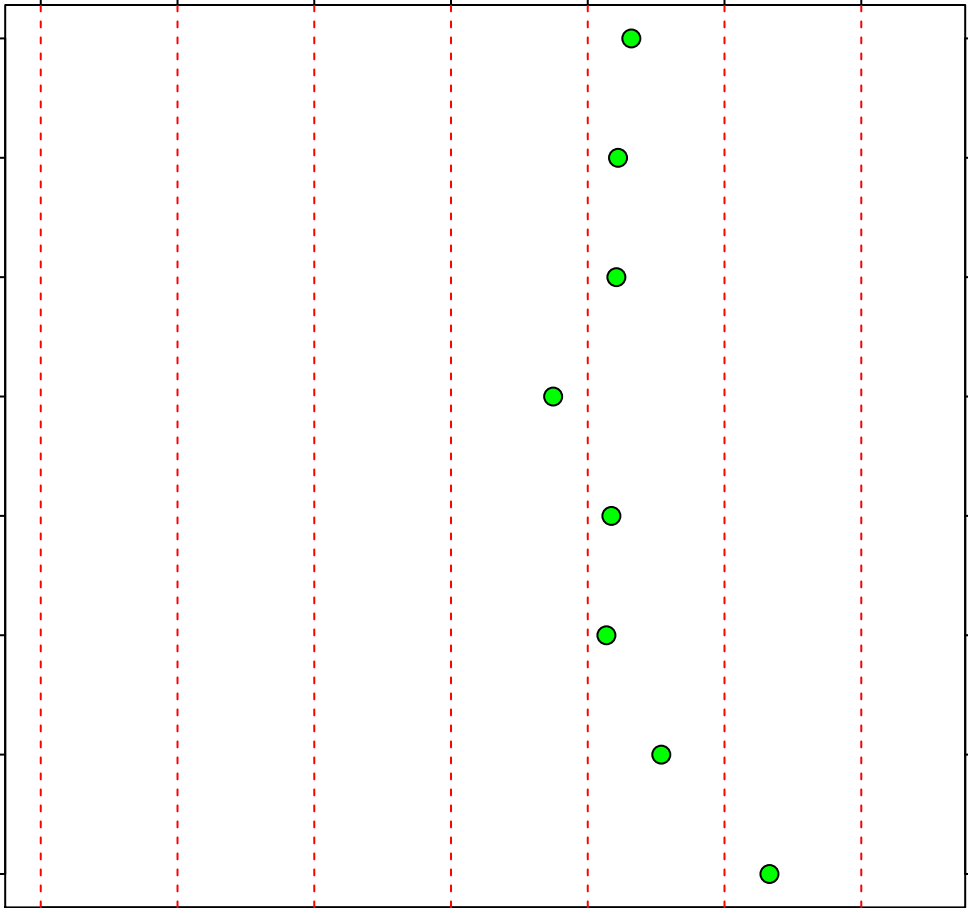



# Patient\_14 ICRU rectum

'phantom least similar to TG43'

D(Y, N, B, B)

D(Y, N, B, N)

D(Y, N, B, M)

D(N, N, N, N)

D(Y, N, N, N)

D(Y, N, M, M)

D(Y, M, X, X)

D(N, M, X, X)

'phantom most similar to TG43'

-10 -8 -6 -4 -2 0 2

%diff 100\*(GBBS-TG43)/TG43

GBBS(solid model applicator, body, balloon & rectal contrast, packing contrast)

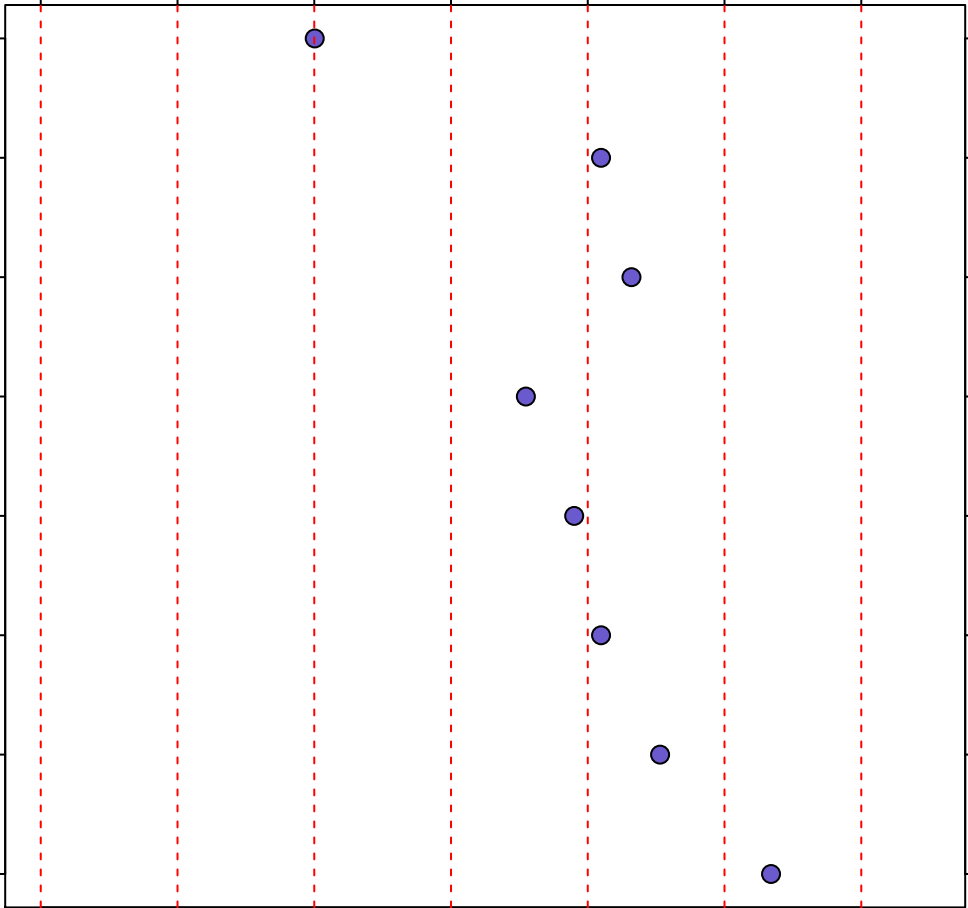

# Patient\_15 ICRU rectum

'phantom least similar to TG43'

D(Y, N, B, B)

D(Y, N, B, N)

D(Y, N, B, M)

D(N, N, N, N)

D(Y, N, N, N)

D(Y, N, M, M)

D(Y, M, X, X)

D(N, M, X, X)

'phantom most similar to TG43'

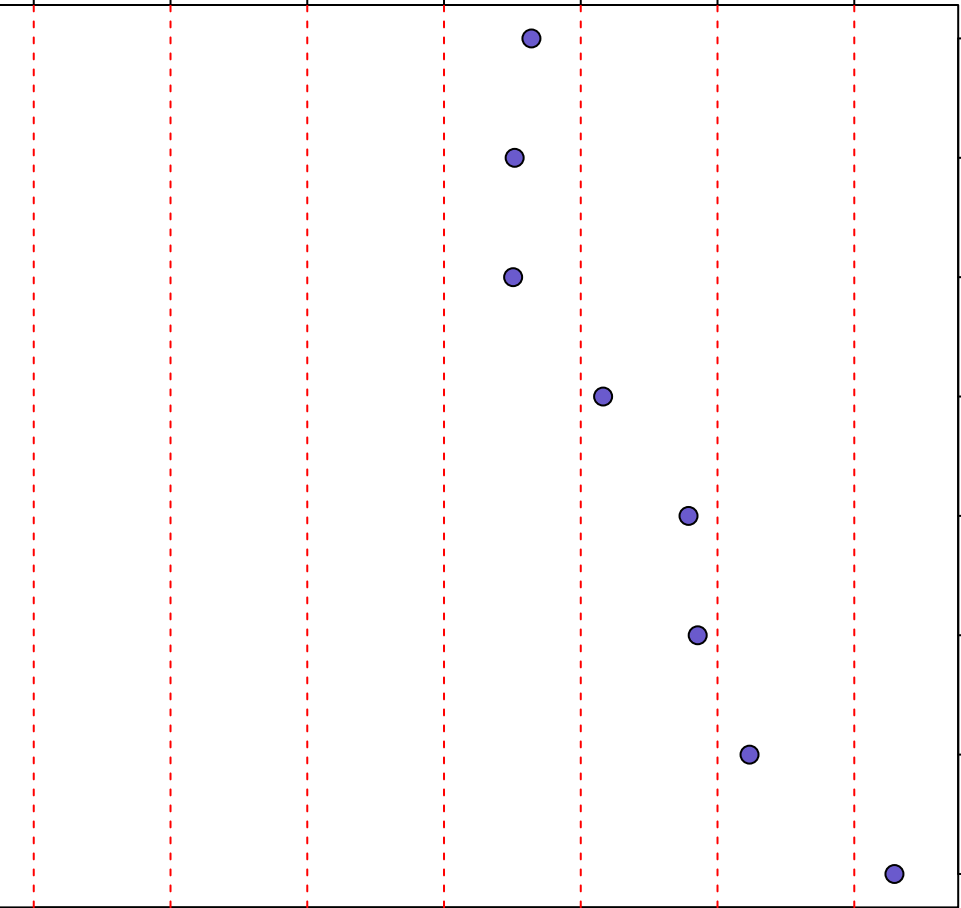

-10 -8 -6 -4 -2 0 2

%diff 100\*(GBBS-TG43)/TG43

GBBS(solid model applicator, body, balloon & rectal contrast, packing contrast)

# Patient\_16 ICRU rectum

'phantom least similar to TG43'

- D(Y, N, B, B)
- D(Y, N, B, N)
- D(Y, N, B, M)
- D(N, N, N, N)
- D(Y, N, N, N)
- D(Y, N, M, M)
- D(Y, M, X, X)
- D(N, M, X, X)

'phantom most similar to TG43'

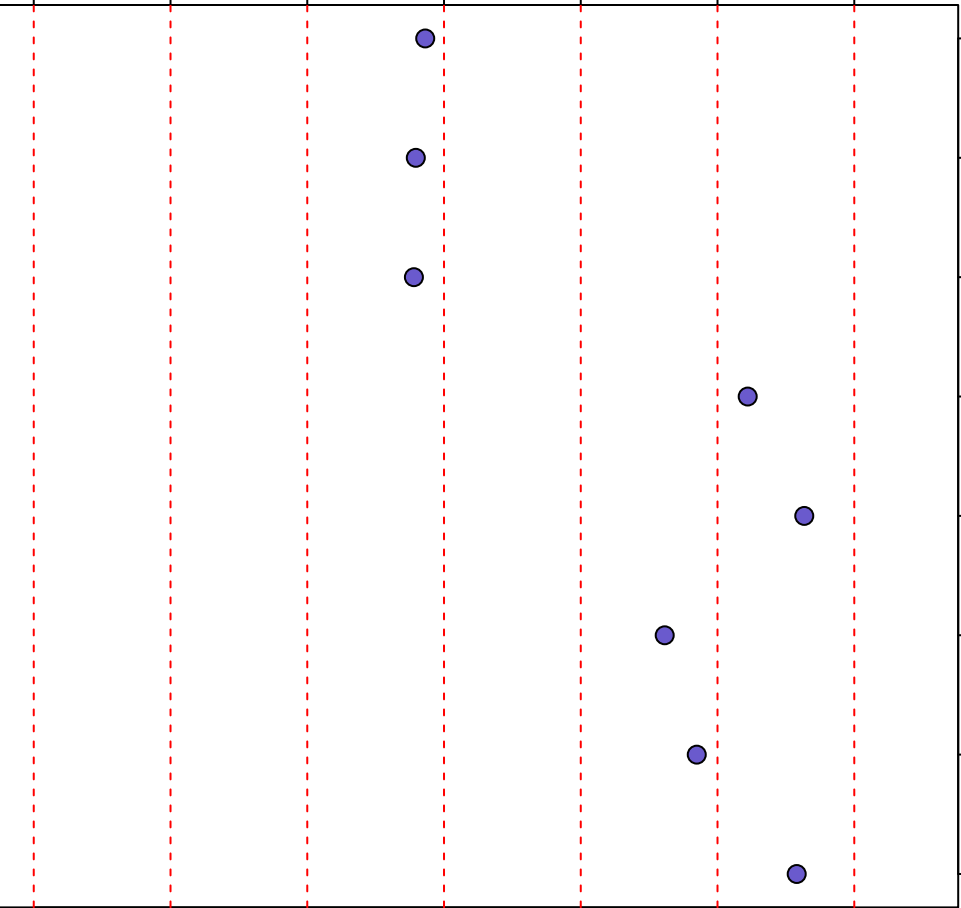

%diff 100\*(GBBS-TG43)/TG43

GBBS(solid model applicator, body, balloon & rectal contrast, packing contrast)

# Patient\_17 ICRU rectum

'phantom least similar to TG43'

D(Y, N, B, B)

D(Y, N, B, N)

D(Y, N, B, M)

D(N, N, N, N)

D(Y, N, N, N)

D(Y, N, M, M)

D(Y, M, X, X)

D(N, M, X, X)

'phantom most similar to TG43'

-10 -8 -6 -4 -2 0 2

%diff 100\*(GBBS-TG43)/TG43

GBBS(solid model applicator, body, balloon & rectal contrast, packing contrast)

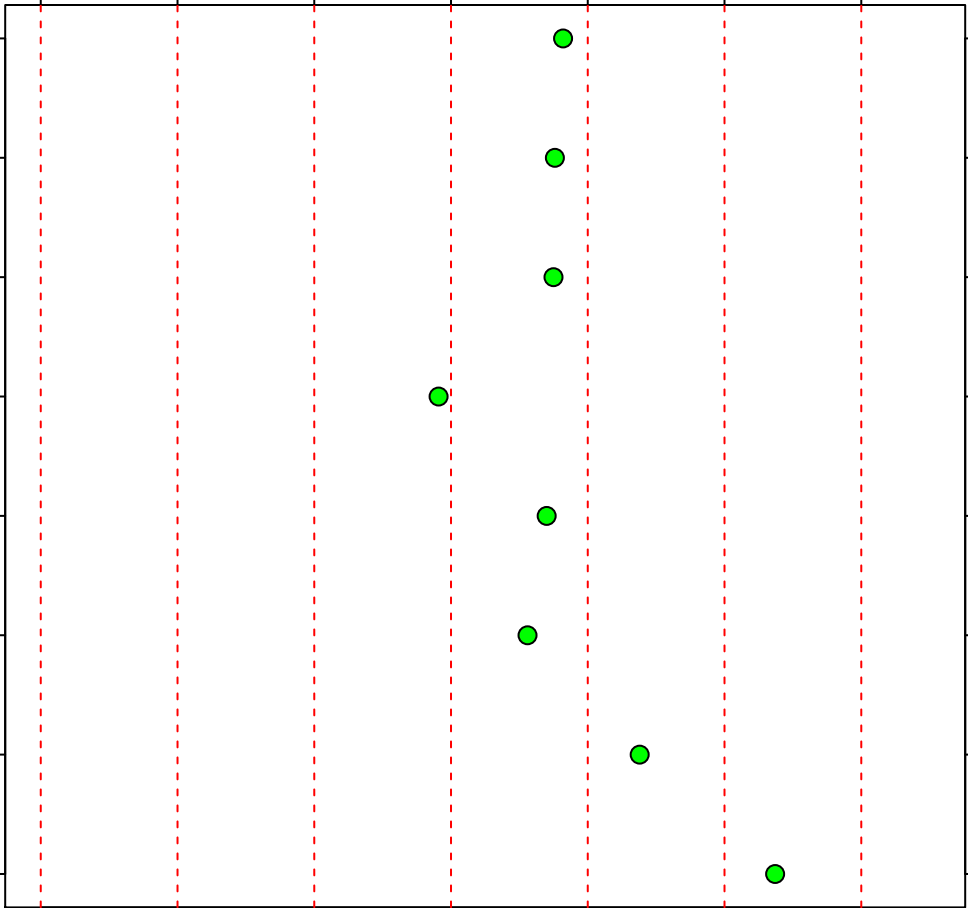

# Patient\_18 ICRU rectum

'phantom least similar to TG43'

D(Y, N, B, B)

D(Y, N, B, N)

D(Y, N, B, M)

D(N, N, N, N)

D(Y, N, N, N)

D(Y, N, M, M)

D(Y, M, X, X)

D(N, M, X, X)

'phantom most similar to TG43'



%diff 100\*(GBBS-TG43)/TG43

GBBS(solid model applicator, body, balloon & rectal contrast, packing contrast)

# Patient\_19 ICRU rectum

'phantom least similar to TG43'

- D(Y, N, B, B)
- D(Y, N, B, N)
- D(Y, N, B, M)
- D(N, N, N, N)
- D(Y, N, N, N)
- D(Y, N, M, M)
- D(Y, M, X, X)
- D(N, M, X, X)

'phantom most similar to TG43'

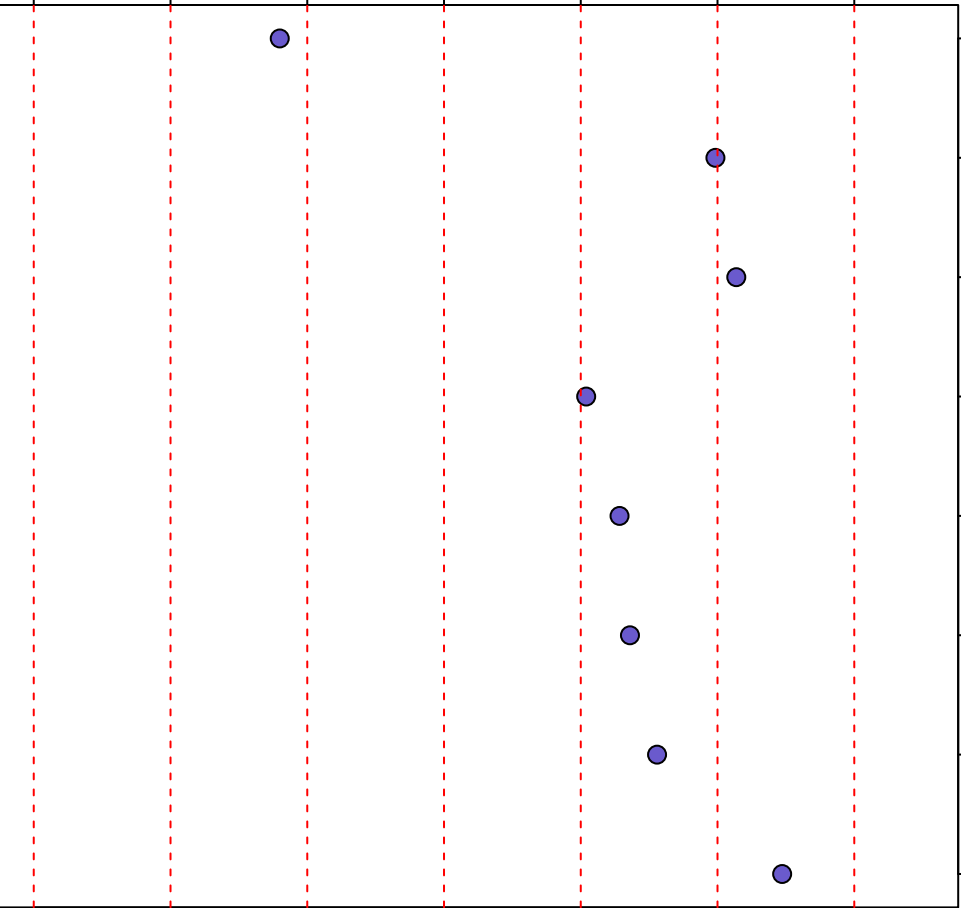

-10 -8 -6 -4 -2 0 2

%diff 100\*(GBBS-TG43)/TG43

GBBS(solid model applicator, body, balloon & rectal contrast, packing contrast)

# Patient\_20 ICRU rectum

'phantom least similar to TG43'

D(Y, N, B, B)

D(Y, N, B, N)

D(Y, N, B, M)

D(N, N, N, N)

D(Y, N, N, N)

D(Y, N, M, M)

D(Y, M, X, X)

D(N, M, X, X)

'phantom most similar to TG43'

-10

-8

-6

-4

-2

0

2

%diff 100\*(GBBS-TG43)/TG43

GBBS(solid model applicator, body, balloon & rectal contrast, packing contrast)

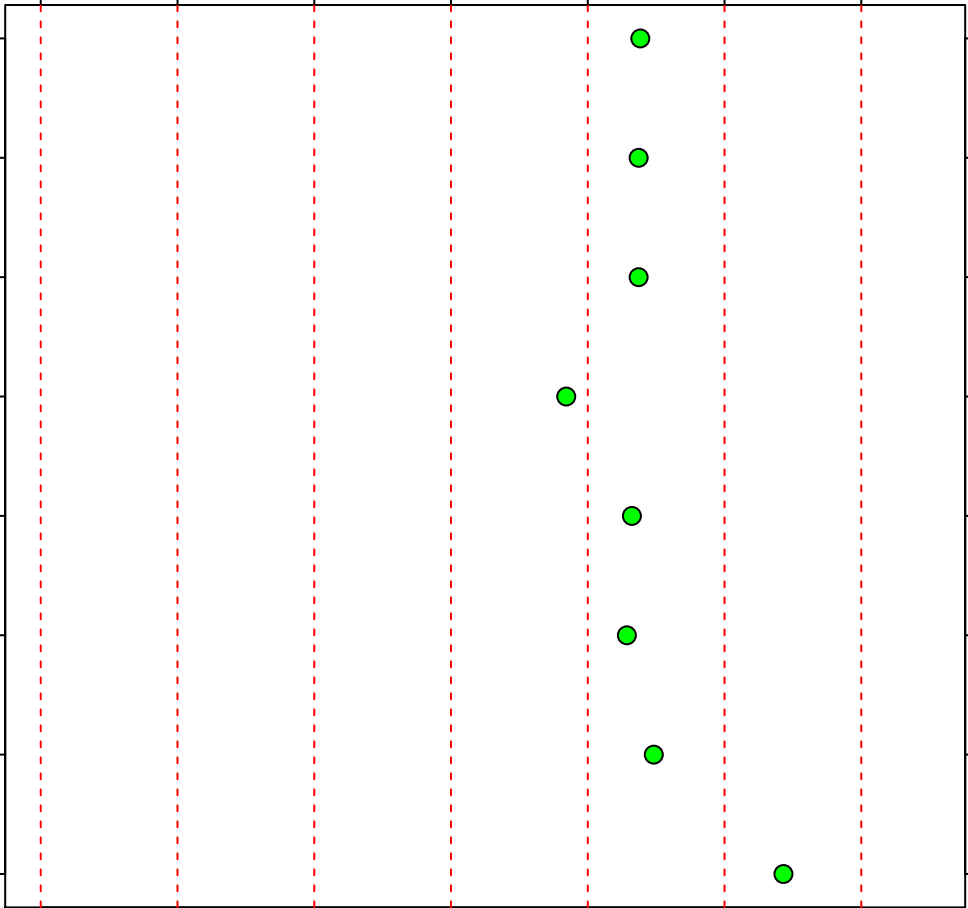

# Patient\_21 ICRU rectum

'phantom least similar to TG43'

- D(Y, N, B, B)
- D(Y, N, B, N)
- D(Y, N, B, M)
- D(N, N, N, N)
- D(Y, N, N, N)
- D(Y, N, M, M)
- D(Y, M, X, X)
- D(N, M, X, X)

'phantom most similar to TG43'

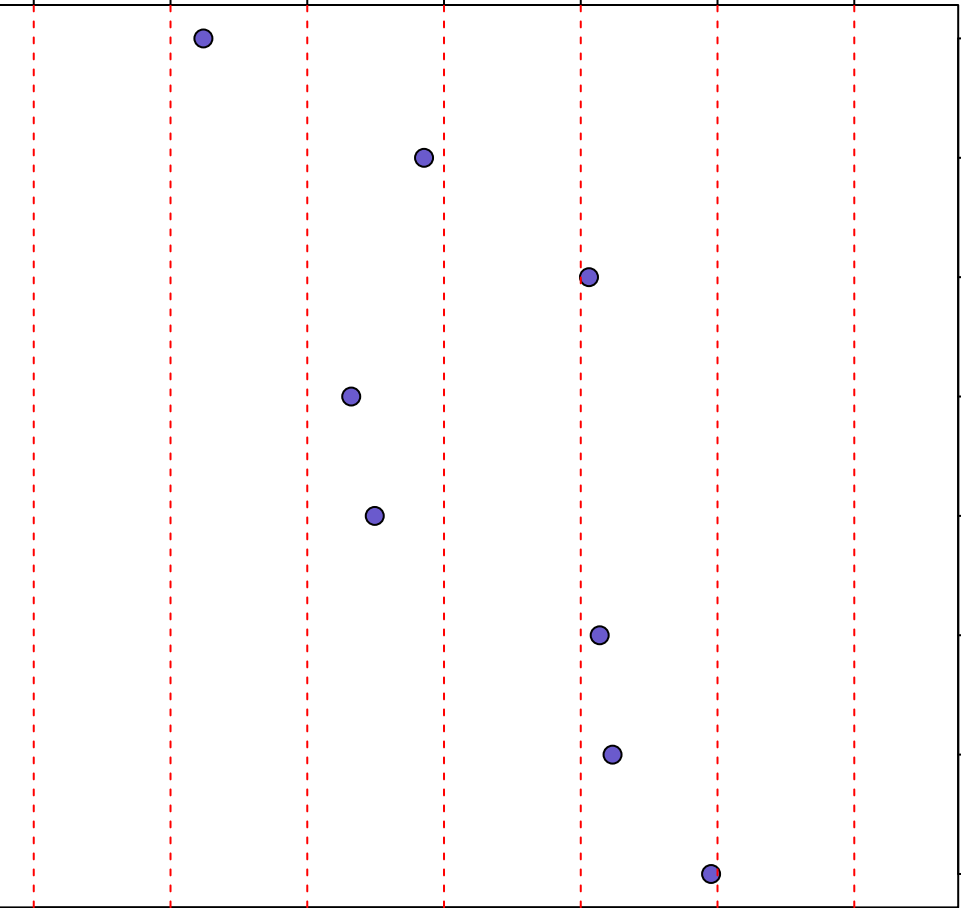

-10 -8 -6 -4 -2 0 2

%diff 100\*(GBBS-TG43)/TG43

GBBS(solid model applicator, body, balloon & rectal contrast, packing contrast)



# Patient\_22 ICRU rectum

'phantom least similar to TG43'

- D(Y, N, B, B)
- D(Y, N, B, N)
- D(Y, N, B, M)
- D(N, N, N, N)
- D(Y, N, N, N)
- D(Y, N, M, M)
- D(Y, M, X, X)
- D(N, M, X, X)

'phantom most similar to TG43'

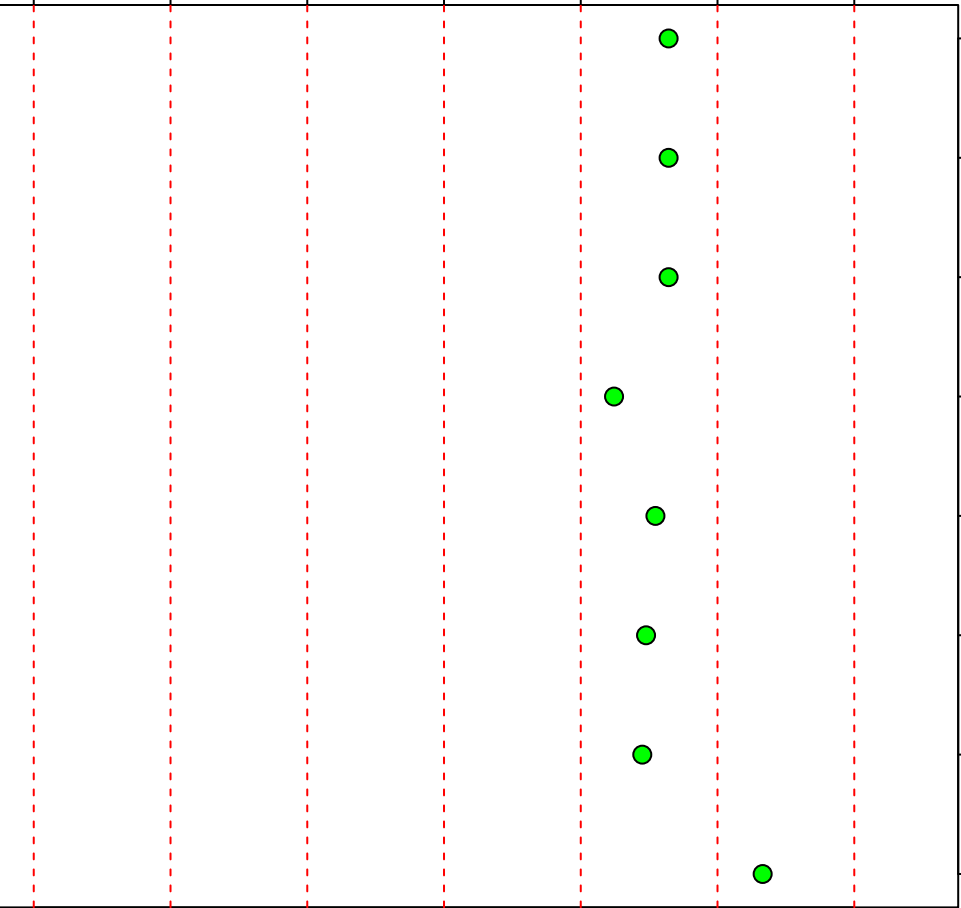

%diff 100\*(GBBS-TG43)/TG43

GBBS(solid model applicator, body, balloon & rectal contrast, packing contrast)

# Patient\_23 ICRU rectum

'phantom least similar to TG43'

D(Y, N, B, B)

D(Y, N, B, N)

D(Y, N, B, M)

D(N, N, N, N)

D(Y, N, N, N)

D(Y, N, M, M)

D(Y, M, X, X)

D(N, M, X, X)

'phantom most similar to TG43'

-10 -8 -6 -4 -2 0 2

%diff 100\*(GBBS-TG43)/TG43

GBBS(solid model applicator, body, balloon & rectal contrast, packing contrast)

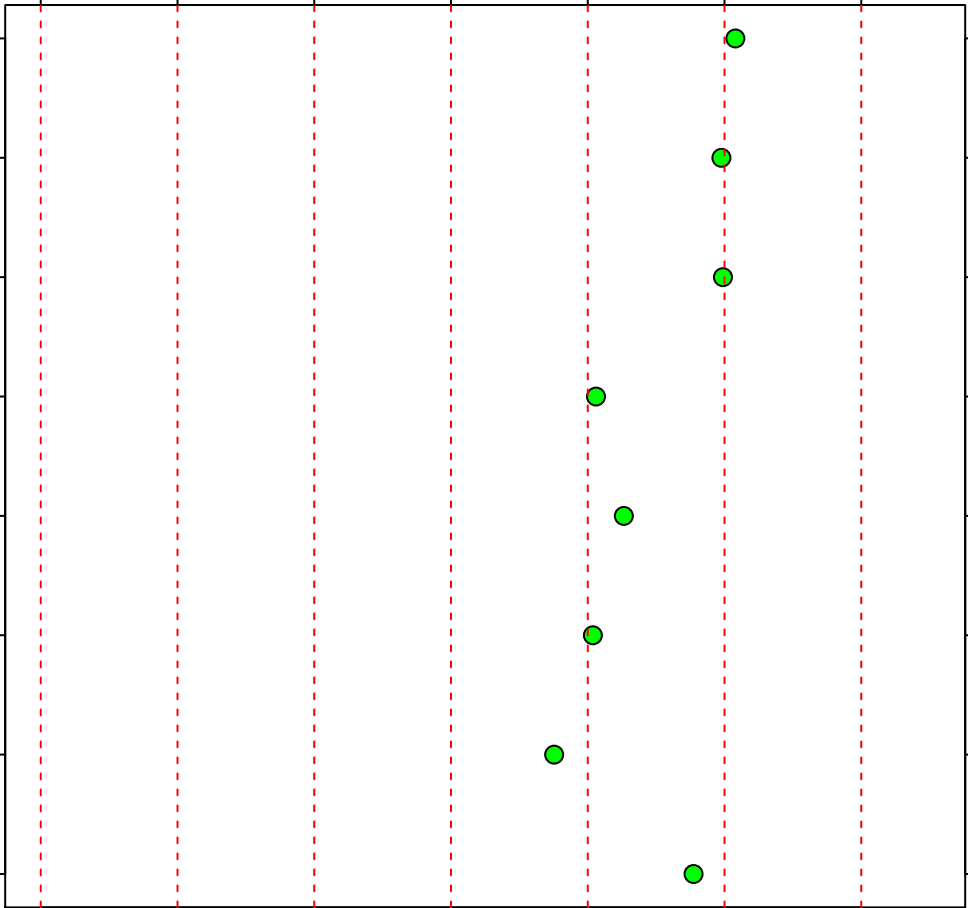

# Patient\_24 ICRU rectum

'phantom least similar to TG43'

D(Y, N, B, B)

D(Y, N, B, N)

D(Y, N, B, M)

D(N, N, N, N)

D(Y, N, N, N)

D(Y, N, M, M)

D(Y, M, X, X)

D(N, M, X, X)

'phantom most similar to TG43'

-10

-8

-6

-4

-2

0

2

%diff 100\*(GBBS-TG43)/TG43

GBBS(solid model applicator, body, balloon & rectal contrast, packing contrast)

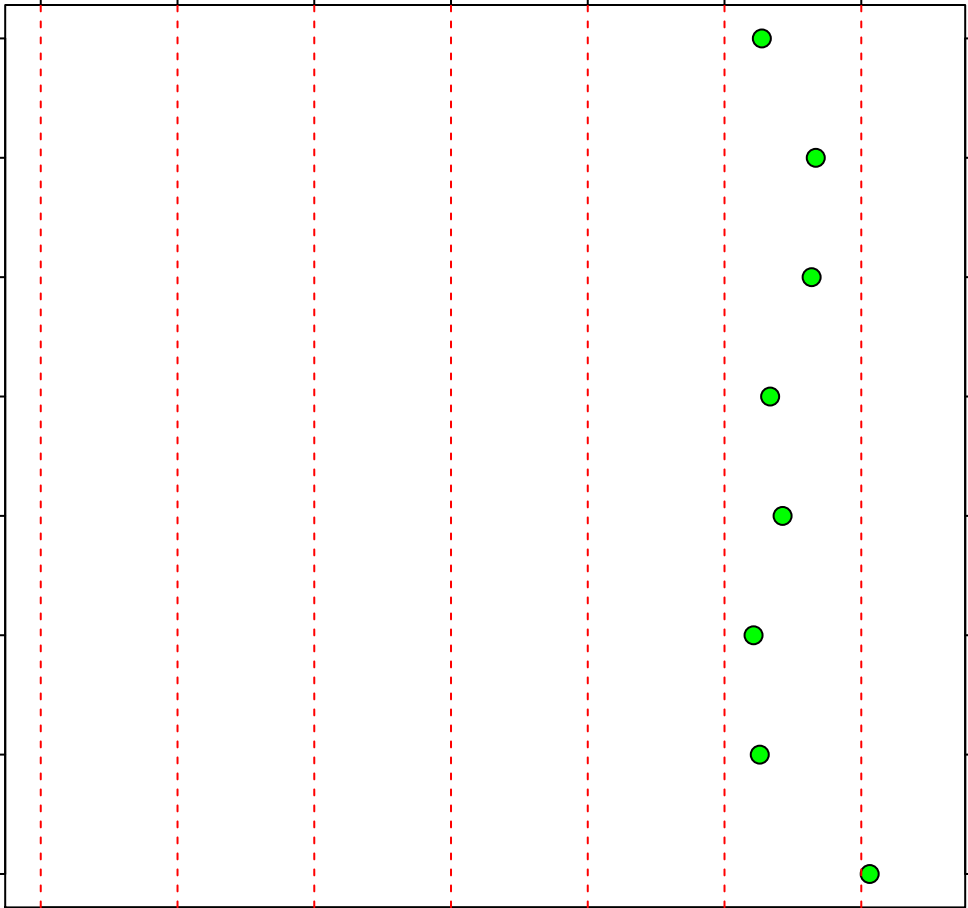

# Patient\_25 ICRU rectum

'phantom least similar to TG43'

D(Y, N, B, B)

D(Y, N, B, N)

D(Y, N, B, M)

D(N, N, N, N)

D(Y, N, N, N)

D(Y, N, M, M)

D(Y, M, X, X)

D(N, M, X, X)

'phantom most similar to TG43'

-10 -8 -6 -4 -2 0 2

%diff 100\*(GBBS-TG43)/TG43

GBBS(solid model applicator, body, balloon & rectal contrast, packing contrast)

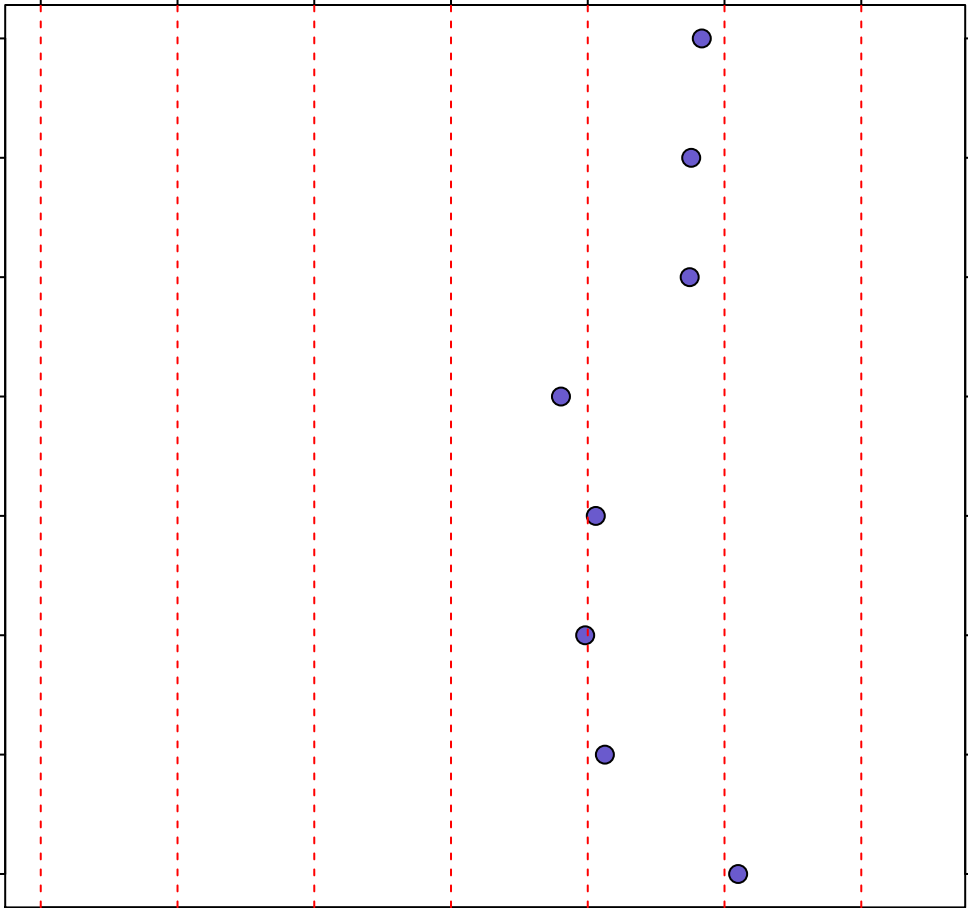

# Patient\_26 ICRU rectum

'phantom least similar to TG43'

D(Y, N, B, B)

D(Y, N, B, N)

D(Y, N, B, M)

D(N, N, N, N)

D(Y, N, N, N)

D(Y, N, M, M)

D(Y, M, X, X)

D(N, M, X, X)

'phantom most similar to TG43'

-10 -8 -6 -4 -2 0 2

%diff 100\*(GBBS-TG43)/TG43

GBBS(solid model applicator, body, balloon & rectal contrast, packing contrast)

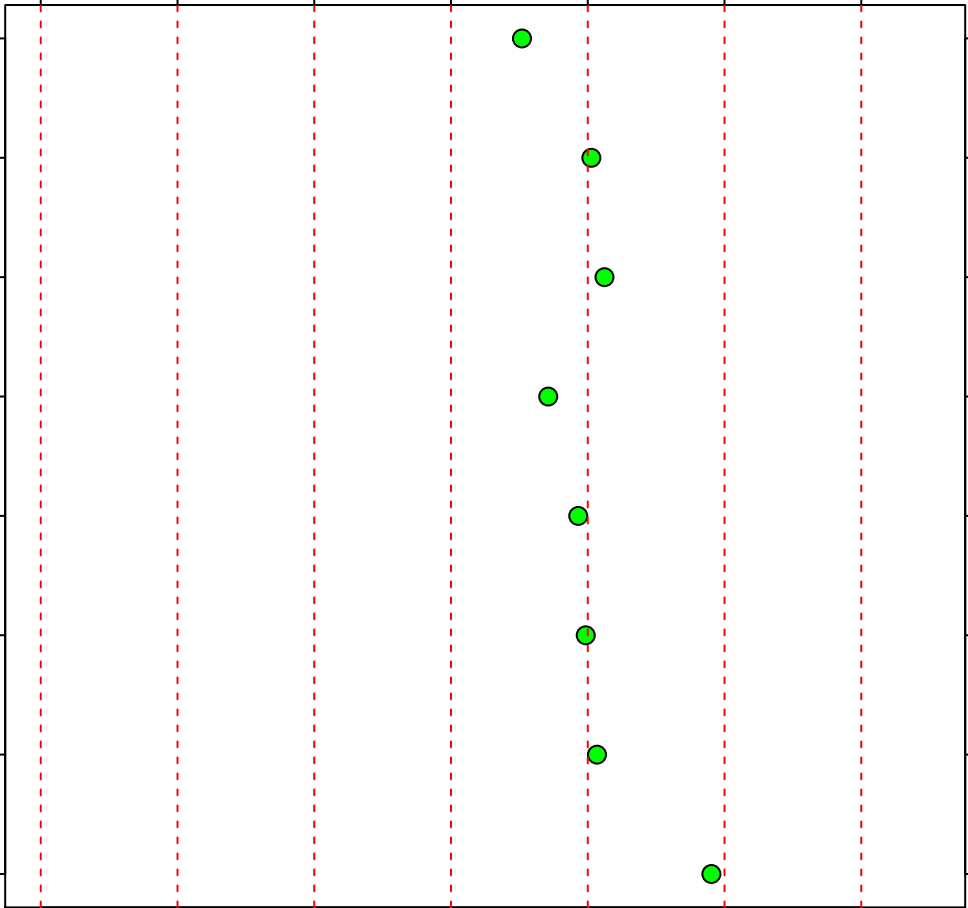

# Patient\_01 D2cc bladder

'phantom least similar to TG43'

D(Y, N, B, B)

D(Y, N, B, N)

D(Y, N, B, M)

D(N, N, N, N)

D(Y, N, N, N)

D(Y, N, M, M)

D(Y, M, X, X)

D(N, M, X, X)

'phantom most similar to TG43'

-10

-8

-6

-4

-2

0

2

%diff 100\*(GBBS-TG43)/TG43

GBBS(solid model applicator, body, balloon & rectal contrast, packing contrast)

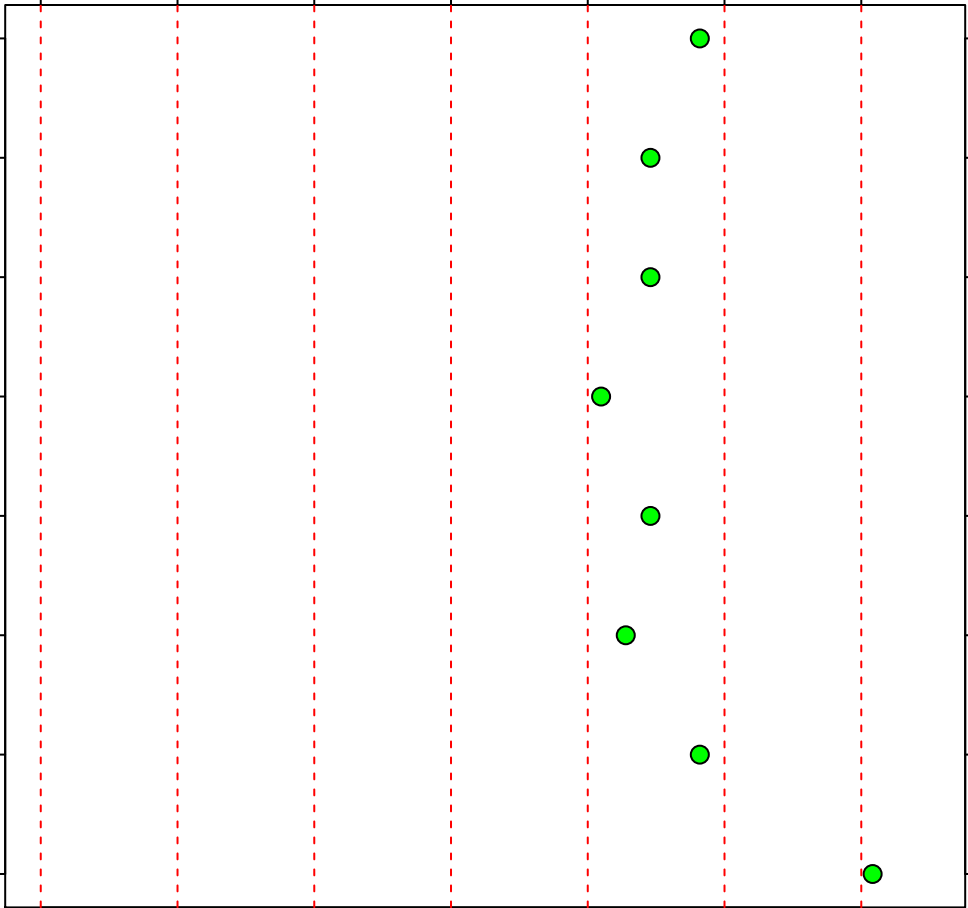

# Patient\_02 D2cc bladder

'phantom least similar to TG43'

- D(Y, N, B, B)
- D(Y, N, B, N)
- D(Y, N, B, M)
- D(N, N, N, N)
- D(Y, N, N, N)
- D(Y, N, M, M)
- D(Y, M, X, X)
- D(N, M, X, X)

'phantom most similar to TG43'

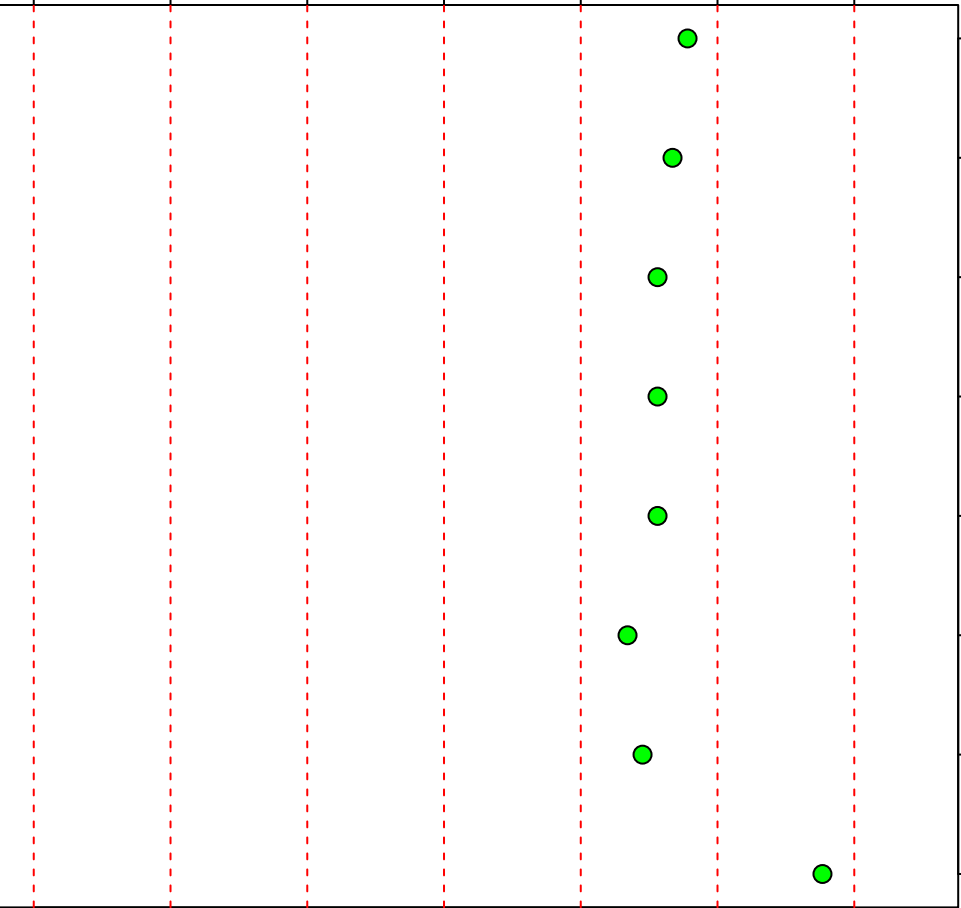

%diff 100\*(GBBS-TG43)/TG43

GBBS(solid model applicator, body, balloon & rectal contrast, packing contrast)

# Patient\_03 D2cc bladder

'phantom least similar to TG43'

D(Y, N, B, B)

D(Y, N, B, N)

D(Y, N, B, M)

D(N, N, N, N)

D(Y, N, N, N)

D(Y, N, M, M)

D(Y, M, X, X)

D(N, M, X, X)

'phantom most similar to TG43'

-10 -8 -6 -4 -2 0 2

%diff 100\*(GBBS-TG43)/TG43

GBBS(solid model applicator, body, balloon & rectal contrast, packing contrast)

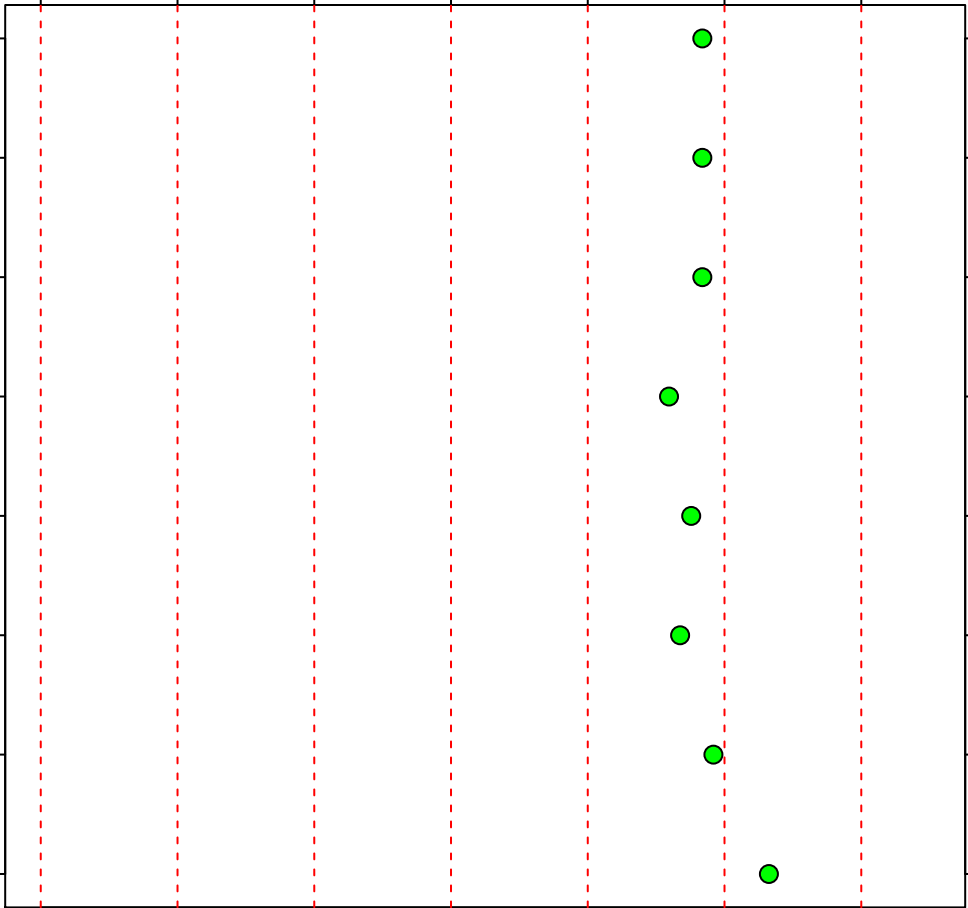



# Patient\_04 D2cc bladder

'phantom least similar to TG43'

D(Y, N, B, B)

D(Y, N, B, N)

D(Y, N, B, M)

D(N, N, N, N)

D(Y, N, N, N)

D(Y, N, M, M)

D(Y, M, X, X)

D(N, M, X, X)

'phantom most similar to TG43'

-10 -8 -6 -4 -2 0 2

%diff 100\*(GBBS-TG43)/TG43

GBBS(solid model applicator, body, balloon & rectal contrast, packing contrast)

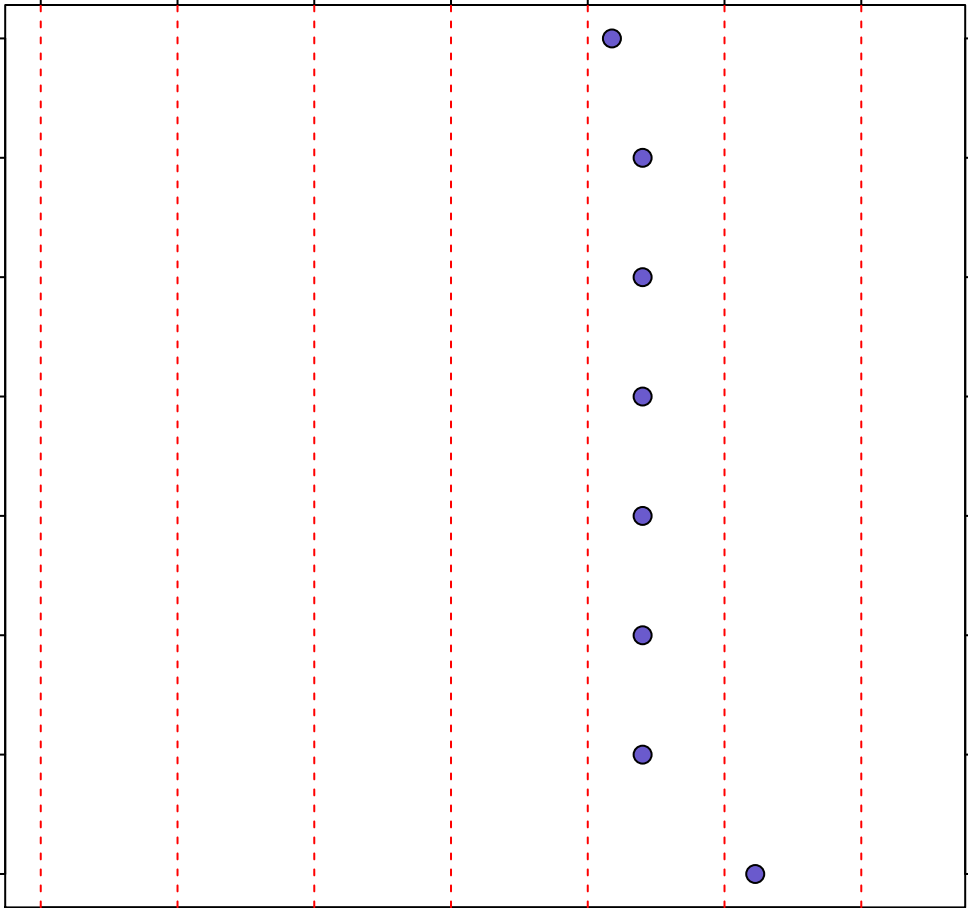

# Patient\_05 D2cc bladder

GBBS(solid model applicator, body, balloon & rectal contrast, packing contrast)

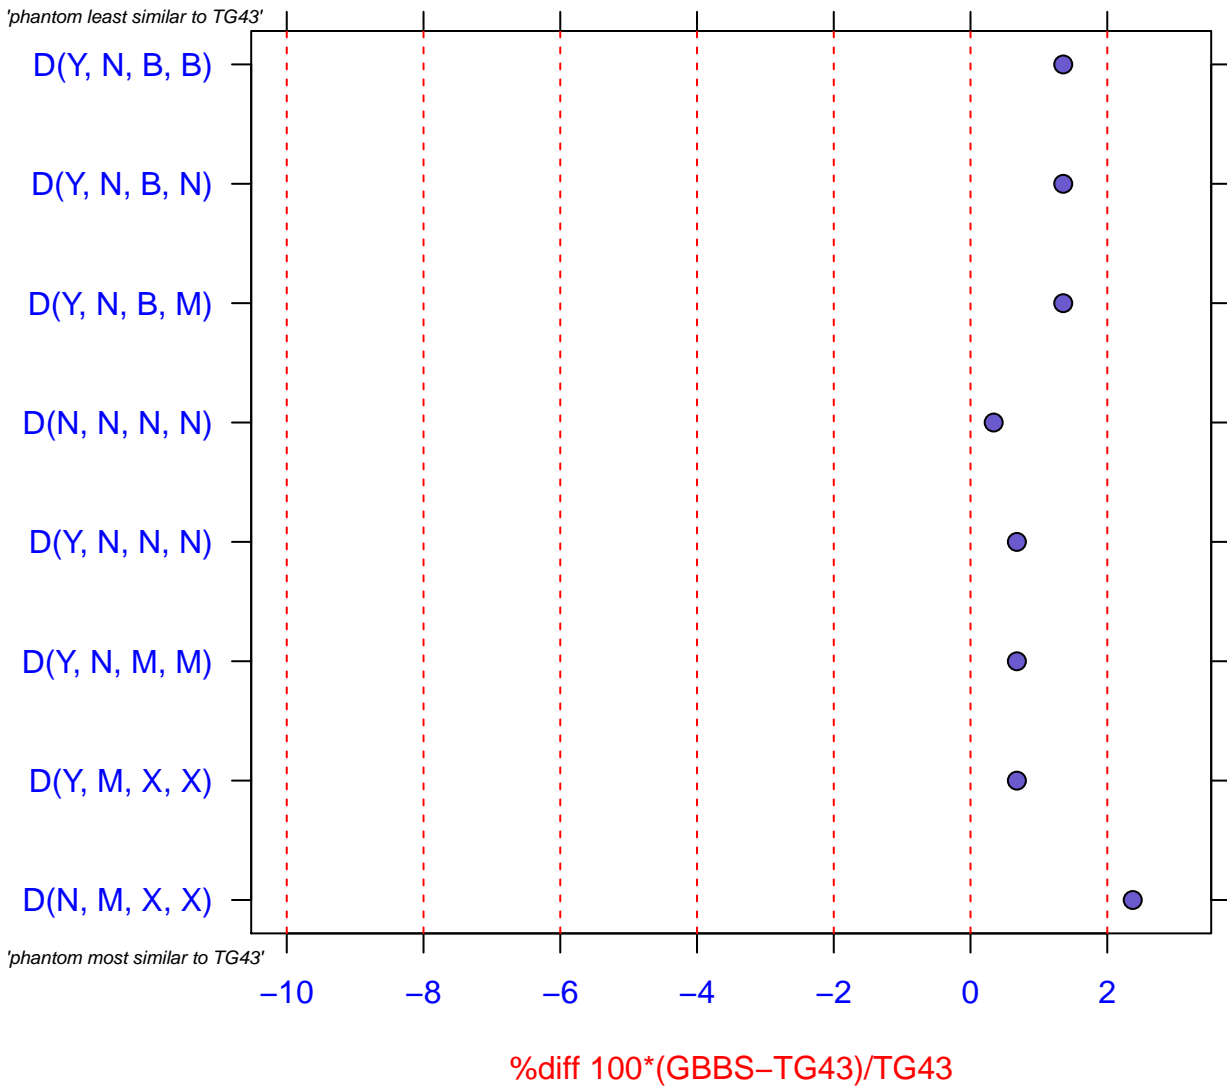

# Patient\_06 D2cc bladder

'phantom least similar to TG43'

D(Y, N, B, B)

D(Y, N, B, N)

D(Y, N, B, M)

D(N, N, N, N)

D(Y, N, N, N)

D(Y, N, M, M)

D(Y, M, X, X)

D(N, M, X, X)

'phantom most similar to TG43'

-10 -8 -6 -4 -2 0 2

%diff 100\*(GBBS-TG43)/TG43

GBBS(solid model applicator, body, balloon & rectal contrast, packing contrast)

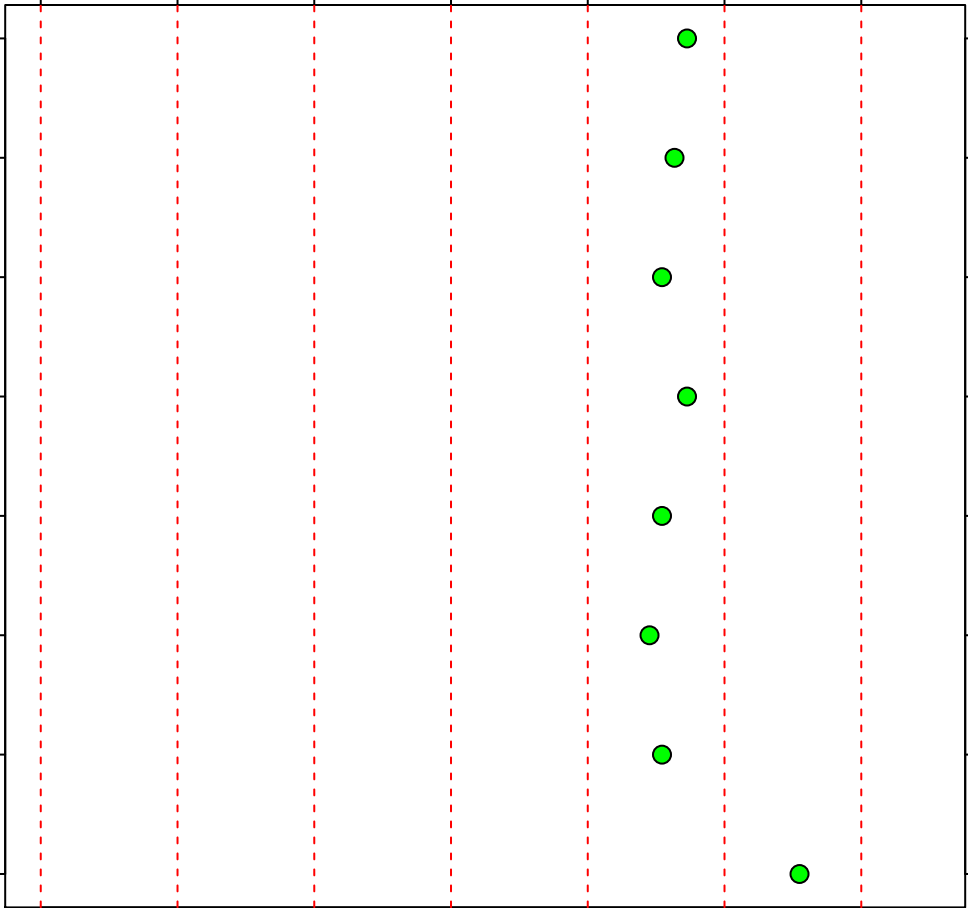

# Patient\_07 D2cc bladder

'phantom least similar to TG43'

D(Y, N, B, B)

D(Y, N, B, N)

D(Y, N, B, M)

D(N, N, N, N)

D(Y, N, N, N)

D(Y, N, M, M)

D(Y, M, X, X)

D(N, M, X, X)

'phantom most similar to TG43'

-10

-8

-6

-4

-2

0

2

%diff 100\*(GBBS-TG43)/TG43

GBBS(solid model applicator, body, balloon & rectal contrast, packing contrast)

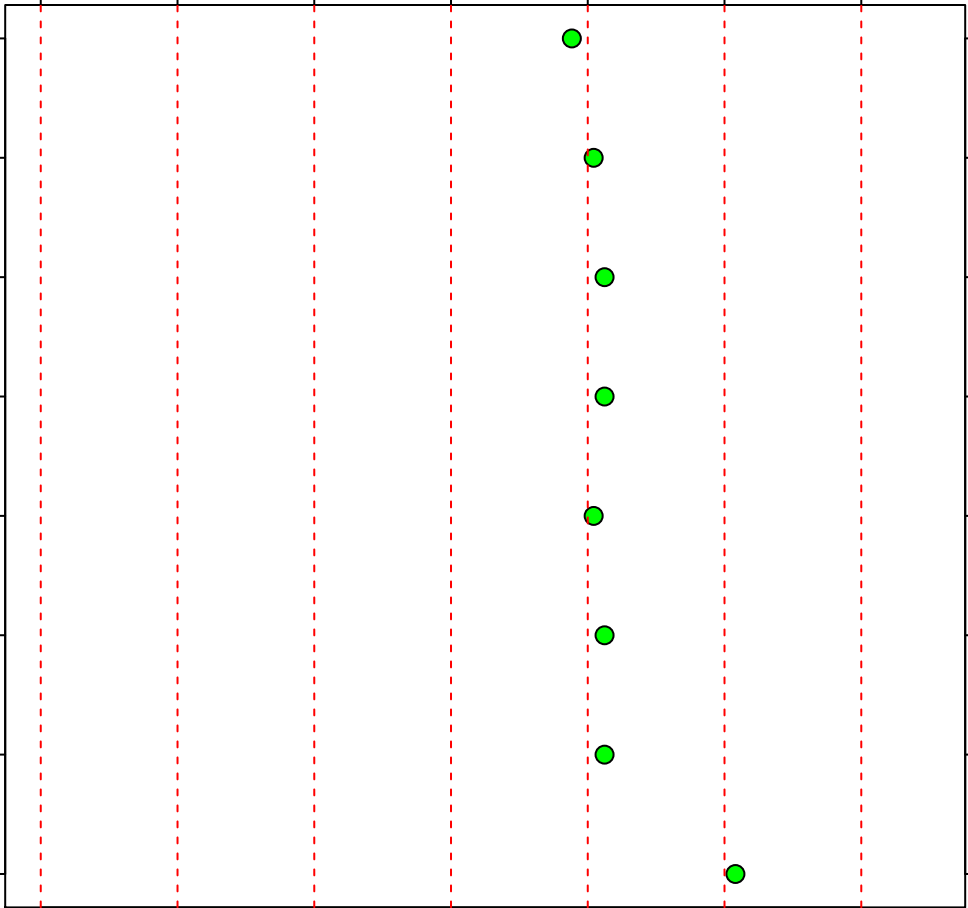

# Patient\_08 D2cc bladder

'phantom least similar to TG43'

- D(Y, N, B, B)
- D(Y, N, B, N)
- D(Y, N, B, M)
- D(N, N, N, N)
- D(Y, N, N, N)
- D(Y, N, M, M)
- D(Y, M, X, X)
- D(N, M, X, X)

'phantom most similar to TG43'

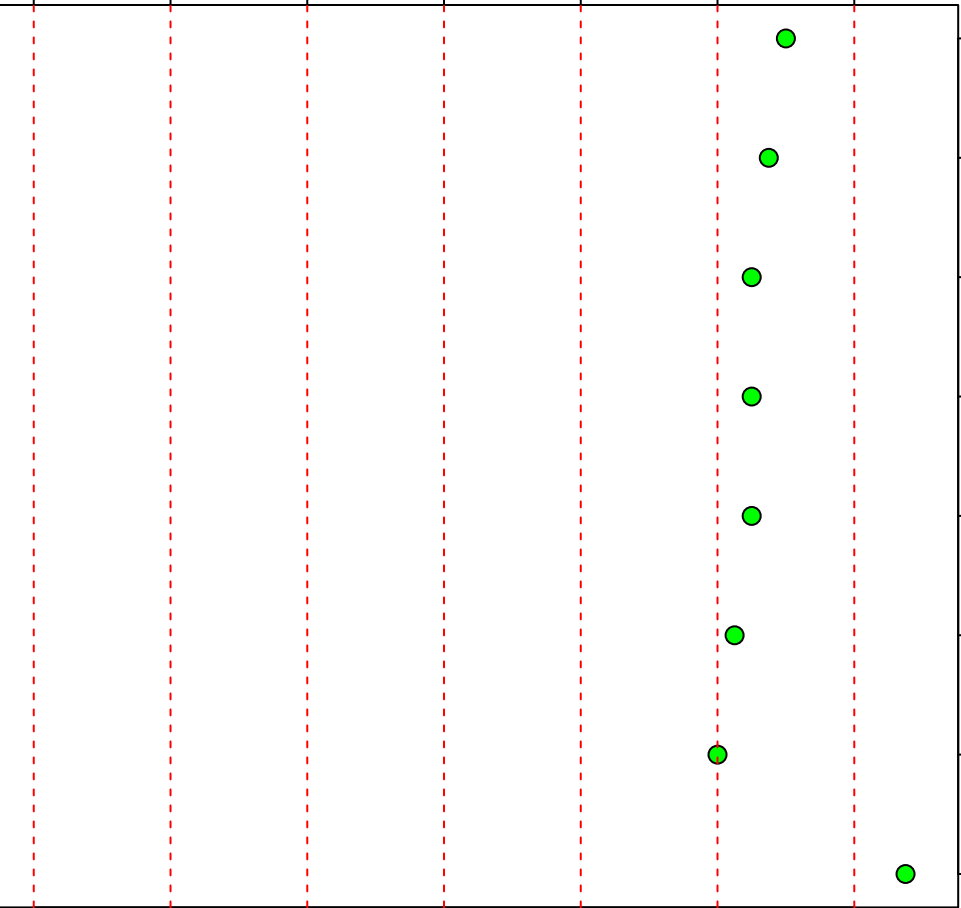

%diff 100\*(GBBS-TG43)/TG43

GBBS(solid model applicator, body, balloon & rectal contrast, packing contrast)

# Patient\_09 D2cc bladder

'phantom least similar to TG43'

D(Y, N, B, B)

D(Y, N, B, N)

D(Y, N, B, M)

D(N, N, N, N)

D(Y, N, N, N)

D(Y, N, M, M)

D(Y, M, X, X)

D(N, M, X, X)

'phantom most similar to TG43'

-10 -8 -6 -4 -2 0 2

%diff 100\*(GBBS-TG43)/TG43

GBBS(solid model applicator, body, balloon & rectal contrast, packing contrast)

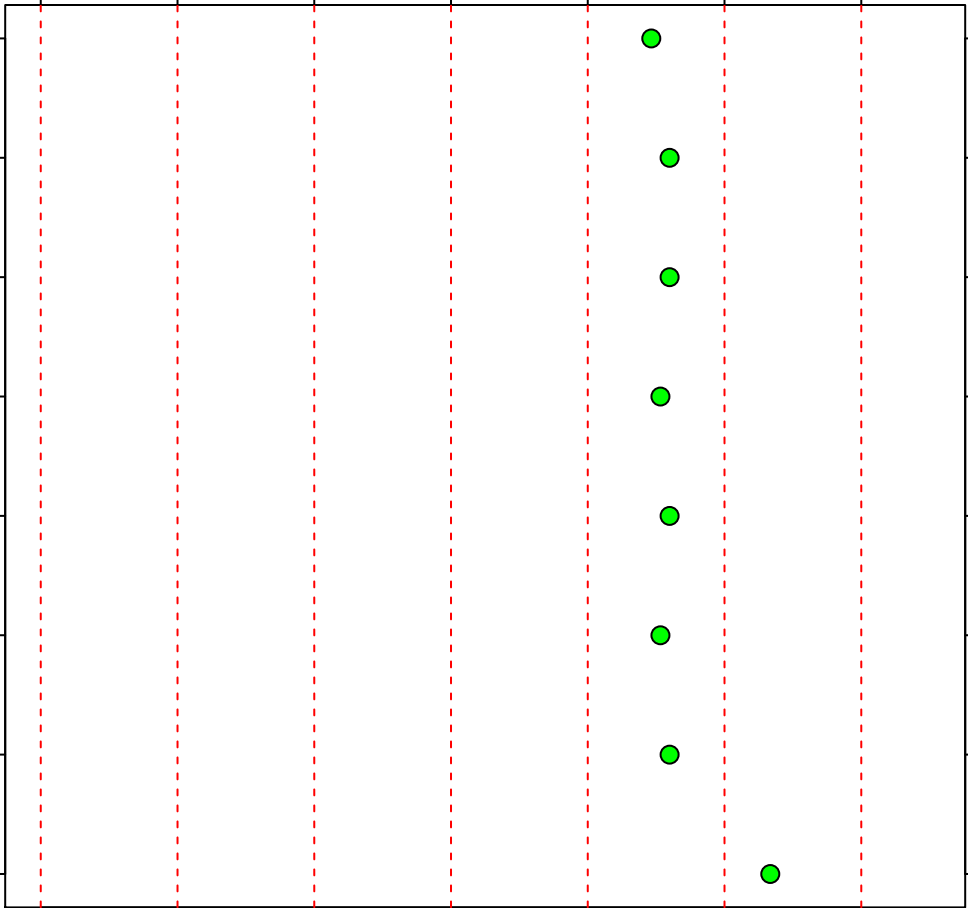

# Patient\_10 D2cc bladder

'phantom least similar to TG43'

D(Y, N, B, B)

D(Y, N, B, N)

D(Y, N, B, M)

D(N, N, N, N)

D(Y, N, N, N)

D(Y, N, M, M)

D(Y, M, X, X)

D(N, M, X, X)

'phantom most similar to TG43'

-10 -8 -6 -4 -2 0 2

%diff 100\*(GBBS-TG43)/TG43

GBBS(solid model applicator, body, balloon & rectal contrast, packing contrast)

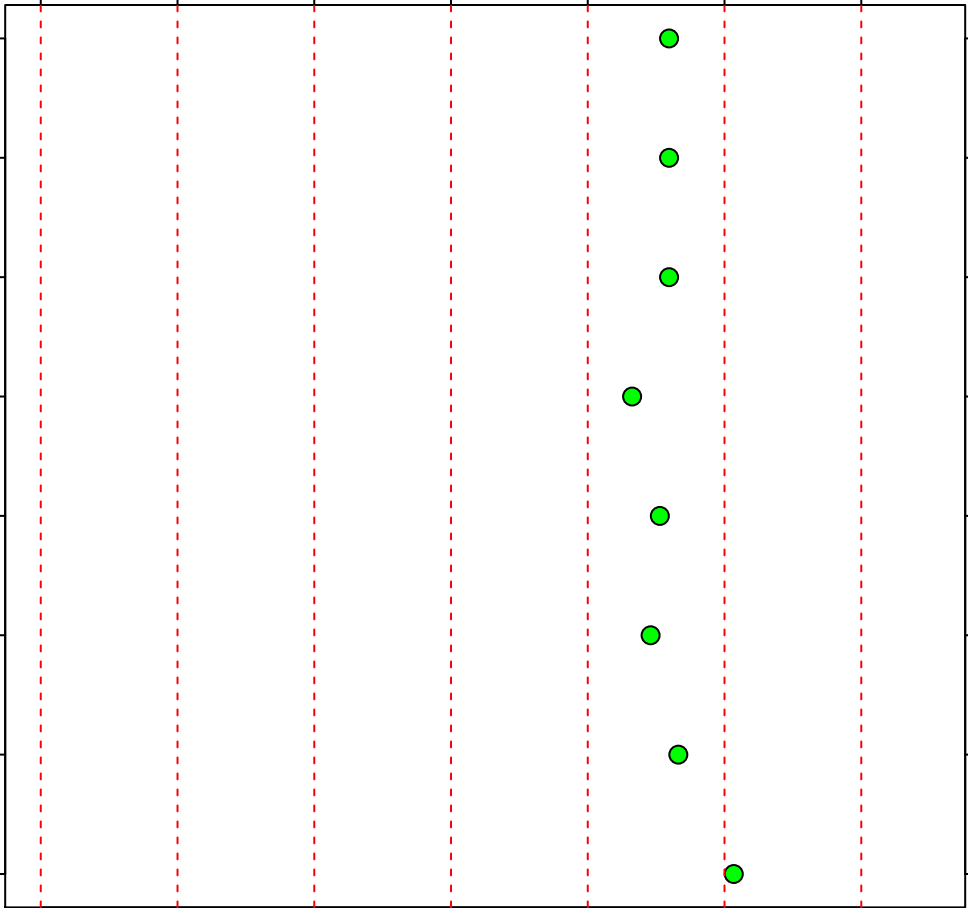

# Patient\_11 D2cc bladder

'phantom least similar to TG43'

D(Y, N, B, B)

D(Y, N, B, N)

D(Y, N, B, M)

D(N, N, N, N)

D(Y, N, N, N)

D(Y, N, M, M)

D(Y, M, X, X)

D(N, M, X, X)

'phantom most similar to TG43'

-10 -8 -6 -4 -2 0 2

%diff 100\*(GBBS-TG43)/TG43

GBBS(solid model applicator, body, balloon & rectal contrast, packing contrast)

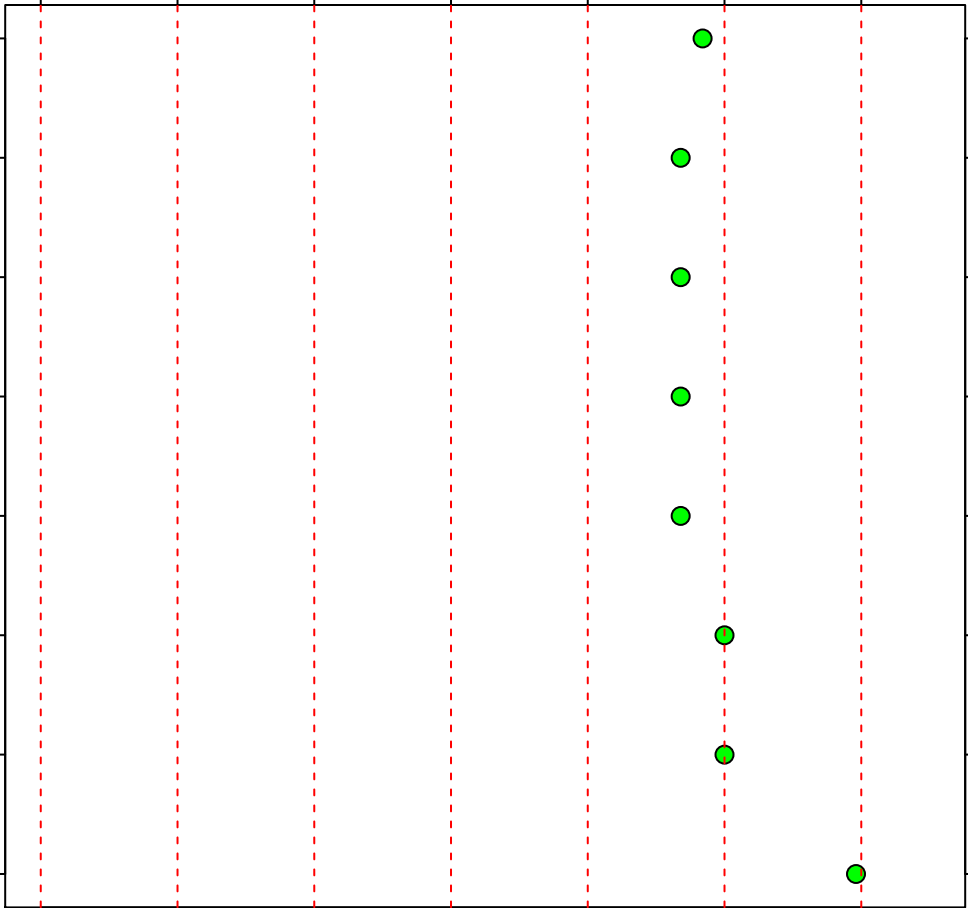



# Patient\_12 D2cc bladder

'phantom least similar to TG43'

D(Y, N, B, B)

D(Y, N, B, N)

D(Y, N, B, M)

D(N, N, N, N)

D(Y, N, N, N)

D(Y, N, M, M)

D(Y, M, X, X)

D(N, M, X, X)

'phantom most similar to TG43'

-10

-8

-6

-4

-2

0

2

%diff 100\*(GBBS-TG43)/TG43

GBBS(solid model applicator, body, balloon & rectal contrast, packing contrast)

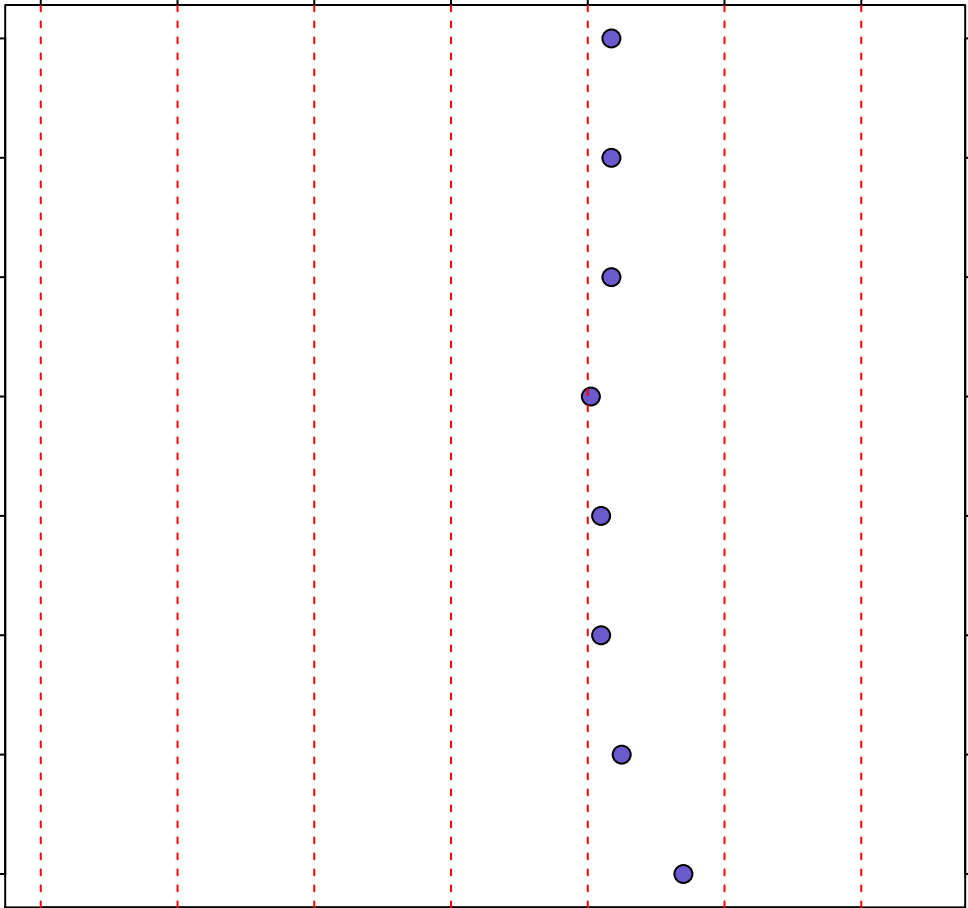

# Patient\_13 D2cc bladder

'phantom least similar to TG43'

- D(Y, N, B, B)
- D(Y, N, B, N)
- D(Y, N, B, M)
- D(N, N, N, N)
- D(Y, N, N, N)
- D(Y, N, M, M)
- D(Y, M, X, X)
- D(N, M, X, X)

'phantom most similar to TG43'

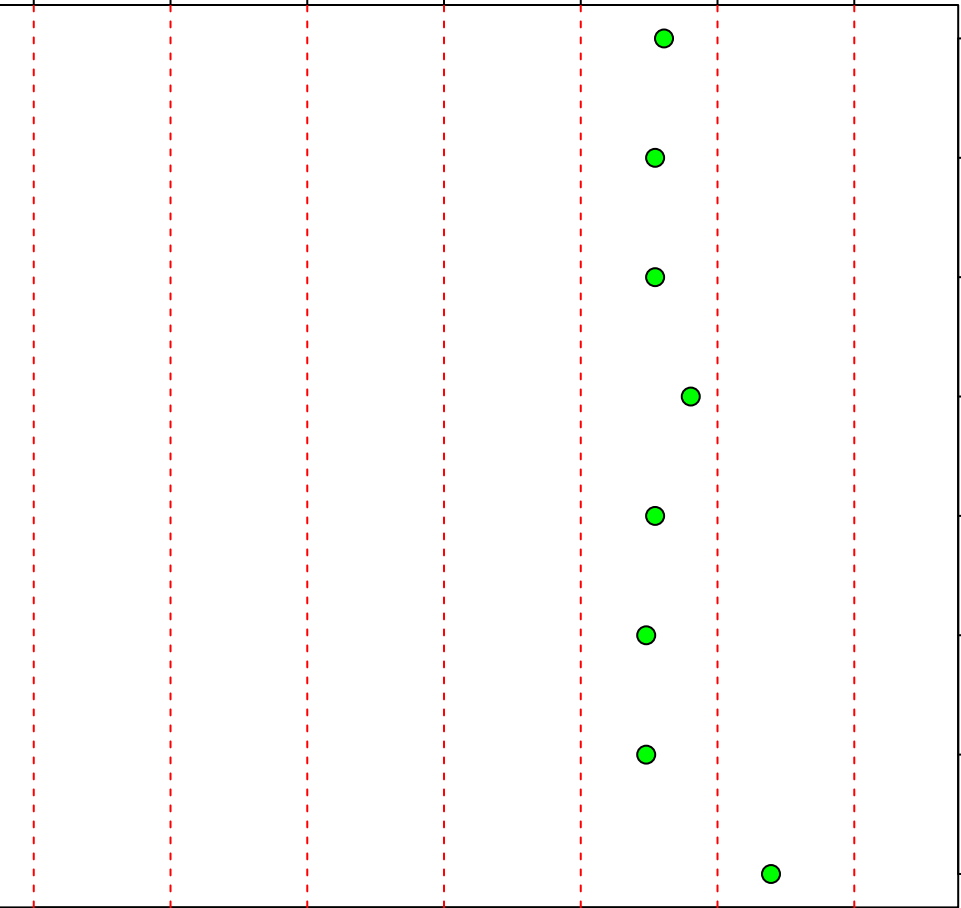

%diff 100\*(GBBS-TG43)/TG43

GBBS(solid model applicator, body, balloon & rectal contrast, packing contrast)

# Patient\_14 D2cc bladder

'phantom least similar to TG43'

D(Y, N, B, B)

D(Y, N, B, N)

D(Y, N, B, M)

D(N, N, N, N)

D(Y, N, N, N)

D(Y, N, M, M)

D(Y, M, X, X)

D(N, M, X, X)

'phantom most similar to TG43'

-10

-8

-6

-4

-2

0

2

%diff 100\*(GBBS-TG43)/TG43

GBBS(solid model applicator, body, balloon & rectal contrast, packing contrast)

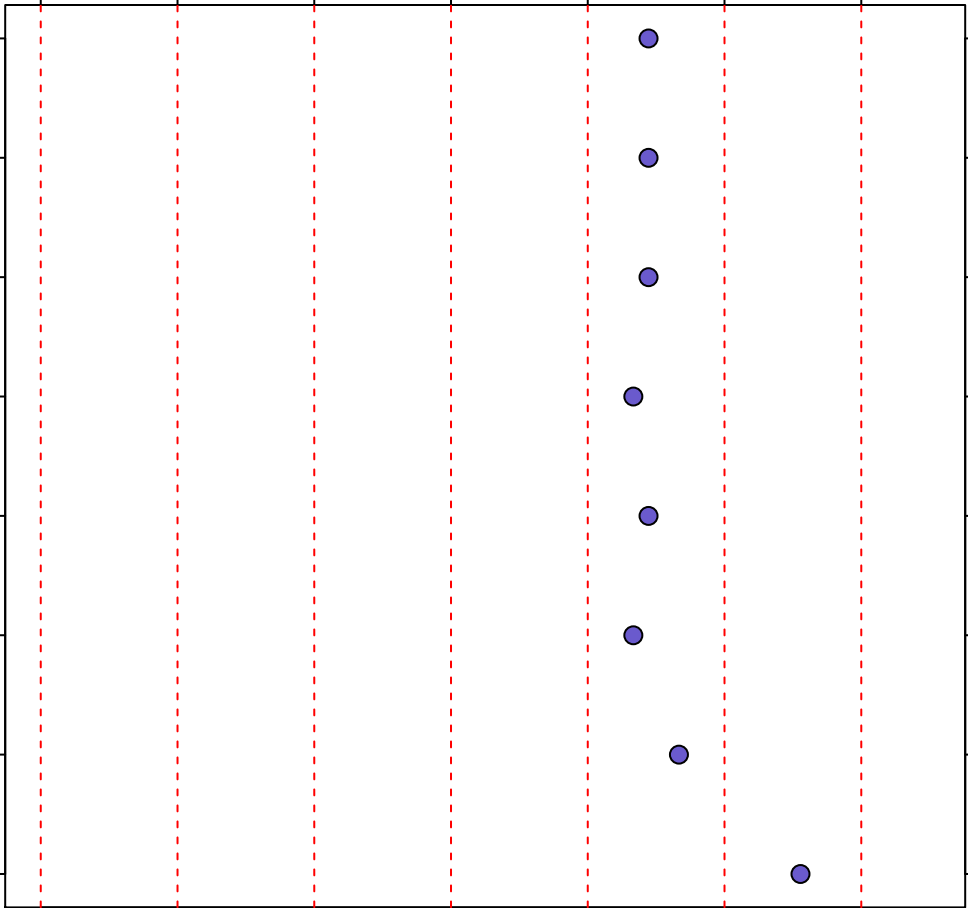

# Patient\_15 D2cc bladder

'phantom least similar to TG43'

D(Y, N, B, B)

D(Y, N, B, N)

D(Y, N, B, M)

D(N, N, N, N)

D(Y, N, N, N)

D(Y, N, M, M)

D(Y, M, X, X)

D(N, M, X, X)

'phantom most similar to TG43'

-10 -8 -6 -4 -2 0 2

%diff 100\*(GBBS-TG43)/TG43

GBBS(solid model applicator, body, balloon & rectal contrast, packing contrast)

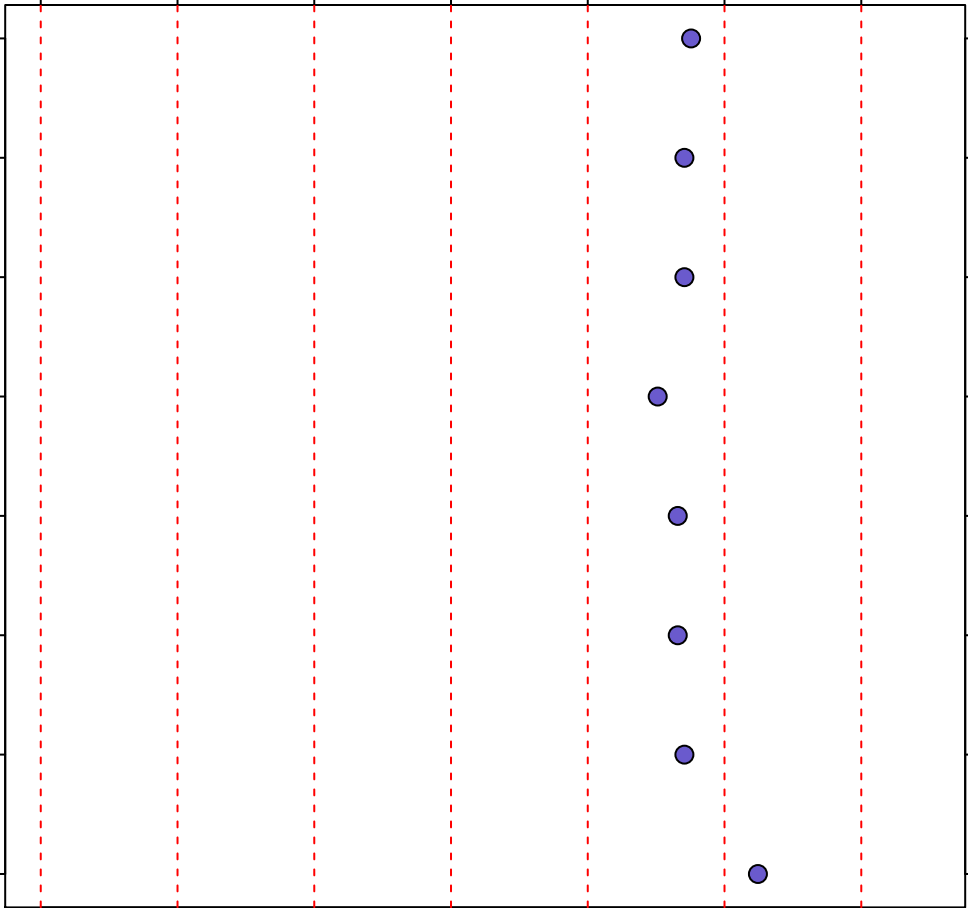

# Patient\_16 D2cc bladder

'phantom least similar to TG43'

D(Y, N, B, B)

D(Y, N, B, N)

D(Y, N, B, M)

D(N, N, N, N)

D(Y, N, N, N)

D(Y, N, M, M)

D(Y, M, X, X)

D(N, M, X, X)

'phantom most similar to TG43'

-10 -8 -6 -4 -2 0 2

%diff 100\*(GBBS-TG43)/TG43

GBBS(solid model applicator, body, balloon & rectal contrast, packing contrast)

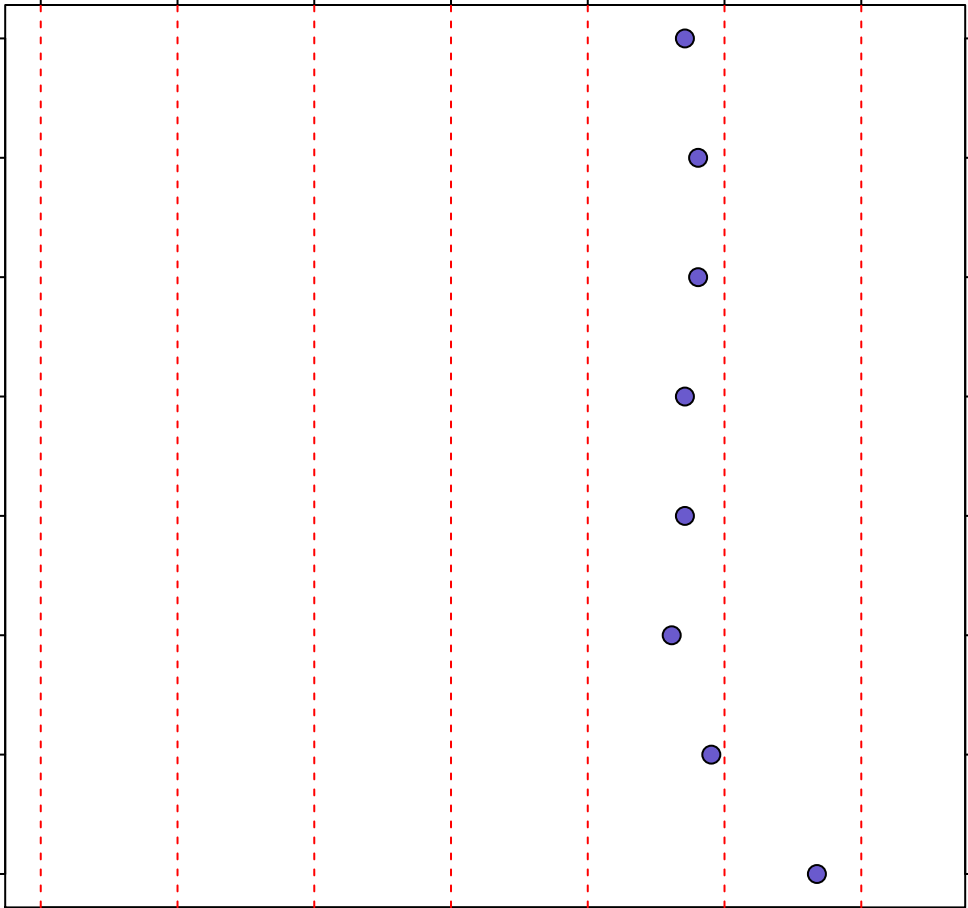

# Patient\_17 D2cc bladder

'phantom least similar to TG43'

D(Y, N, B, B)

D(Y, N, B, N)

D(Y, N, B, M)

D(N, N, N, N)

D(Y, N, N, N)

D(Y, N, M, M)

D(Y, M, X, X)

D(N, M, X, X)

'phantom most similar to TG43'

-10 -8 -6 -4 -2 0 2

%diff 100\*(GBBS-TG43)/TG43

GBBS(solid model applicator, body, balloon & rectal contrast, packing contrast)

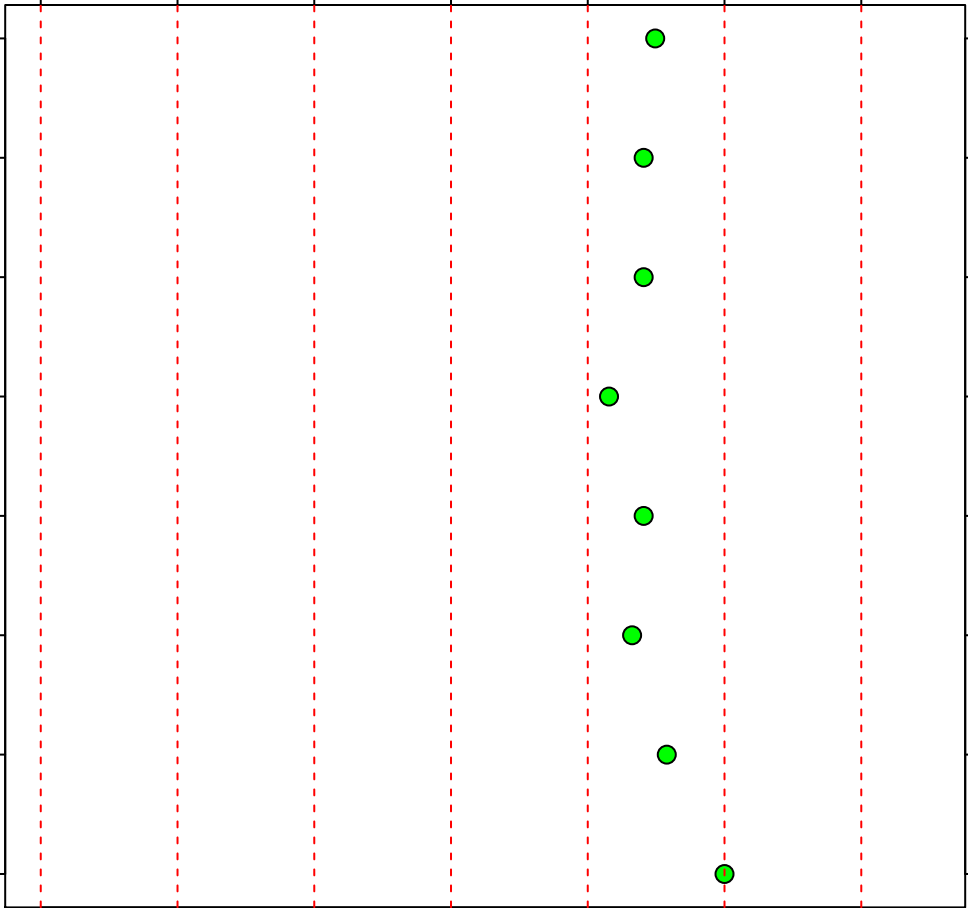

# Patient\_18 D2cc bladder

'phantom least similar to TG43'

D(Y, N, B, B)

D(Y, N, B, N)

D(Y, N, B, M)

D(N, N, N, N)

D(Y, N, N, N)

D(Y, N, M, M)

D(Y, M, X, X)

D(N, M, X, X)

'phantom most similar to TG43'

-10

-8

-6

-4

-2

0

2

%diff 100\*(GBBS-TG43)/TG43

GBBS(solid model applicator, body, balloon & rectal contrast, packing contrast)

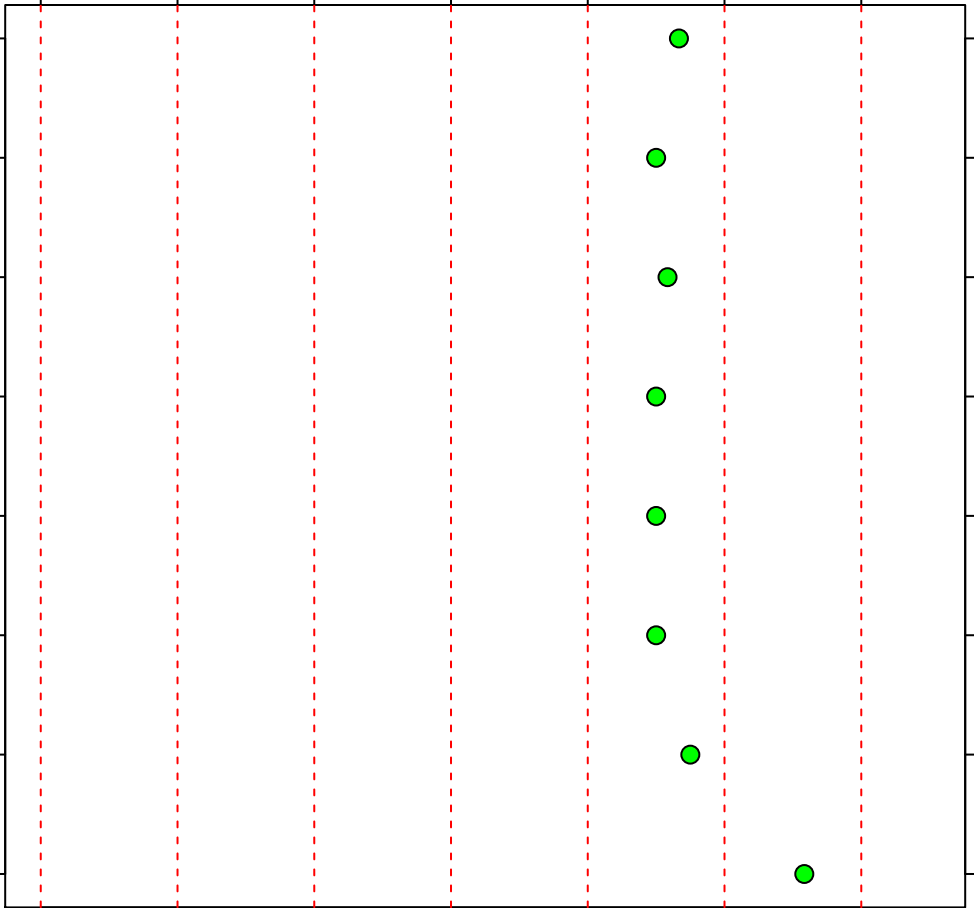

# Patient\_19 D2cc bladder

'phantom least similar to TG43'

D(Y, N, B, B)

D(Y, N, B, N)

D(Y, N, B, M)

D(N, N, N, N)

D(Y, N, N, N)

D(Y, N, M, M)

D(Y, M, X, X)

D(N, M, X, X)

'phantom most similar to TG43'

-10 -8 -6 -4 -2 0 2

%diff 100\*(GBBS-TG43)/TG43

GBBS(solid model applicator, body, balloon & rectal contrast, packing contrast)

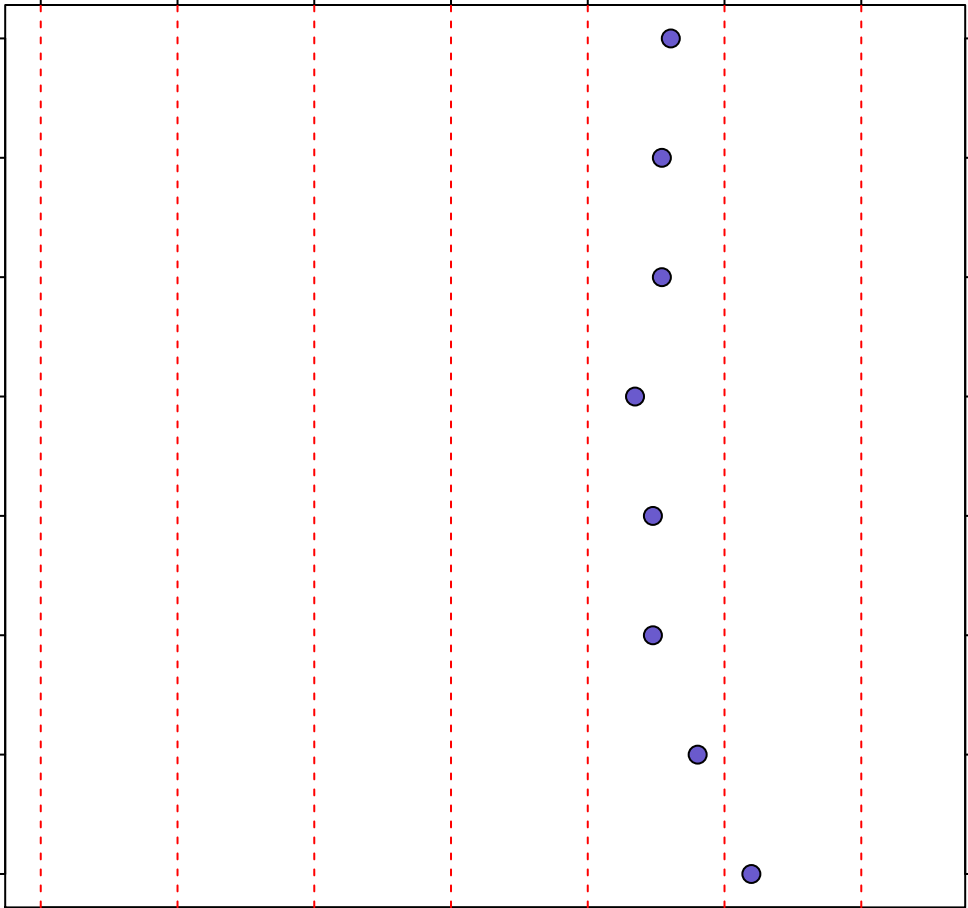



# Patient\_20 D2cc bladder

'phantom least similar to TG43'

D(Y, N, B, B)

D(Y, N, B, N)

D(Y, N, B, M)

D(N, N, N, N)

D(Y, N, N, N)

D(Y, N, M, M)

D(Y, M, X, X)

D(N, M, X, X)

'phantom most similar to TG43'



%diff 100\*(GBBS-TG43)/TG43

GBBS(solid model applicator, body, balloon & rectal contrast, packing contrast)

# Patient\_21 D2cc bladder

'phantom least similar to TG43'

D(Y, N, B, B)

D(Y, N, B, N)

D(Y, N, B, M)

D(N, N, N, N)

D(Y, N, N, N)

D(Y, N, M, M)

D(Y, M, X, X)

D(N, M, X, X)

'phantom most similar to TG43'

-10 -8 -6 -4 -2 0 2

%diff 100\*(GBBS-TG43)/TG43

GBBS(solid model applicator, body, balloon & rectal contrast, packing contrast)

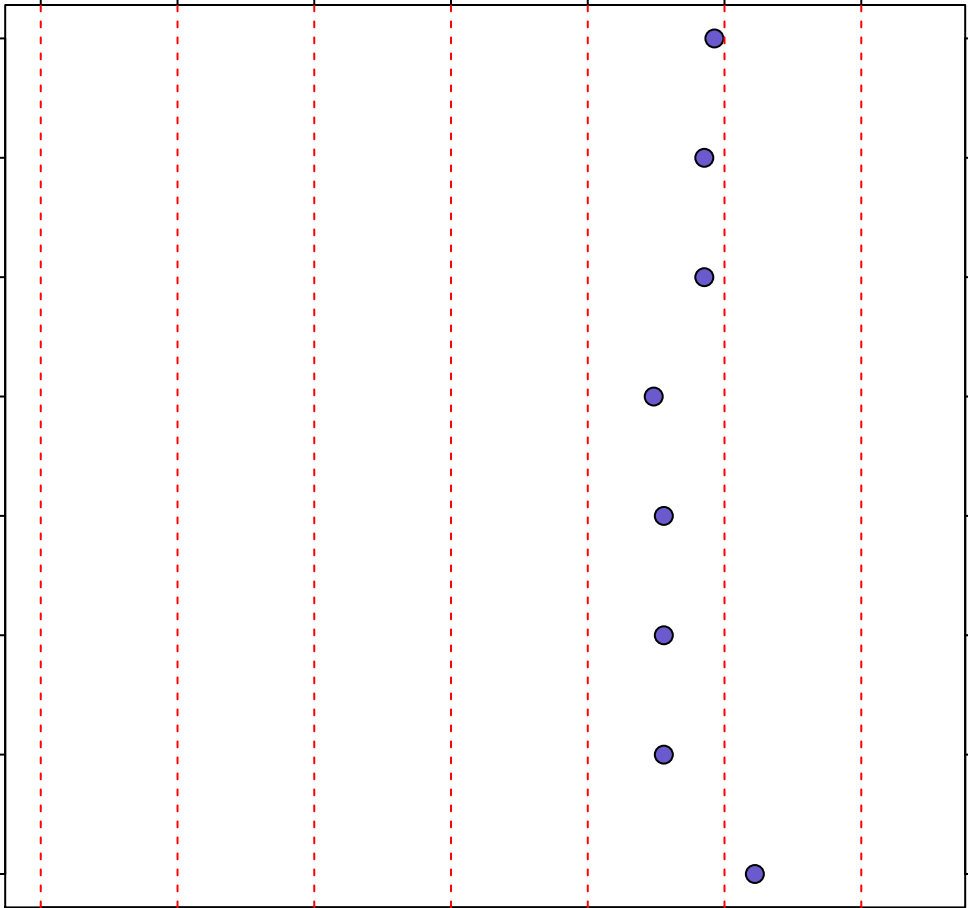

# Patient\_22 D2cc bladder

'phantom least similar to TG43'

D(Y, N, B, B)

D(Y, N, B, N)

D(Y, N, B, M)

D(N, N, N, N)

D(Y, N, N, N)

D(Y, N, M, M)

D(Y, M, X, X)

D(N, M, X, X)

'phantom most similar to TG43'

-10 -8 -6 -4 -2 0 2

%diff 100\*(GBBS-TG43)/TG43

GBBS(solid model applicator, body, balloon & rectal contrast, packing contrast)

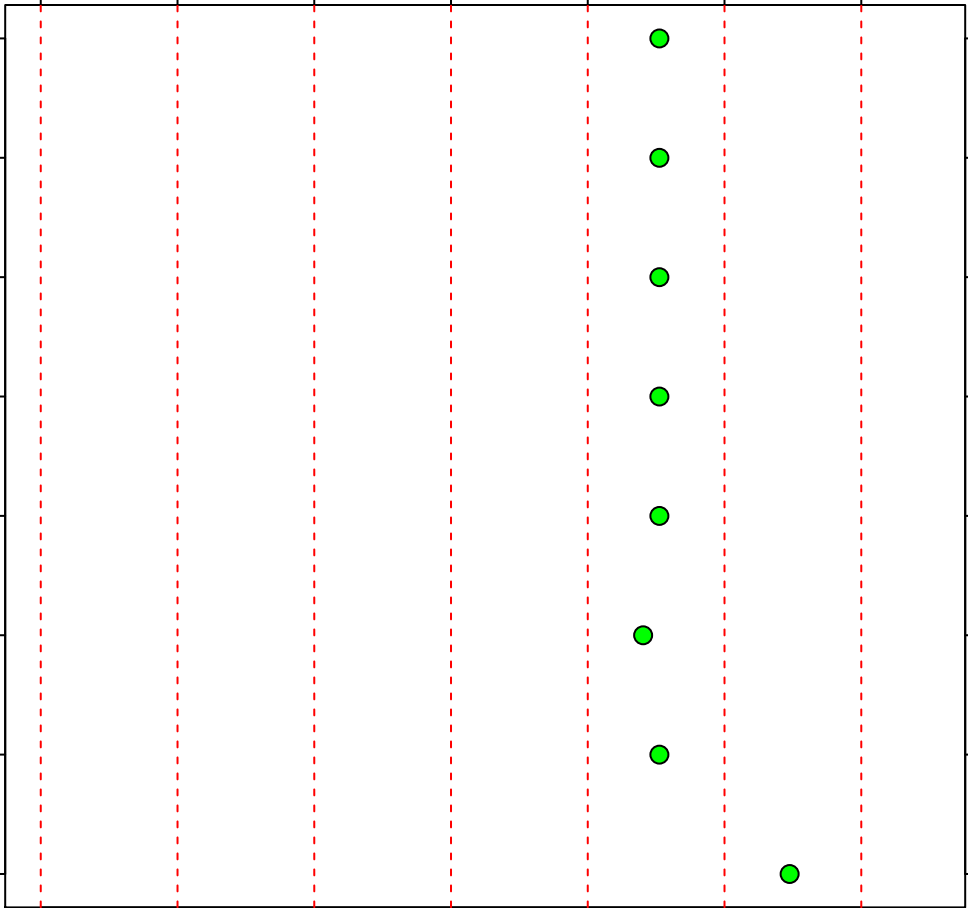

# Patient\_23 D2cc bladder

'phantom least similar to TG43'

D(Y, N, B, B)

D(Y, N, B, N)

D(Y, N, B, M)

D(N, N, N, N)

D(Y, N, N, N)

D(Y, N, M, M)

D(Y, M, X, X)

D(N, M, X, X)

'phantom most similar to TG43'

-10

-8

-6

-4

-2

0

2

%diff 100\*(GBBS-TG43)/TG43

GBBS(solid model applicator, body, balloon & rectal contrast, packing contrast)

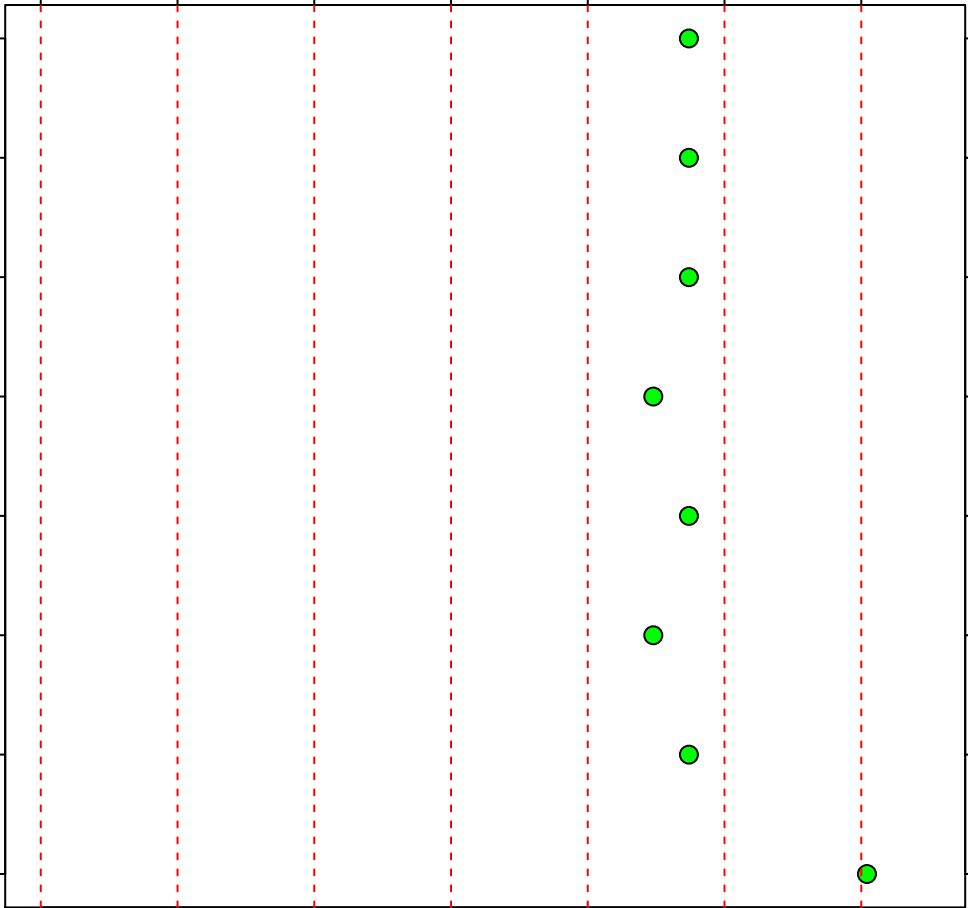

# Patient\_24 D2cc bladder

'phantom least similar to TG43'

- D(Y, N, B, B)
- D(Y, N, B, N)
- D(Y, N, B, M)
- D(N, N, N, N)
- D(Y, N, N, N)
- D(Y, N, M, M)
- D(Y, M, X, X)
- D(N, M, X, X)

'phantom most similar to TG43'

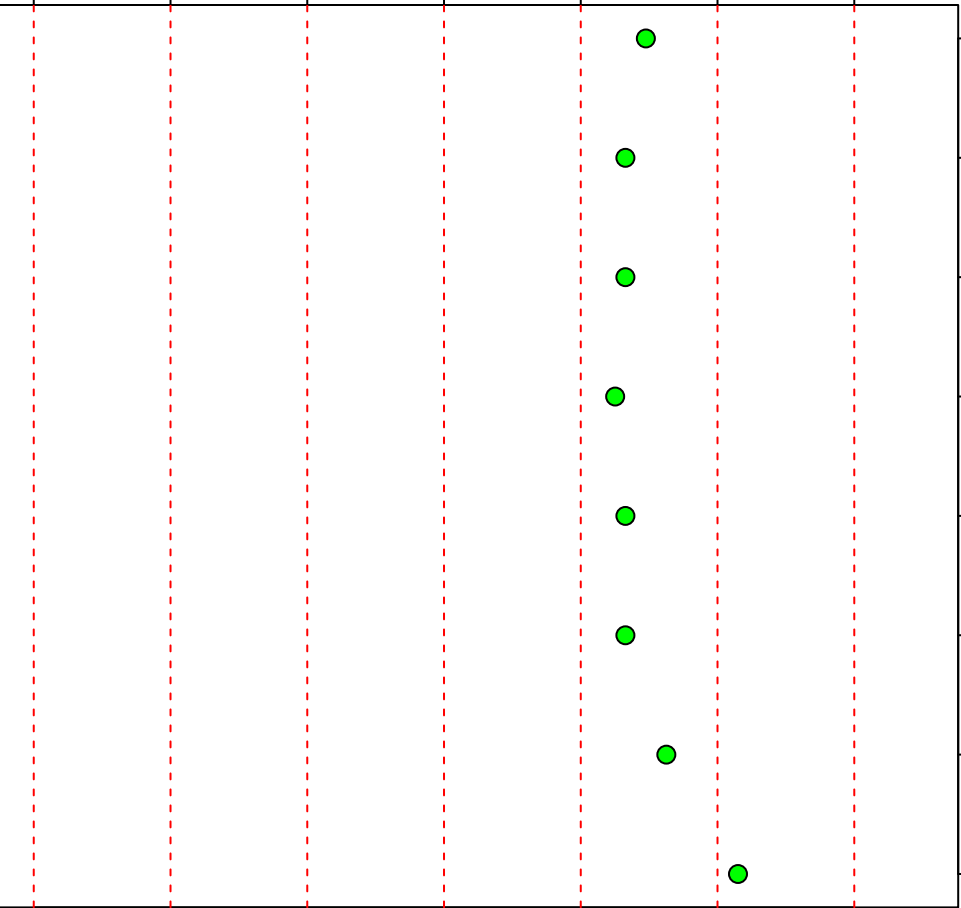

-10 -8 -6 -4 -2 0 2

%diff 100\*(GBBS-TG43)/TG43

GBBS(solid model applicator, body, balloon & rectal contrast, packing contrast)

# Patient\_25 D2cc bladder

'phantom least similar to TG43'

D(Y, N, B, B)

D(Y, N, B, N)

D(Y, N, B, M)

D(N, N, N, N)

D(Y, N, N, N)

D(Y, N, M, M)

D(Y, M, X, X)

D(N, M, X, X)

'phantom most similar to TG43'

-10 -8 -6 -4 -2 0 2

%diff 100\*(GBBS-TG43)/TG43

GBBS(solid model applicator, body, balloon & rectal contrast, packing contrast)

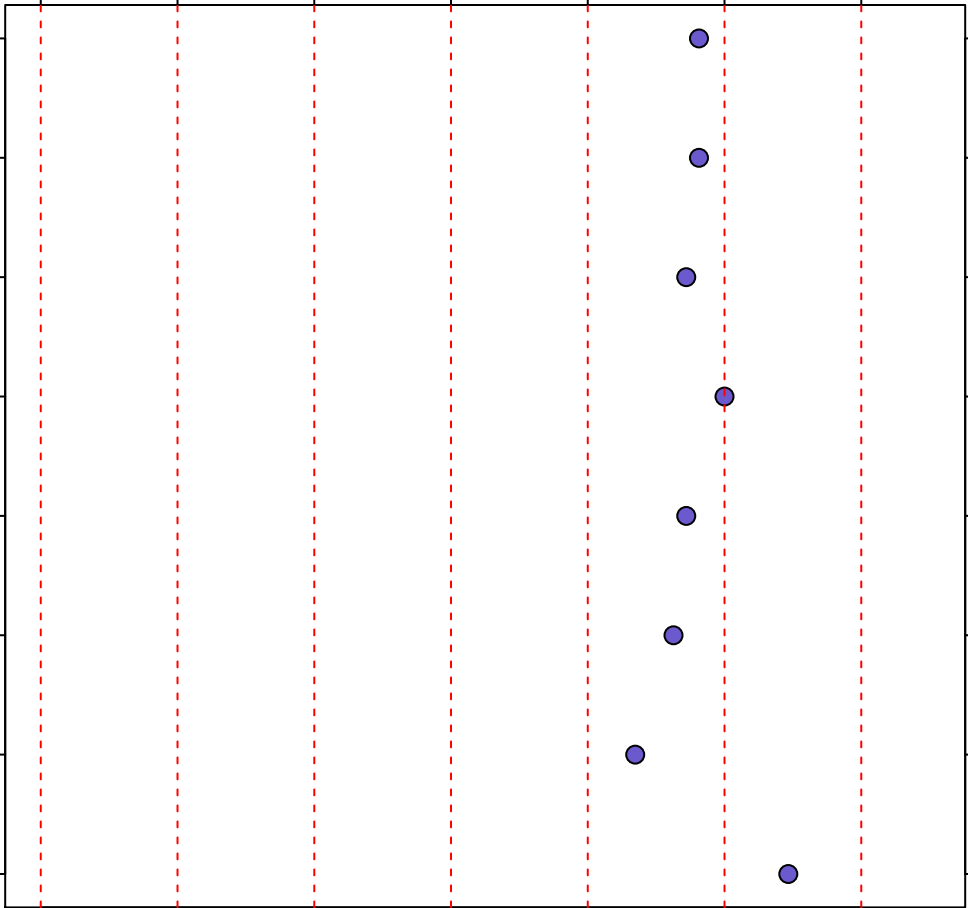

# Patient\_26 D2cc bladder

'phantom least similar to TG43'

D(Y, N, B, B)

D(Y, N, B, N)

D(Y, N, B, M)

D(N, N, N, N)

D(Y, N, N, N)

D(Y, N, M, M)

D(Y, M, X, X)

D(N, M, X, X)

'phantom most similar to TG43'

-10 -8 -6 -4 -2 0 2

%diff 100\*(GBBS-TG43)/TG43

GBBS(solid model applicator, body, balloon & rectal contrast, packing contrast)

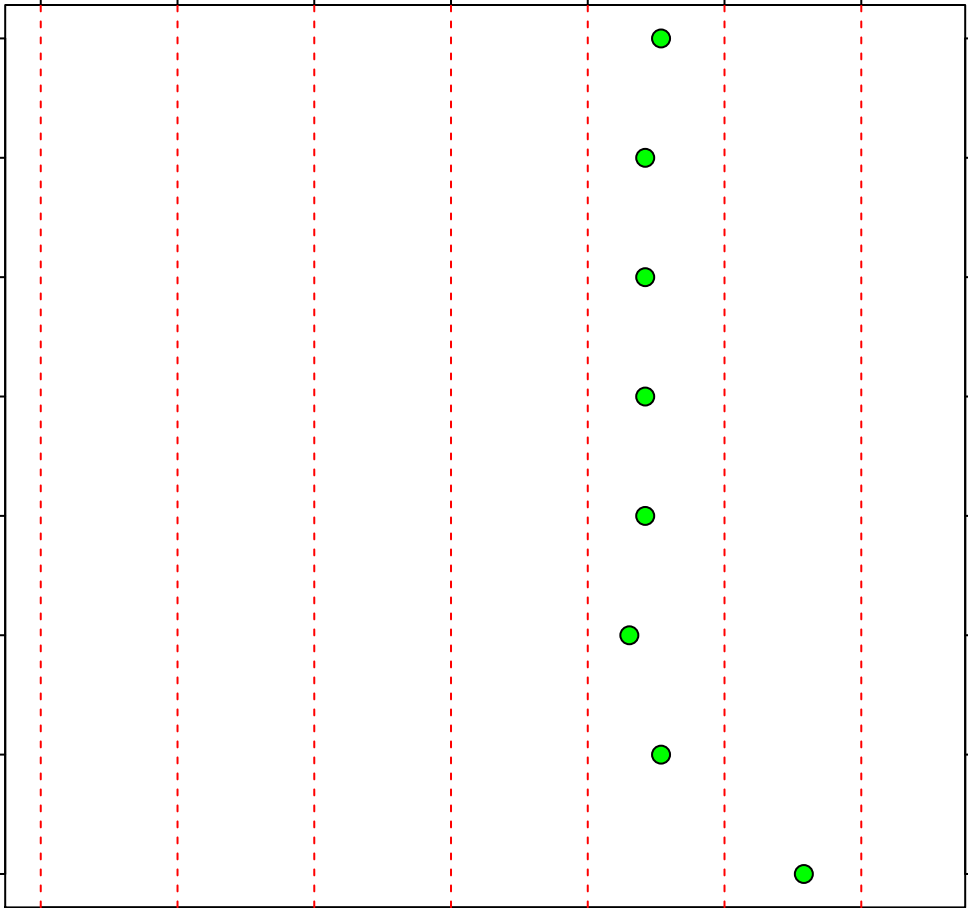

# Patient\_01 D2cc rectum

'phantom least similar to TG43'

D(Y, N, B, B)

D(Y, N, B, N)

D(Y, N, B, M)

D(N, N, N, N)

D(Y, N, N, N)

D(Y, N, M, M)

D(Y, M, X, X)

D(N, M, X, X)

'phantom most similar to TG43'

-10 -8 -6 -4 -2 0 2

%diff 100\*(GBBS-TG43)/TG43

GBBS(solid model applicator, body, balloon & rectal contrast, packing contrast)

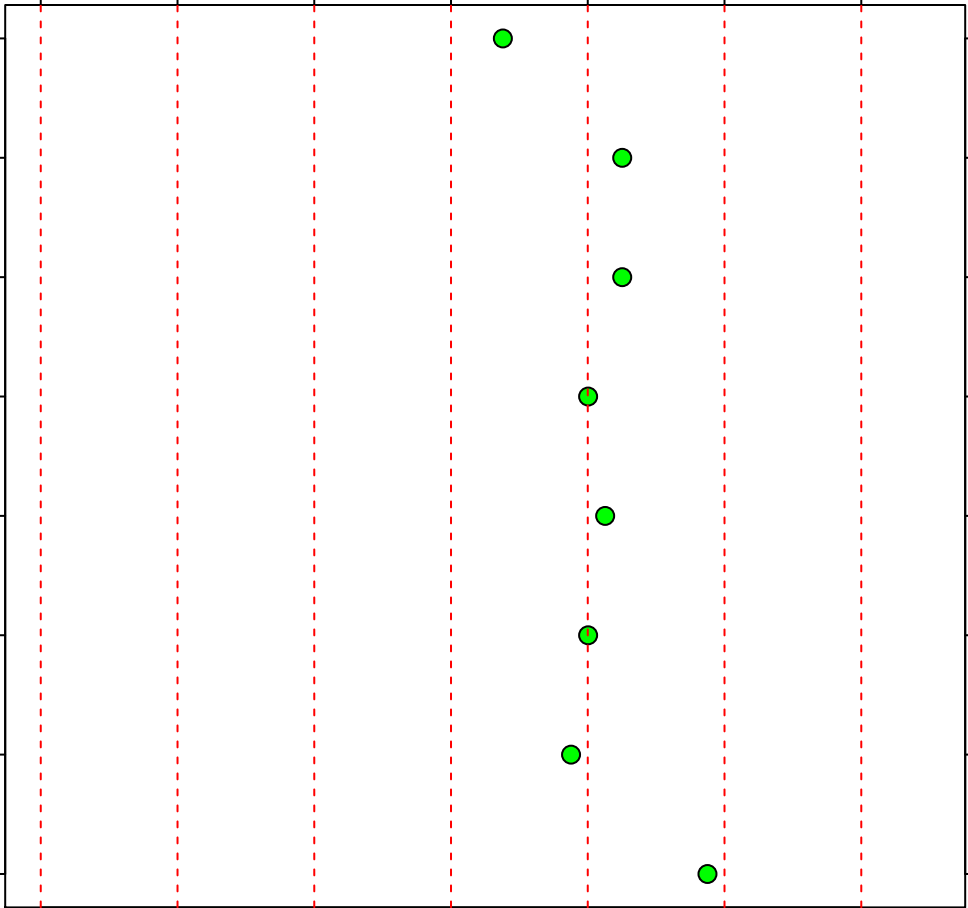



# Patient\_02 D2cc rectum

'phantom least similar to TG43'

- D(Y, N, B, B)
- D(Y, N, B, N)
- D(Y, N, B, M)
- D(N, N, N, N)
- D(Y, N, N, N)
- D(Y, N, M, M)
- D(Y, M, X, X)
- D(N, M, X, X)

'phantom most similar to TG43'

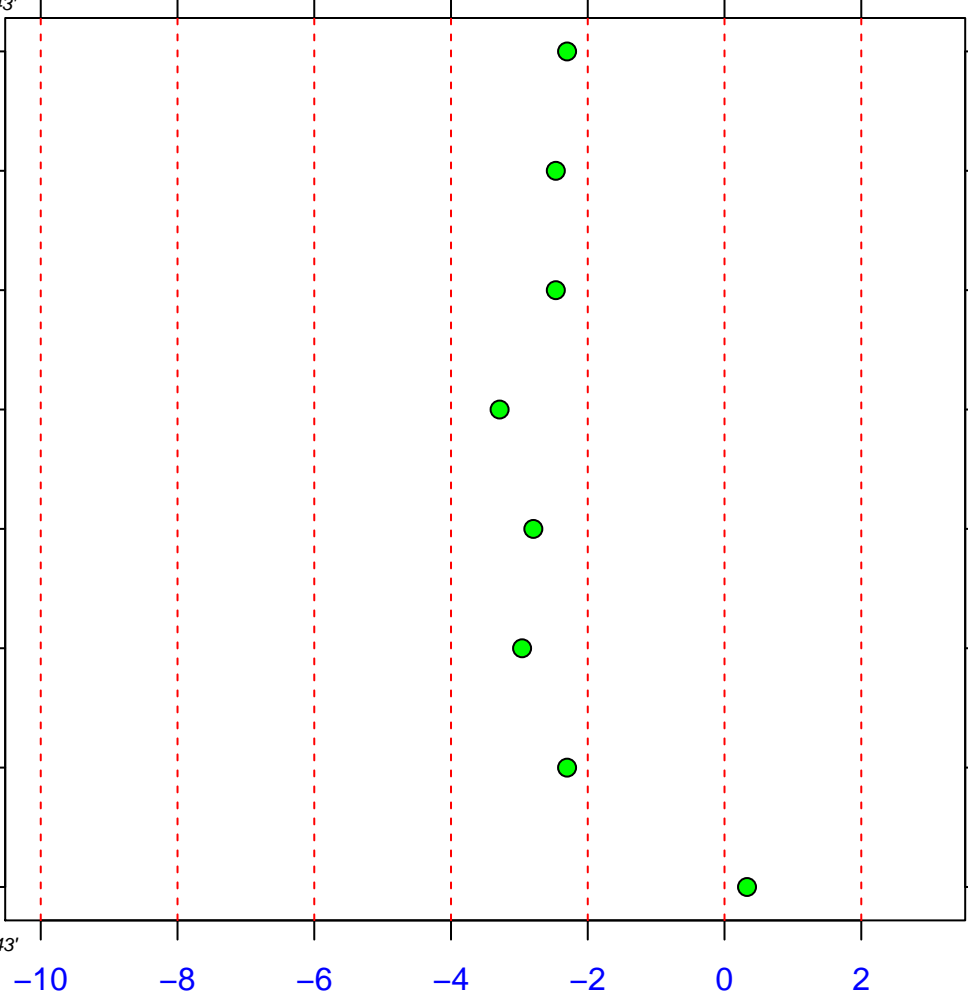

%diff 100\*(GBBS-TG43)/TG43

GBBS(solid model applicator, body, balloon & rectal contrast, packing contrast)

# Patient\_03 D2cc rectum

'phantom least similar to TG43'

D(Y, N, B, B)

D(Y, N, B, N)

D(Y, N, B, M)

D(N, N, N, N)

D(Y, N, N, N)

D(Y, N, M, M)

D(Y, M, X, X)

D(N, M, X, X)

'phantom most similar to TG43'

-10 -8 -6 -4 -2 0 2

%diff 100\*(GBBS-TG43)/TG43

GBBS(solid model applicator, body, balloon & rectal contrast, packing contrast)

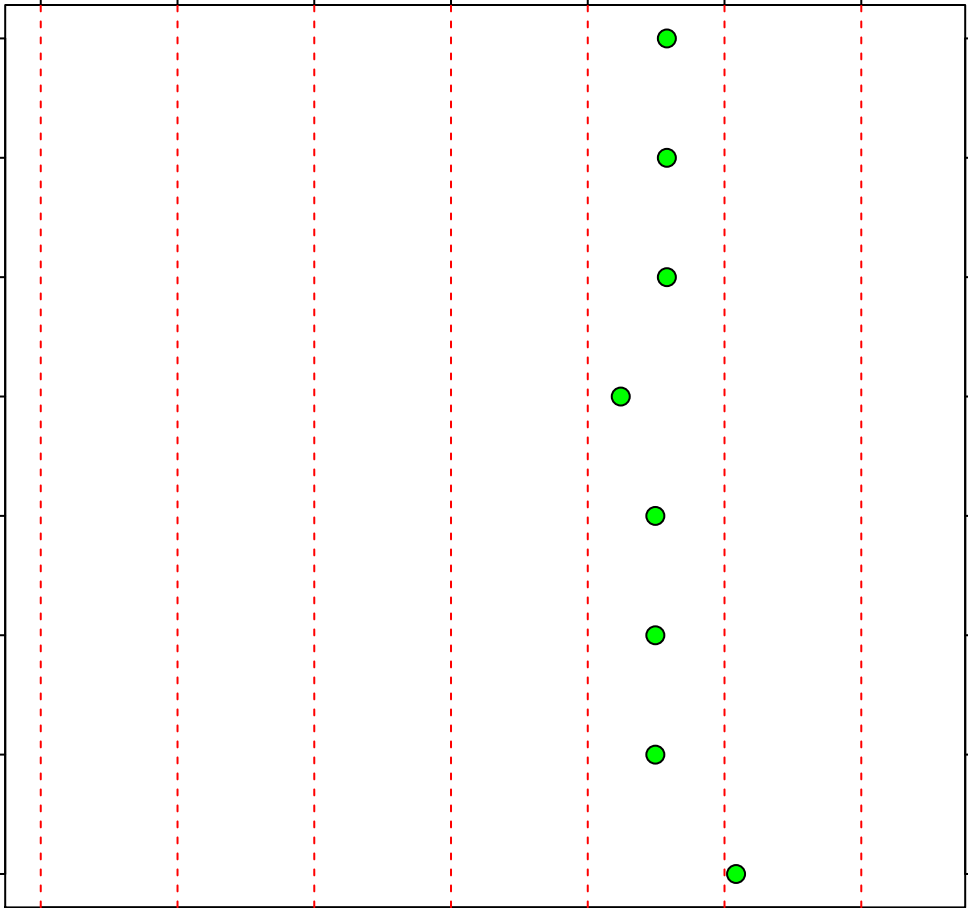

# Patient\_04 D2cc rectum

'phantom least similar to TG43'

D(Y, N, B, B)

D(Y, N, B, N)

D(Y, N, B, M)

D(N, N, N, N)

D(Y, N, N, N)

D(Y, N, M, M)

D(Y, M, X, X)

D(N, M, X, X)

'phantom most similar to TG43'

-10 -8 -6 -4 -2 0 2

%diff 100\*(GBBS-TG43)/TG43

GBBS(solid model applicator, body, balloon & rectal contrast, packing contrast)

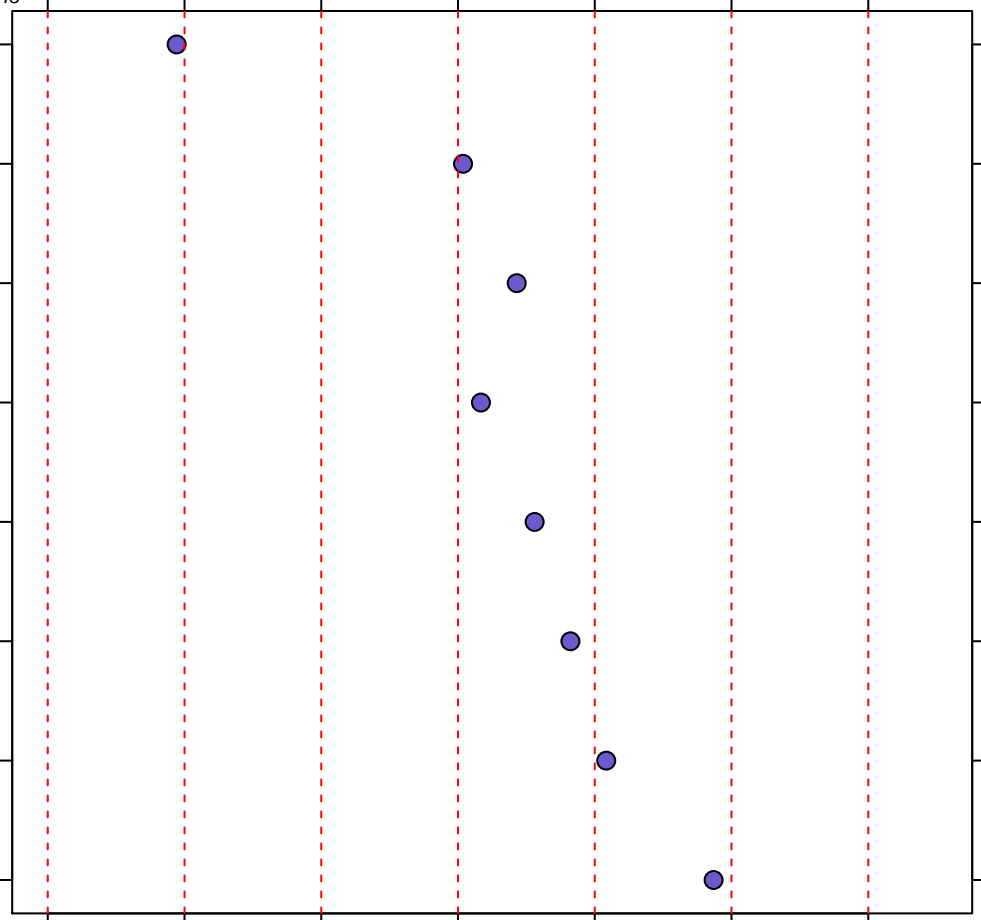

# Patient\_05 D2cc rectum

'phantom least similar to TG43'

- D(Y, N, B, B)
- D(Y, N, B, N)
- D(Y, N, B, M)
- D(N, N, N, N)
- D(Y, N, N, N)
- D(Y, N, M, M)
- D(Y, M, X, X)
- D(N, M, X, X)

'phantom most similar to TG43'

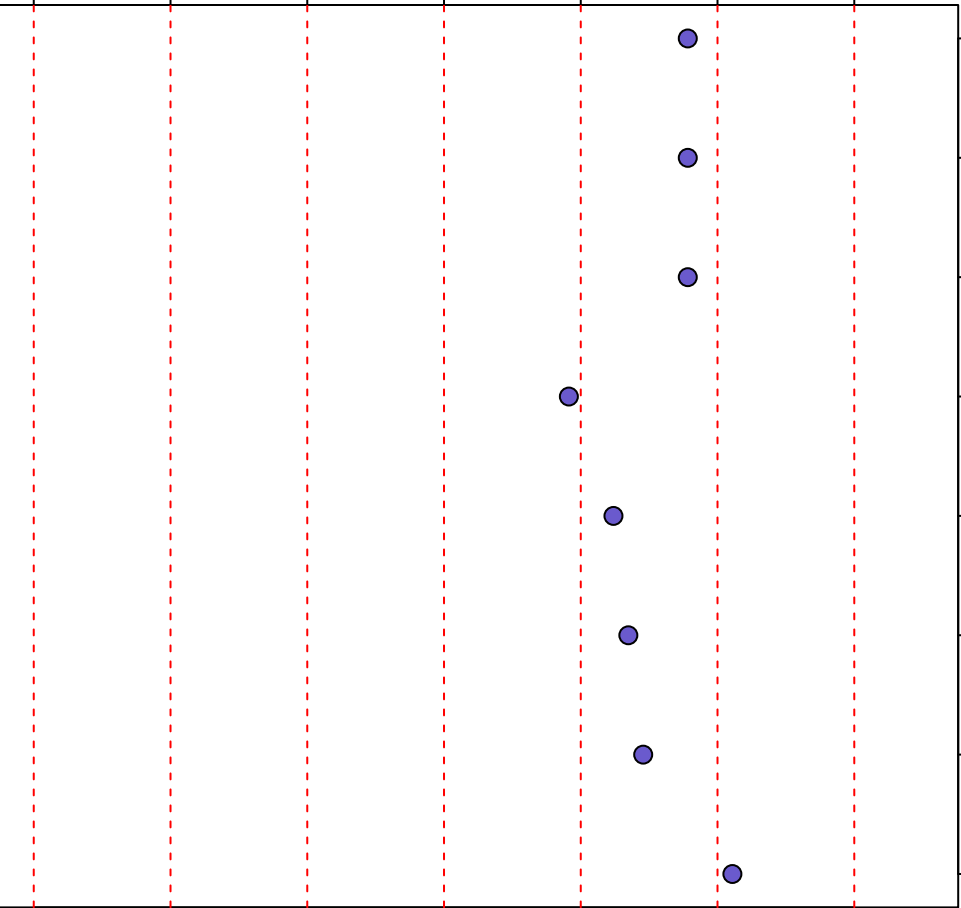

-10 -8 -6 -4 -2 0 2

%diff 100\*(GBBS-TG43)/TG43

GBBS(solid model applicator, body, balloon & rectal contrast, packing contrast)

# Patient\_06 D2cc rectum

'phantom least similar to TG43'

D(Y, N, B, B)

D(Y, N, B, N)

D(Y, N, B, M)

D(N, N, N, N)

D(Y, N, N, N)

D(Y, N, M, M)

D(Y, M, X, X)

D(N, M, X, X)

'phantom most similar to TG43'

-10 -8 -6 -4 -2 0 2

%diff 100\*(GBBS-TG43)/TG43

GBBS(solid model applicator, body, balloon & rectal contrast, packing contrast)

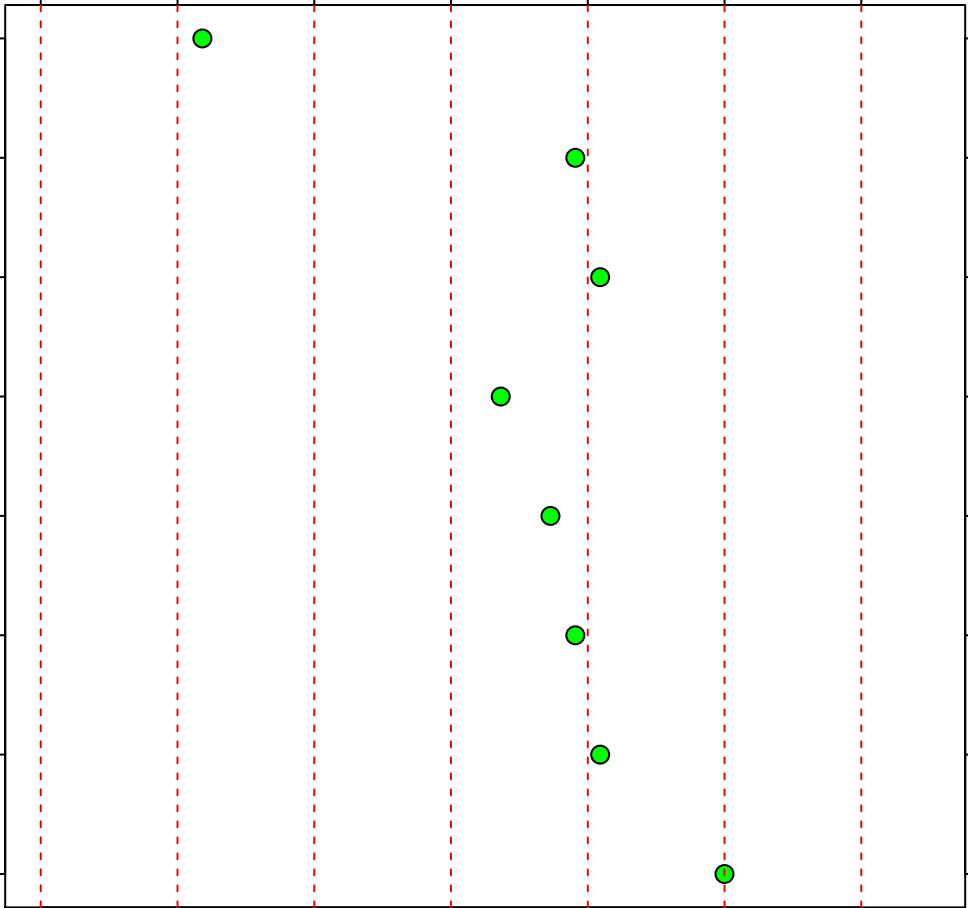

# Patient\_07 D2cc rectum

'phantom least similar to TG43'

- D(Y, N, B, B)
- D(Y, N, B, N)
- D(Y, N, B, M)
- D(N, N, N, N)
- D(Y, N, N, N)
- D(Y, N, M, M)
- D(Y, M, X, X)
- D(N, M, X, X)

'phantom most similar to TG43'

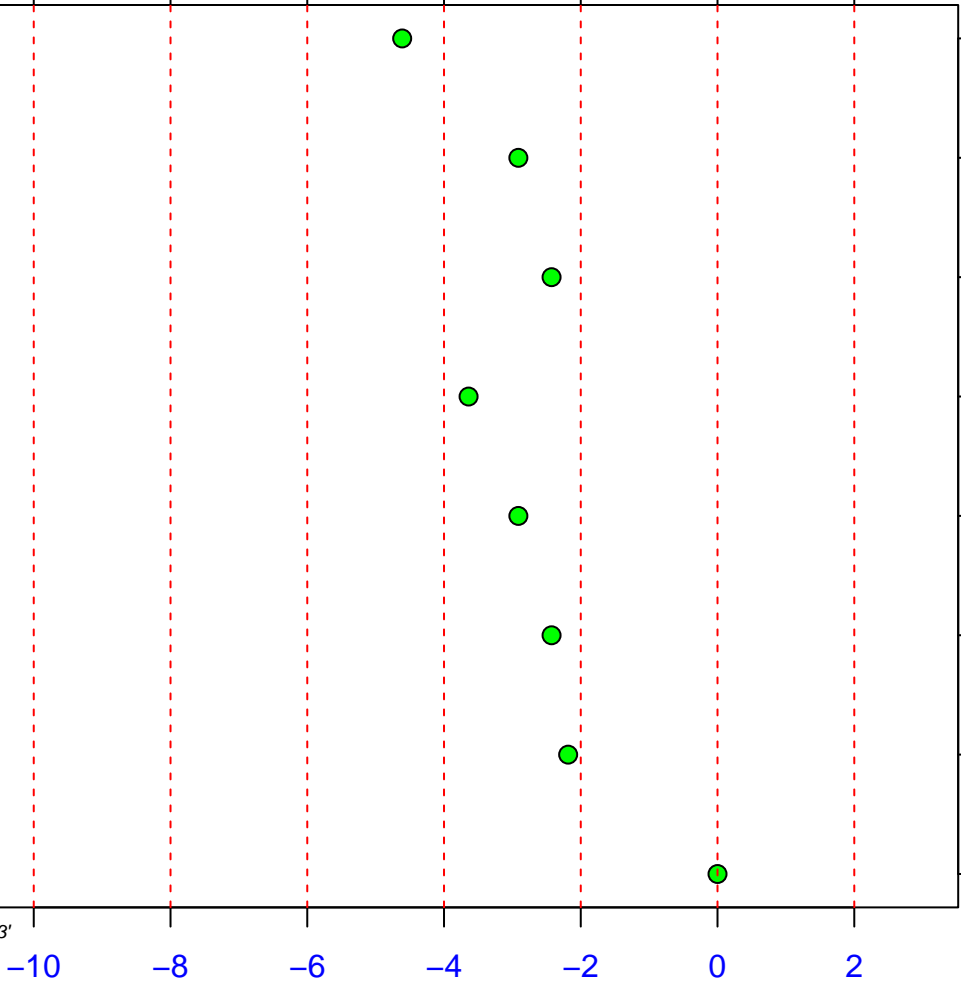

%diff 100\*(GBBS-TG43)/TG43

GBBS(solid model applicator, body, balloon & rectal contrast, packing contrast)

# Patient\_08 D2cc rectum

'phantom least similar to TG43'

D(Y, N, B, B)

D(Y, N, B, N)

D(Y, N, B, M)

D(N, N, N, N)

D(Y, N, N, N)

D(Y, N, M, M)

D(Y, M, X, X)

D(N, M, X, X)

'phantom most similar to TG43'

-10 -8 -6 -4 -2 0 2

%diff 100\*(GBBS-TG43)/TG43

GBBS(solid model applicator, body, balloon & rectal contrast, packing contrast)

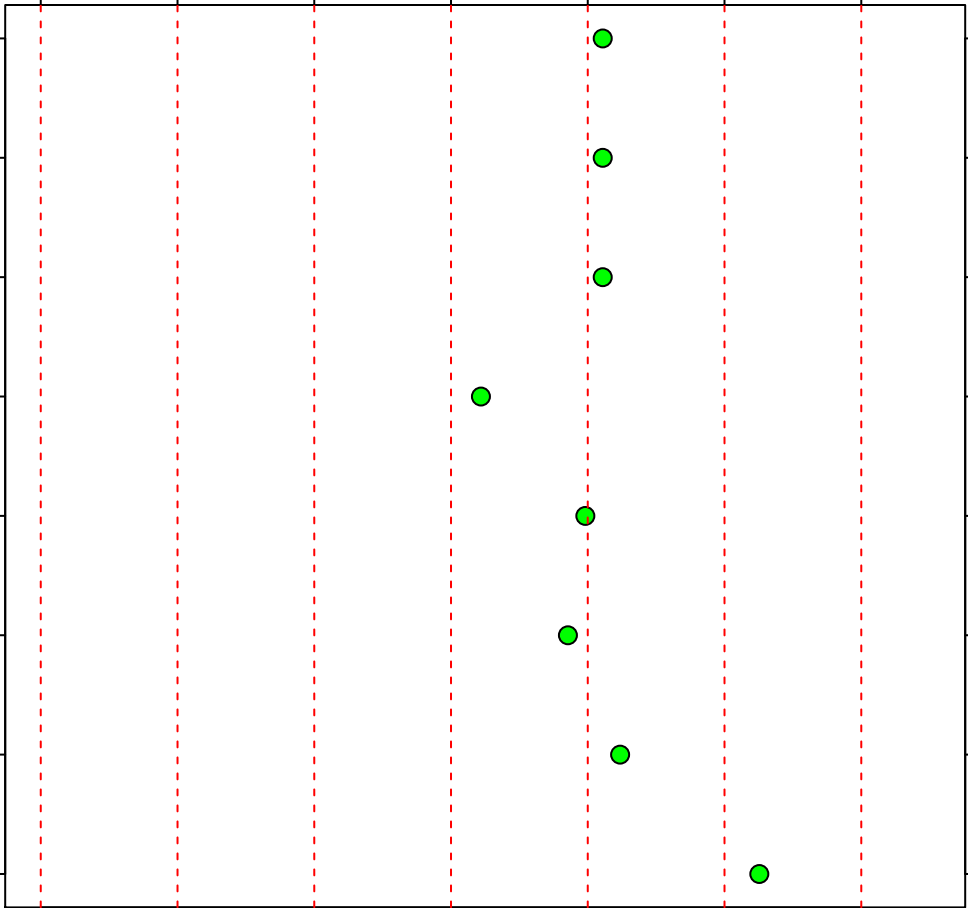

# Patient\_09 D2cc rectum

'phantom least similar to TG43'

GBBS(solid model applicator, body, balloon & rectal contrast, packing contrast)

- D(Y, N, B, B)
- D(Y, N, B, N)
- D(Y, N, B, M)
- D(N, N, N, N)
- D(Y, N, N, N)
- D(Y, N, M, M)
- D(Y, M, X, X)
- D(N, M, X, X)

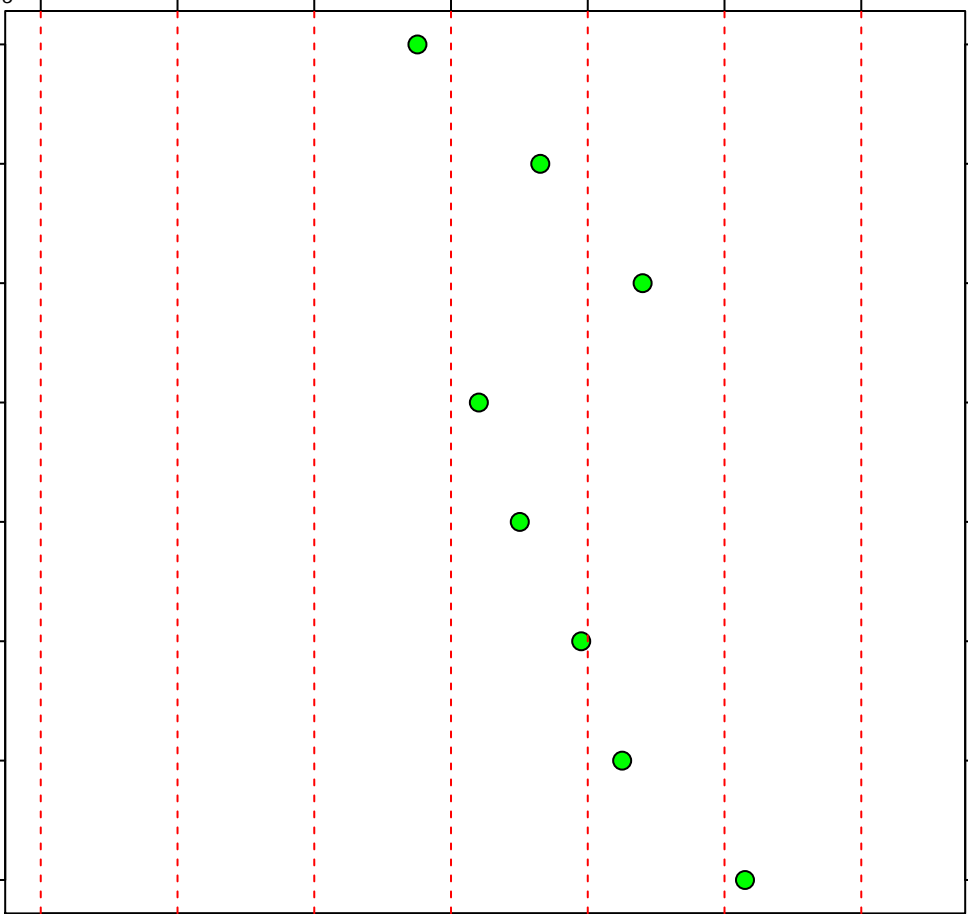

'phantom most similar to TG43'

-10 -8 -6 -4 -2 0 2

%diff 100\*(GBBS-TG43)/TG43



# Patient\_10 D2cc rectum

'phantom least similar to TG43'

- D(Y, N, B, B)
- D(Y, N, B, N)
- D(Y, N, B, M)
- D(N, N, N, N)
- D(Y, N, N, N)
- D(Y, N, M, M)
- D(Y, M, X, X)
- D(N, M, X, X)

'phantom most similar to TG43'

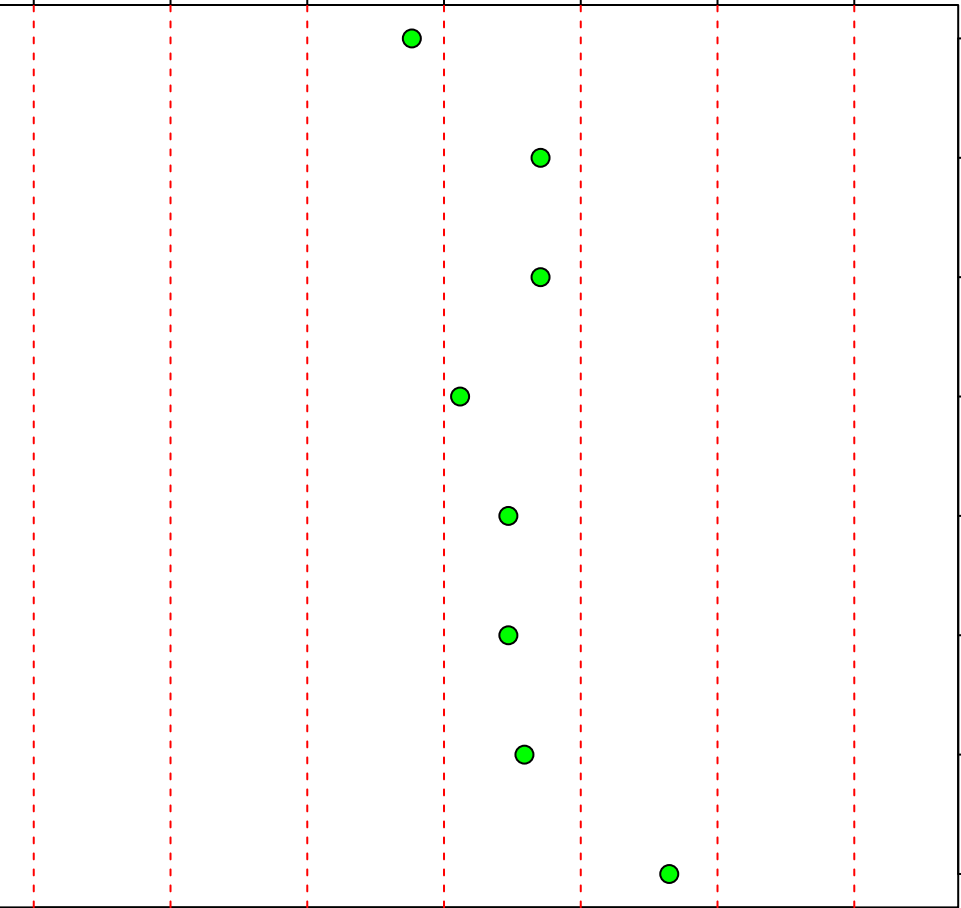

%diff 100\*(GBBS-TG43)/TG43

GBBS(solid model applicator, body, balloon & rectal contrast, packing contrast)

# Patient\_11 D2cc rectum

'phantom least similar to TG43'

D(Y, N, B, B)

D(Y, N, B, N)

D(Y, N, B, M)

D(N, N, N, N)

D(Y, N, N, N)

D(Y, N, M, M)

D(Y, M, X, X)

D(N, M, X, X)

'phantom most similar to TG43'

-10

-8

-6

-4

-2

0

2

%diff 100\*(GBBS-TG43)/TG43

GBBS(solid model applicator, body, balloon & rectal contrast, packing contrast)

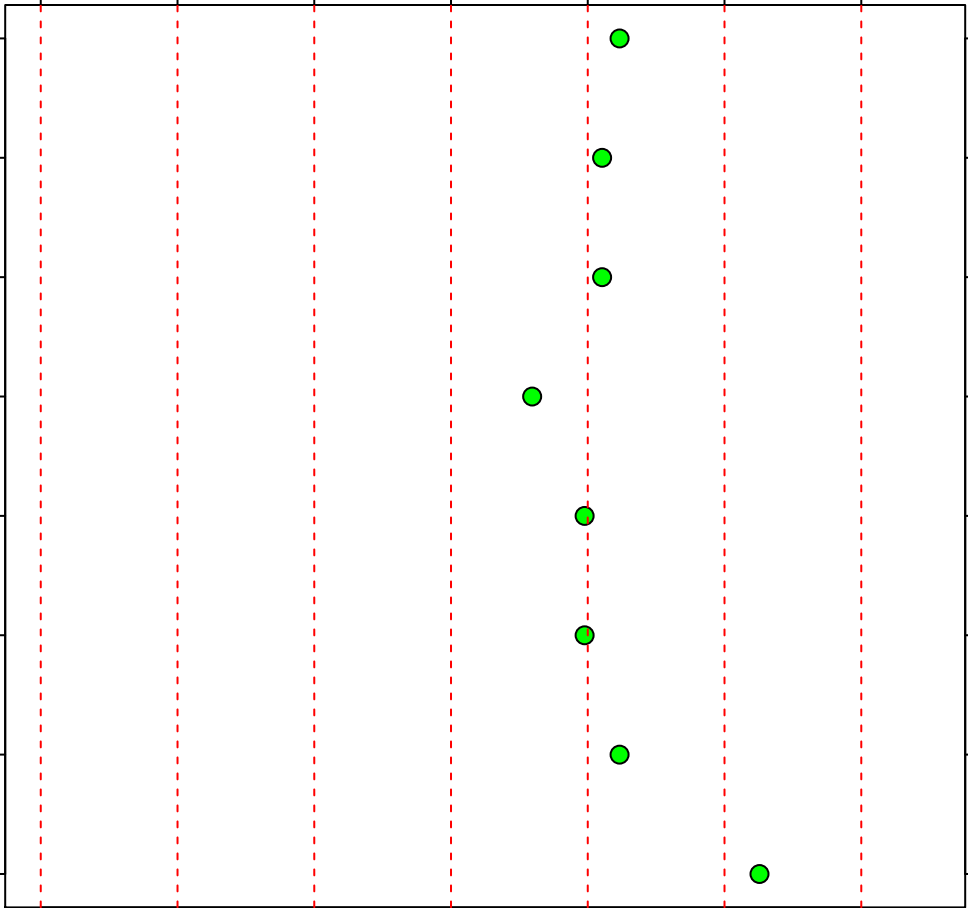

# Patient\_12 D2cc rectum

'phantom least similar to TG43'

- D(Y, N, B, B)
- D(Y, N, B, N)
- D(Y, N, B, M)
- D(N, N, N, N)
- D(Y, N, N, N)
- D(Y, N, M, M)
- D(Y, M, X, X)
- D(N, M, X, X)

'phantom most similar to TG43'

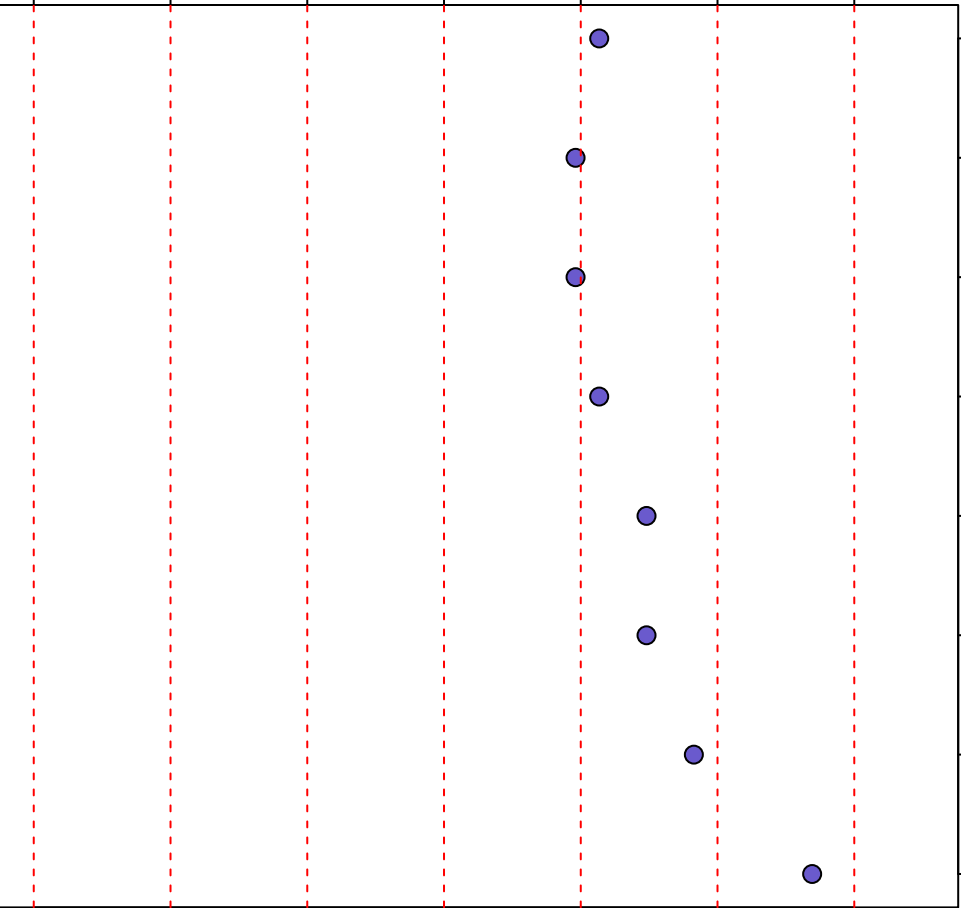

%diff 100\*(GBBS-TG43)/TG43

GBBS(solid model applicator, body, balloon & rectal contrast, packing contrast)

# Patient\_13 D2cc rectum

'phantom least similar to TG43'

- D(Y, N, B, B)
- D(Y, N, B, N)
- D(Y, N, B, M)
- D(N, N, N, N)
- D(Y, N, N, N)
- D(Y, N, M, M)
- D(Y, M, X, X)
- D(N, M, X, X)

'phantom most similar to TG43'

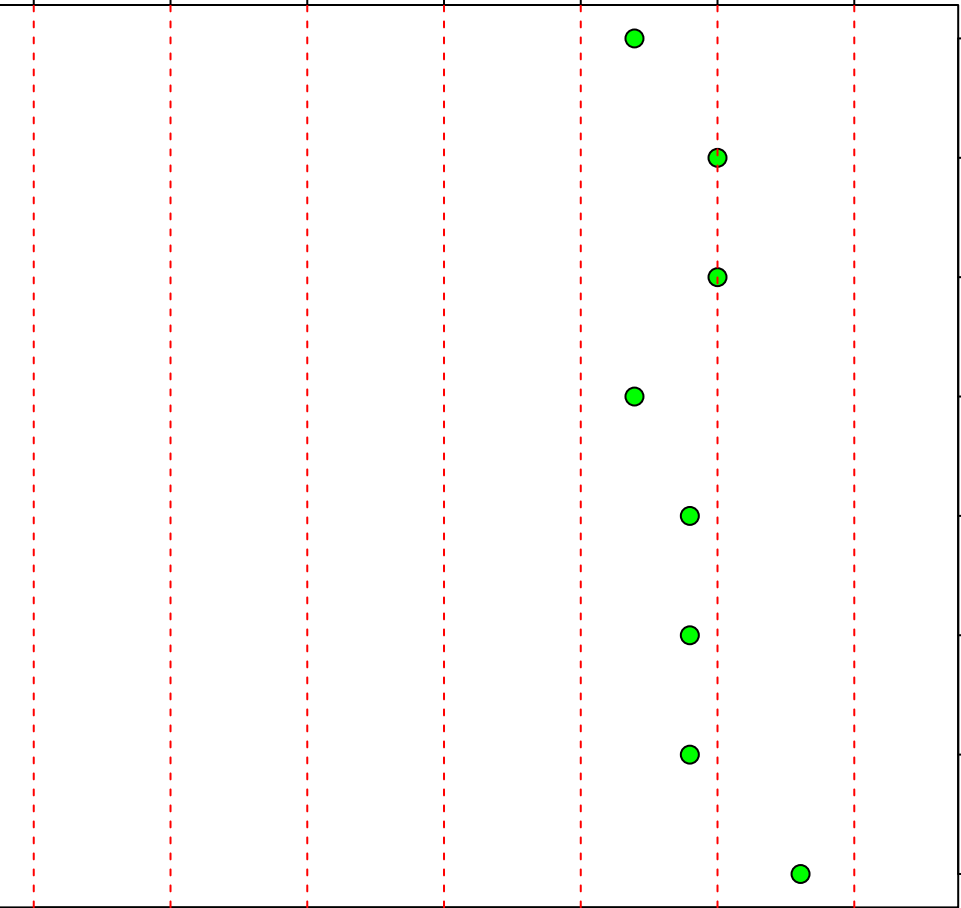

%diff 100\*(GBBS-TG43)/TG43

GBBS(solid model applicator, body, balloon & rectal contrast, packing contrast)

# Patient\_14 D2cc rectum

'phantom least similar to TG43'

- D(Y, N, B, B)
- D(Y, N, B, N)
- D(Y, N, B, M)
- D(N, N, N, N)
- D(Y, N, N, N)
- D(Y, N, M, M)
- D(Y, M, X, X)
- D(N, M, X, X)

'phantom most similar to TG43'

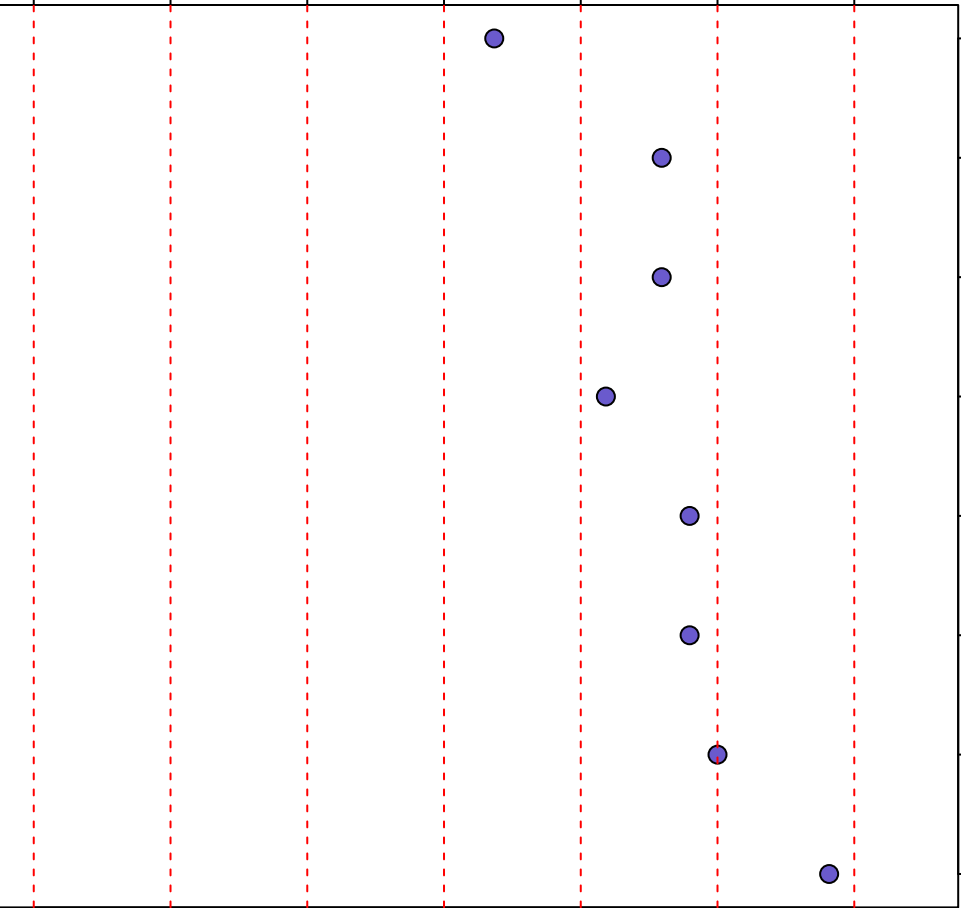

%diff 100\*(GBBS-TG43)/TG43

GBBS(solid model applicator, body, balloon & rectal contrast, packing contrast)

# Patient\_15 D2cc rectum

'phantom least similar to TG43'

D(Y, N, B, B)

D(Y, N, B, N)

D(Y, N, B, M)

D(N, N, N, N)

D(Y, N, N, N)

D(Y, N, M, M)

D(Y, M, X, X)

D(N, M, X, X)

'phantom most similar to TG43'

-10 -8 -6 -4 -2 0 2

%diff 100\*(GBBS-TG43)/TG43

GBBS(solid model applicator, body, balloon & rectal contrast, packing contrast)

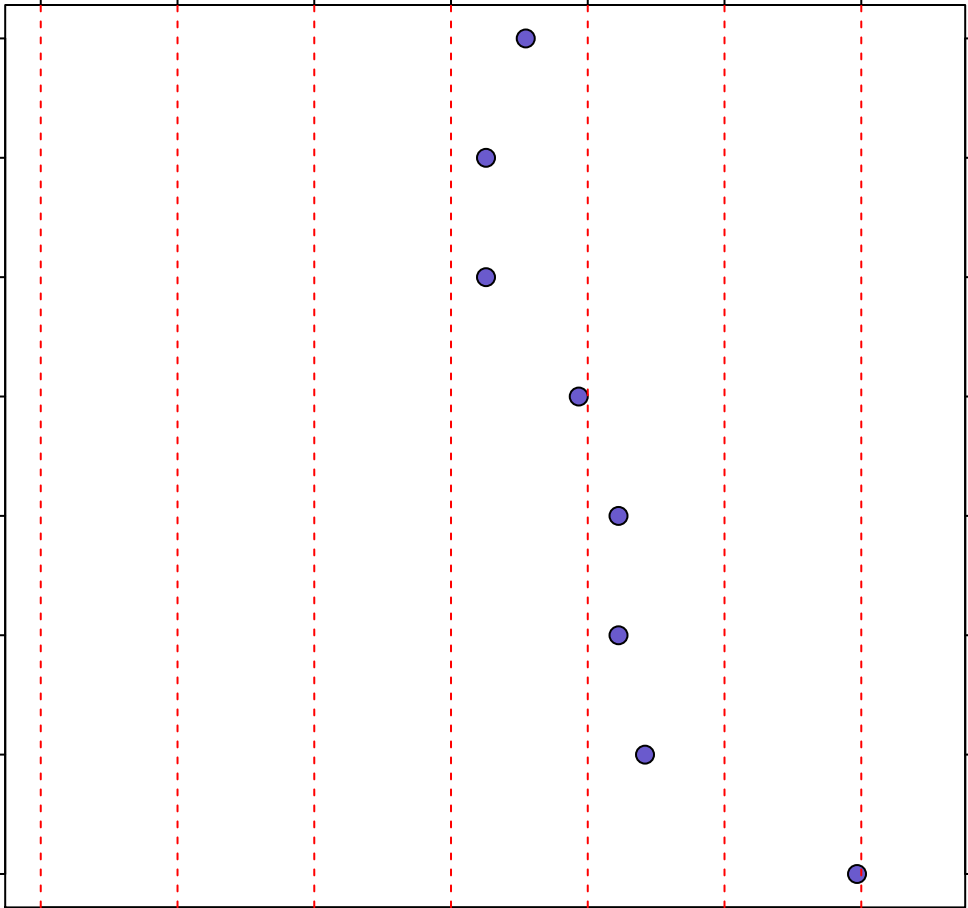

# Patient\_16 D2cc rectum

'phantom least similar to TG43'

D(Y, N, B, B)

D(Y, N, B, N)

D(Y, N, B, M)

D(N, N, N, N)

D(Y, N, N, N)

D(Y, N, M, M)

D(Y, M, X, X)

D(N, M, X, X)

'phantom most similar to TG43'

-10 -8 -6 -4 -2 0 2

%diff 100\*(GBBS-TG43)/TG43

GBBS(solid model applicator, body, balloon & rectal contrast, packing contrast)

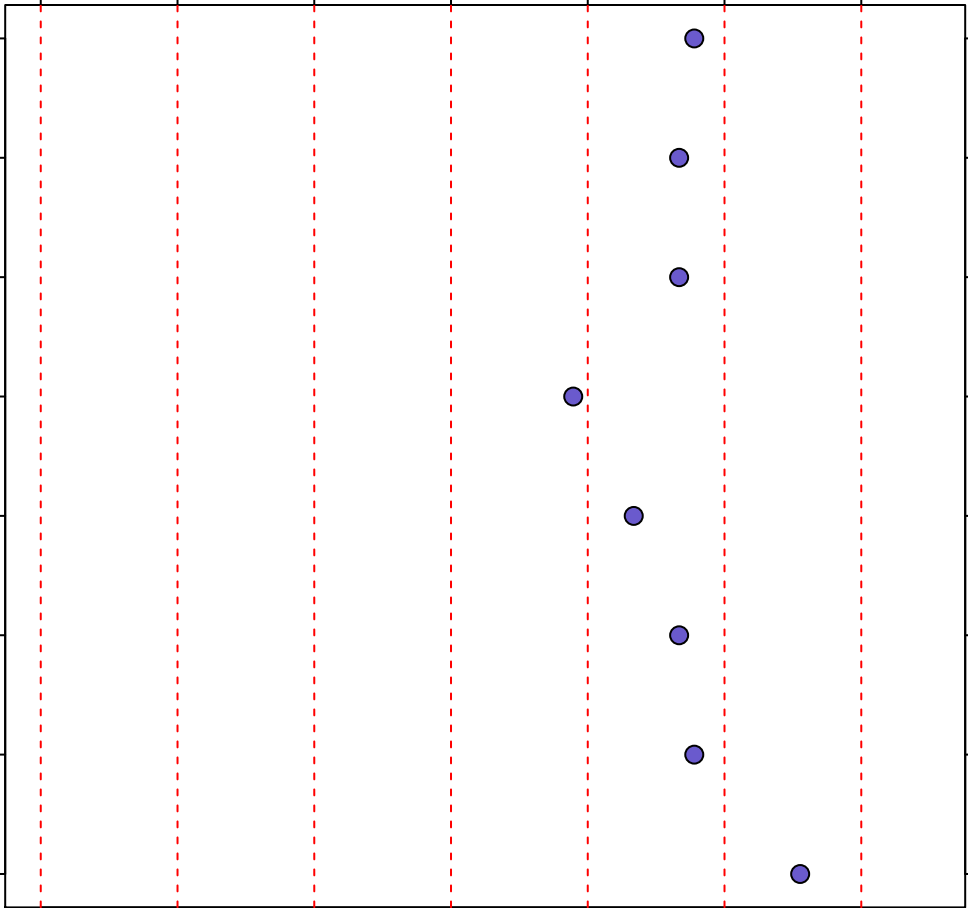

# Patient\_17 D2cc rectum

'phantom least similar to TG43'

D(Y, N, B, B)

D(Y, N, B, N)

D(Y, N, B, M)

D(N, N, N, N)

D(Y, N, N, N)

D(Y, N, M, M)

D(Y, M, X, X)

D(N, M, X, X)

'phantom most similar to TG43'

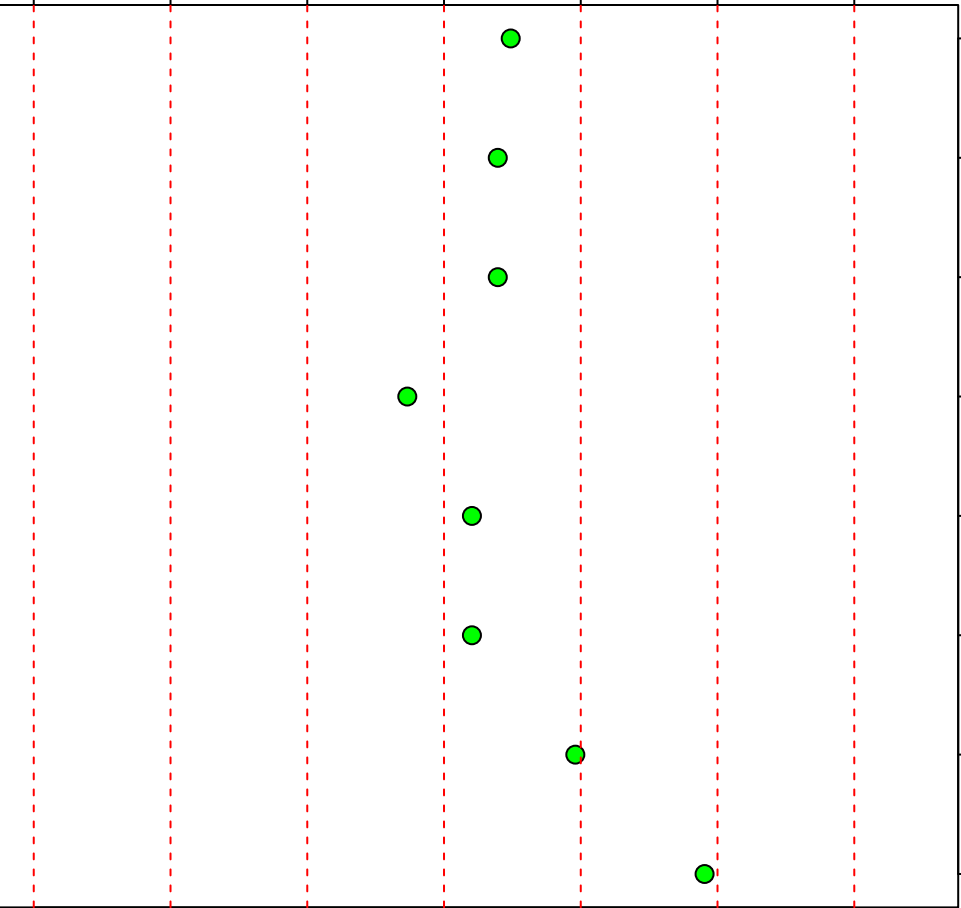

%diff 100\*(GBBS-TG43)/TG43

GBBS(solid model applicator, body, balloon & rectal contrast, packing contrast)



# Patient\_18 D2cc rectum

'phantom least similar to TG43'

D(Y, N, B, B)

D(Y, N, B, N)

D(Y, N, B, M)

D(N, N, N, N)

D(Y, N, N, N)

D(Y, N, M, M)

D(Y, M, X, X)

D(N, M, X, X)

'phantom most similar to TG43'

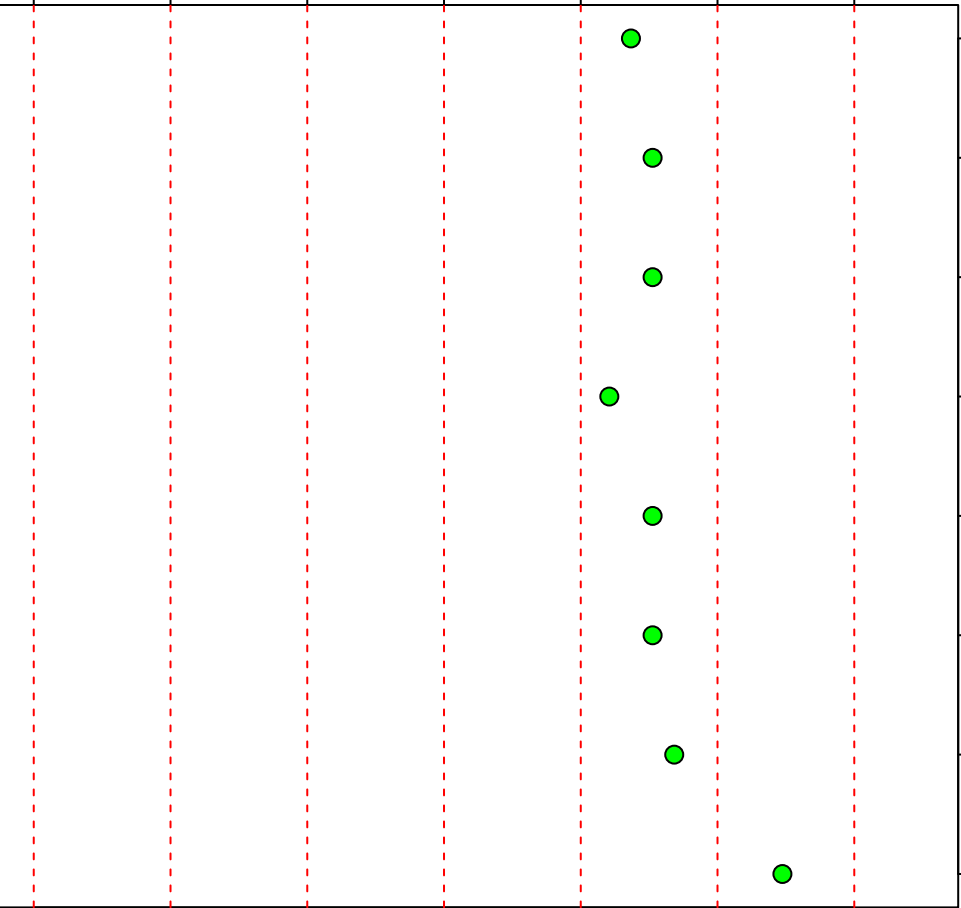

%diff 100\*(GBBS-TG43)/TG43

GBBS(solid model applicator, body, balloon & rectal contrast, packing contrast)

# Patient\_19 D2cc rectum

'phantom least similar to TG43'

D(Y, N, B, B)

D(Y, N, B, N)

D(Y, N, B, M)

D(N, N, N, N)

D(Y, N, N, N)

D(Y, N, M, M)

D(Y, M, X, X)

D(N, M, X, X)

'phantom most similar to TG43'

-10 -8 -6 -4 -2 0 2

%diff 100\*(GBBS-TG43)/TG43

GBBS(solid model applicator, body, balloon & rectal contrast, packing contrast)

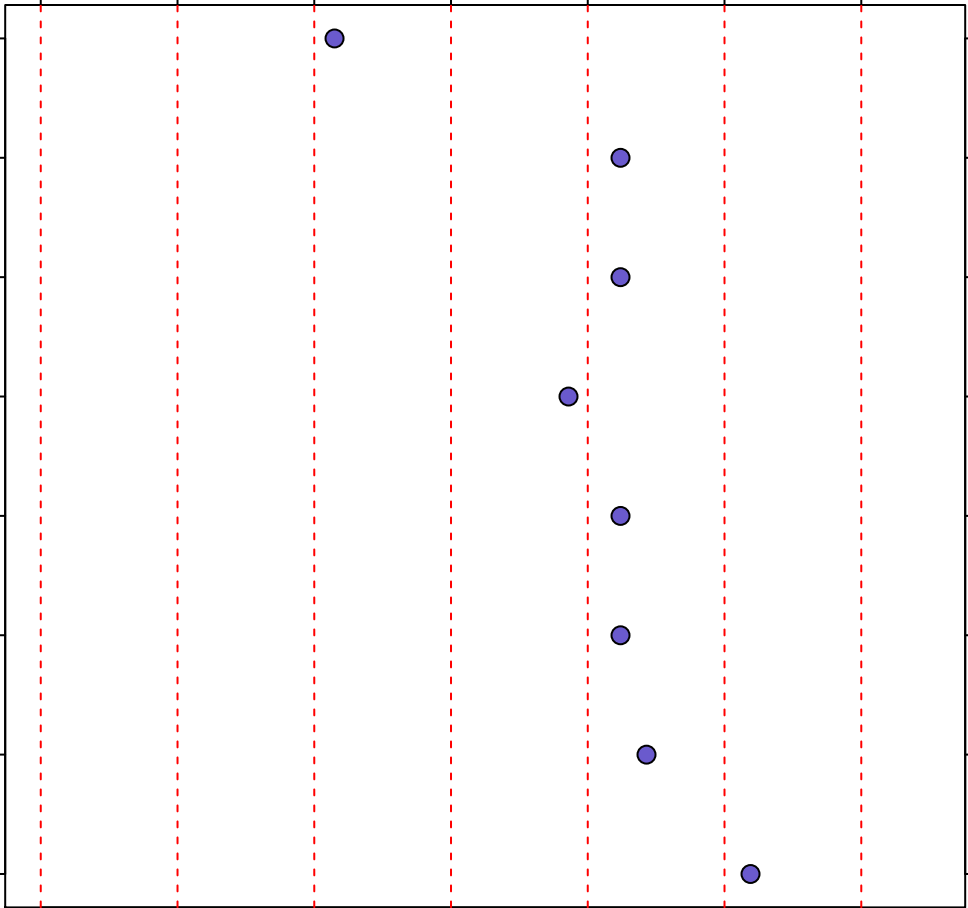

# Patient\_20 D2cc rectum

'phantom least similar to TG43'

- D(Y, N, B, B)
- D(Y, N, B, N)
- D(Y, N, B, M)
- D(N, N, N, N)
- D(Y, N, N, N)
- D(Y, N, M, M)
- D(Y, M, X, X)
- D(N, M, X, X)

'phantom most similar to TG43'

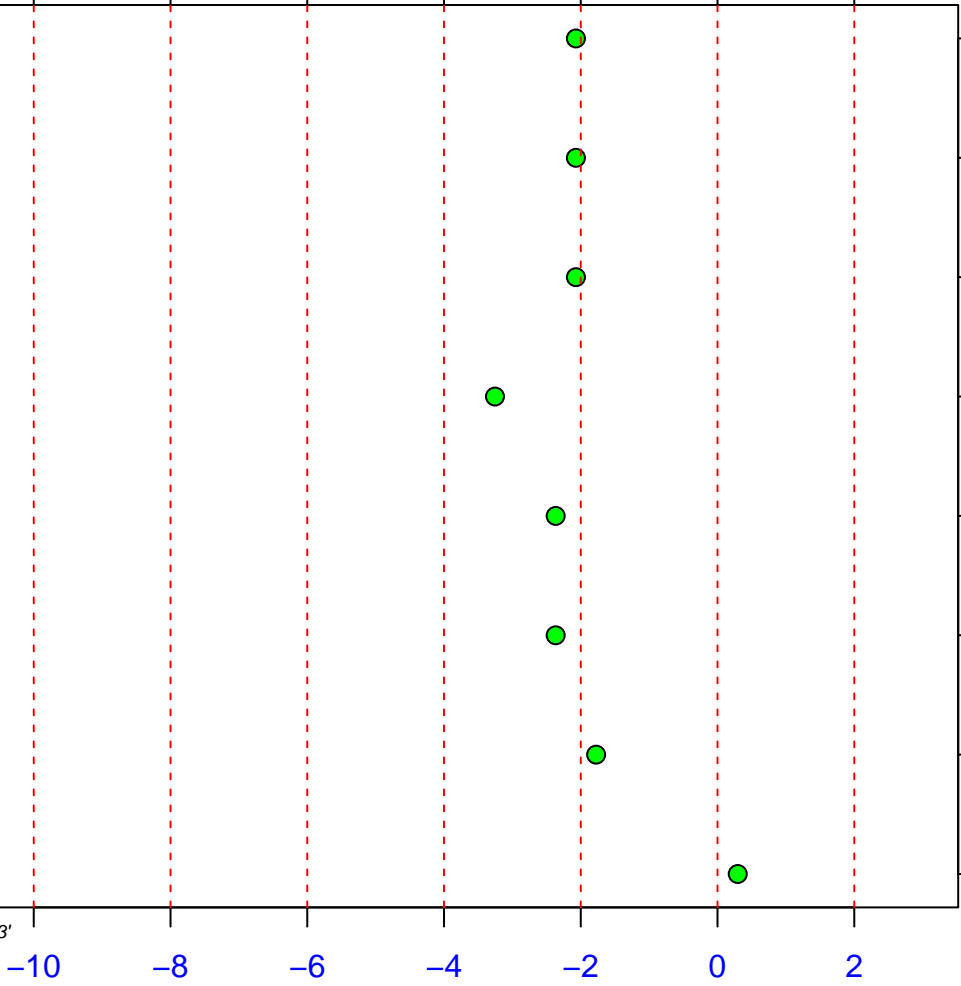

%diff 100\*(GBBS-TG43)/TG43

GBBS(solid model applicator, body, balloon & rectal contrast, packing contrast)

# Patient\_21 D2cc rectum

'phantom least similar to TG43'

D(Y, N, B, B)

D(Y, N, B, N)

D(Y, N, B, M)

D(N, N, N, N)

D(Y, N, N, N)

D(Y, N, M, M)

D(Y, M, X, X)

D(N, M, X, X)

'phantom most similar to TG43'

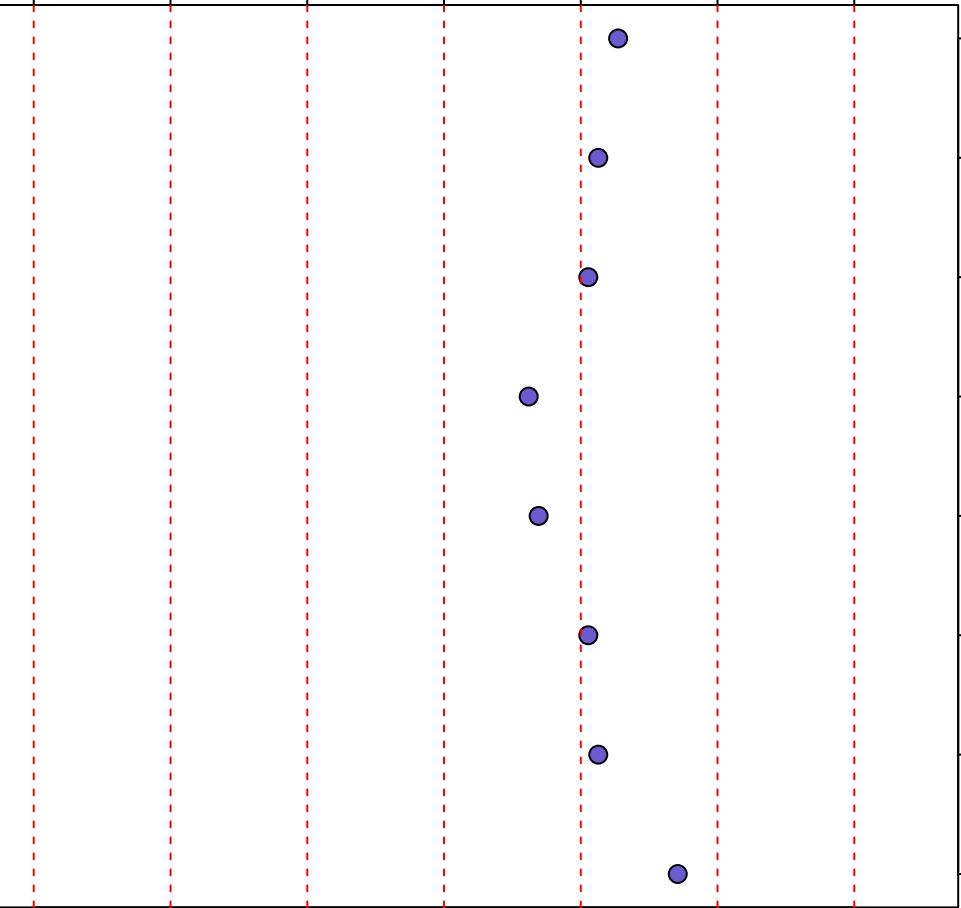

-10 -8 -6 -4 -2 0 2

%diff 100\*(GBBS-TG43)/TG43

GBBS(solid model applicator, body, balloon & rectal contrast, packing contrast)

# Patient\_22 D2cc rectum

'phantom least similar to TG43'

D(Y, N, B, B)

D(Y, N, B, N)

D(Y, N, B, M)

D(N, N, N, N)

D(Y, N, N, N)

D(Y, N, M, M)

D(Y, M, X, X)

D(N, M, X, X)

'phantom most similar to TG43'

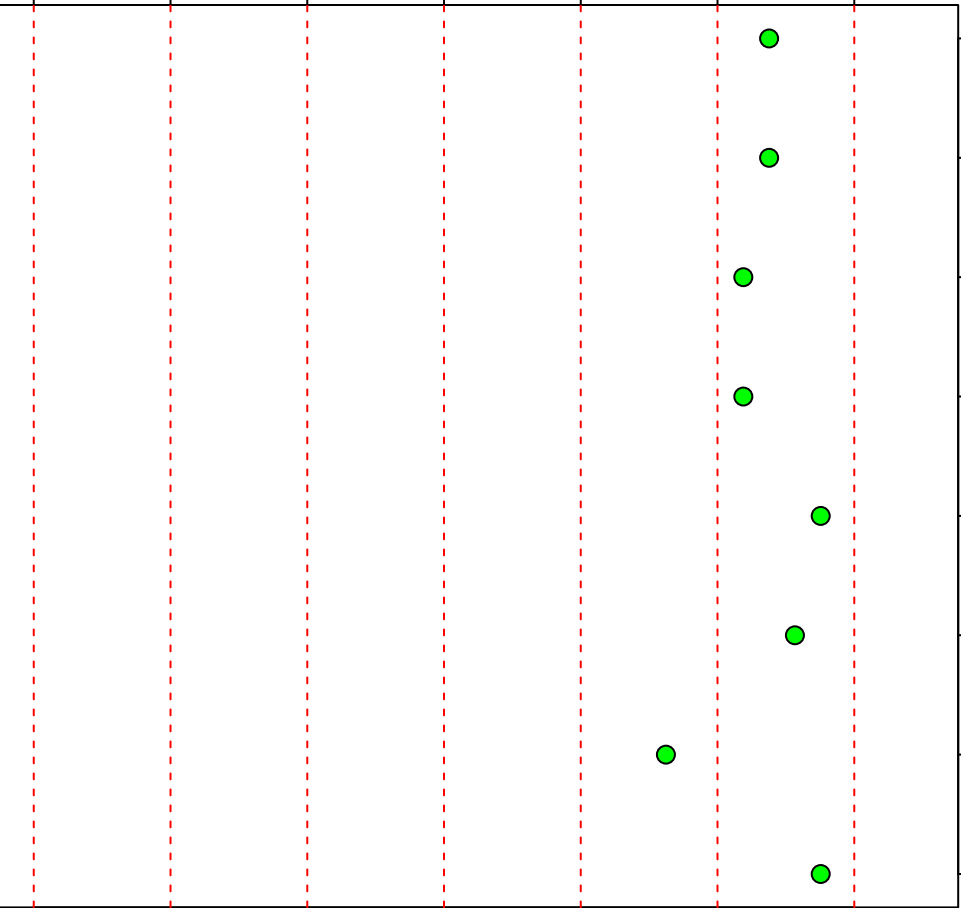

-10

-8

-6

-4

-2

0

2

%diff 100\*(GBBS-TG43)/TG43

GBBS(solid model applicator, body, balloon & rectal contrast, packing contrast)

# Patient\_23 D2cc rectum

'phantom least similar to TG43'

- D(Y, N, B, B)
- D(Y, N, B, N)
- D(Y, N, B, M)
- D(N, N, N, N)
- D(Y, N, N, N)
- D(Y, N, M, M)
- D(Y, M, X, X)
- D(N, M, X, X)

'phantom most similar to TG43'

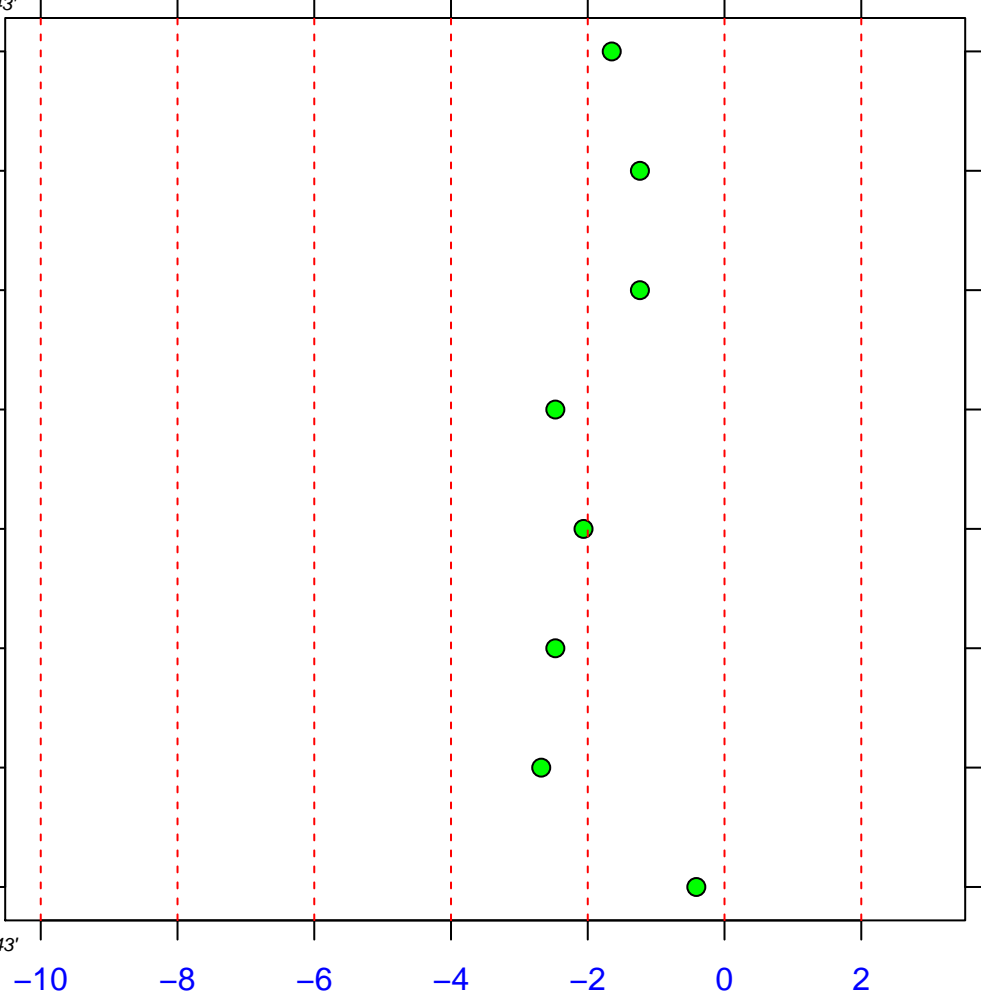

%diff 100\*(GBBS-TG43)/TG43

GBBS(solid model applicator, body, balloon & rectal contrast, packing contrast)

# Patient\_24 D2cc rectum

'phantom least similar to TG43'

D(Y, N, B, B)

D(Y, N, B, N)

D(Y, N, B, M)

D(N, N, N, N)

D(Y, N, N, N)

D(Y, N, M, M)

D(Y, M, X, X)

D(N, M, X, X)

'phantom most similar to TG43'

-10

-8

-6

-4

-2

0

2

%diff 100\*(GBBS-TG43)/TG43

GBBS(solid model applicator, body, balloon & rectal contrast, packing contrast)

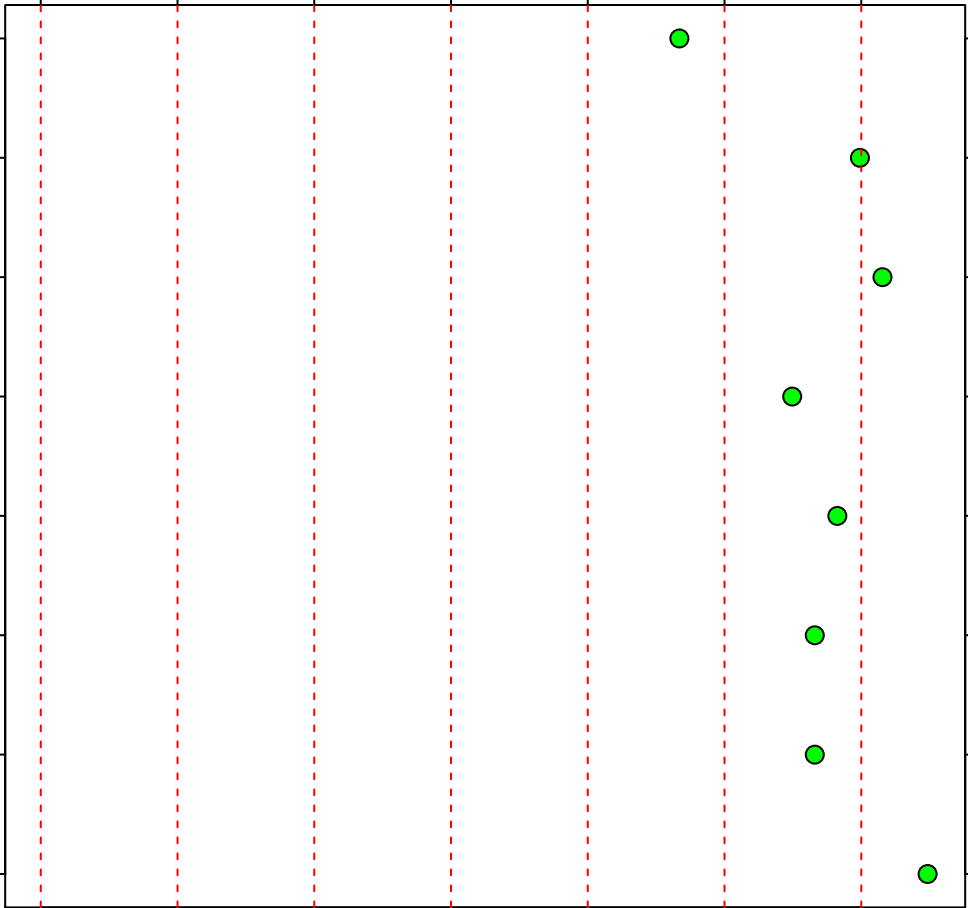

# Patient\_25 D2cc rectum

'phantom least similar to TG43'

D(Y, N, B, B)

D(Y, N, B, N)

D(Y, N, B, M)

D(N, N, N, N)

D(Y, N, N, N)

D(Y, N, M, M)

D(Y, M, X, X)

D(N, M, X, X)

'phantom most similar to TG43'

-10 -8 -6 -4 -2 0 2

%diff 100\*(GBBS-TG43)/TG43

GBBS(solid model applicator, body, balloon & rectal contrast, packing contrast)

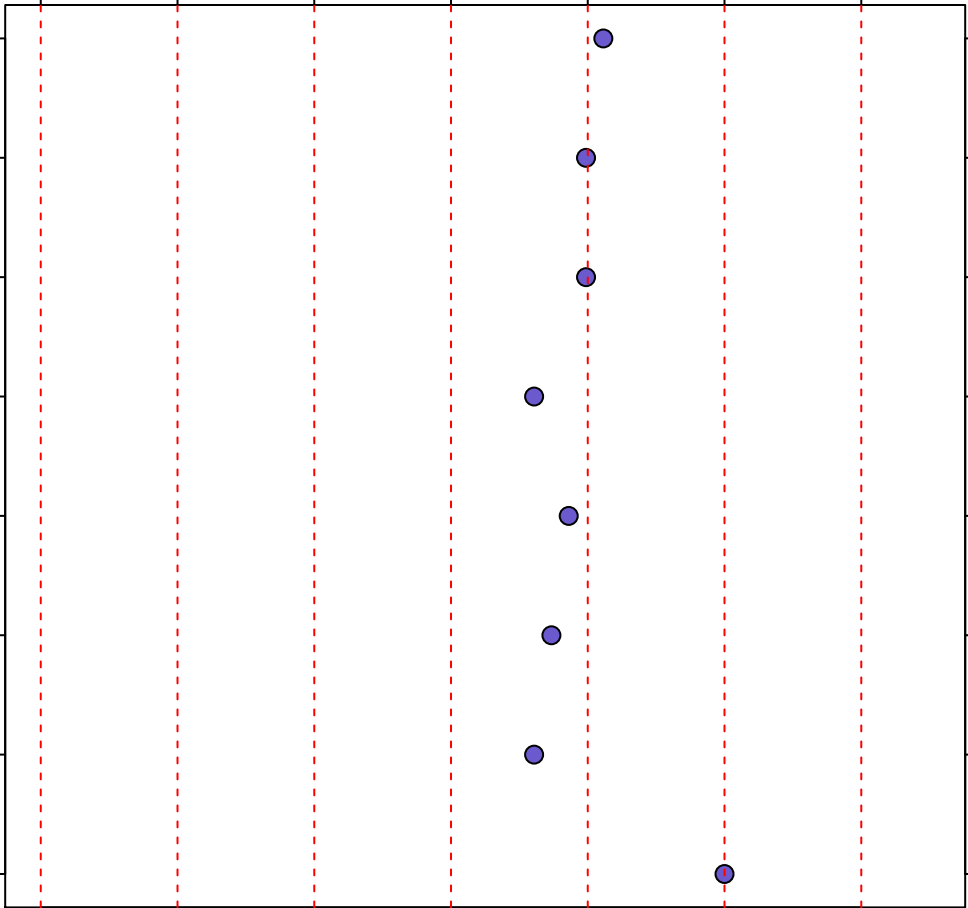



# Patient\_26 D2cc rectum

'phantom least similar to TG43'

D(Y, N, B, B)

D(Y, N, B, N)

D(Y, N, B, M)

D(N, N, N, N)

D(Y, N, N, N)

D(Y, N, M, M)

D(Y, M, X, X)

D(N, M, X, X)

'phantom most similar to TG43'

-10 -8 -6 -4 -2 0 2

%diff 100\*(GBBS-TG43)/TG43

GBBS(solid model applicator, body, balloon & rectal contrast, packing contrast)

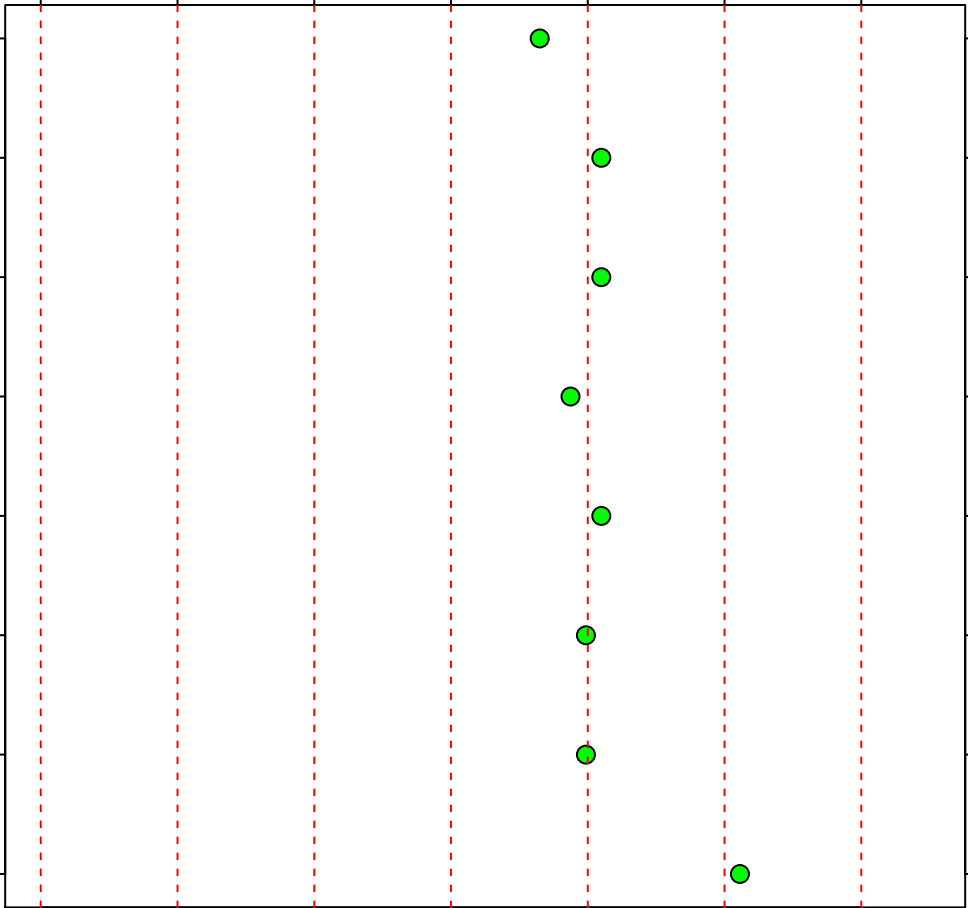

# Patient\_01 D2cc sigmoid

'phantom least similar to TG43'

D(Y, N, B, B)

D(Y, N, B, N)

D(Y, N, B, M)

D(N, N, N, N)

D(Y, N, N, N)

D(Y, N, M, M)

D(Y, M, X, X)

D(N, M, X, X)

'phantom most similar to TG43'

-10

-8

-6

-4

-2

0

2

%diff 100\*(GBBS-TG43)/TG43

GBBS(solid model applicator, body, balloon & rectal contrast, packing contrast)

# Patient\_02 D2cc sigmoid

'phantom least similar to TG43'

D(Y, N, B, B)

D(Y, N, B, N)

D(Y, N, B, M)

D(N, N, N, N)

D(Y, N, N, N)

D(Y, N, M, M)

D(Y, M, X, X)

D(N, M, X, X)

'phantom most similar to TG43'

-10

-8

-6

-4

-2

0

2

%diff 100\*(GBBS-TG43)/TG43

GBBS(solid model applicator, body, balloon & rectal contrast, packing contrast)

# Patient\_03 D2cc sigmoid

'phantom least similar to TG43'

D(Y, N, B, B)

D(Y, N, B, N)

D(Y, N, B, M)

D(N, N, N, N)

D(Y, N, N, N)

D(Y, N, M, M)

D(Y, M, X, X)

D(N, M, X, X)

'phantom most similar to TG43'

-10

-8

-6

-4

-2

0

2

%diff 100\*(GBBS-TG43)/TG43

GBBS(solid model applicator, body, balloon & rectal contrast, packing contrast)

# Patient\_04 D2cc sigmoid

'phantom least similar to TG43'

- D(Y, N, B, B)
- D(Y, N, B, N)
- D(Y, N, B, M)
- D(N, N, N, N)
- D(Y, N, N, N)
- D(Y, N, M, M)
- D(Y, M, X, X)
- D(N, M, X, X)

'phantom most similar to TG43'

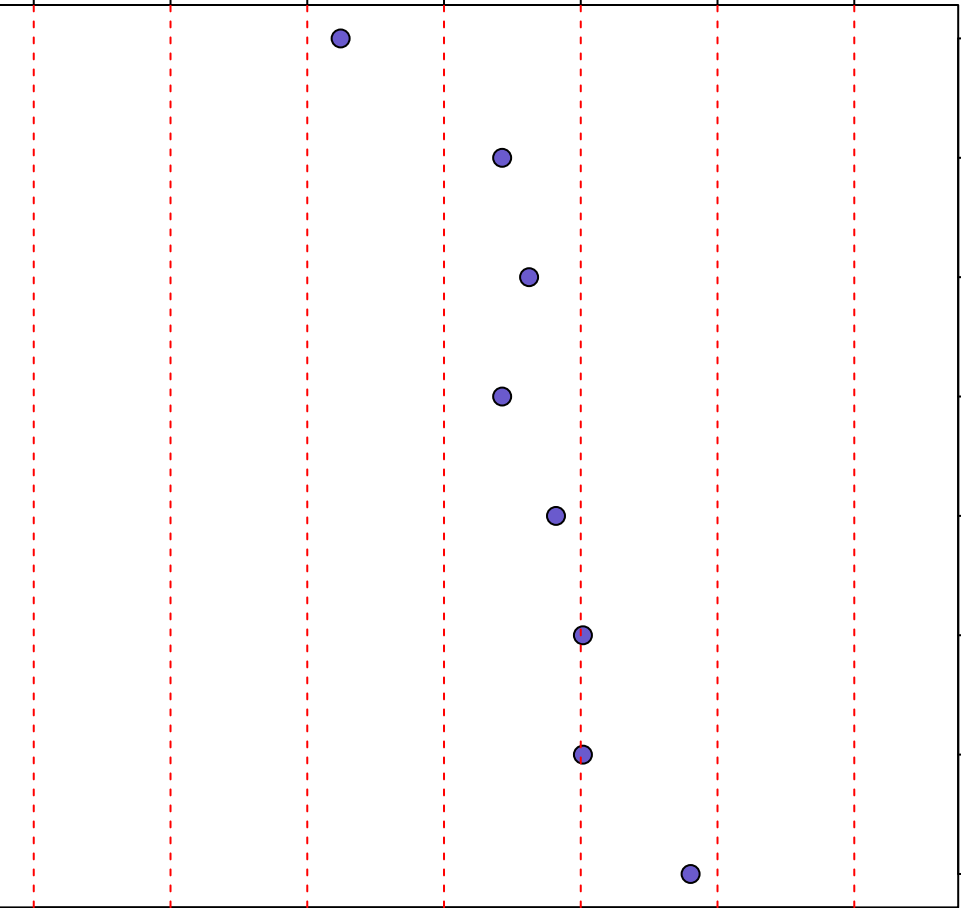

%diff 100\*(GBBS-TG43)/TG43

GBBS(solid model applicator, body, balloon & rectal contrast, packing contrast)

# Patient\_05 D2cc sigmoid

'phantom least similar to TG43'

D(Y, N, B, B)

D(Y, N, B, N)

D(Y, N, B, M)

D(N, N, N, N)

D(Y, N, N, N)

D(Y, N, M, M)

D(Y, M, X, X)

D(N, M, X, X)

'phantom most similar to TG43'

-10

-8

-6

-4

-2

0

2

%diff 100\*(GBBS-TG43)/TG43

GBBS(solid model applicator, body, balloon & rectal contrast, packing contrast)

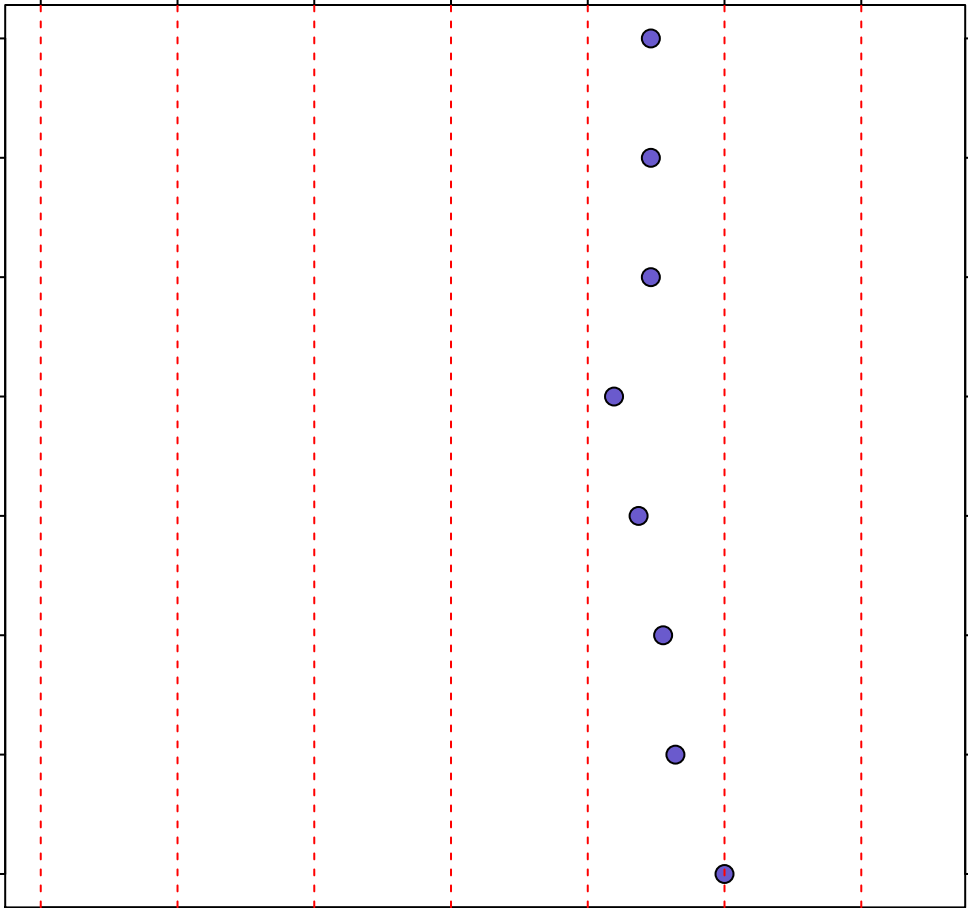

# Patient\_06 D2cc sigmoid

'phantom least similar to TG43'

- D(Y, N, B, B)
- D(Y, N, B, N)
- D(Y, N, B, M)
- D(N, N, N, N)
- D(Y, N, N, N)
- D(Y, N, M, M)
- D(Y, M, X, X)
- D(N, M, X, X)

'phantom most similar to TG43'

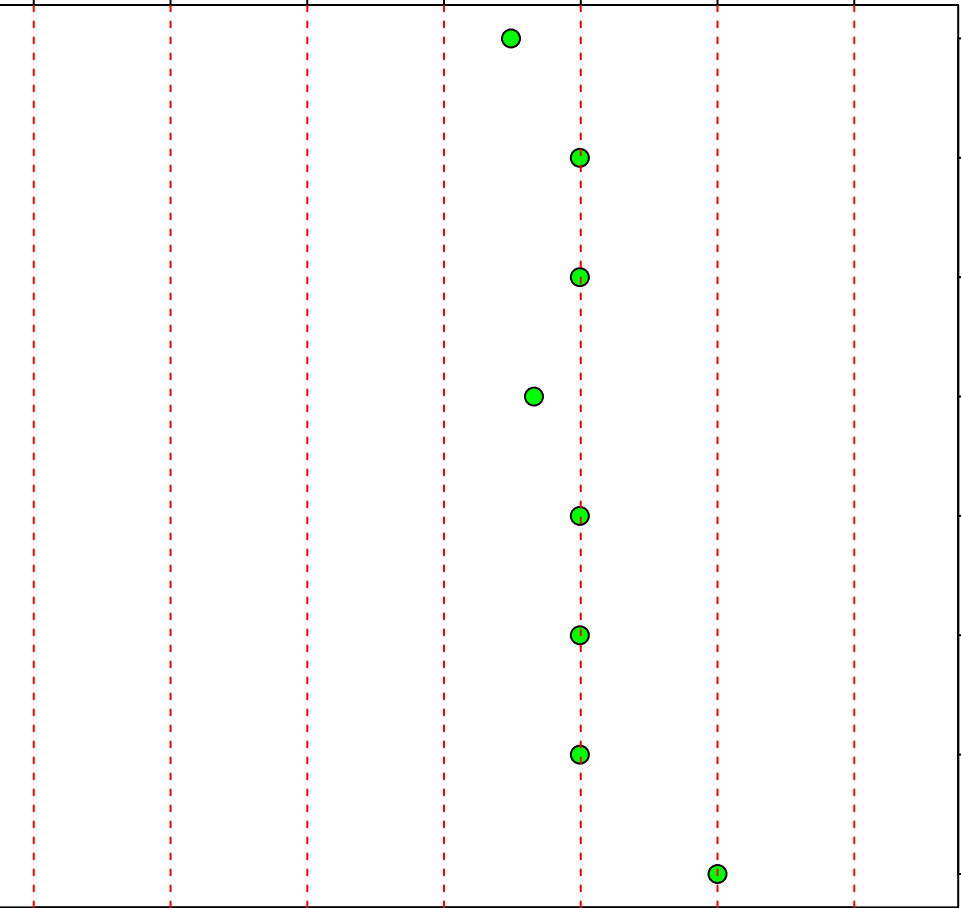

%diff 100\*(GBBS-TG43)/TG43

GBBS(solid model applicator, body, balloon & rectal contrast, packing contrast)

# Patient\_07 D2cc sigmoid

'phantom least similar to TG43'

- D(Y, N, B, B)
- D(Y, N, B, N)
- D(Y, N, B, M)
- D(N, N, N, N)
- D(Y, N, N, N)
- D(Y, N, M, M)
- D(Y, M, X, X)
- D(N, M, X, X)

'phantom most similar to TG43'

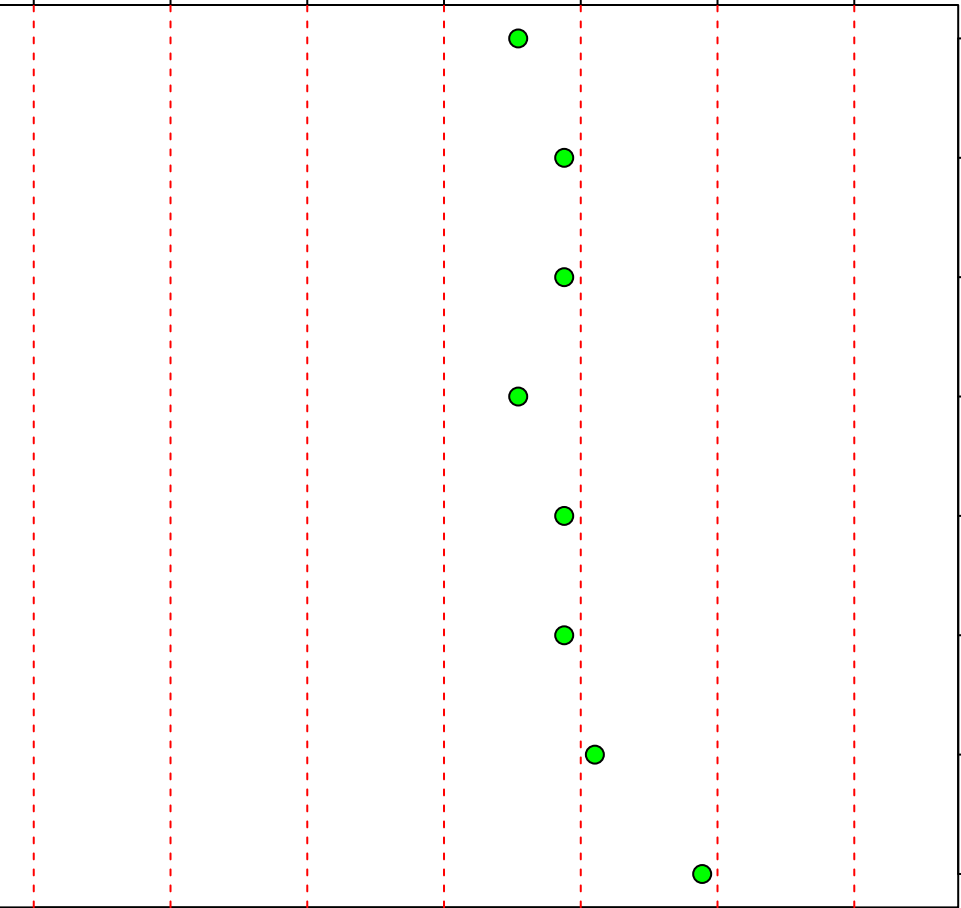

%diff 100\*(GBBS-TG43)/TG43

GBBS(solid model applicator, body, balloon & rectal contrast, packing contrast)



# Patient\_08 D2cc sigmoid

'phantom least similar to TG43'

D(Y, N, B, B)

D(Y, N, B, N)

D(Y, N, B, M)

D(N, N, N, N)

D(Y, N, N, N)

D(Y, N, M, M)

D(Y, M, X, X)

D(N, M, X, X)

'phantom most similar to TG43'

-10

-8

-6

-4

-2

0

2

%diff 100\*(GBBS-TG43)/TG43

GBBS(solid model applicator, body, balloon & rectal contrast, packing contrast)

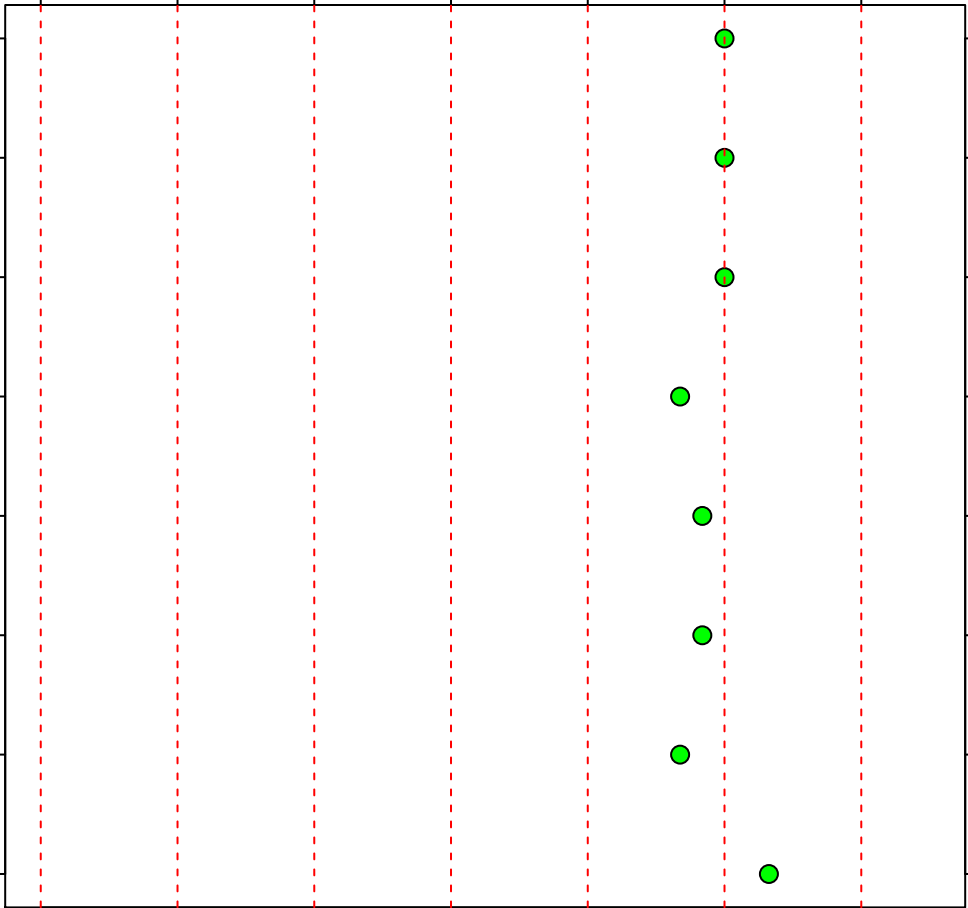

# Patient\_09 D2cc sigmoid

'phantom least similar to TG43'

D(Y, N, B, B)

D(Y, N, B, N)

D(Y, N, B, M)

D(N, N, N, N)

D(Y, N, N, N)

D(Y, N, M, M)

D(Y, M, X, X)

D(N, M, X, X)

'phantom most similar to TG43'



%diff 100\*(GBBS-TG43)/TG43

GBBS(solid model applicator, body, balloon & rectal contrast, packing contrast)

# Patient\_10 D2cc sigmoid

'phantom least similar to TG43'

- D(Y, N, B, B)
- D(Y, N, B, N)
- D(Y, N, B, M)
- D(N, N, N, N)
- D(Y, N, N, N)
- D(Y, N, M, M)
- D(Y, M, X, X)
- D(N, M, X, X)

'phantom most similar to TG43'

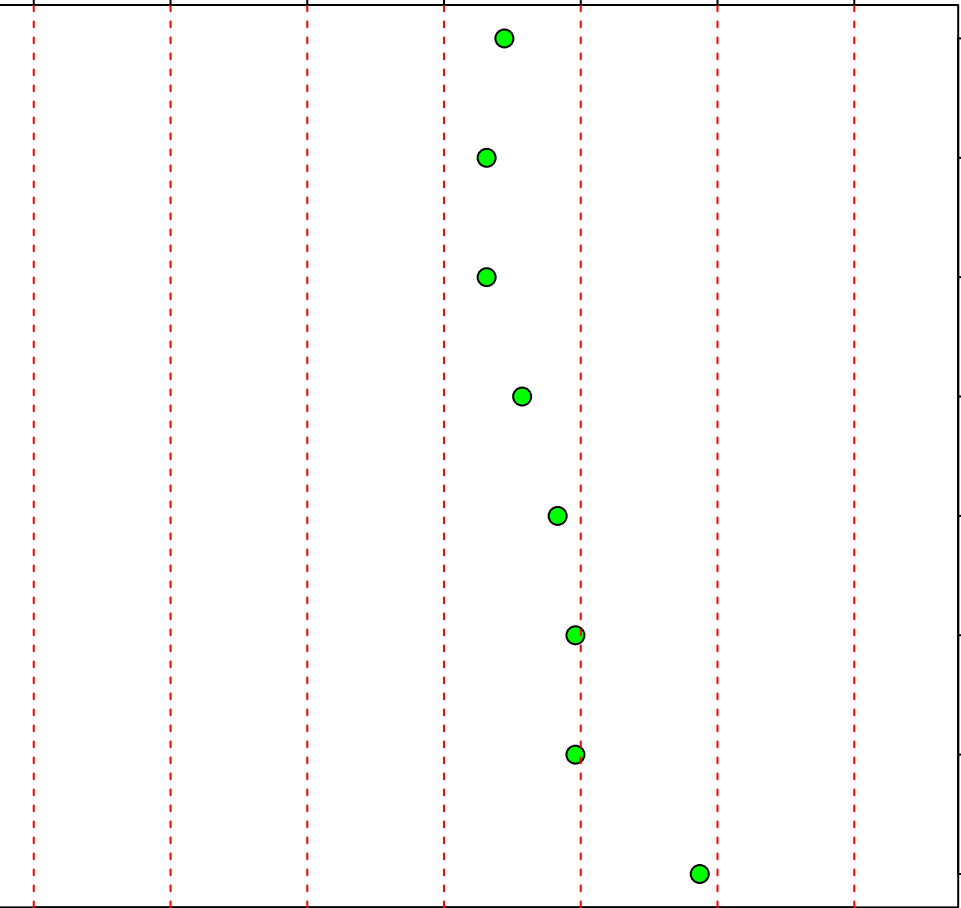

%diff 100\*(GBBS-TG43)/TG43

GBBS(solid model applicator, body, balloon & rectal contrast, packing contrast)

# Patient\_11 D2cc sigmoid

'phantom least similar to TG43'

D(Y, N, B, B)

D(Y, N, B, N)

D(Y, N, B, M)

D(N, N, N, N)

D(Y, N, N, N)

D(Y, N, M, M)

D(Y, M, X, X)

D(N, M, X, X)

'phantom most similar to TG43'

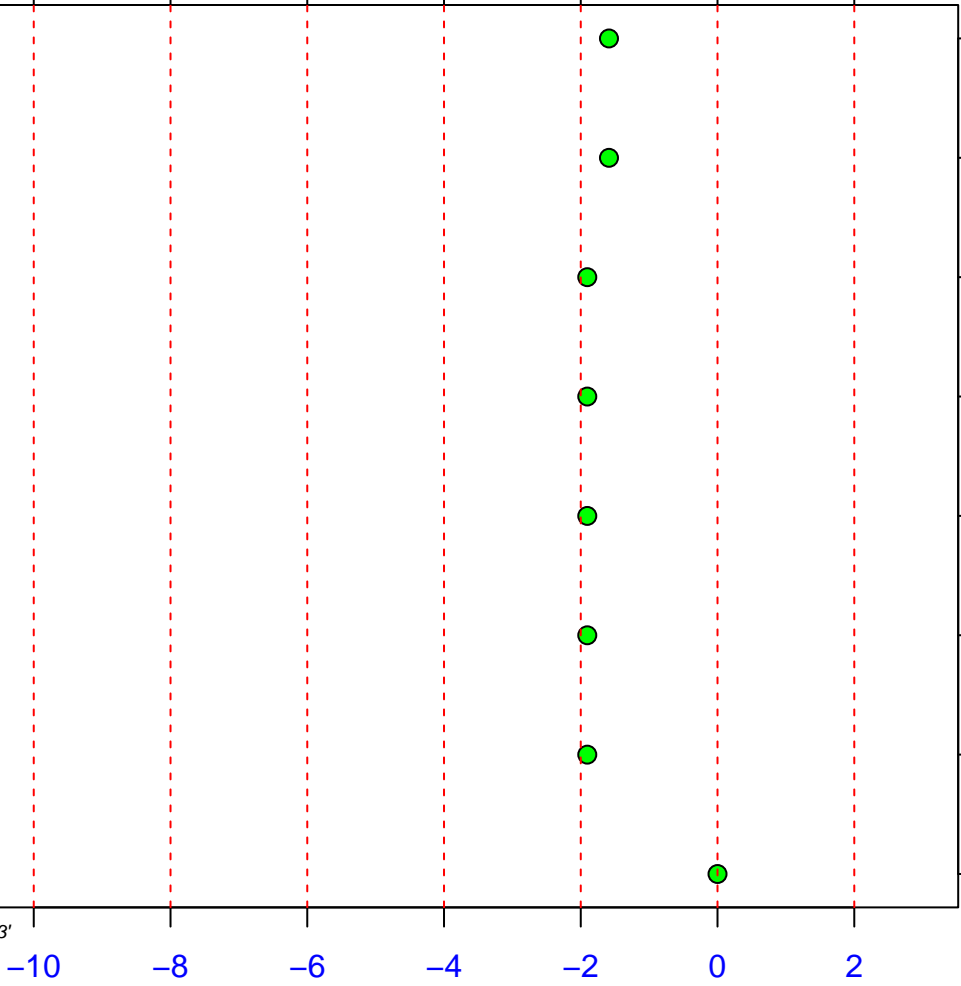

%diff 100\*(GBBS-TG43)/TG43

GBBS(solid model applicator, body, balloon & rectal contrast, packing contrast)

# Patient\_12 D2cc sigmoid

'phantom least similar to TG43'

D(Y, N, B, B)

D(Y, N, B, N)

D(Y, N, B, M)

D(N, N, N, N)

D(Y, N, N, N)

D(Y, N, M, M)

D(Y, M, X, X)

D(N, M, X, X)

'phantom most similar to TG43'

-10

-8

-6

-4

-2

0

2

%diff 100\*(GBBS-TG43)/TG43

GBBS(solid model applicator, body, balloon & rectal contrast, packing contrast)

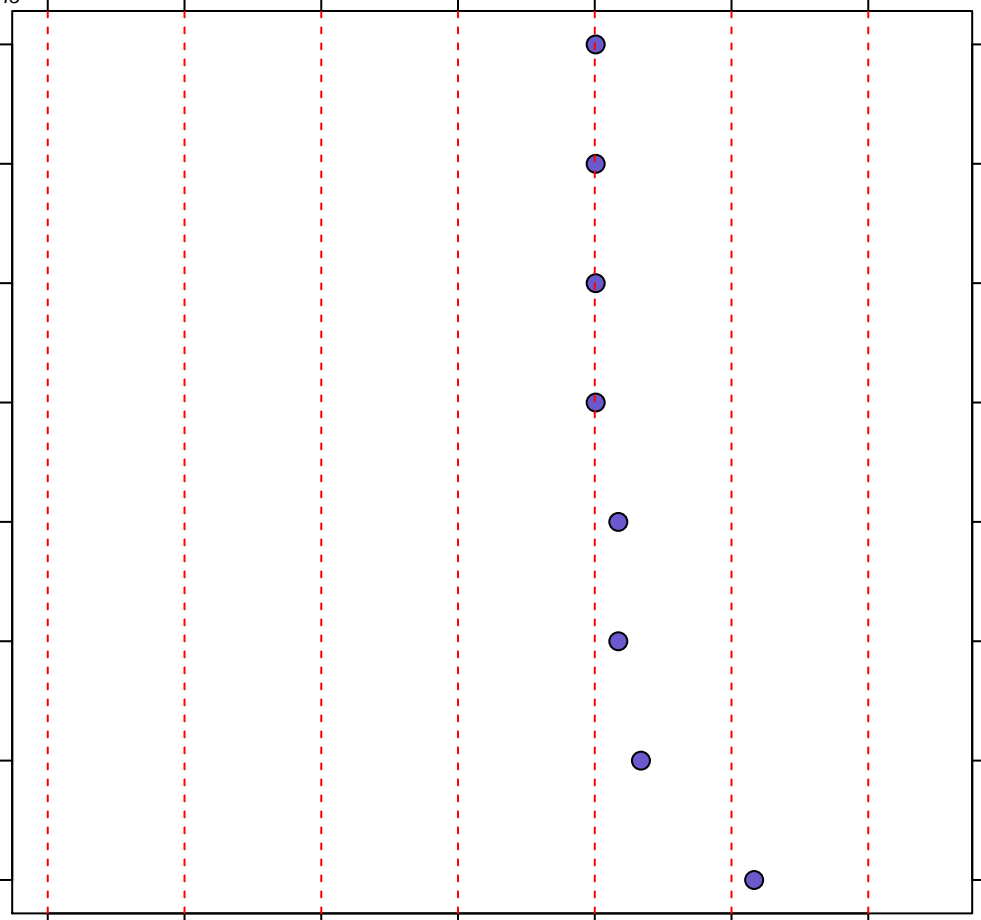

# Patient\_13 D2cc sigmoid

'phantom least similar to TG43'

- D(Y, N, B, B)
- D(Y, N, B, N)
- D(Y, N, B, M)
- D(N, N, N, N)
- D(Y, N, N, N)
- D(Y, N, M, M)
- D(Y, M, X, X)
- D(N, M, X, X)

'phantom most similar to TG43'

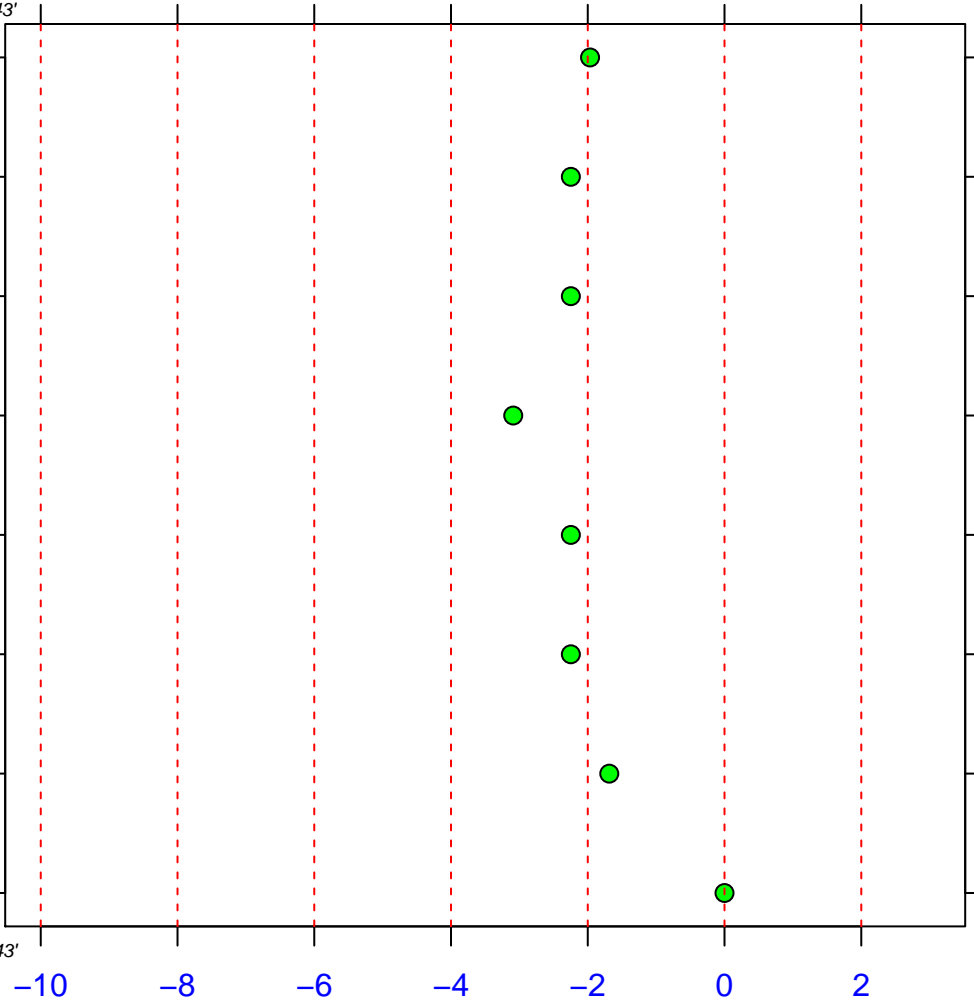

%diff 100\*(GBBS-TG43)/TG43

GBBS(solid model applicator, body, balloon & rectal contrast, packing contrast)

# Patient\_14 D2cc sigmoid

'phantom least similar to TG43'

D(Y, N, B, B)

D(Y, N, B, N)

D(Y, N, B, M)

D(N, N, N, N)

D(Y, N, N, N)

D(Y, N, M, M)

D(Y, M, X, X)

D(N, M, X, X)

'phantom most similar to TG43'



%diff 100\*(GBBS-TG43)/TG43

GBBS(solid model applicator, body, balloon & rectal contrast, packing contrast)

# Patient\_15 D2cc sigmoid

'phantom least similar to TG43'

D(Y, N, B, B)

D(Y, N, B, N)

D(Y, N, B, M)

D(N, N, N, N)

D(Y, N, N, N)

D(Y, N, M, M)

D(Y, M, X, X)

D(N, M, X, X)

'phantom most similar to TG43'

-10 -8 -6 -4 -2 0 2

%diff 100\*(GBBS-TG43)/TG43

GBBS(solid model applicator, body, balloon & rectal contrast, packing contrast)

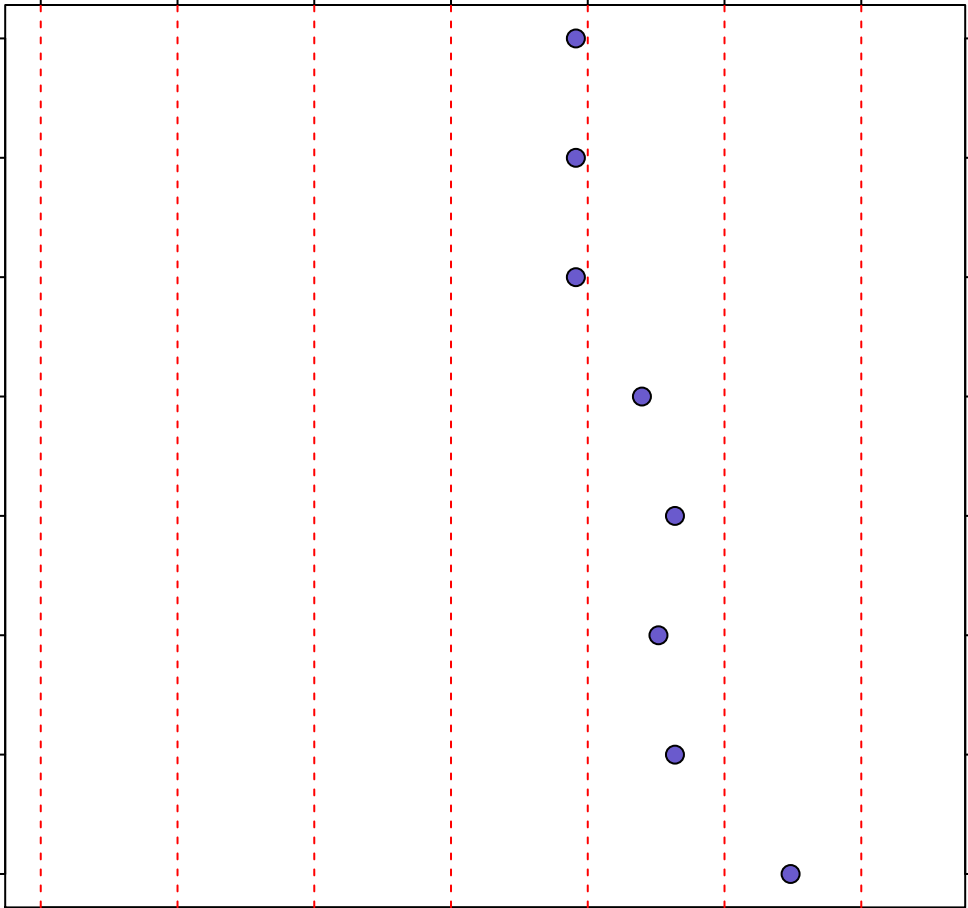



# Patient\_16 D2cc sigmoid

'phantom least similar to TG43'

D(Y, N, B, B)

D(Y, N, B, N)

D(Y, N, B, M)

D(N, N, N, N)

D(Y, N, N, N)

D(Y, N, M, M)

D(Y, M, X, X)

D(N, M, X, X)

'phantom most similar to TG43'



%diff 100\*(GBBS-TG43)/TG43

GBBS(solid model applicator, body, balloon & rectal contrast, packing contrast)

# Patient\_17 D2cc sigmoid

'phantom least similar to TG43'

- D(Y, N, B, B)
- D(Y, N, B, N)
- D(Y, N, B, M)
- D(N, N, N, N)
- D(Y, N, N, N)
- D(Y, N, M, M)
- D(Y, M, X, X)
- D(N, M, X, X)

'phantom most similar to TG43'

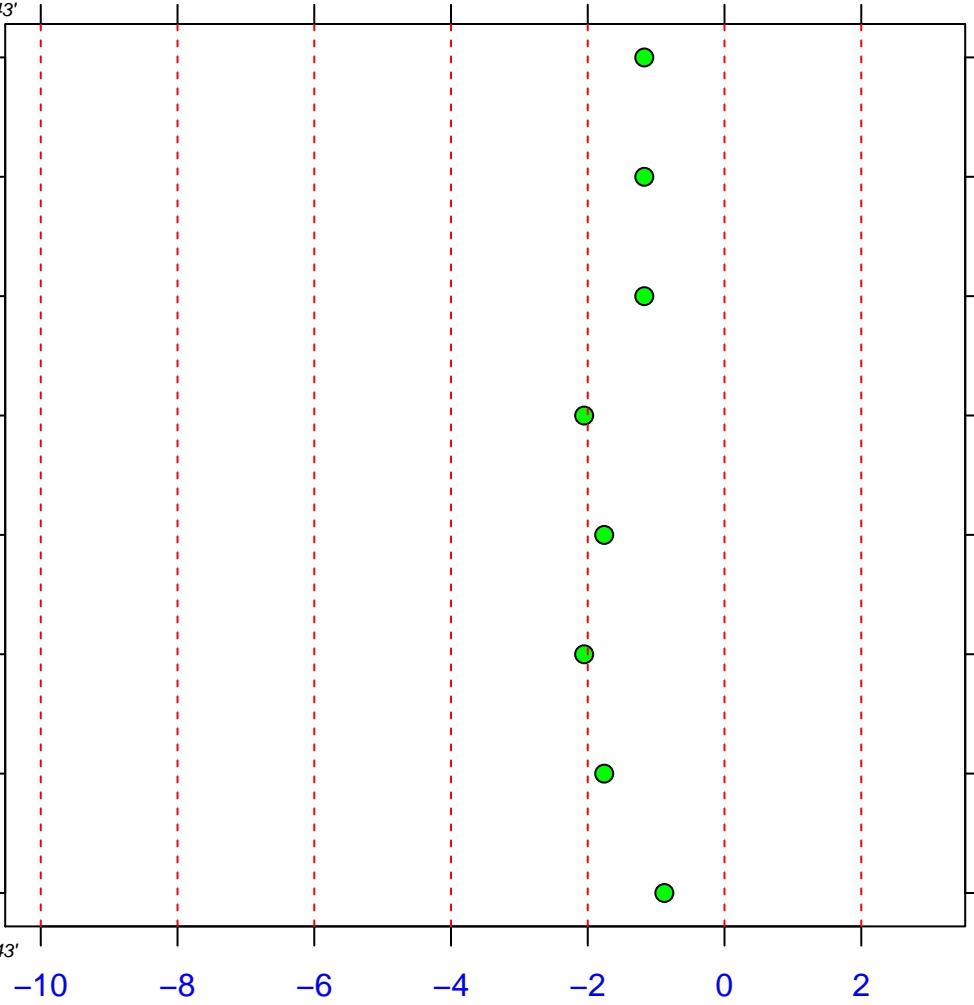

%diff 100\*(GBBS-TG43)/TG43

GBBS(solid model applicator, body, balloon & rectal contrast, packing contrast)

# Patient\_18 D2cc sigmoid

'phantom least similar to TG43'

- D(Y, N, B, B)
- D(Y, N, B, N)
- D(Y, N, B, M)
- D(N, N, N, N)
- D(Y, N, N, N)
- D(Y, N, M, M)
- D(Y, M, X, X)
- D(N, M, X, X)

'phantom most similar to TG43'

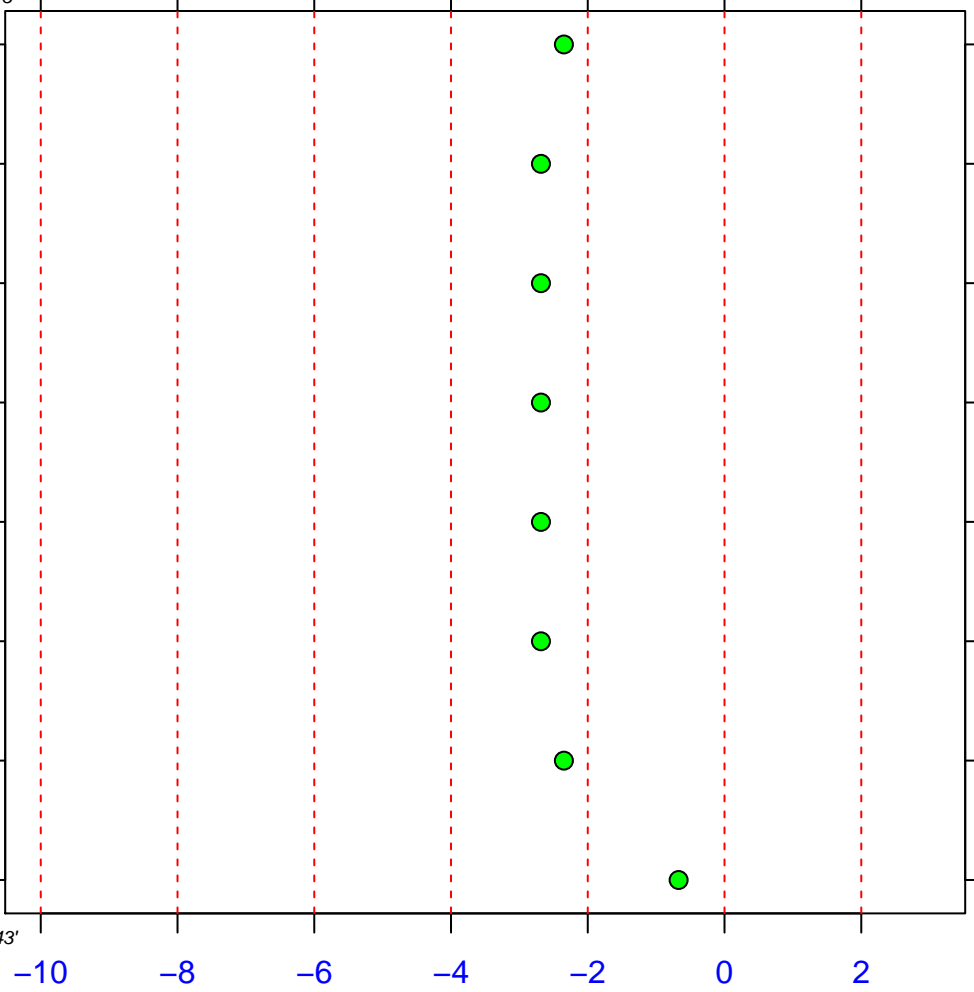

%diff 100\*(GBBS-TG43)/TG43

GBBS(solid model applicator, body, balloon & rectal contrast, packing contrast)

# Patient\_19 D2cc sigmoid

'phantom least similar to TG43'

- D(Y, N, B, B)
- D(Y, N, B, N)
- D(Y, N, B, M)
- D(N, N, N, N)
- D(Y, N, N, N)
- D(Y, N, M, M)
- D(Y, M, X, X)
- D(N, M, X, X)

'phantom most similar to TG43'

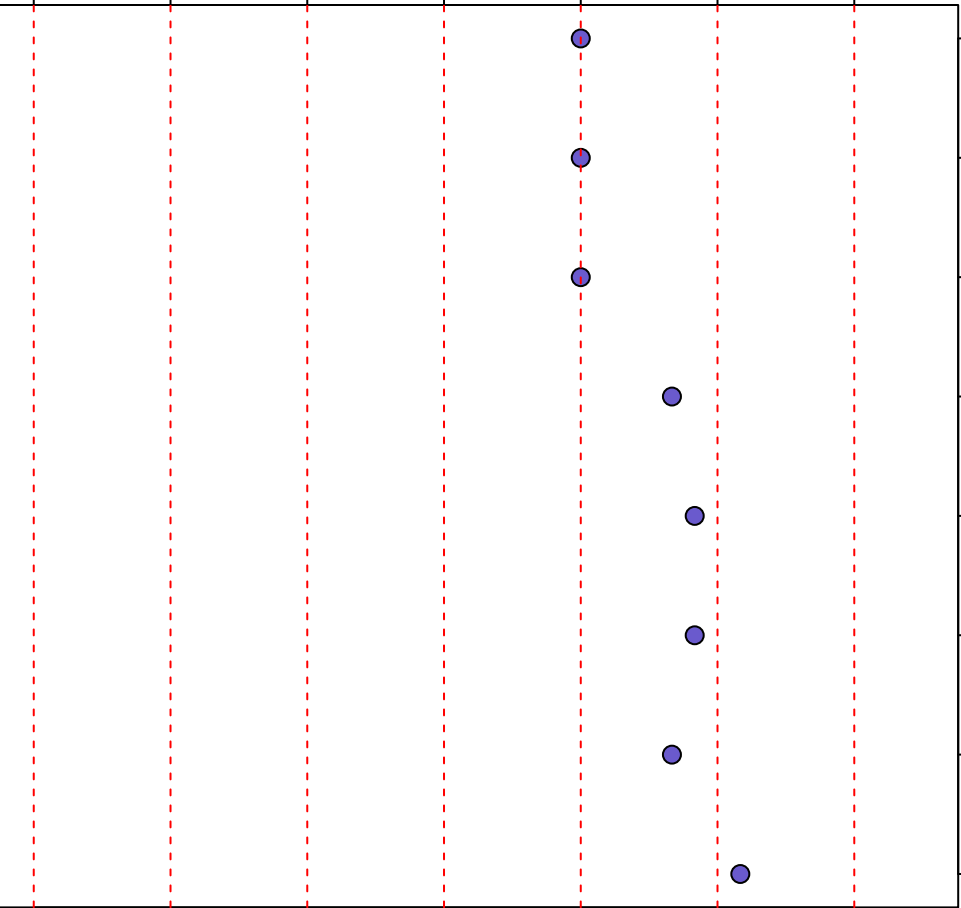

-10 -8 -6 -4 -2 0 2

%diff 100\*(GBBS-TG43)/TG43

GBBS(solid model applicator, body, balloon & rectal contrast, packing contrast)

# Patient\_20 D2cc sigmoid

'phantom least similar to TG43'

D(Y, N, B, B)

D(Y, N, B, N)

D(Y, N, B, M)

D(N, N, N, N)

D(Y, N, N, N)

D(Y, N, M, M)

D(Y, M, X, X)

D(N, M, X, X)

'phantom most similar to TG43'

-10 -8 -6 -4 -2 0 2

%diff 100\*(GBBS-TG43)/TG43

GBBS(solid model applicator, body, balloon & rectal contrast, packing contrast)

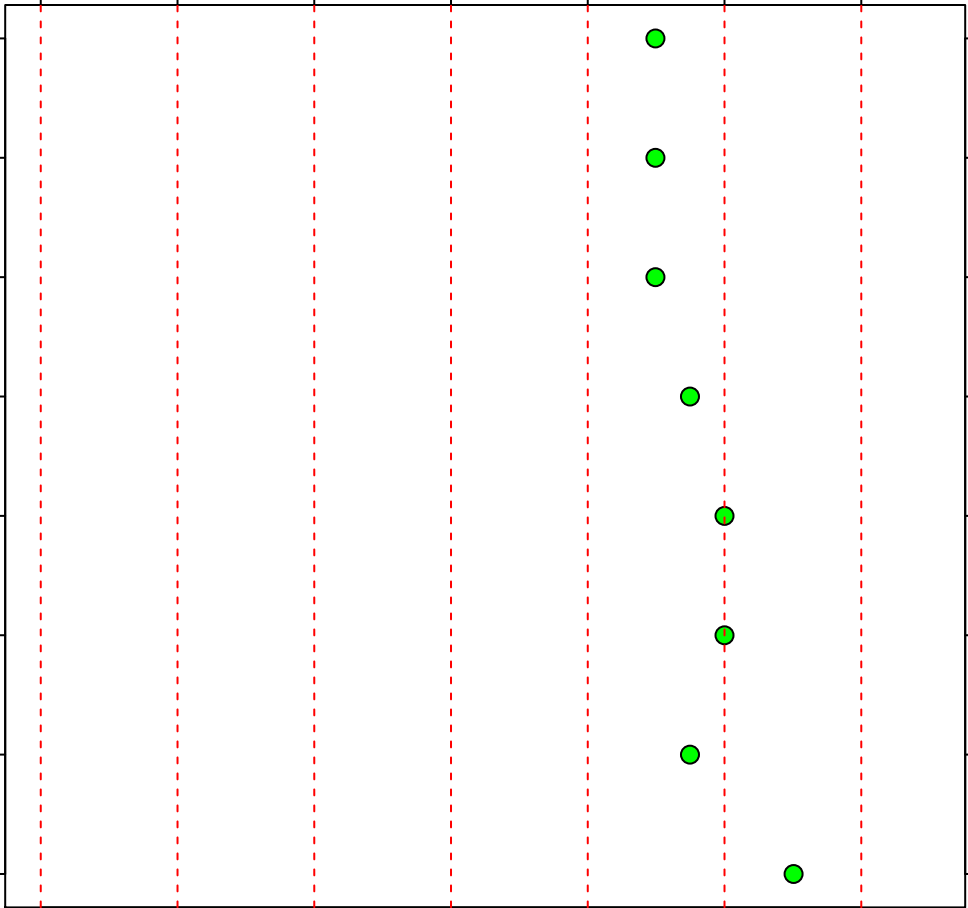

# Patient\_21 D2cc sigmoid

'phantom least similar to TG43'

D(Y, N, B, B)

D(Y, N, B, N)

D(Y, N, B, M)

D(N, N, N, N)

D(Y, N, N, N)

D(Y, N, M, M)

D(Y, M, X, X)

D(N, M, X, X)

'phantom most similar to TG43'

-10

-8

-6

-4

-2

0

2

%diff 100\*(GBBS-TG43)/TG43

GBBS(solid model applicator, body, balloon & rectal contrast, packing contrast)

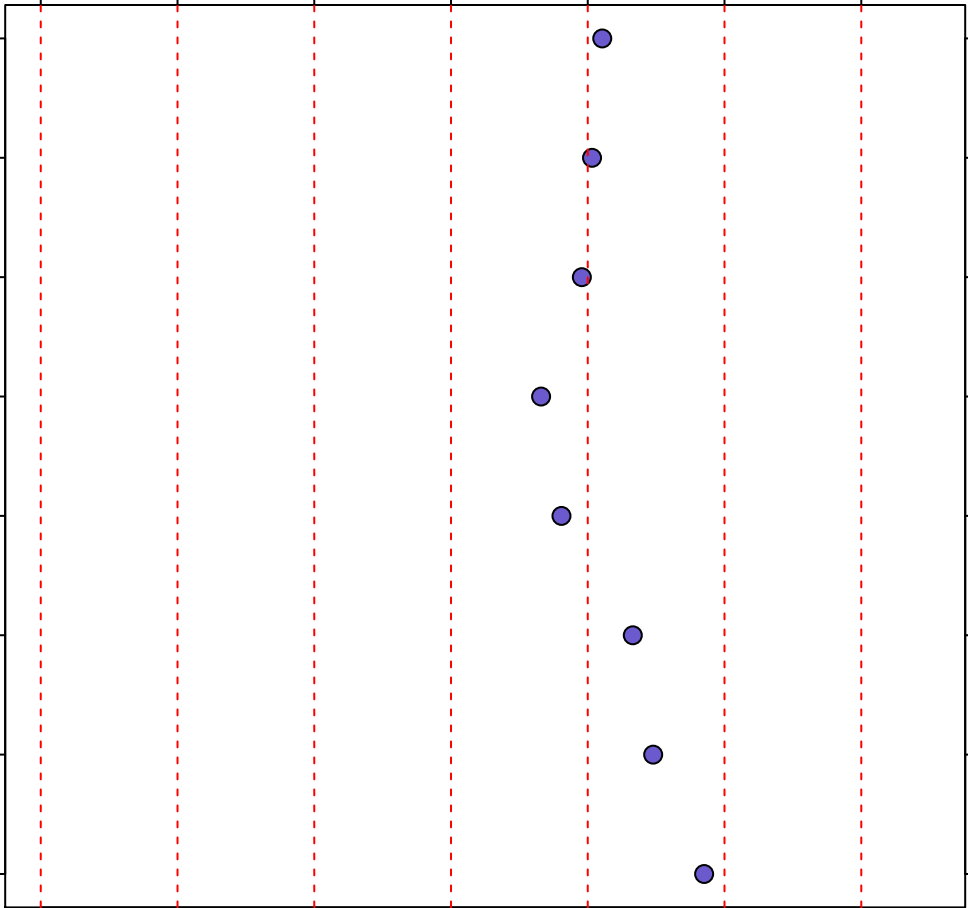

# Patient\_22 D2cc sigmoid

'phantom least similar to TG43'

D(Y, N, B, B)

D(Y, N, B, N)

D(Y, N, B, M)

D(N, N, N, N)

D(Y, N, N, N)

D(Y, N, M, M)

D(Y, M, X, X)

D(N, M, X, X)

'phantom most similar to TG43'

-10 -8 -6 -4 -2 0 2

%diff 100\*(GBBS-TG43)/TG43

GBBS(solid model applicator, body, balloon & rectal contrast, packing contrast)

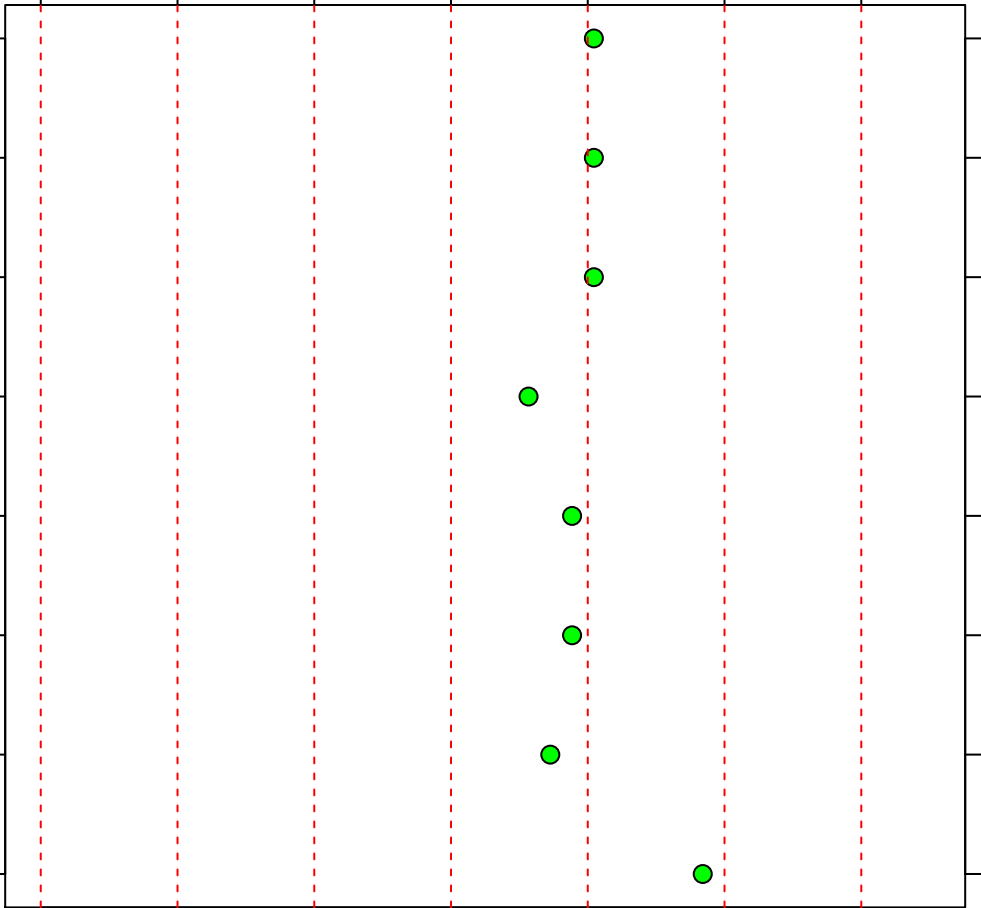

# Patient\_23 D2cc sigmoid

'phantom least similar to TG43'

D(Y, N, B, B)

D(Y, N, B, N)

D(Y, N, B, M)

D(N, N, N, N)

D(Y, N, N, N)

D(Y, N, M, M)

D(Y, M, X, X)

D(N, M, X, X)

'phantom most similar to TG43'



%diff 100\*(GBBS-TG43)/TG43

GBBS(solid model applicator, body, balloon & rectal contrast, packing contrast)



# Patient\_24 D2cc sigmoid

'phantom least similar to TG43'

D(Y, N, B, B)

D(Y, N, B, N)

D(Y, N, B, M)

D(N, N, N, N)

D(Y, N, N, N)

D(Y, N, M, M)

D(Y, M, X, X)

D(N, M, X, X)

'phantom most similar to TG43'



%diff 100\*(GBBS-TG43)/TG43

GBBS(solid model applicator, body, balloon & rectal contrast, packing contrast)

# Patient\_25 D2cc sigmoid

'phantom least similar to TG43'

D(Y, N, B, B)

D(Y, N, B, N)

D(Y, N, B, M)

D(N, N, N, N)

D(Y, N, N, N)

D(Y, N, M, M)

D(Y, M, X, X)

D(N, M, X, X)

'phantom most similar to TG43'

-10

-8

-6

-4

-2

0

2

%diff 100\*(GBBS-TG43)/TG43

GBBS(solid model applicator, body, balloon & rectal contrast, packing contrast)

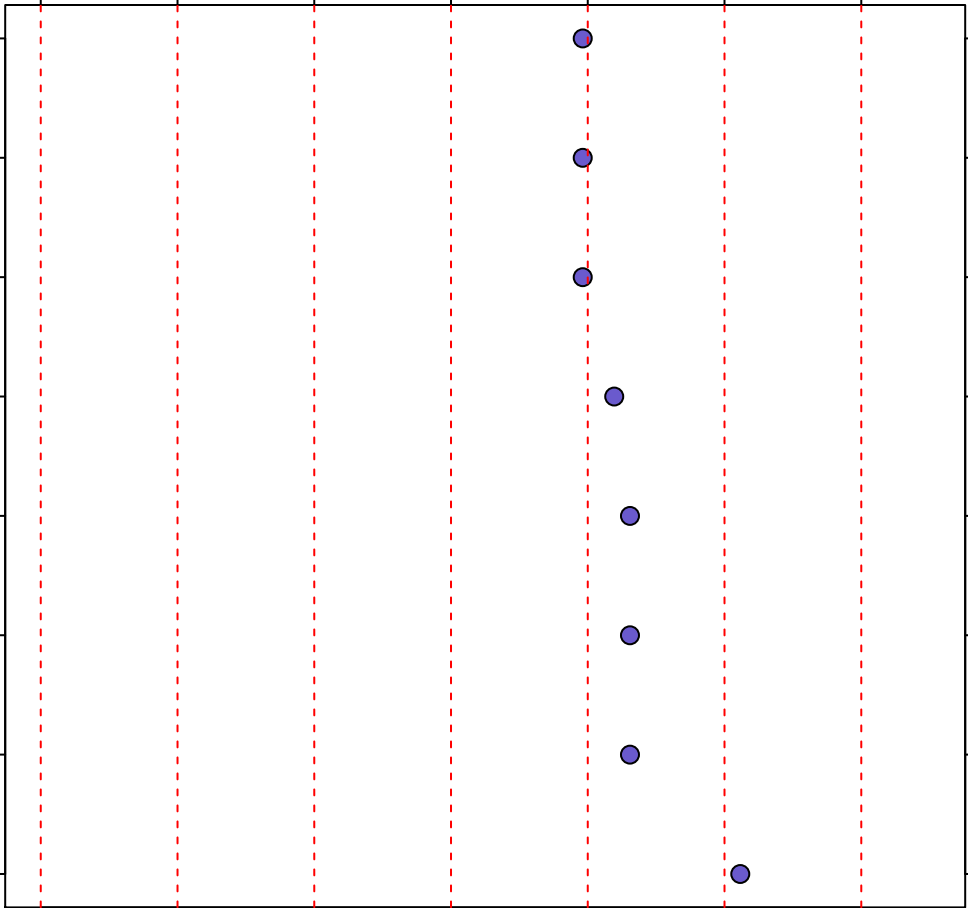

# Patient\_26 D2cc sigmoid

'phantom least similar to TG43'

- D(Y, N, B, B)
- D(Y, N, B, N)
- D(Y, N, B, M)
- D(N, N, N, N)
- D(Y, N, N, N)
- D(Y, N, M, M)
- D(Y, M, X, X)
- D(N, M, X, X)

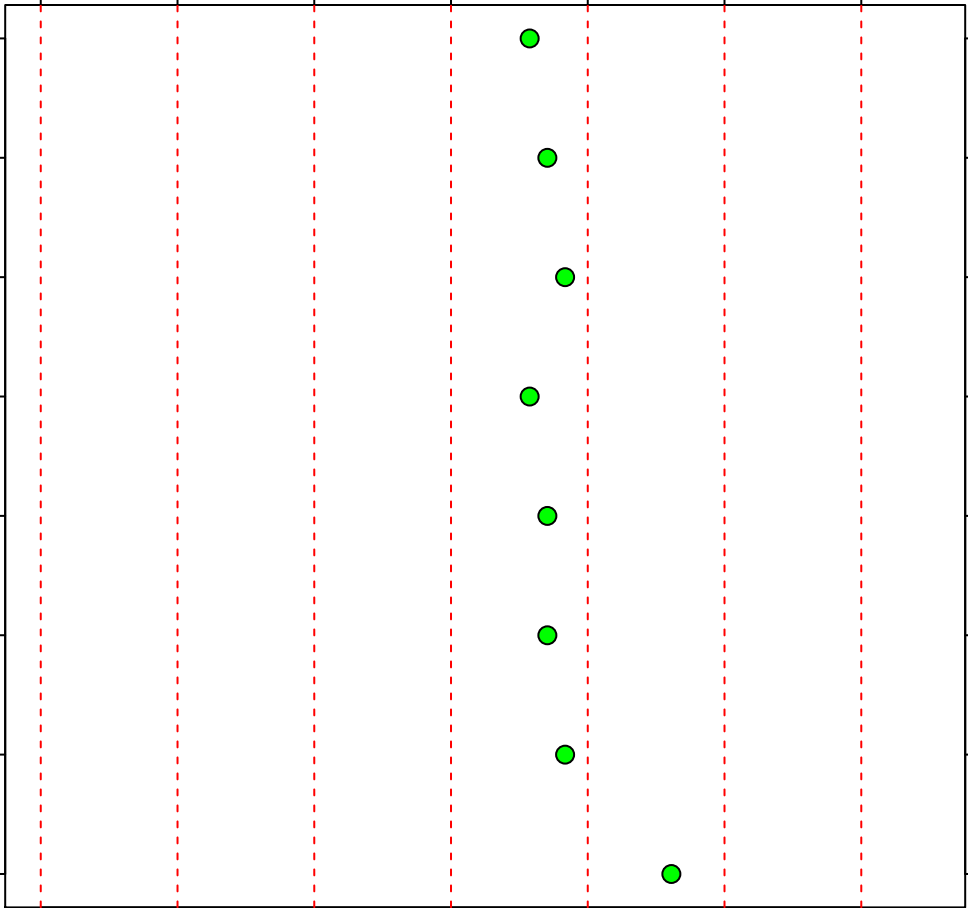

'phantom most similar to TG43'

%diff 100\*(GBBS-TG43)/TG43

GBBS(solid model applicator, body, balloon & rectal contrast, packing contrast)

# Patient\_01 balloon center

'phantom least similar to TG43'

D(Y, N, B, B)

D(Y, N, B, N)

D(Y, N, B, M)

D(N, N, N, N)

D(Y, N, N, N)

D(Y, N, M, M)

D(Y, M, X, X)

D(N, M, X, X)

'phantom most similar to TG43'

-10

-8

-6

-4

-2

0

2

%diff 100\*(GBBS-TG43)/TG43

GBBS(solid model applicator, body, balloon & rectal contrast, packing contrast)

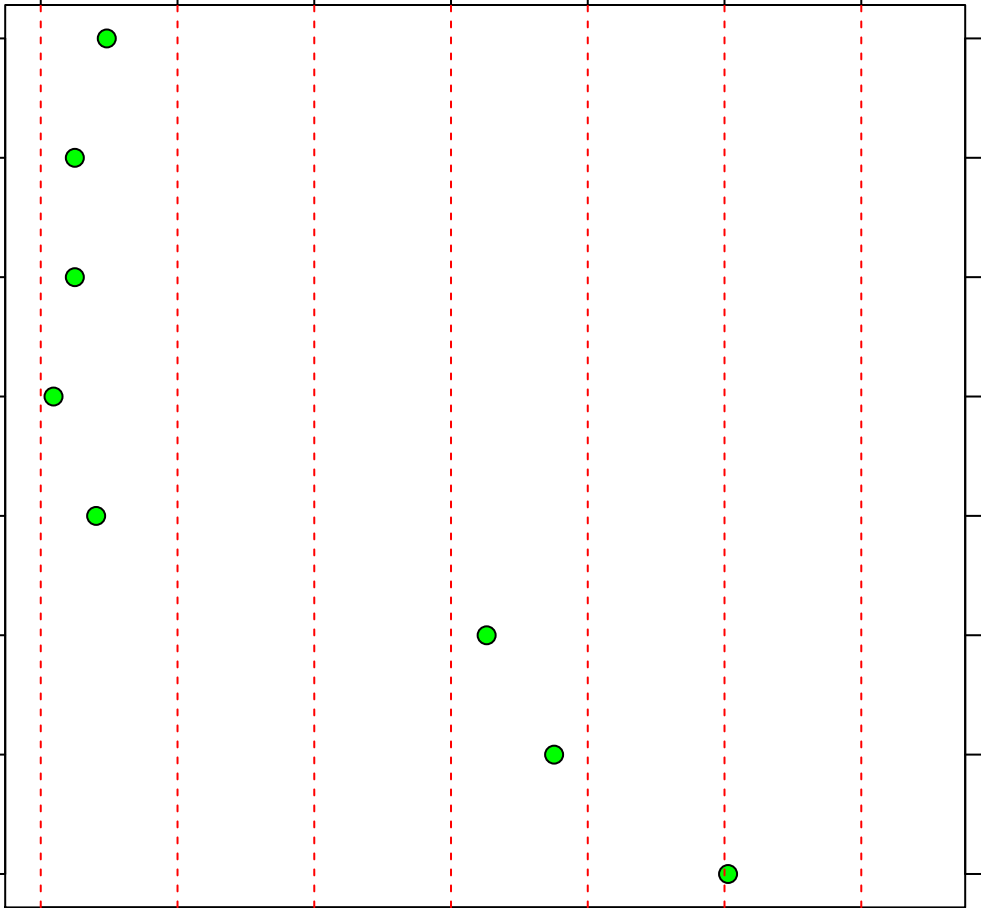

# Patient\_02 balloon center

'phantom least similar to TG43'

- D(Y, N, B, B)
- D(Y, N, B, N)
- D(Y, N, B, M)
- D(N, N, N, N)
- D(Y, N, N, N)
- D(Y, N, M, M)
- D(Y, M, X, X)
- D(N, M, X, X)

'phantom most similar to TG43'

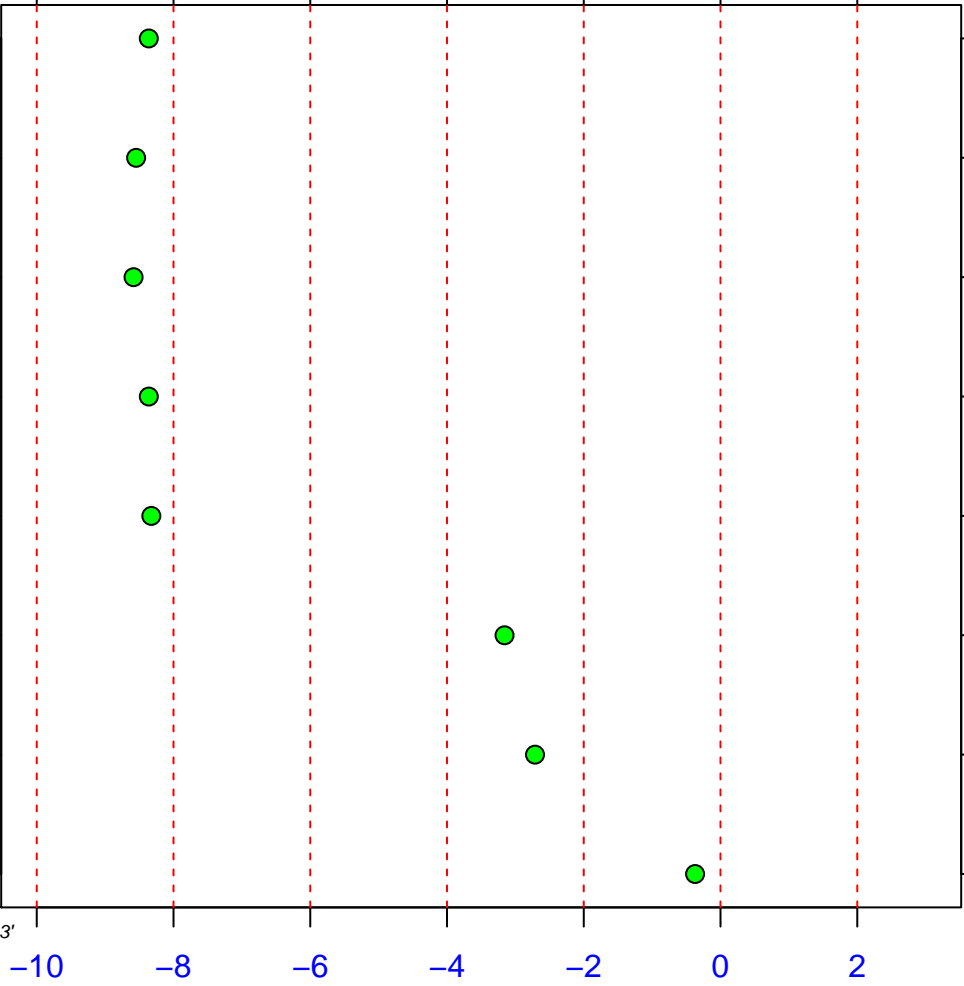

%diff 100\*(GBBS-TG43)/TG43

GBBS(solid model applicator, body, balloon & rectal contrast, packing contrast)

# Patient\_03 balloon center

'phantom least similar to TG43'

D(Y, N, B, B)

D(Y, N, B, N)

D(Y, N, B, M)

D(N, N, N, N)

D(Y, N, N, N)

D(Y, N, M, M)

D(Y, M, X, X)

D(N, M, X, X)

'phantom most similar to TG43'

-10 -8 -6 -4 -2 0 2

%diff 100\*(GBBS-TG43)/TG43

GBBS(solid model applicator, body, balloon & rectal contrast, packing contrast)

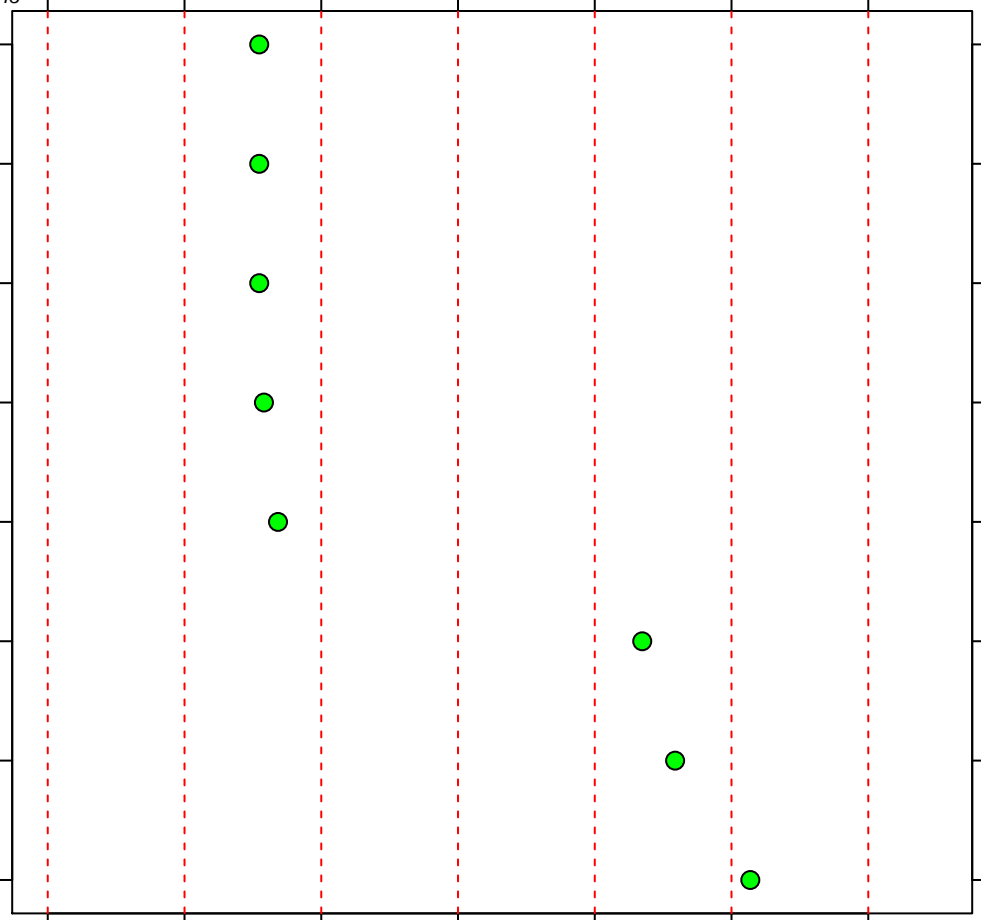

# Patient\_04 balloon center

'phantom least similar to TG43'

D(Y, N, B, B)

D(Y, N, B, N)

D(Y, N, B, M)

D(N, N, N, N)

D(Y, N, N, N)

D(Y, N, M, M)

D(Y, M, X, X)

D(N, M, X, X)

'phantom most similar to TG43'

-10

-8

-6

-4

-2

0

2

%diff 100\*(GBBS-TG43)/TG43

GBBS(solid model applicator, body, balloon & rectal contrast, packing contrast)

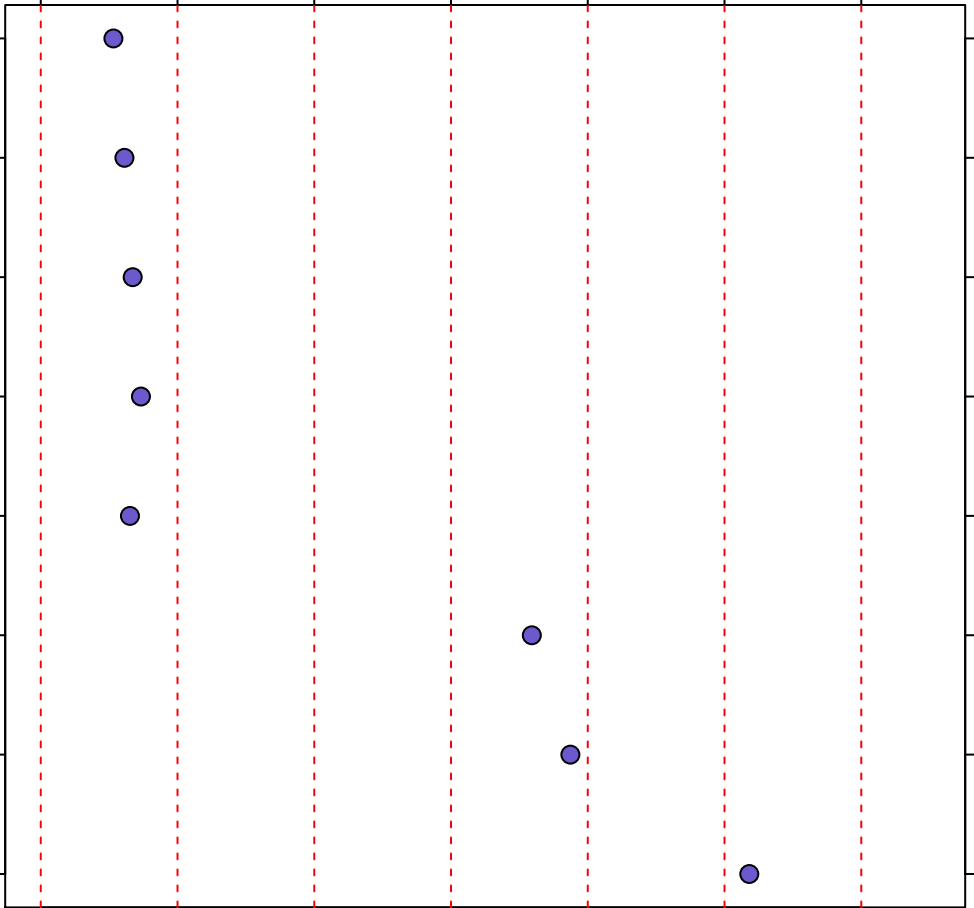

# Patient\_05 balloon center

'phantom least similar to TG43'

- D(Y, N, B, B)
- D(Y, N, B, N)
- D(Y, N, B, M)
- D(N, N, N, N)
- D(Y, N, N, N)
- D(Y, N, M, M)
- D(Y, M, X, X)
- D(N, M, X, X)

'phantom most similar to TG43'

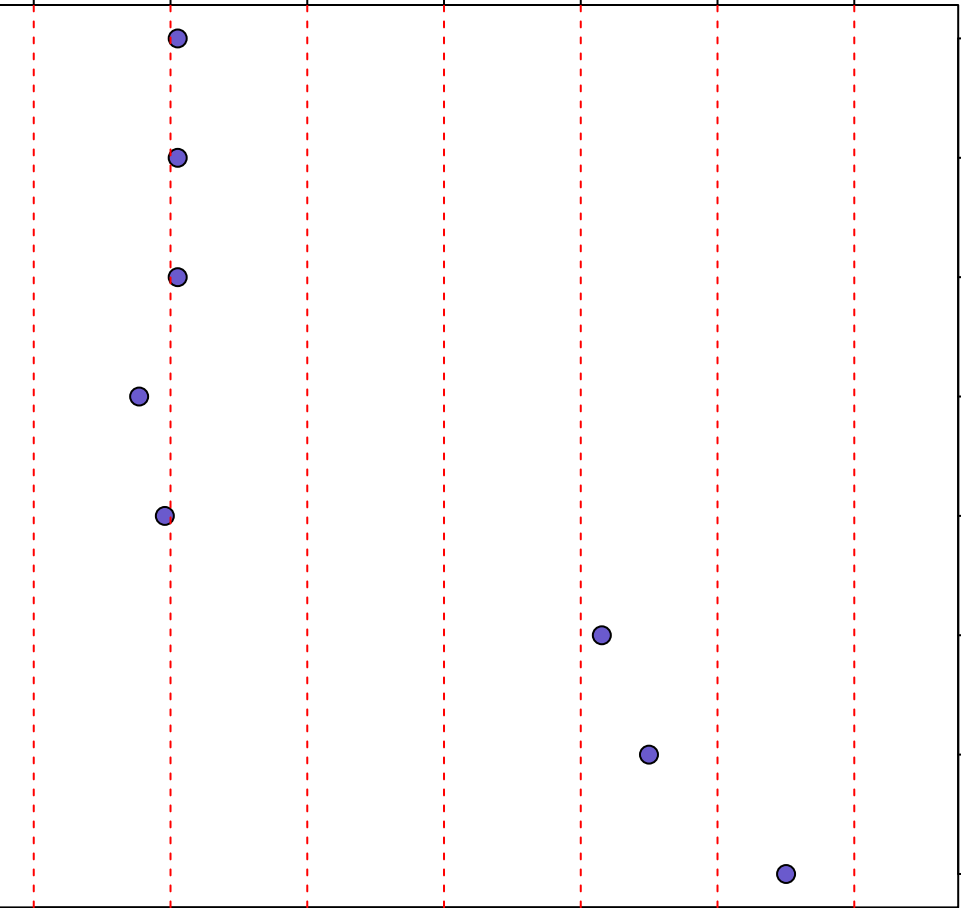

-10 -8 -6 -4 -2 0 2

%diff 100\*(GBBS-TG43)/TG43

GBBS(solid model applicator, body, balloon & rectal contrast, packing contrast)



# Patient\_06 balloon center

'phantom least similar to TG43'

- D(Y, N, B, B)
- D(Y, N, B, N)
- D(Y, N, B, M)
- D(N, N, N, N)
- D(Y, N, N, N)
- D(Y, N, M, M)
- D(Y, M, X, X)
- D(N, M, X, X)

'phantom most similar to TG43'

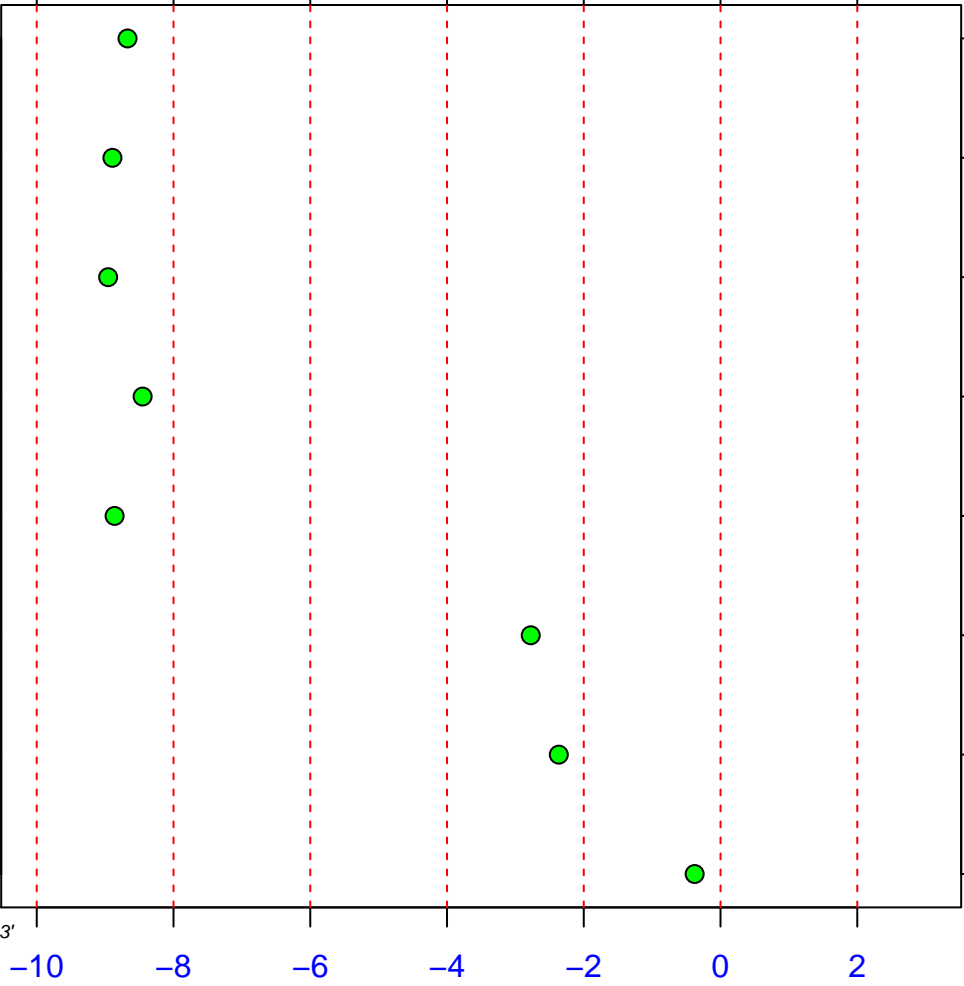

%diff 100\*(GBBS-TG43)/TG43

GBBS(solid model applicator, body, balloon & rectal contrast, packing contrast)

**Patient\_07 balloon center**

'phantom least similar to TG43'

D(Y, N, B, B)

D(Y, N, B, N)

D(Y, N, B, M)

D(N, N, N, N)

D(Y, N, N, N)

D(Y, N, M, M)

D(Y, M, X, X)

D(N, M, X, X)

'phantom most similar to TG43'

-10 -8 -6 -4 -2 0 2

%diff 100\*(GBBS-TG43)/TG43

GBBS(solid model applicator, body, balloon & rectal contrast, packing contrast)

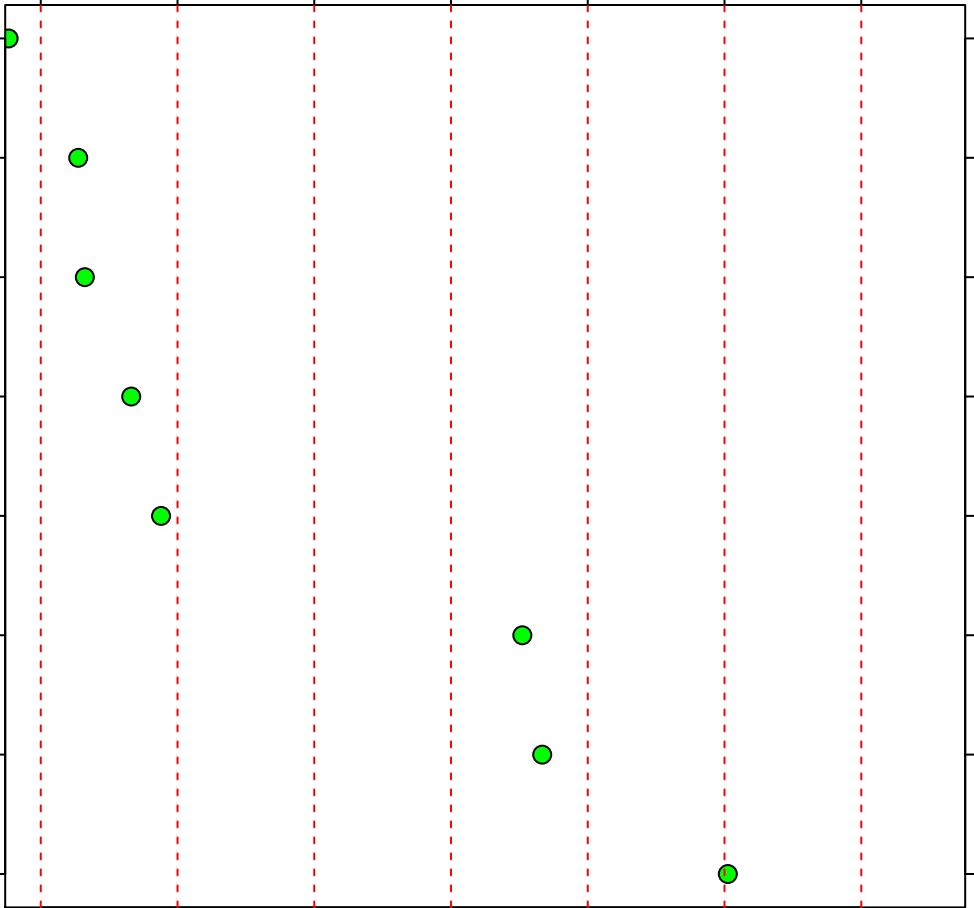

# Patient\_08 balloon center

'phantom least similar to TG43'

D(Y, N, B, B)

D(Y, N, B, N)

D(Y, N, B, M)

D(N, N, N, N)

D(Y, N, N, N)

D(Y, N, M, M)

D(Y, M, X, X)

D(N, M, X, X)

'phantom most similar to TG43'

-10 -8 -6 -4 -2 0 2

%diff 100\*(GBBS-TG43)/TG43

GBBS(solid model applicator, body, balloon & rectal contrast, packing contrast)

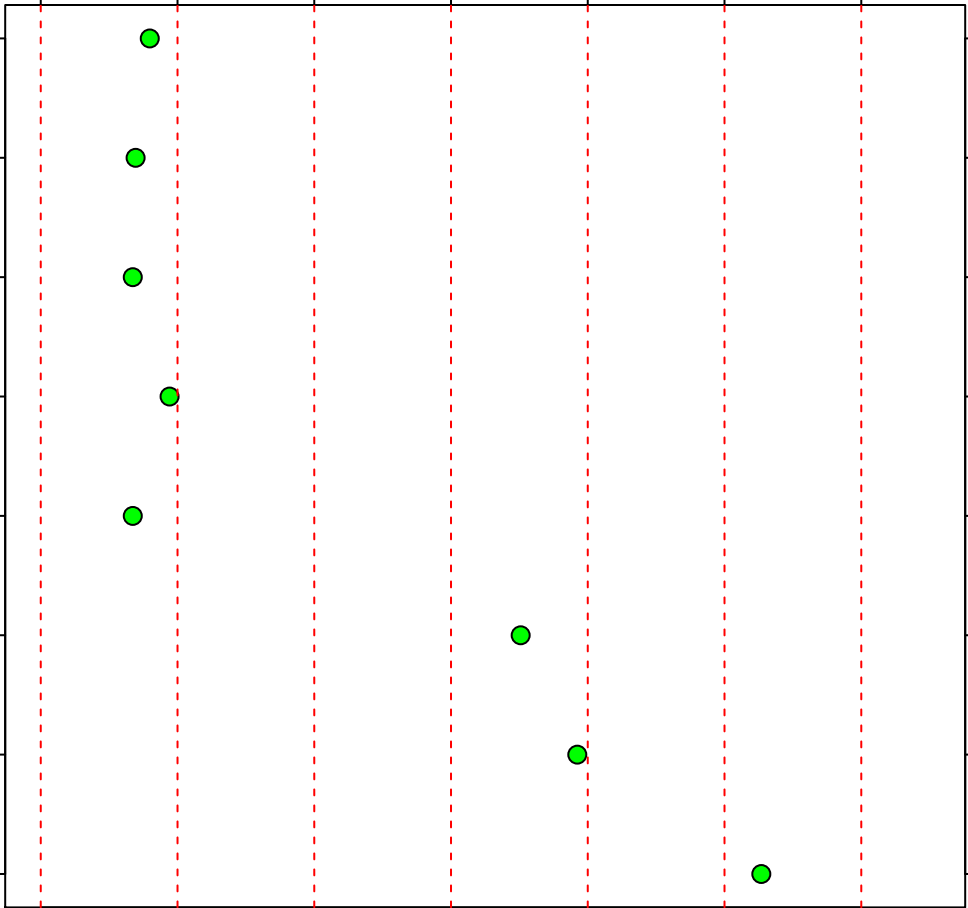

# Patient\_09 balloon center

'phantom least similar to TG43'

- D(Y, N, B, B)
- D(Y, N, B, N)
- D(Y, N, B, M)
- D(N, N, N, N)
- D(Y, N, N, N)
- D(Y, N, M, M)
- D(Y, M, X, X)
- D(N, M, X, X)

'phantom most similar to TG43'

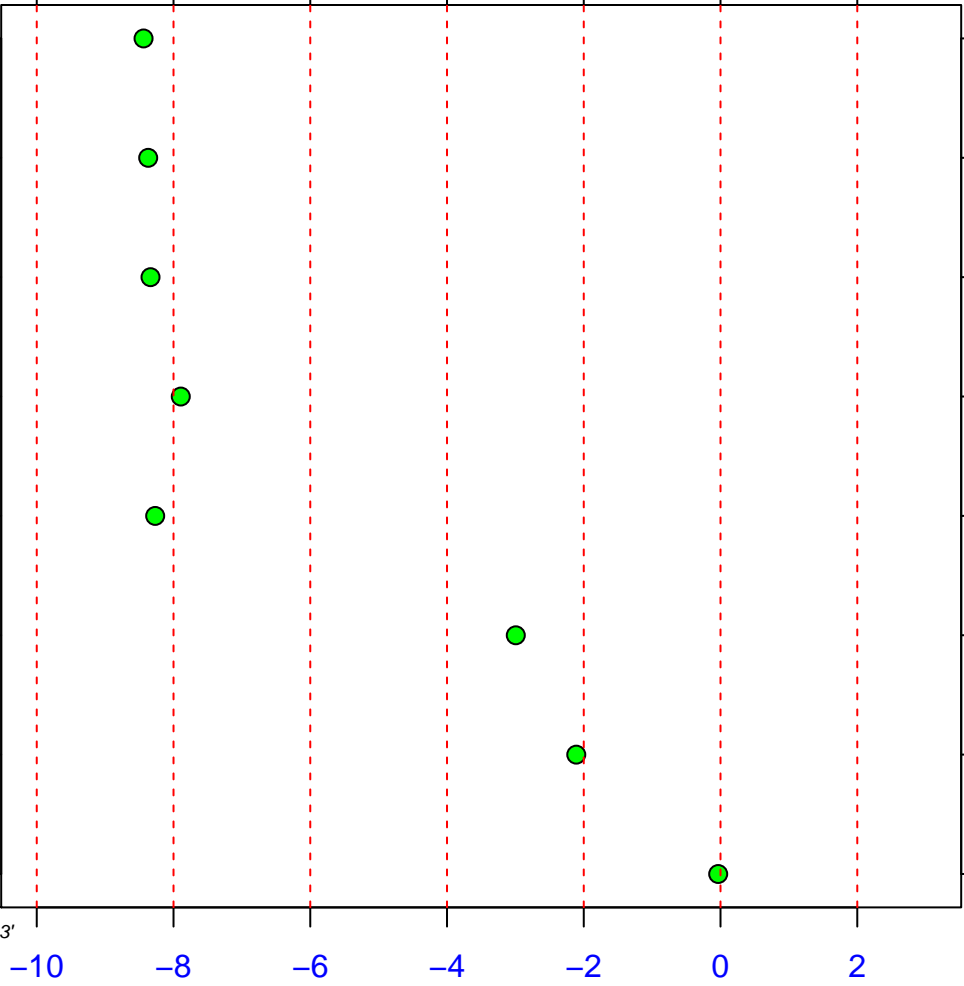

%diff 100\*(GBBS-TG43)/TG43

GBBS(solid model applicator, body, balloon & rectal contrast, packing contrast)

# Patient\_10 balloon center

'phantom least similar to TG43'

D(Y, N, B, B)

D(Y, N, B, N)

D(Y, N, B, M)

D(N, N, N, N)

D(Y, N, N, N)

D(Y, N, M, M)

D(Y, M, X, X)

D(N, M, X, X)

'phantom most similar to TG43'

-10

-8

-6

-4

-2

0

2

%diff 100\*(GBBS-TG43)/TG43

GBBS(solid model applicator, body, balloon & rectal contrast, packing contrast)

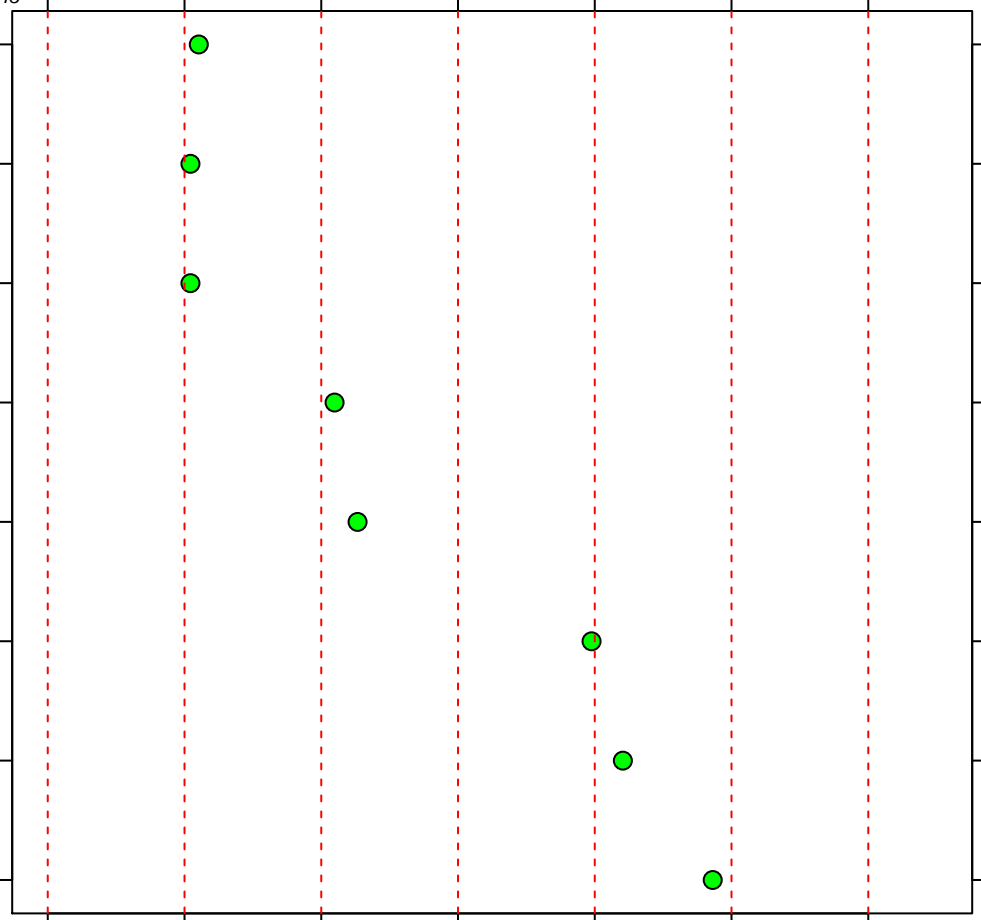

# Patient\_11 balloon center

'phantom least similar to TG43'

- D(Y, N, B, B)
- D(Y, N, B, N)
- D(Y, N, B, M)
- D(N, N, N, N)
- D(Y, N, N, N)
- D(Y, N, M, M)
- D(Y, M, X, X)
- D(N, M, X, X)

'phantom most similar to TG43'

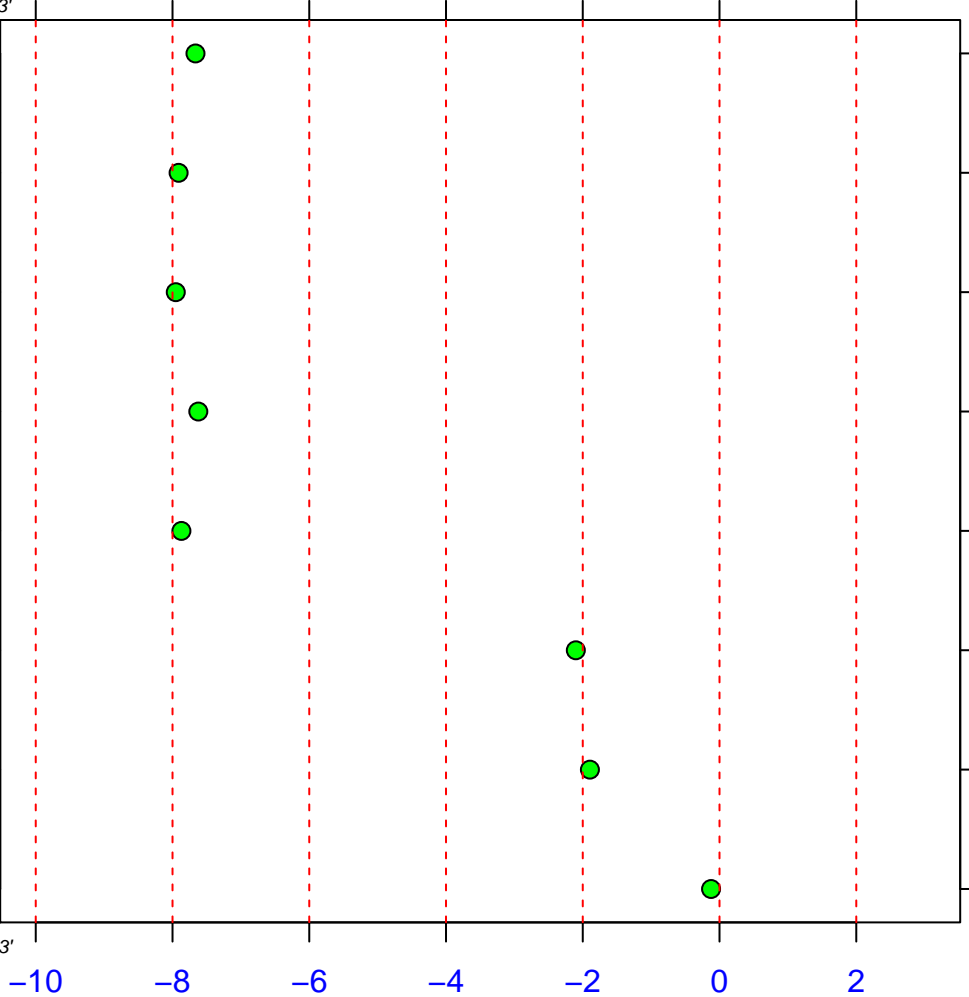

%diff 100\*(GBBS-TG43)/TG43

GBBS(solid model applicator, body, balloon & rectal contrast, packing contrast)

# Patient\_12 balloon center

'phantom least similar to TG43'

D(Y, N, B, B)

D(Y, N, B, N)

D(Y, N, B, M)

D(N, N, N, N)

D(Y, N, N, N)

D(Y, N, M, M)

D(Y, M, X, X)

D(N, M, X, X)

'phantom most similar to TG43'

-10 -8 -6 -4 -2 0 2

%diff 100\*(GBBS-TG43)/TG43

GBBS(solid model applicator, body, balloon & rectal contrast, packing contrast)

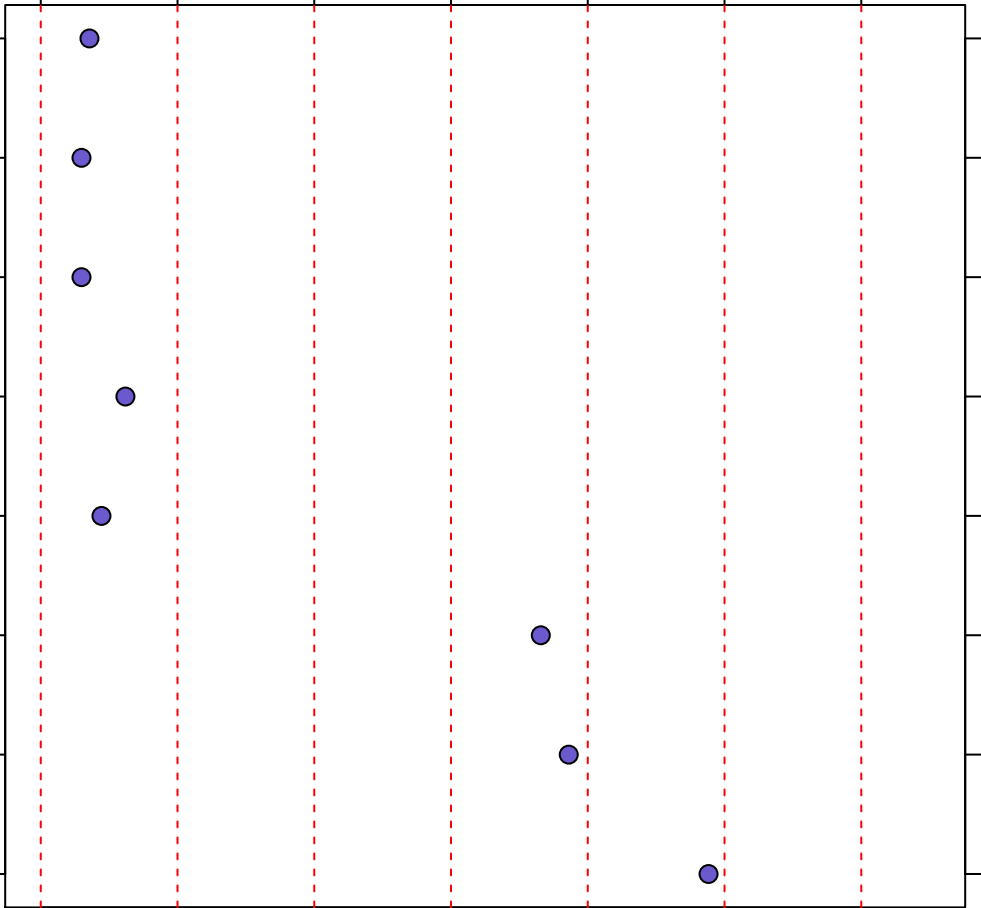

# Patient\_13 balloon center

'phantom least similar to TG43'

D(Y, N, B, B)

D(Y, N, B, N)

D(Y, N, B, M)

D(N, N, N, N)

D(Y, N, N, N)

D(Y, N, M, M)

D(Y, M, X, X)

D(N, M, X, X)

'phantom most similar to TG43'

-10

-8

-6

-4

-2

0

2

%diff 100\*(GBBS-TG43)/TG43

GBBS(solid model applicator, body, balloon & rectal contrast, packing contrast)

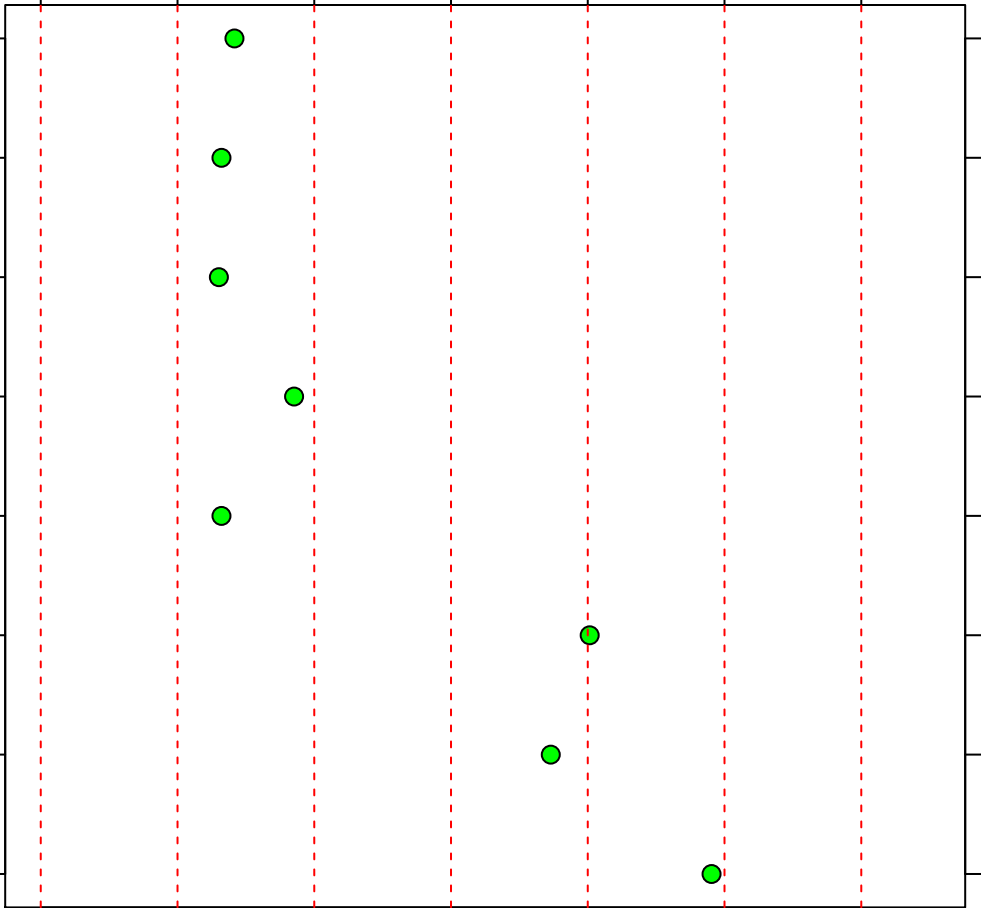



# Patient\_14 balloon center

'phantom least similar to TG43'

D(Y, N, B, B)

D(Y, N, B, N)

D(Y, N, B, M)

D(N, N, N, N)

D(Y, N, N, N)

D(Y, N, M, M)

D(Y, M, X, X)

D(N, M, X, X)

'phantom most similar to TG43'

-10 -8 -6 -4 -2 0 2

%diff 100\*(GBBS-TG43)/TG43

GBBS(solid model applicator, body, balloon & rectal contrast, packing contrast)

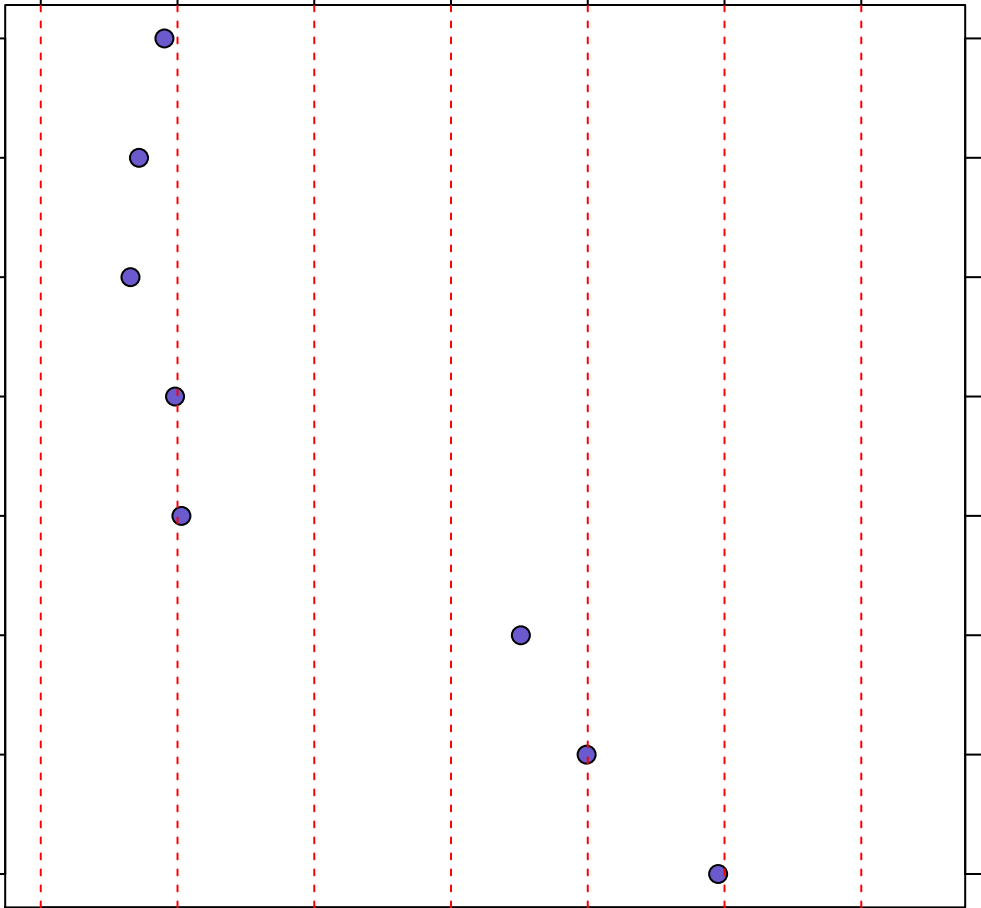

# Patient\_15 balloon center

'phantom least similar to TG43'

D(Y, N, B, B)

D(Y, N, B, N)

D(Y, N, B, M)

D(N, N, N, N)

D(Y, N, N, N)

D(Y, N, M, M)

D(Y, M, X, X)

D(N, M, X, X)

'phantom most similar to TG43'

-10 -8 -6 -4 -2 0 2

%diff 100\*(GBBS-TG43)/TG43

GBBS(solid model applicator, body, balloon & rectal contrast, packing contrast)

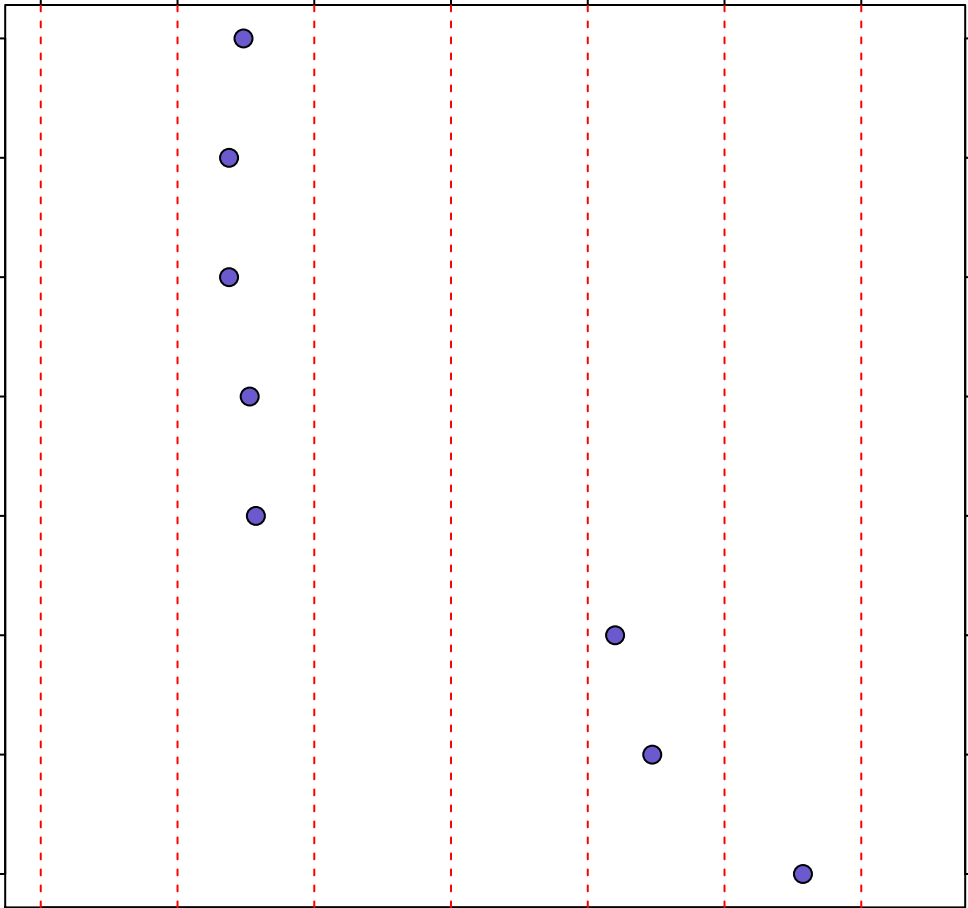

# Patient\_16 balloon center

'phantom least similar to TG43'

- D(Y, N, B, B)
- D(Y, N, B, N)
- D(Y, N, B, M)
- D(N, N, N, N)
- D(Y, N, N, N)
- D(Y, N, M, M)
- D(Y, M, X, X)
- D(N, M, X, X)

'phantom most similar to TG43'

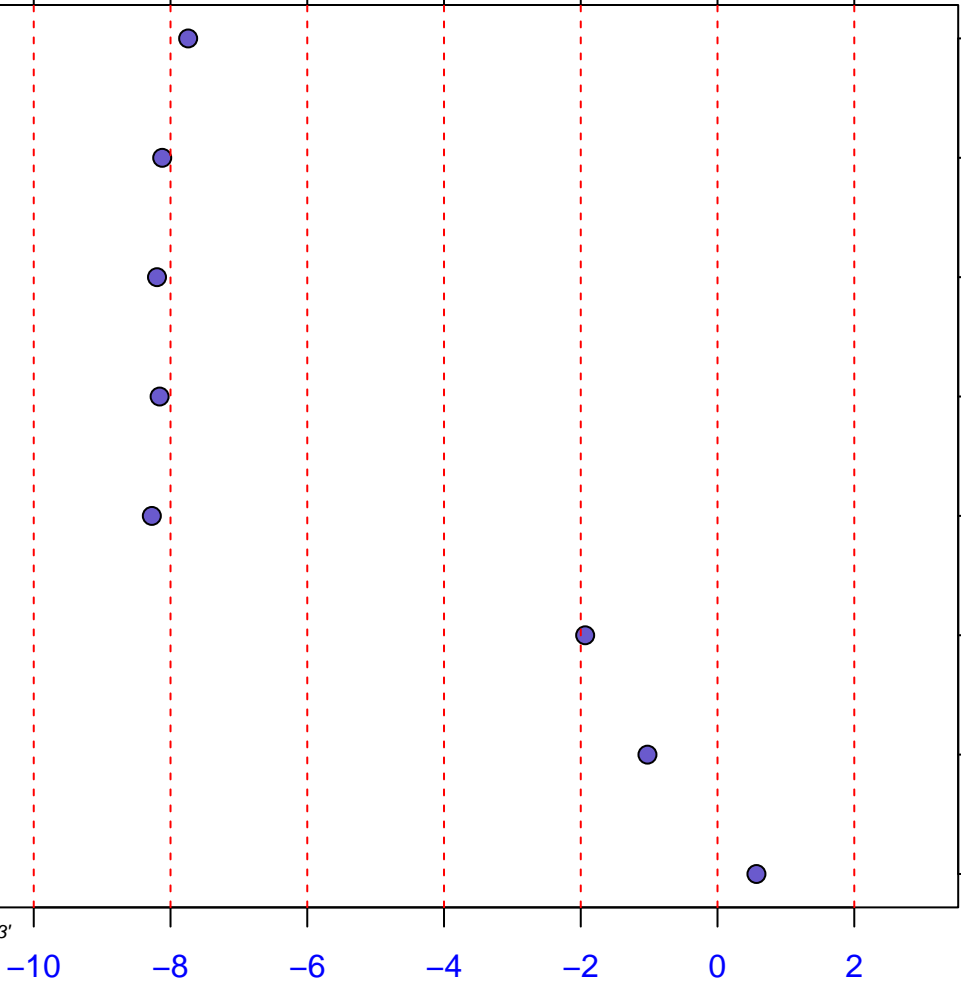

%diff 100\*(GBBS-TG43)/TG43

GBBS(solid model applicator, body, balloon & rectal contrast, packing contrast)

# Patient\_17 balloon center

'phantom least similar to TG43'

D(Y, N, B, B)

D(Y, N, B, N)

D(Y, N, B, M)

D(N, N, N, N)

D(Y, N, N, N)

D(Y, N, M, M)

D(Y, M, X, X)

D(N, M, X, X)

'phantom most similar to TG43'

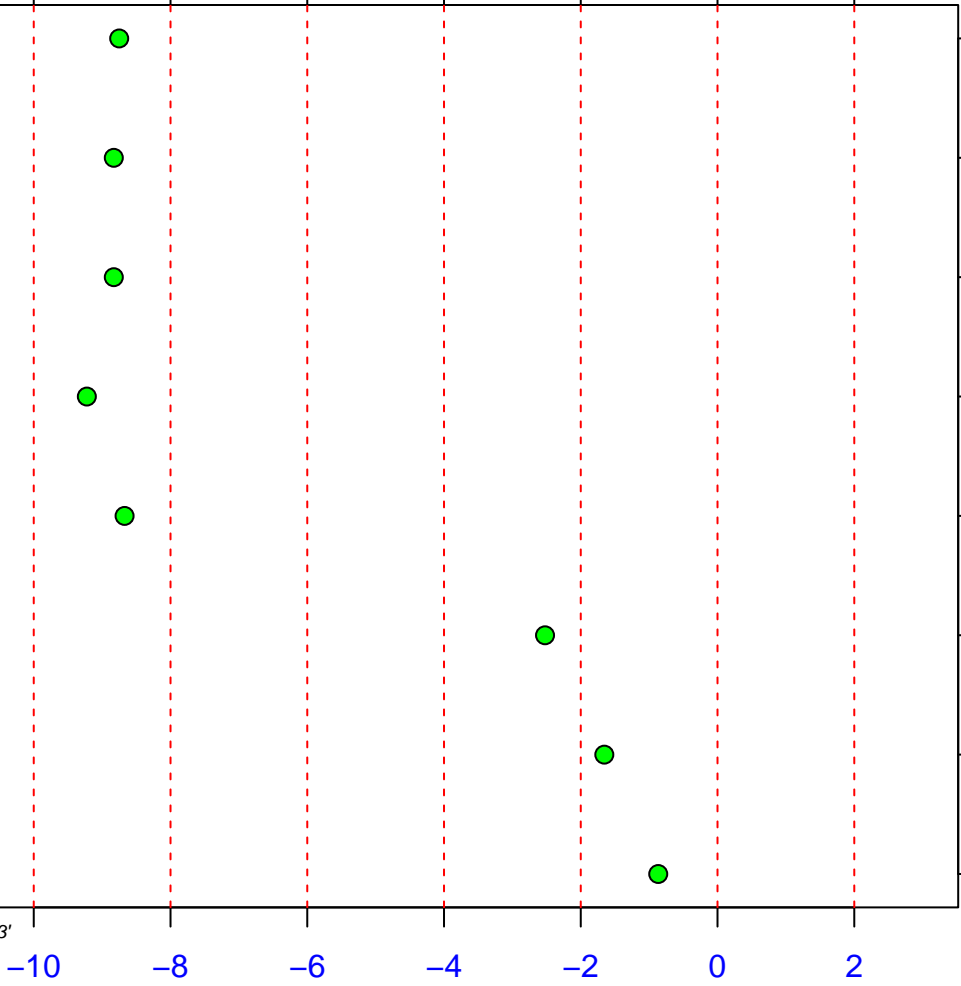

%diff 100\*(GBBS-TG43)/TG43

GBBS(solid model applicator, body, balloon & rectal contrast, packing contrast)

# Patient\_18 balloon center

'phantom least similar to TG43'

- D(Y, N, B, B)
- D(Y, N, B, N)
- D(Y, N, B, M)
- D(N, N, N, N)
- D(Y, N, N, N)
- D(Y, N, M, M)
- D(Y, M, X, X)
- D(N, M, X, X)

'phantom most similar to TG43'

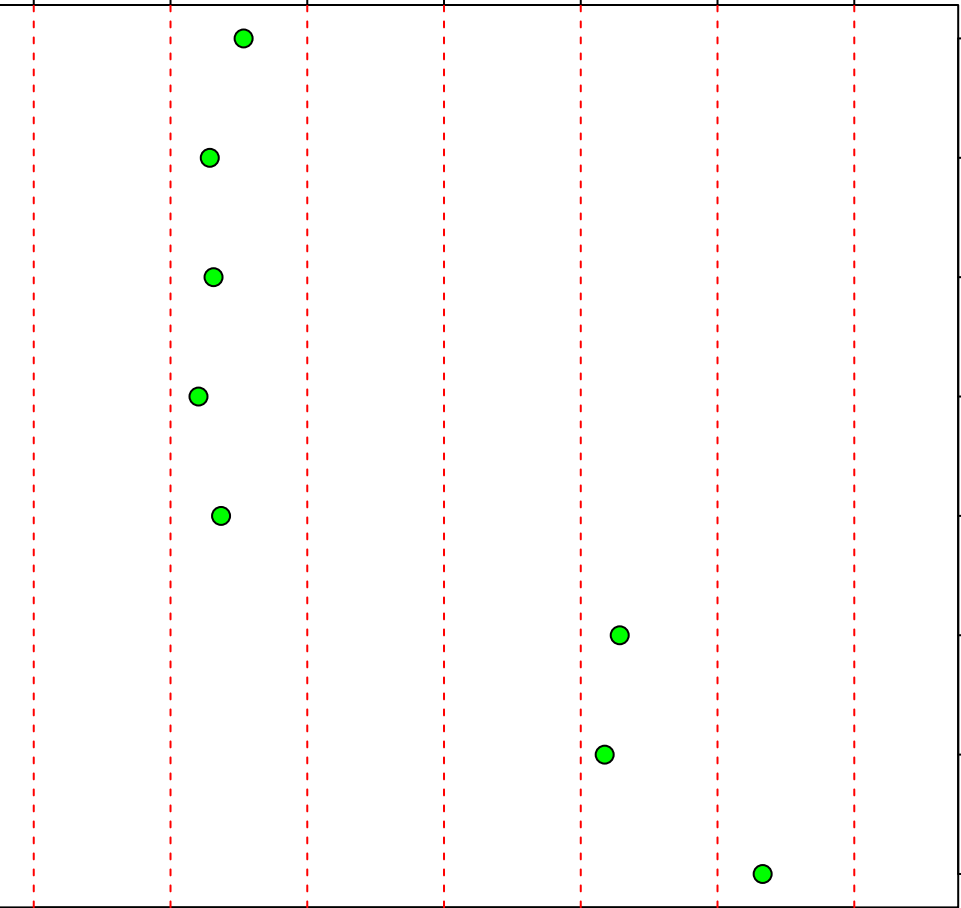

%diff 100\*(GBBS-TG43)/TG43

GBBS(solid model applicator, body, balloon & rectal contrast, packing contrast)

# Patient\_19 balloon center

'phantom least similar to TG43'

D(Y, N, B, B)

D(Y, N, B, N)

D(Y, N, B, M)

D(N, N, N, N)

D(Y, N, N, N)

D(Y, N, M, M)

D(Y, M, X, X)

D(N, M, X, X)

'phantom most similar to TG43'

-10 -8 -6 -4 -2 0 2

%diff 100\*(GBBS-TG43)/TG43

GBBS(solid model applicator, body, balloon & rectal contrast, packing contrast)

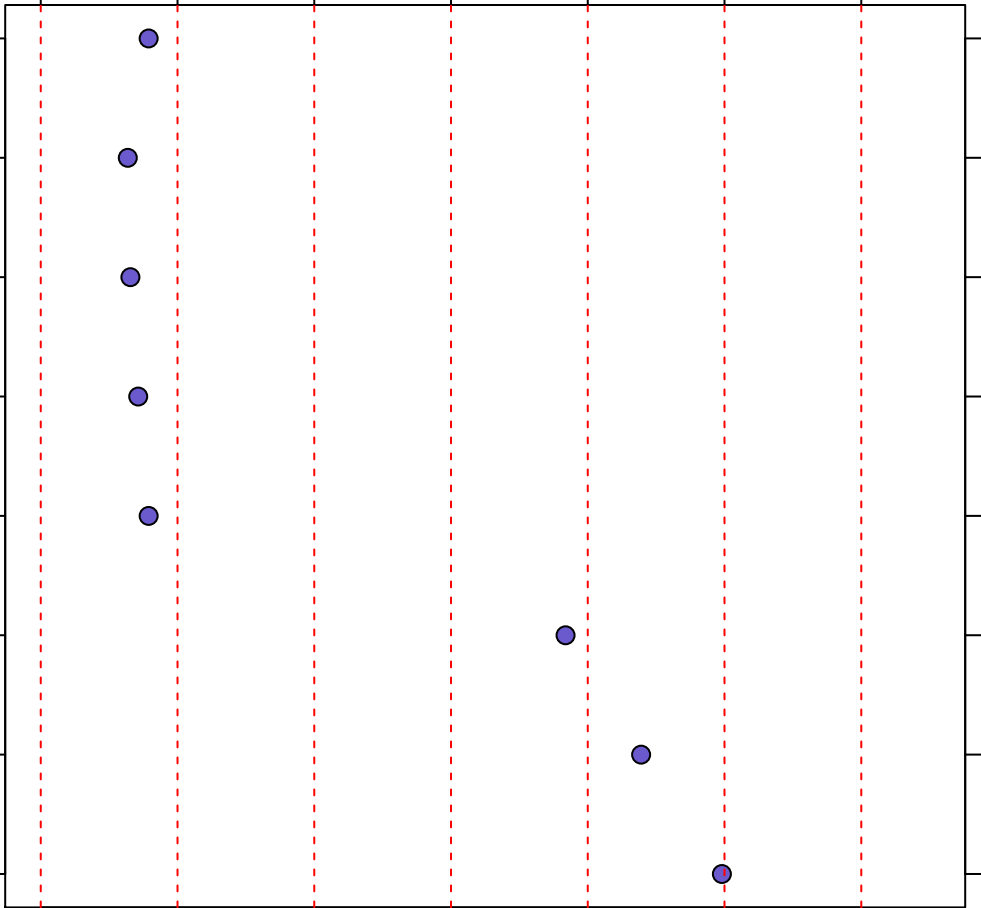

# Patient\_20 balloon center

'phantom least similar to TG43'

- D(Y, N, B, B)
- D(Y, N, B, N)
- D(Y, N, B, M)
- D(N, N, N, N)
- D(Y, N, N, N)
- D(Y, N, M, M)
- D(Y, M, X, X)
- D(N, M, X, X)

'phantom most similar to TG43'

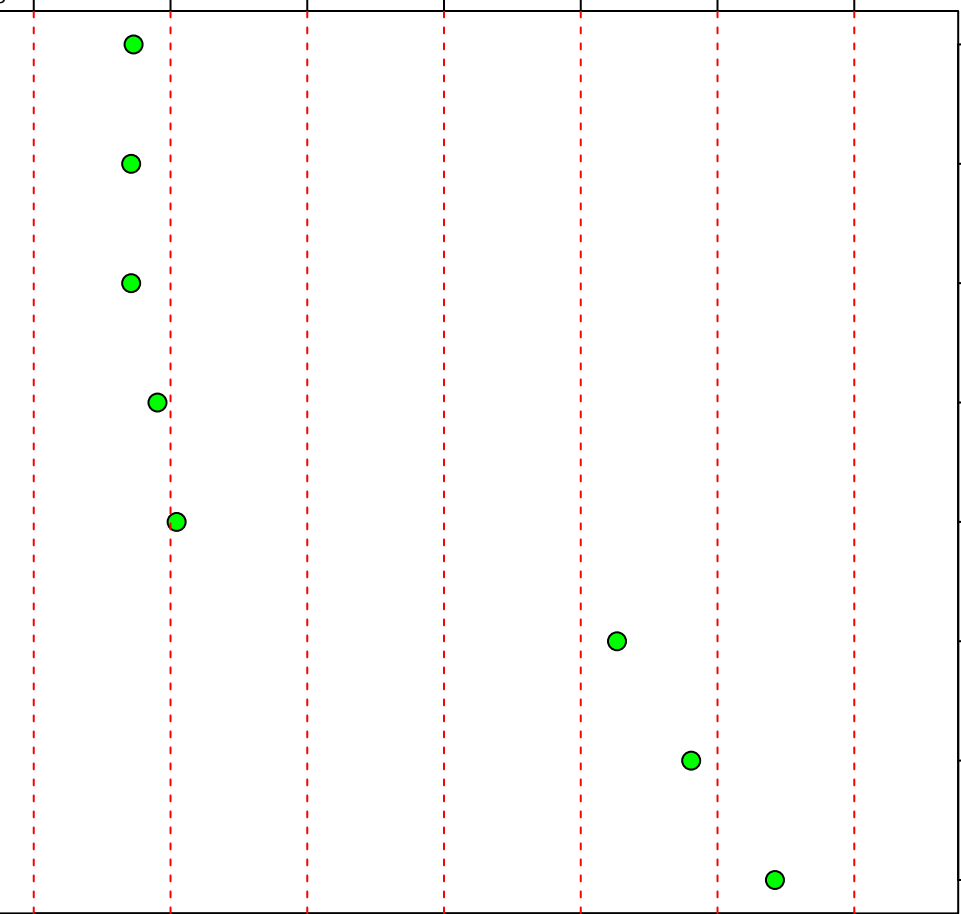

%diff 100\*(GBBS-TG43)/TG43

GBBS(solid model applicator, body, balloon & rectal contrast, packing contrast)

# Patient\_21 balloon center

'phantom least similar to TG43'

D(Y, N, B, B)

D(Y, N, B, N)

D(Y, N, B, M)

D(N, N, N, N)

D(Y, N, N, N)

D(Y, N, M, M)

D(Y, M, X, X)

D(N, M, X, X)

'phantom most similar to TG43'

-10 -8 -6 -4 -2 0 2

%diff 100\*(GBBS-TG43)/TG43

GBBS(solid model applicator, body, balloon & rectal contrast, packing contrast)

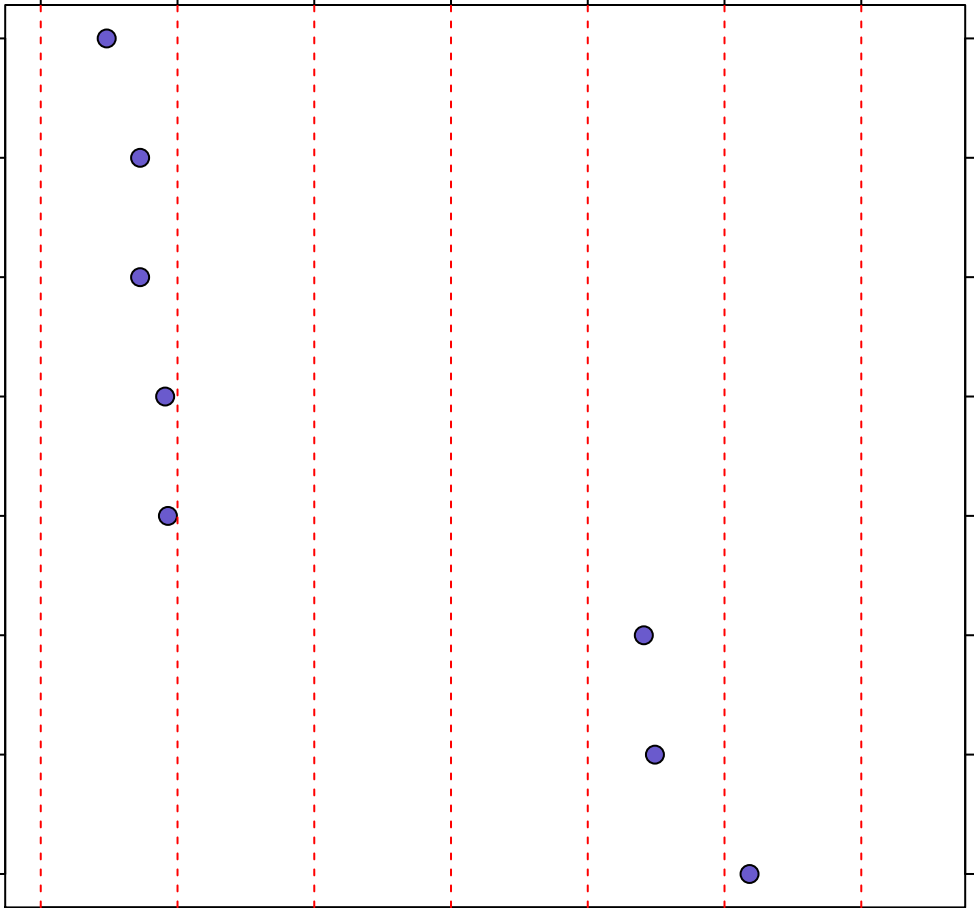



# Patient\_22 balloon center

'phantom least similar to TG43'

D(Y, N, B, B)

D(Y, N, B, N)

D(Y, N, B, M)

D(N, N, N, N)

D(Y, N, N, N)

D(Y, N, M, M)

D(Y, M, X, X)

D(N, M, X, X)

'phantom most similar to TG43'

-10 -8 -6 -4 -2 0 2

%diff 100\*(GBBS-TG43)/TG43

GBBS(solid model applicator, body, balloon & rectal contrast, packing contrast)

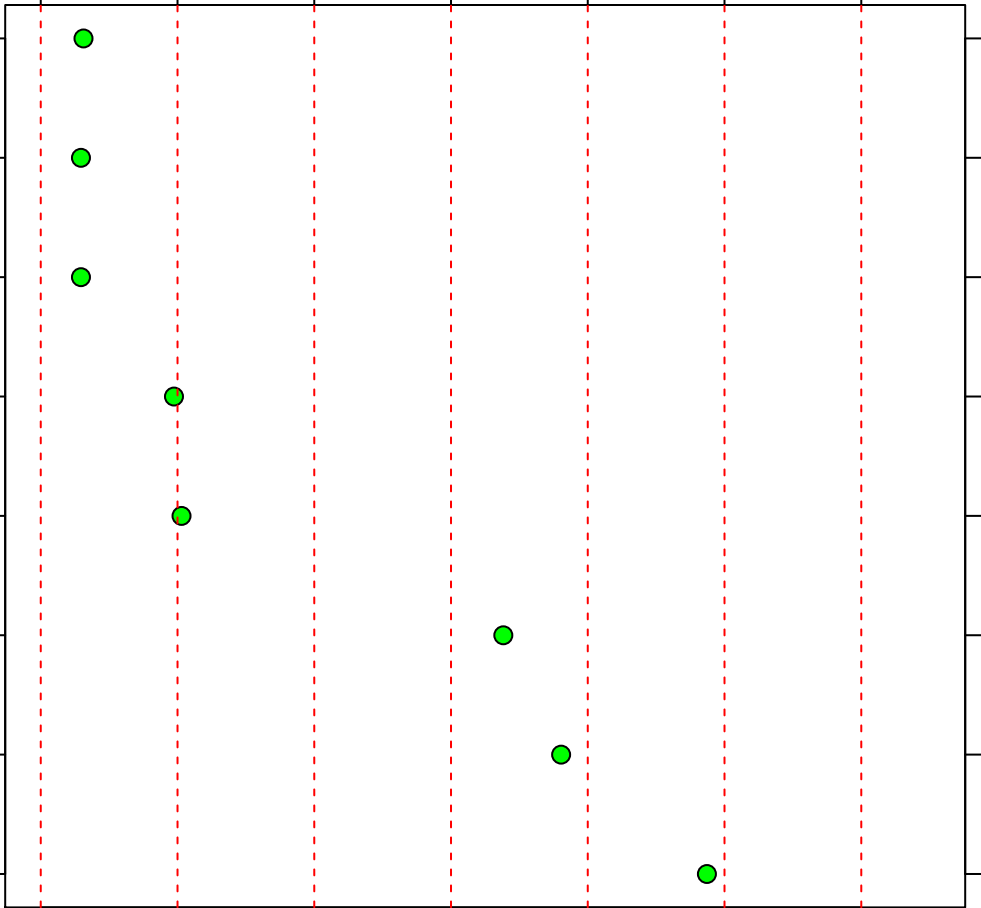

# Patient\_23 balloon center

'phantom least similar to TG43'

- D(Y, N, B, B)
- D(Y, N, B, N)
- D(Y, N, B, M)
- D(N, N, N, N)
- D(Y, N, N, N)
- D(Y, N, M, M)
- D(Y, M, X, X)
- D(N, M, X, X)

'phantom most similar to TG43'

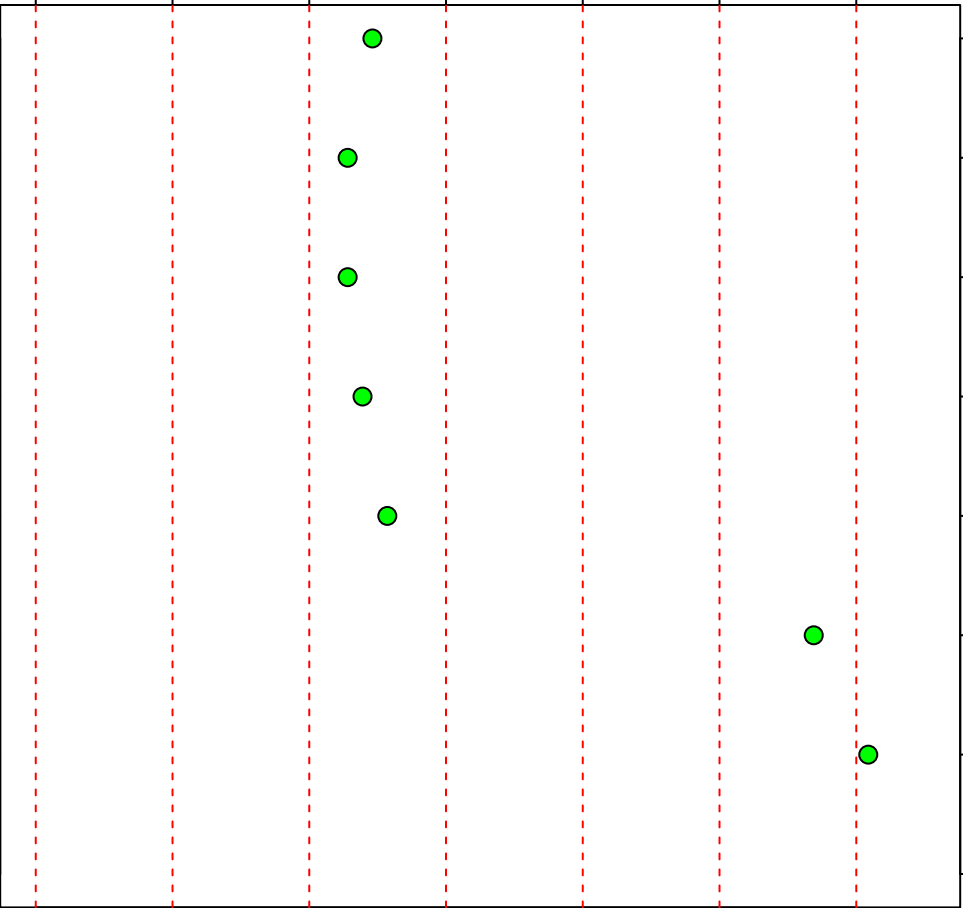

%diff 100\*(GBBS-TG43)/TG43

GBBS(solid model applicator, body, balloon & rectal contrast, packing contrast)

# Patient\_24 balloon center

'phantom least similar to TG43'

D(Y, N, B, B)

D(Y, N, B, N)

D(Y, N, B, M)

D(N, N, N, N)

D(Y, N, N, N)

D(Y, N, M, M)

D(Y, M, X, X)

D(N, M, X, X)

'phantom most similar to TG43'

-10 -8 -6 -4 -2 0 2

%diff 100\*(GBBS-TG43)/TG43

GBBS(solid model applicator, body, balloon & rectal contrast, packing contrast)

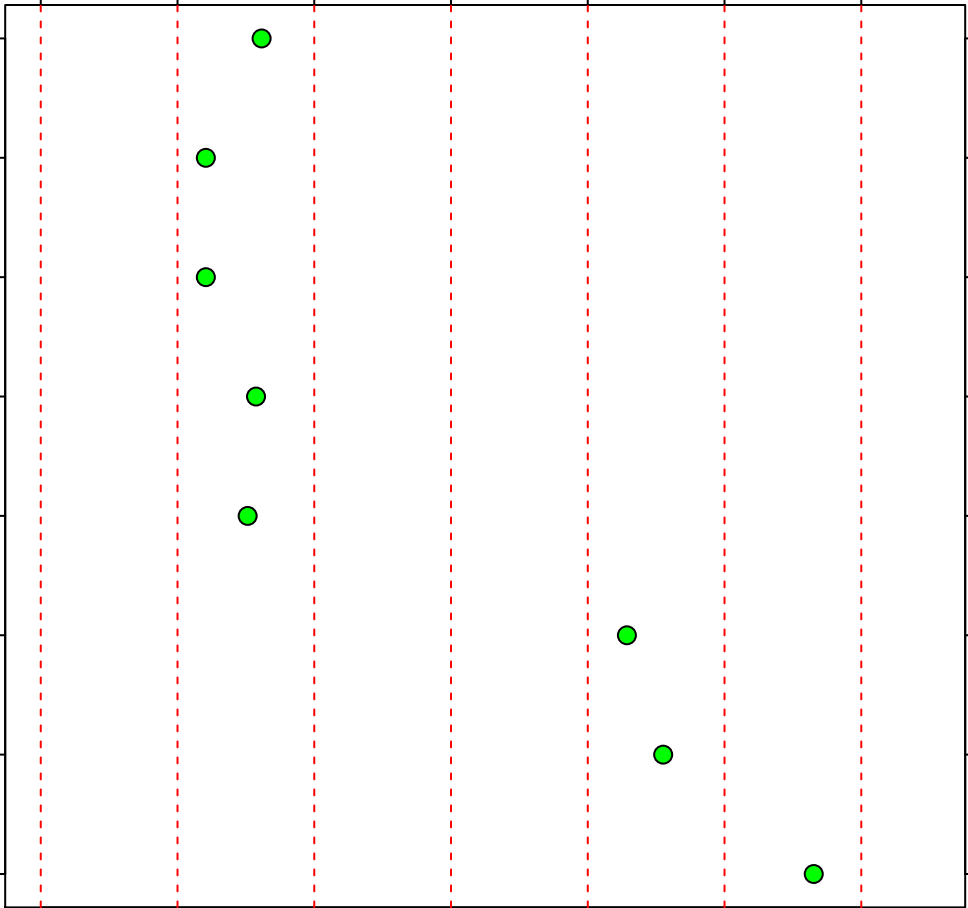

# Patient\_25 balloon center

'phantom least similar to TG43'

D(Y, N, B, B)

D(Y, N, B, N)

D(Y, N, B, M)

D(N, N, N, N)

D(Y, N, N, N)

D(Y, N, M, M)

D(Y, M, X, X)

D(N, M, X, X)

'phantom most similar to TG43'

-10 -8 -6 -4 -2 0 2

%diff 100\*(GBBS-TG43)/TG43

GBBS(solid model applicator, body, balloon & rectal contrast, packing contrast)

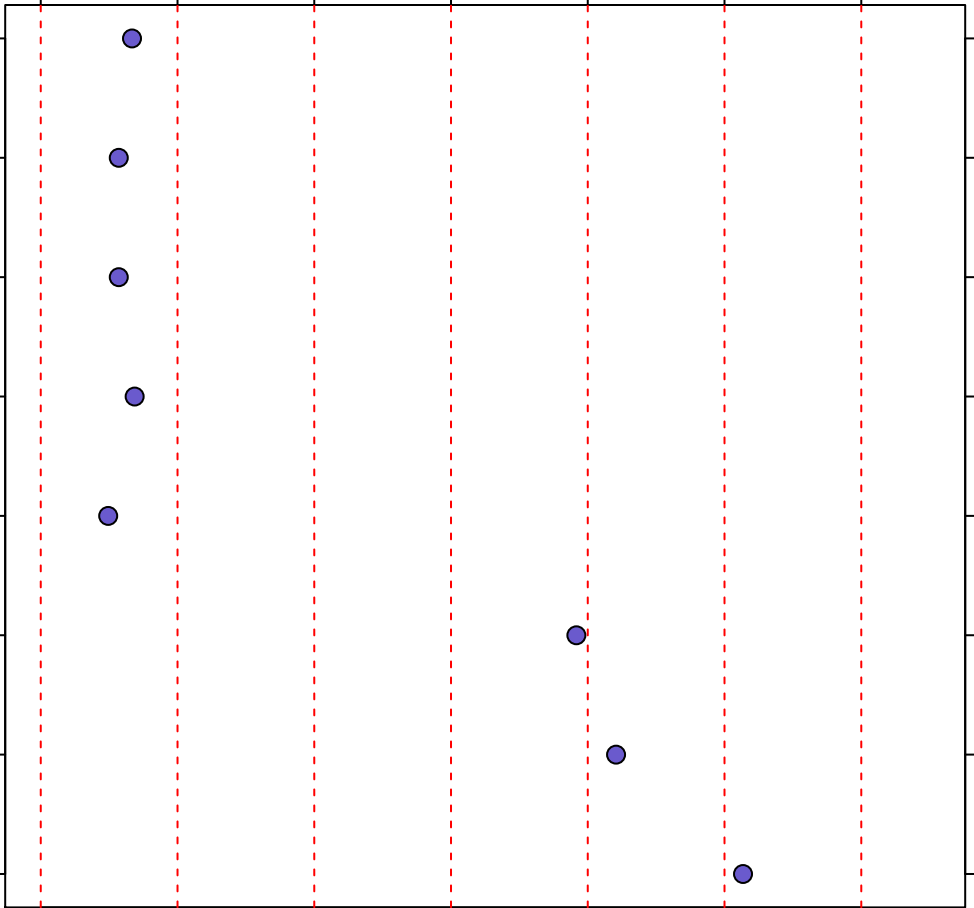

# Patient\_26 balloon center

'phantom least similar to TG43'

D(Y, N, B, B)

D(Y, N, B, N)

D(Y, N, B, M)

D(N, N, N, N)

D(Y, N, N, N)

D(Y, N, M, M)

D(Y, M, X, X)

D(N, M, X, X)

'phantom most similar to TG43'



%diff 100\*(GBBS-TG43)/TG43

GBBS(solid model applicator, body, balloon & rectal contrast, packing contrast)

# Patient\_01 3 oclock

'phantom least similar to TG43'

D(Y, N, B, B)

D(Y, N, B, N)

D(Y, N, B, M)

D(N, N, N, N)

D(Y, N, N, N)

D(Y, N, M, M)

D(Y, M, X, X)

D(N, M, X, X)

'phantom most similar to TG43'

-10

-8

-6

-4

-2

0

2

%diff 100\*(GBBS-TG43)/TG43

GBBS(solid model applicator, body, balloon & rectal contrast, packing contrast)

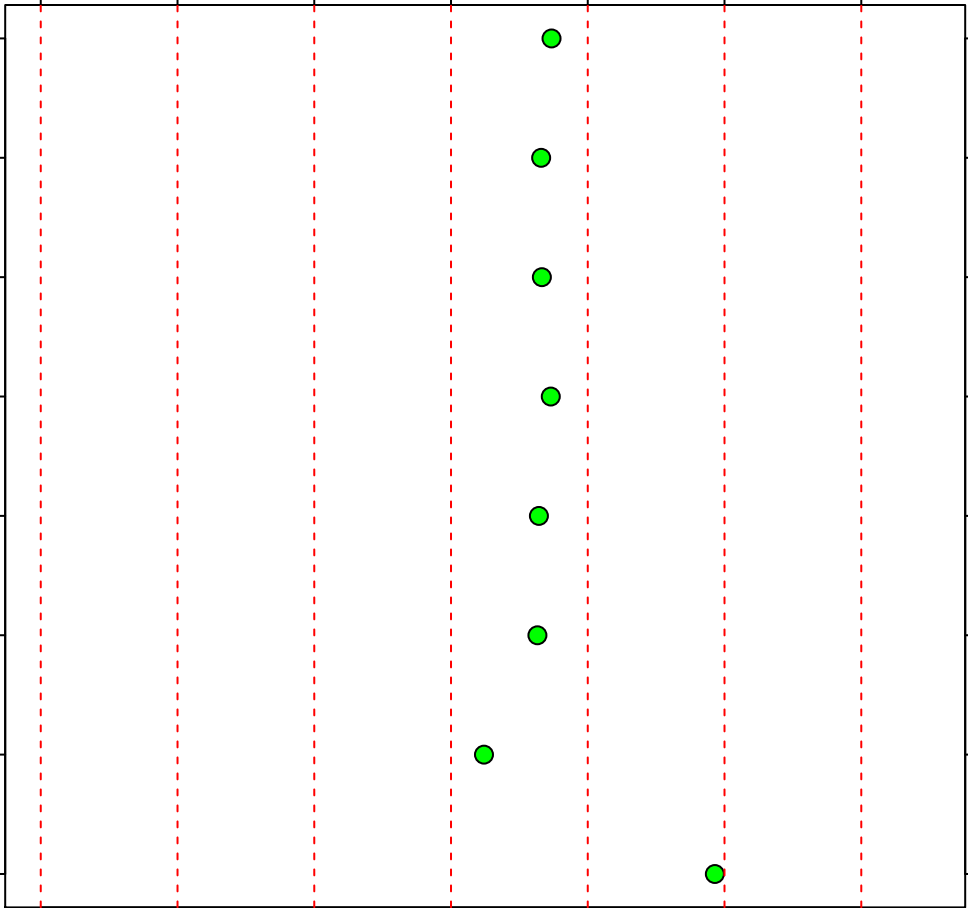

# Patient\_02 3 oclock

'phantom least similar to TG43'

D(Y, N, B, B)

D(Y, N, B, N)

D(Y, N, B, M)

D(N, N, N, N)

D(Y, N, N, N)

D(Y, N, M, M)

D(Y, M, X, X)

D(N, M, X, X)

'phantom most similar to TG43'

-10

-8

-6

-4

-2

0

2

%diff 100\*(GBBS-TG43)/TG43

GBBS(solid model applicator, body, balloon & rectal contrast, packing contrast)

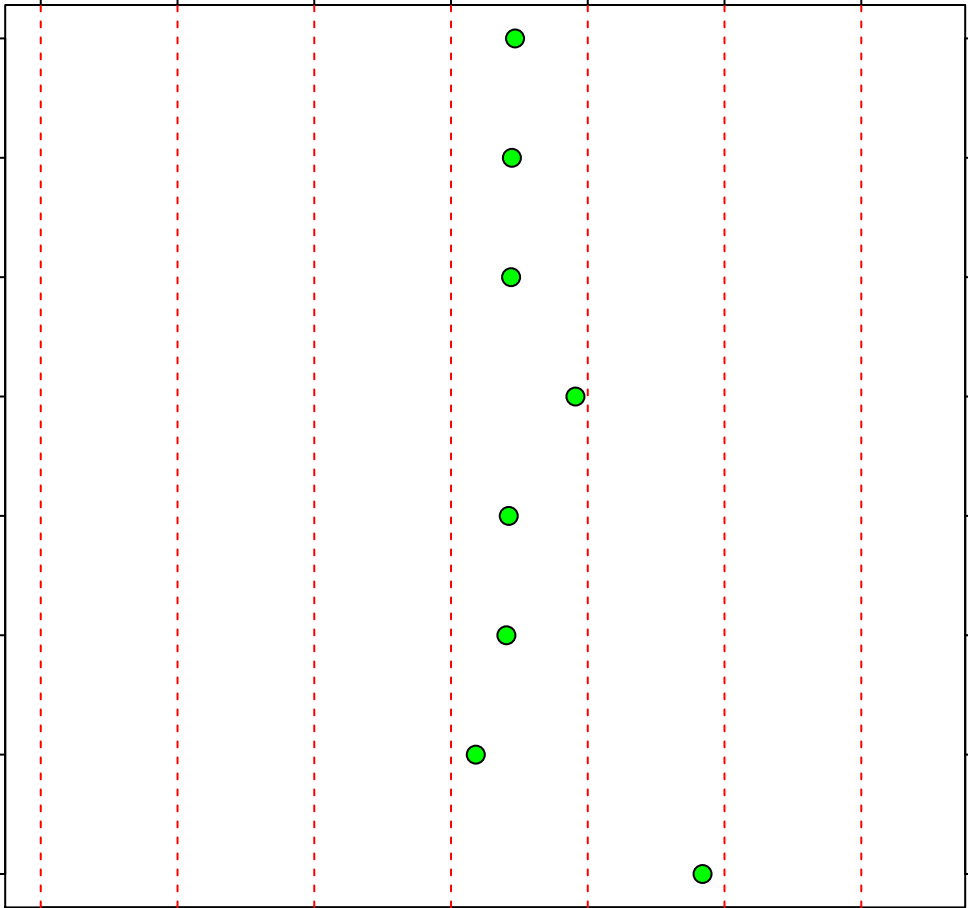

# Patient\_03 3 oclock

'phantom least similar to TG43'

D(Y, N, B, B)

D(Y, N, B, N)

D(Y, N, B, M)

D(N, N, N, N)

D(Y, N, N, N)

D(Y, N, M, M)

D(Y, M, X, X)

D(N, M, X, X)

'phantom most similar to TG43'

-10

-8

-6

-4

-2

0

2

%diff 100\*(GBBS-TG43)/TG43

GBBS(solid model applicator, body, balloon & rectal contrast, packing contrast)

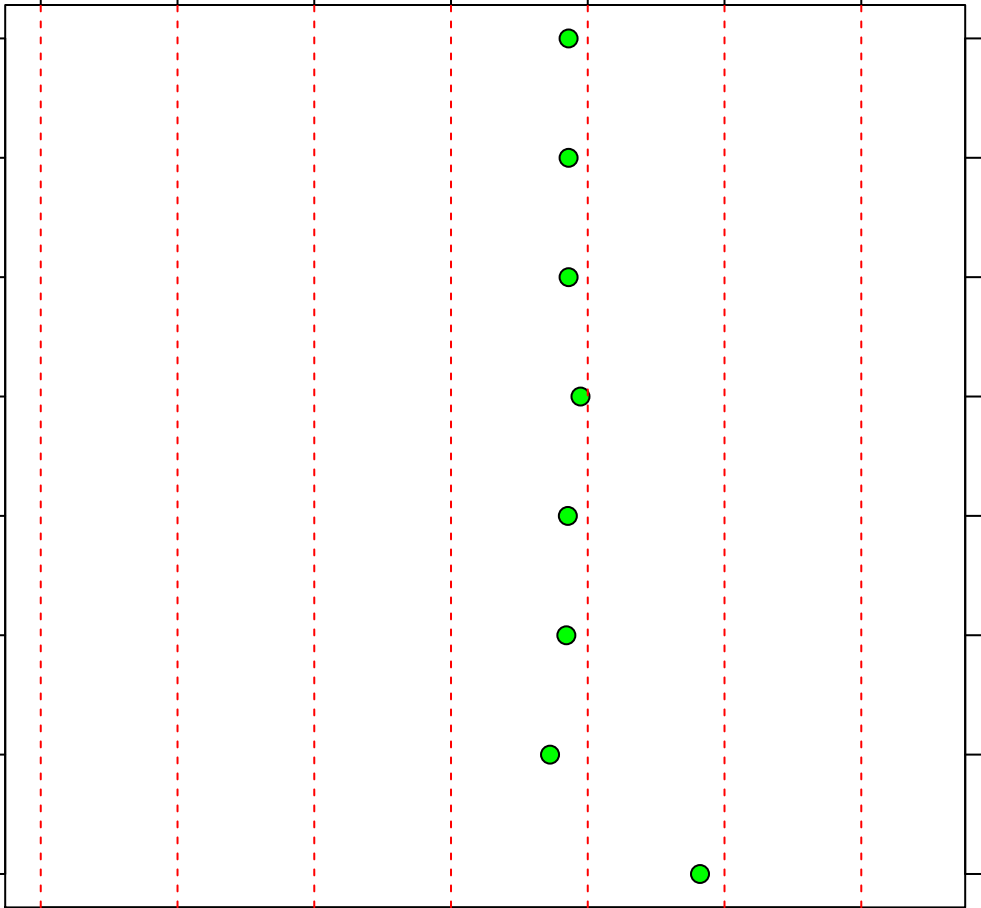



# Patient\_04 3 oclock

'phantom least similar to TG43'

- D(Y, N, B, B)
- D(Y, N, B, N)
- D(Y, N, B, M)
- D(N, N, N, N)
- D(Y, N, N, N)
- D(Y, N, M, M)
- D(Y, M, X, X)
- D(N, M, X, X)

'phantom most similar to TG43'

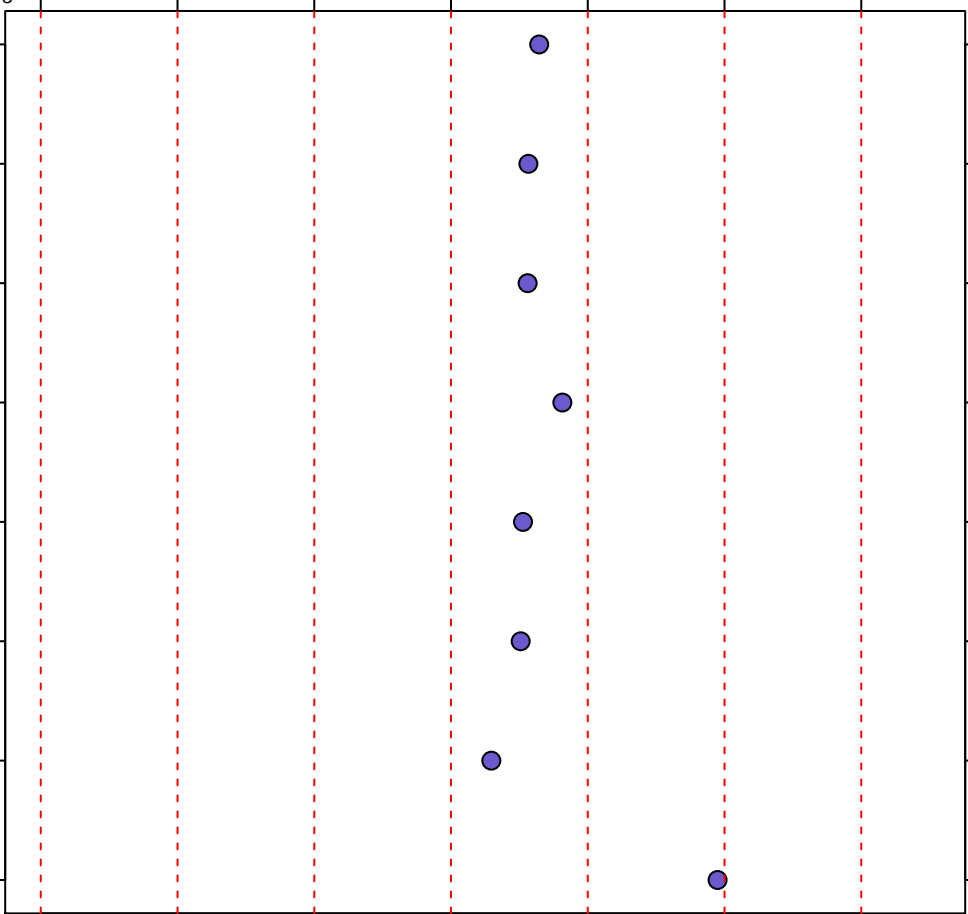

%diff 100\*(GBBS-TG43)/TG43

GBBS(solid model applicator, body, balloon & rectal contrast, packing contrast)

# Patient\_05 3 oclock

'phantom least similar to TG43'

D(Y, N, B, B)

D(Y, N, B, N)

D(Y, N, B, M)

D(N, N, N, N)

D(Y, N, N, N)

D(Y, N, M, M)

D(Y, M, X, X)

D(N, M, X, X)

'phantom most similar to TG43'

-10 -8 -6 -4 -2 0 2

%diff 100\*(GBBS-TG43)/TG43

GBBS(solid model applicator, body, balloon & rectal contrast, packing contrast)

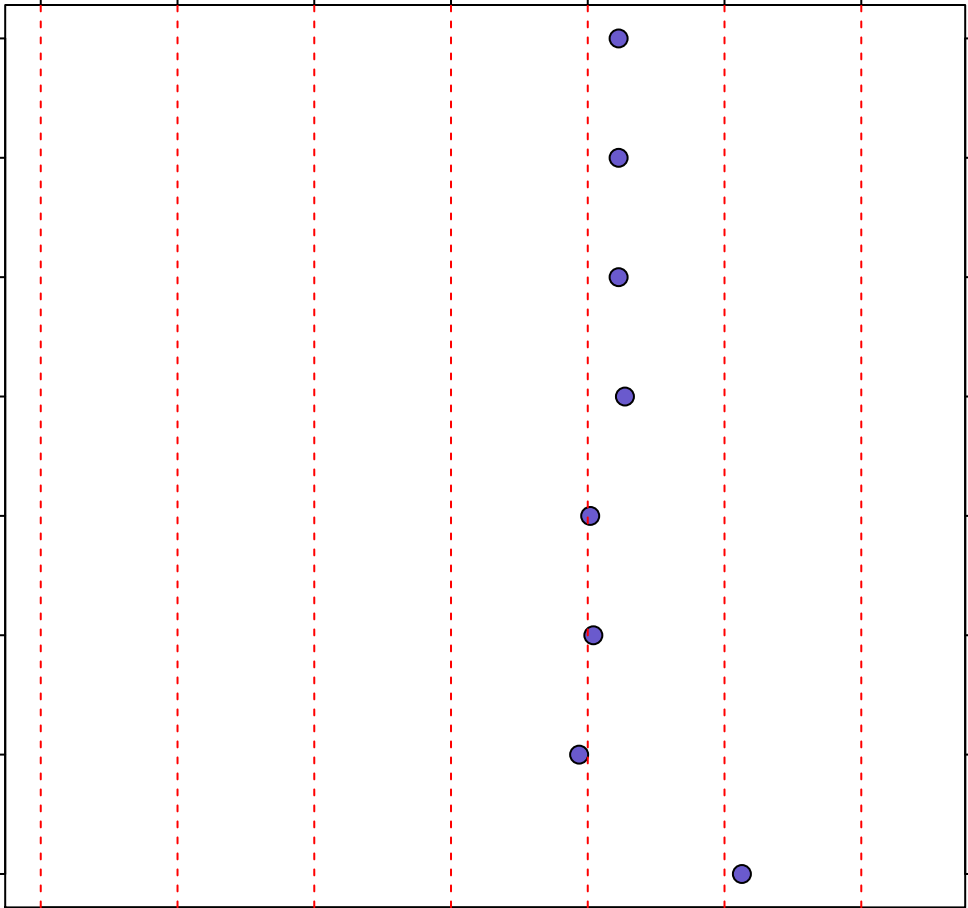

# Patient\_06 3 oclock

'phantom least similar to TG43'

D(Y, N, B, B)

D(Y, N, B, N)

D(Y, N, B, M)

D(N, N, N, N)

D(Y, N, N, N)

D(Y, N, M, M)

D(Y, M, X, X)

D(N, M, X, X)

'phantom most similar to TG43'

-10 -8 -6 -4 -2 0 2

%diff 100\*(GBBS-TG43)/TG43

GBBS(solid model applicator, body, balloon & rectal contrast, packing contrast)

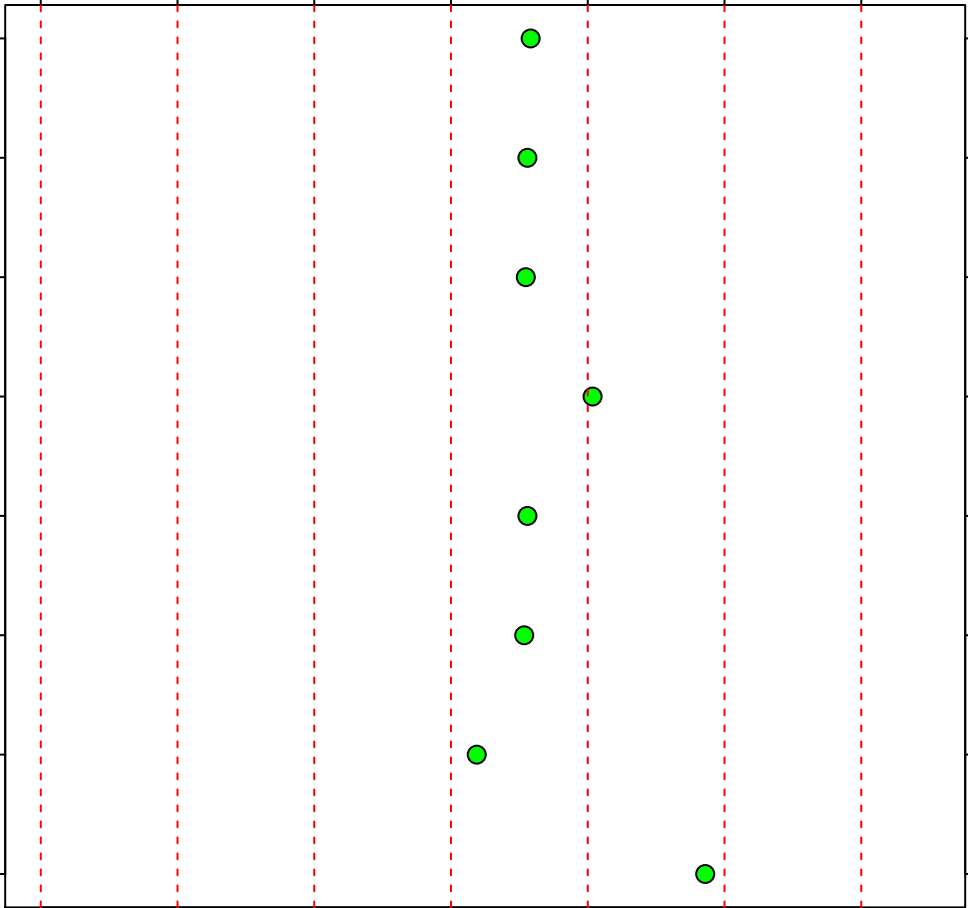

# Patient\_07 3 oclock

'phantom least similar to TG43'

D(Y, N, B, B)

D(Y, N, B, N)

D(Y, N, B, M)

D(N, N, N, N)

D(Y, N, N, N)

D(Y, N, M, M)

D(Y, M, X, X)

D(N, M, X, X)

'phantom most similar to TG43'

-10 -8 -6 -4 -2 0 2

%diff 100\*(GBBS-TG43)/TG43

GBBS(solid model applicator, body, balloon & rectal contrast, packing contrast)

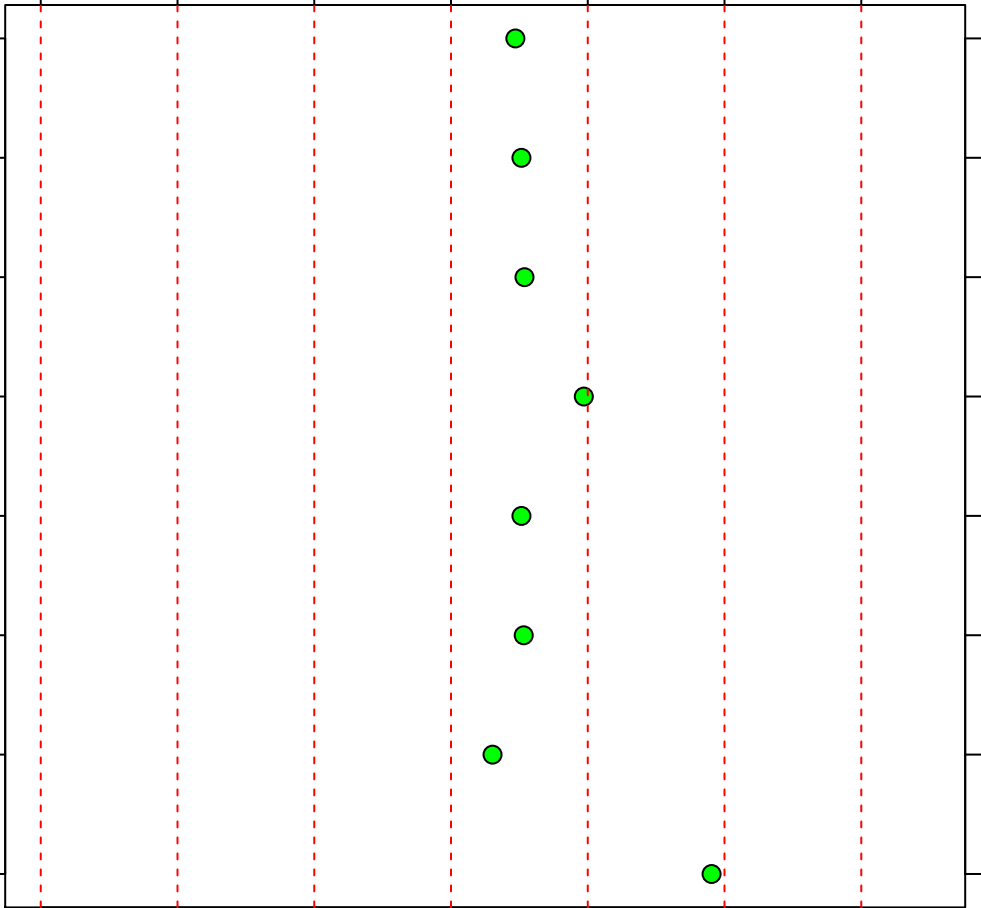

# Patient\_08 3 oclock

'phantom least similar to TG43'

D(Y, N, B, B)

D(Y, N, B, N)

D(Y, N, B, M)

D(N, N, N, N)

D(Y, N, N, N)

D(Y, N, M, M)

D(Y, M, X, X)

D(N, M, X, X)

'phantom most similar to TG43'

-10

-8

-6

-4

-2

0

2

%diff 100\*(GBBS-TG43)/TG43

GBBS(solid model applicator, body, balloon & rectal contrast, packing contrast)

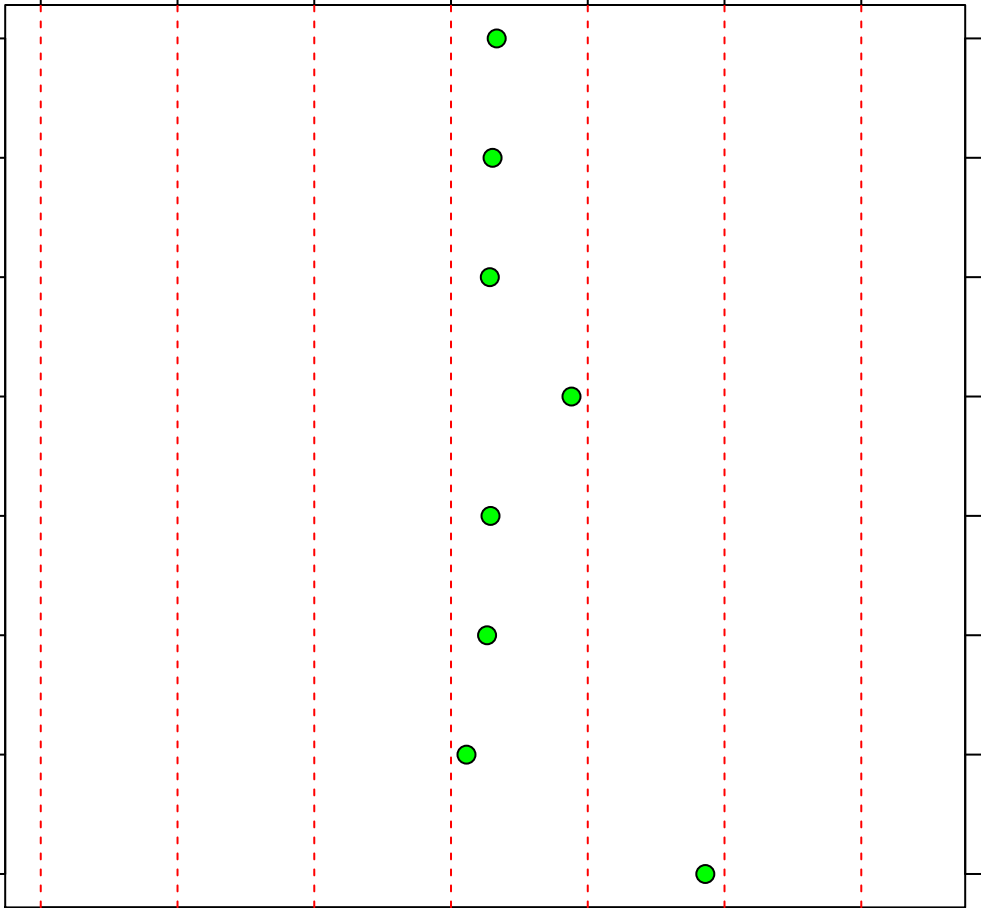

# Patient\_09 3 oclock

'phantom least similar to TG43'

D(Y, N, B, B)

D(Y, N, B, N)

D(Y, N, B, M)

D(N, N, N, N)

D(Y, N, N, N)

D(Y, N, M, M)

D(Y, M, X, X)

D(N, M, X, X)

'phantom most similar to TG43'

-10 -8 -6 -4 -2 0 2

%diff 100\*(GBBS-TG43)/TG43

GBBS(solid model applicator, body, balloon & rectal contrast, packing contrast)

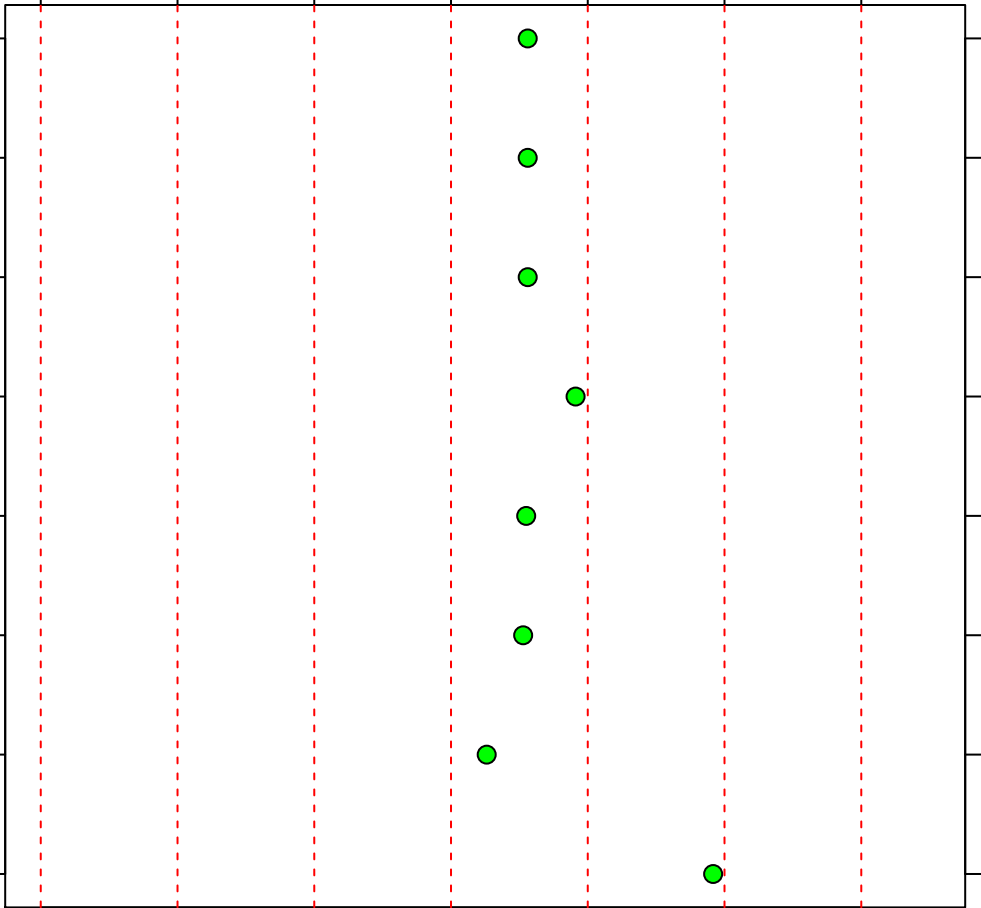

# Patient\_10 3 oclock

'phantom least similar to TG43'

D(Y, N, B, B)

D(Y, N, B, N)

D(Y, N, B, M)

D(N, N, N, N)

D(Y, N, N, N)

D(Y, N, M, M)

D(Y, M, X, X)

D(N, M, X, X)

'phantom most similar to TG43'

-10 -8 -6 -4 -2 0 2

%diff 100\*(GBBS-TG43)/TG43

GBBS(solid model applicator, body, balloon & rectal contrast, packing contrast)

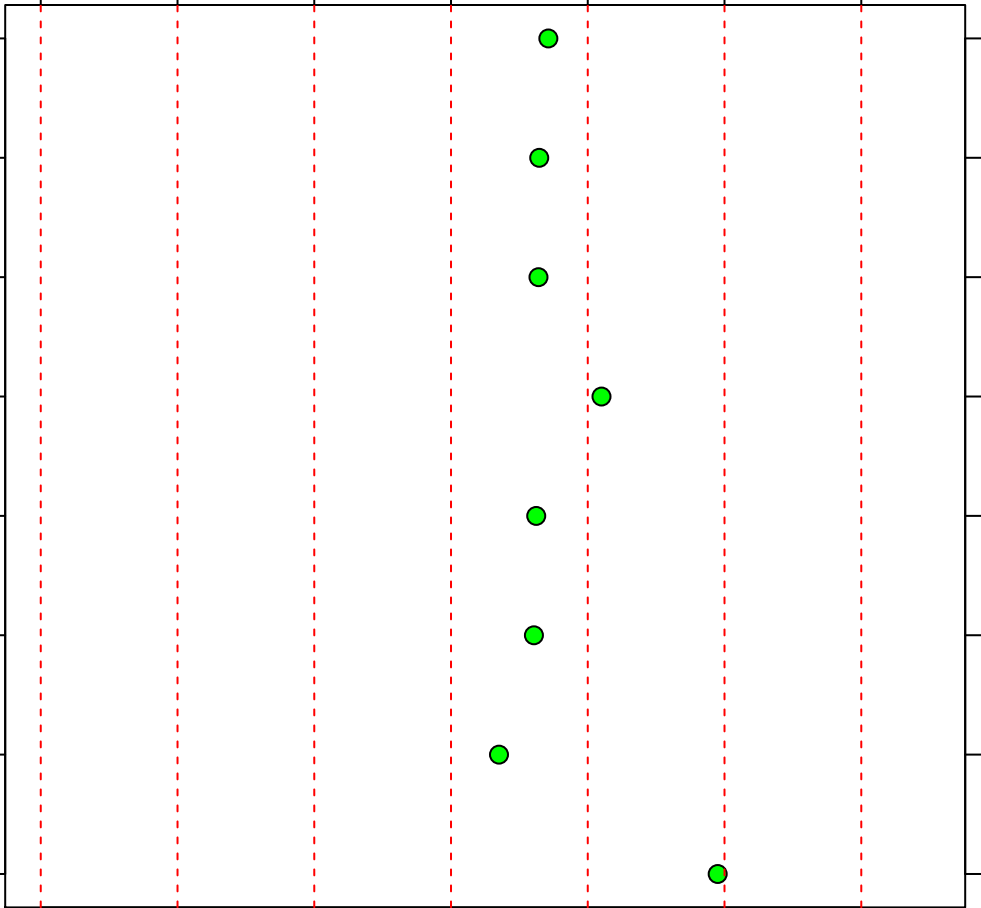

# Patient\_11 3 oclock

'phantom least similar to TG43'

D(Y, N, B, B)

D(Y, N, B, N)

D(Y, N, B, M)

D(N, N, N, N)

D(Y, N, N, N)

D(Y, N, M, M)

D(Y, M, X, X)

D(N, M, X, X)

'phantom most similar to TG43'

-10

-8

-6

-4

-2

0

2

%diff 100\*(GBBS-TG43)/TG43

GBBS(solid model applicator, body, balloon & rectal contrast, packing contrast)

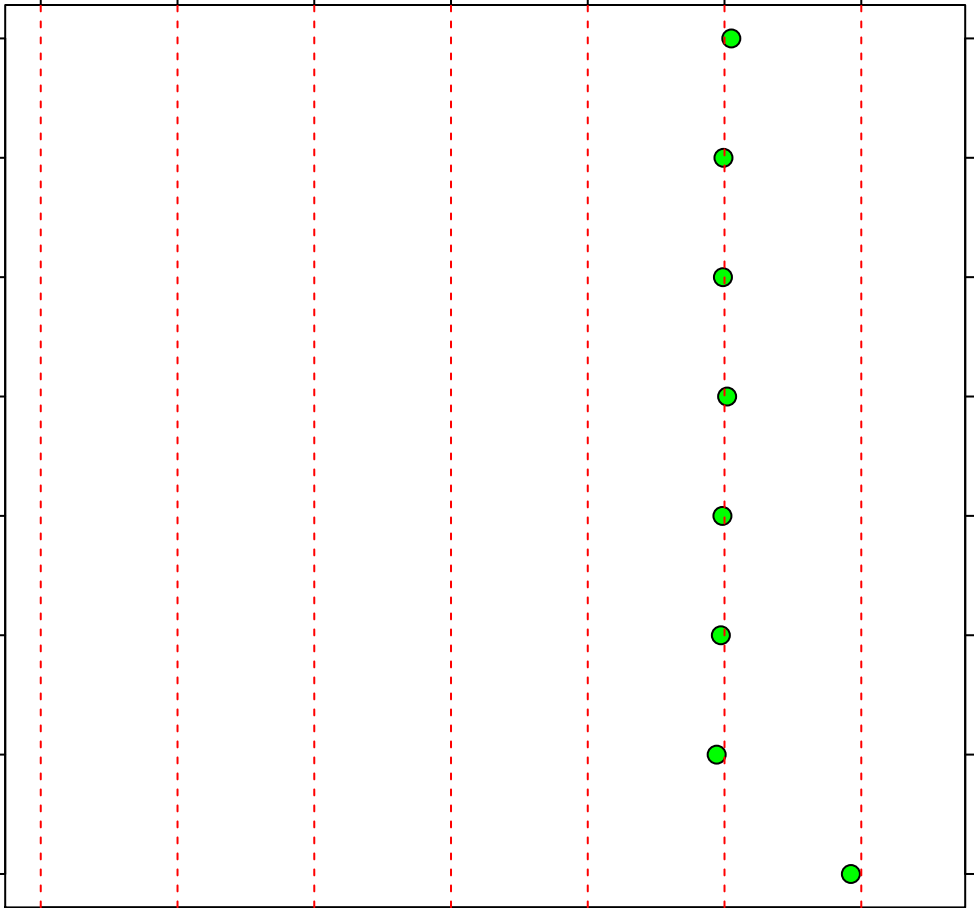



# Patient\_12 3 oclock

'phantom least similar to TG43'

D(Y, N, B, B)

D(Y, N, B, N)

D(Y, N, B, M)

D(N, N, N, N)

D(Y, N, N, N)

D(Y, N, M, M)

D(Y, M, X, X)

D(N, M, X, X)

'phantom most similar to TG43'

-10 -8 -6 -4 -2 0 2

%diff 100\*(GBBS-TG43)/TG43

GBBS(solid model applicator, body, balloon & rectal contrast, packing contrast)

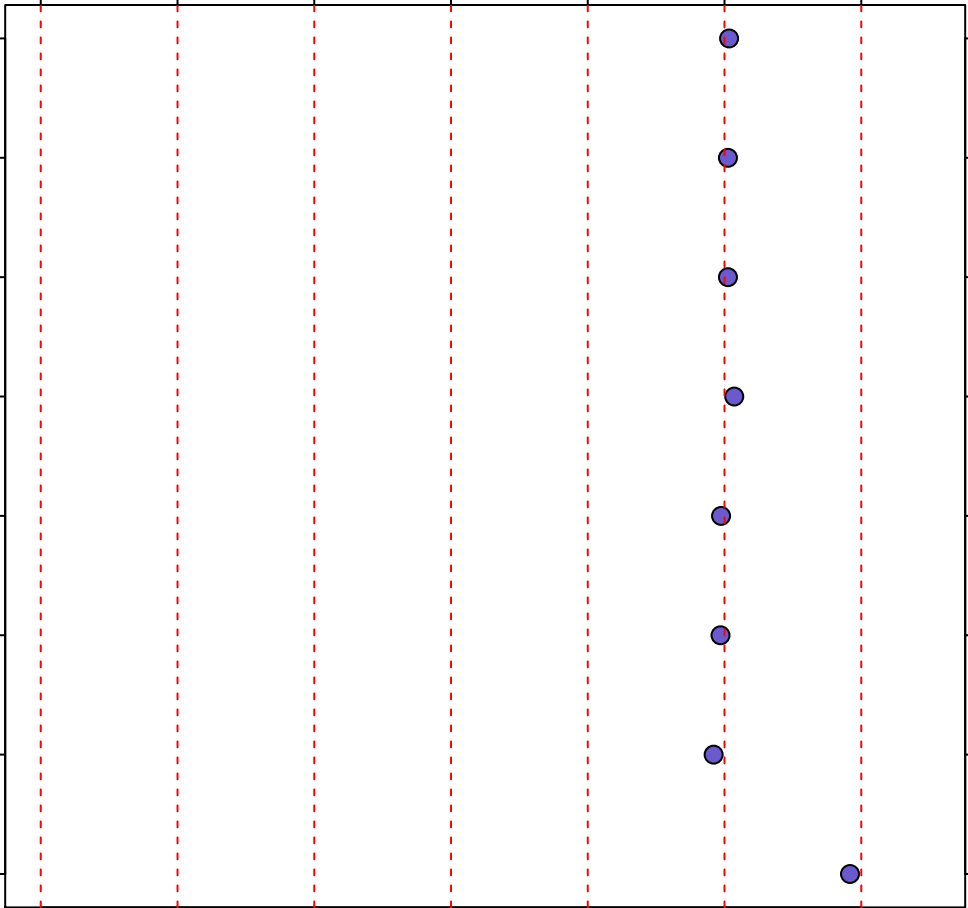

# Patient\_13 3 oclock

'phantom least similar to TG43'

D(Y, N, B, B)

D(Y, N, B, N)

D(Y, N, B, M)

D(N, N, N, N)

D(Y, N, N, N)

D(Y, N, M, M)

D(Y, M, X, X)

D(N, M, X, X)

'phantom most similar to TG43'

-10

-8

-6

-4

-2

0

2

%diff 100\*(GBBS-TG43)/TG43

GBBS(solid model applicator, body, balloon & rectal contrast, packing contrast)

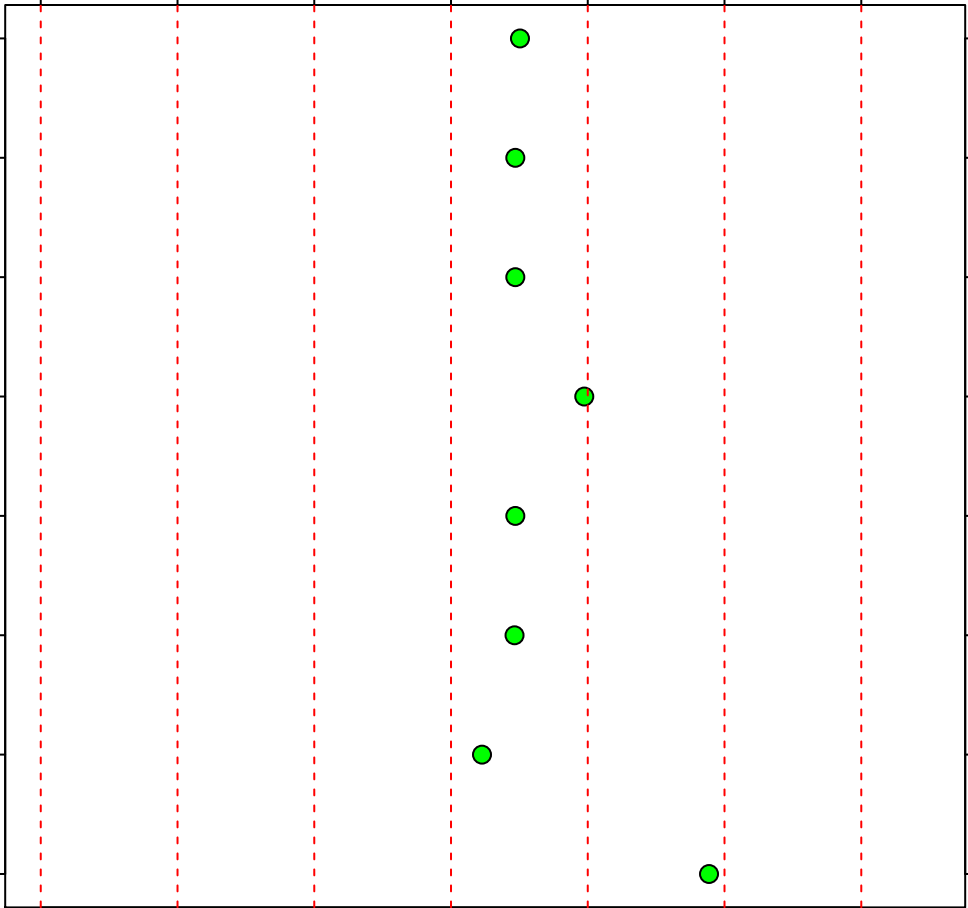

# Patient\_14 3 oclock

'phantom least similar to TG43'

D(Y, N, B, B)

D(Y, N, B, N)

D(Y, N, B, M)

D(N, N, N, N)

D(Y, N, N, N)

D(Y, N, M, M)

D(Y, M, X, X)

D(N, M, X, X)

'phantom most similar to TG43'

-10 -8 -6 -4 -2 0 2

%diff 100\*(GBBS-TG43)/TG43

GBBS(solid model applicator, body, balloon & rectal contrast, packing contrast)

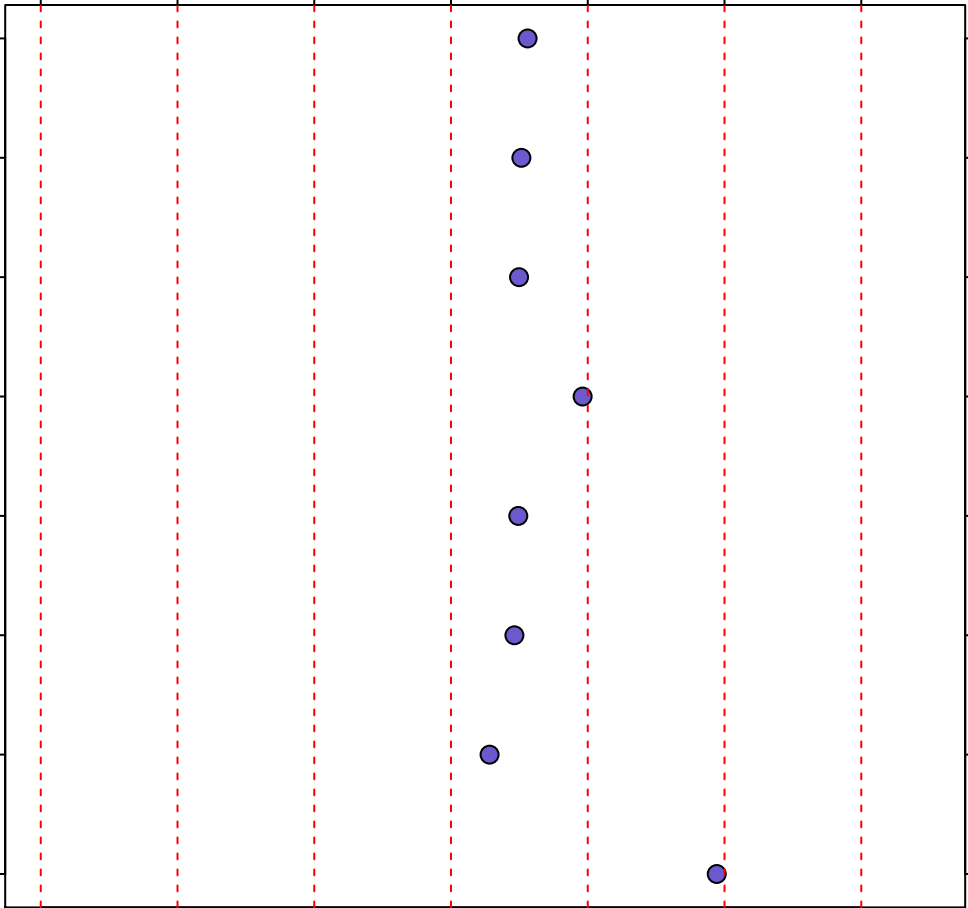

# Patient\_15 3 oclock

'phantom least similar to TG43'

D(Y, N, B, B)

D(Y, N, B, N)

D(Y, N, B, M)

D(N, N, N, N)

D(Y, N, N, N)

D(Y, N, M, M)

D(Y, M, X, X)

D(N, M, X, X)

'phantom most similar to TG43'

-10 -8 -6 -4 -2 0 2

%diff 100\*(GBBS-TG43)/TG43

GBBS(solid model applicator, body, balloon & rectal contrast, packing contrast)

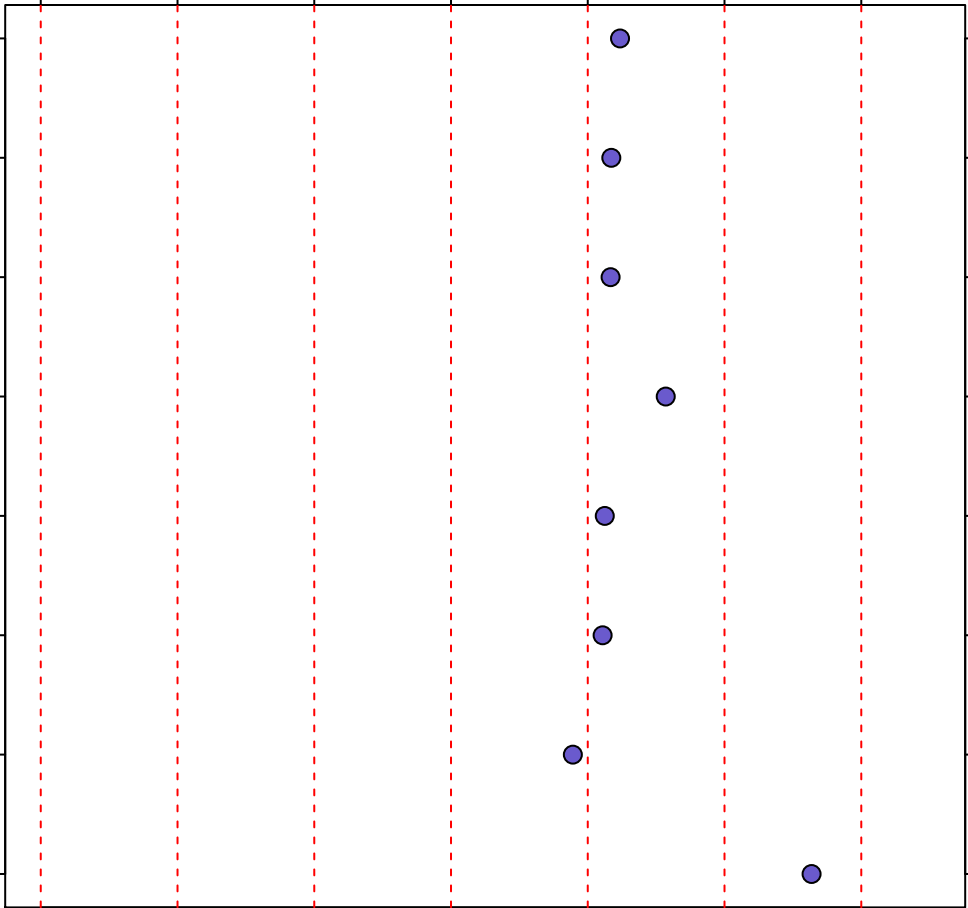

# Patient\_16 3 oclock

'phantom least similar to TG43'

D(Y, N, B, B)

D(Y, N, B, N)

D(Y, N, B, M)

D(N, N, N, N)

D(Y, N, N, N)

D(Y, N, M, M)

D(Y, M, X, X)

D(N, M, X, X)

'phantom most similar to TG43'

-10

-8

-6

-4

-2

0

2

%diff 100\*(GBBS-TG43)/TG43

GBBS(solid model applicator, body, balloon & rectal contrast, packing contrast)

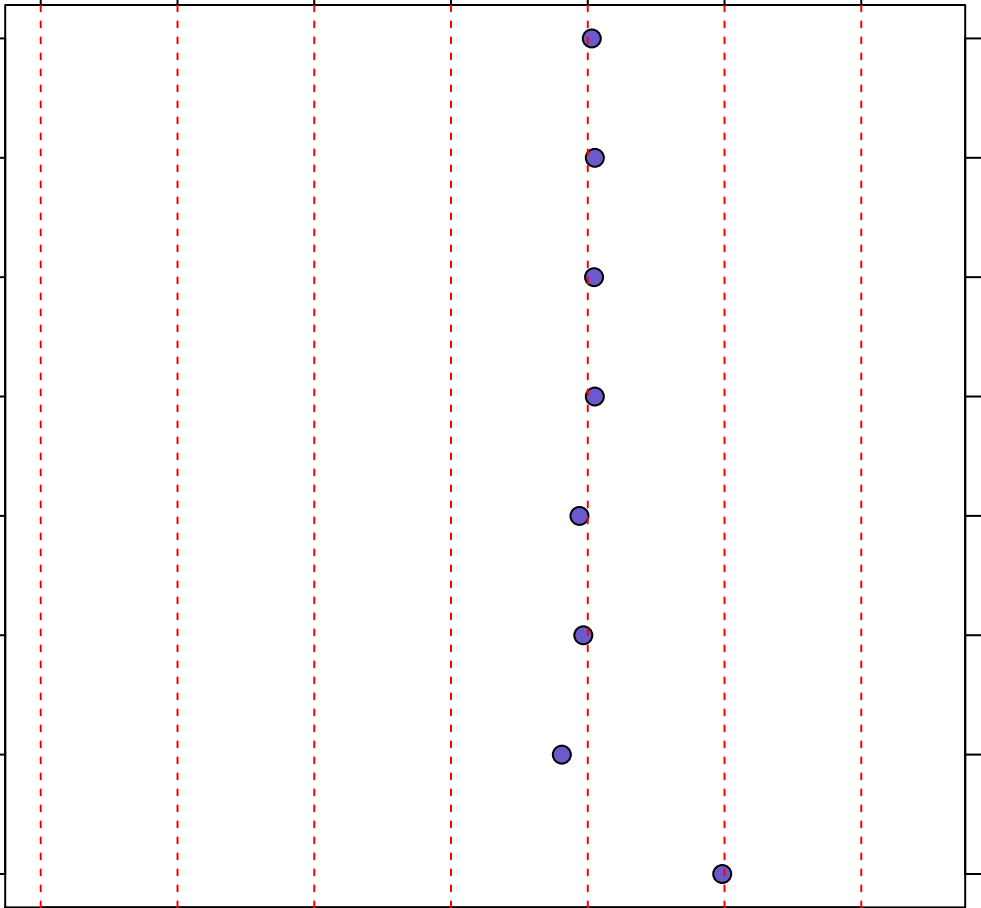

# Patient\_17 3 oclock

'phantom least similar to TG43'

D(Y, N, B, B)

D(Y, N, B, N)

D(Y, N, B, M)

D(N, N, N, N)

D(Y, N, N, N)

D(Y, N, M, M)

D(Y, M, X, X)

D(N, M, X, X)

'phantom most similar to TG43'

-10 -8 -6 -4 -2 0 2

%diff 100\*(GBBS-TG43)/TG43

GBBS(solid model applicator, body, balloon & rectal contrast, packing contrast)

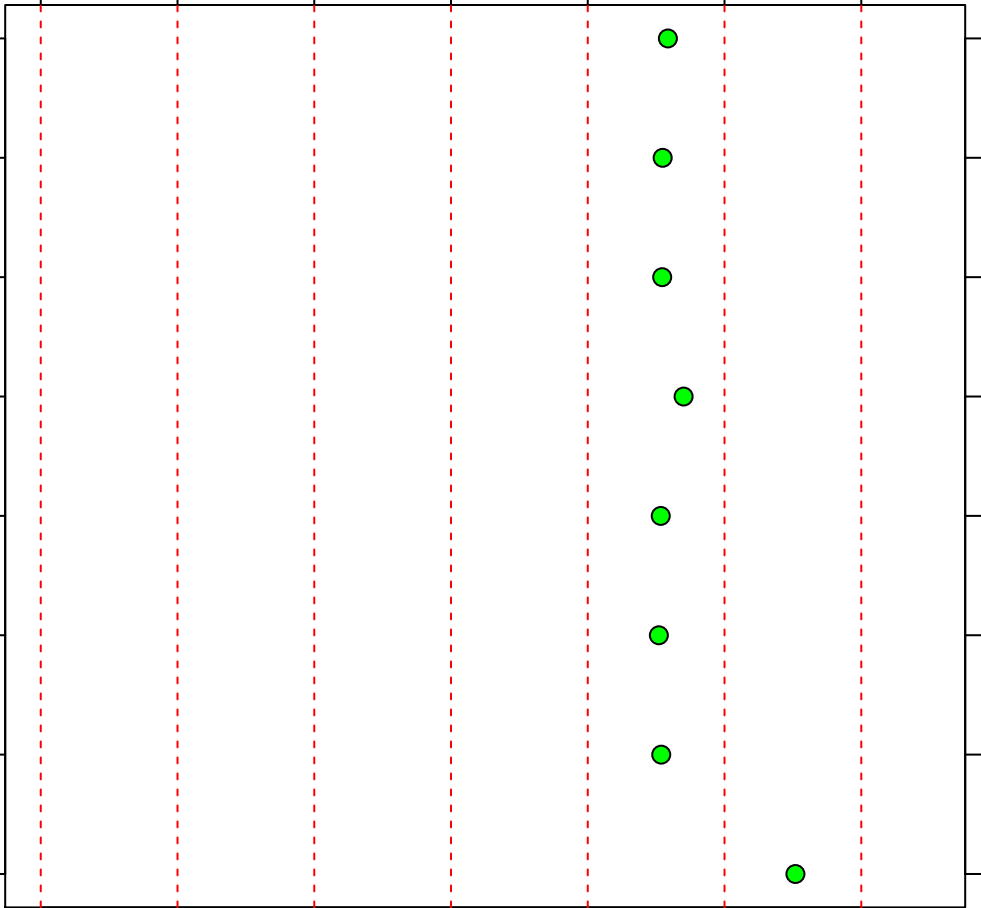

# Patient\_18 3 oclock

'phantom least similar to TG43'

D(Y, N, B, B)

D(Y, N, B, N)

D(Y, N, B, M)

D(N, N, N, N)

D(Y, N, N, N)

D(Y, N, M, M)

D(Y, M, X, X)

D(N, M, X, X)

'phantom most similar to TG43'

-10 -8 -6 -4 -2 0 2

%diff 100\*(GBBS-TG43)/TG43

GBBS(solid model applicator, body, balloon & rectal contrast, packing contrast)

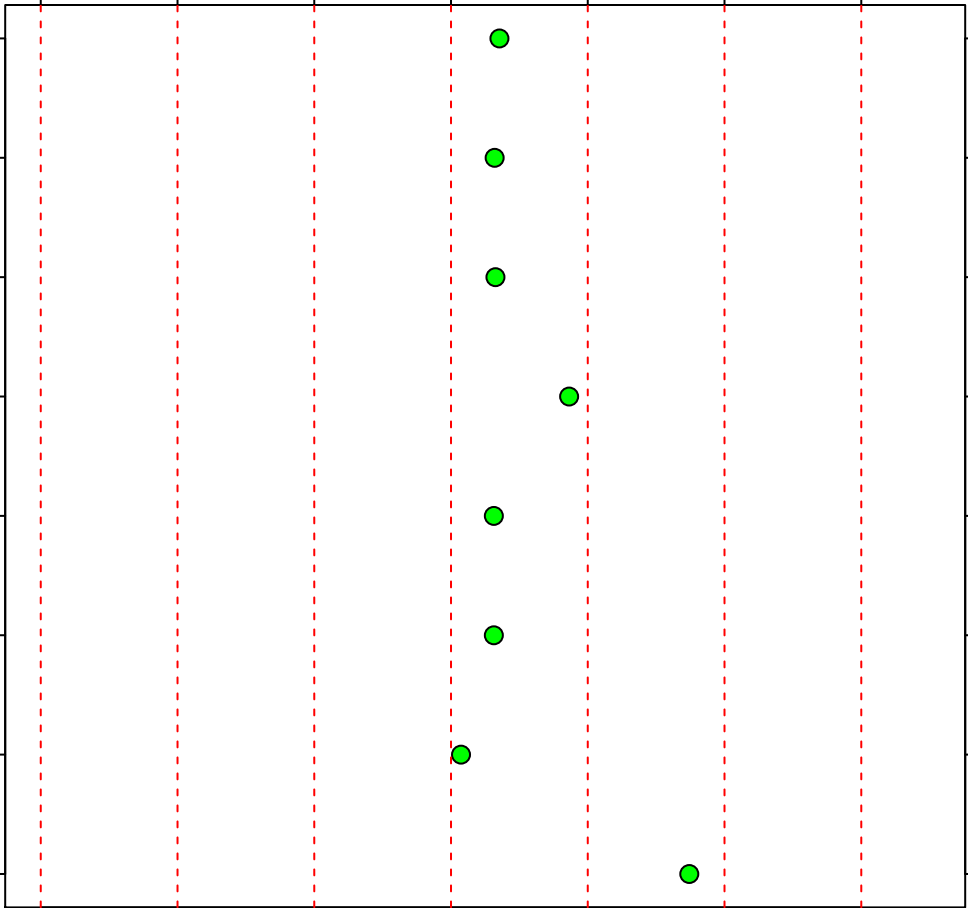

# Patient\_19 3 oclock

'phantom least similar to TG43'

D(Y, N, B, B)

D(Y, N, B, N)

D(Y, N, B, M)

D(N, N, N, N)

D(Y, N, N, N)

D(Y, N, M, M)

D(Y, M, X, X)

D(N, M, X, X)

'phantom most similar to TG43'

-10 -8 -6 -4 -2 0 2

%diff 100\*(GBBS-TG43)/TG43

GBBS(solid model applicator, body, balloon & rectal contrast, packing contrast)

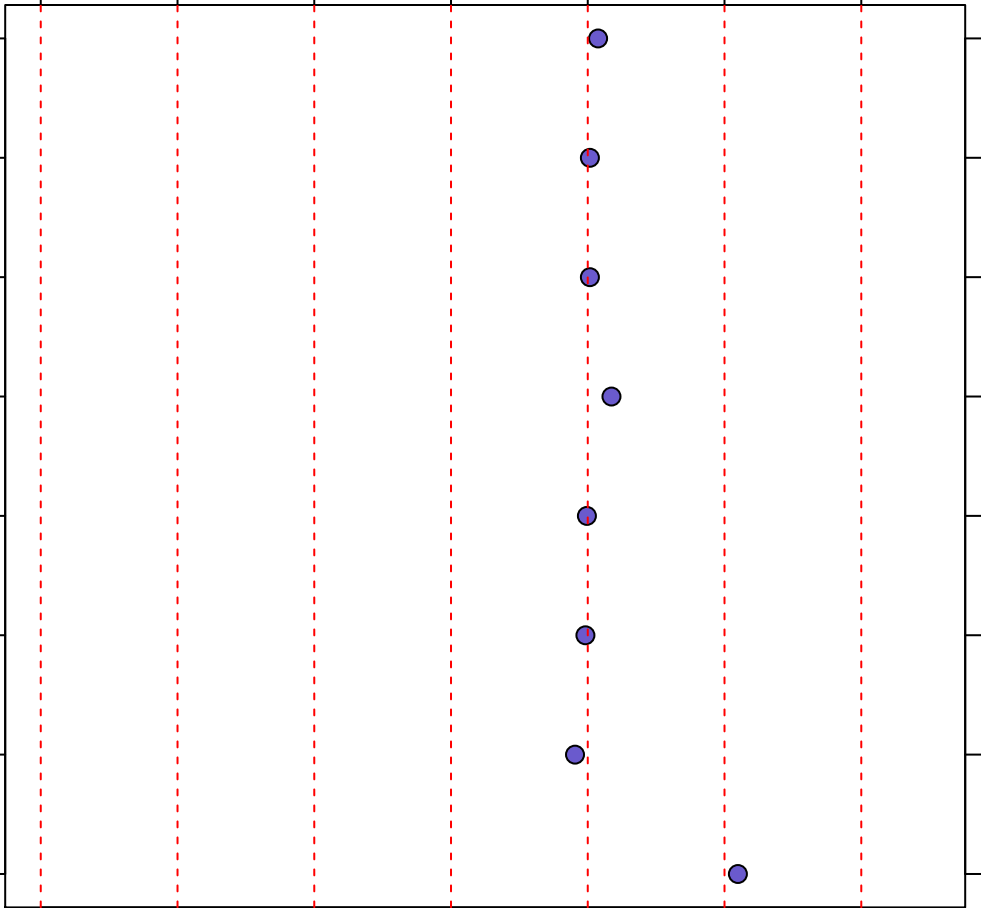



# Patient\_20 3 oclock

'phantom least similar to TG43'

D(Y, N, B, B)

D(Y, N, B, N)

D(Y, N, B, M)

D(N, N, N, N)

D(Y, N, N, N)

D(Y, N, M, M)

D(Y, M, X, X)

D(N, M, X, X)

'phantom most similar to TG43'

-10

-8

-6

-4

-2

0

2

%diff 100\*(GBBS-TG43)/TG43

GBBS(solid model applicator, body, balloon & rectal contrast, packing contrast)

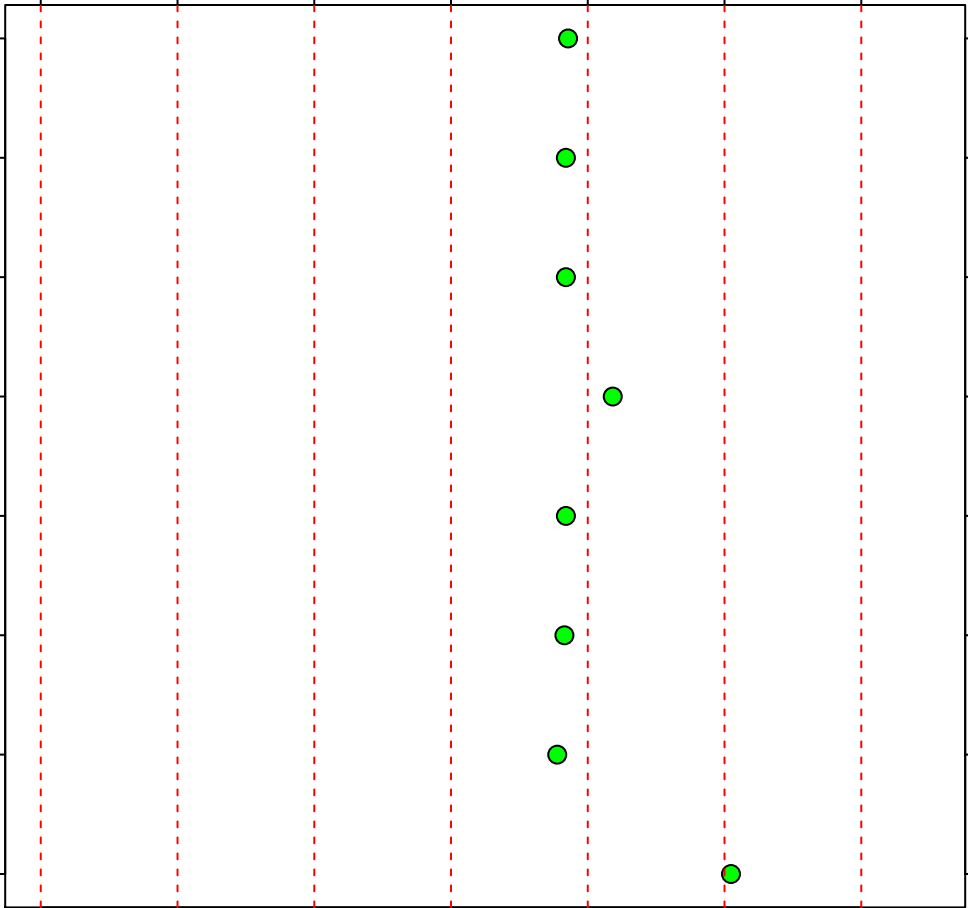

# Patient\_21 3 oclock

'phantom least similar to TG43'

D(Y, N, B, B)

D(Y, N, B, N)

D(Y, N, B, M)

D(N, N, N, N)

D(Y, N, N, N)

D(Y, N, M, M)

D(Y, M, X, X)

D(N, M, X, X)

'phantom most similar to TG43'

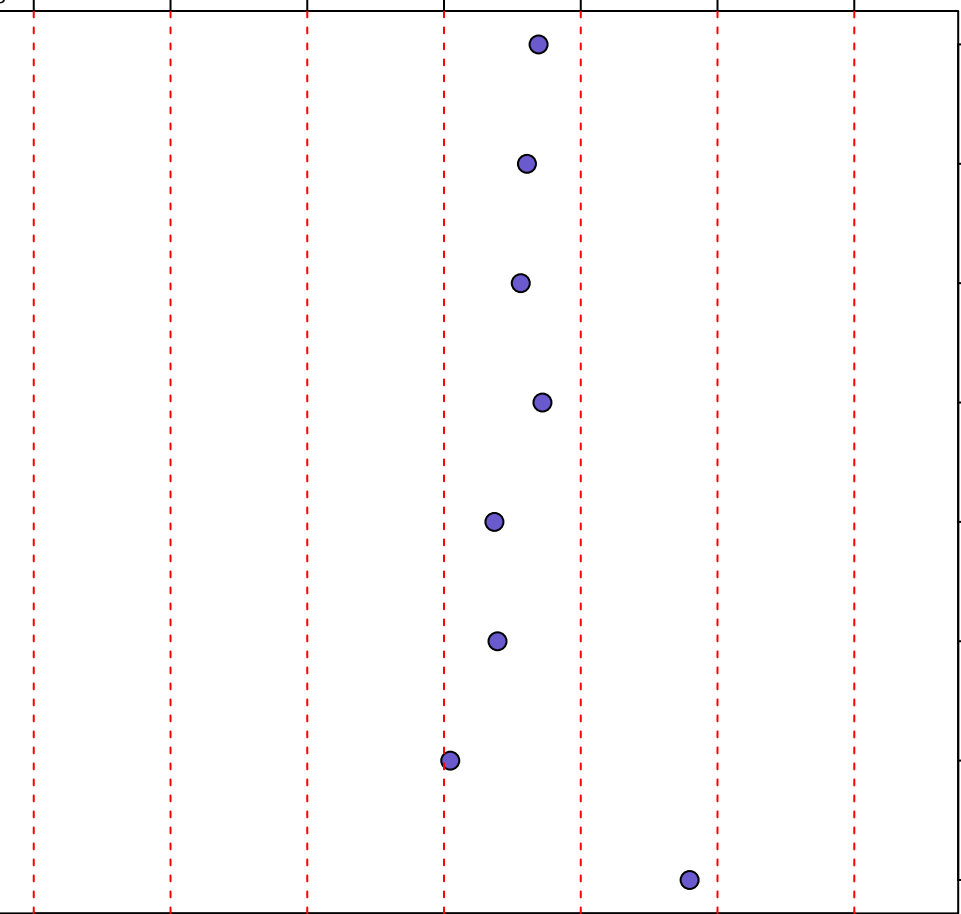

%diff 100\*(GBBS-TG43)/TG43

GBBS(solid model applicator, body, balloon & rectal contrast, packing contrast)

# Patient\_22 3 oclock

'phantom least similar to TG43'

D(Y, N, B, B)

D(Y, N, B, N)

D(Y, N, B, M)

D(N, N, N, N)

D(Y, N, N, N)

D(Y, N, M, M)

D(Y, M, X, X)

D(N, M, X, X)

'phantom most similar to TG43'

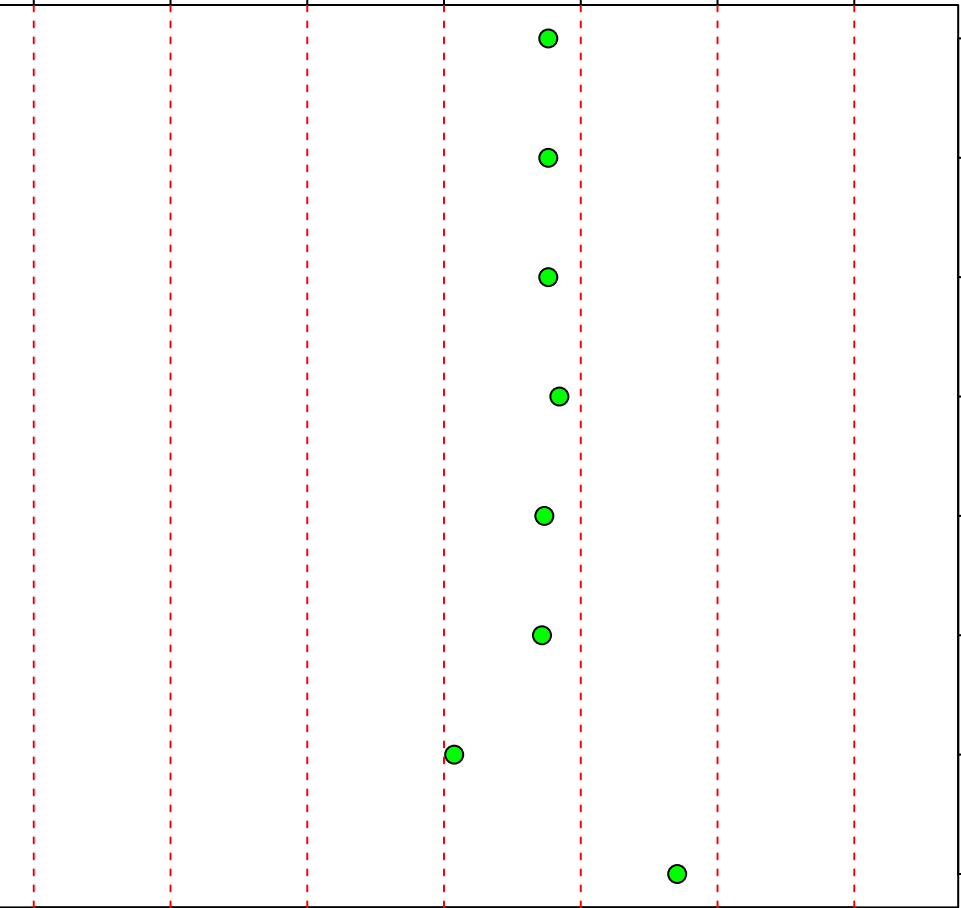

%diff 100\*(GBBS-TG43)/TG43

GBBS(solid model applicator, body, balloon & rectal contrast, packing contrast)

# Patient\_23 3 oclock

'phantom least similar to TG43'

D(Y, N, B, B)

D(Y, N, B, N)

D(Y, N, B, M)

D(N, N, N, N)

D(Y, N, N, N)

D(Y, N, M, M)

D(Y, M, X, X)

D(N, M, X, X)

'phantom most similar to TG43'

-10 -8 -6 -4 -2 0 2

%diff 100\*(GBBS-TG43)/TG43

GBBS(solid model applicator, body, balloon & rectal contrast, packing contrast)

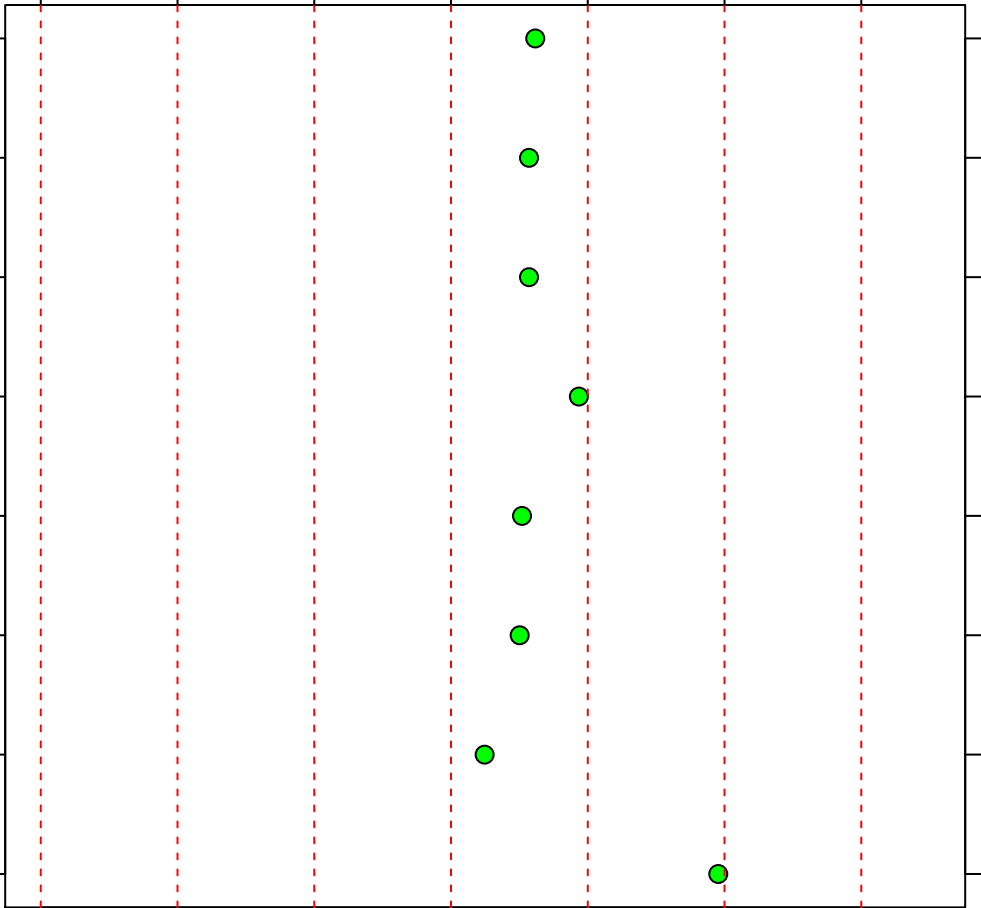

# Patient\_24 3 oclock

'phantom least similar to TG43'

D(Y, N, B, B)

D(Y, N, B, N)

D(Y, N, B, M)

D(N, N, N, N)

D(Y, N, N, N)

D(Y, N, M, M)

D(Y, M, X, X)

D(N, M, X, X)

'phantom most similar to TG43'

-10

-8

-6

-4

-2

0

2

%diff 100\*(GBBS-TG43)/TG43

GBBS(solid model applicator, body, balloon & rectal contrast, packing contrast)

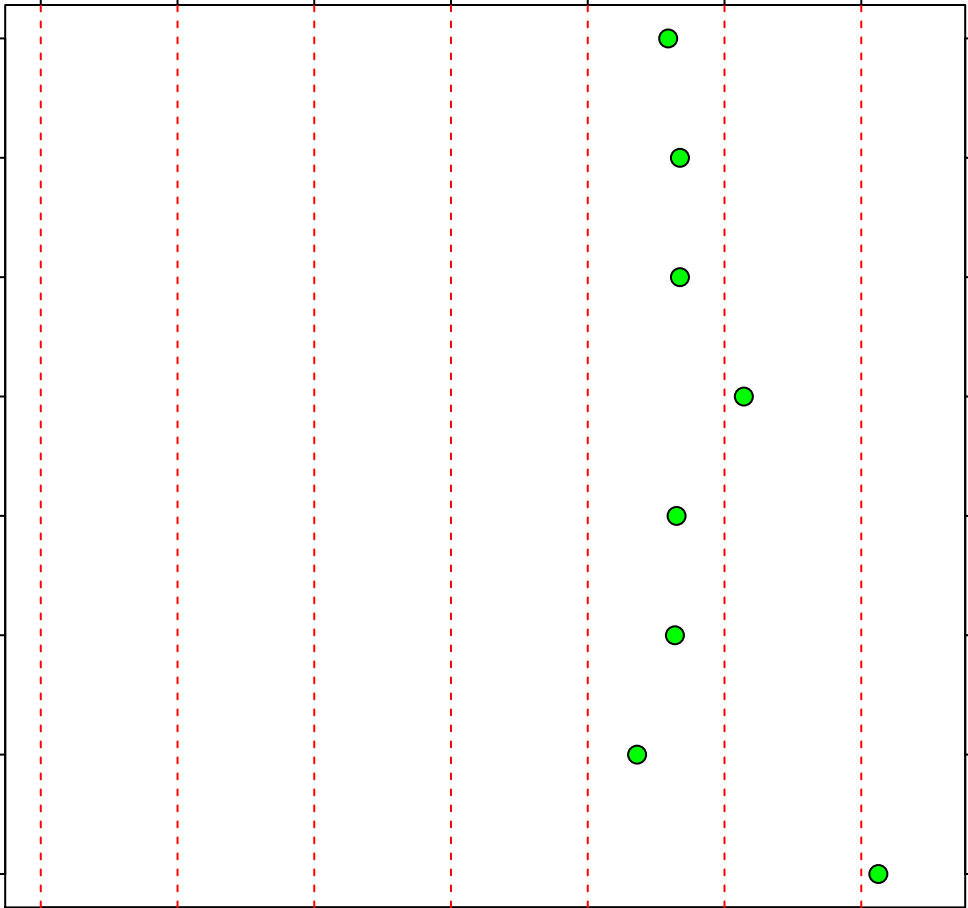

# Patient\_25 3 oclock

'phantom least similar to TG43'

D(Y, N, B, B)

D(Y, N, B, N)

D(Y, N, B, M)

D(N, N, N, N)

D(Y, N, N, N)

D(Y, N, M, M)

D(Y, M, X, X)

D(N, M, X, X)

'phantom most similar to TG43'

-10

-8

-6

-4

-2

0

2

%diff 100\*(GBBS-TG43)/TG43

GBBS(solid model applicator, body, balloon & rectal contrast, packing contrast)

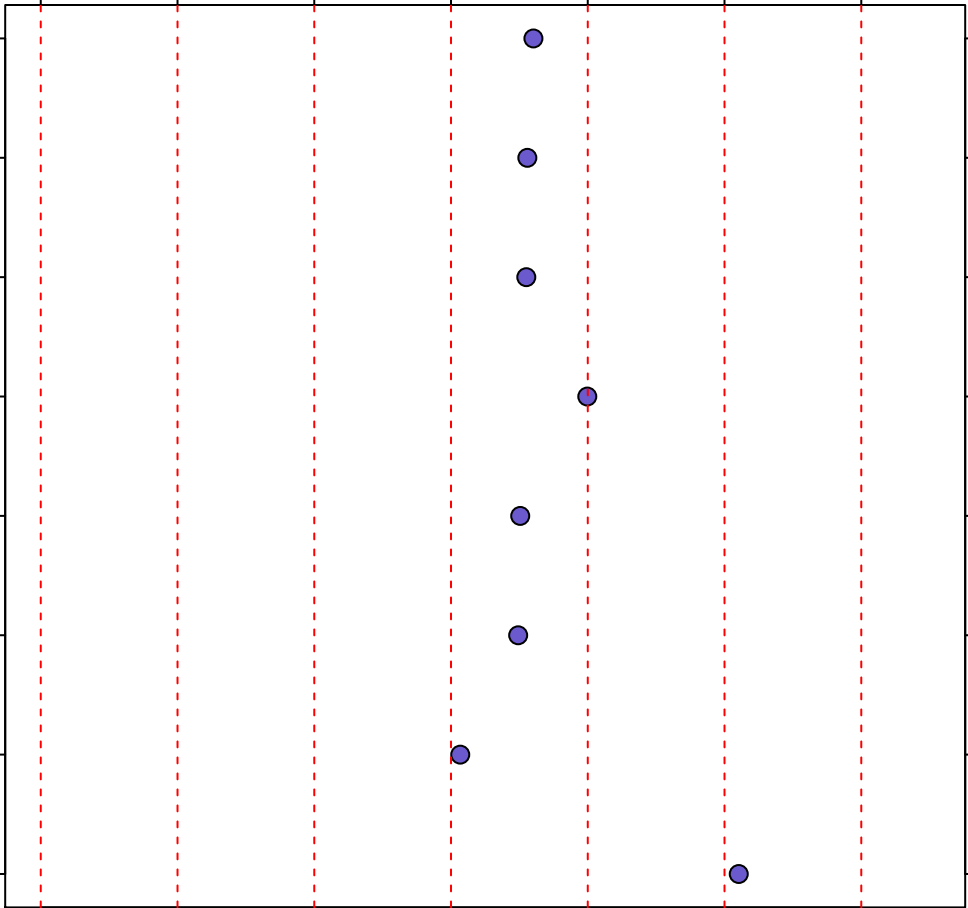

# Patient\_26 3 oclock

'phantom least similar to TG43'

D(Y, N, B, B)

D(Y, N, B, N)

D(Y, N, B, M)

D(N, N, N, N)

D(Y, N, N, N)

D(Y, N, M, M)

D(Y, M, X, X)

D(N, M, X, X)

'phantom most similar to TG43'

-10

-8

-6

-4

-2

0

2

%diff 100\*(GBBS-TG43)/TG43

GBBS(solid model applicator, body, balloon & rectal contrast, packing contrast)

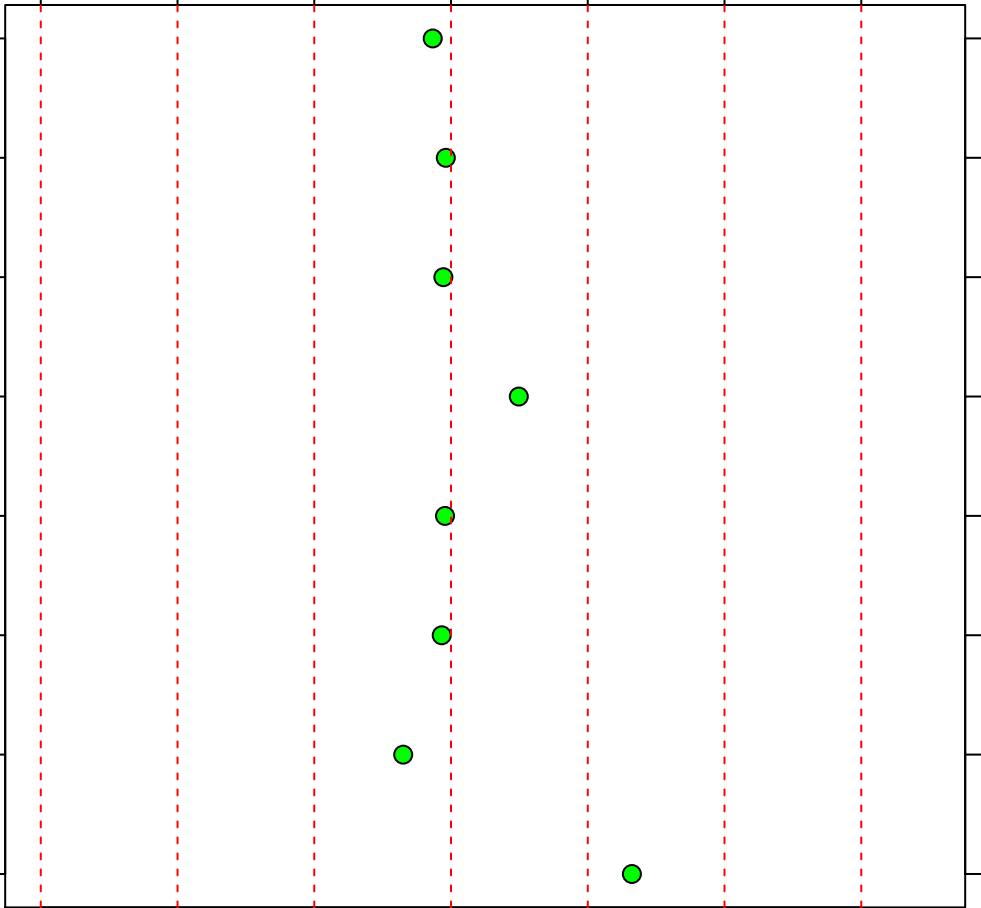

# Patient\_01 9 oclock

'phantom least similar to TG43'

D(Y, N, B, B)

D(Y, N, B, N)

D(Y, N, B, M)

D(N, N, N, N)

D(Y, N, N, N)

D(Y, N, M, M)

D(Y, M, X, X)

D(N, M, X, X)

'phantom most similar to TG43'

-10 -8 -6 -4 -2 0 2

%diff 100\*(GBBS-TG43)/TG43

GBBS(solid model applicator, body, balloon & rectal contrast, packing contrast)

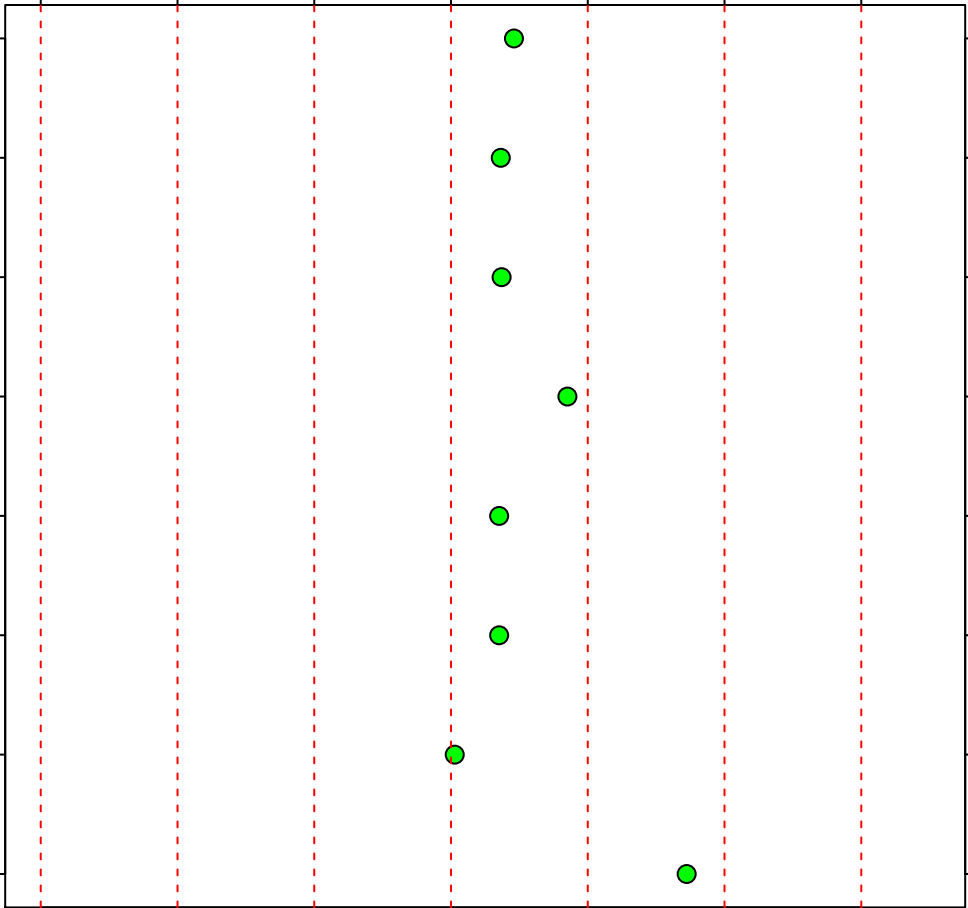



# Patient\_02 9 oclock

'phantom least similar to TG43'

D(Y, N, B, B)

D(Y, N, B, N)

D(Y, N, B, M)

D(N, N, N, N)

D(Y, N, N, N)

D(Y, N, M, M)

D(Y, M, X, X)

D(N, M, X, X)

'phantom most similar to TG43'

-10 -8 -6 -4 -2 0 2

%diff 100\*(GBBS-TG43)/TG43

GBBS(solid model applicator, body, balloon & rectal contrast, packing contrast)

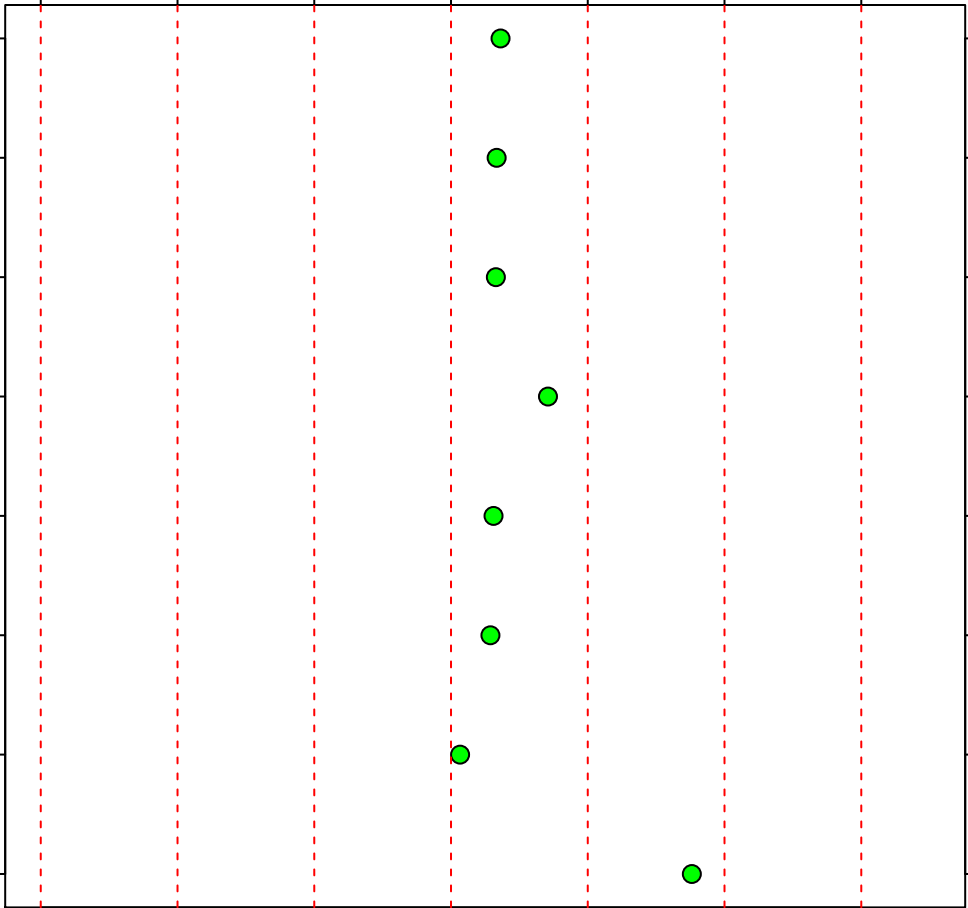

# Patient\_03 9 oclock

'phantom least similar to TG43'

D(Y, N, B, B)

D(Y, N, B, N)

D(Y, N, B, M)

D(N, N, N, N)

D(Y, N, N, N)

D(Y, N, M, M)

D(Y, M, X, X)

D(N, M, X, X)

'phantom most similar to TG43'

-10 -8 -6 -4 -2 0 2

%diff 100\*(GBBS-TG43)/TG43

GBBS(solid model applicator, body, balloon & rectal contrast, packing contrast)

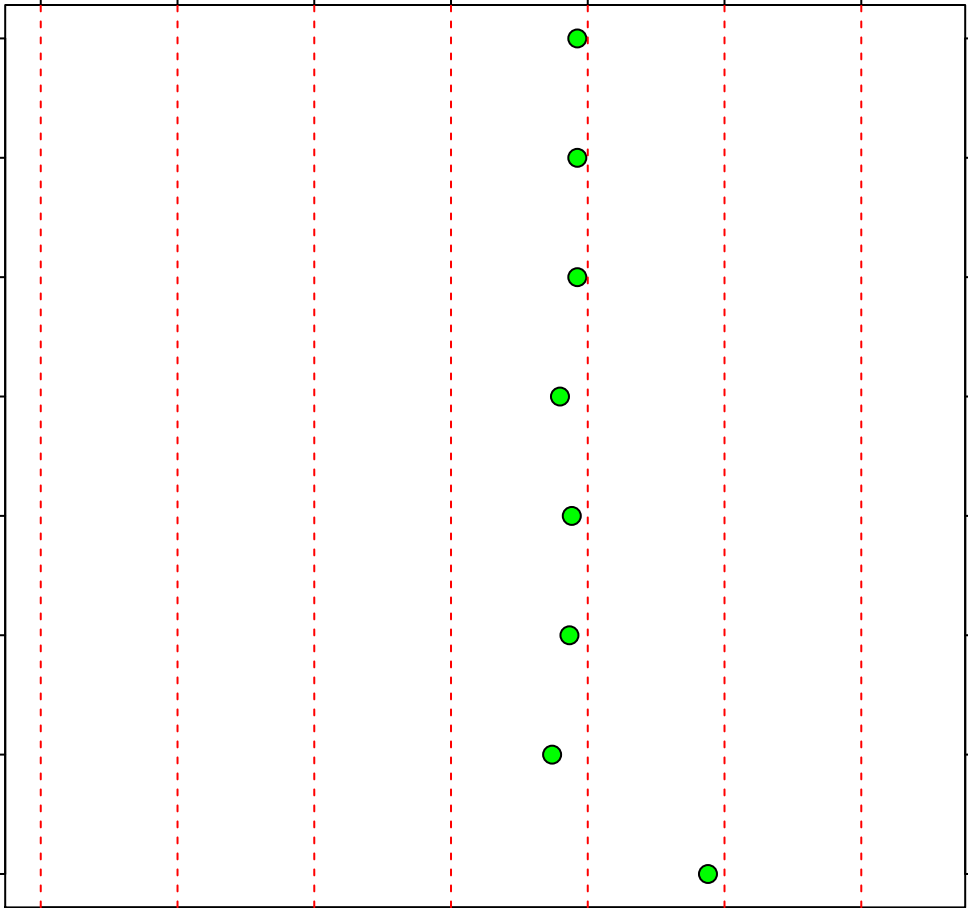

# Patient\_04 9 oclock

'phantom least similar to TG43'

D(Y, N, B, B)

D(Y, N, B, N)

D(Y, N, B, M)

D(N, N, N, N)

D(Y, N, N, N)

D(Y, N, M, M)

D(Y, M, X, X)

D(N, M, X, X)

'phantom most similar to TG43'

-10

-8

-6

-4

-2

0

2

%diff 100\*(GBBS-TG43)/TG43

GBBS(solid model applicator, body, balloon & rectal contrast, packing contrast)

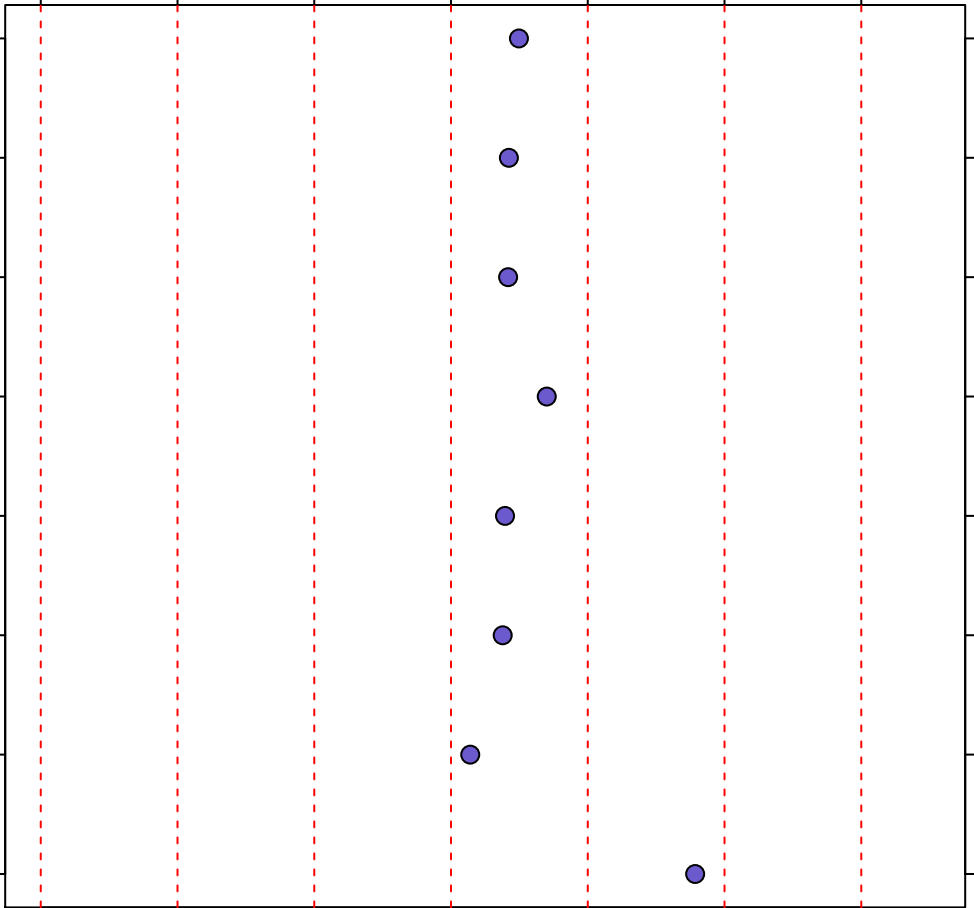

# Patient\_05 9 oclock

'phantom least similar to TG43'

D(Y, N, B, B)

D(Y, N, B, N)

D(Y, N, B, M)

D(N, N, N, N)

D(Y, N, N, N)

D(Y, N, M, M)

D(Y, M, X, X)

D(N, M, X, X)

'phantom most similar to TG43'

-10

-8

-6

-4

-2

0

2

%diff 100\*(GBBS-TG43)/TG43

GBBS(solid model applicator, body, balloon & rectal contrast, packing contrast)

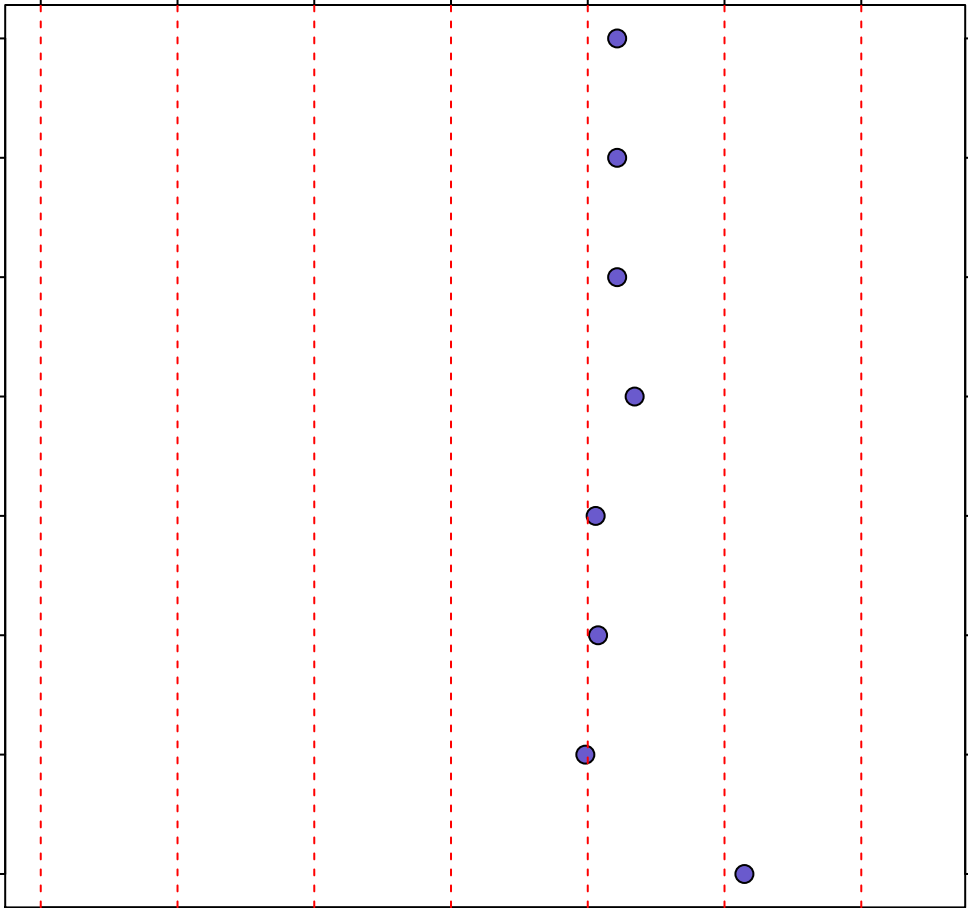

# Patient\_06 9 oclock

'phantom least similar to TG43'

D(Y, N, B, B)

D(Y, N, B, N)

D(Y, N, B, M)

D(N, N, N, N)

D(Y, N, N, N)

D(Y, N, M, M)

D(Y, M, X, X)

D(N, M, X, X)

'phantom most similar to TG43'

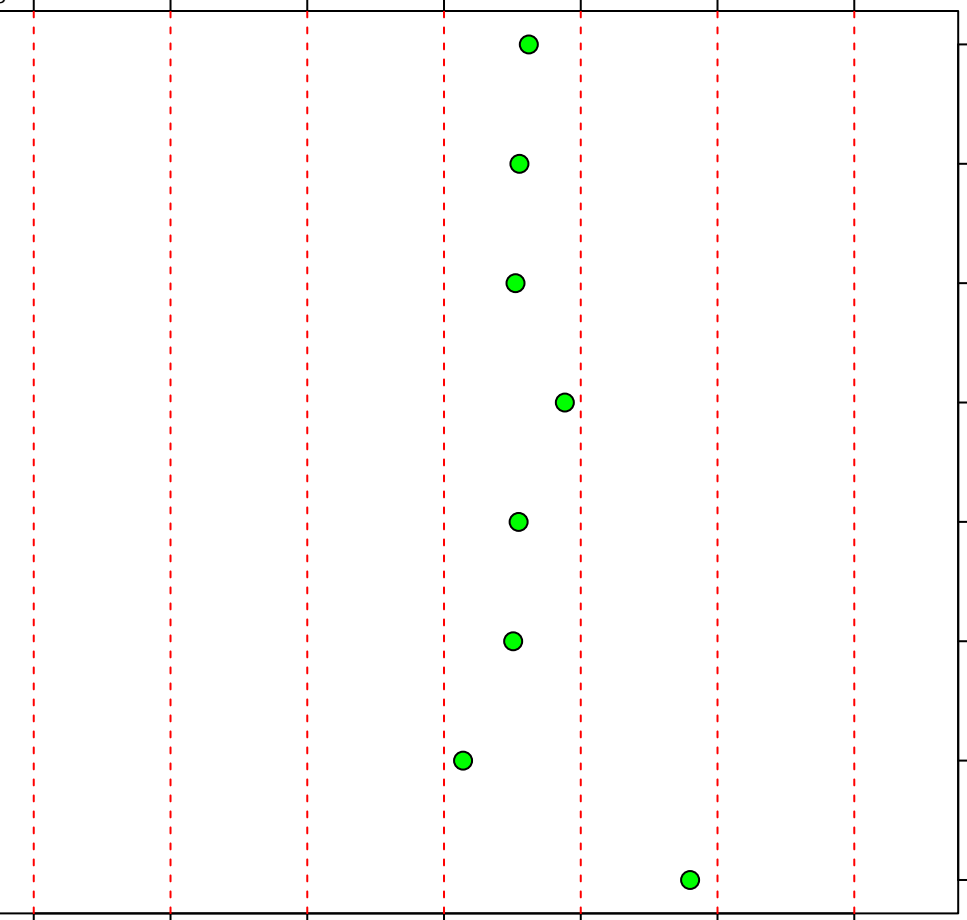

%diff 100\*(GBBS-TG43)/TG43

GBBS(solid model applicator, body, balloon & rectal contrast, packing contrast)

# Patient\_07 9 oclock

'phantom least similar to TG43'

D(Y, N, B, B)

D(Y, N, B, N)

D(Y, N, B, M)

D(N, N, N, N)

D(Y, N, N, N)

D(Y, N, M, M)

D(Y, M, X, X)

D(N, M, X, X)

'phantom most similar to TG43'



%diff 100\*(GBBS-TG43)/TG43

GBBS(solid model applicator, body, balloon & rectal contrast, packing contrast)

# Patient\_08 9 oclock

'phantom least similar to TG43'

D(Y, N, B, B)

D(Y, N, B, N)

D(Y, N, B, M)

D(N, N, N, N)

D(Y, N, N, N)

D(Y, N, M, M)

D(Y, M, X, X)

D(N, M, X, X)

'phantom most similar to TG43'

-10

-8

-6

-4

-2

0

2

%diff 100\*(GBBS-TG43)/TG43

GBBS(solid model applicator, body, balloon & rectal contrast, packing contrast)

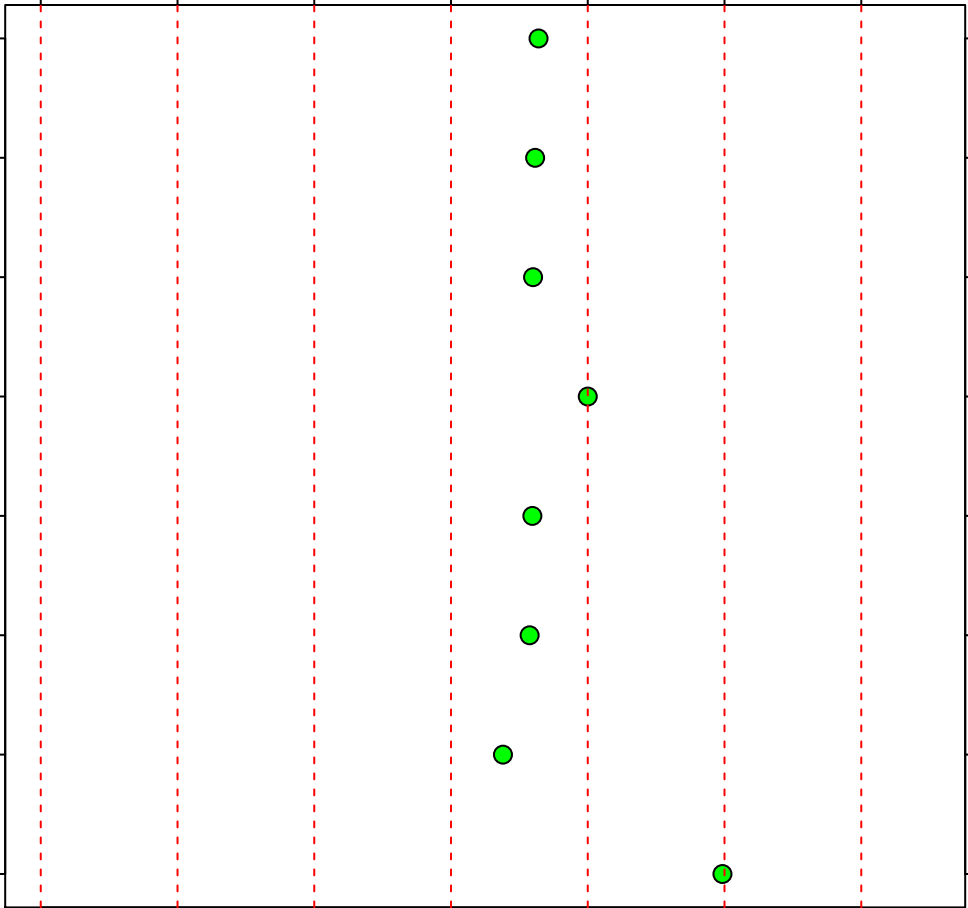

# Patient\_09 9 oclock

'phantom least similar to TG43'

D(Y, N, B, B)

D(Y, N, B, N)

D(Y, N, B, M)

D(N, N, N, N)

D(Y, N, N, N)

D(Y, N, M, M)

D(Y, M, X, X)

D(N, M, X, X)

'phantom most similar to TG43'

-10 -8 -6 -4 -2 0 2

%diff 100\*(GBBS-TG43)/TG43

GBBS(solid model applicator, body, balloon & rectal contrast, packing contrast)

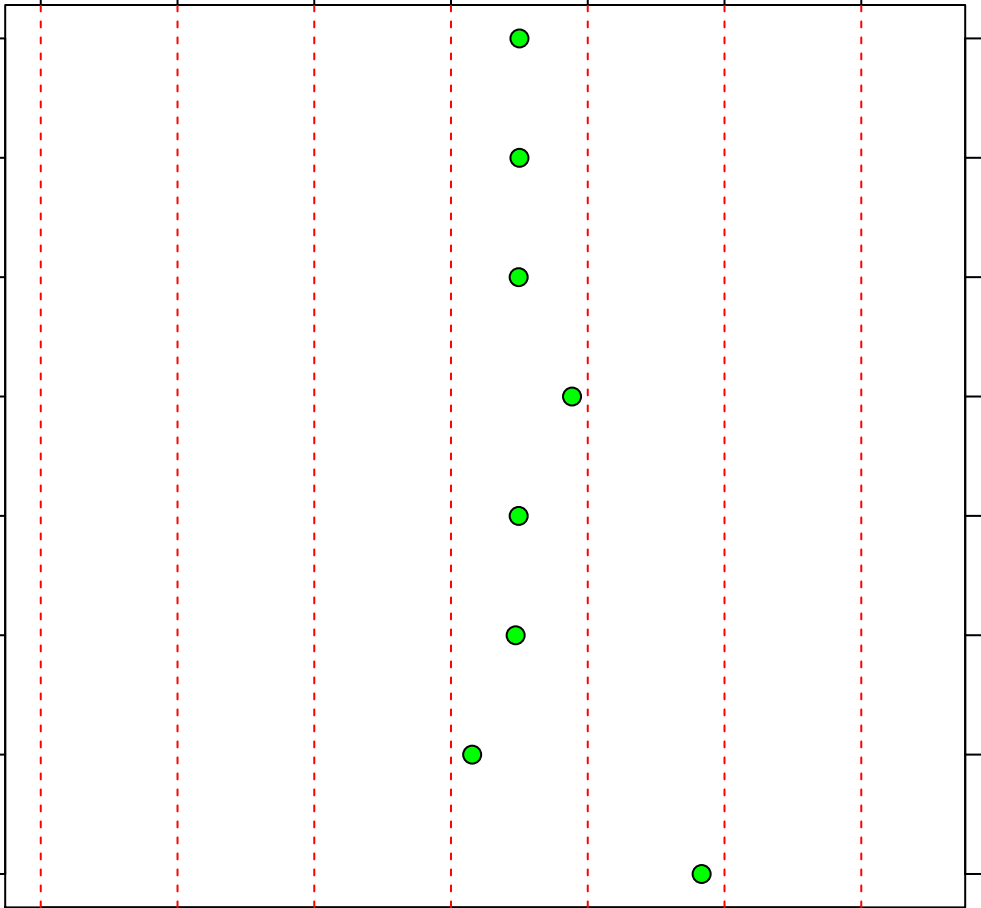



# Patient\_10 9 oclock

'phantom least similar to TG43'

D(Y, N, B, B)

D(Y, N, B, N)

D(Y, N, B, M)

D(N, N, N, N)

D(Y, N, N, N)

D(Y, N, M, M)

D(Y, M, X, X)

D(N, M, X, X)

'phantom most similar to TG43'

-10

-8

-6

-4

-2

0

2

%diff 100\*(GBBS-TG43)/TG43

GBBS(solid model applicator, body, balloon & rectal contrast, packing contrast)

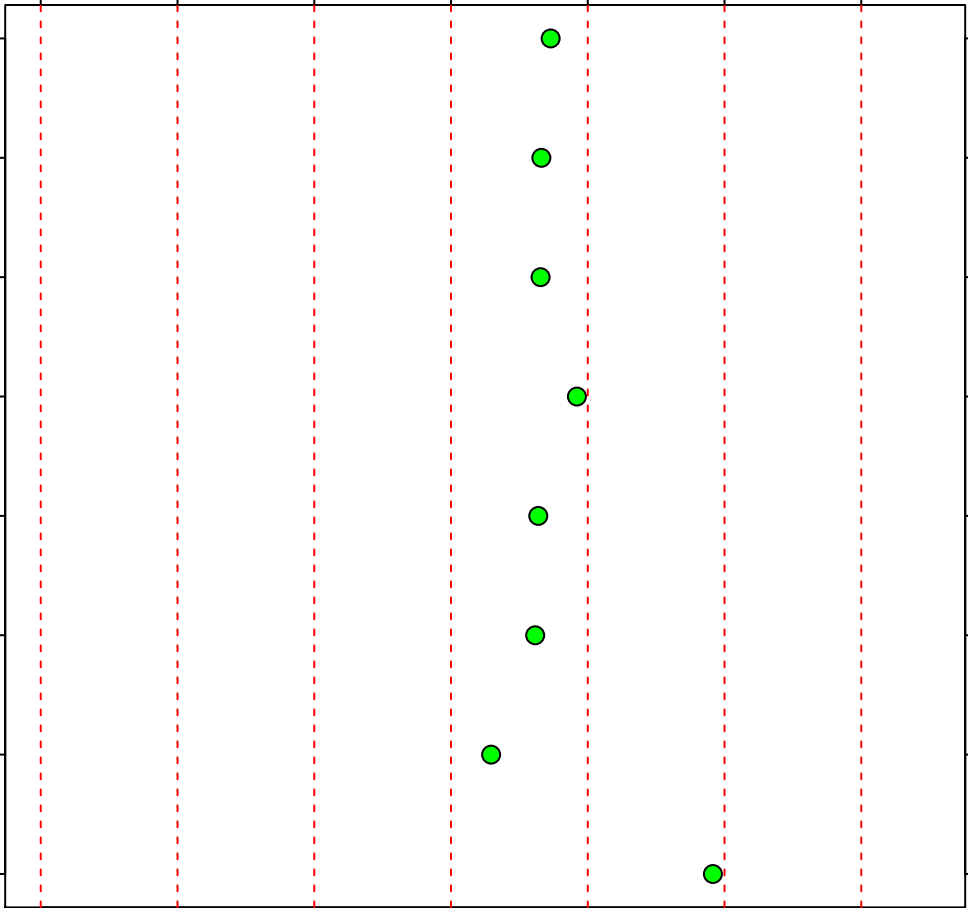

# Patient\_11 9 oclock

'phantom least similar to TG43'

- D(Y, N, B, B)
- D(Y, N, B, N)
- D(Y, N, B, M)
- D(N, N, N, N)
- D(Y, N, N, N)
- D(Y, N, M, M)
- D(Y, M, X, X)
- D(N, M, X, X)

'phantom most similar to TG43'

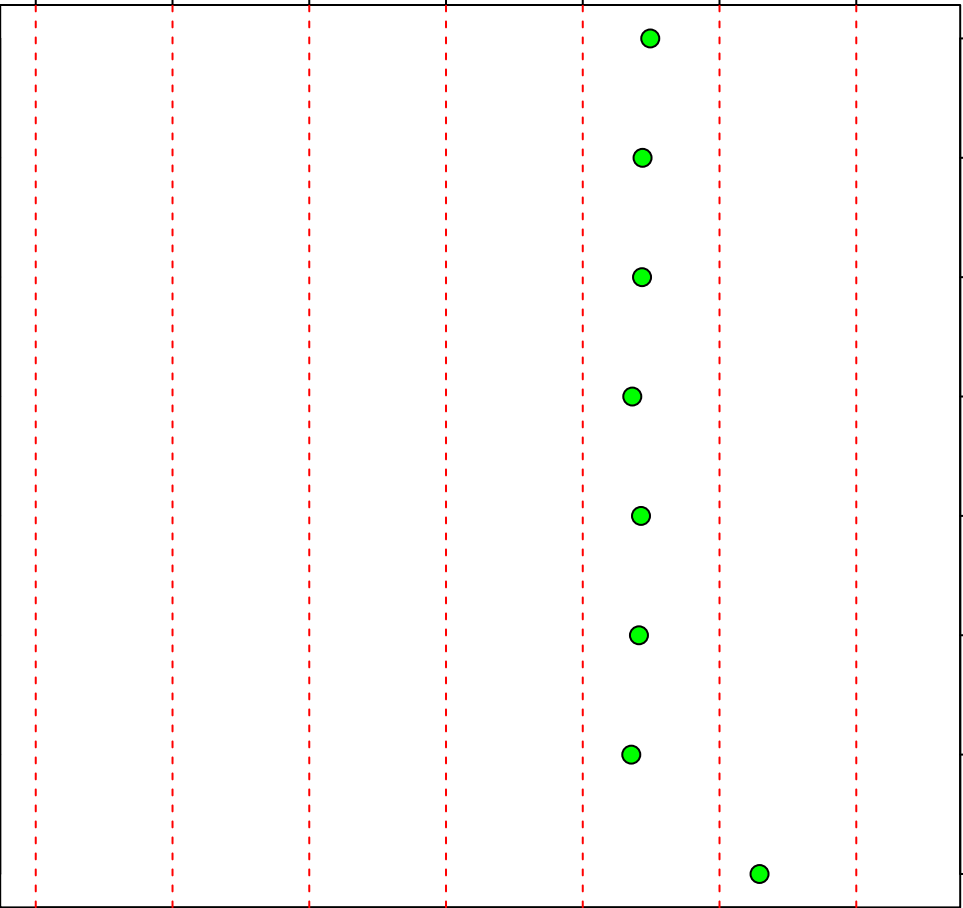

%diff 100\*(GBBS-TG43)/TG43

GBBS(solid model applicator, body, balloon & rectal contrast, packing contrast)

# Patient\_12 9 oclock

'phantom least similar to TG43'

D(Y, N, B, B)

D(Y, N, B, N)

D(Y, N, B, M)

D(N, N, N, N)

D(Y, N, N, N)

D(Y, N, M, M)

D(Y, M, X, X)

D(N, M, X, X)

'phantom most similar to TG43'

-10

-8

-6

-4

-2

0

2

%diff 100\*(GBBS-TG43)/TG43

GBBS(solid model applicator, body, balloon & rectal contrast, packing contrast)

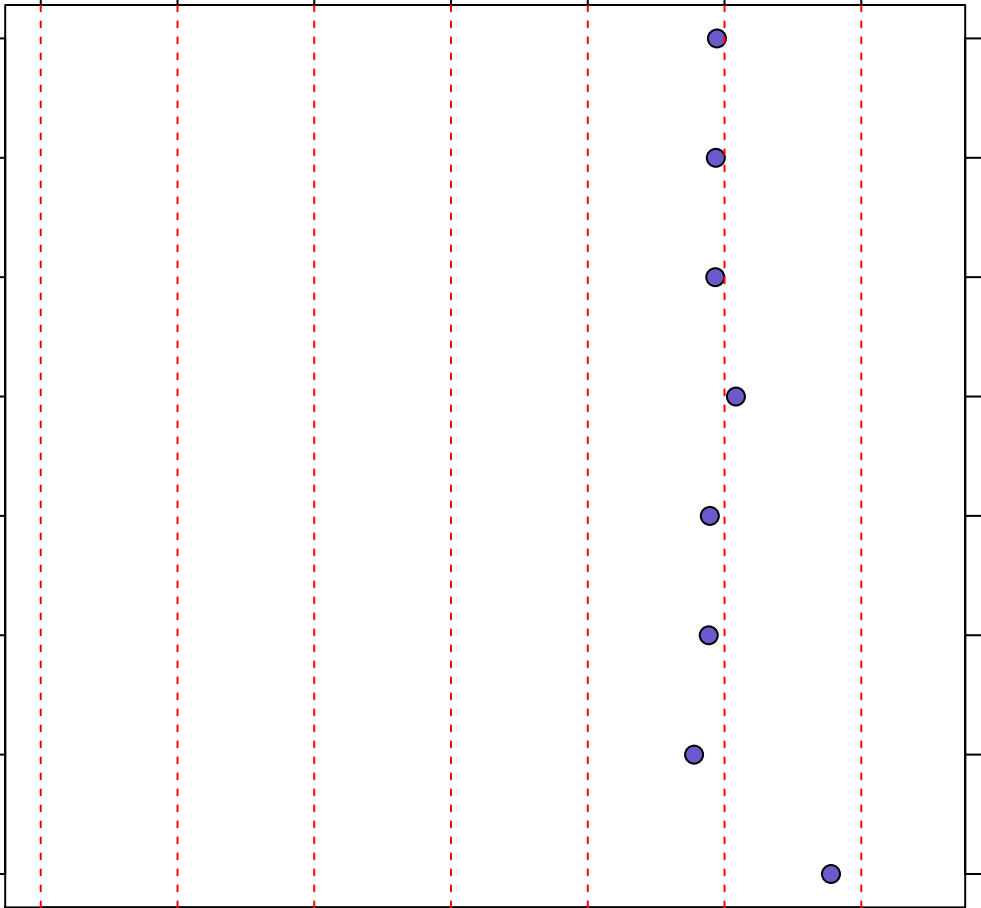

# Patient\_13 9 oclock

'phantom least similar to TG43'

D(Y, N, B, B)

D(Y, N, B, N)

D(Y, N, B, M)

D(N, N, N, N)

D(Y, N, N, N)

D(Y, N, M, M)

D(Y, M, X, X)

D(N, M, X, X)

'phantom most similar to TG43'

-10

-8

-6

-4

-2

0

2

%diff 100\*(GBBS-TG43)/TG43

GBBS(solid model applicator, body, balloon & rectal contrast, packing contrast)

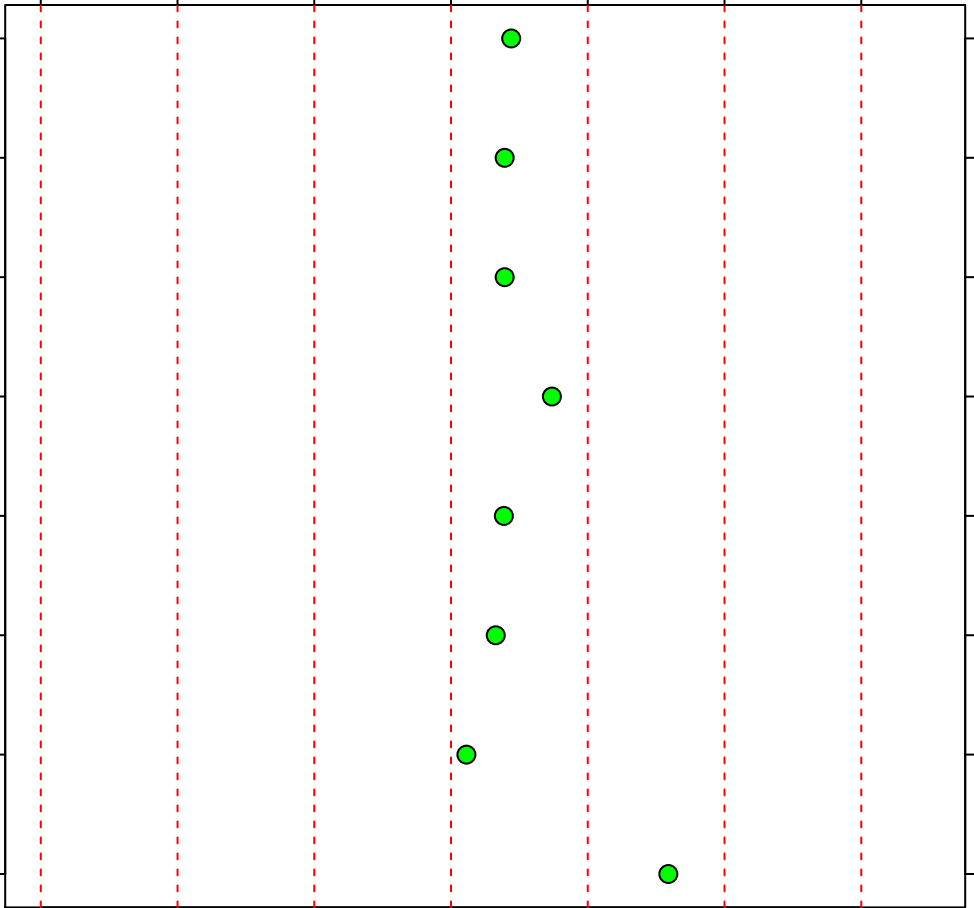

# Patient\_14 9 oclock

'phantom least similar to TG43'

D(Y, N, B, B)

D(Y, N, B, N)

D(Y, N, B, M)

D(N, N, N, N)

D(Y, N, N, N)

D(Y, N, M, M)

D(Y, M, X, X)

D(N, M, X, X)

'phantom most similar to TG43'

-10

-8

-6

-4

-2

0

2

%diff 100\*(GBBS-TG43)/TG43

GBBS(solid model applicator, body, balloon & rectal contrast, packing contrast)

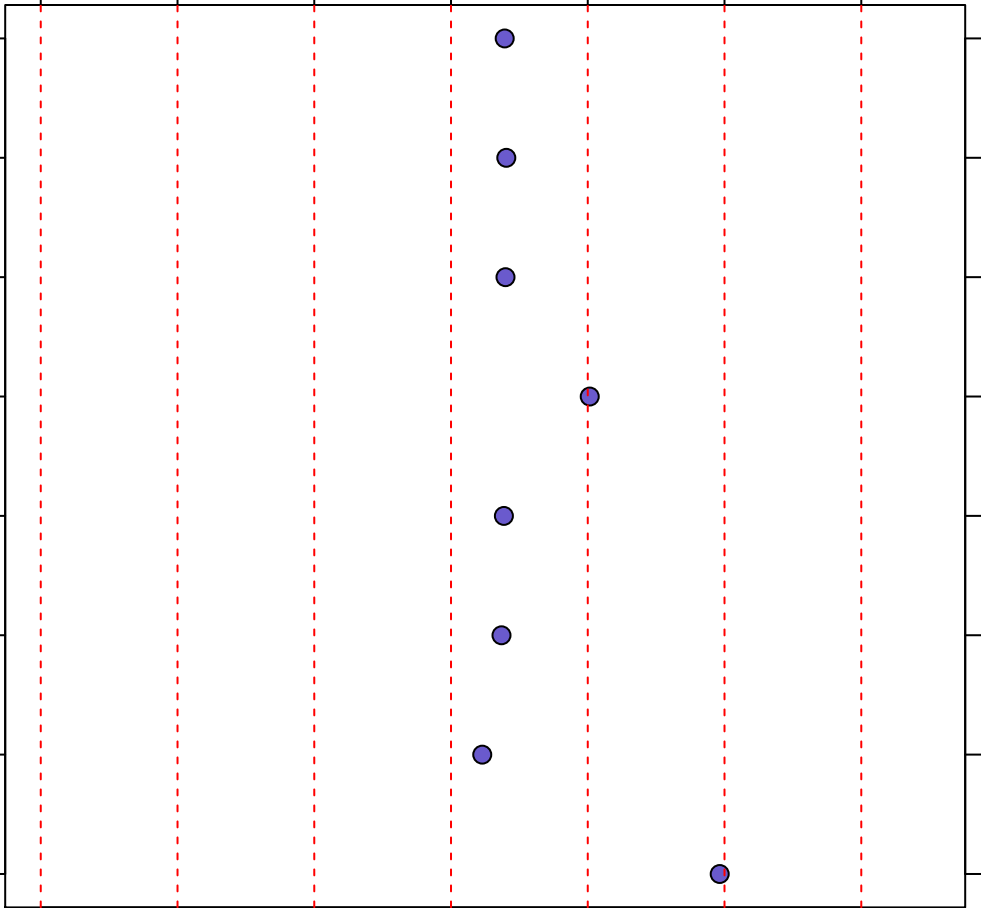

# Patient\_15 9 oclock

'phantom least similar to TG43'

D(Y, N, B, B)

D(Y, N, B, N)

D(Y, N, B, M)

D(N, N, N, N)

D(Y, N, N, N)

D(Y, N, M, M)

D(Y, M, X, X)

D(N, M, X, X)

'phantom most similar to TG43'

-10

-8

-6

-4

-2

0

2

%diff 100\*(GBBS-TG43)/TG43

GBBS(solid model applicator, body, balloon & rectal contrast, packing contrast)

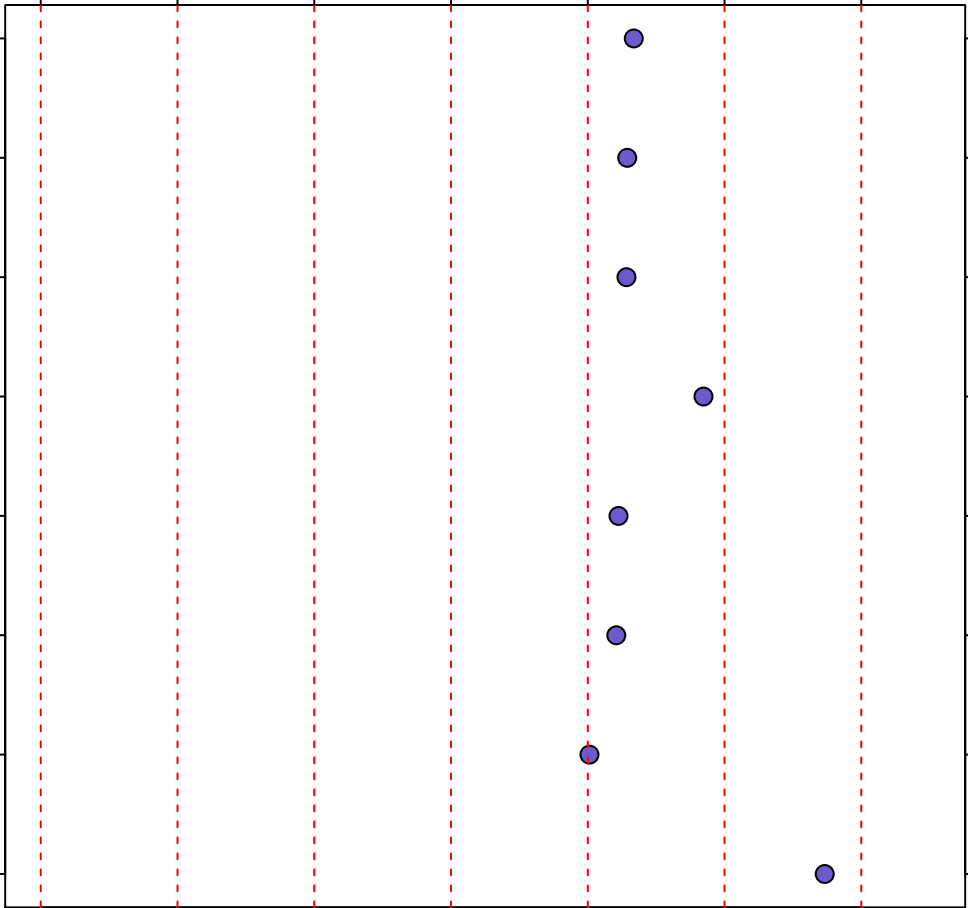

# Patient\_16 9 oclock

'phantom least similar to TG43'

D(Y, N, B, B)

D(Y, N, B, N)

D(Y, N, B, M)

D(N, N, N, N)

D(Y, N, N, N)

D(Y, N, M, M)

D(Y, M, X, X)

D(N, M, X, X)

'phantom most similar to TG43'

-10 -8 -6 -4 -2 0 2

%diff 100\*(GBBS-TG43)/TG43

GBBS(solid model applicator, body, balloon & rectal contrast, packing contrast)

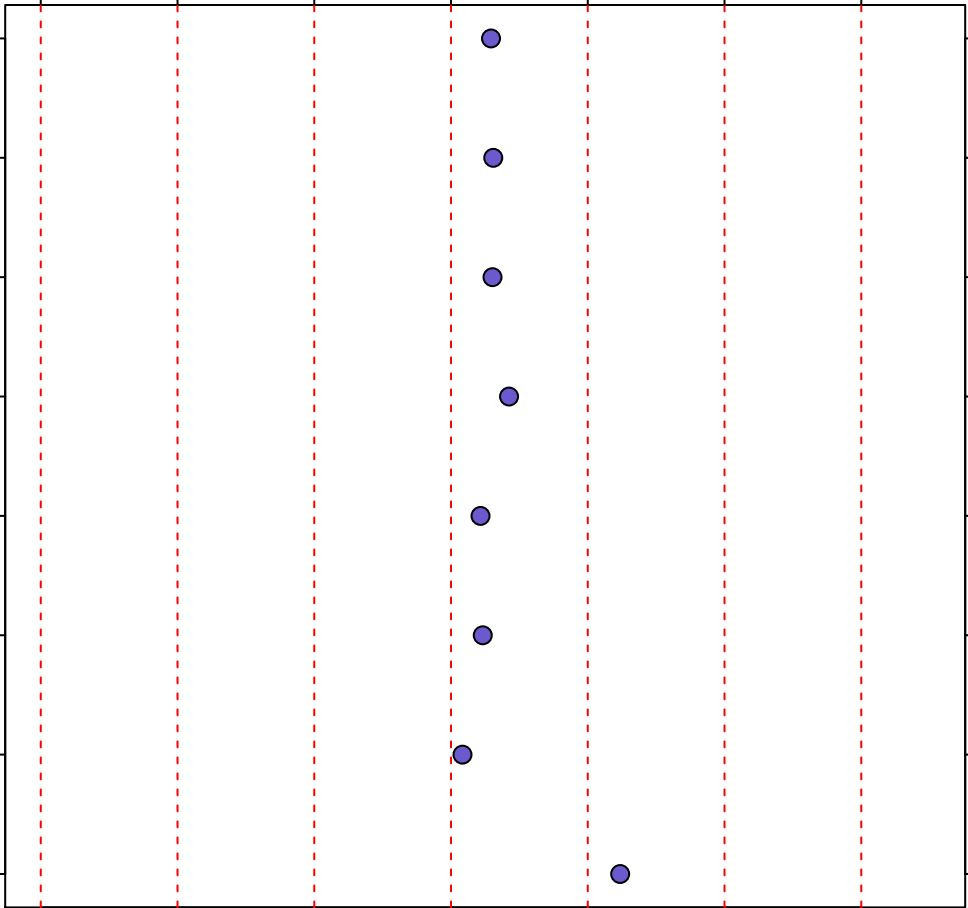

# Patient\_17 9 oclock

'phantom least similar to TG43'

D(Y, N, B, B)

D(Y, N, B, N)

D(Y, N, B, M)

D(N, N, N, N)

D(Y, N, N, N)

D(Y, N, M, M)

D(Y, M, X, X)

D(N, M, X, X)

'phantom most similar to TG43'

-10

-8

-6

-4

-2

0

2

%diff 100\*(GBBS-TG43)/TG43

GBBS(solid model applicator, body, balloon & rectal contrast, packing contrast)

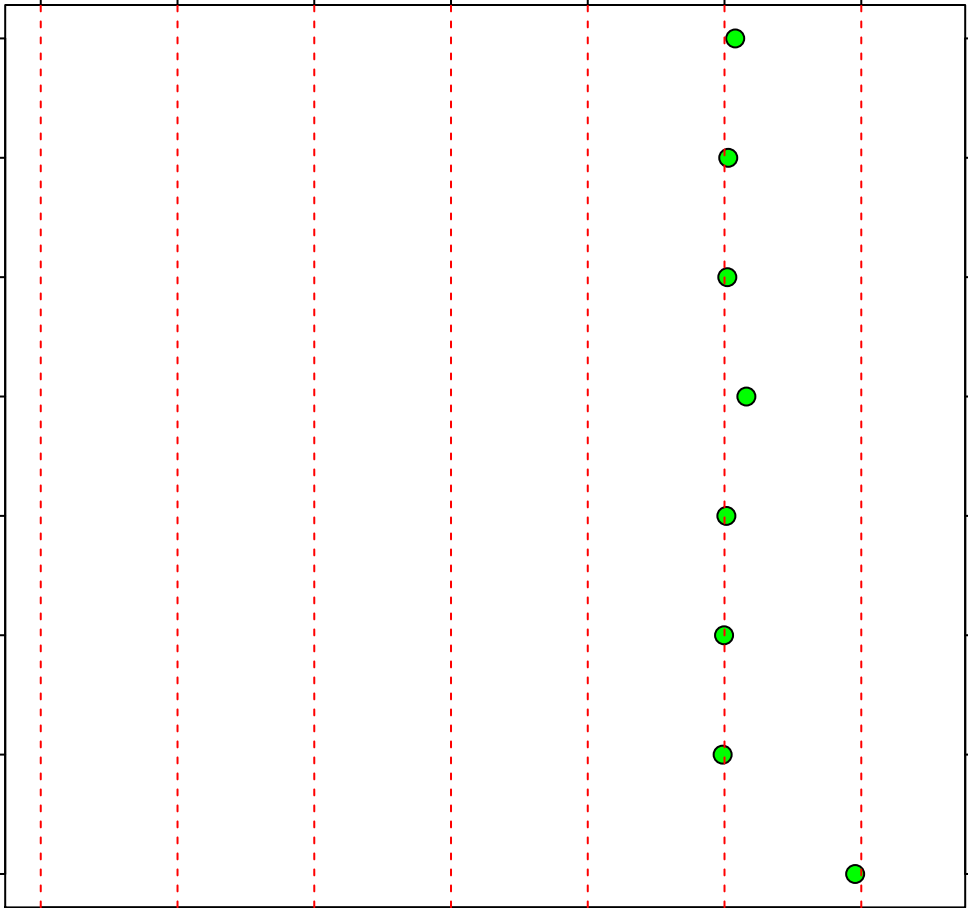



# Patient\_18 9 oclock

'phantom least similar to TG43'

D(Y, N, B, B)

D(Y, N, B, N)

D(Y, N, B, M)

D(N, N, N, N)

D(Y, N, N, N)

D(Y, N, M, M)

D(Y, M, X, X)

D(N, M, X, X)

'phantom most similar to TG43'

-10

-8

-6

-4

-2

0

2

%diff 100\*(GBBS-TG43)/TG43

GBBS(solid model applicator, body, balloon & rectal contrast, packing contrast)

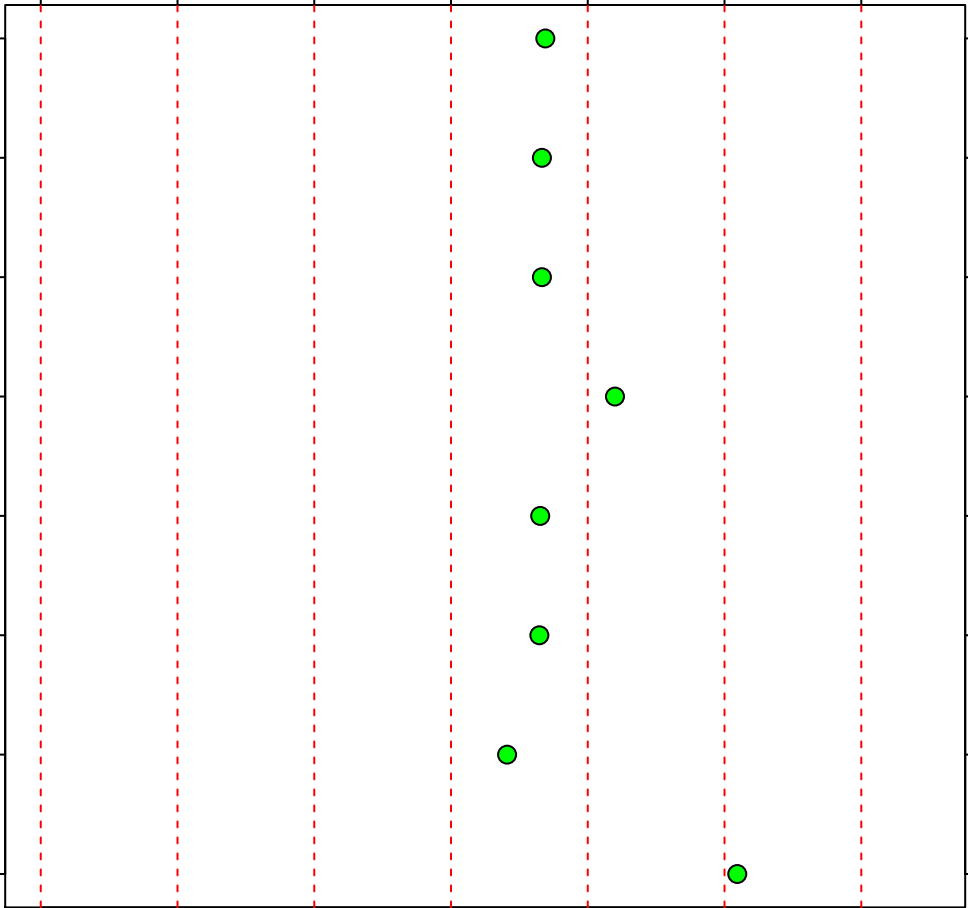

# Patient\_19 9 oclock

'phantom least similar to TG43'

D(Y, N, B, B)

D(Y, N, B, N)

D(Y, N, B, M)

D(N, N, N, N)

D(Y, N, N, N)

D(Y, N, M, M)

D(Y, M, X, X)

D(N, M, X, X)

'phantom most similar to TG43'

-10

-8

-6

-4

-2

0

2

%diff 100\*(GBBS-TG43)/TG43

GBBS(solid model applicator, body, balloon & rectal contrast, packing contrast)

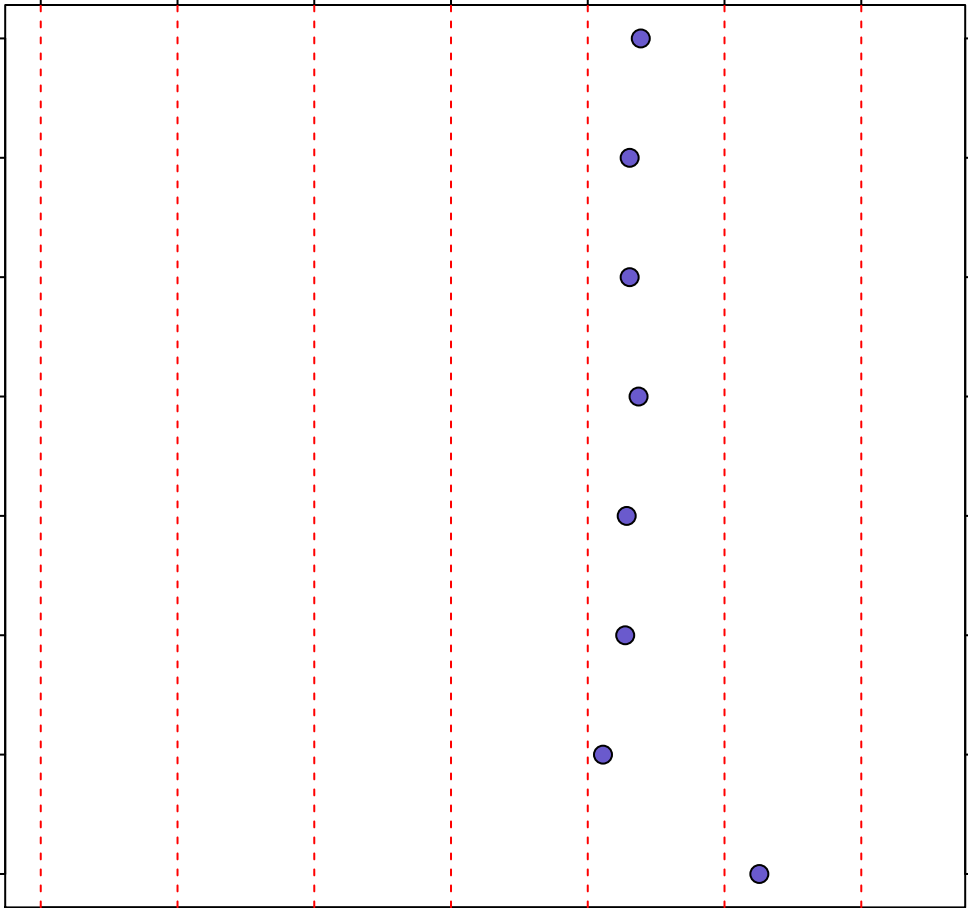

# Patient\_20 9 oclock

'phantom least similar to TG43'

D(Y, N, B, B)

D(Y, N, B, N)

D(Y, N, B, M)

D(N, N, N, N)

D(Y, N, N, N)

D(Y, N, M, M)

D(Y, M, X, X)

D(N, M, X, X)

'phantom most similar to TG43'

-10

-8

-6

-4

-2

0

2

%diff 100\*(GBBS-TG43)/TG43

GBBS(solid model applicator, body, balloon & rectal contrast, packing contrast)

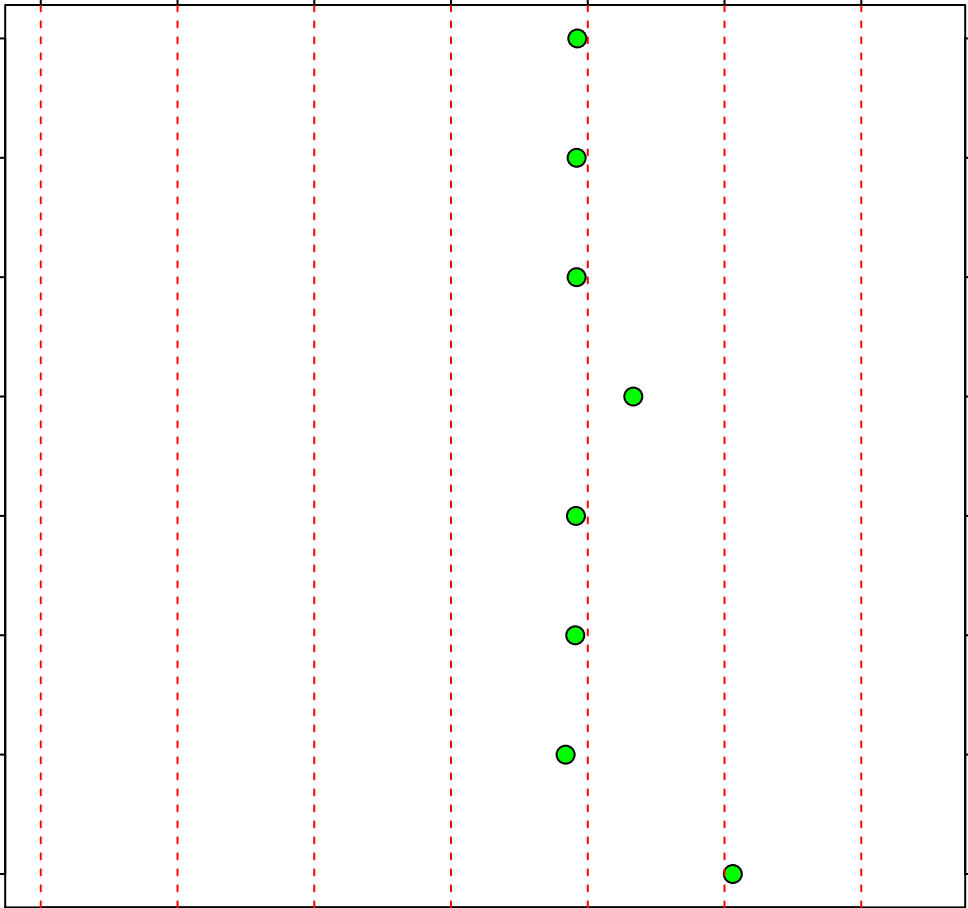

# Patient\_21 9 oclock

'phantom least similar to TG43'

D(Y, N, B, B)

D(Y, N, B, N)

D(Y, N, B, M)

D(N, N, N, N)

D(Y, N, N, N)

D(Y, N, M, M)

D(Y, M, X, X)

D(N, M, X, X)

'phantom most similar to TG43'

-10 -8 -6 -4 -2 0 2

%diff 100\*(GBBS-TG43)/TG43

GBBS(solid model applicator, body, balloon & rectal contrast, packing contrast)

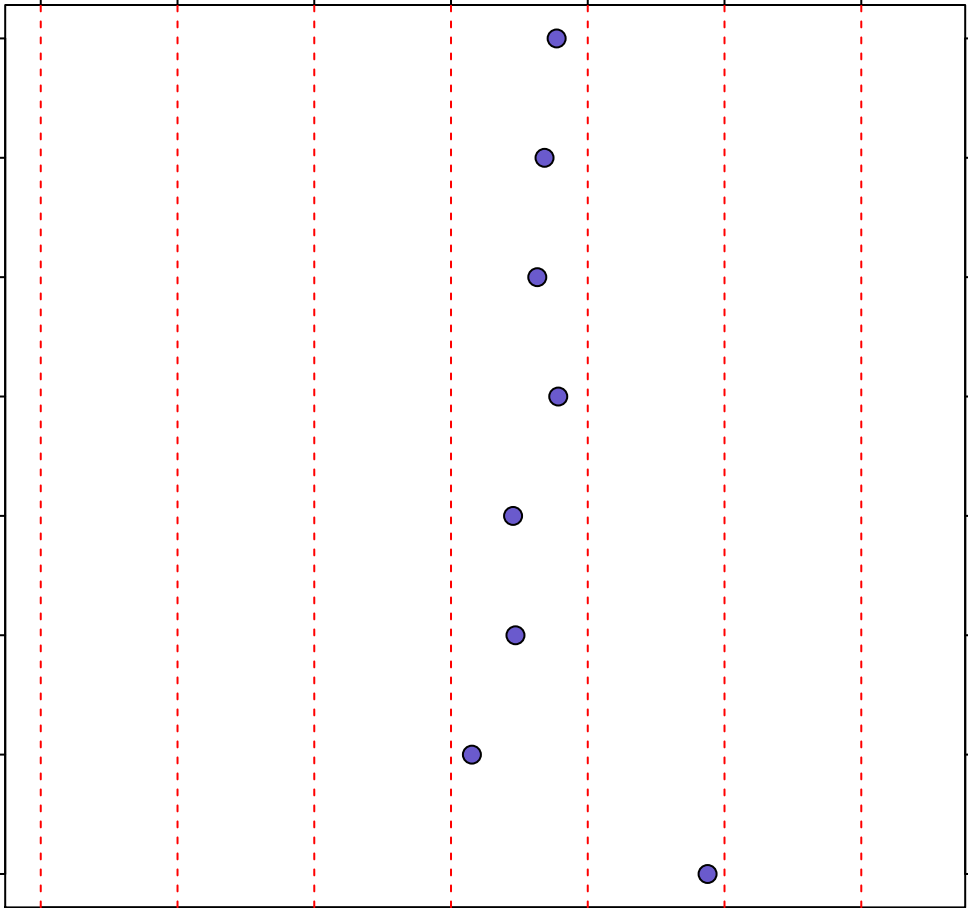

# Patient\_22 9 oclock

'phantom least similar to TG43'

D(Y, N, B, B)

D(Y, N, B, N)

D(Y, N, B, M)

D(N, N, N, N)

D(Y, N, N, N)

D(Y, N, M, M)

D(Y, M, X, X)

D(N, M, X, X)

'phantom most similar to TG43'

-10 -8 -6 -4 -2 0 2

%diff 100\*(GBBS-TG43)/TG43

GBBS(solid model applicator, body, balloon & rectal contrast, packing contrast)

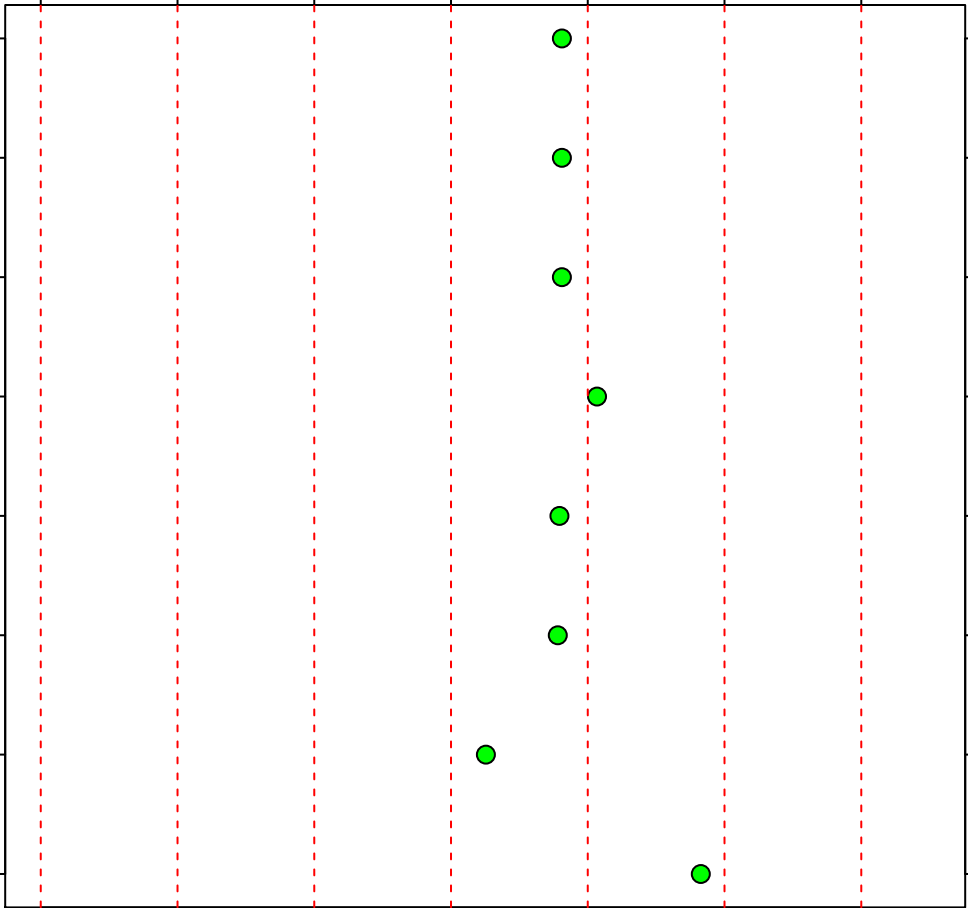

# Patient\_23 9 oclock

'phantom least similar to TG43'

D(Y, N, B, B)

D(Y, N, B, N)

D(Y, N, B, M)

D(N, N, N, N)

D(Y, N, N, N)

D(Y, N, M, M)

D(Y, M, X, X)

D(N, M, X, X)

'phantom most similar to TG43'

-10

-8

-6

-4

-2

0

2

%diff 100\*(GBBS-TG43)/TG43

GBBS(solid model applicator, body, balloon & rectal contrast, packing contrast)

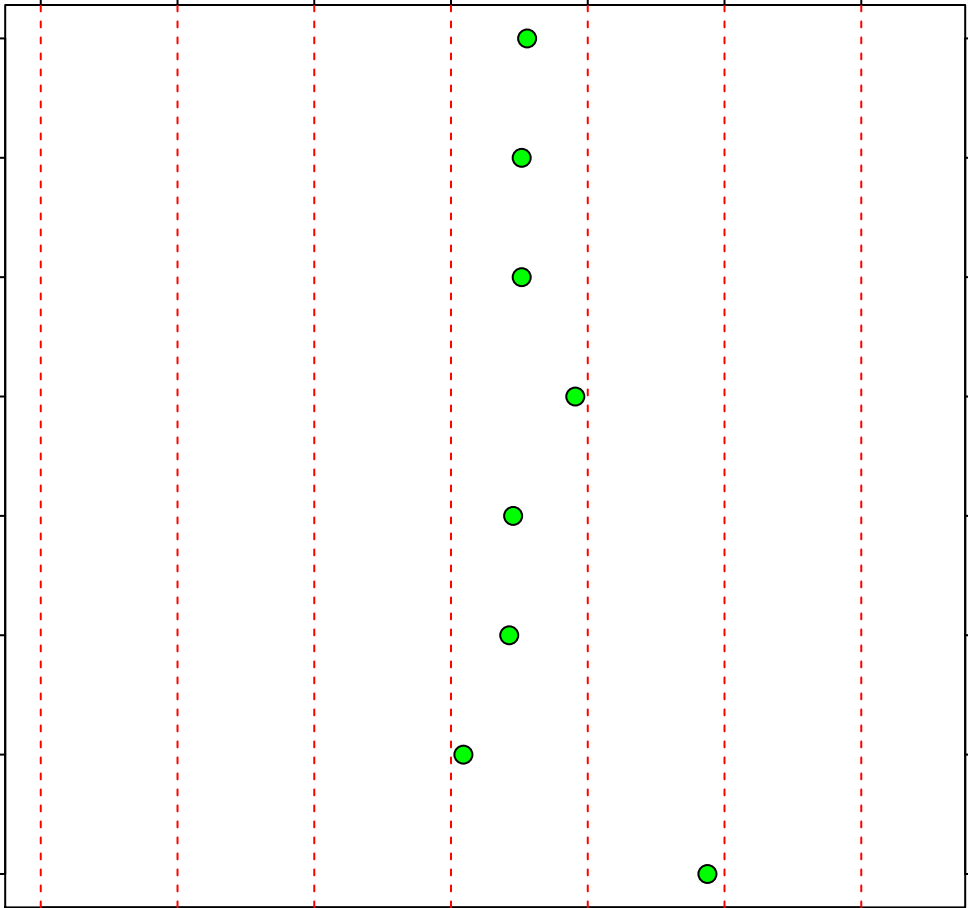

# Patient\_24 9 oclock

'phantom least similar to TG43'

D(Y, N, B, B)

D(Y, N, B, N)

D(Y, N, B, M)

D(N, N, N, N)

D(Y, N, N, N)

D(Y, N, M, M)

D(Y, M, X, X)

D(N, M, X, X)

'phantom most similar to TG43'

-10

-8

-6

-4

-2

0

2

%diff 100\*(GBBS-TG43)/TG43

GBBS(solid model applicator, body, balloon & rectal contrast, packing contrast)

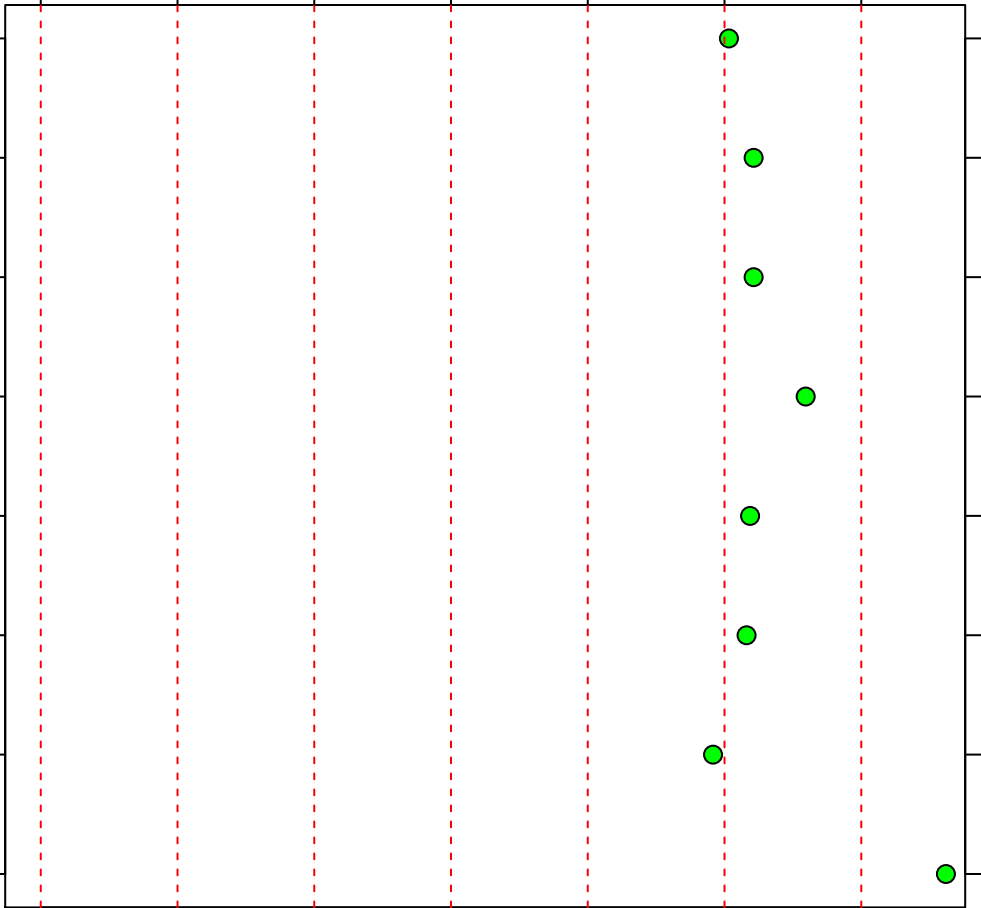

# Patient\_25 9 oclock

'phantom least similar to TG43'

D(Y, N, B, B)

D(Y, N, B, N)

D(Y, N, B, M)

D(N, N, N, N)

D(Y, N, N, N)

D(Y, N, M, M)

D(Y, M, X, X)

D(N, M, X, X)

'phantom most similar to TG43'

-10

-8

-6

-4

-2

0

2

%diff 100\*(GBBS-TG43)/TG43

GBBS(solid model applicator, body, balloon & rectal contrast, packing contrast)

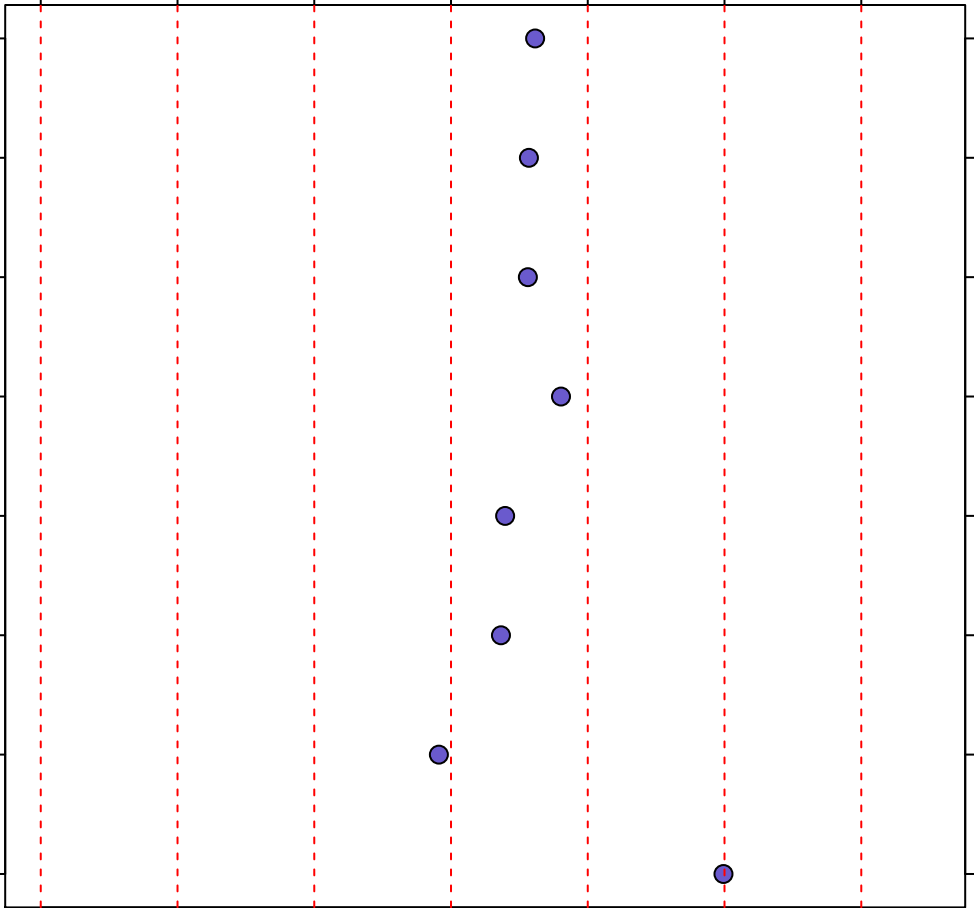



# Patient\_26 9 oclock

'phantom least similar to TG43'

D(Y, N, B, B)

D(Y, N, B, N)

D(Y, N, B, M)

D(N, N, N, N)

D(Y, N, N, N)

D(Y, N, M, M)

D(Y, M, X, X)

D(N, M, X, X)

'phantom most similar to TG43'

-10 -8 -6 -4 -2 0 2

%diff 100\*(GBBS-TG43)/TG43

GBBS(solid model applicator, body, balloon & rectal contrast, packing contrast)

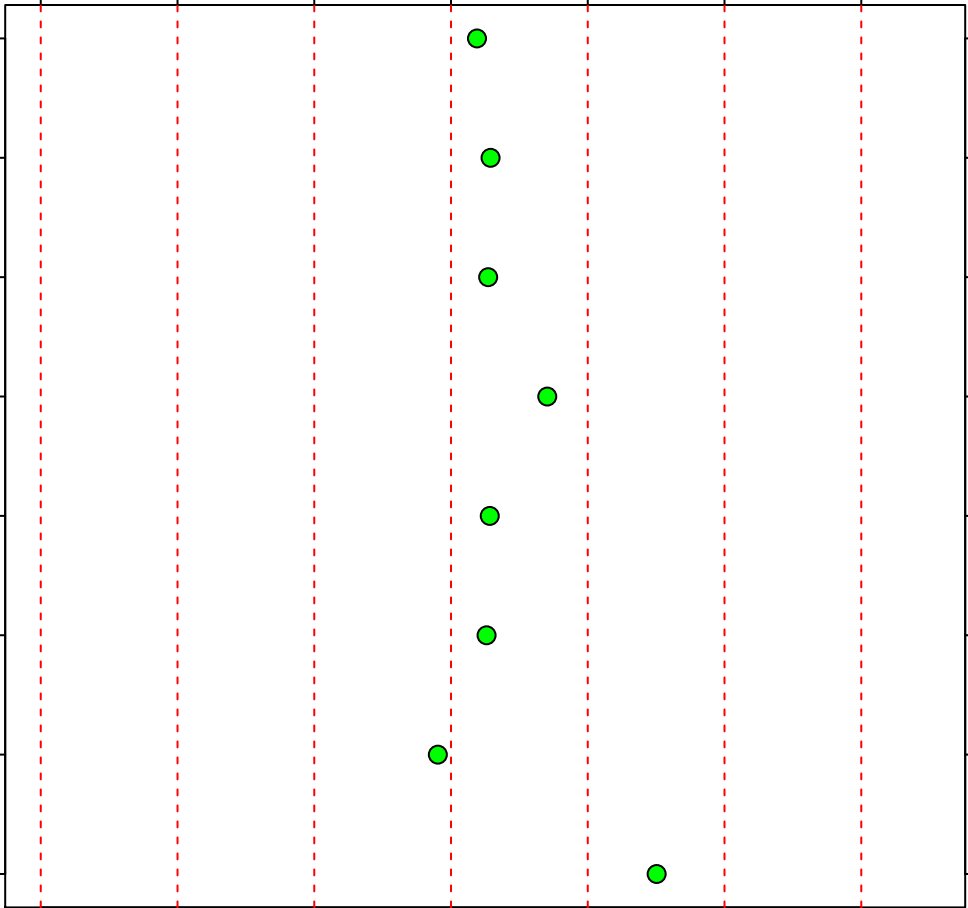

Supplement: NIHMS539658-supplement-09.pdf [file NIHMS539658-supplement-09.pdf]
