# Supplementary material
Source: PubMed Central journal article supplement (PMC3955059)
Supplement: NIHMS539658-supplement-11.pdf [file NIHMS539658-supplement-11.pdf]

## SUPPLEMENTAL FIGURES: PERCENT DIFFERENCE IMAGES

**Table 1.** Summary of different GBBS calculations.

| <b>GBBS calculation name</b> | <b>Applicator</b> | <b>Body override</b> | <b>Rectal and balloon contrast</b> | <b>Packing contrast</b> |
|------------------------------|-------------------|----------------------|------------------------------------|-------------------------|
| D(Y, N, B, B)                | CT/MR (Y)         | None (N)             | 2.25 g/cc bone (B)                 | 2.25 g/cc bone (B)      |
| D(Y, N, B, N)                | CT/MR (Y)         | None (N)             | 2.25 g/cc bone (B)                 | None (N)                |
| D(Y, N, B, M)                | CT/MR (Y)         | None (N)             | 2.25 g/cc bone (B)                 | 1 g/cc muscle (M)       |
| D(N, N, N, N)                | None (N)          | None (N)             | None (N)                           | None (N)                |
| D(Y, N, N, N)                | CT/MR (Y)         | None (N)             | None (N)                           | None (N)                |
| D(Y, N, M, M)                | CT/MR (Y)         | None (N)             | 1 g/cc muscle (M)                  | 1 g/cc muscle (M)       |
| D(Y, M, X, X)                | CT/MR (Y)         | 1 g/cc muscle (M)    | Not applicable (X)                 | Not applicable (X)      |
| D(N, M, X, X)                | None (N)          | 1 g/cc muscle (M)    | Not applicable (X)                 | Not applicable (X)      |

Four variables were used in the GBBS calculations. GBBS(solid applicator, body override, rectal and balloon override, packing override). Y = yes solid applicator was used, N = no solid applicator was used or no override was specified. B denotes that the contour was overridden to 2.25 g/cc bone. M denotes that the contour was overridden to 1g/cc muscle. X denotes that the value of the contour is not applicable since larger contour is overriding its value.

For patients not having contrast materials in the sigmoid and rectum, the entire sigmoid and rectum contour were overridden. This is indicated on the figure for each patient.

The calculations have been ordered from 'least similar to TG43 phantom' at the top to 'most similar to TG43 phantom' at the bottom. This ordering is based on material found in the phantom. D(N,M,X,X) is closest to TG43 since it is entirely 1g/cc muscle. D(Y,M,X,X) is next closest to TG43 because it is all 1g/cc muscle and applicator.

Patient\_01 D(Y,N,B,B) %difference from TG43

left colpostat sagittal

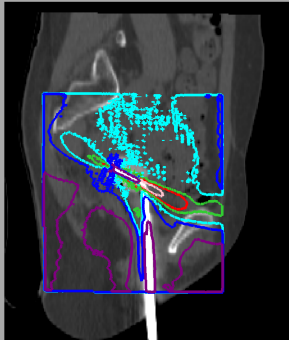

right colpostat sagittal

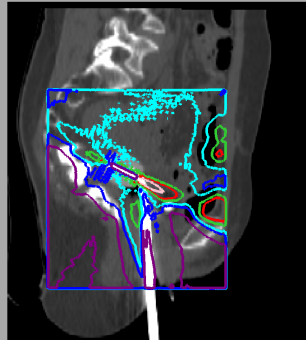

tandem sagittal

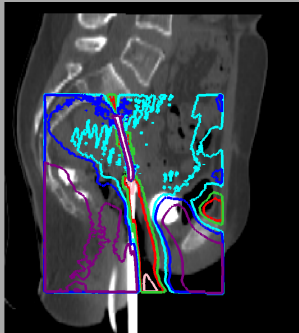

colpostats transverse

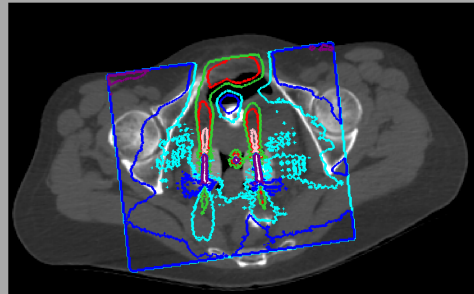

%diff from TG43

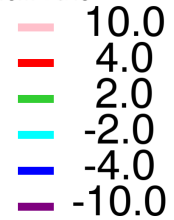

phantom least similar to TG43

-->D(Y,N,B,B)<--

D(Y,N,B,N)

D(Y,N,B,M)

D(N,N,N,N)

D(Y,N,N,N)

D(Y,N,M,M)

D(Y,M,X,X)

D(N,M,X,X)

phantom most similar to TG43

GBBS(solid model applicator, body, balloon and rectal contrast, packing contrast)

Patient\_01 D(Y,N,B,N) %difference from TG43

left colpostat sagittal

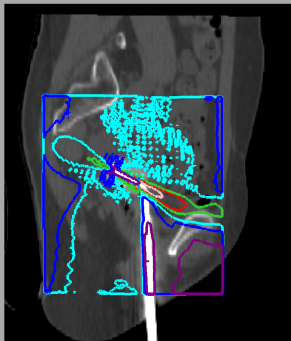

right colpostat sagittal

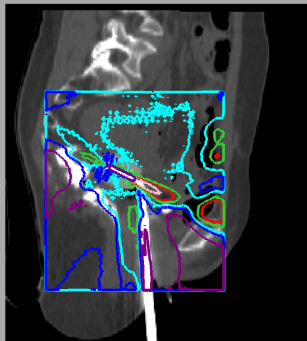

tandem sagittal

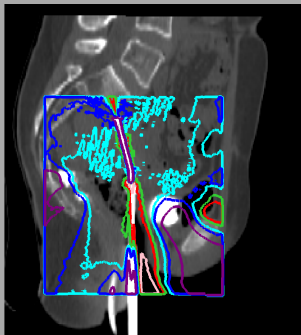

colpostats transverse

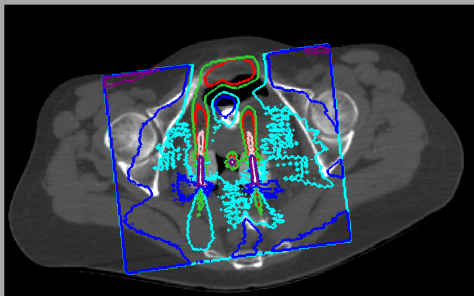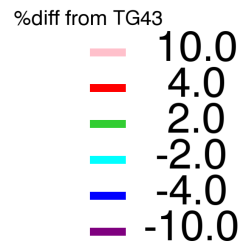

phantom least similar to TG43

D(Y,N,B,B)

-->D(Y,N,B,N)<--

D(Y,N,B,M)

D(N,N,N,N)

D(Y,N,N,N)

D(Y,N,M,M)

D(Y,M,X,X)

D(N,M,X,X)

phantom most similar to TG43

GBBS(solid model applicator, body, balloon and rectal contrast, packing contrast)

Patient\_01 D(Y,N,B,M) %difference from TG43

left colpostat sagittal

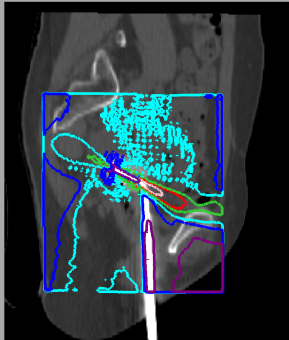

right colpostat sagittal

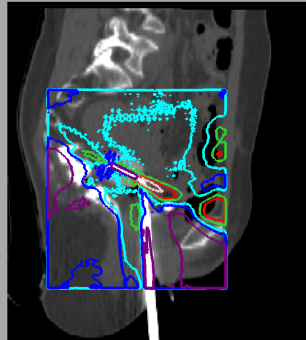

tandem sagittal

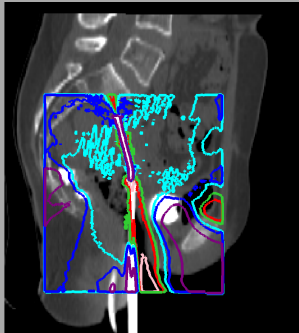

colpostats transverse

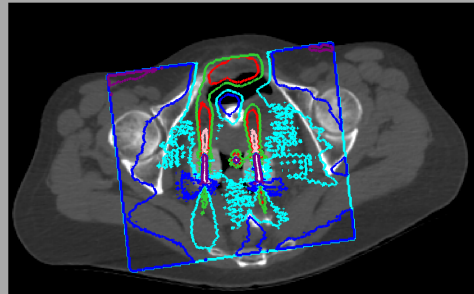

%diff from TG43

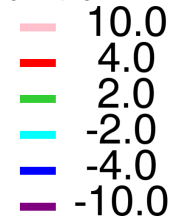

phantom least similar to TG43

D(Y,N,B,B)

D(Y,N,B,N)

-->D(Y,N,B,M)<--

D(N,N,N,N)

D(Y,N,N,N)

D(Y,N,M,M)

D(Y,M,X,X)

D(N,M,X,X)

phantom most similar to TG43

GBBS(solid model applicator, body, balloon and rectal contrast, packing contrast)

Patient\_01 D(N,N,N,N) %difference from TG43

left colpostat sagittal

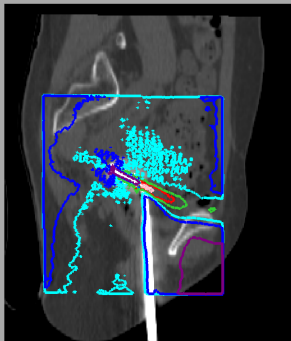

right colpostat sagittal

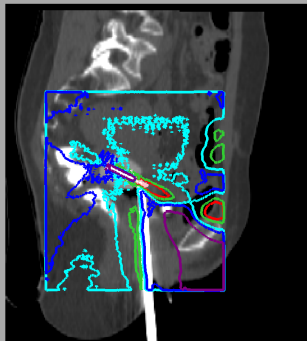

tandem sagittal

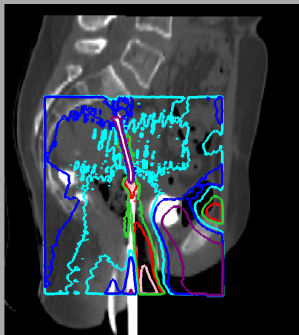

colpostats transverse

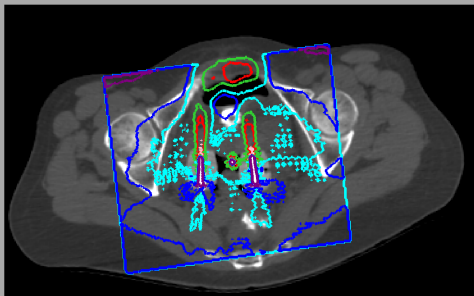

%diff from TG43

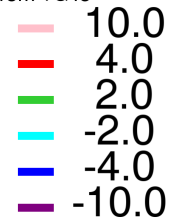

phantom least similar to TG43

D(Y,N,B,B)

D(Y,N,B,N)

D(Y,N,B,M)

-->D(N,N,N,N)<--

D(Y,N,N,N)

D(Y,N,M,M)

D(Y,M,X,X)

D(N,M,X,X)

phantom most similar to TG43

GBBS(solid model applicator, body, balloon and rectal contrast, packing contrast)

Patient\_01 D(Y,N,N,N) %difference from TG43

left colpostat sagittal

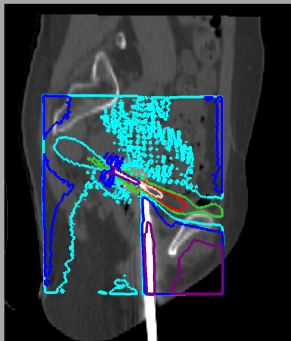

right colpostat sagittal

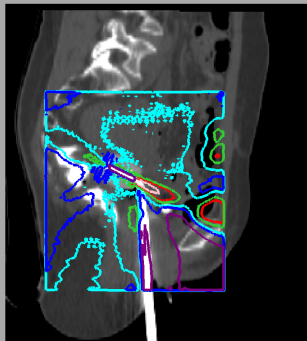

tandem sagittal

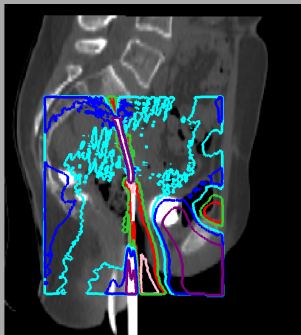

colpostats transverse

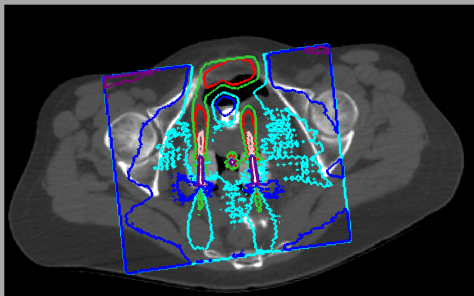

%diff from TG43

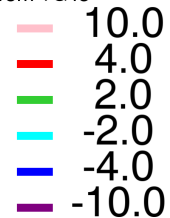

phantom least similar to TG43

D(Y,N,B,B)

D(Y,N,B,N)

D(Y,N,B,M)

D(N,N,N,N)

-->D(Y,N,N,N)<--

D(Y,N,M,M)

D(Y,M,X,X)

D(N,M,X,X)

phantom most similar to TG43

GBBS(solid model applicator, body, balloon and rectal contrast, packing contrast)

Patient\_01 D(Y,N,M,M) %difference from TG43

left colpostat sagittal

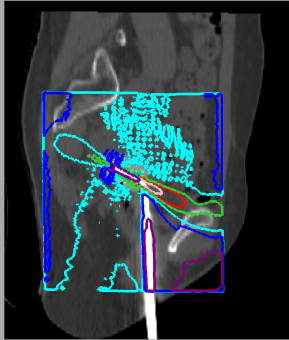

right colpostat sagittal

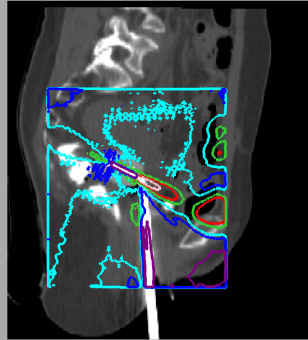

tandem sagittal

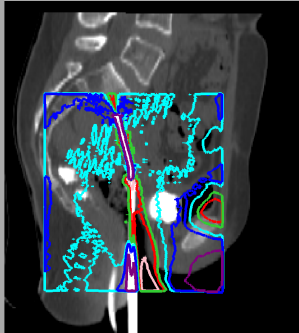

colpostats transverse

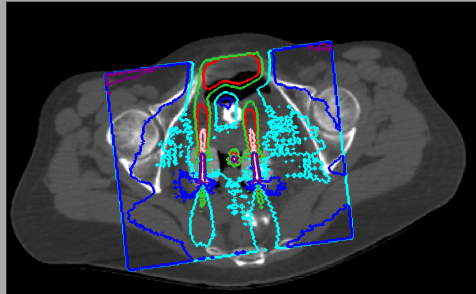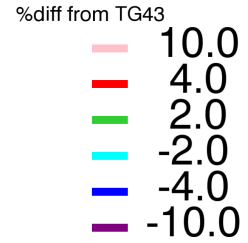

phantom least similar to TG43

D(Y,N,B,B)

D(Y,N,B,N)

D(Y,N,B,M)

D(N,N,N,N)

D(Y,N,N,N)

-->D(Y,N,M,M)<--

D(Y,M,X,X)

D(N,M,X,X)

phantom most similar to TG43

GBBS(solid model applicator, body, balloon and rectal contrast, packing contrast)

Patient\_01 D(Y,M,X,X) %difference from TG43

left colpostat sagittal

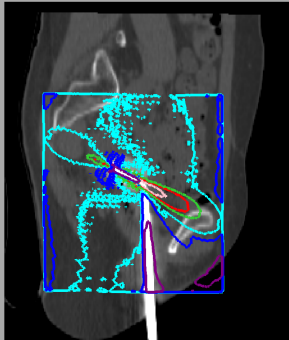

right colpostat sagittal

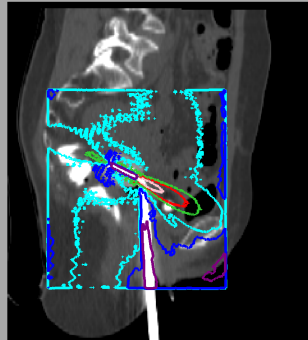

tandem sagittal

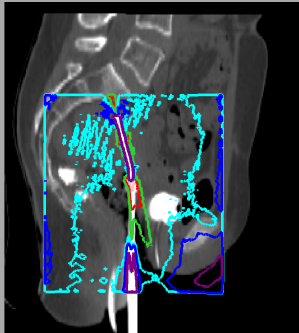

colpostats transverse

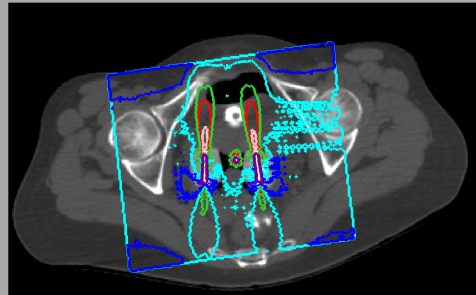

%diff from TG43

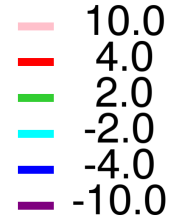

phantom least similar to TG43

D(Y,N,B,B)

D(Y,N,B,N)

D(Y,N,B,M)

D(N,N,N,N)

D(Y,N,N,N)

D(Y,N,M,M)

-->D(Y,M,X,X)<--

D(N,M,X,X)

phantom most similar to TG43

GBBS(solid model applicator, body, balloon and rectal contrast, packing contrast)



Patient\_01 D(N,M,X,X) %difference from TG43

left colpostat sagittal

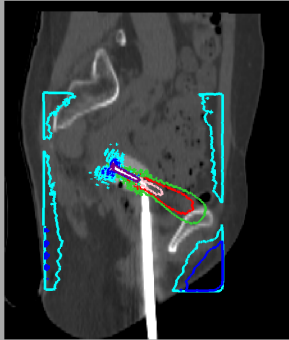

right colpostat sagittal

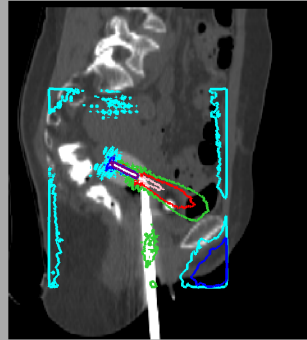

tandem sagittal

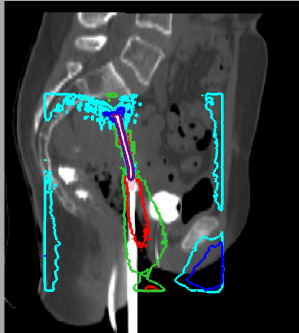

colpostats transverse

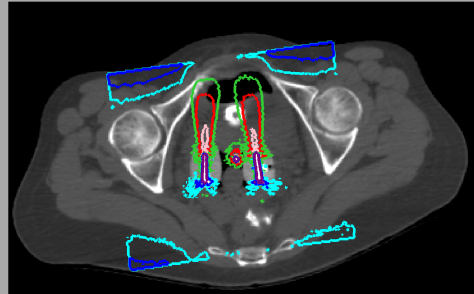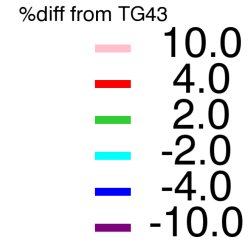

phantom least similar to TG43

D(Y,N,B,B)

D(Y,N,B,N)

D(Y,N,B,M)

D(N,N,N,N)

D(Y,N,N,N)

D(Y,N,M,M)

D(Y,M,X,X)

-->D(N,M,X,X)<--

phantom most similar to TG43

GBBS(solid model applicator, body, balloon and rectal contrast, packing contrast)

Patient\_02 D(Y,N,B,B) %difference from TG43

left colpostat sagittal

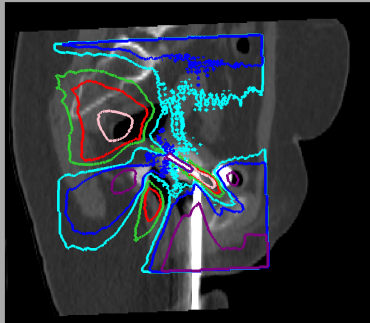

right colpostat sagittal

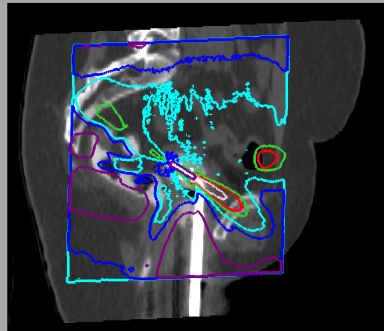

tandem sagittal

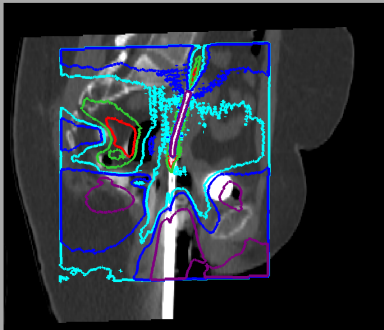

colpostats transverse

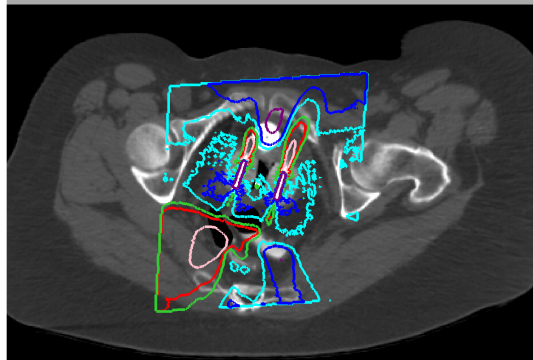

%diff from TG43



phantom least similar to TG43

-->D(Y,N,B,B)<--

D(Y,N,B,N)

D(Y,N,B,M)

D(N,N,N,N)

D(Y,N,N,N)

D(Y,N,M,M)

D(Y,M,X,X)

D(N,M,X,X)

phantom most similar to TG43

GBBS(solid model applicator, body, balloon and rectal contrast, packing contrast)

Patient\_02 D(Y,N,B,N) %difference from TG43

left colpostat sagittal

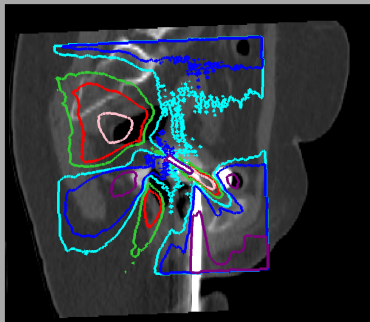

right colpostat sagittal

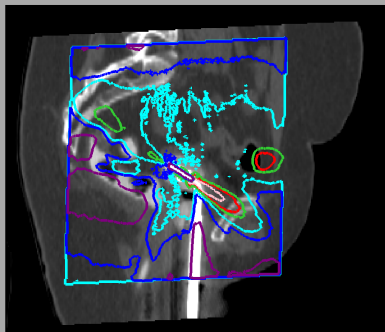

tandem sagittal

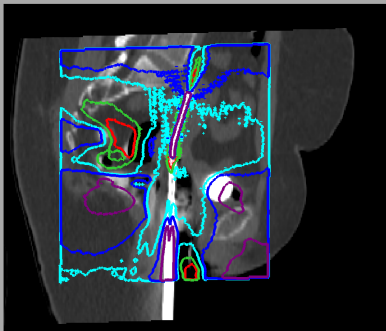

colpostats transverse

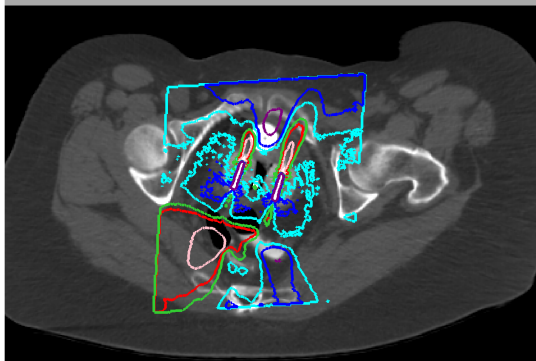

%diff from TG43



phantom least similar to TG43

D(Y,N,B,B)

-->D(Y,N,B,N)<--

D(Y,N,B,M)

D(N,N,N,N)

D(Y,N,N,N)

D(Y,N,M,M)

D(Y,M,X,X)

D(N,M,X,X)

phantom most similar to TG43

GBBS(solid model applicator, body, balloon and rectal contrast, packing contrast)

Patient\_02 D(Y,N,B,M) %difference from TG43

left colpostat sagittal

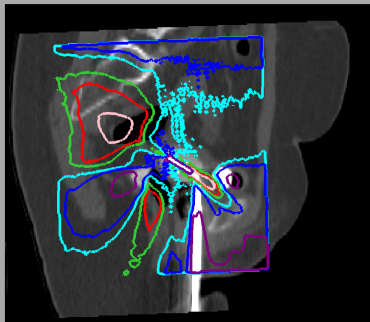

right colpostat sagittal

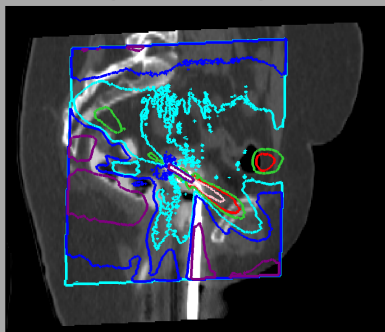

tandem sagittal

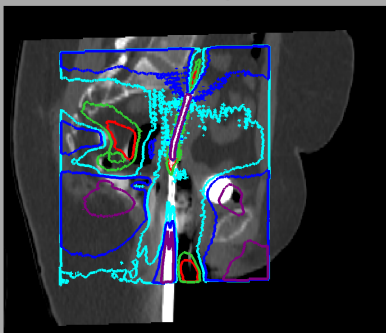

colpostats transverse

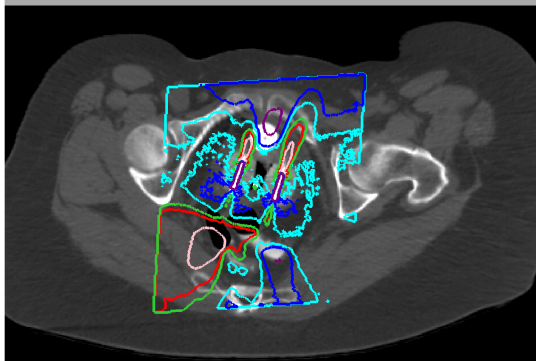

%diff from TG43



phantom least similar to TG43

D(Y,N,B,B)

D(Y,N,B,N)

-->D(Y,N,B,M)<--

D(N,N,N,N)

D(Y,N,N,N)

D(Y,N,M,M)

D(Y,M,X,X)

D(N,M,X,X)

phantom most similar to TG43

GBBS(solid model applicator, body, balloon and rectal contrast, packing contrast)

Patient\_02 D(N,N,N,N) %difference from TG43

left colpostat sagittal

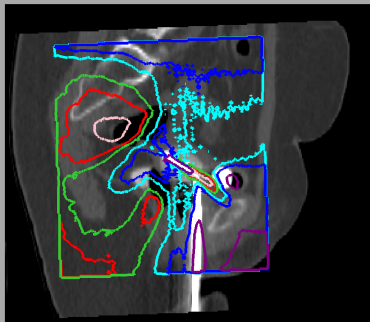

right colpostat sagittal

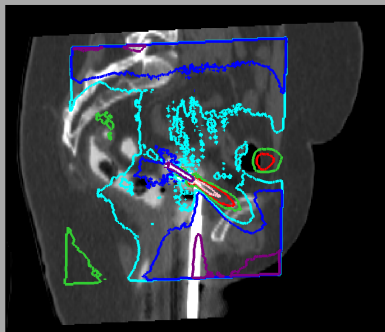

tandem sagittal

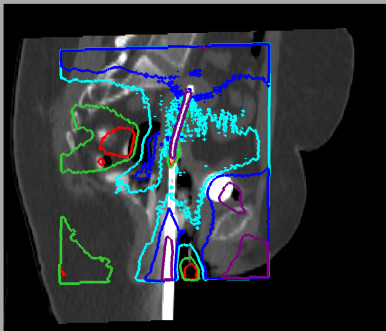

colpostats transverse

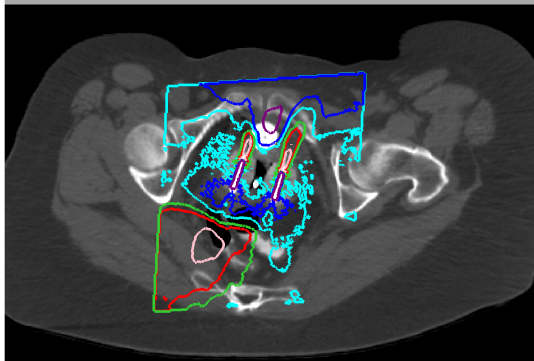

phantom least similar to TG43

D(Y,N,B,B)

D(Y,N,B,N)

D(Y,N,B,M)

-->D(N,N,N,N)<--

D(Y,N,N,N)

D(Y,N,M,M)

D(Y,M,X,X)

D(N,M,X,X)

phantom most similar to TG43

GBBS(solid model applicator, body, balloon and rectal contrast, packing contrast)

Patient\_02 D(Y,N,N,N) %difference from TG43

left colpostat sagittal

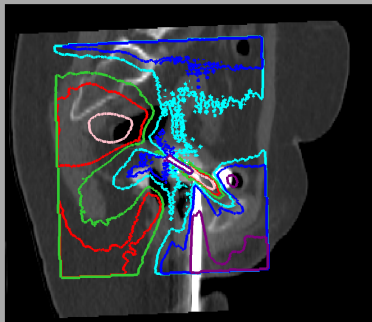

right colpostat sagittal

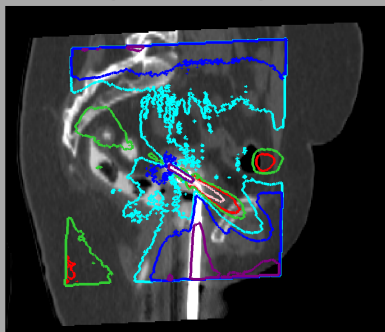

tandem sagittal

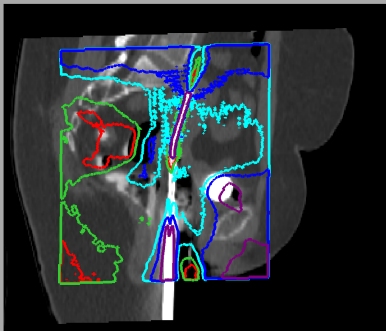

colpostats transverse

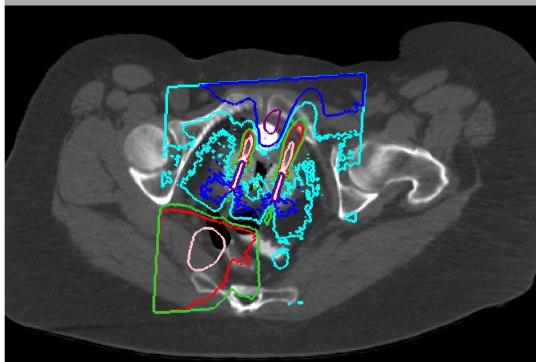

%diff from TG43



phantom least similar to TG43

D(Y,N,B,B)

D(Y,N,B,N)

D(Y,N,B,M)

D(N,N,N,N)

-->D(Y,N,N,N)<--

D(Y,N,M,M)

D(Y,M,X,X)

D(N,M,X,X)

phantom most similar to TG43

GBBS(solid model applicator, body, balloon and rectal contrast, packing contrast)

Patient\_02 D(Y,N,M,M) %difference from TG43

left colpostat sagittal

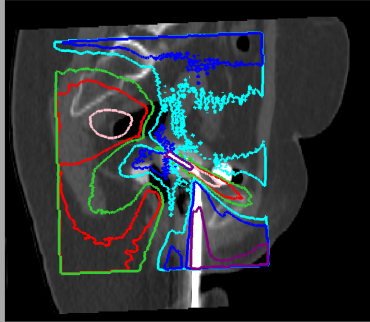

right colpostat sagittal

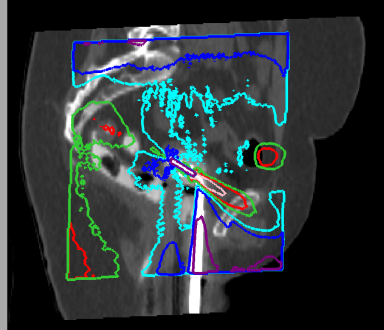

tandem sagittal

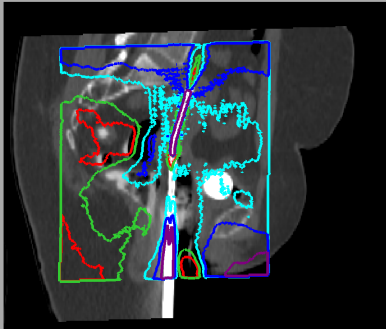

colpostats transverse

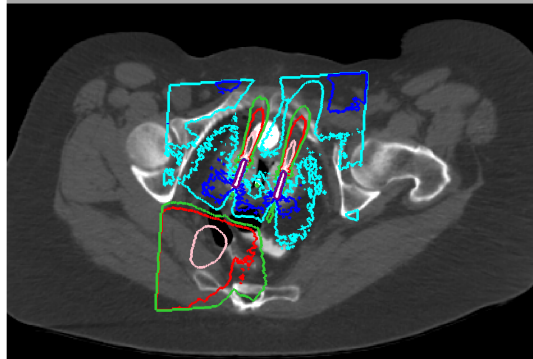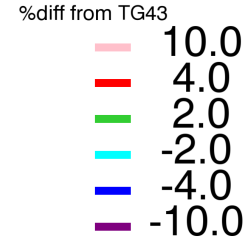

phantom least similar to TG43

D(Y,N,B,B)

D(Y,N,B,N)

D(Y,N,B,M)

D(N,N,N,N)

D(Y,N,N,N)

-->D(Y,N,M,M)<--

D(Y,M,X,X)

D(N,M,X,X)

phantom most similar to TG43

GBBS(solid model applicator, body, balloon and rectal contrast, packing contrast)

Patient\_02 D(Y,M,X,X) %difference from TG43

left colpostat sagittal

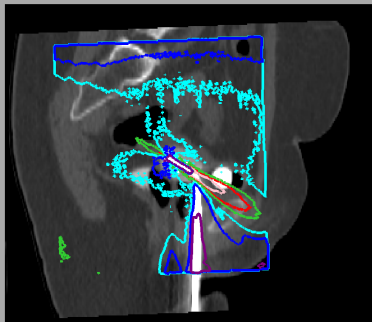

right colpostat sagittal

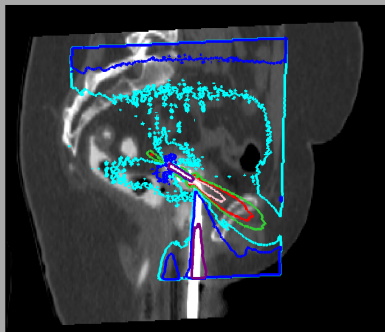

tandem sagittal

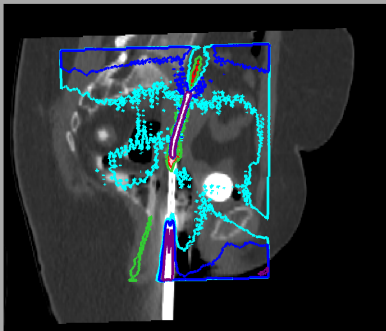

colpostats transverse

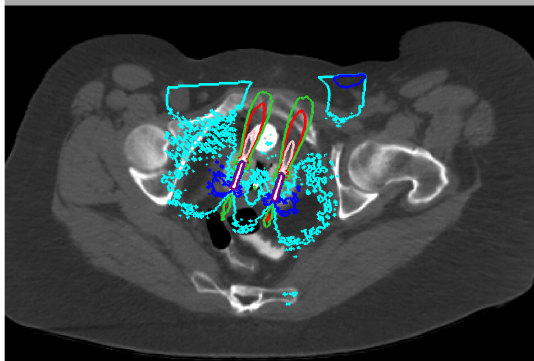

%diff from TG43



phantom least similar to TG43

D(Y,N,B,B)

D(Y,N,B,N)

D(Y,N,B,M)

D(N,N,N,N)

D(Y,N,N,N)

D(Y,N,M,M)

-->D(Y,M,X,X)<--

D(N,M,X,X)

phantom most similar to TG43

GBBS(solid model applicator, body, balloon and rectal contrast, packing contrast)



Patient\_02 D(N,M,X,X) %difference from TG43

left colpostat sagittal

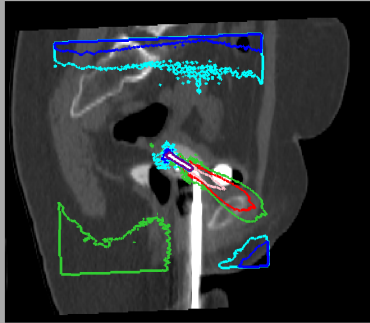

right colpostat sagittal

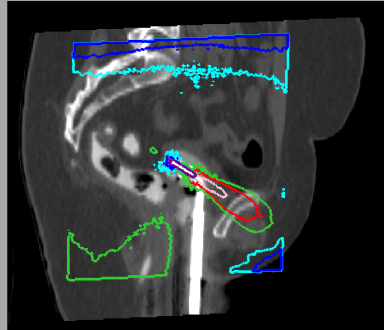

tandem sagittal

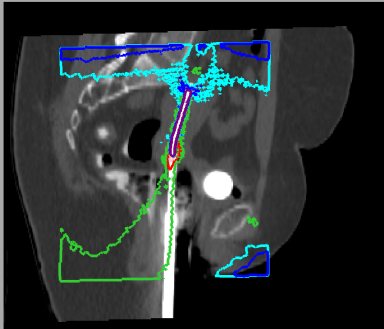

colpostats transverse

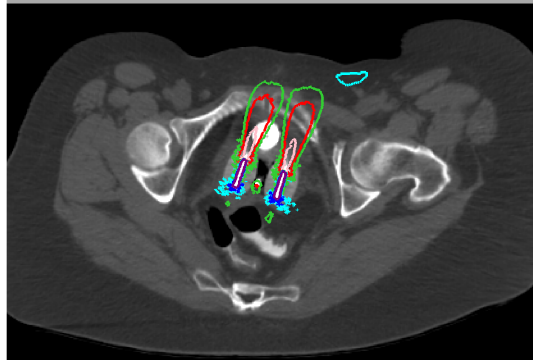

phantom least similar to TG43

D(Y,N,B,B)

D(Y,N,B,N)

D(Y,N,B,M)

D(N,N,N,N)

D(Y,N,N,N)

D(Y,N,M,M)

D(Y,M,X,X)

-->D(N,M,X,X)<--

phantom most similar to TG43

GBBS(solid model applicator, body, balloon and rectal contrast, packing contrast)

Patient\_03 D(Y,N,B,B) %difference from TG43

left coronal sagittal

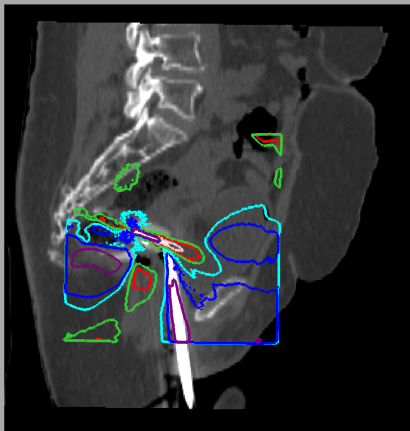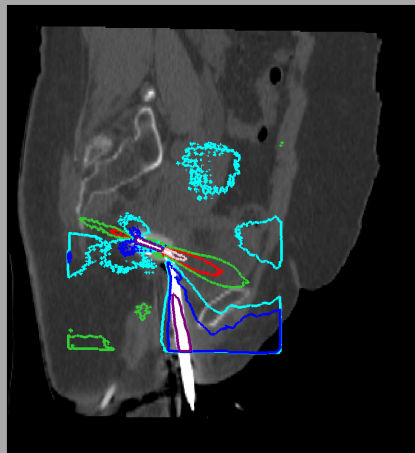

tandem sagittal

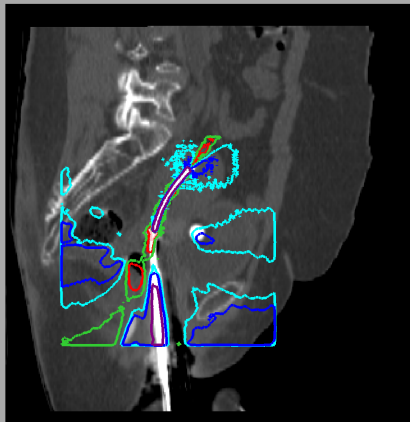

colpostats transverse

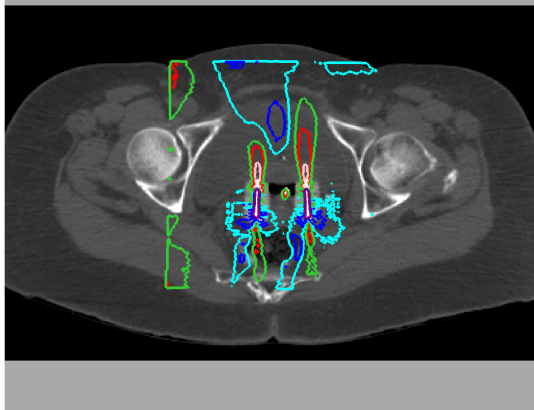

%diff from TG43



phantom least similar to TG43

-->D(Y,N,B,B)<--

D(Y,N,B,N)

D(Y,N,B,M)

D(N,N,N,N)

D(Y,N,N,N)

D(Y,N,M,M)

D(Y,M,X,X)

D(N,M,X,X)

phantom most similar to TG43

GBBS(solid model applicator, body, balloon and rectal contrast, packing contrast)

Patient\_03 D(Y,N,B,N) %difference from TG43

left colpostats sagittal

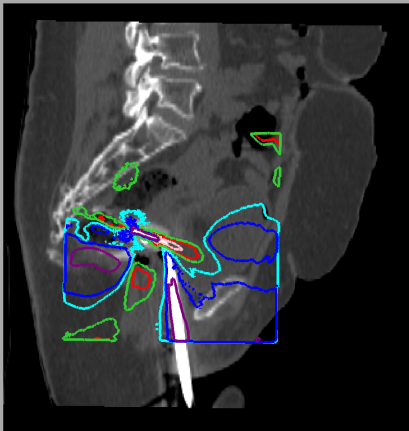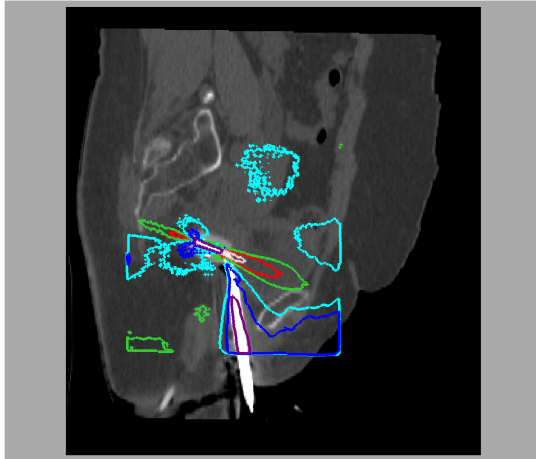

tandem sagittal

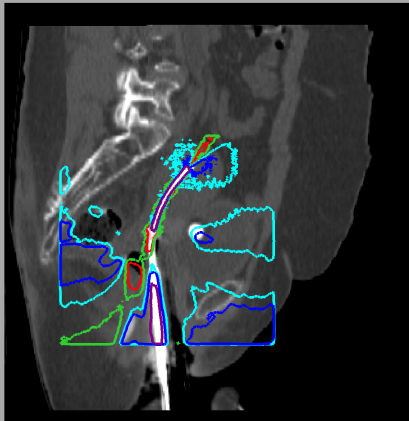

colpostats transverse

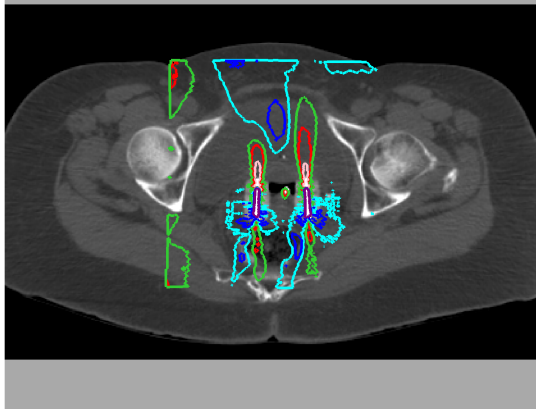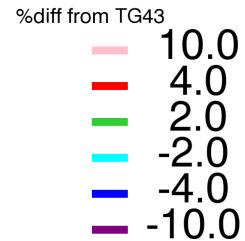

phantom least similar to TG43

D(Y,N,B,B)

-->D(Y,N,B,N)<--

D(Y,N,B,M)

D(N,N,N,N)

D(Y,N,N,N)

D(Y,N,M,M)

D(Y,M,X,X)

D(N,M,X,X)

phantom most similar to TG43

GBBS(solid model applicator, body, balloon and rectal contrast, packing contrast)

Patient\_03 D(Y,N,B,M) %difference from TG43

left coronal sagittal

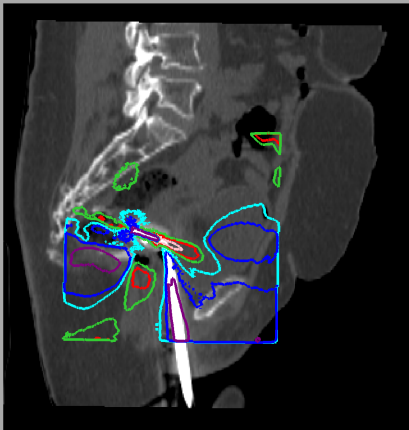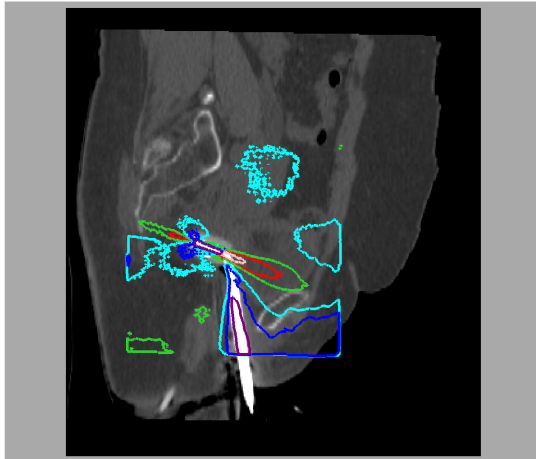

tandem sagittal

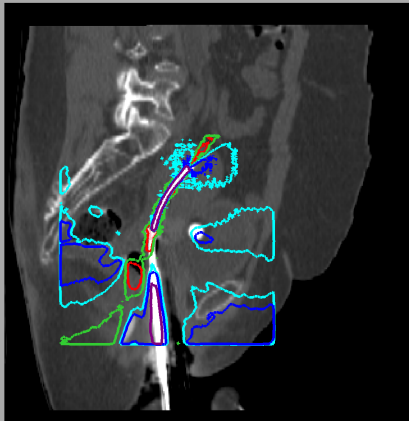

colpostats transverse

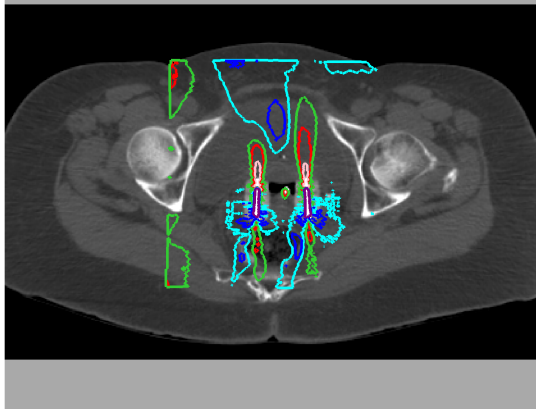

%diff from TG43



phantom least similar to TG43

D(Y,N,B,B)

D(Y,N,B,N)

-->D(Y,N,B,M)<--

D(N,N,N,N)

D(Y,N,N,N)

D(Y,N,M,M)

D(Y,M,X,X)

D(N,M,X,X)

phantom most similar to TG43

GBBS(solid model applicator, body, balloon and rectal contrast, packing contrast)

Patient\_03 D(N,N,N,N) %difference from TG43

left colpostats sagittal

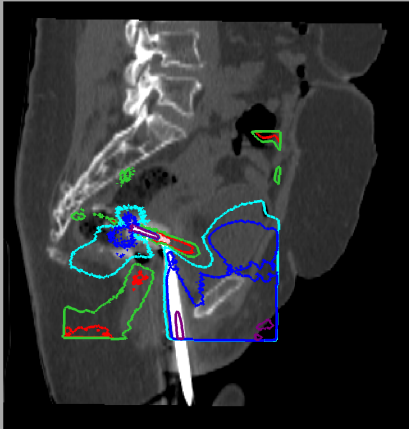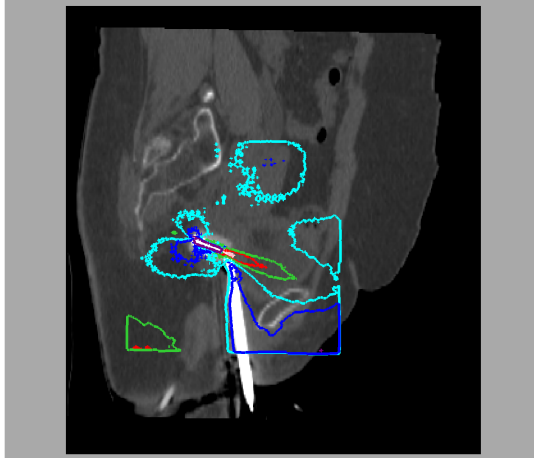

tandem sagittal

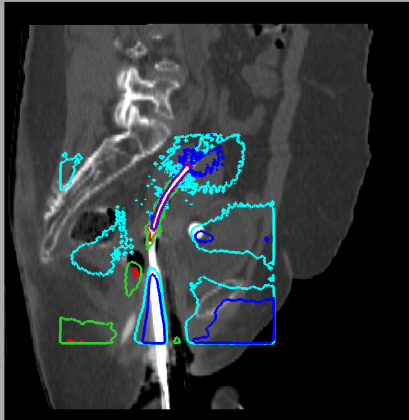

colpostats transverse

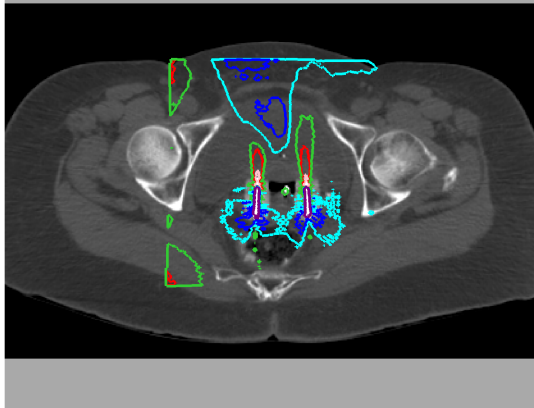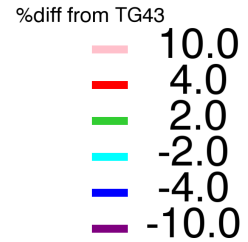

phantom least similar to TG43

D(Y,N,B,B)

D(Y,N,B,N)

D(Y,N,B,M)

-->D(N,N,N,N)<--

D(Y,N,N,N)

D(Y,N,M,M)

D(Y,M,X,X)

D(N,M,X,X)

phantom most similar to TG43

GBBS(solid model applicator, body, balloon and rectal contrast, packing contrast)

Patient\_03 D(Y,N,N,N) %difference from TG43

left coronal sagittal

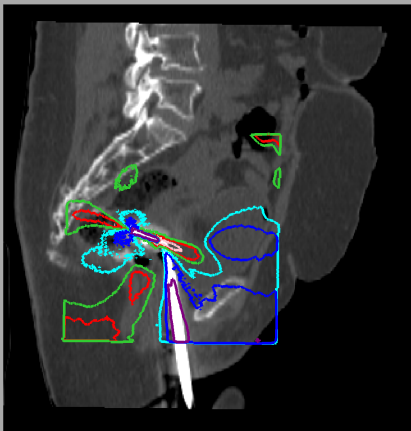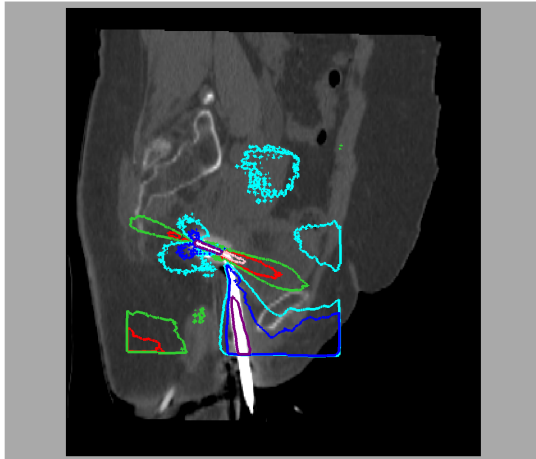

tandem sagittal

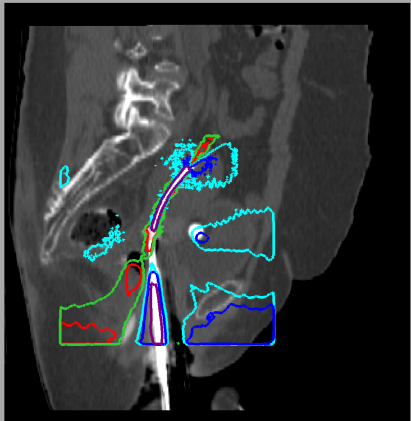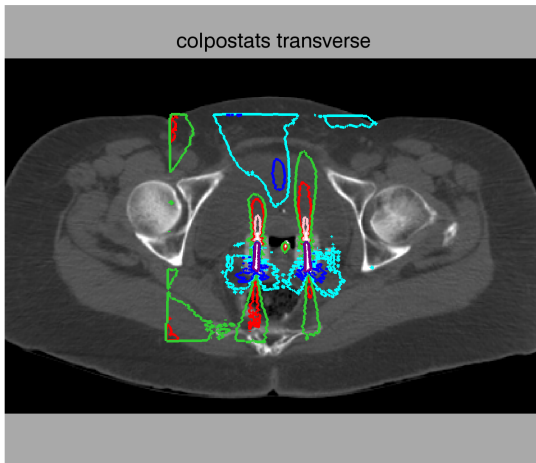

%diff from TG43



phantom least similar to TG43

D(Y,N,B,B)

D(Y,N,B,N)

D(Y,N,B,M)

D(N,N,N,N)

-->D(Y,N,N,N)<--

D(Y,N,M,M)

D(Y,M,X,X)

D(N,M,X,X)

phantom most similar to TG43

GBBS(solid model applicator, body, balloon and rectal contrast, packing contrast)

Patient\_03 D(Y,N,M,M) %difference from TG43

left colpostats sagittal

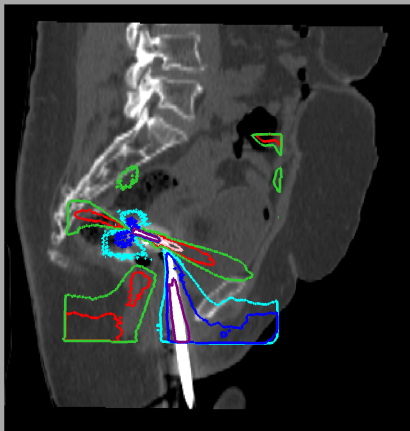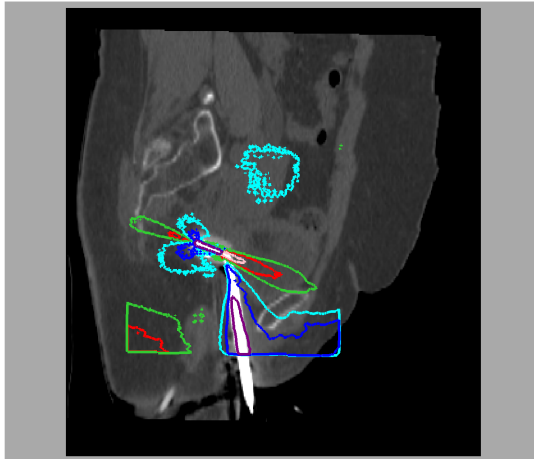

tandem sagittal

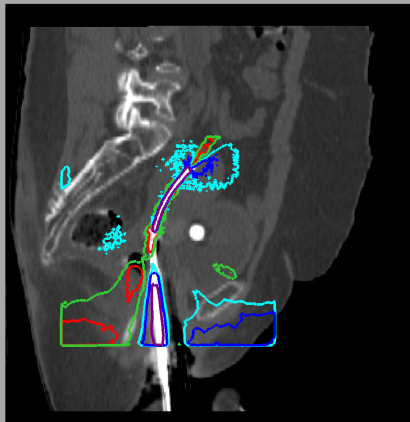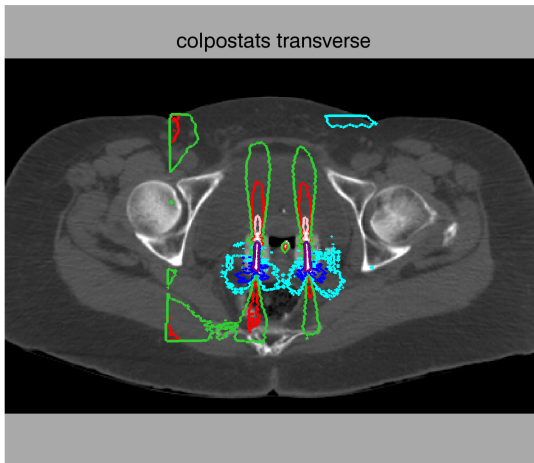

%diff from TG43



phantom least similar to TG43

D(Y,N,B,B)

D(Y,N,B,N)

D(Y,N,B,M)

D(N,N,N,N)

D(Y,N,N,N)

-->D(Y,N,M,M)<--

D(Y,M,X,X)

D(N,M,X,X)

phantom most similar to TG43

GBBS(solid model applicator, body, balloon and rectal contrast, packing contrast)

Patient\_03 D(Y,M,X,X) %difference from TG43

left colpostats sagittal

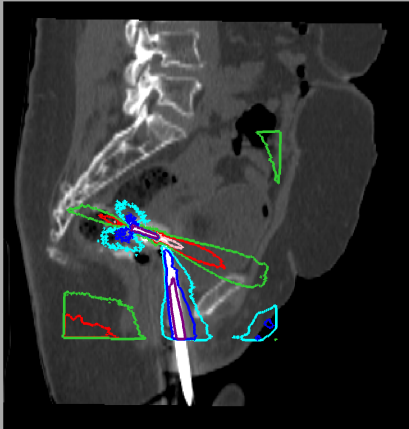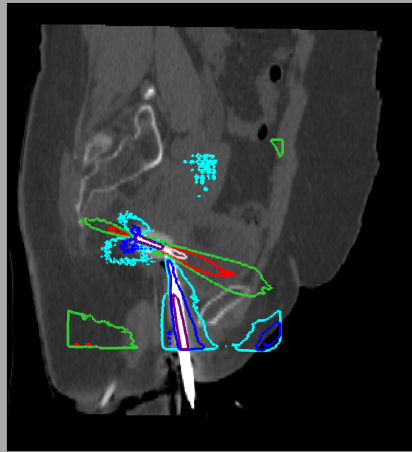

tandem sagittal

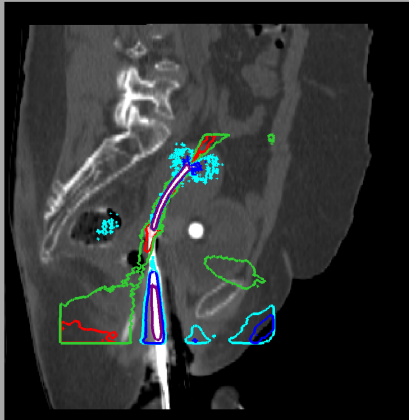

colpostats transverse

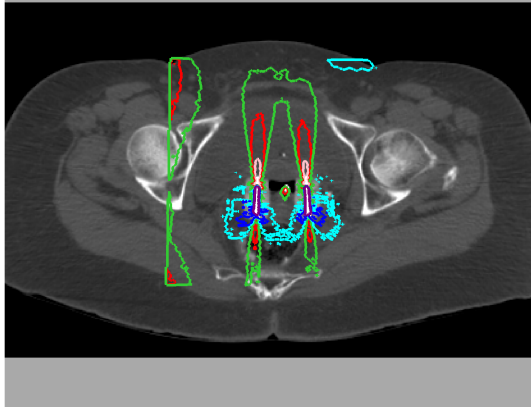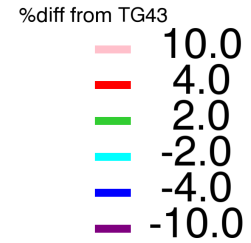

phantom least similar to TG43

D(Y,N,B,B)

D(Y,N,B,N)

D(Y,N,B,M)

D(N,N,N,N)

D(Y,N,N,N)

D(Y,N,M,M)

-->D(Y,M,X,X)<--

D(N,M,X,X)

phantom most similar to TG43

GBBS(solid model applicator, body, balloon and rectal contrast, packing contrast)



Patient\_03 D(N,M,X,X) %difference from TG43

left coronal sagittal

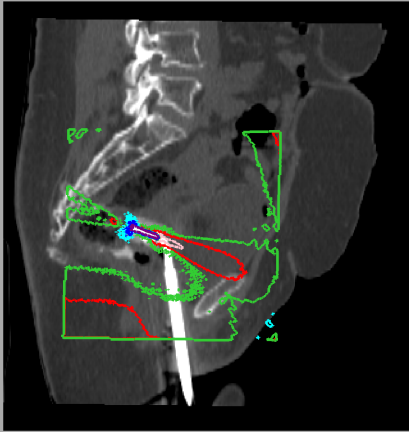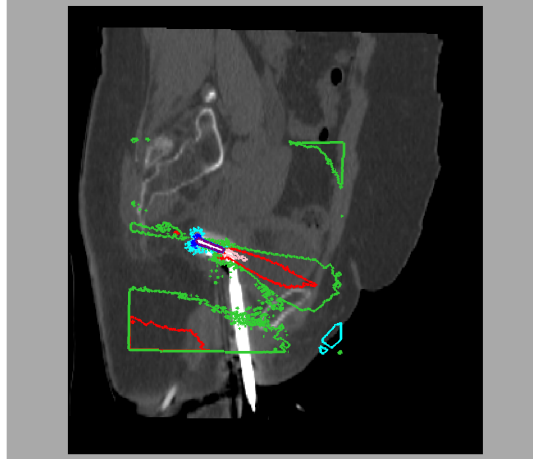

tandem sagittal

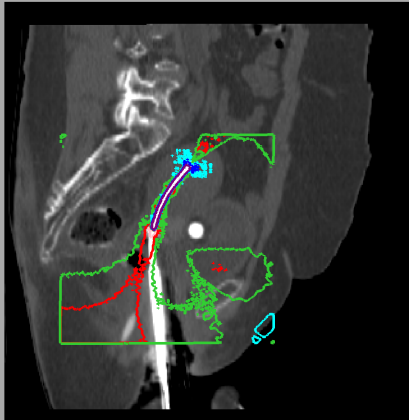

colpostats transverse

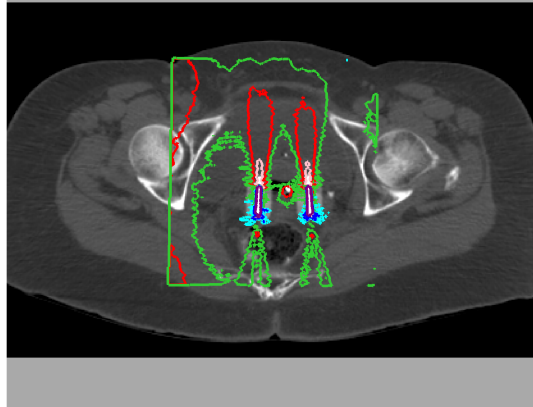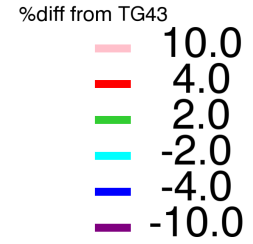

phantom least similar to TG43

D(Y,N,B,B)

D(Y,N,B,N)

D(Y,N,B,M)

D(N,N,N,N)

D(Y,N,N,N)

D(Y,N,M,M)

D(Y,M,X,X)

-->D(N,M,X,X)<--

phantom most similar to TG43

GBBS(solid model applicator, body, balloon and rectal contrast, packing contrast)

Patient\_04 D(Y,N,B,B) %difference from TG43

\*\*entire rectum overridden\*\*

left colpostat sagittal

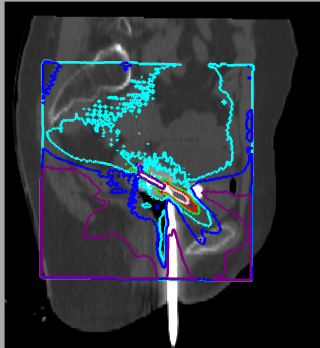

right colpostat sagittal

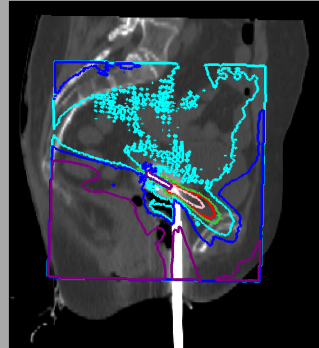

tandem sagittal

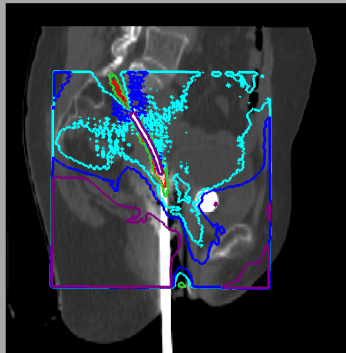

colpostats transverse

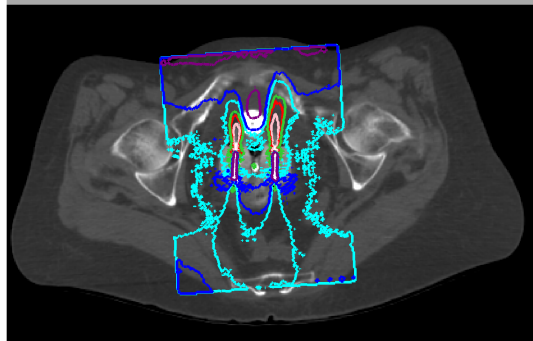

phantom least similar to TG43

-->D(Y,N,B,B)<--

D(Y,N,B,N)

D(Y,N,B,M)

D(N,N,N,N)

D(Y,N,N,N)

D(Y,N,M,M)

D(Y,M,X,X)

D(N,M,X,X)

phantom most similar to TG43

GBBS(solid model applicator, body, balloon and rectal contrast, packing contrast)

Patient\_04 D(Y,N,B,N) %difference from TG43

\*\*entire rectum overridden\*\*

left colpostat sagittal

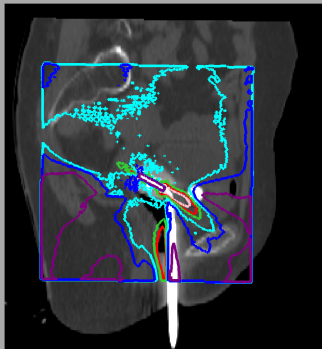

right colpostat sagittal

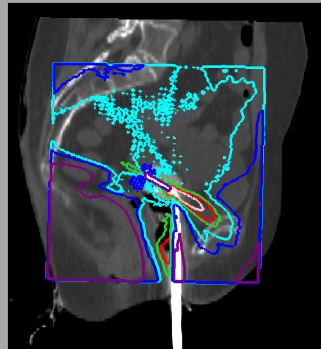

tandem sagittal

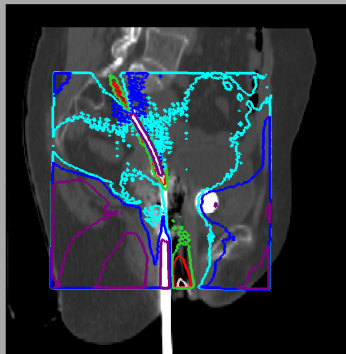

colpostats transverse

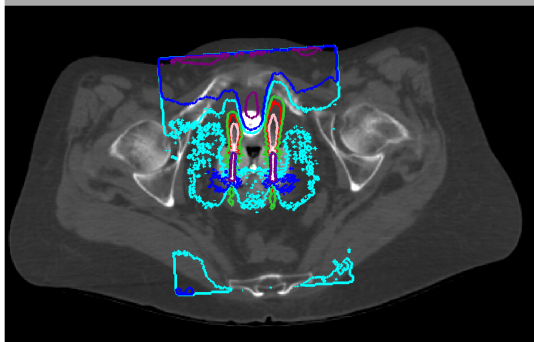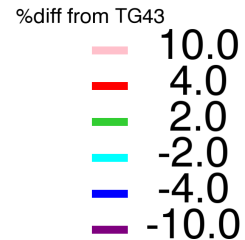

phantom least similar to TG43

D(Y,N,B,B)

-->D(Y,N,B,N)<--

D(Y,N,B,M)

D(N,N,N,N)

D(Y,N,N,N)

D(Y,N,M,M)

D(Y,M,X,X)

D(N,M,X,X)

phantom most similar to TG43

GBBS(solid model applicator, body, balloon and rectal contrast, packing contrast)

Patient\_04 D(Y,N,B,M) %difference from TG43

\*\*entire rectum overridden\*\*

left colpostat sagittal

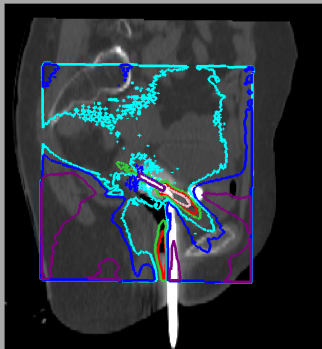

right colpostat sagittal

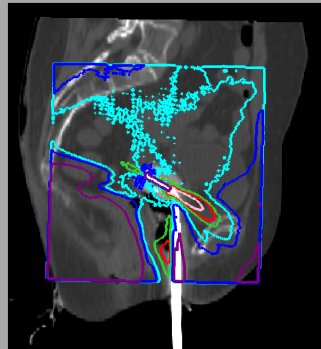

tandem sagittal

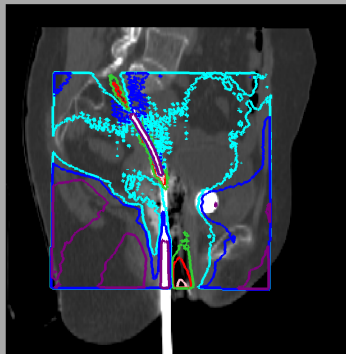

colpostats transverse

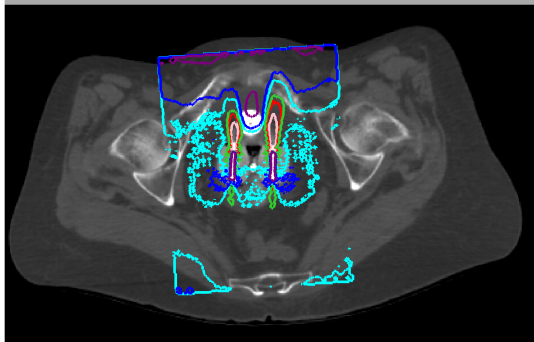

%diff from TG43



phantom least similar to TG43

D(Y,N,B,B)

D(Y,N,B,N)

-->D(Y,N,B,M)<--

D(N,N,N,N)

D(Y,N,N,N)

D(Y,N,M,M)

D(Y,M,X,X)

D(N,M,X,X)

phantom most similar to TG43

GBBS(solid model applicator, body, balloon and rectal contrast, packing contrast)

Patient\_04 D(N,N,N,N) %difference from TG43

\*\*entire rectum overridden\*\*

left colpostat sagittal

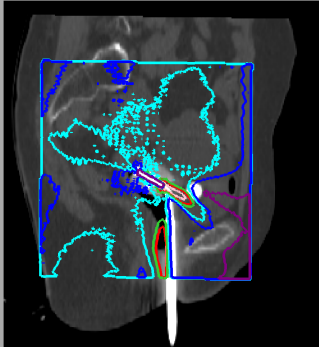

right colpostat sagittal

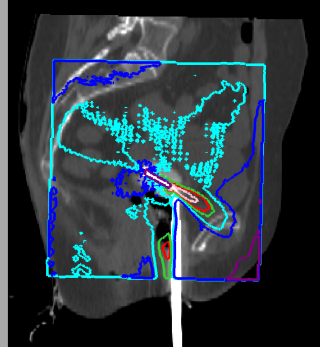

tandem sagittal

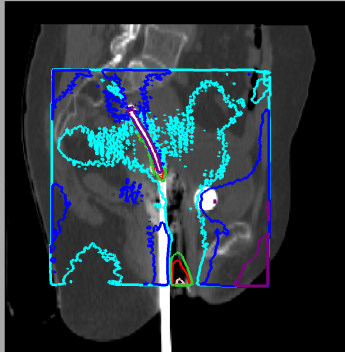

colpostats transverse

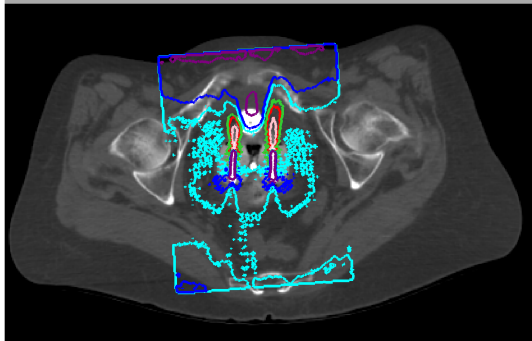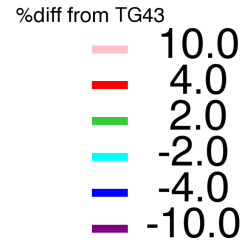

phantom least similar to TG43

D(Y,N,B,B)

D(Y,N,B,N)

D(Y,N,B,M)

-->D(N,N,N,N)<--

D(Y,N,N,N)

D(Y,N,M,M)

D(Y,M,X,X)

D(N,M,X,X)

phantom most similar to TG43

GBBS(solid model applicator, body, balloon and rectal contrast, packing contrast)

Patient\_04 D(Y,N,N,N) %difference from TG43

\*\*entire rectum overridden\*\*

left colpostat sagittal

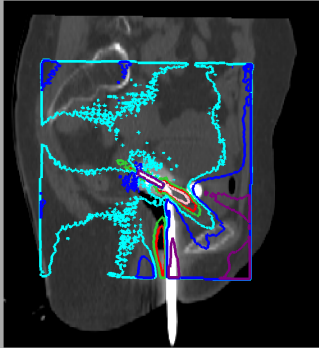

right colpostat sagittal

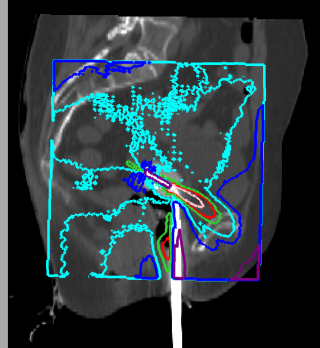

tandem sagittal

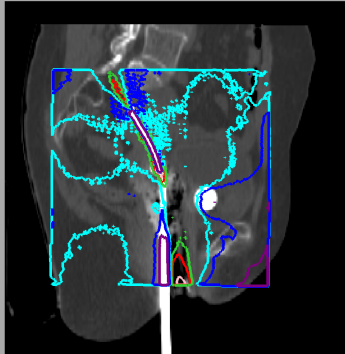

colpostats transverse

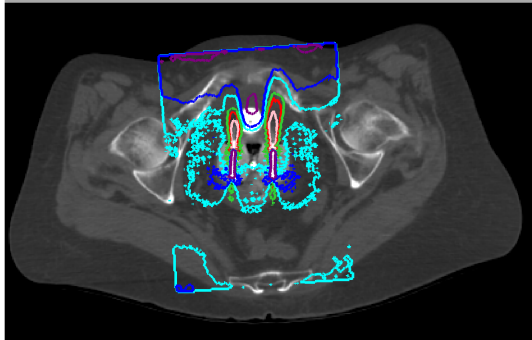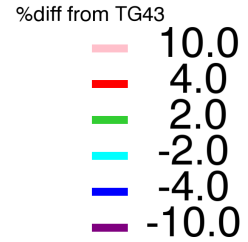

phantom least similar to TG43

D(Y,N,B,B)

D(Y,N,B,N)

D(Y,N,B,M)

D(N,N,N,N)

-->D(Y,N,N,N)<--

D(Y,N,M,M)

D(Y,M,X,X)

D(N,M,X,X)

phantom most similar to TG43

GBBS(solid model applicator, body, balloon and rectal contrast, packing contrast)

Patient\_04 D(Y,N,M,M) %difference from TG43

\*\*entire rectum overridden\*\*

left colpostat sagittal

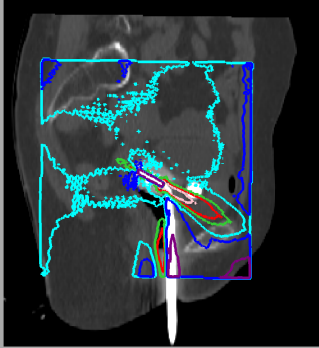

right colpostat sagittal

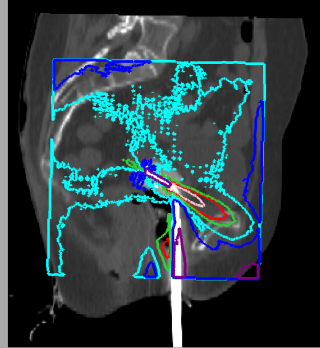

tandem sagittal

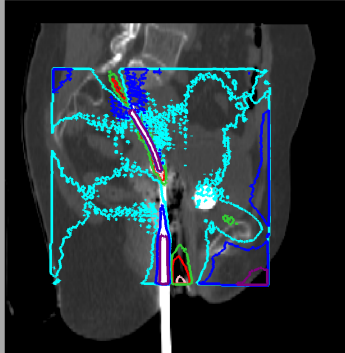

colpostats transverse

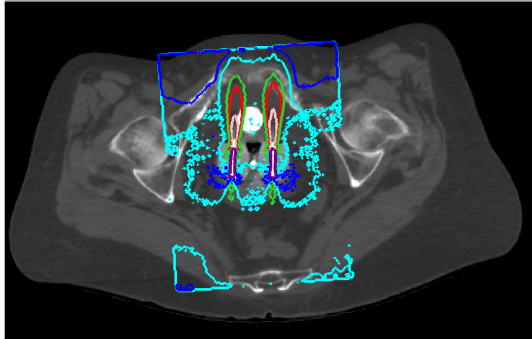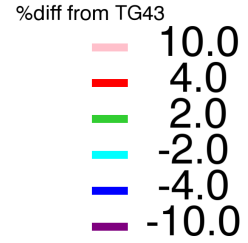

phantom least similar to TG43

D(Y,N,B,B)

D(Y,N,B,N)

D(Y,N,B,M)

D(N,N,N,N)

D(Y,N,N,N)

-->D(Y,N,M,M)<--

D(Y,M,X,X)

D(N,M,X,X)

phantom most similar to TG43

GBBS(solid model applicator, body, balloon and rectal contrast, packing contrast)

Patient\_04 D(Y,M,X,X) %difference from TG43

\*\*entire rectum overridden\*\*

left colpostat sagittal

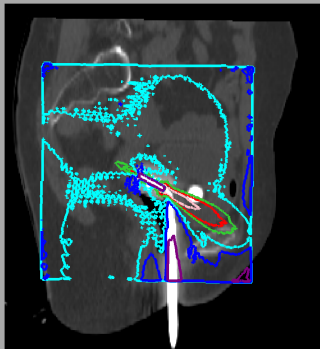

right colpostat sagittal

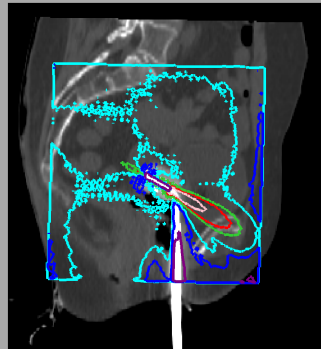

tandem sagittal

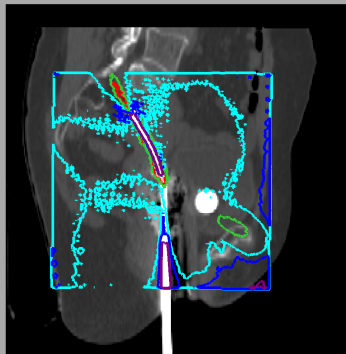

colpostats transverse

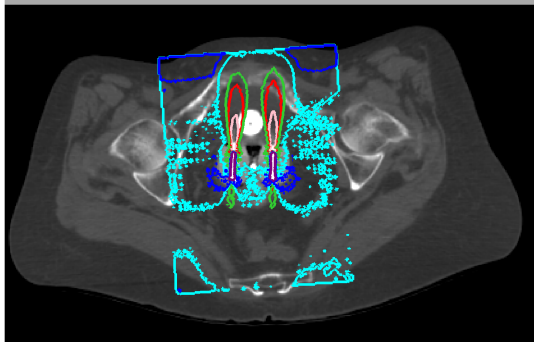

phantom least similar to TG43

D(Y,N,B,B)

D(Y,N,B,N)

D(Y,N,B,M)

D(N,N,N,N)

D(Y,N,N,N)

D(Y,N,M,M)

-->D(Y,M,X,X)<--

D(N,M,X,X)

phantom most similar to TG43

GBBS(solid model applicator, body, balloon and rectal contrast, packing contrast)



Patient\_04 D(N,M,X,X) %difference from TG43

\*\*entire rectum overridden\*\*

left colpostat sagittal

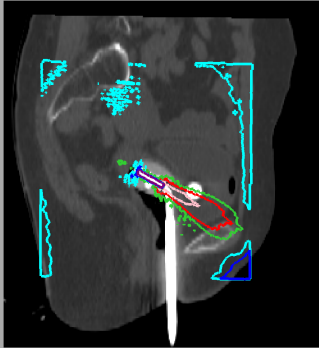

right colpostat sagittal

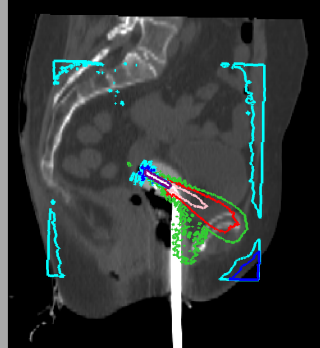

tandem sagittal

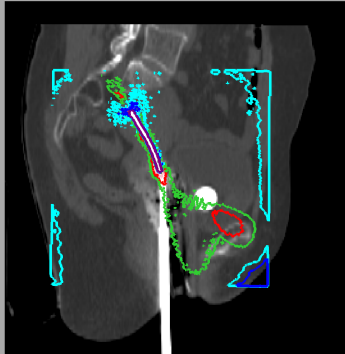

colpostats transverse

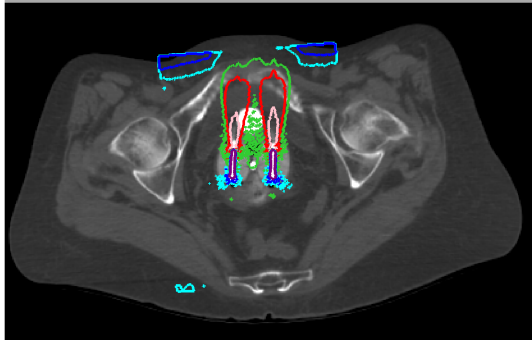

phantom least similar to TG43

D(Y,N,B,B)

D(Y,N,B,N)

D(Y,N,B,M)

D(N,N,N,N)

D(Y,N,N,N)

D(Y,N,M,M)

D(Y,M,X,X)

-->D(N,M,X,X)<--

phantom most similar to TG43

GBBS(solid model applicator, body, balloon and rectal contrast, packing contrast)

Patient\_05 D(Y,N,B,B) %difference from TG43

\*\*entire rectum overridden\*\*

left coronal sagittal

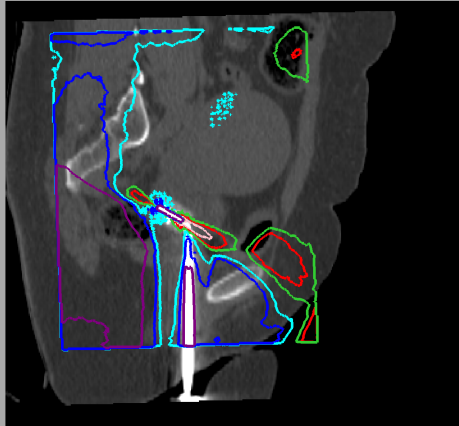

right coronal sagittal

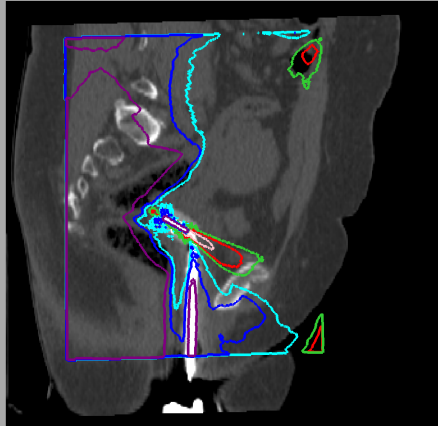

tandem sagittal

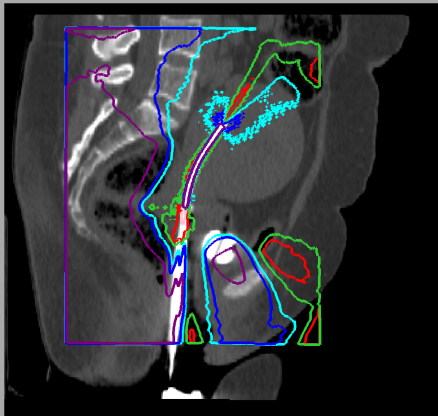

colpostats transverse

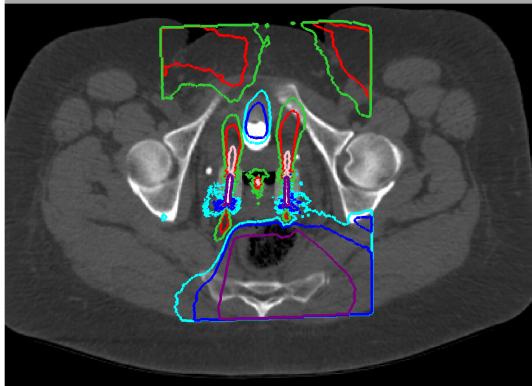

phantom least similar to TG43

-->D(Y,N,B,B)<--

D(Y,N,B,N)

D(Y,N,B,M)

D(N,N,N,N)

D(Y,N,N,N)

D(Y,N,M,M)

D(Y,M,X,X)

D(N,M,X,X)

phantom most similar to TG43

GBBS(solid model applicator, body, balloon and rectal contrast, packing contrast)

Patient\_05 D(Y,N,B,N) %difference from TG43

\*\*entire rectum overridden\*\*

left coronal sagittal

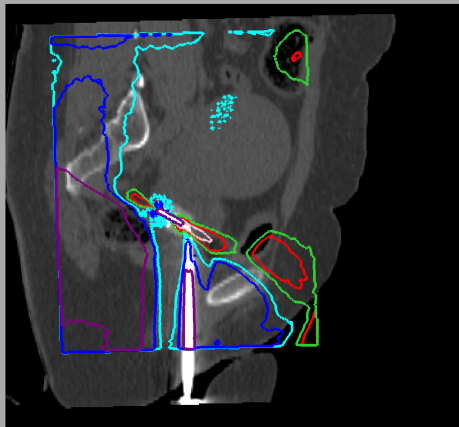

right coronal sagittal

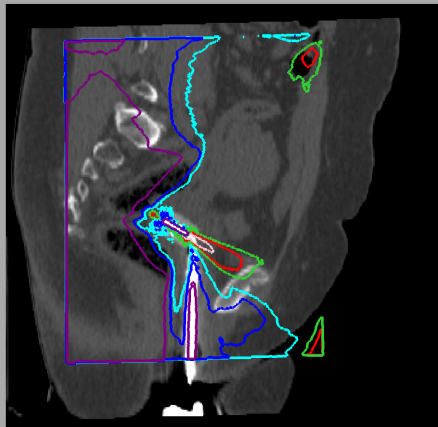

tandem sagittal

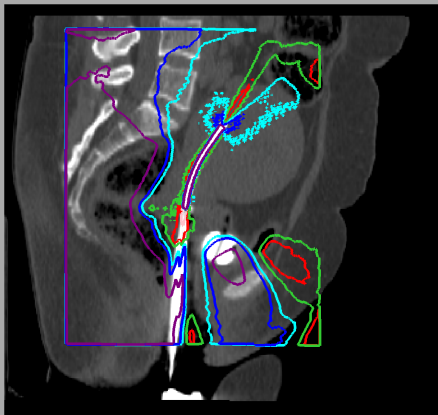

colpostats transverse

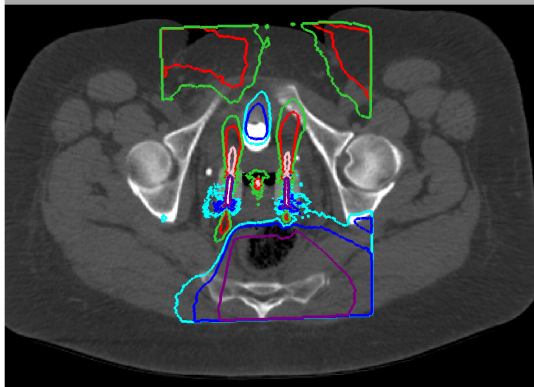

phantom least similar to TG43

D(Y,N,B,B)

-->D(Y,N,B,N)<--

D(Y,N,B,M)

D(N,N,N,N)

D(Y,N,N,N)

D(Y,N,M,M)

D(Y,M,X,X)

D(N,M,X,X)

phantom most similar to TG43

GBBS(solid model applicator, body, balloon and rectal contrast, packing contrast)

Patient\_05 D(Y,N,B,M) %difference from TG43

\*\*entire rectum overridden\*\*

left coronal sagittal

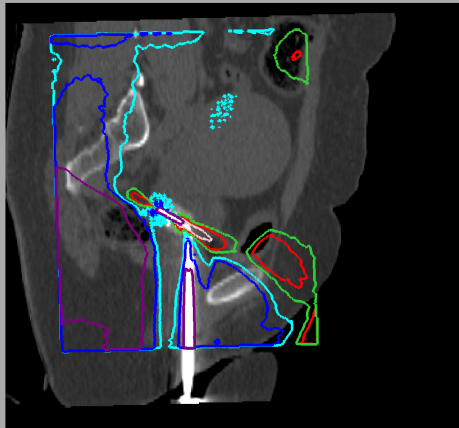

right coronal sagittal

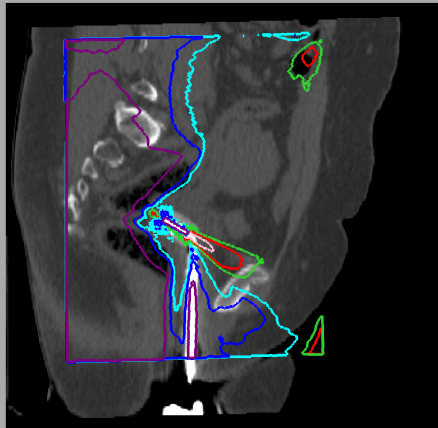

tandem sagittal



colpostats transverse



phantom least similar to TG43

D(Y,N,B,B)

D(Y,N,B,N)

-->D(Y,N,B,M)<--

D(N,N,N,N)

D(Y,N,N,N)

D(Y,N,M,M)

D(Y,M,X,X)

D(N,M,X,X)

phantom most similar to TG43

GBBS(solid model applicator, body, balloon and rectal contrast, packing contrast)

Patient\_05 D(N,N,N,N) %difference from TG43

\*\*entire rectum overridden\*\*

left coronal sagittal

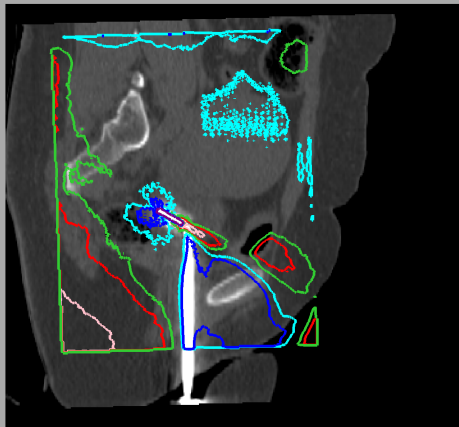

right coronal sagittal

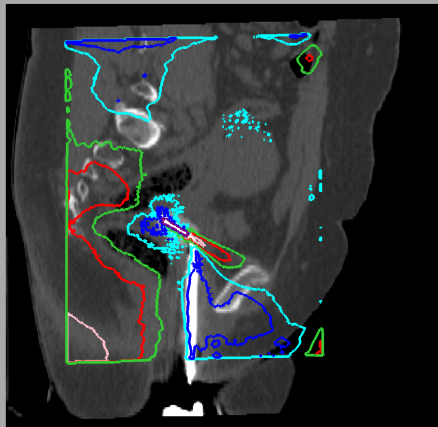

tandem sagittal

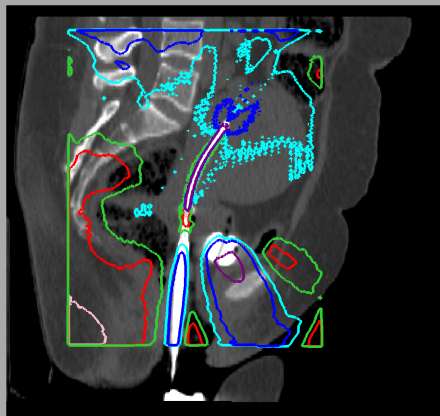

colpostats transverse

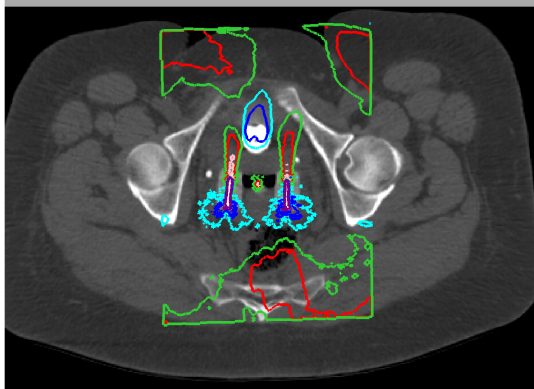

%diff from TG43



phantom least similar to TG43

D(Y,N,B,B)

D(Y,N,B,N)

D(Y,N,B,M)

-->D(N,N,N,N)<--

D(Y,N,N,N)

D(Y,N,M,M)

D(Y,M,X,X)

D(N,M,X,X)

phantom most similar to TG43

GBBS(solid model applicator, body, balloon and rectal contrast, packing contrast)

Patient\_05 D(Y,N,N,N) %difference from TG43

\*\*entire rectum overridden\*\*

left coronal sagittal

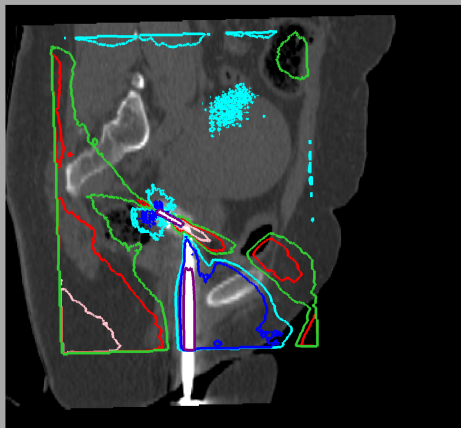

right coronal sagittal

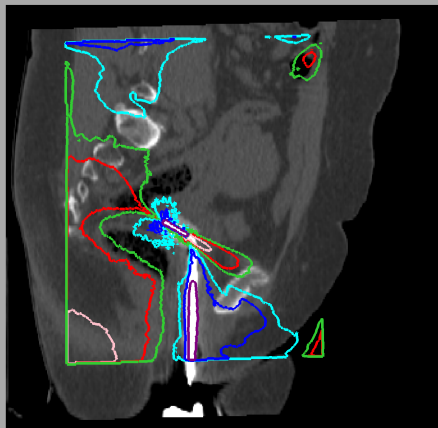

tandem sagittal

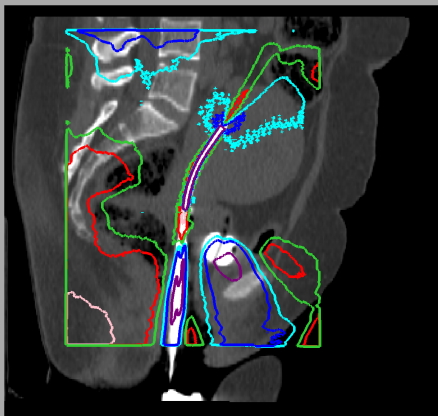

colpostats transverse

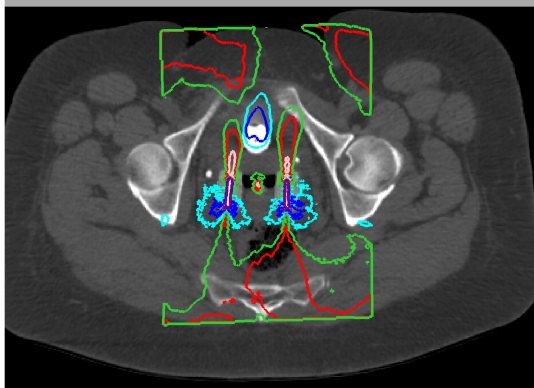

%diff from TG43



phantom least similar to TG43

D(Y,N,B,B)

D(Y,N,B,N)

D(Y,N,B,M)

D(N,N,N,N)

-->D(Y,N,N,N)<--

D(Y,N,M,M)

D(Y,M,X,X)

D(N,M,X,X)

phantom most similar to TG43

GBBS(solid model applicator, body, balloon and rectal contrast, packing contrast)

Patient\_05 D(Y,N,M,M) %difference from TG43

\*\*entire rectum overridden\*\*

left coronal sagittal

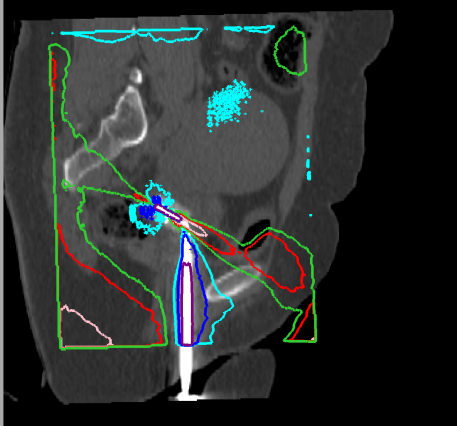

right coronal sagittal

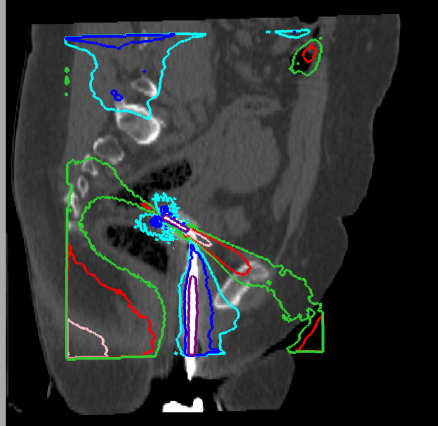

tandem sagittal

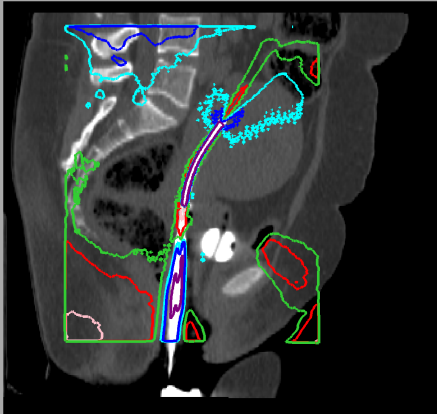

colpostats transverse

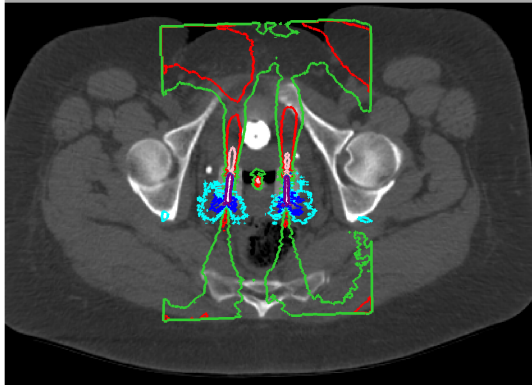

phantom least similar to TG43

D(Y,N,B,B)

D(Y,N,B,N)

D(Y,N,B,M)

D(N,N,N,N)

D(Y,N,N,N)

-->D(Y,N,M,M)<--

D(Y,M,X,X)

D(N,M,X,X)

phantom most similar to TG43

GBBS(solid model applicator, body, balloon and rectal contrast, packing contrast)

Patient\_05 D(Y,M,X,X) %difference from TG43

\*\*entire rectum overridden\*\*

left coronal sagittal

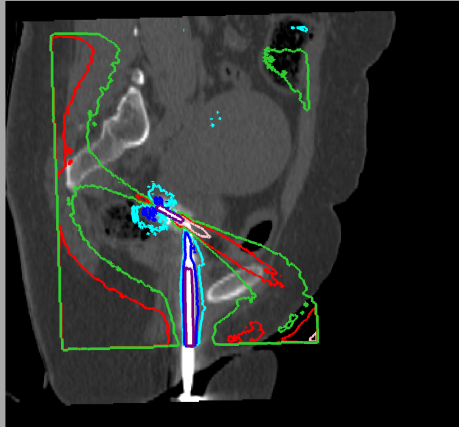

right coronal sagittal

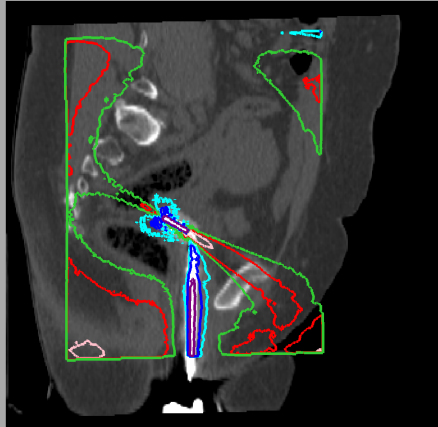

tandem sagittal

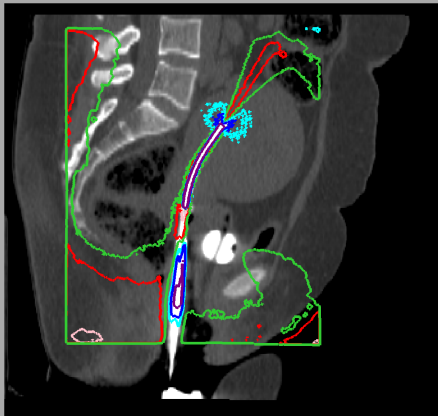

colpostats transverse

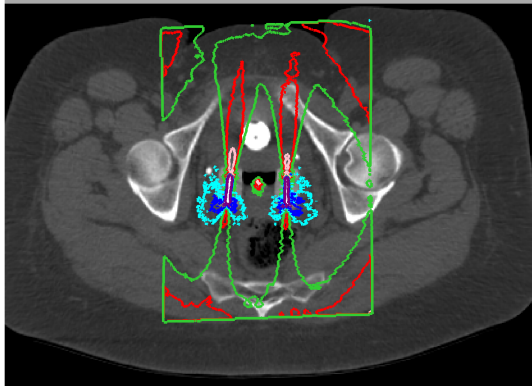

phantom least similar to TG43

D(Y,N,B,B)

D(Y,N,B,N)

D(Y,N,B,M)

D(N,N,N,N)

D(Y,N,N,N)

D(Y,N,M,M)

-->D(Y,M,X,X)<--

D(N,M,X,X)

phantom most similar to TG43

GBBS(solid model applicator, body, balloon and rectal contrast, packing contrast)



Patient\_05 D(N,M,X,X) %difference from TG43

\*\*entire rectum overridden\*\*

left coronal sagittal

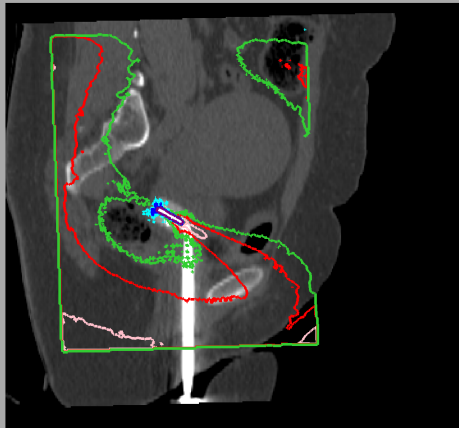

right coronal sagittal

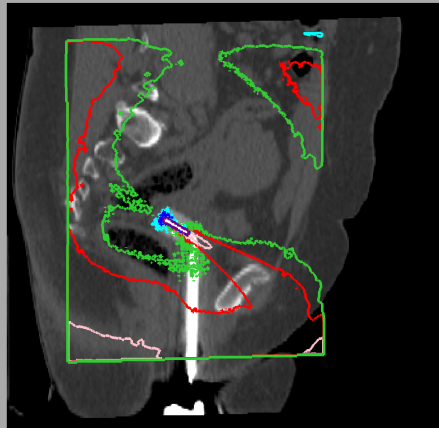

tandem sagittal

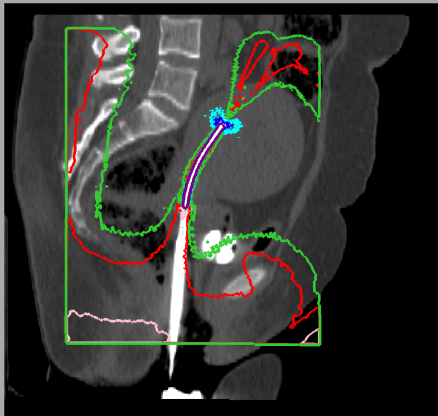

colpostats transverse

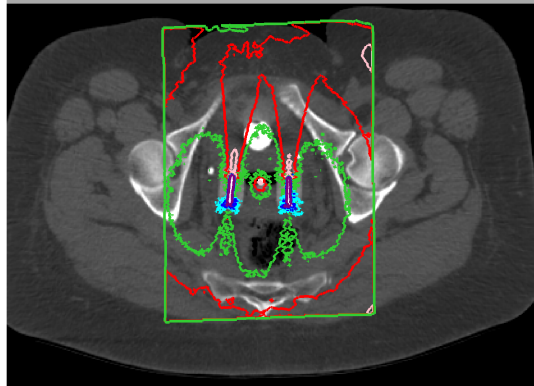

phantom least similar to TG43

D(Y,N,B,B)

D(Y,N,B,N)

D(Y,N,B,M)

D(N,N,N,N)

D(Y,N,N,N)

D(Y,N,M,M)

D(Y,M,X,X)

-->D(N,M,X,X)<--

phantom most similar to TG43

GBBS(solid model applicator, body, balloon and rectal contrast, packing contrast)

Patient\_06 D(Y,N,B,B) %difference from TG43

left colpostat sagittal

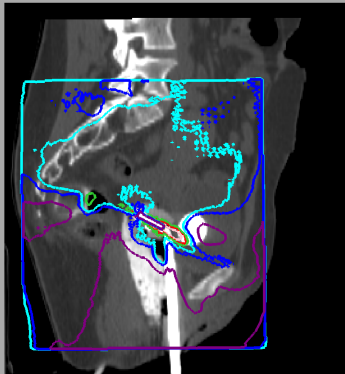

right colpostat sagittal

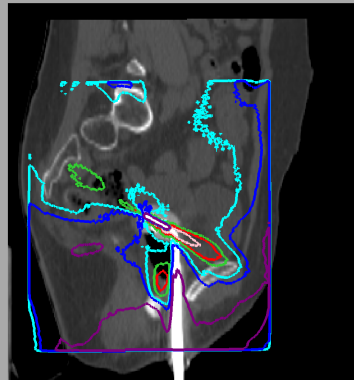

tandem sagittal

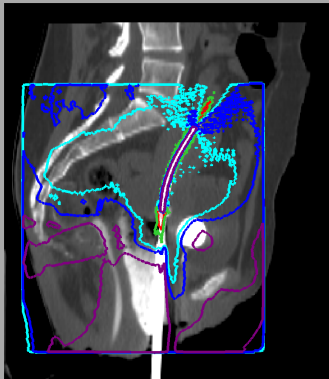

colpostats transverse

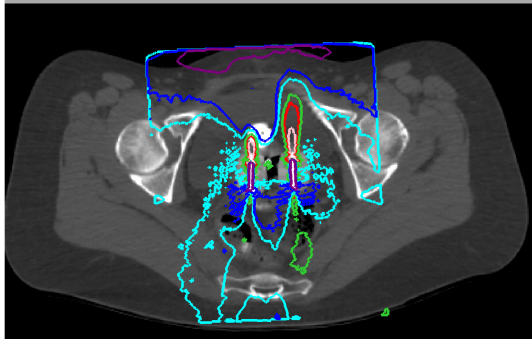

%diff from TG43

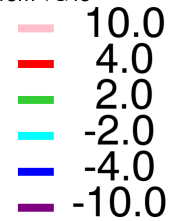

phantom least similar to TG43

-->D(Y,N,B,B)<--

D(Y,N,B,N)

D(Y,N,B,M)

D(N,N,N,N)

D(Y,N,N,N)

D(Y,N,M,M)

D(Y,M,X,X)

D(N,M,X,X)

phantom most similar to TG43

GBBS(solid model applicator, body, balloon and rectal contrast, packing contrast)

Patient\_06 D(Y,N,B,N) %difference from TG43

left colpostat sagittal

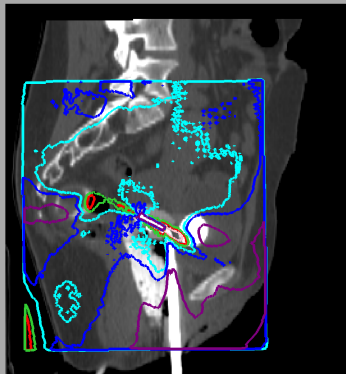

right colpostat sagittal

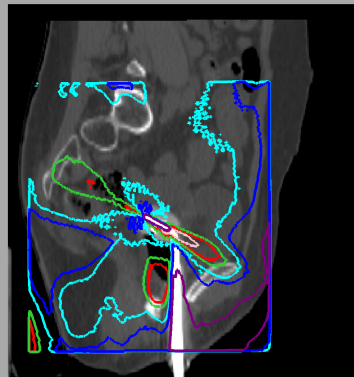

tandem sagittal

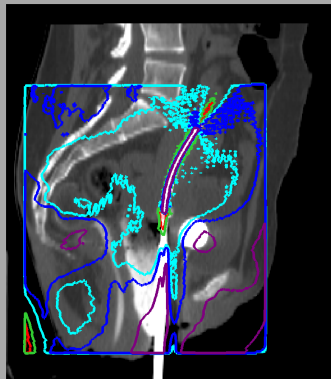

colpostats transverse

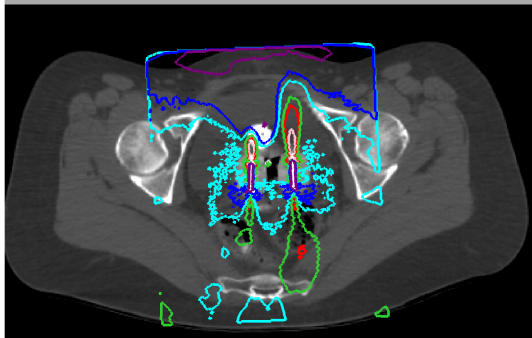

%diff from TG43



phantom least similar to TG43

D(Y,N,B,B)

-->D(Y,N,B,N)<--

D(Y,N,B,M)

D(N,N,N,N)

D(Y,N,N,N)

D(Y,N,M,M)

D(Y,M,X,X)

D(N,M,X,X)

phantom most similar to TG43

GBBS(solid model applicator, body, balloon and rectal contrast, packing contrast)

Patient\_06 D(Y,N,B,M) %difference from TG43

left colpostat sagittal

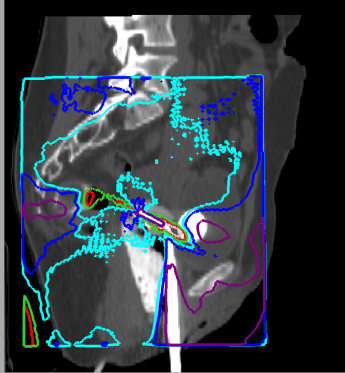

right colpostat sagittal

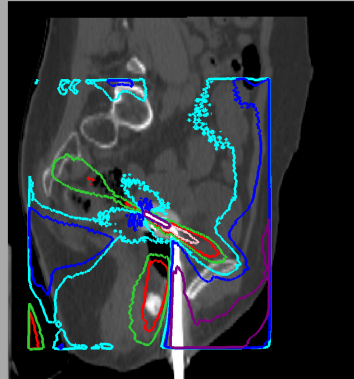

tandem sagittal

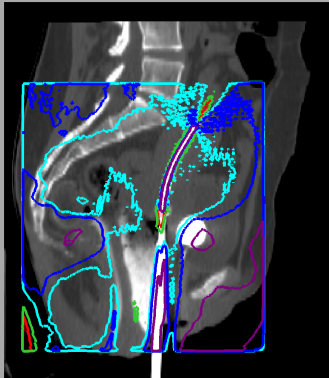

colpostats transverse

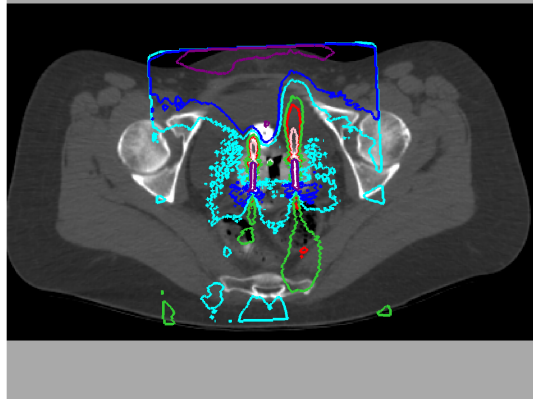

%diff from TG43

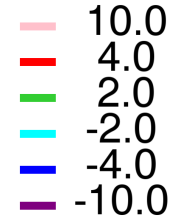

phantom least similar to TG43

D(Y,N,B,B)

D(Y,N,B,N)

-->D(Y,N,B,M)<--

D(N,N,N,N)

D(Y,N,N,N)

D(Y,N,M,M)

D(Y,M,X,X)

D(N,M,X,X)

phantom most similar to TG43

GBBS(solid model applicator, body, balloon and rectal contrast, packing contrast)

Patient\_06 D(N,N,N,N) %difference from TG43

left colpostat sagittal

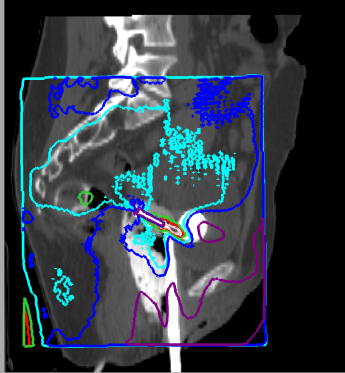

right colpostat sagittal

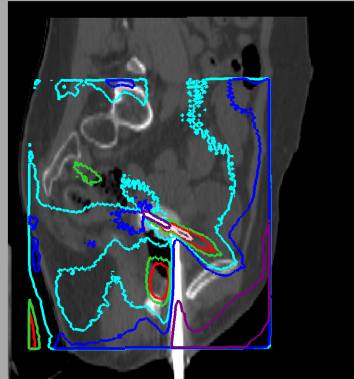

tandem sagittal

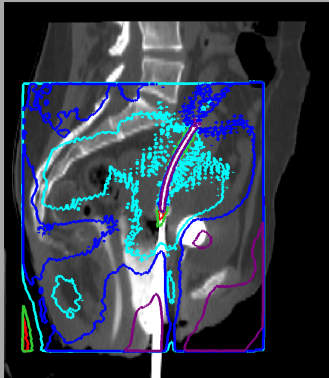

colpostats transverse

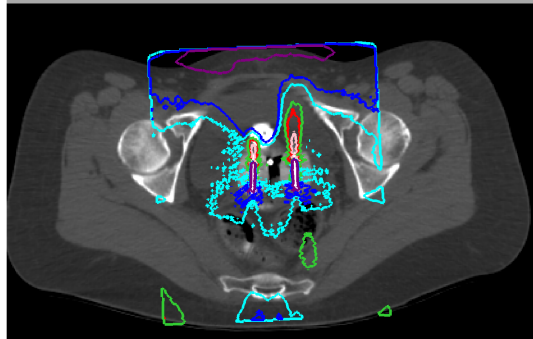

%diff from TG43

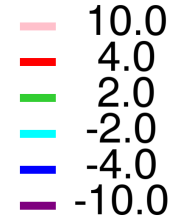

phantom least similar to TG43

D(Y,N,B,B)

D(Y,N,B,N)

D(Y,N,B,M)

-->D(N,N,N,N)<--

D(Y,N,N,N)

D(Y,N,M,M)

D(Y,M,X,X)

D(N,M,X,X)

phantom most similar to TG43

GBBS(solid model applicator, body, balloon and rectal contrast, packing contrast)

Patient\_06 D(Y,N,N,N) %difference from TG43

left colpostat sagittal

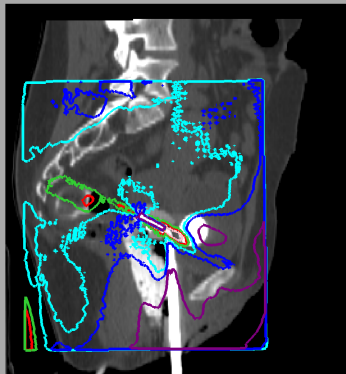

right colpostat sagittal

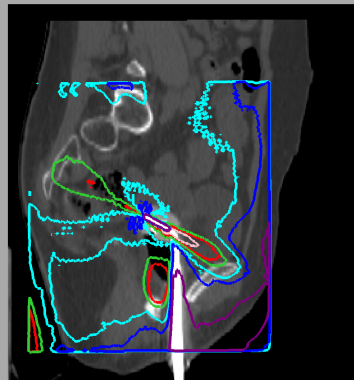

tandem sagittal

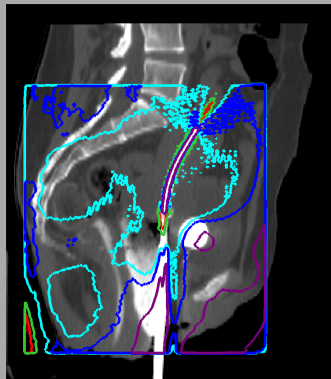

colpostats transverse

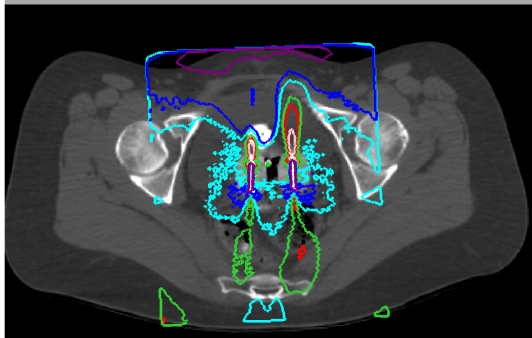

%diff from TG43



phantom least similar to TG43

D(Y,N,B,B)

D(Y,N,B,N)

D(Y,N,B,M)

D(N,N,N,N)

-->D(Y,N,N,N)<--

D(Y,N,M,M)

D(Y,M,X,X)

D(N,M,X,X)

phantom most similar to TG43

GBBS(solid model applicator, body, balloon and rectal contrast, packing contrast)

Patient\_06 D(Y,N,M,M) %difference from TG43

left colpostat sagittal

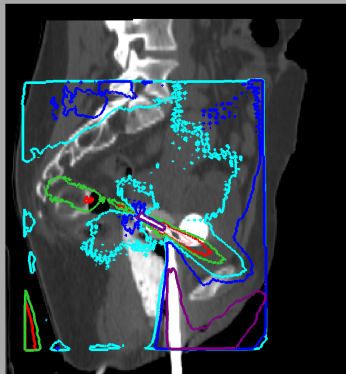

right colpostat sagittal

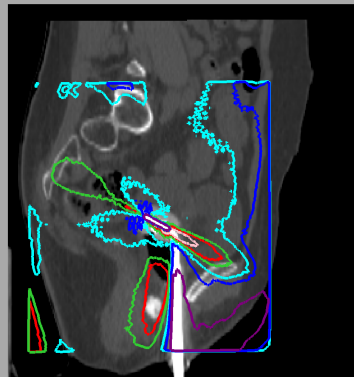

tandem sagittal

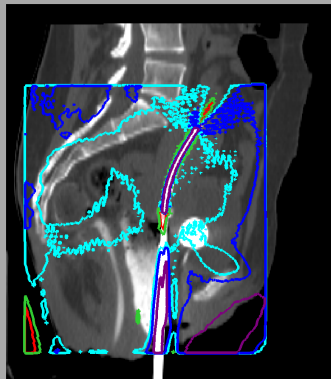

colpostats transverse

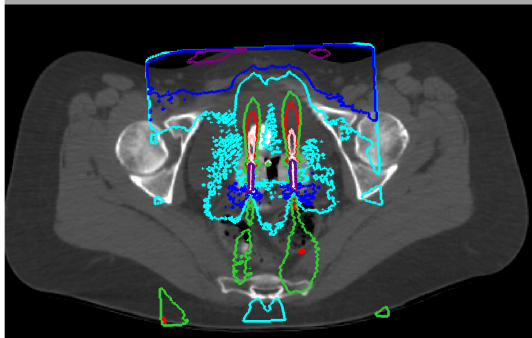

phantom least similar to TG43

D(Y,N,B,B)

D(Y,N,B,N)

D(Y,N,B,M)

D(N,N,N,N)

D(Y,N,N,N)

-->D(Y,N,M,M)<--

D(Y,M,X,X)

D(N,M,X,X)

phantom most similar to TG43

GBBS(solid model applicator, body, balloon and rectal contrast, packing contrast)

Patient\_06 D(Y,M,X,X) %difference from TG43

left colpostat sagittal

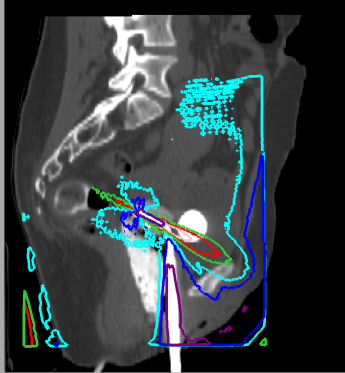

right colpostat sagittal

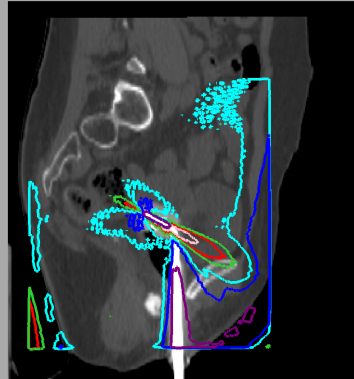

tandem sagittal

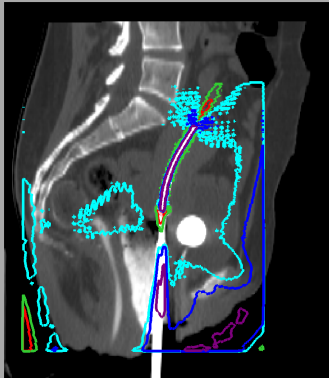

colpostats transverse

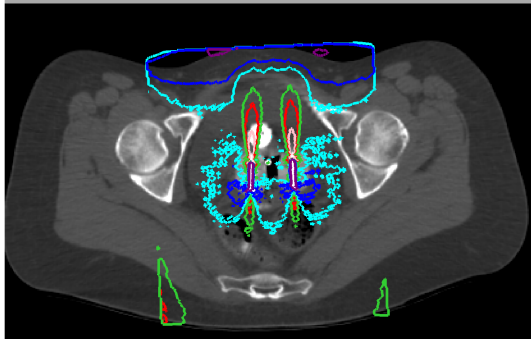

%diff from TG43

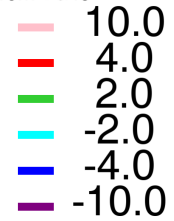

phantom least similar to TG43

D(Y,N,B,B)

D(Y,N,B,N)

D(Y,N,B,M)

D(N,N,N,N)

D(Y,N,N,N)

D(Y,N,M,M)

-->D(Y,M,X,X)<--

D(N,M,X,X)

phantom most similar to TG43

GBBS(solid model applicator, body, balloon and rectal contrast, packing contrast)



Patient\_06 D(N,M,X,X) %difference from TG43

left colpostat sagittal

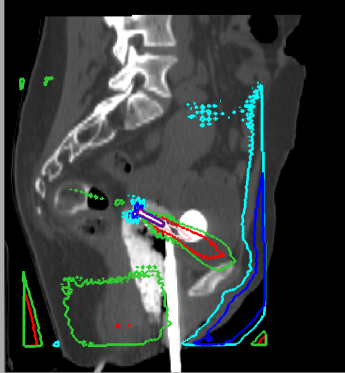

right colpostat sagittal

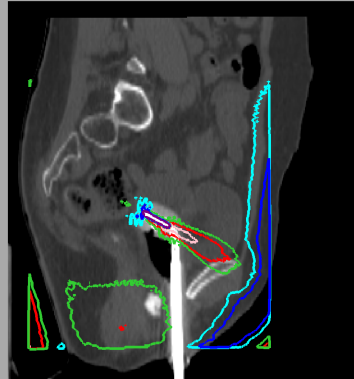

tandem sagittal

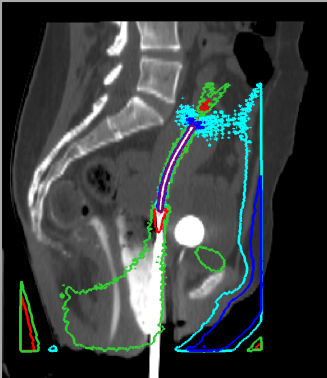

colpostats transverse

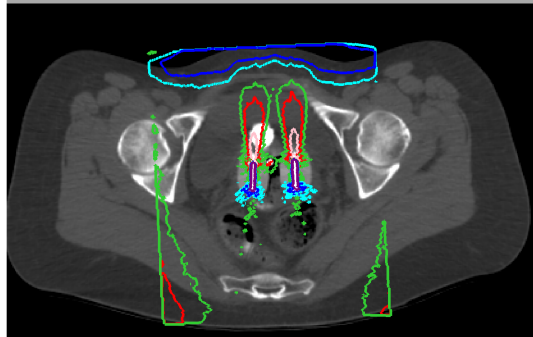

%diff from TG43

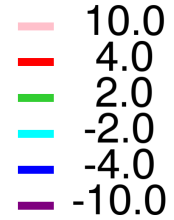

phantom least similar to TG43

D(Y,N,B,B)

D(Y,N,B,N)

D(Y,N,B,M)

D(N,N,N,N)

D(Y,N,N,N)

D(Y,N,M,M)

D(Y,M,X,X)

-->D(N,M,X,X)<--

phantom most similar to TG43

GBBS(solid model applicator, body, balloon and rectal contrast, packing contrast)

Patient\_07 D(Y,N,B,B) %difference from TG43

left colpostat sagittal

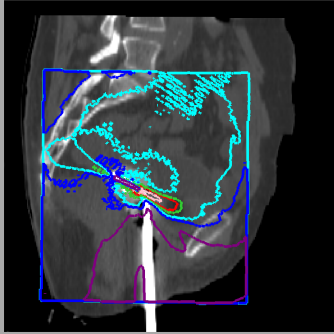

right colpostat sagittal

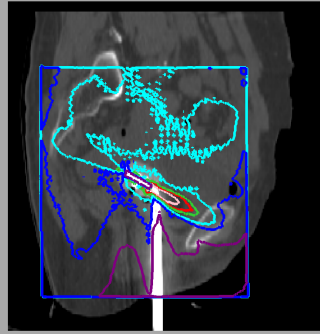

tandem sagittal

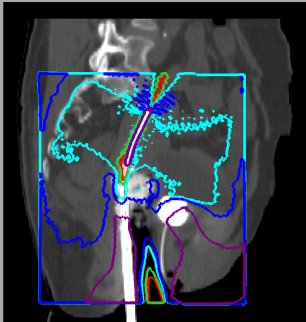

colpostats transverse

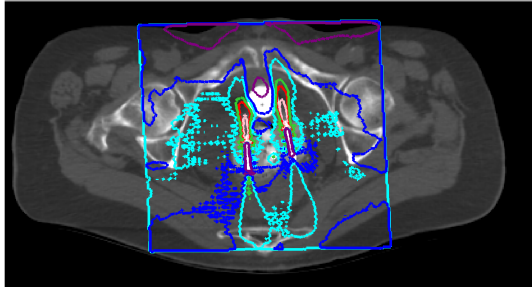

phantom least similar to TG43

-->D(Y,N,B,B)<--

D(Y,N,B,N)

D(Y,N,B,M)

D(N,N,N,N)

D(Y,N,N,N)

D(Y,N,M,M)

D(Y,M,X,X)

D(N,M,X,X)

phantom most similar to TG43

GBBS(solid model applicator, body, balloon and rectal contrast, packing contrast)

Patient\_07 D(Y,N,B,N) %difference from TG43

left colpostat sagittal

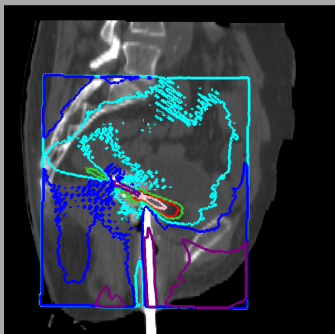

right colpostat sagittal

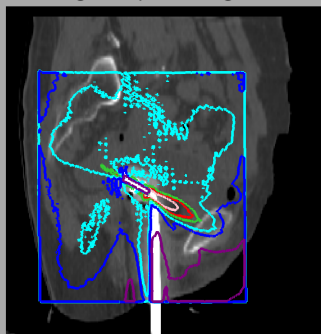

tandem sagittal

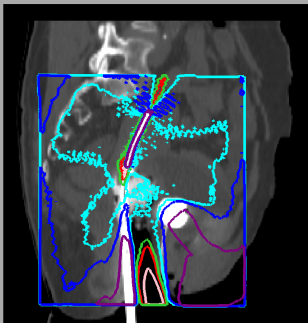

colpostats transverse

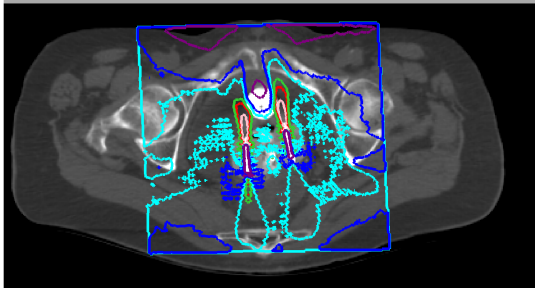

%diff from TG43

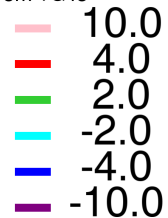

phantom least similar to TG43

D(Y,N,B,B)

-->D(Y,N,B,N)<--

D(Y,N,B,M)

D(N,N,N,N)

D(Y,N,N,N)

D(Y,N,M,M)

D(Y,M,X,X)

D(N,M,X,X)

phantom most similar to TG43

GBBS(solid model applicator, body, balloon and rectal contrast, packing contrast)

Patient\_07 D(Y,N,B,M) %difference from TG43

left colpostat sagittal

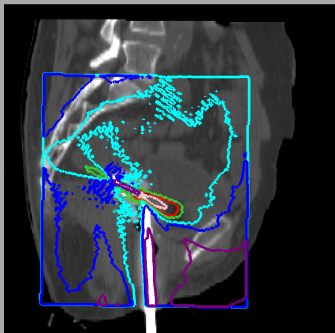

right colpostat sagittal

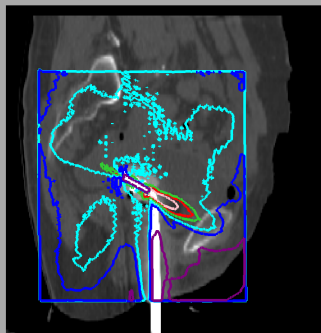

tandem sagittal

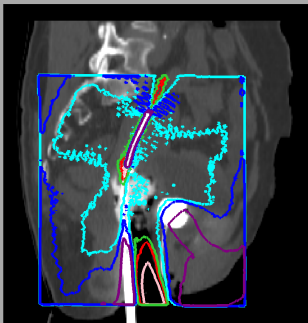

colpostats transverse

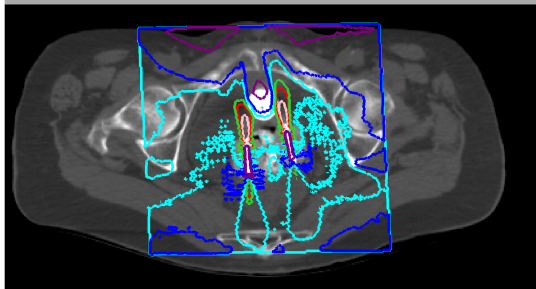

%diff from TG43



phantom least similar to TG43

D(Y,N,B,B)

D(Y,N,B,N)

-->D(Y,N,B,M)<--

D(N,N,N,N)

D(Y,N,N,N)

D(Y,N,M,M)

D(Y,M,X,X)

D(N,M,X,X)

phantom most similar to TG43

GBBS(solid model applicator, body, balloon and rectal contrast, packing contrast)

Patient\_07 D(N,N,N,N) %difference from TG43

left colpostat sagittal

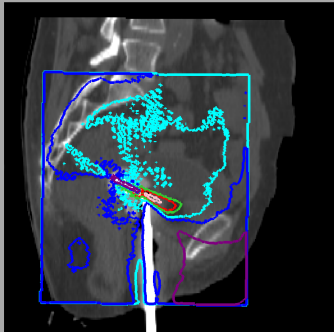

right colpostat sagittal

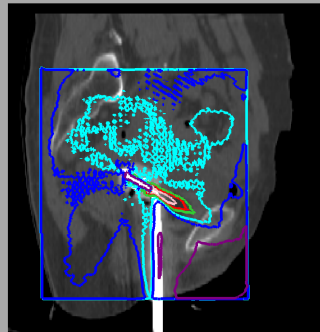

tandem sagittal

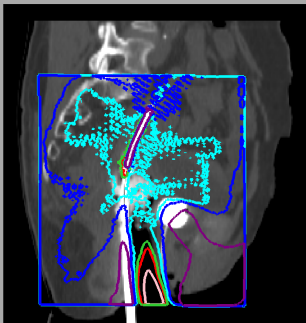

colpostats transverse

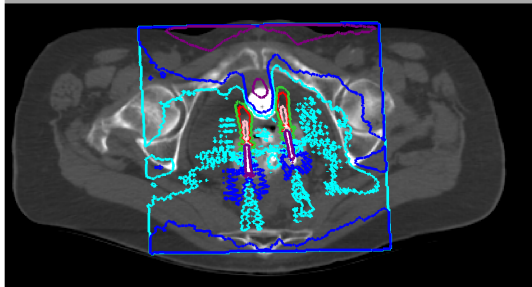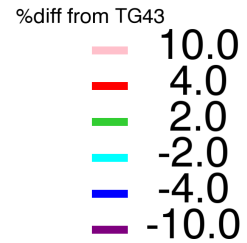

phantom least similar to TG43

D(Y,N,B,B)

D(Y,N,B,N)

D(Y,N,B,M)

-->D(N,N,N,N)<--

D(Y,N,N,N)

D(Y,N,M,M)

D(Y,M,X,X)

D(N,M,X,X)

phantom most similar to TG43

GBBS(solid model applicator, body, balloon and rectal contrast, packing contrast)

Patient\_07 D(Y,N,N,N) %difference from TG43

left colpostat sagittal

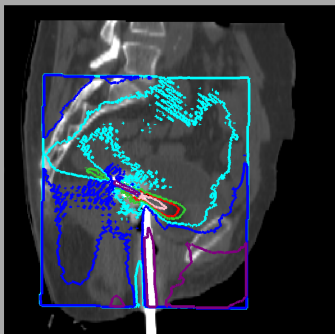

right colpostat sagittal

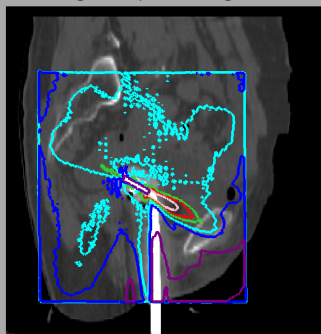

tandem sagittal

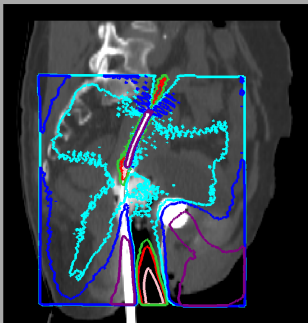

colpostats transverse

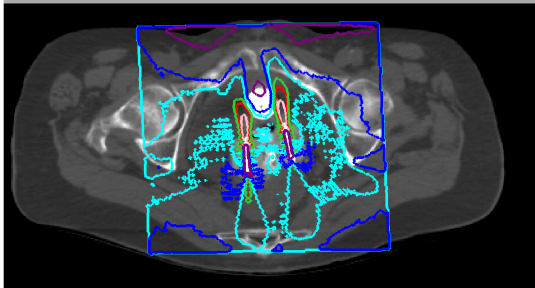

%diff from TG43



phantom least similar to TG43

D(Y,N,B,B)

D(Y,N,B,N)

D(Y,N,B,M)

D(N,N,N,N)

-->D(Y,N,N,N)<--

D(Y,N,M,M)

D(Y,M,X,X)

D(N,M,X,X)

phantom most similar to TG43

GBBS(solid model applicator, body, balloon and rectal contrast, packing contrast)

Patient\_07 D(Y,N,M,M) %difference from TG43

left colpostat sagittal

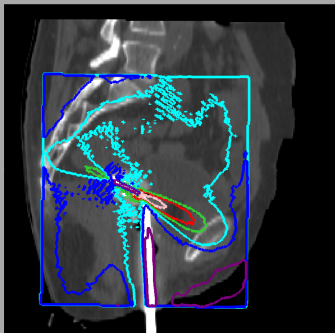

right colpostat sagittal

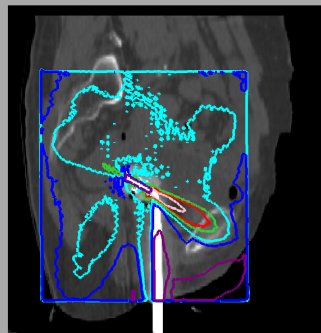

tandem sagittal

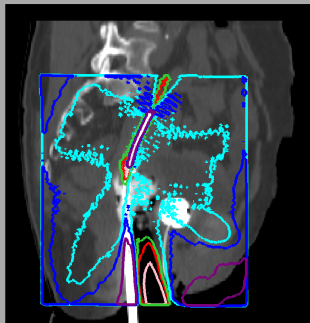

colpostats transverse

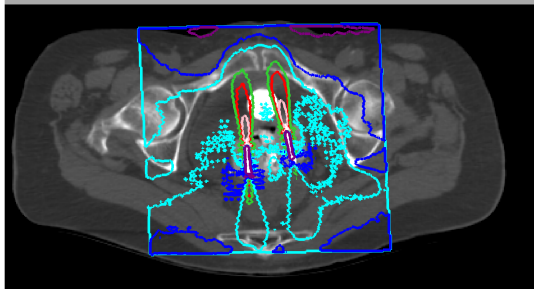

%diff from TG43



phantom least similar to TG43

D(Y,N,B,B)

D(Y,N,B,N)

D(Y,N,B,M)

D(N,N,N,N)

D(Y,N,N,N)

-->D(Y,N,M,M)<--

D(Y,M,X,X)

D(N,M,X,X)

phantom most similar to TG43

GBBS(solid model applicator, body, balloon and rectal contrast, packing contrast)

Patient\_07 D(Y,M,X,X) %difference from TG43

left colpostat sagittal

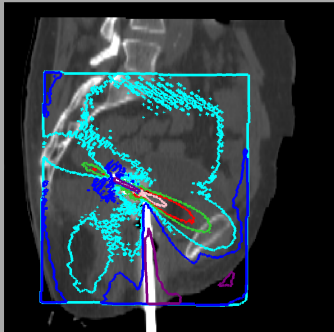

right colpostat sagittal

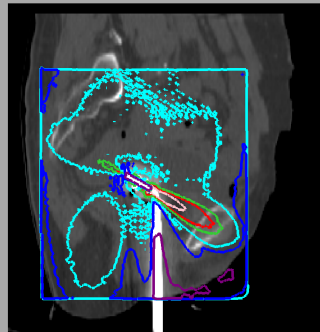

tandem sagittal

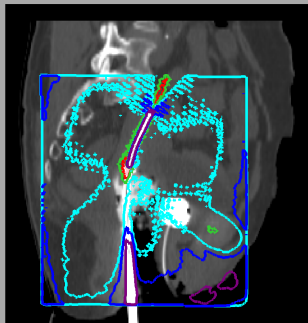

colpostats transverse

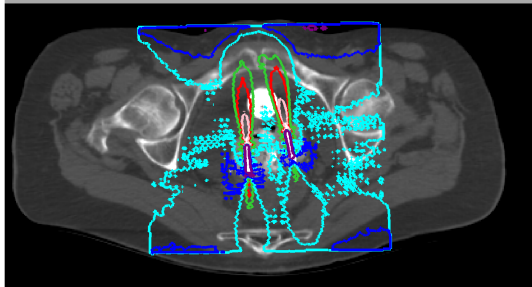

%diff from TG43



phantom least similar to TG43

D(Y,N,B,B)

D(Y,N,B,N)

D(Y,N,B,M)

D(N,N,N,N)

D(Y,N,N,N)

D(Y,N,M,M)

-->D(Y,M,X,X)<--

D(N,M,X,X)

phantom most similar to TG43

GBBS(solid model applicator, body, balloon and rectal contrast, packing contrast)



Patient\_07 D(N,M,X,X) %difference from TG43

left colpostat sagittal

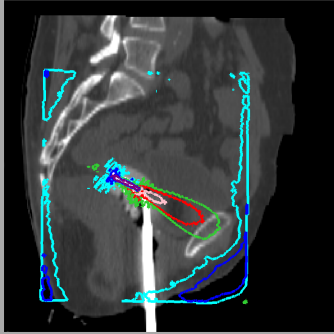

right colpostat sagittal

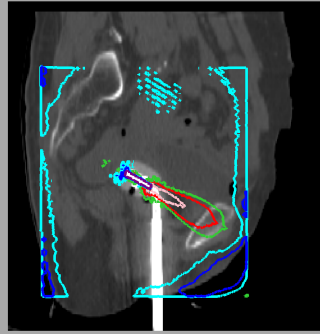

tandem sagittal

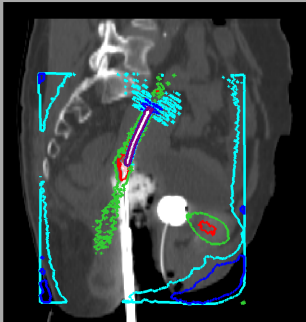

colpostats transverse

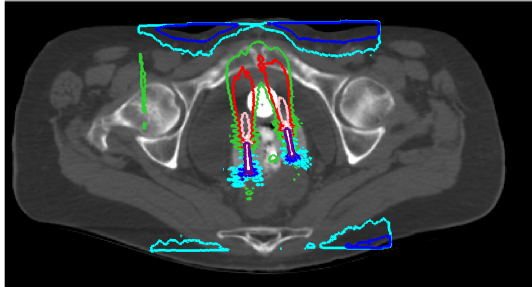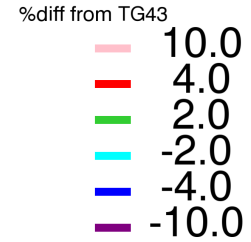

phantom least similar to TG43

D(Y,N,B,B)

D(Y,N,B,N)

D(Y,N,B,M)

D(N,N,N,N)

D(Y,N,N,N)

D(Y,N,M,M)

D(Y,M,X,X)

-->D(N,M,X,X)<--

phantom most similar to TG43

GBBS(solid model applicator, body, balloon and rectal contrast, packing contrast)

Patient\_08 D(Y,N,B,B) %difference from TG43

left colpostat sagittal

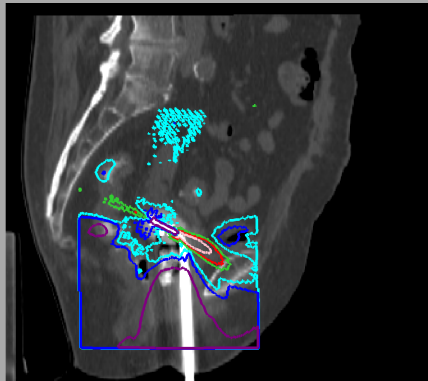

right colpostat sagittal

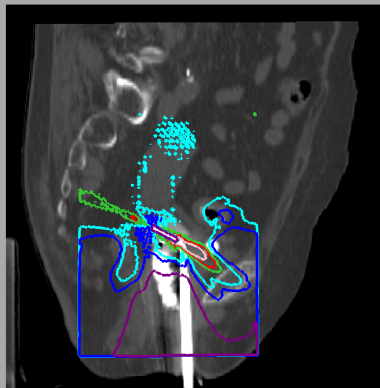

tandem sagittal

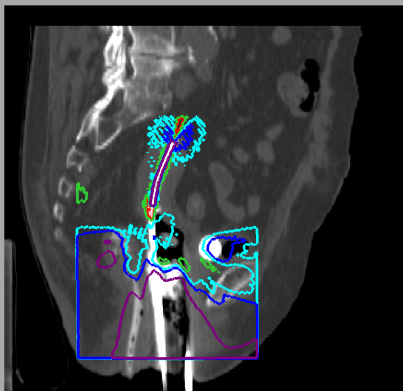

colpostats transverse

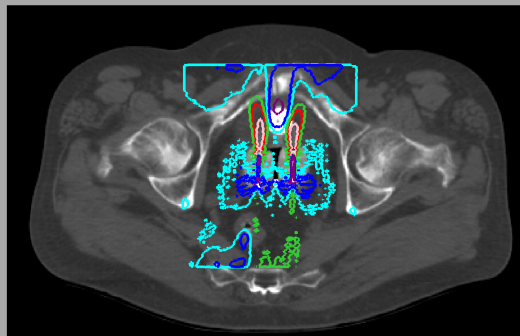

phantom least similar to TG43

-->D(Y,N,B,B)<--

D(Y,N,B,N)

D(Y,N,B,M)

D(N,N,N,N)

D(Y,N,N,N)

D(Y,N,M,M)

D(Y,M,X,X)

D(N,M,X,X)

phantom most similar to TG43

GBBS(solid model applicator, body, balloon and rectal contrast, packing contrast)

Patient\_08 D(Y,N,B,N) %difference from TG43

left colpostat sagittal

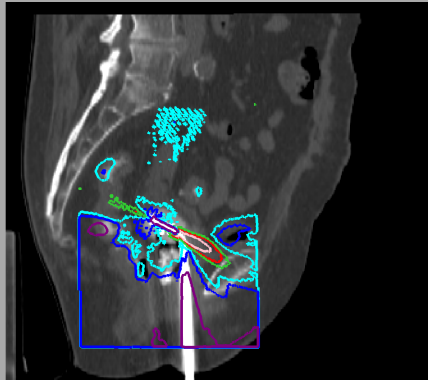

right colpostat sagittal

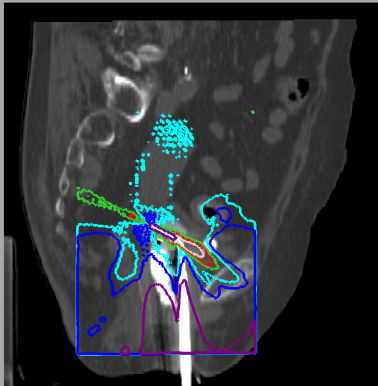

tandem sagittal

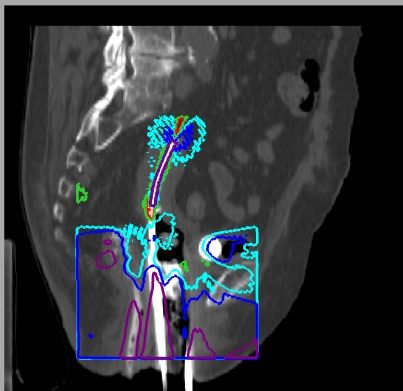

colpostats transverse

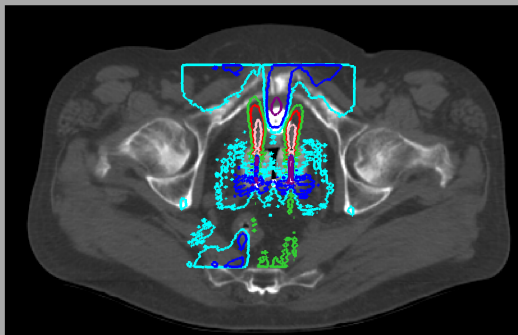

%diff from TG43



phantom least similar to TG43

D(Y,N,B,B)

-->D(Y,N,B,N)<--

D(Y,N,B,M)

D(N,N,N,N)

D(Y,N,N,N)

D(Y,N,M,M)

D(Y,M,X,X)

D(N,M,X,X)

phantom most similar to TG43

GBBS(solid model applicator, body, balloon and rectal contrast, packing contrast)

Patient\_08 D(Y,N,B,M) %difference from TG43

left colpostat sagittal

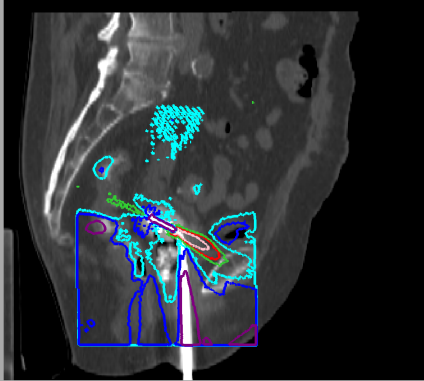

right colpostat sagittal

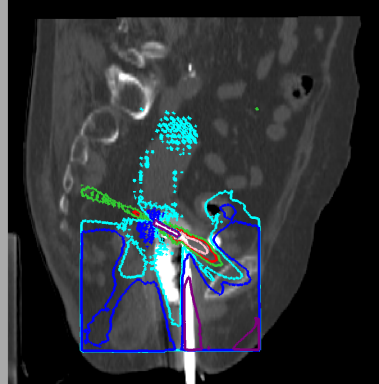

tandem sagittal

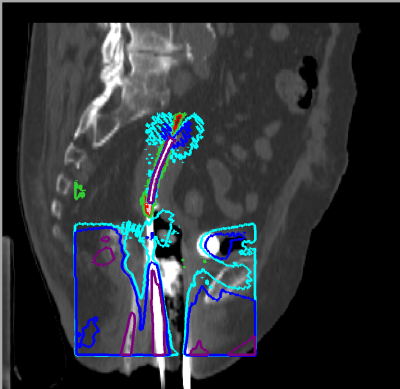

colpostats transverse

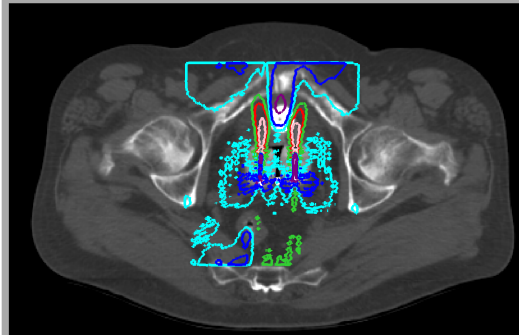

%diff from TG43

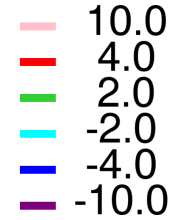

phantom least similar to TG43

D(Y,N,B,B)

D(Y,N,B,N)

-->D(Y,N,B,M)<--

D(N,N,N,N)

D(Y,N,N,N)

D(Y,N,M,M)

D(Y,M,X,X)

D(N,M,X,X)

phantom most similar to TG43

GBBS(solid model applicator, body, balloon and rectal contrast, packing contrast)

Patient\_08 D(N,N,N,N) %difference from TG43

left colpostat sagittal

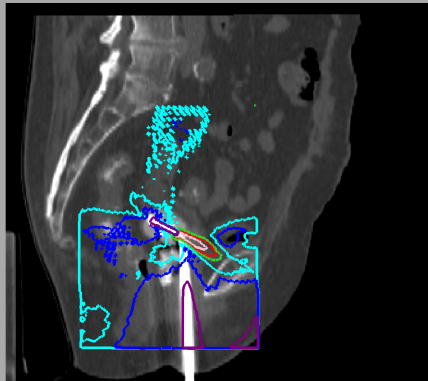

right colpostat sagittal

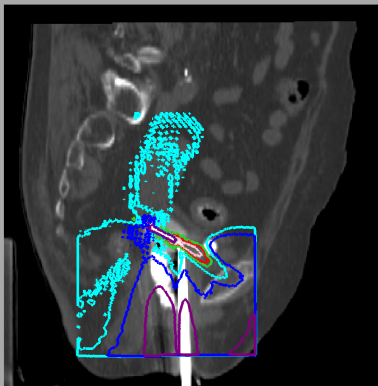

tandem sagittal

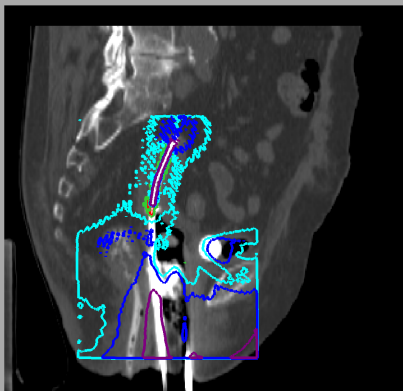

colpostats transverse

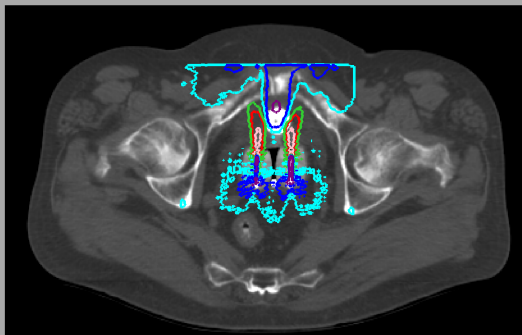

%diff from TG43



phantom least similar to TG43

D(Y,N,B,B)

D(Y,N,B,N)

D(Y,N,B,M)

-->D(N,N,N,N)<--

D(Y,N,N,N)

D(Y,N,M,M)

D(Y,M,X,X)

D(N,M,X,X)

phantom most similar to TG43

GBBS(solid model applicator, body, balloon and rectal contrast, packing contrast)

Patient\_08 D(Y,N,N,N) %difference from TG43

left colpostat sagittal

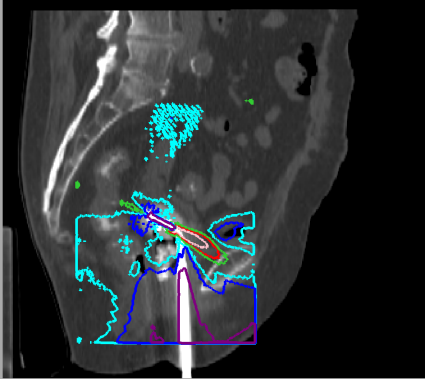

right colpostat sagittal

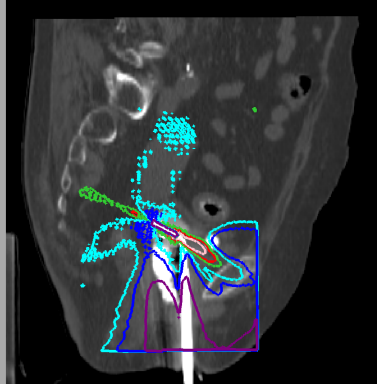

tandem sagittal

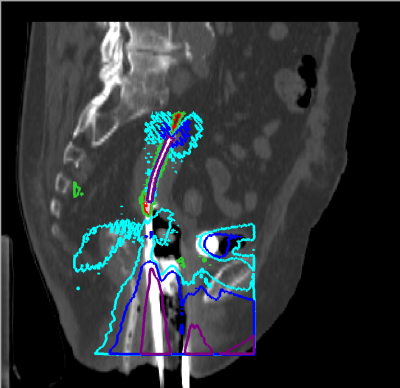

colpostats transverse

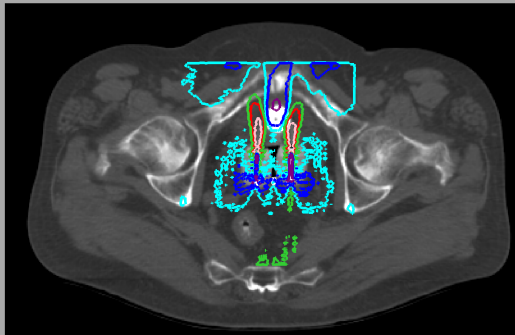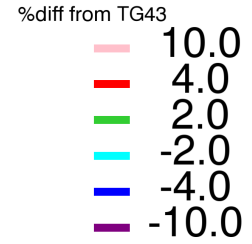

phantom least similar to TG43

D(Y,N,B,B)

D(Y,N,B,N)

D(Y,N,B,M)

D(N,N,N,N)

-->D(Y,N,N,N)<--

D(Y,N,M,M)

D(Y,M,X,X)

D(N,M,X,X)

phantom most similar to TG43

GBBS(solid model applicator, body, balloon and rectal contrast, packing contrast)

Patient\_08 D(Y,N,M,M) %difference from TG43

left colpostat sagittal

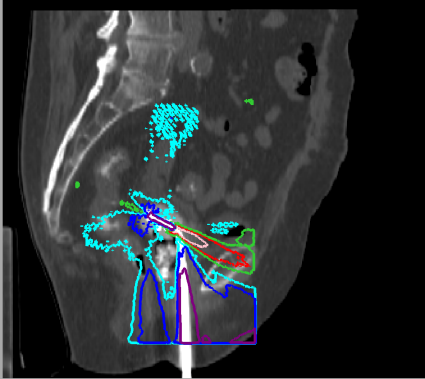

right colpostat sagittal

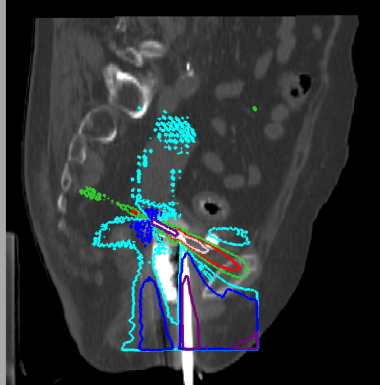

tandem sagittal

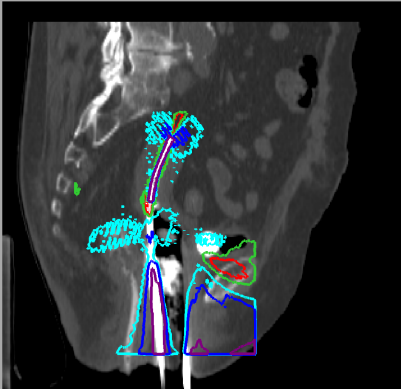

colpostats transverse

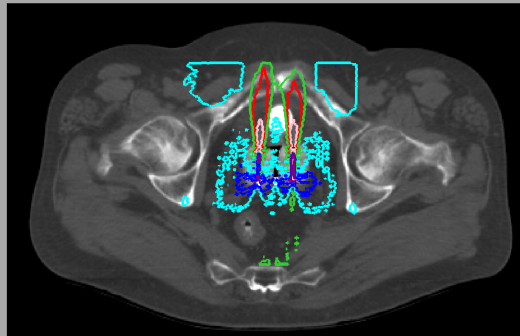

phantom least similar to TG43

D(Y,N,B,B)

D(Y,N,B,N)

D(Y,N,B,M)

D(N,N,N,N)

D(Y,N,N,N)

-->D(Y,N,M,M)<--

D(Y,M,X,X)

D(N,M,X,X)

phantom most similar to TG43

GBBS(solid model applicator, body, balloon and rectal contrast, packing contrast)

Patient\_08 D(Y,M,X,X) %difference from TG43

left colpostat sagittal

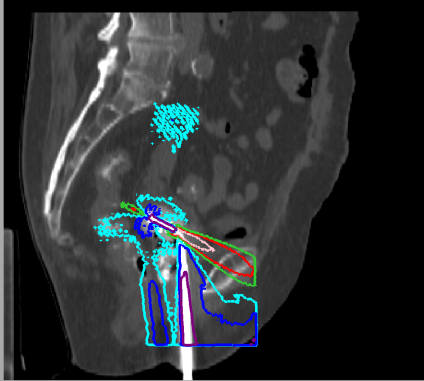

right colpostat sagittal

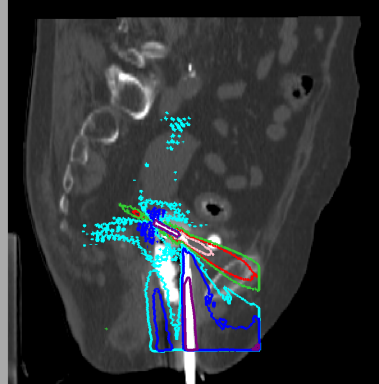

tandem sagittal

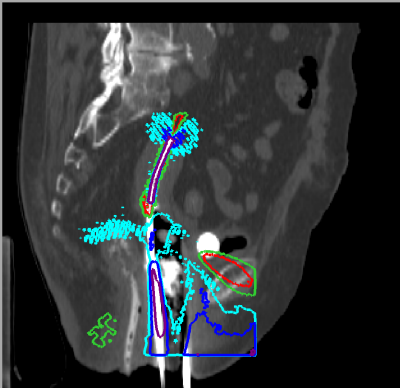

colpostats transverse

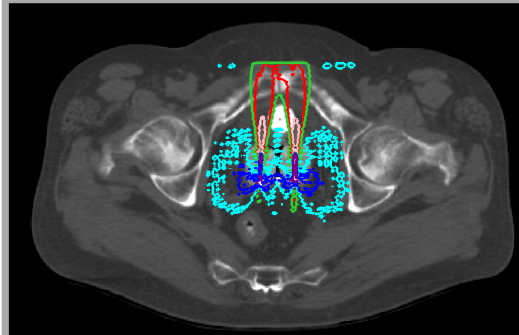

phantom least similar to TG43

D(Y,N,B,B)

D(Y,N,B,N)

D(Y,N,B,M)

D(N,N,N,N)

D(Y,N,N,N)

D(Y,N,M,M)

-->D(Y,M,X,X)<--

D(N,M,X,X)

phantom most similar to TG43

GBBS(solid model applicator, body, balloon and rectal contrast, packing contrast)



Patient\_08 D(N,M,X,X) %difference from TG43

left colpostat sagittal

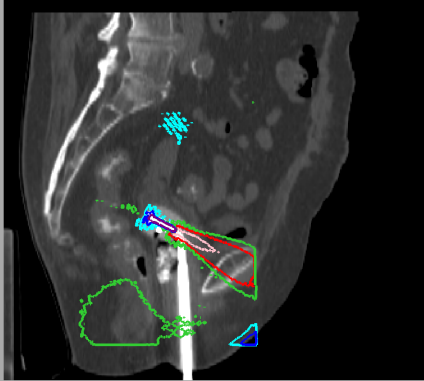

right colpostat sagittal

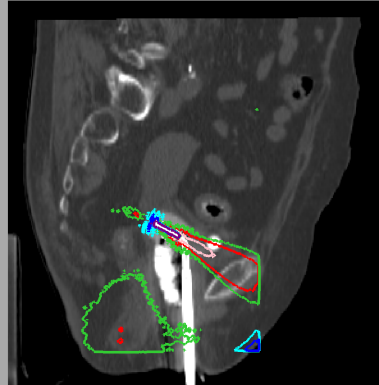

tandem sagittal

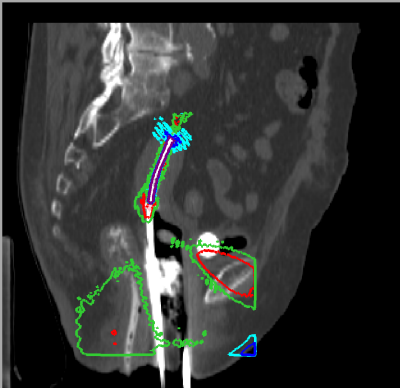

colpostats transverse

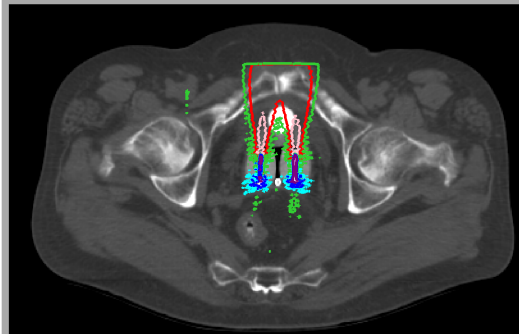

%diff from TG43



phantom least similar to TG43

D(Y,N,B,B)

D(Y,N,B,N)

D(Y,N,B,M)

D(N,N,N,N)

D(Y,N,N,N)

D(Y,N,M,M)

D(Y,M,X,X)

-->D(N,M,X,X)<--

phantom most similar to TG43

GBBS(solid model applicator, body, balloon and rectal contrast, packing contrast)

Patient\_09 D(Y,N,B,B) %difference from TG43

left colpostat sagittal

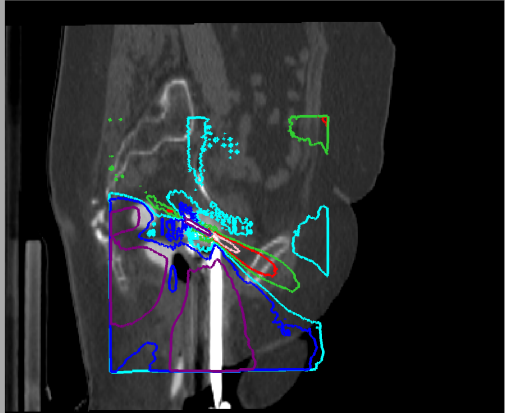

right colpostat sagittal

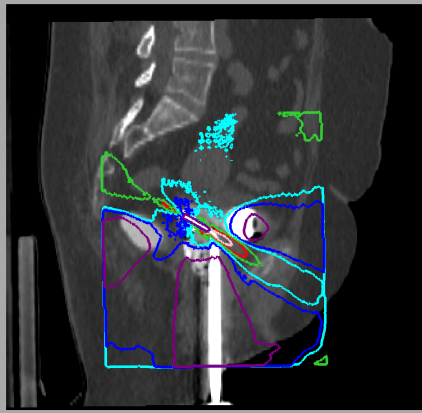

tandem sagittal

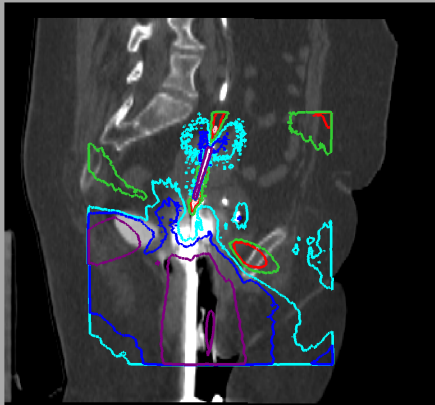

colpostats transverse

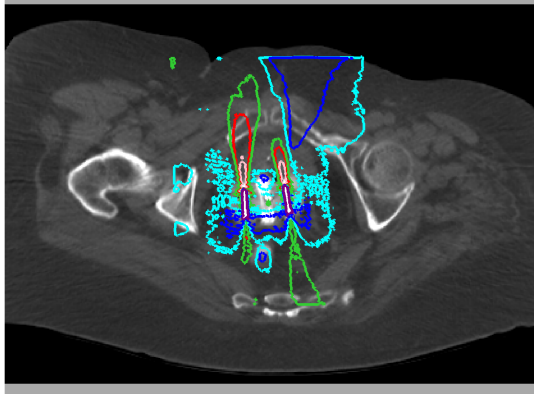

%diff from TG43



phantom least similar to TG43

-->D(Y,N,B,B)<--

D(Y,N,B,N)

D(Y,N,B,M)

D(N,N,N,N)

D(Y,N,N,N)

D(Y,N,M,M)

D(Y,M,X,X)

D(N,M,X,X)

phantom most similar to TG43

GBBS(solid model applicator, body, balloon and rectal contrast, packing contrast)

Patient\_09 D(Y,N,B,N) %difference from TG43

left colpostat sagittal

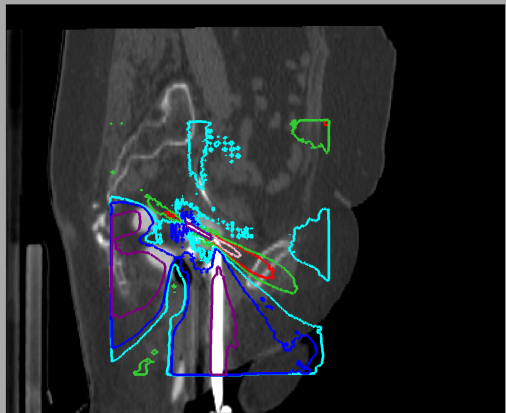

right colpostat sagittal

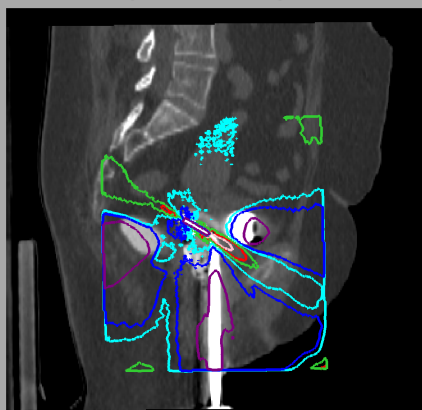

tandem sagittal

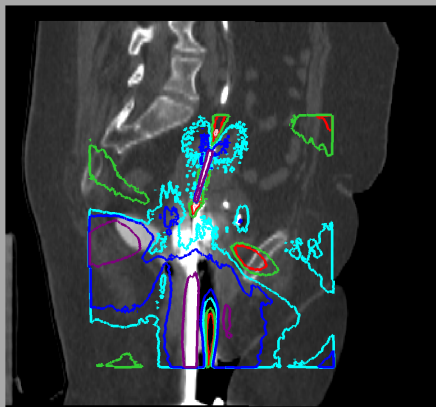

colpostats transverse

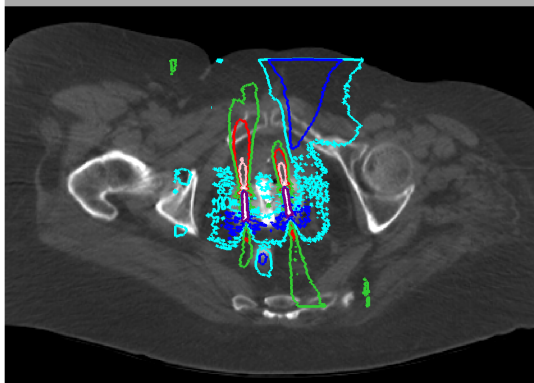

%diff from TG43



phantom least similar to TG43

D(Y,N,B,B)

-->D(Y,N,B,N)<--

D(Y,N,B,M)

D(N,N,N,N)

D(Y,N,N,N)

D(Y,N,M,M)

D(Y,M,X,X)

D(N,M,X,X)

phantom most similar to TG43

GBBS(solid model applicator, body, balloon and rectal contrast, packing contrast)

Patient\_09 D(Y,N,B,M) %difference from TG43

left colpostat sagittal

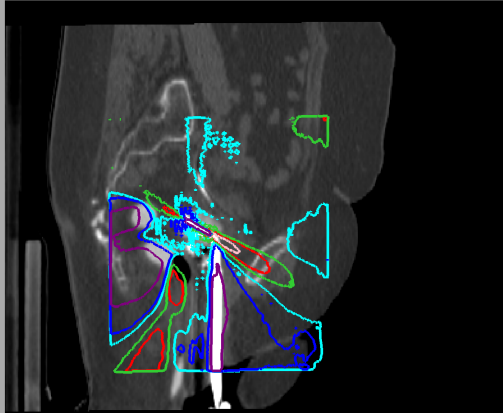

right colpostat sagittal

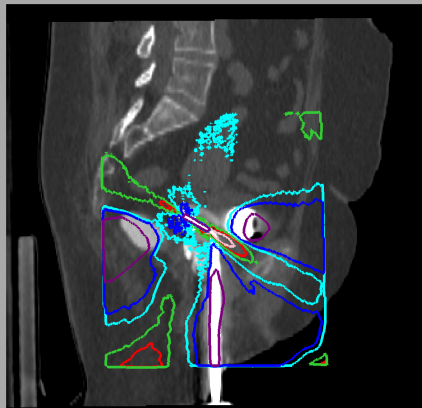

tandem sagittal

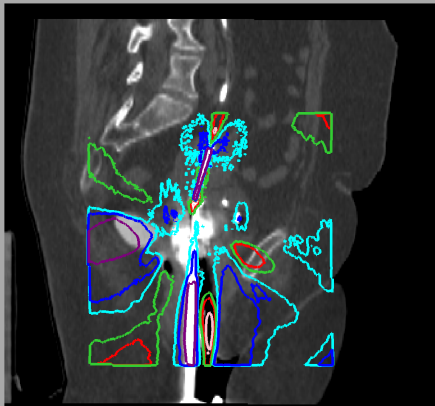

colpostats transverse

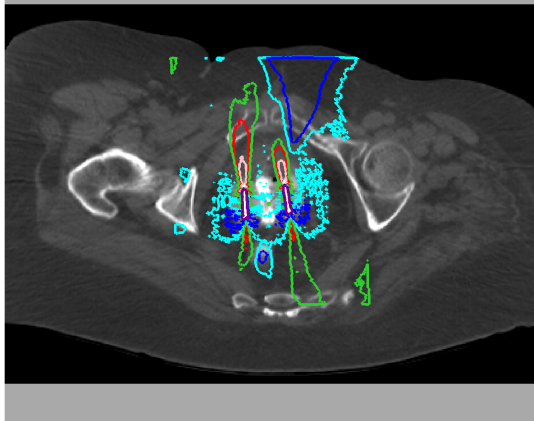

%diff from TG43



phantom least similar to TG43

D(Y,N,B,B)

D(Y,N,B,N)

-->D(Y,N,B,M)<--

D(N,N,N,N)

D(Y,N,N,N)

D(Y,N,M,M)

D(Y,M,X,X)

D(N,M,X,X)

phantom most similar to TG43

GBBS(solid model applicator, body, balloon and rectal contrast, packing contrast)

Patient\_09 D(N,N,N,N) %difference from TG43

left colpostat sagittal

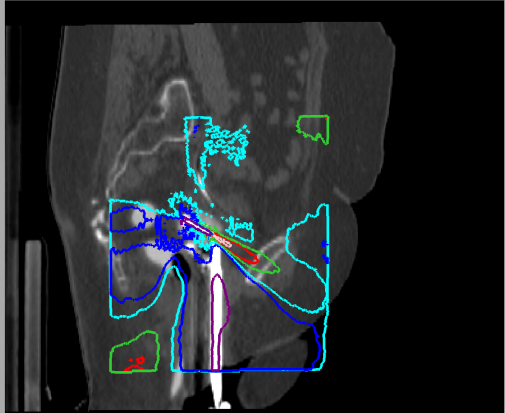

right colpostat sagittal

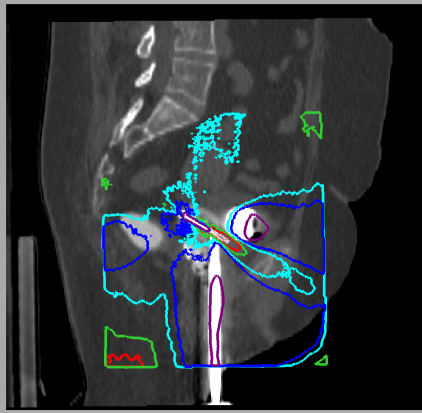

tandem sagittal

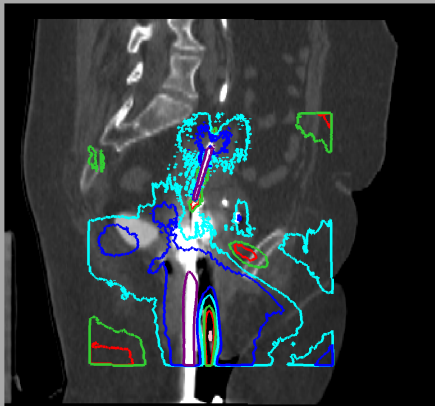

colpostats transverse

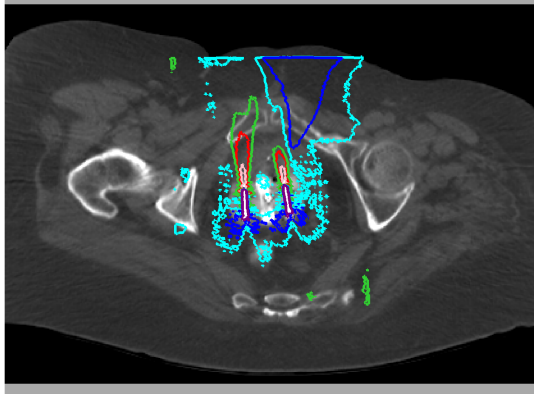

%diff from TG43



GBBS(solid model applicator, body, balloon and rectal contrast, packing contrast)

phantom least similar to TG43

D(Y,N,B,B)

D(Y,N,B,N)

D(Y,N,B,M)

-->D(N,N,N,N)<--

D(Y,N,N,N)

D(Y,N,M,M)

D(Y,M,X,X)

D(N,M,X,X)

phantom most similar to TG43

Patient\_09 D(Y,N,N,N) %difference from TG43

left colpostat sagittal

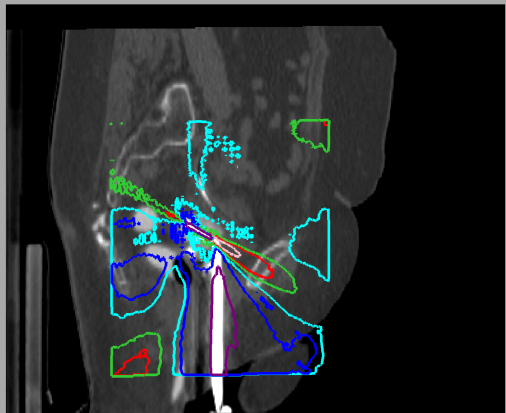

right colpostat sagittal

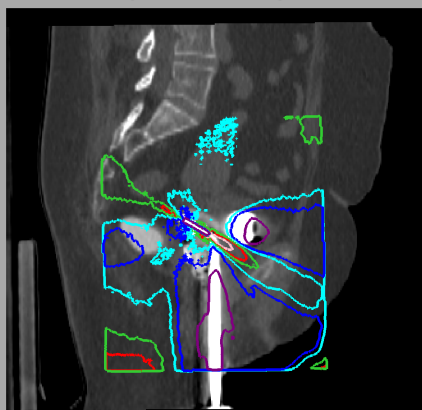

tandem sagittal

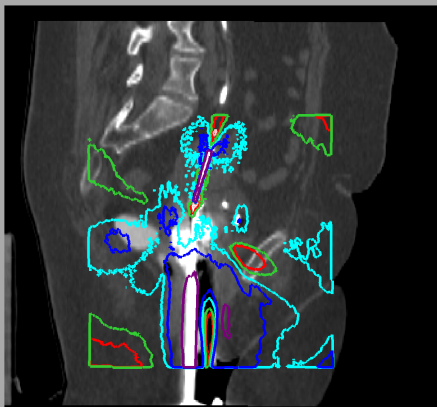

colpostats transverse

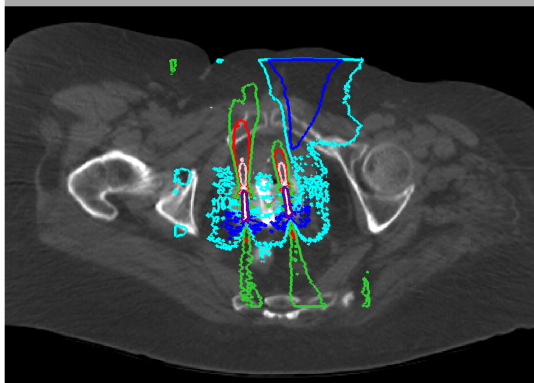

%diff from TG43



phantom least similar to TG43

D(Y,N,B,B)

D(Y,N,B,N)

D(Y,N,B,M)

D(N,N,N,N)

-->D(Y,N,N,N)<--

D(Y,N,M,M)

D(Y,M,X,X)

D(N,M,X,X)

phantom most similar to TG43

GBBS(solid model applicator, body, balloon and rectal contrast, packing contrast)

Patient\_09 D(Y,N,M,M) %difference from TG43

left colpostat sagittal

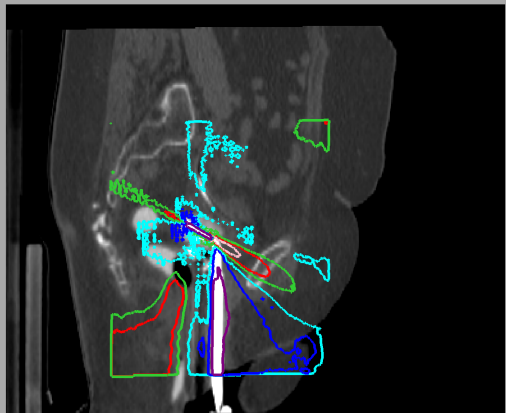

right colpostat sagittal

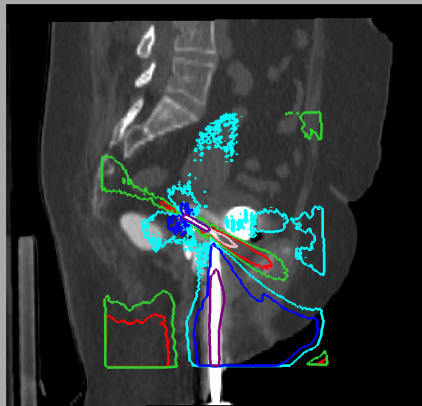

tandem sagittal

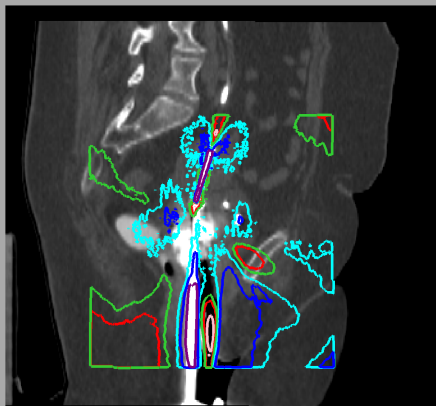

colpostats transverse

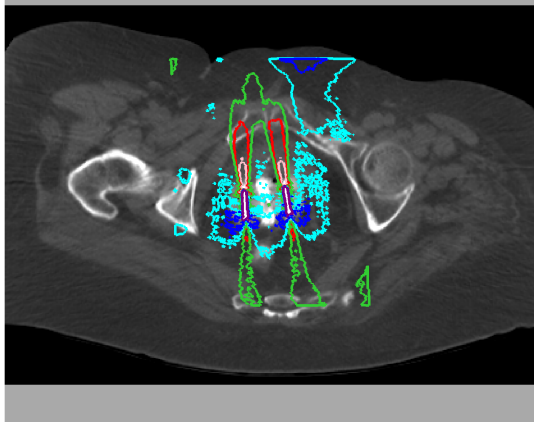

%diff from TG43

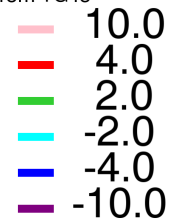

phantom least similar to TG43

D(Y,N,B,B)

D(Y,N,B,N)

D(Y,N,B,M)

D(N,N,N,N)

D(Y,N,N,N)

-->D(Y,N,M,M)<--

D(Y,M,X,X)

D(N,M,X,X)

phantom most similar to TG43

GBBS(solid model applicator, body, balloon and rectal contrast, packing contrast)

Patient\_09 D(Y,M,X,X) %difference from TG43

left colpostat sagittal

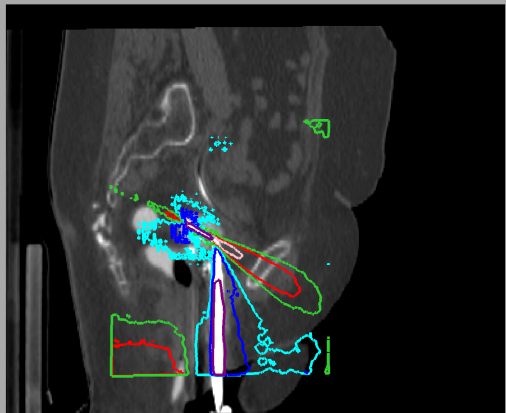

right colpostat sagittal

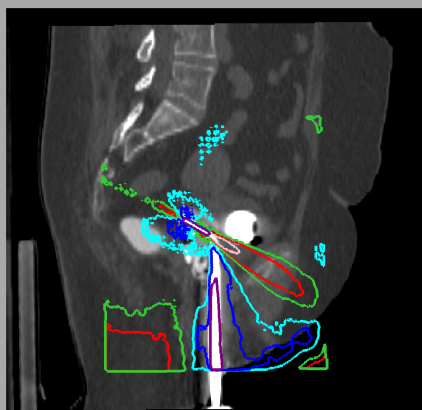

tandem sagittal

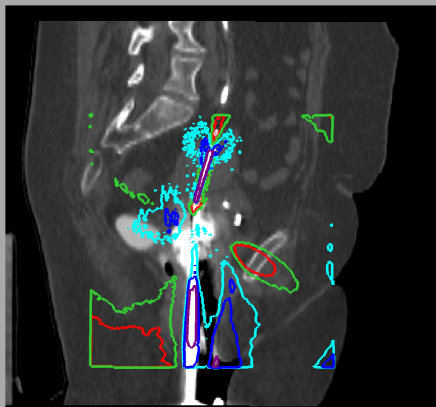

colpostats transverse

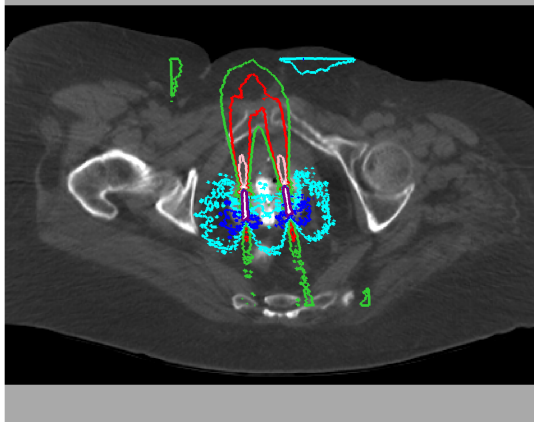

%diff from TG43



phantom least similar to TG43

D(Y,N,B,B)

D(Y,N,B,N)

D(Y,N,B,M)

D(N,N,N,N)

D(Y,N,N,N)

D(Y,N,M,M)

-->D(Y,M,X,X)<--

D(N,M,X,X)

phantom most similar to TG43

GBBS(solid model applicator, body, balloon and rectal contrast, packing contrast)



Patient\_09 D(N,M,X,X) %difference from TG43

left colpostat sagittal

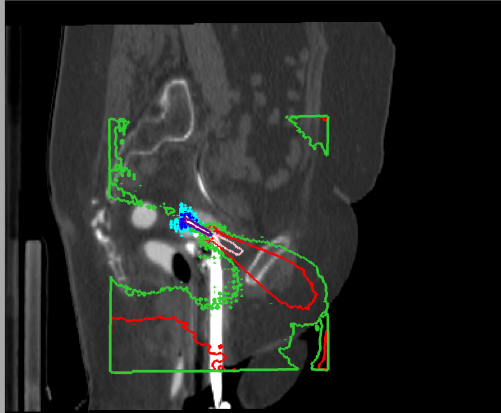

right colpostat sagittal

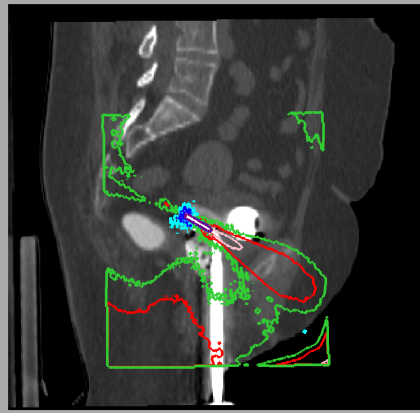

tandem sagittal

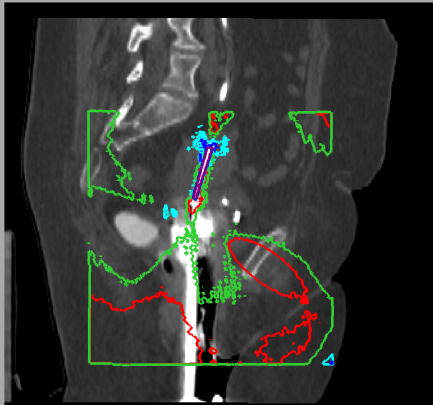

colpostats transverse

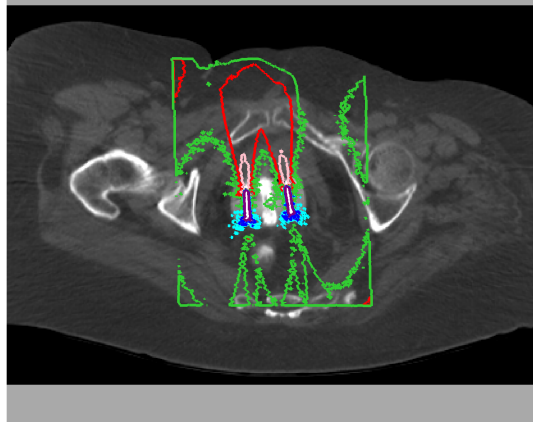

phantom least similar to TG43

D(Y,N,B,B)

D(Y,N,B,N)

D(Y,N,B,M)

D(N,N,N,N)

D(Y,N,N,N)

D(Y,N,M,M)

D(Y,M,X,X)

-->D(N,M,X,X)<--

phantom most similar to TG43

GBBS(solid model applicator, body, balloon and rectal contrast, packing contrast)

Patient\_10 D(Y,N,B,B) %difference from TG43

left colpostat sagittal

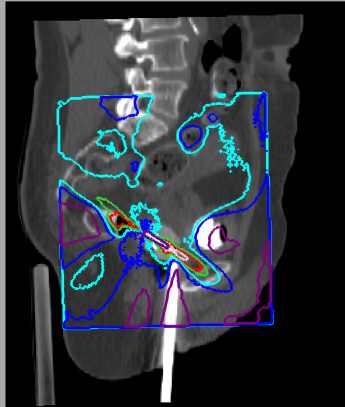

right colpostat sagittal

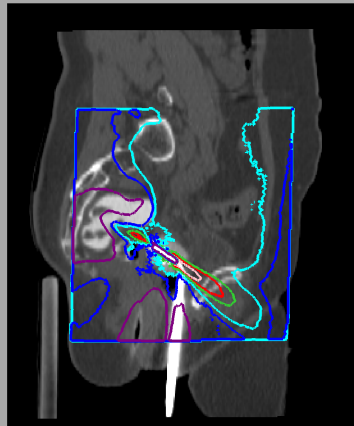

tandem sagittal

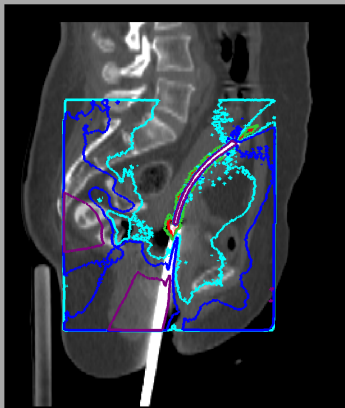

colpostats transverse

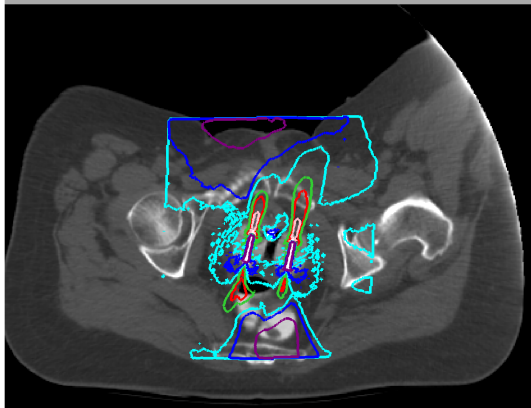

%diff from TG43



phantom least similar to TG43

-->D(Y,N,B,B)<--

D(Y,N,B,N)

D(Y,N,B,M)

D(N,N,N,N)

D(Y,N,N,N)

D(Y,N,M,M)

D(Y,M,X,X)

D(N,M,X,X)

phantom most similar to TG43

GBBS(solid model applicator, body, balloon and rectal contrast, packing contrast)

Patient\_10 D(Y,N,B,N) %difference from TG43

left colpostat sagittal

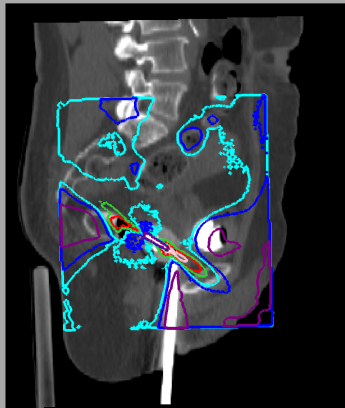

right colpostat sagittal

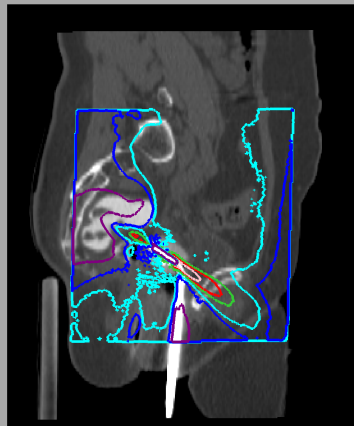

tandem sagittal

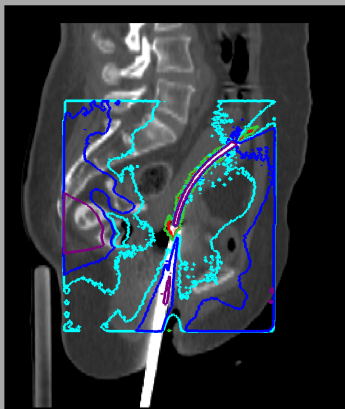

colpostats transverse

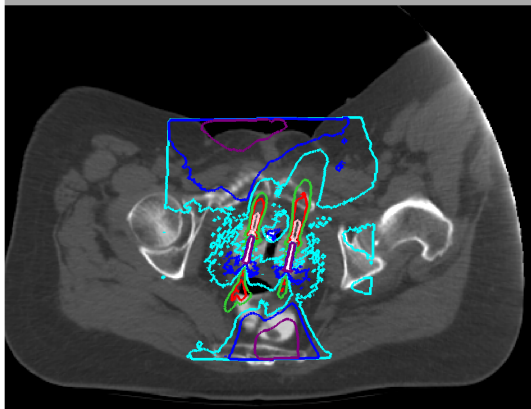

%diff from TG43

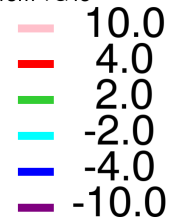

phantom least similar to TG43

D(Y,N,B,B)

-->D(Y,N,B,N)<--

D(Y,N,B,M)

D(N,N,N,N)

D(Y,N,N,N)

D(Y,N,M,M)

D(Y,M,X,X)

D(N,M,X,X)

phantom most similar to TG43

GBBS(solid model applicator, body, balloon and rectal contrast, packing contrast)

Patient\_10 D(Y,N,B,M) %difference from TG43

left colpostat sagittal

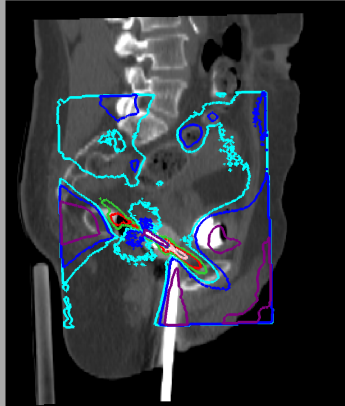

right colpostat sagittal

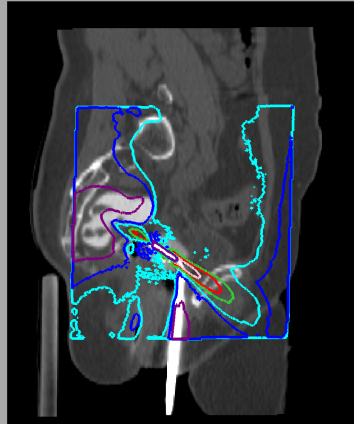

tandem sagittal

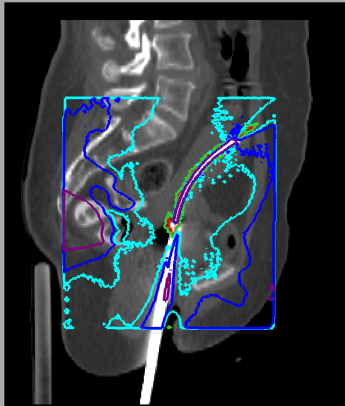

colpostats transverse

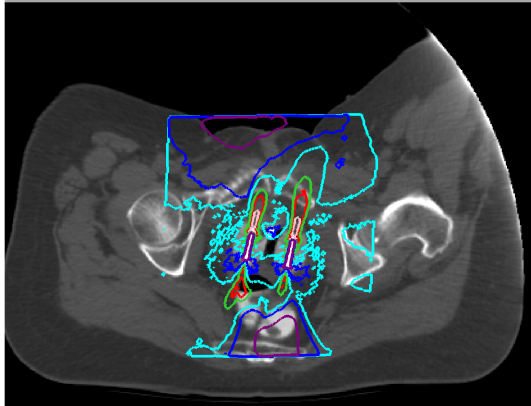

phantom least similar to TG43

D(Y,N,B,B)

D(Y,N,B,N)

-->D(Y,N,B,M)<--

D(N,N,N,N)

D(Y,N,N,N)

D(Y,N,M,M)

D(Y,M,X,X)

D(N,M,X,X)

phantom most similar to TG43

GBBS(solid model applicator, body, balloon and rectal contrast, packing contrast)

Patient\_10 D(N,N,N,N) %difference from TG43

left colpostat sagittal

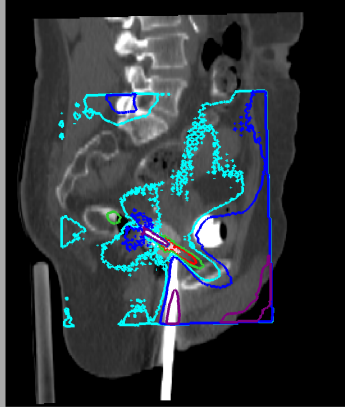

right colpostat sagittal

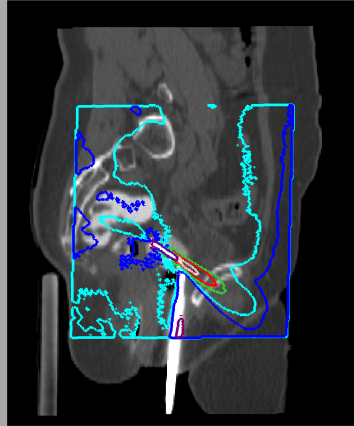

tandem sagittal

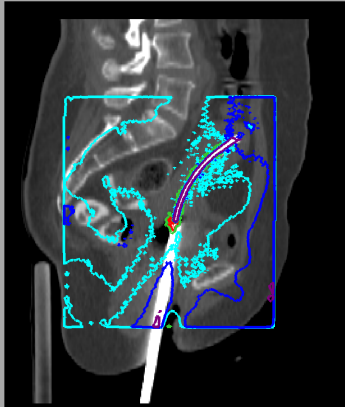

colpostats transverse

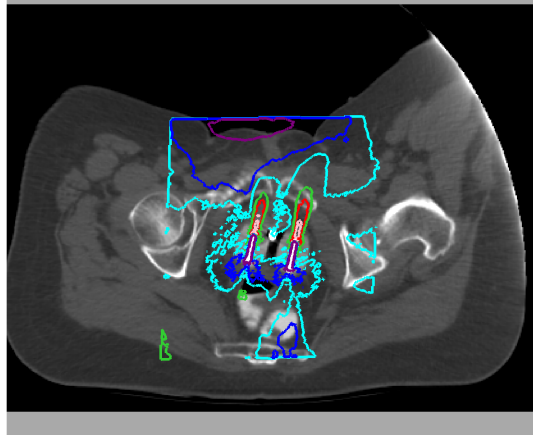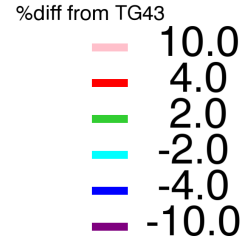

phantom least similar to TG43

D(Y,N,B,B)

D(Y,N,B,N)

D(Y,N,B,M)

-->D(N,N,N,N)<--

D(Y,N,N,N)

D(Y,N,M,M)

D(Y,M,X,X)

D(N,M,X,X)

phantom most similar to TG43

GBBS(solid model applicator, body, balloon and rectal contrast, packing contrast)

Patient\_10 D(Y,N,N,N) %difference from TG43

left colpostat sagittal

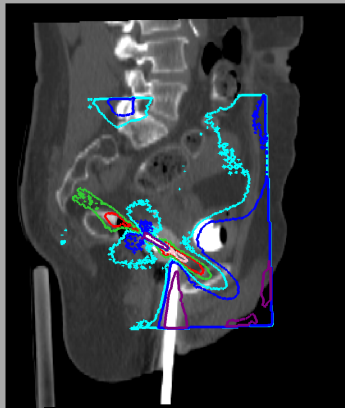

right colpostat sagittal

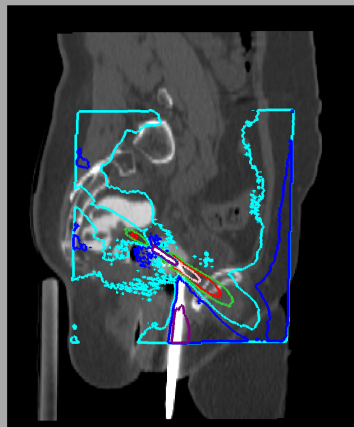

tandem sagittal

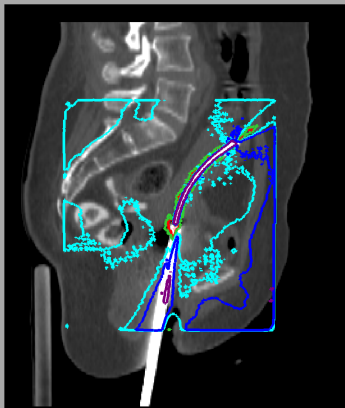

colpostats transverse

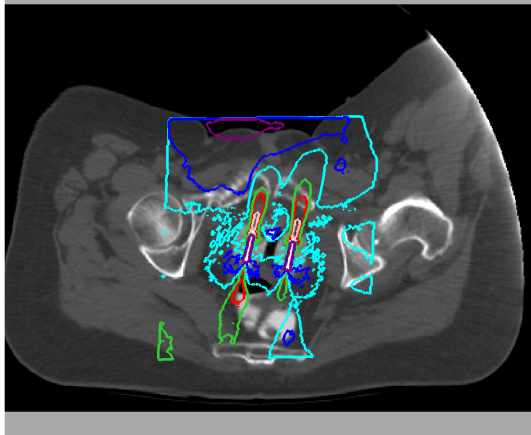

%diff from TG43



phantom least similar to TG43

D(Y,N,B,B)

D(Y,N,B,N)

D(Y,N,B,M)

D(N,N,N,N)

-->D(Y,N,N,N)<--

D(Y,N,M,M)

D(Y,M,X,X)

D(N,M,X,X)

phantom most similar to TG43

GBBS(solid model applicator, body, balloon and rectal contrast, packing contrast)

Patient\_10 D(Y,N,M,M) %difference from TG43

left colpostat sagittal

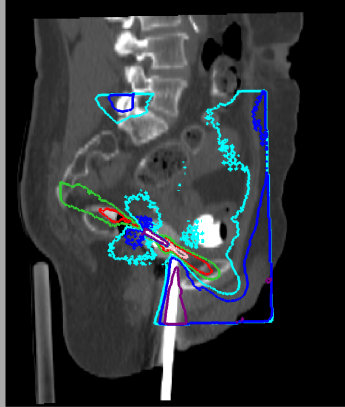

right colpostat sagittal

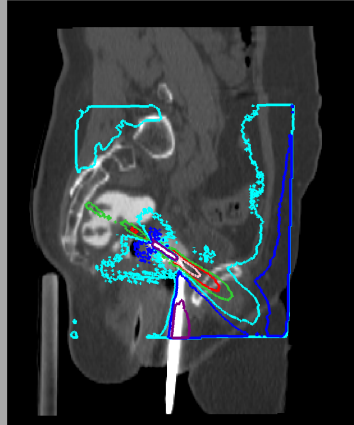

tandem sagittal

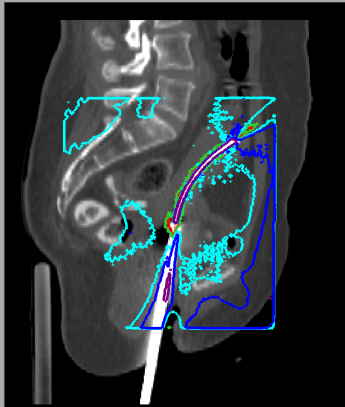

colpostats transverse

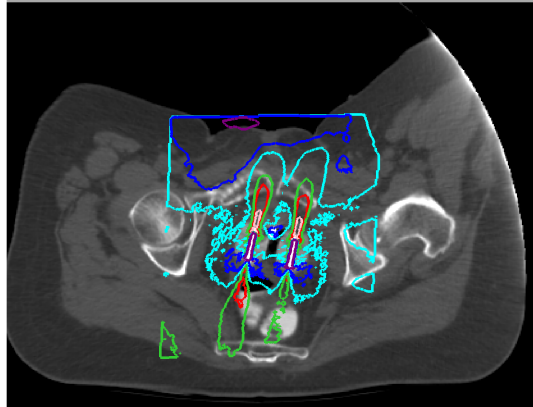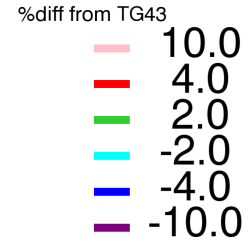

phantom least similar to TG43

D(Y,N,B,B)

D(Y,N,B,N)

D(Y,N,B,M)

D(N,N,N,N)

D(Y,N,N,N)

-->D(Y,N,M,M)<--

D(Y,M,X,X)

D(N,M,X,X)

phantom most similar to TG43

GBBS(solid model applicator, body, balloon and rectal contrast, packing contrast)

Patient\_10 D(Y,M,X,X) %difference from TG43

left colpostat sagittal

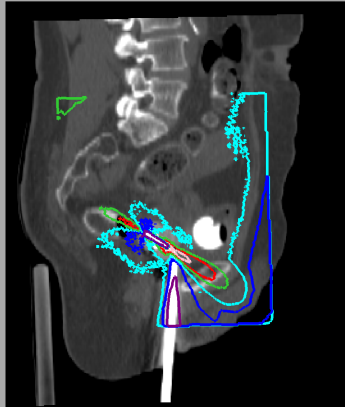

right colpostat sagittal

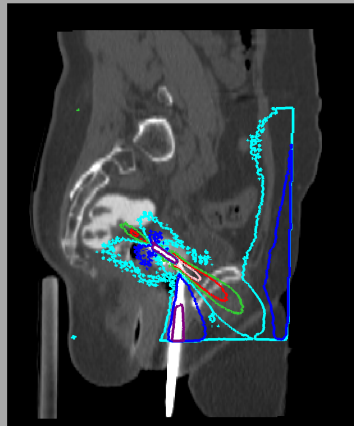

tandem sagittal

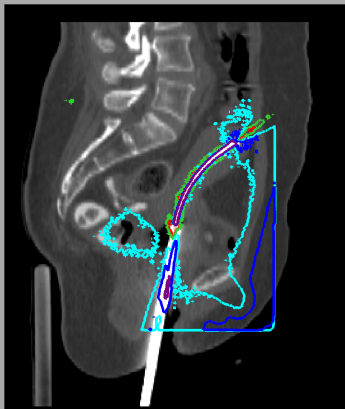

colpostats transverse

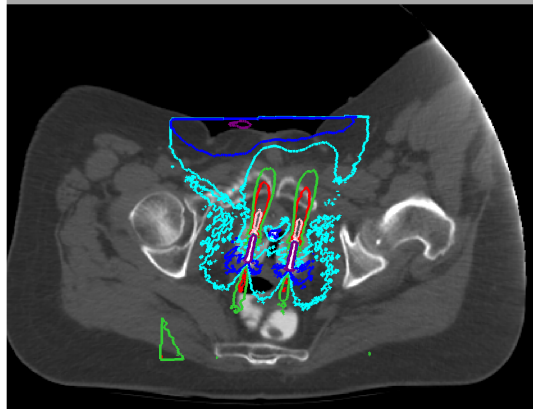

%diff from TG43



phantom least similar to TG43

D(Y,N,B,B)

D(Y,N,B,N)

D(Y,N,B,M)

D(N,N,N,N)

D(Y,N,N,N)

D(Y,N,M,M)

-->D(Y,M,X,X)<--

D(N,M,X,X)

phantom most similar to TG43

GBBS(solid model applicator, body, balloon and rectal contrast, packing contrast)



Patient\_10 D(N,M,X,X) %difference from TG43

left colpostat sagittal

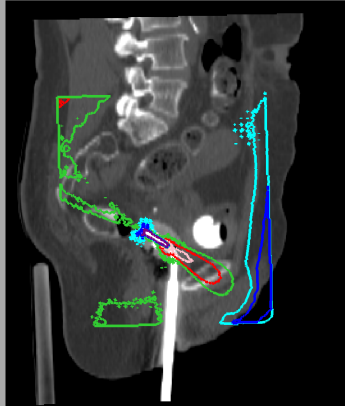

right colpostat sagittal

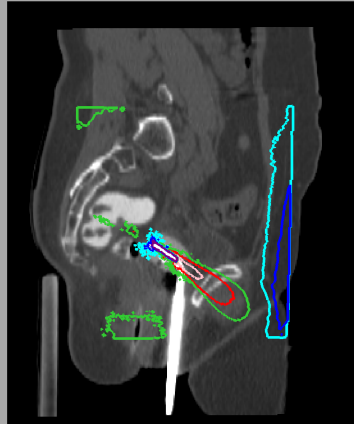

tandem sagittal

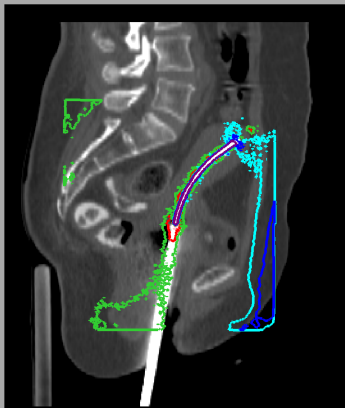

colpostats transverse

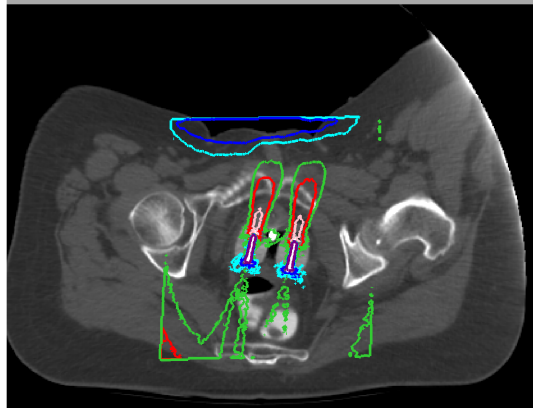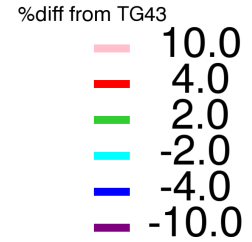

phantom least similar to TG43

D(Y,N,B,B)

D(Y,N,B,N)

D(Y,N,B,M)

D(N,N,N,N)

D(Y,N,N,N)

D(Y,N,M,M)

D(Y,M,X,X)

-->D(N,M,X,X)<--

phantom most similar to TG43

GBBS(solid model applicator, body, balloon and rectal contrast, packing contrast)

Patient\_11 D(Y,N,B,B) %difference from TG43

left colpostat sagittal

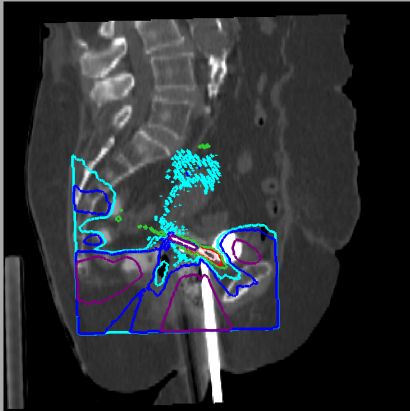

right colpostat sagittal

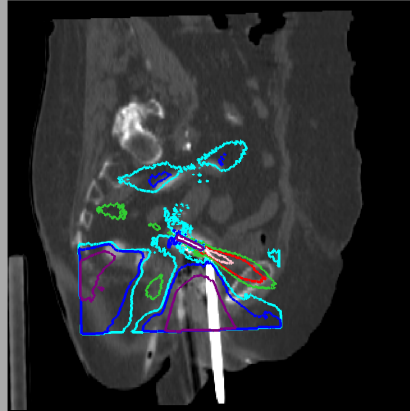

tandem sagittal

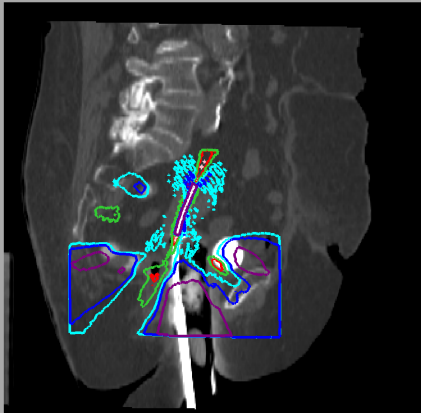

colpostats transverse

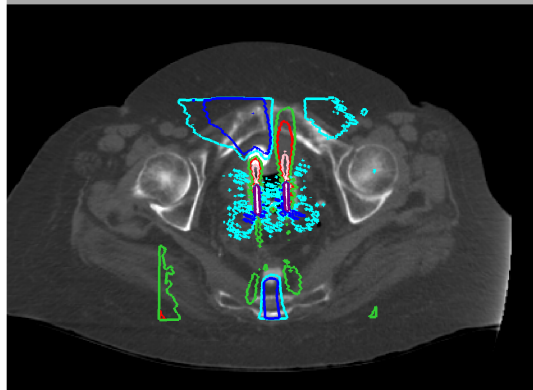

phantom least similar to TG43

-->D(Y,N,B,B)<--

D(Y,N,B,N)

D(Y,N,B,M)

D(N,N,N,N)

D(Y,N,N,N)

D(Y,N,M,M)

D(Y,M,X,X)

D(N,M,X,X)

phantom most similar to TG43

GBBS(solid model applicator, body, balloon and rectal contrast, packing contrast)

Patient\_11 D(Y,N,B,N) %difference from TG43

left colpostat sagittal

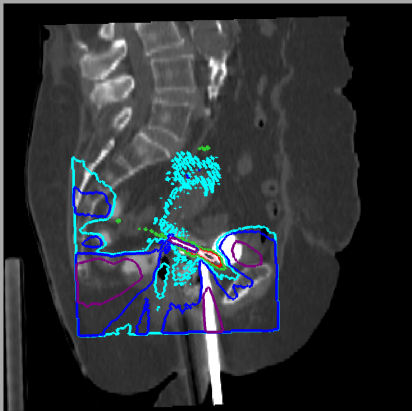

right colpostat sagittal

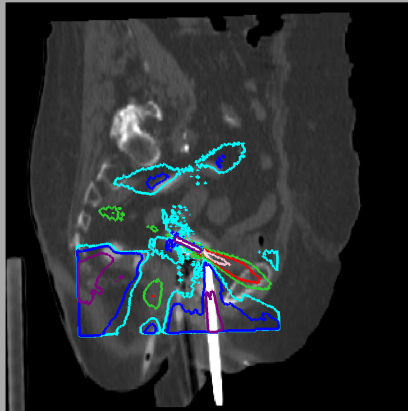

tandem sagittal

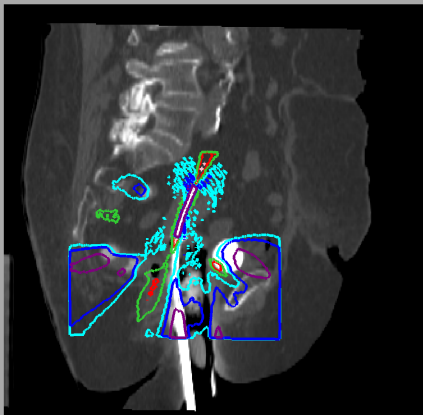

colpostats transverse

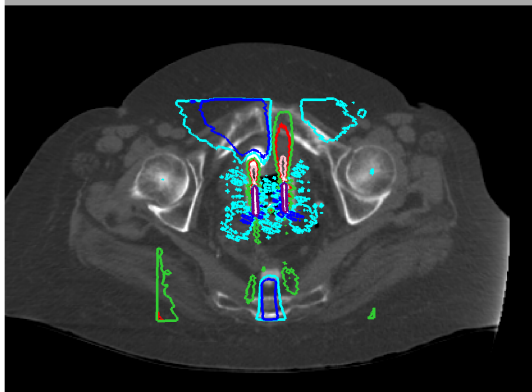

%diff from TG43



phantom least similar to TG43

D(Y,N,B,B)

-->D(Y,N,B,N)<--

D(Y,N,B,M)

D(N,N,N,N)

D(Y,N,N,N)

D(Y,N,M,M)

D(Y,M,X,X)

D(N,M,X,X)

phantom most similar to TG43

GBBS(solid model applicator, body, balloon and rectal contrast, packing contrast)

Patient\_11 D(Y,N,B,M) %difference from TG43

left colpostat sagittal

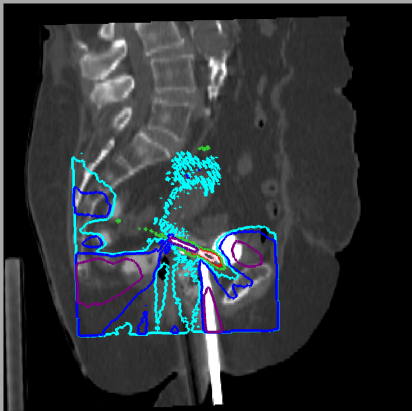

right colpostat sagittal

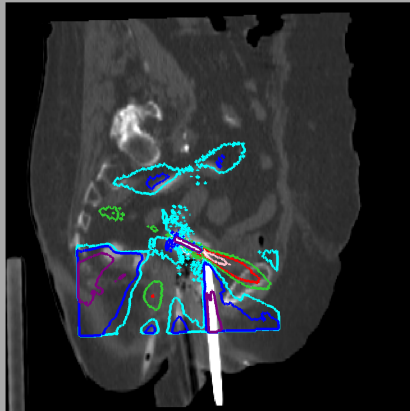

tandem sagittal

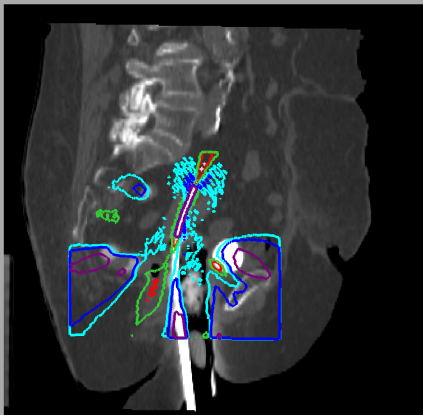

colpostats transverse

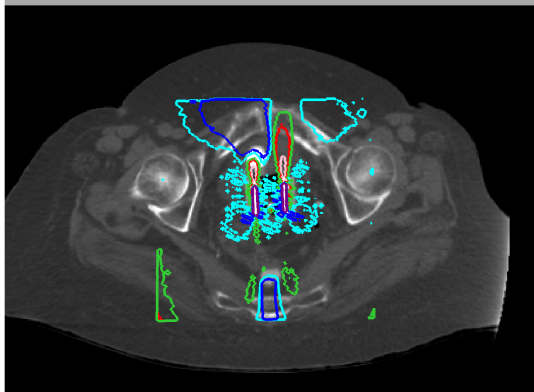

%diff from TG43

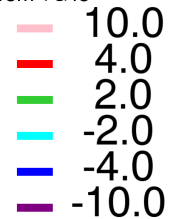

phantom least similar to TG43

D(Y,N,B,B)

D(Y,N,B,N)

-->D(Y,N,B,M)<--

D(N,N,N,N)

D(Y,N,N,N)

D(Y,N,M,M)

D(Y,M,X,X)

D(N,M,X,X)

phantom most similar to TG43

GBBS(solid model applicator, body, balloon and rectal contrast, packing contrast)

Patient\_11 D(N,N,N,N) %difference from TG43

left colpostat sagittal

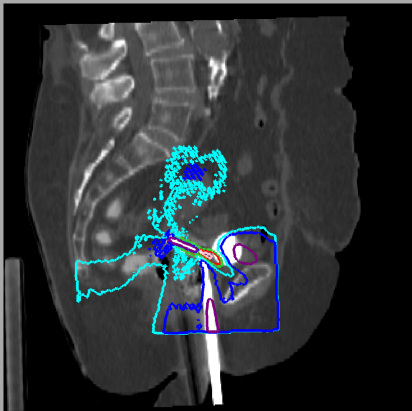

right colpostat sagittal

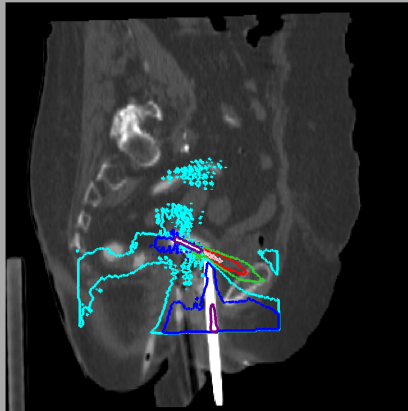

tandem sagittal

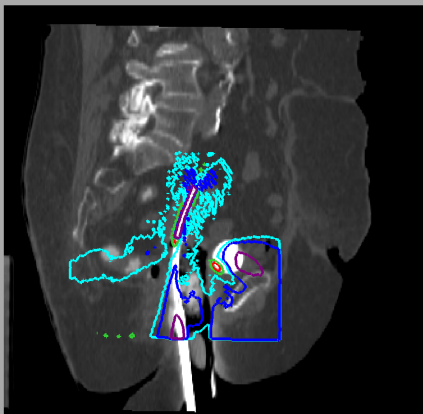

colpostats transverse

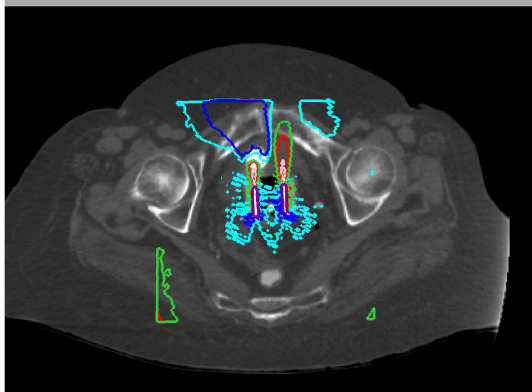

%diff from TG43



phantom least similar to TG43

D(Y,N,B,B)

D(Y,N,B,N)

D(Y,N,B,M)

-->D(N,N,N,N)<--

D(Y,N,N,N)

D(Y,N,M,M)

D(Y,M,X,X)

D(N,M,X,X)

phantom most similar to TG43

GBBS(solid model applicator, body, balloon and rectal contrast, packing contrast)

Patient\_11 D(Y,N,N,N) %difference from TG43

left colpostat sagittal

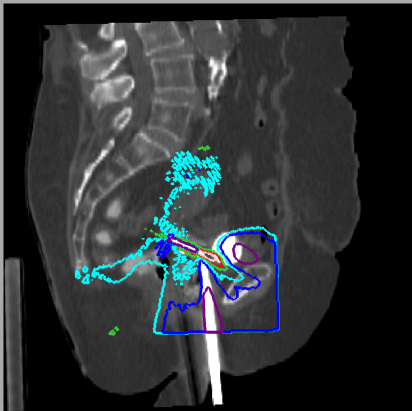

right colpostat sagittal

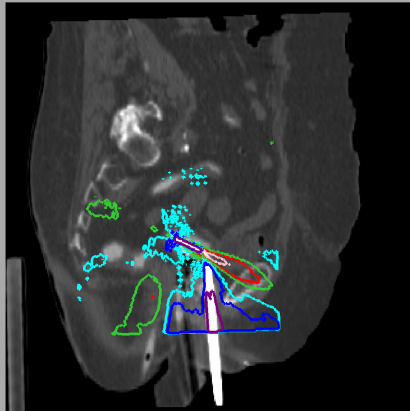

tandem sagittal

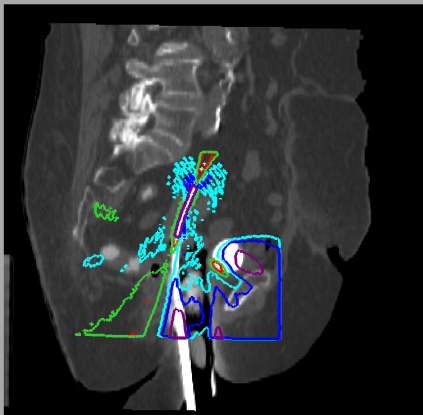

colpostats transverse

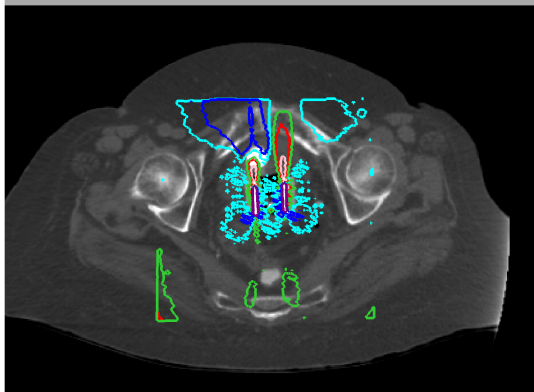

%diff from TG43

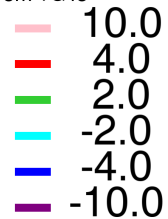

phantom least similar to TG43

D(Y,N,B,B)

D(Y,N,B,N)

D(Y,N,B,M)

D(N,N,N,N)

-->D(Y,N,N,N)<--

D(Y,N,M,M)

D(Y,M,X,X)

D(N,M,X,X)

phantom most similar to TG43

GBBS(solid model applicator, body, balloon and rectal contrast, packing contrast)

Patient\_11 D(Y,N,M,M) %difference from TG43

left colpostat sagittal

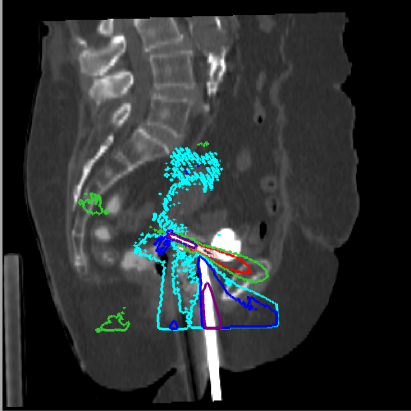

right colpostat sagittal

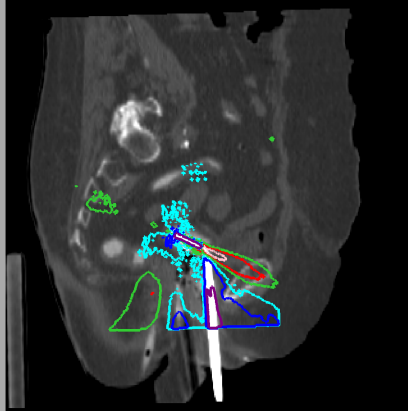

tandem sagittal

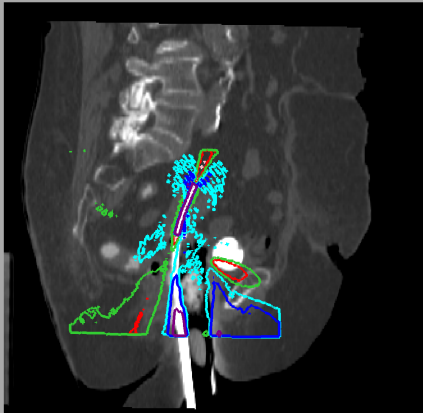

colpostats transverse

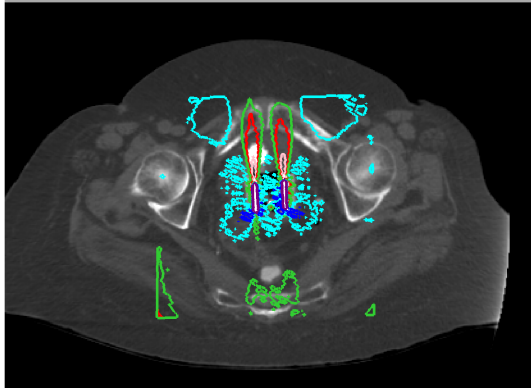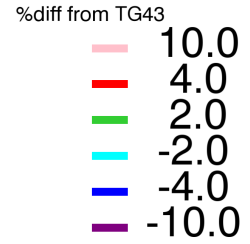

phantom least similar to TG43

D(Y,N,B,B)

D(Y,N,B,N)

D(Y,N,B,M)

D(N,N,N,N)

D(Y,N,N,N)

-->D(Y,N,M,M)<--

D(Y,M,X,X)

D(N,M,X,X)

phantom most similar to TG43

GBBS(solid model applicator, body, balloon and rectal contrast, packing contrast)

Patient\_11 D(Y,M,X,X) %difference from TG43

left colpostat sagittal

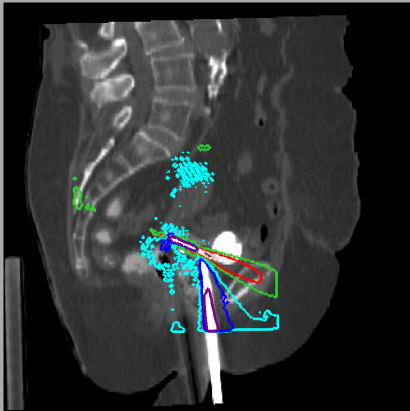

right colpostat sagittal

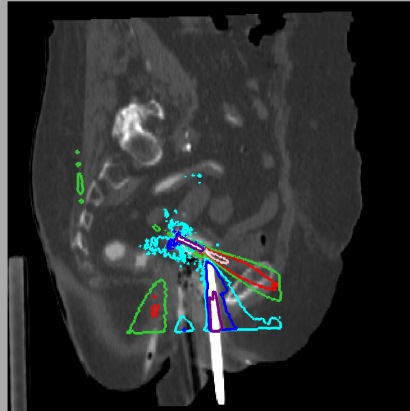

tandem sagittal

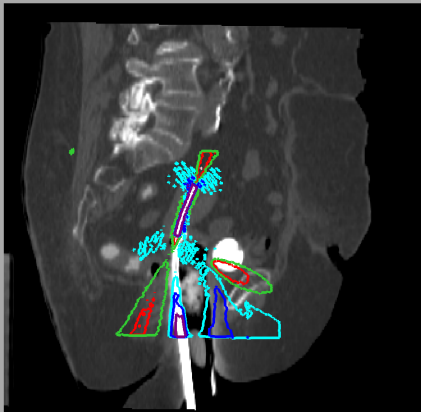

colpostats transverse

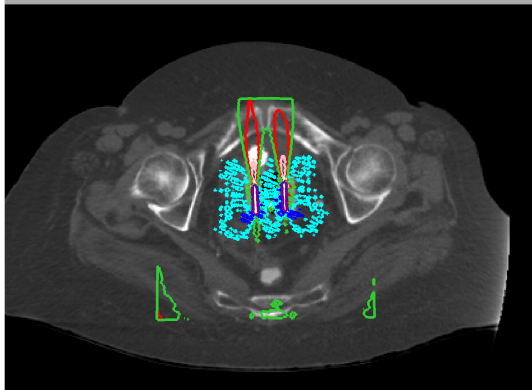

%diff from TG43



phantom least similar to TG43

D(Y,N,B,B)

D(Y,N,B,N)

D(Y,N,B,M)

D(N,N,N,N)

D(Y,N,N,N)

D(Y,N,M,M)

-->D(Y,M,X,X)<--

D(N,M,X,X)

phantom most similar to TG43

GBBS(solid model applicator, body, balloon and rectal contrast, packing contrast)



Patient\_11 D(N,M,X,X) %difference from TG43

left colpostat sagittal

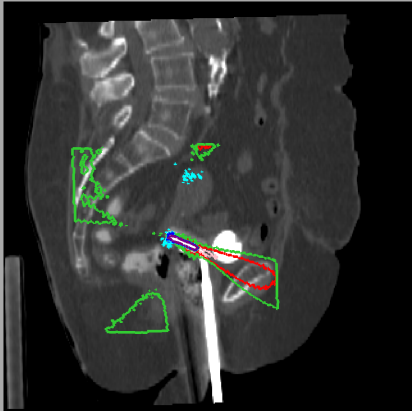

right colpostat sagittal

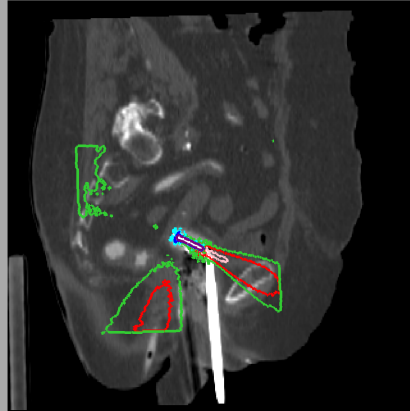

tandem sagittal

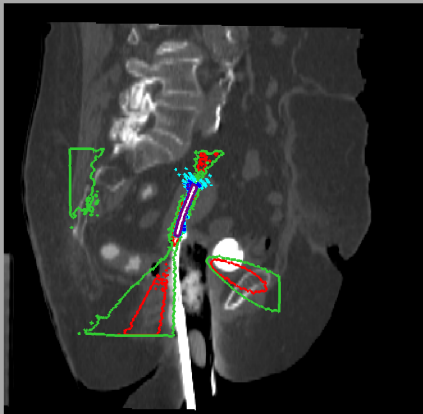

colpostats transverse

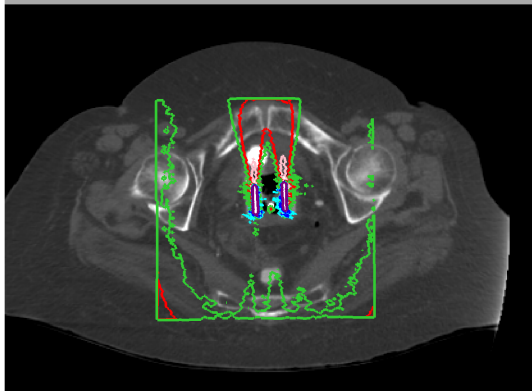

%diff from TG43



phantom least similar to TG43

D(Y,N,B,B)

D(Y,N,B,N)

D(Y,N,B,M)

D(N,N,N,N)

D(Y,N,N,N)

D(Y,N,M,M)

D(Y,M,X,X)

-->D(N,M,X,X)<--

phantom most similar to TG43

GBBS(solid model applicator, body, balloon and rectal contrast, packing contrast)

Patient\_12 D(Y,N,B,B) %difference from TG43

\*\*entire rectum overridden\*\*

left colpostat sagittal

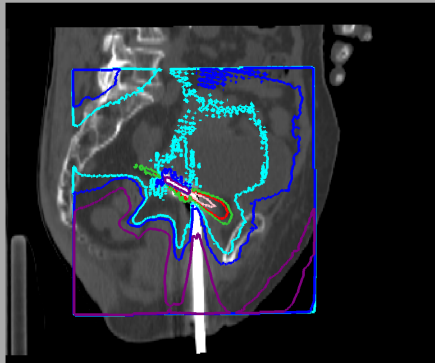

right colpostat sagittal

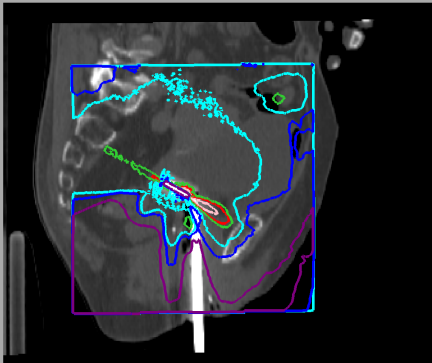

tandem sagittal

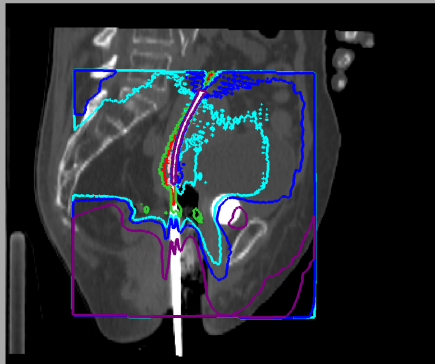

colpostats transverse

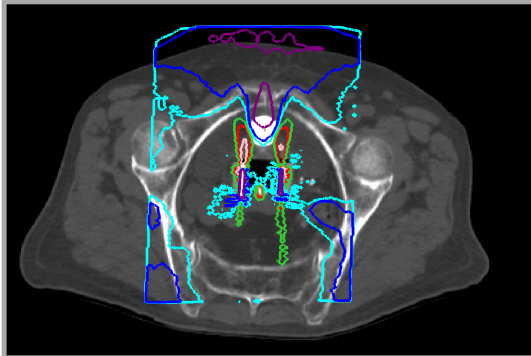

%diff from TG43



phantom least similar to TG43

-->D(Y,N,B,B)<--

D(Y,N,B,N)

D(Y,N,B,M)

D(N,N,N,N)

D(Y,N,N,N)

D(Y,N,M,M)

D(Y,M,X,X)

D(N,M,X,X)

phantom most similar to TG43

GBBS(solid model applicator, body, balloon and rectal contrast, packing contrast)

Patient\_12 D(Y,N,B,N) %difference from TG43

\*\*entire rectum overridden\*\*

left colpostat sagittal

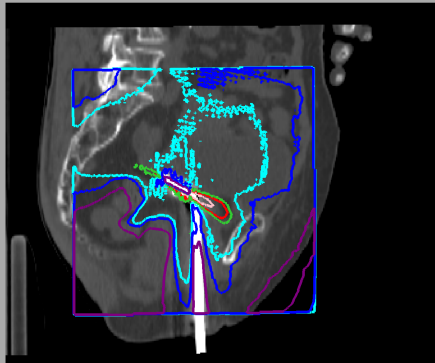

right colpostat sagittal

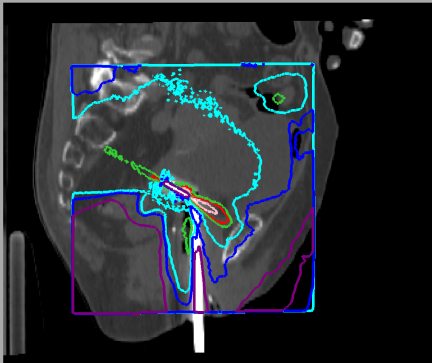

tandem sagittal

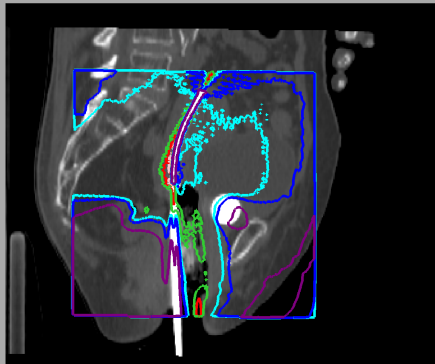

colpostats transverse

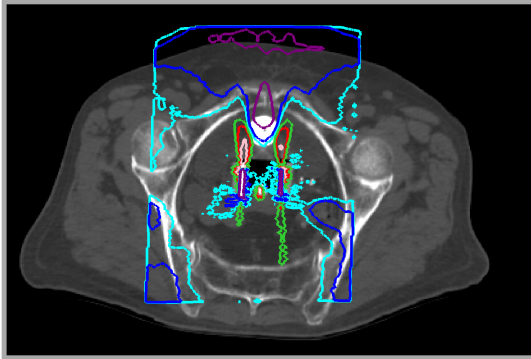

%diff from TG43



phantom least similar to TG43

D(Y,N,B,B)

-->D(Y,N,B,N)<--

D(Y,N,B,M)

D(N,N,N,N)

D(Y,N,N,N)

D(Y,N,M,M)

D(Y,M,X,X)

D(N,M,X,X)

phantom most similar to TG43

GBBS(solid model applicator, body, balloon and rectal contrast, packing contrast)

Patient\_12 D(Y,N,B,M) %difference from TG43

\*\*entire rectum overridden\*\*

left colpostat sagittal

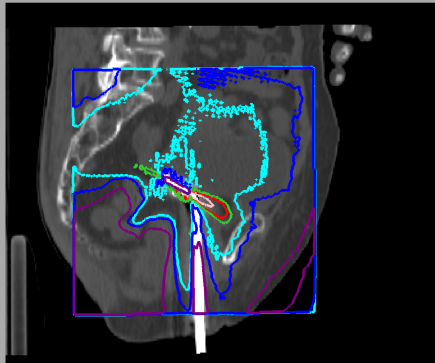

right colpostat sagittal

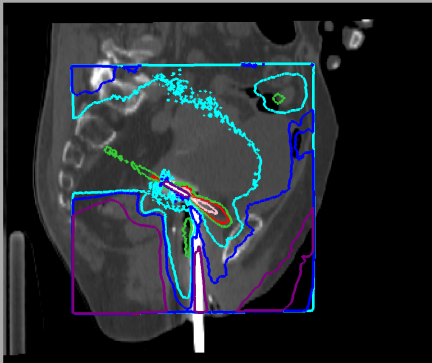

tandem sagittal

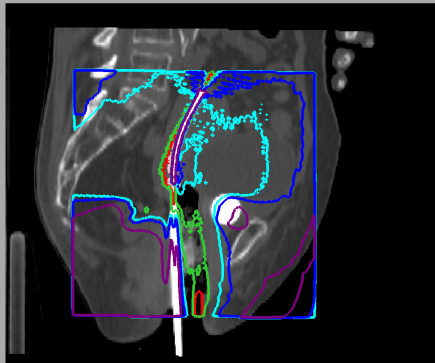

colpostats transverse

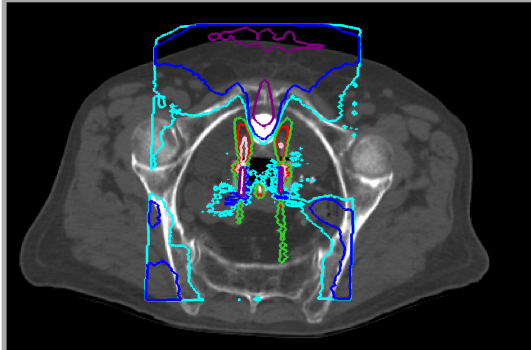

phantom least similar to TG43

D(Y,N,B,B)

D(Y,N,B,N)

-->D(Y,N,B,M)<--

D(N,N,N,N)

D(Y,N,N,N)

D(Y,N,M,M)

D(Y,M,X,X)

D(N,M,X,X)

phantom most similar to TG43

GBBS(solid model applicator, body, balloon and rectal contrast, packing contrast)

Patient\_12 D(N,N,N,N) %difference from TG43

\*\*entire rectum overridden\*\*

left colpostat sagittal

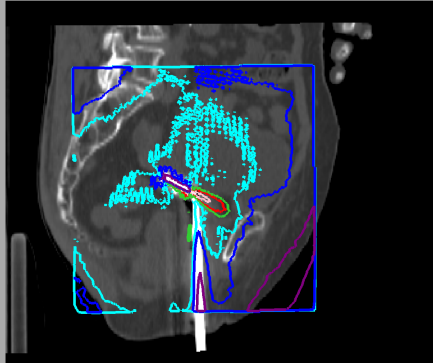

right colpostat sagittal

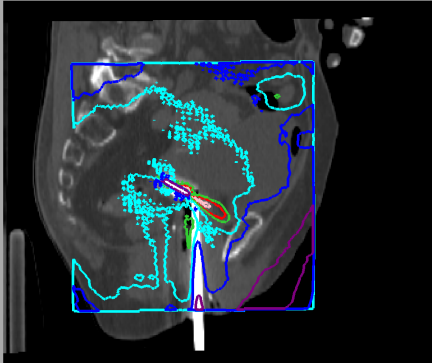

tandem sagittal

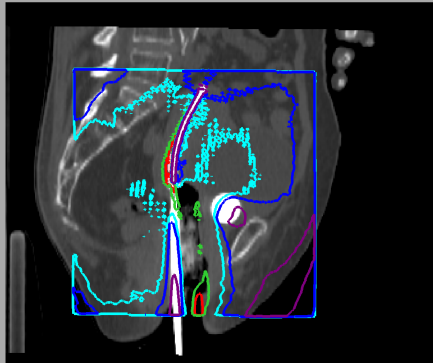

colpostats transverse

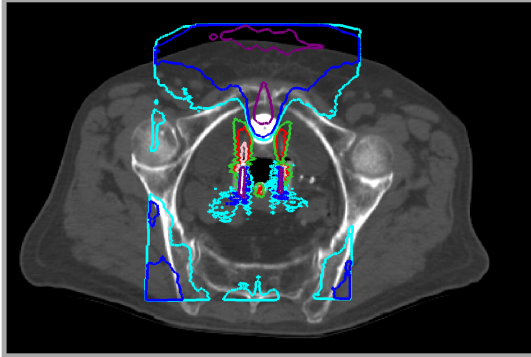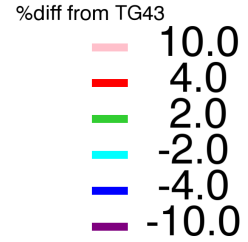

phantom least similar to TG43

D(Y,N,B,B)

D(Y,N,B,N)

D(Y,N,B,M)

-->D(N,N,N,N)<--

D(Y,N,N,N)

D(Y,N,M,M)

D(Y,M,X,X)

D(N,M,X,X)

phantom most similar to TG43

GBBS(solid model applicator, body, balloon and rectal contrast, packing contrast)

Patient\_12 D(Y,N,N,N) %difference from TG43

\*\*entire rectum overridden\*\*

left colpostat sagittal

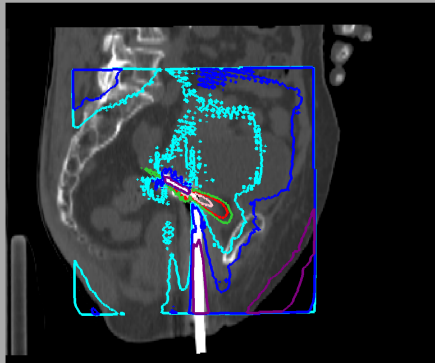

right colpostat sagittal

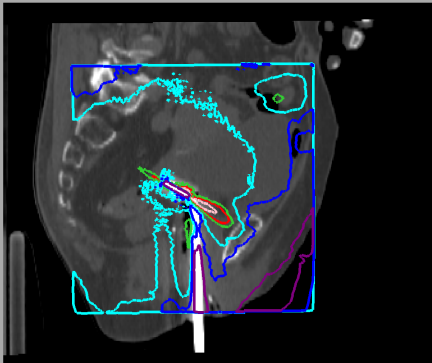

tandem sagittal

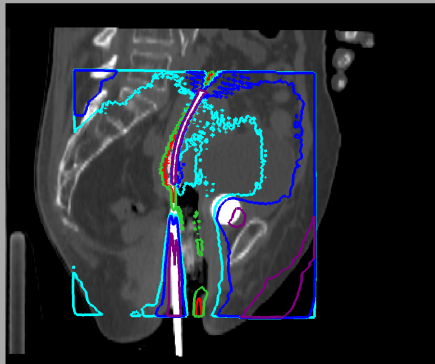

colpostats transverse

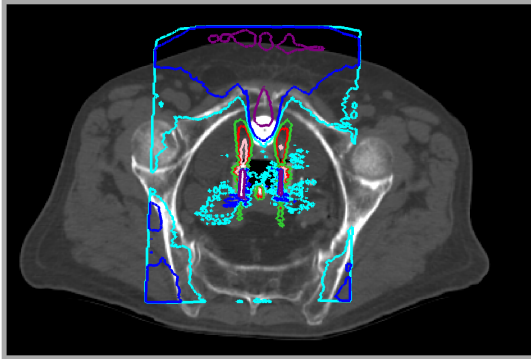

%diff from TG43



phantom least similar to TG43

D(Y,N,B,B)

D(Y,N,B,N)

D(Y,N,B,M)

D(N,N,N,N)

-->D(Y,N,N,N)<--

D(Y,N,M,M)

D(Y,M,X,X)

D(N,M,X,X)

phantom most similar to TG43

GBBS(solid model applicator, body, balloon and rectal contrast, packing contrast)

Patient\_12 D(Y,N,M,M) %difference from TG43

\*\*entire rectum overridden\*\*

left colpostat sagittal

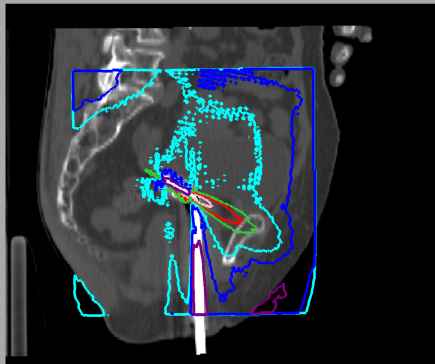

right colpostat sagittal

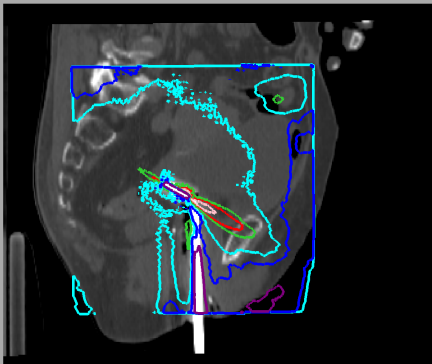

tandem sagittal

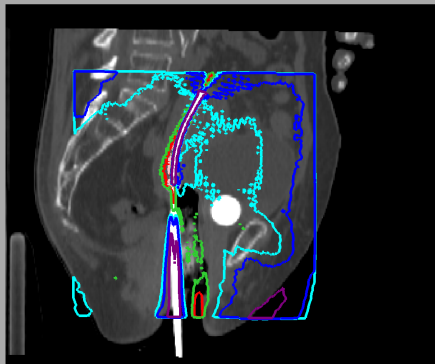

colpostats transverse

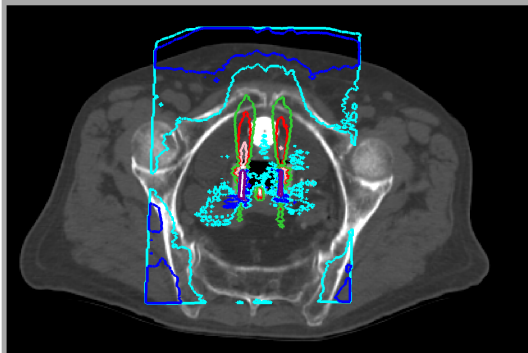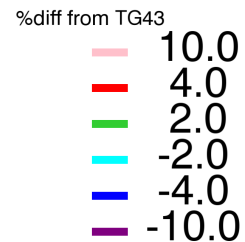

phantom least similar to TG43

D(Y,N,B,B)

D(Y,N,B,N)

D(Y,N,B,M)

D(N,N,N,N)

D(Y,N,N,N)

-->D(Y,N,M,M)<--

D(Y,M,X,X)

D(N,M,X,X)

phantom most similar to TG43

GBBS(solid model applicator, body, balloon and rectal contrast, packing contrast)

Patient\_12 D(Y,M,X,X) %difference from TG43

\*\*entire rectum overridden\*\*

left colpostat sagittal

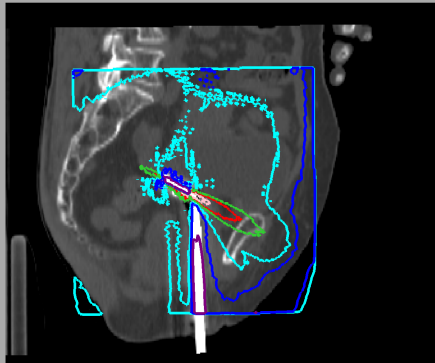

right colpostat sagittal

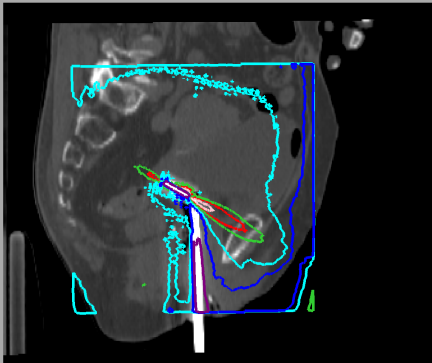

tandem sagittal

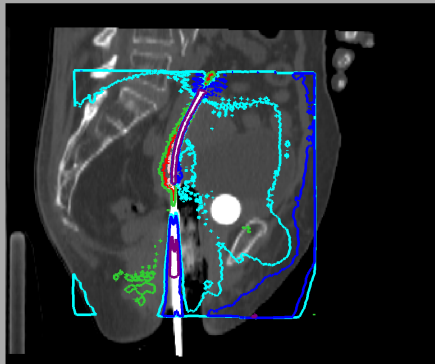

colpostats transverse

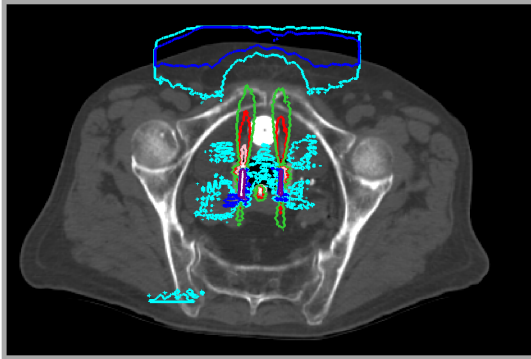

%diff from TG43



phantom least similar to TG43

D(Y,N,B,B)

D(Y,N,B,N)

D(Y,N,B,M)

D(N,N,N,N)

D(Y,N,N,N)

D(Y,N,M,M)

-->D(Y,M,X,X)<--

D(N,M,X,X)

phantom most similar to TG43

GBBS(solid model applicator, body, balloon and rectal contrast, packing contrast)



Patient\_12 D(N,M,X,X) %difference from TG43

\*\*entire rectum overridden\*\*

left colpostat sagittal

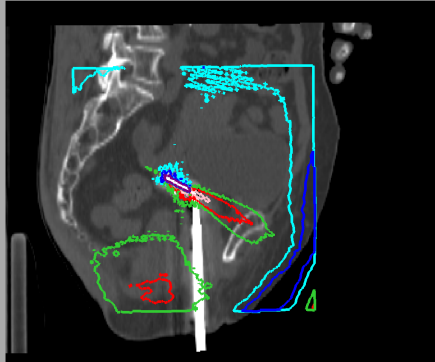

right colpostat sagittal

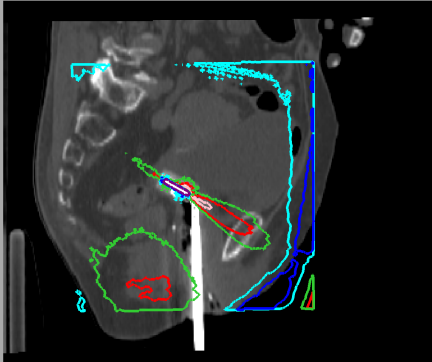

tandem sagittal

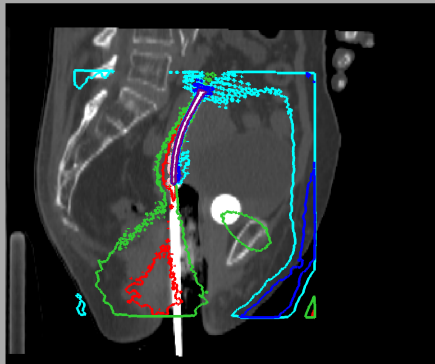

colpostats transverse

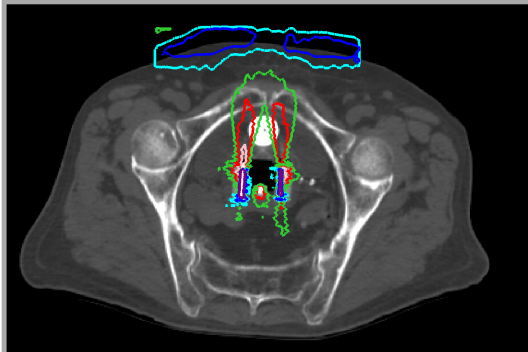

phantom least similar to TG43

D(Y,N,B,B)

D(Y,N,B,N)

D(Y,N,B,M)

D(N,N,N,N)

D(Y,N,N,N)

D(Y,N,M,M)

D(Y,M,X,X)

-->D(N,M,X,X)<--

phantom most similar to TG43

GBBS(solid model applicator, body, balloon and rectal contrast, packing contrast)

Patient\_13 D(Y,N,B,B) %difference from TG43

left colpostat sagittal

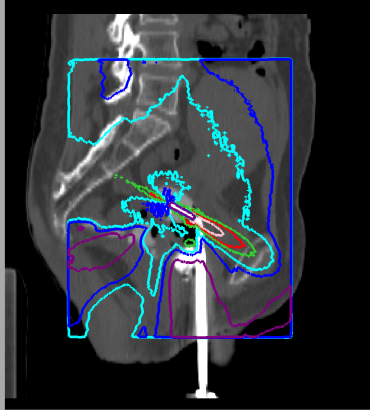

right colpostat sagittal

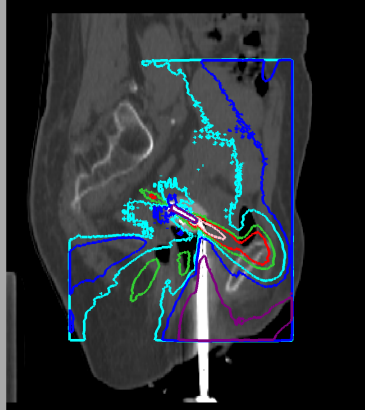

tandem sagittal

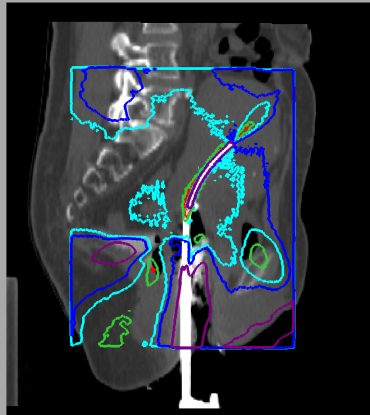

colpostats transverse

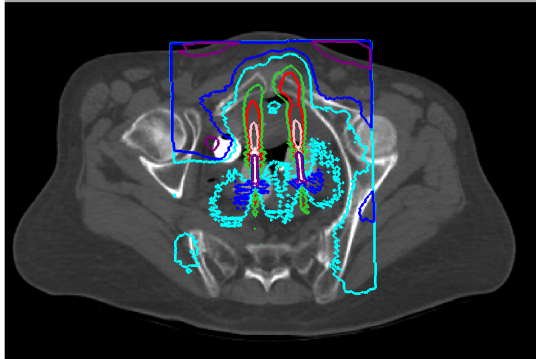

phantom least similar to TG43

-->D(Y,N,B,B)<--

D(Y,N,B,N)

D(Y,N,B,M)

D(N,N,N,N)

D(Y,N,N,N)

D(Y,N,M,M)

D(Y,M,X,X)

D(N,M,X,X)

phantom most similar to TG43

GBBS(solid model applicator, body, balloon and rectal contrast, packing contrast)

Patient\_13 D(Y,N,B,N) %difference from TG43

left colpostat sagittal

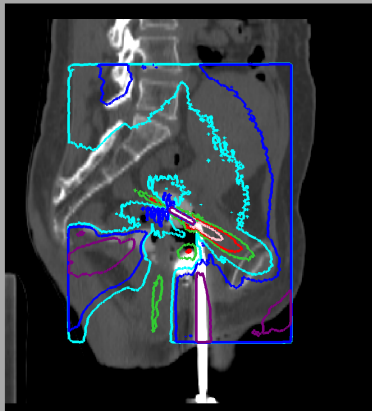

right colpostat sagittal

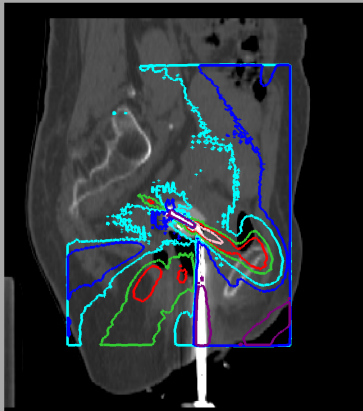

tandem sagittal

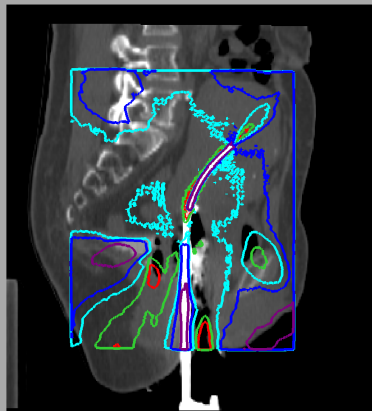

colpostats transverse

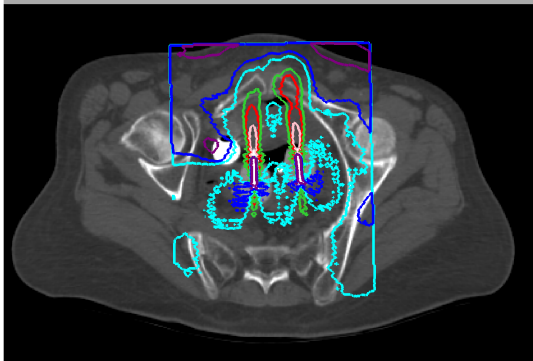

%diff from TG43



phantom least similar to TG43

D(Y,N,B,B)

-->D(Y,N,B,N)<--

D(Y,N,B,M)

D(N,N,N,N)

D(Y,N,N,N)

D(Y,N,M,M)

D(Y,M,X,X)

D(N,M,X,X)

phantom most similar to TG43

GBBS(solid model applicator, body, balloon and rectal contrast, packing contrast)

Patient\_13 D(Y,N,B,M) %difference from TG43

left colpostat sagittal

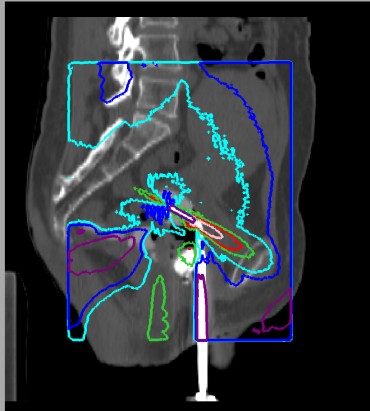

right colpostat sagittal

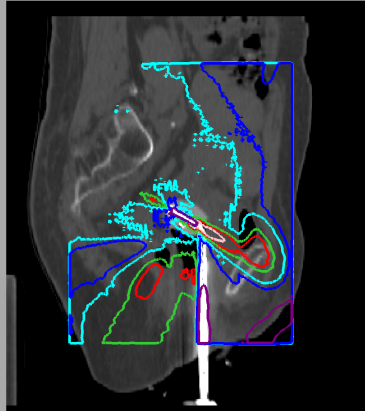

tandem sagittal

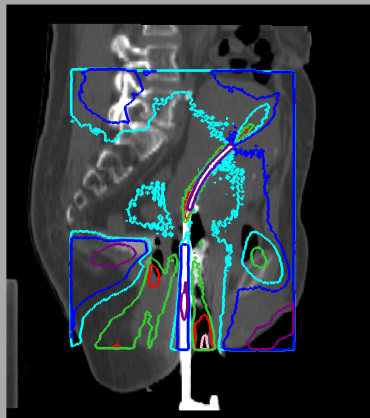

colpostats transverse

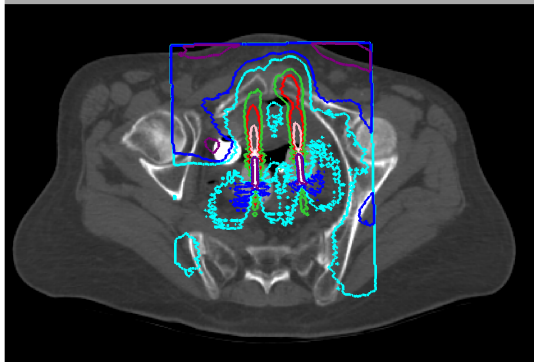

phantom least similar to TG43

D(Y,N,B,B)

D(Y,N,B,N)

-->D(Y,N,B,M)<--

D(N,N,N,N)

D(Y,N,N,N)

D(Y,N,M,M)

D(Y,M,X,X)

D(N,M,X,X)

phantom most similar to TG43

GBBS(solid model applicator, body, balloon and rectal contrast, packing contrast)

Patient\_13 D(N,N,N,N) %difference from TG43

left colpostat sagittal

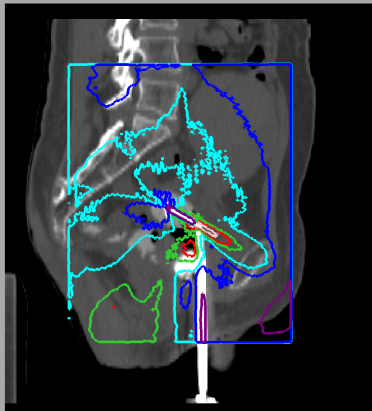

right colpostat sagittal

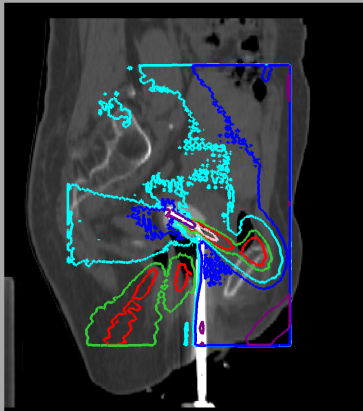

tandem sagittal

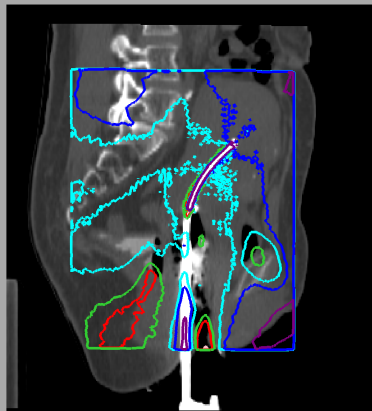

colpostats transverse

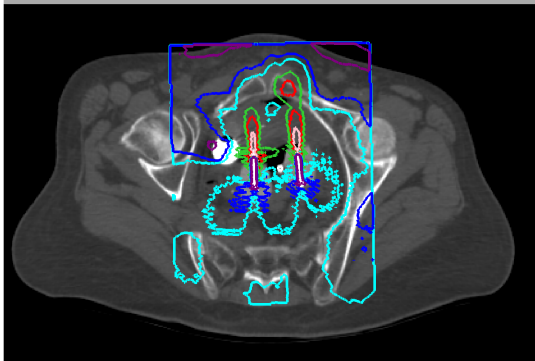

%diff from TG43



phantom least similar to TG43

D(Y,N,B,B)

D(Y,N,B,N)

D(Y,N,B,M)

-->D(N,N,N,N)<--

D(Y,N,N,N)

D(Y,N,M,M)

D(Y,M,X,X)

D(N,M,X,X)

phantom most similar to TG43

GBBS(solid model applicator, body, balloon and rectal contrast, packing contrast)

Patient\_13 D(Y,N,N,N) %difference from TG43

left colpostat sagittal

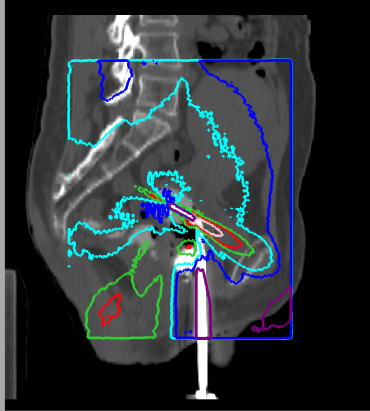

right colpostat sagittal

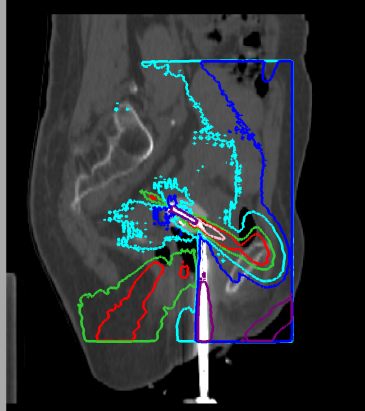

tandem sagittal

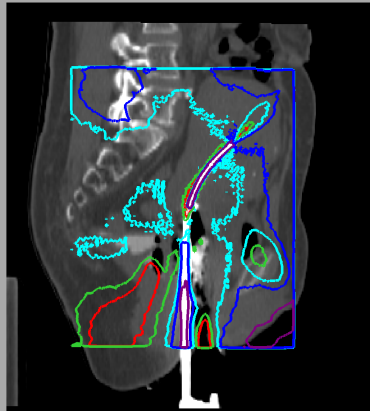

colpostats transverse

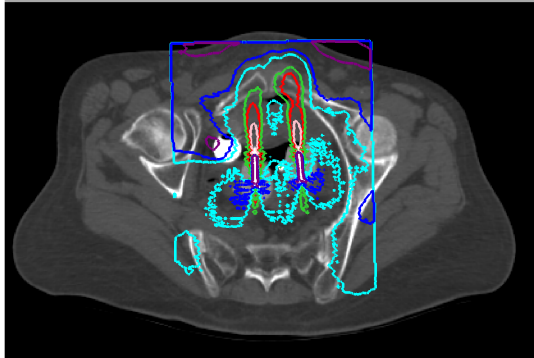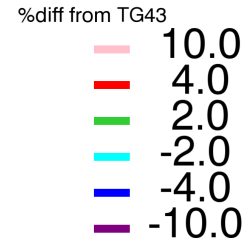

phantom least similar to TG43

D(Y,N,B,B)

D(Y,N,B,N)

D(Y,N,B,M)

D(N,N,N,N)

-->D(Y,N,N,N)<--

D(Y,N,M,M)

D(Y,M,X,X)

D(N,M,X,X)

phantom most similar to TG43

GBBS(solid model applicator, body, balloon and rectal contrast, packing contrast)

Patient\_13 D(Y,N,M,M) %difference from TG43

left colpostat sagittal

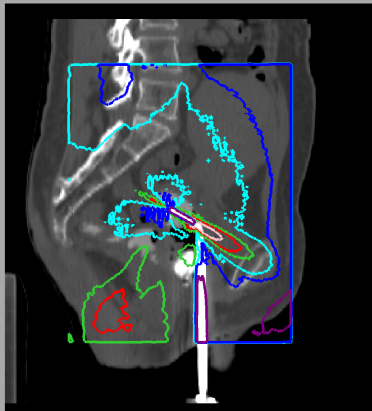

right colpostat sagittal

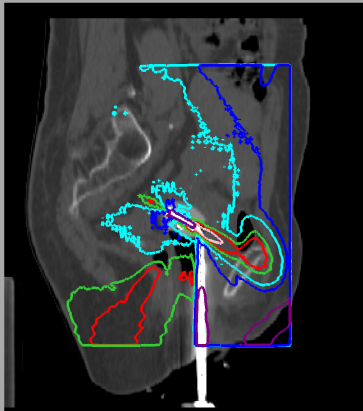

tandem sagittal

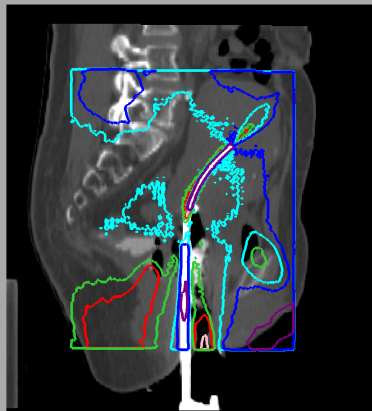

colpostats transverse

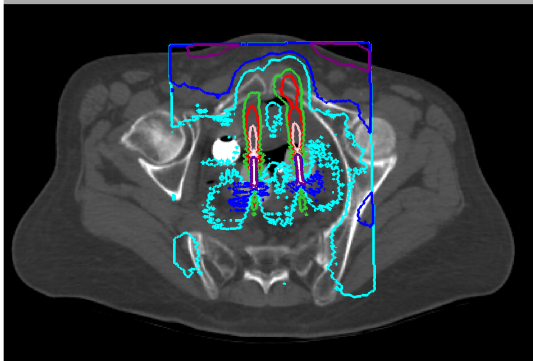

%diff from TG43



phantom least similar to TG43

D(Y,N,B,B)

D(Y,N,B,N)

D(Y,N,B,M)

D(N,N,N,N)

D(Y,N,N,N)

-->D(Y,N,M,M)<--

D(Y,M,X,X)

D(N,M,X,X)

phantom most similar to TG43

GBBS(solid model applicator, body, balloon and rectal contrast, packing contrast)

Patient\_13 D(Y,M,X,X) %difference from TG43

left colpostat sagittal

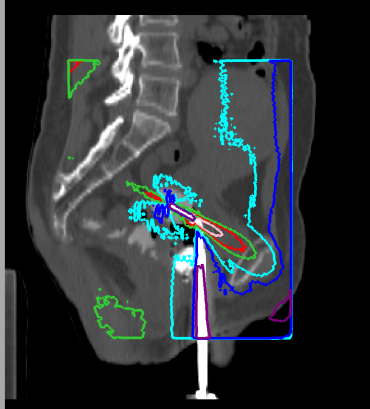

right colpostat sagittal

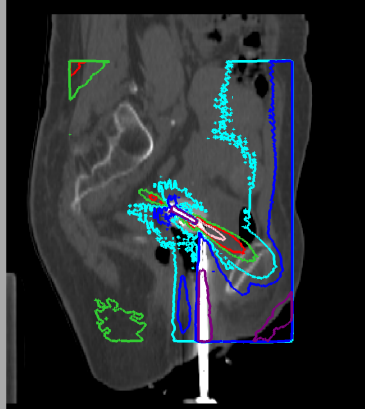

tandem sagittal

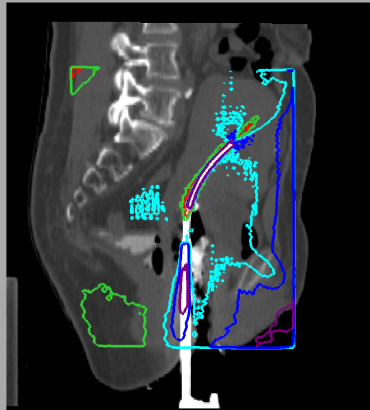

colpostats transverse

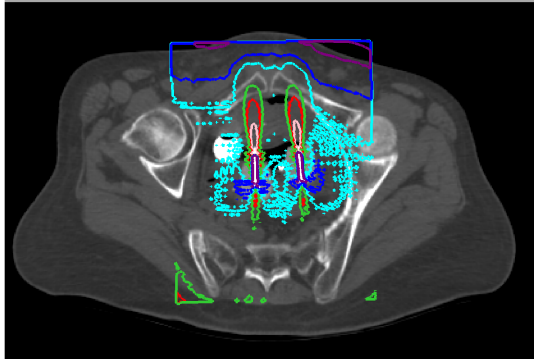

phantom least similar to TG43

D(Y,N,B,B)

D(Y,N,B,N)

D(Y,N,B,M)

D(N,N,N,N)

D(Y,N,N,N)

D(Y,N,M,M)

-->D(Y,M,X,X)<--

D(N,M,X,X)

phantom most similar to TG43

GBBS(solid model applicator, body, balloon and rectal contrast, packing contrast)
