# Supplementary material
Source: PubMed Central journal article supplement (PMC3955059)
Supplement: NIHMS539658-supplement-12.pdf [file NIHMS539658-supplement-12.pdf]

Patient\_13 D(N,M,X,X) %difference from TG43

left colpostat sagittal

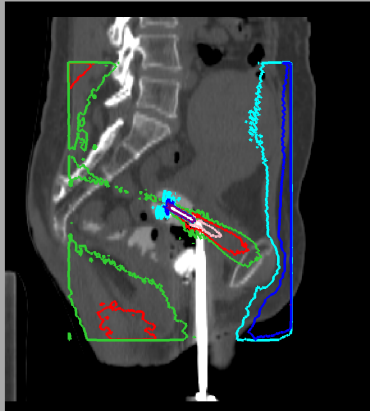

right colpostat sagittal

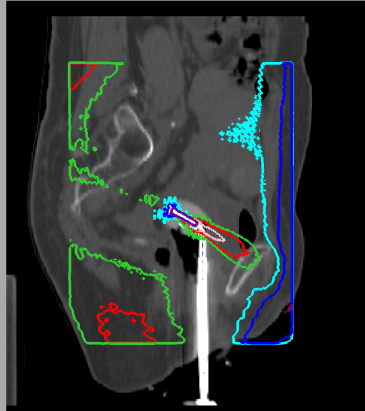

tandem sagittal

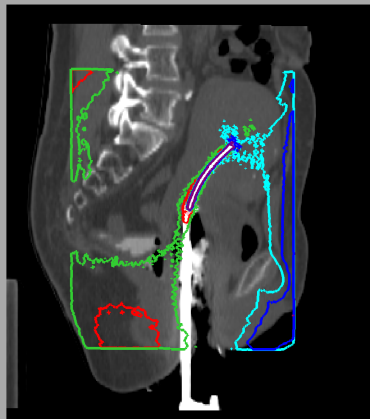

colpostats transverse

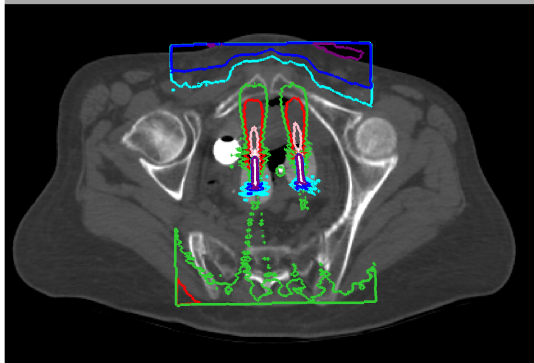

%diff from TG43

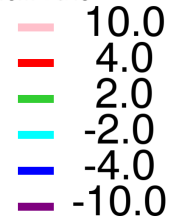

phantom least similar to TG43

D(Y,N,B,B)

D(Y,N,B,N)

D(Y,N,B,M)

D(N,N,N,N)

D(Y,N,N,N)

D(Y,N,M,M)

D(Y,M,X,X)

-->D(N,M,X,X)<--

phantom most similar to TG43

GBBS(solid model applicator, body, balloon and rectal contrast, packing contrast)

Patient\_14 D(Y,N,B,B) %difference from TG43

\*\*entire rectum overridden\*\*

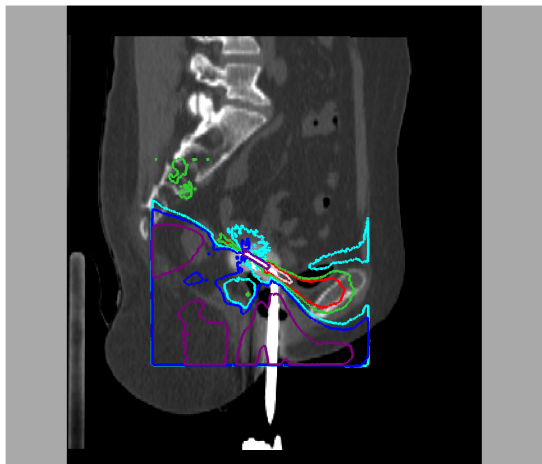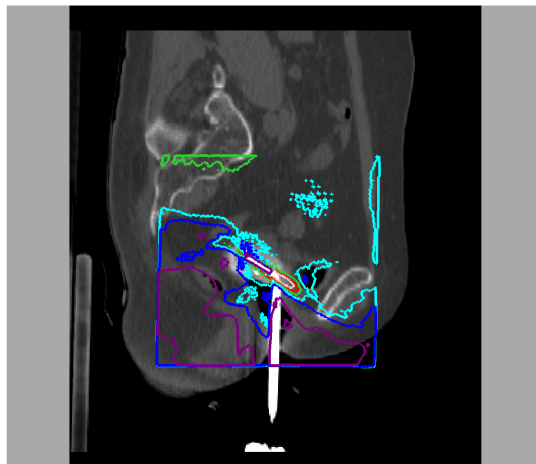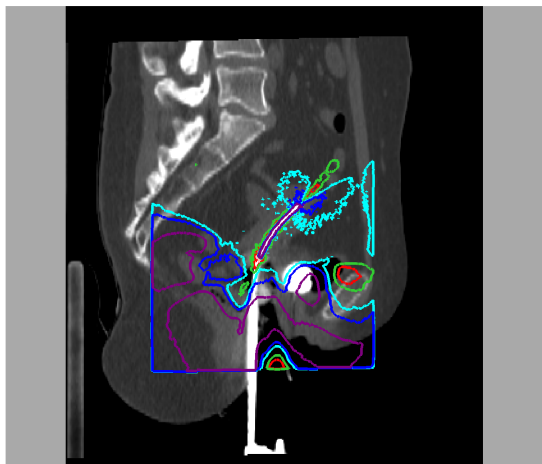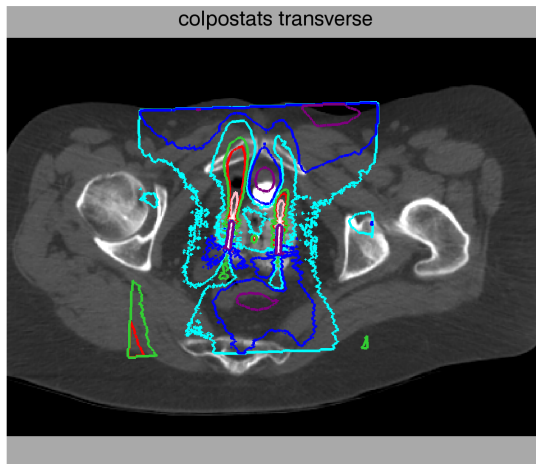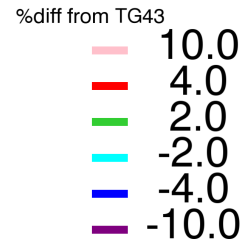

GBBS(solid model applicator, body, balloon and rectal contrast, packing contrast)

phantom least similar to TG43

-->D(Y,N,B,B)<--

D(Y,N,B,N)

D(Y,N,B,M)

D(N,N,N,N)

D(Y,N,N,N)

D(Y,N,M,M)

D(Y,M,X,X)

D(N,M,X,X)

phantom most similar to TG43

Patient\_14 D(Y,N,B,N) %difference from TG43

\*\*entire rectum overridden\*\*

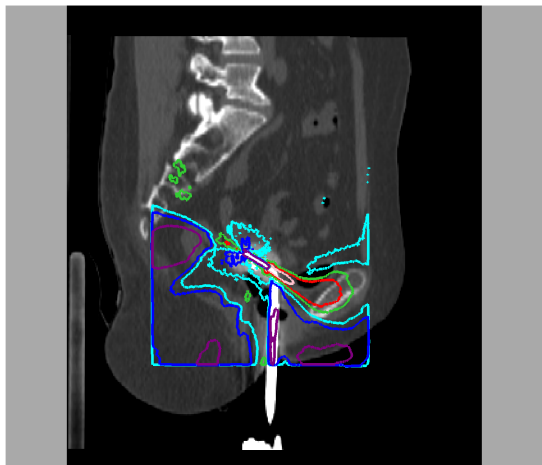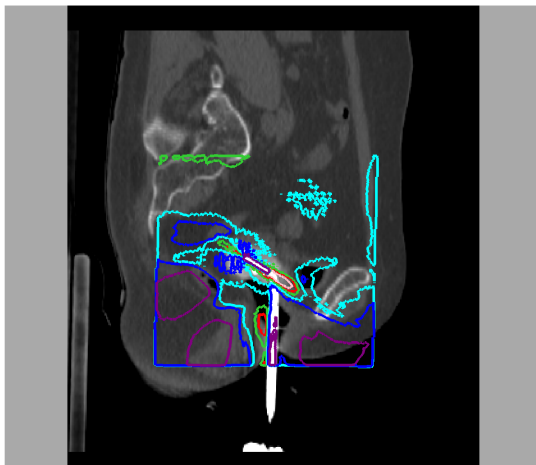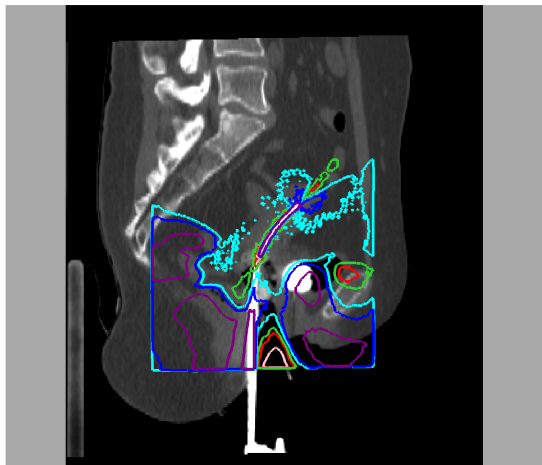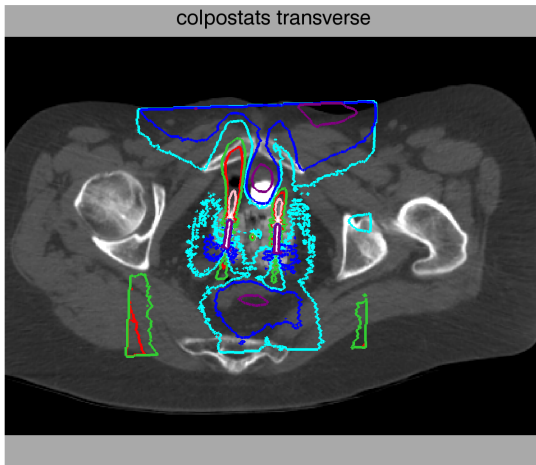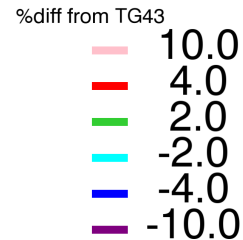

phantom least similar to TG43

D(Y,N,B,B)

-->D(Y,N,B,N)<--

D(Y,N,B,M)

D(N,N,N,N)

D(Y,N,N,N)

D(Y,N,M,M)

D(Y,M,X,X)

D(N,M,X,X)

phantom most similar to TG43

GBBS(solid model applicator, body, balloon and rectal contrast, packing contrast)

Patient\_14 D(Y,N,B,M) %difference from TG43

\*\*entire rectum overridden\*\*

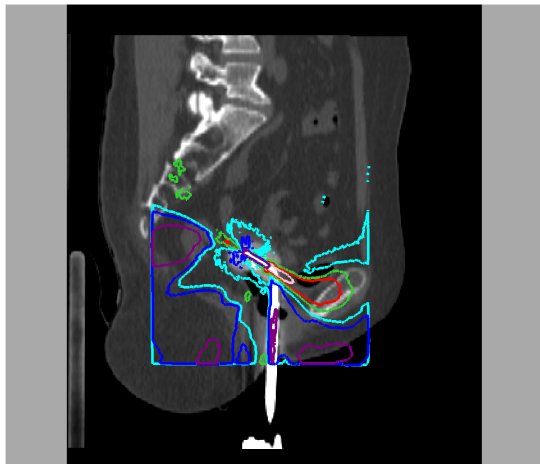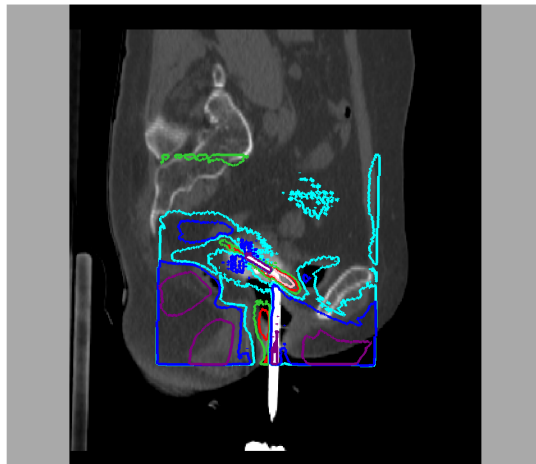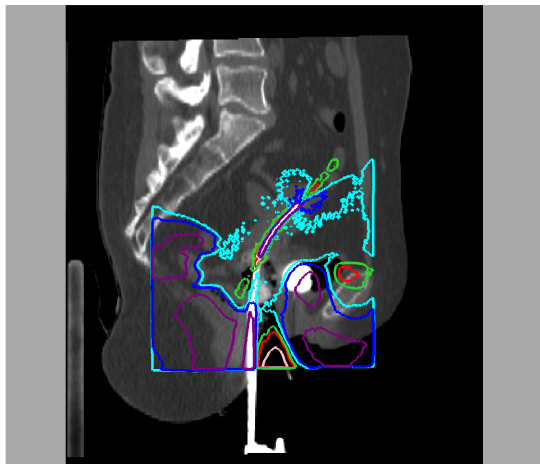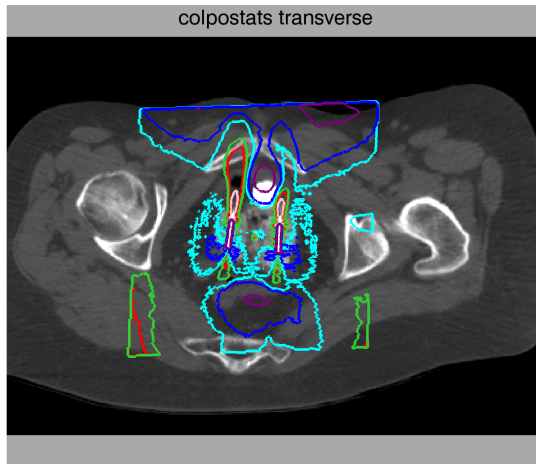

GBBS(solid model applicator, body, balloon and rectal contrast, packing contrast)

phantom least similar to TG43

D(Y,N,B,B)

D(Y,N,B,N)

-->D(Y,N,B,M)<--

D(N,N,N,N)

D(Y,N,N,N)

D(Y,N,M,M)

D(Y,M,X,X)

D(N,M,X,X)

phantom most similar to TG43

Patient\_14 D(N,N,N,N) %difference from TG43

\*\*entire rectum overridden\*\*

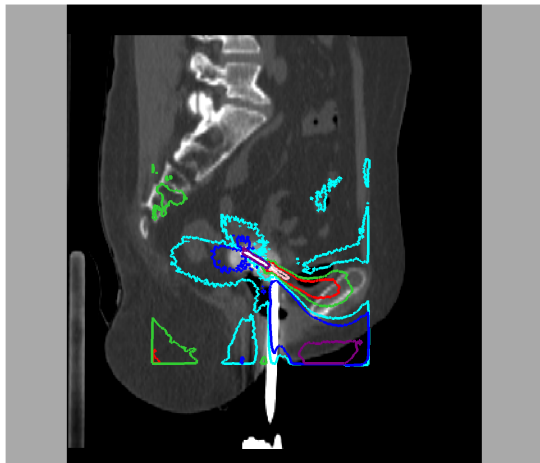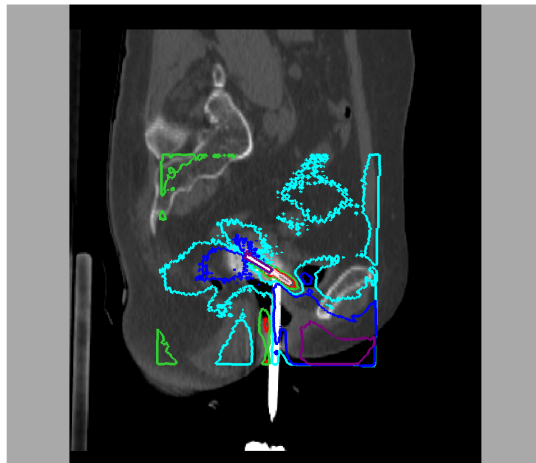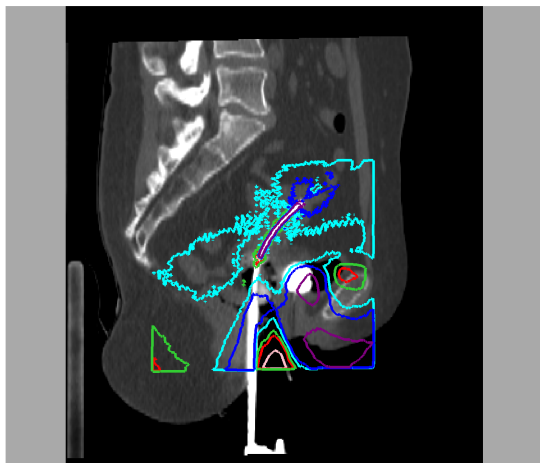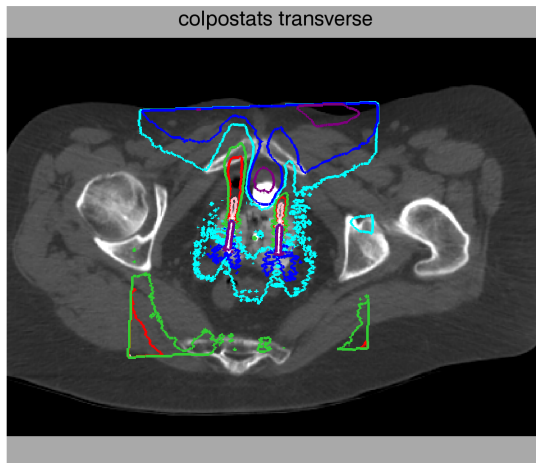

phantom least similar to TG43

D(Y,N,B,B)

D(Y,N,B,N)

D(Y,N,B,M)

-->D(N,N,N,N)<--

D(Y,N,N,N)

D(Y,N,M,M)

D(Y,M,X,X)

D(N,M,X,X)

phantom most similar to TG43

GBBS(solid model applicator, body, balloon and rectal contrast, packing contrast)

Patient\_14 D(Y,N,N,N) %difference from TG43

\*\*entire rectum overridden\*\*

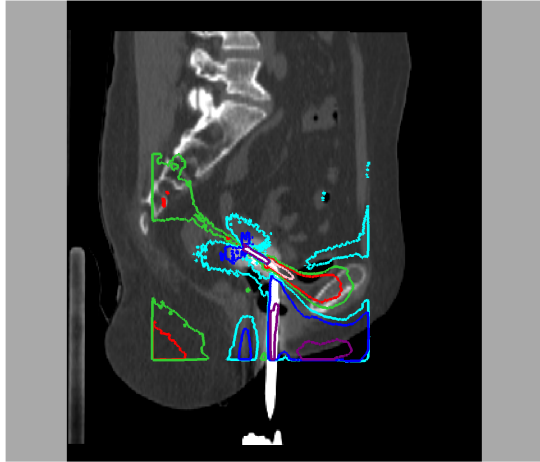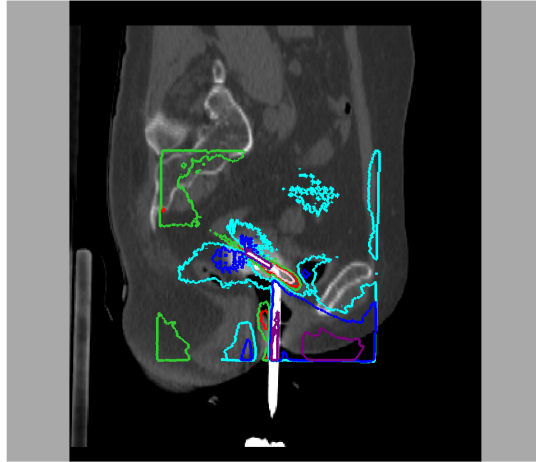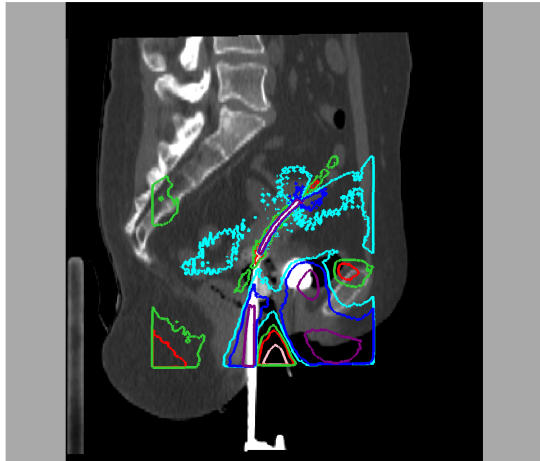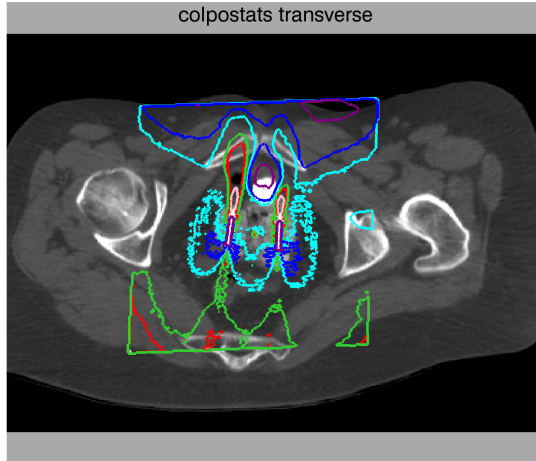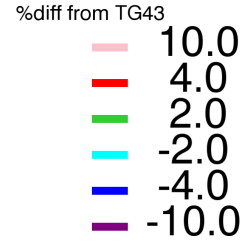

phantom least similar to TG43

D(Y,N,B,B)

D(Y,N,B,N)

D(Y,N,B,M)

D(N,N,N,N)

-->D(Y,N,N,N)<--

D(Y,N,M,M)

D(Y,M,X,X)

D(N,M,X,X)

phantom most similar to TG43

GBBS(solid model applicator, body, balloon and rectal contrast, packing contrast)

Patient\_14 D(Y,N,M,M) %difference from TG43

\*\*entire rectum overridden\*\*

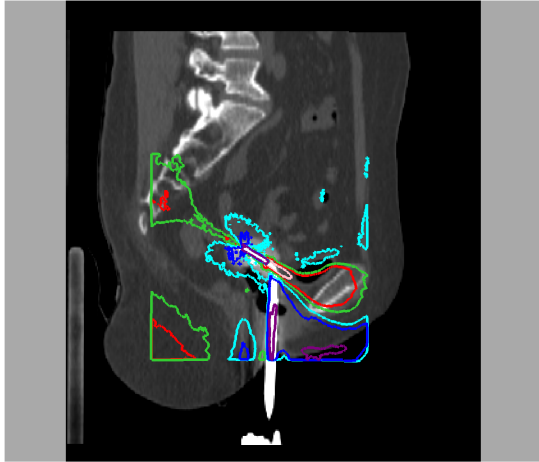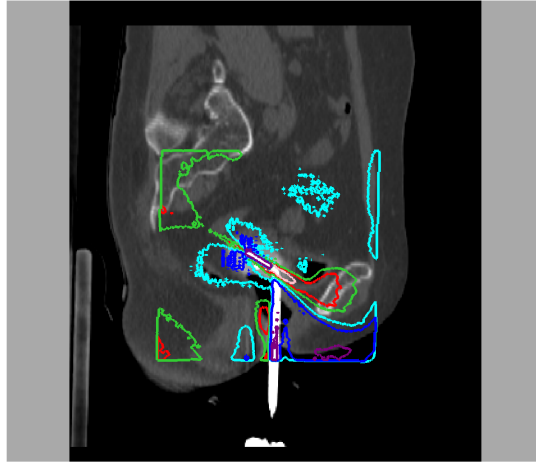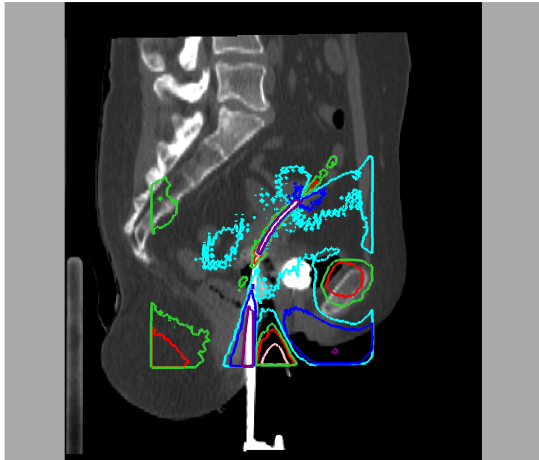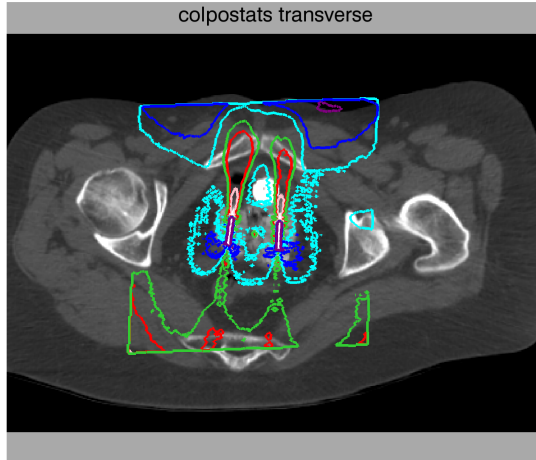

GBBS(solid model applicator, body, balloon and rectal contrast, packing contrast)

phantom least similar to TG43

D(Y,N,B,B)

D(Y,N,B,N)

D(Y,N,B,M)

D(N,N,N,N)

D(Y,N,N,N)

-->D(Y,N,M,M)<--

D(Y,M,X,X)

D(N,M,X,X)

phantom most similar to TG43

Patient\_14 D(Y,M,X,X) %difference from TG43

\*\*entire rectum overridden\*\*

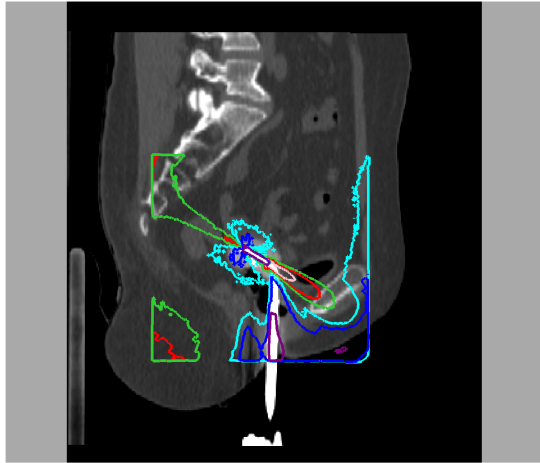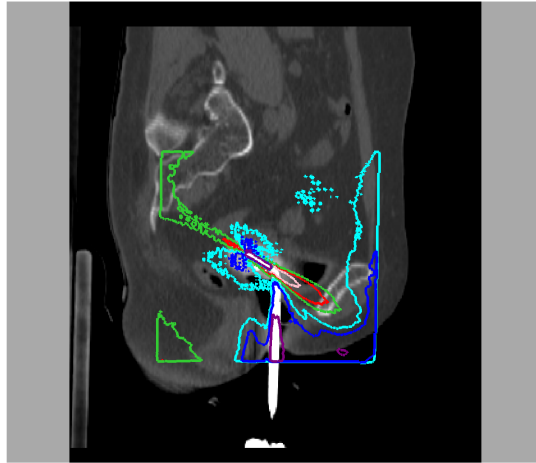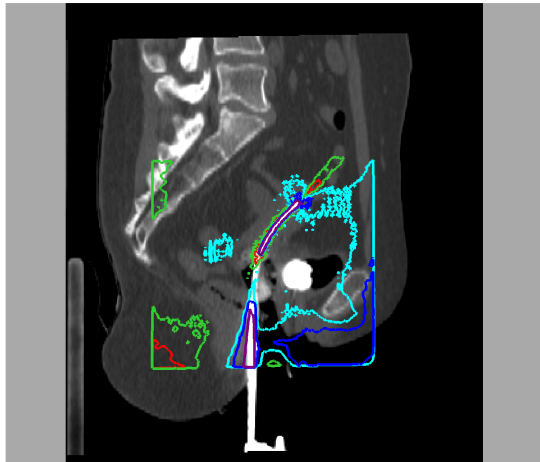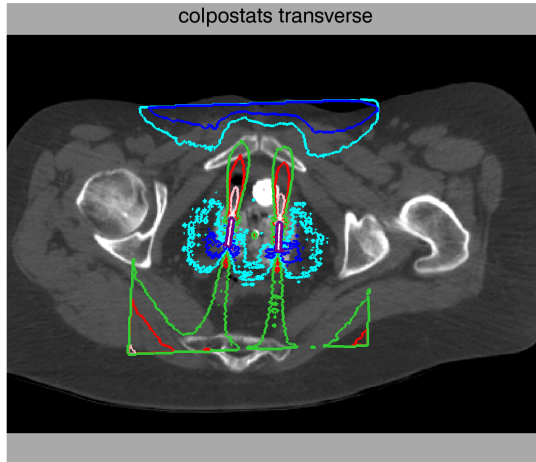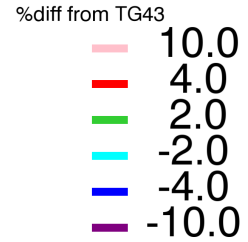

phantom least similar to TG43

D(Y,N,B,B)

D(Y,N,B,N)

D(Y,N,B,M)

D(N,N,N,N)

D(Y,N,N,N)

D(Y,N,M,M)

-->D(Y,M,X,X)<--

D(N,M,X,X)

phantom most similar to TG43

GBBS(solid model applicator, body, balloon and rectal contrast, packing contrast)



Patient\_14 D(N,M,X,X) %difference from TG43

\*\*entire rectum overridden\*\*

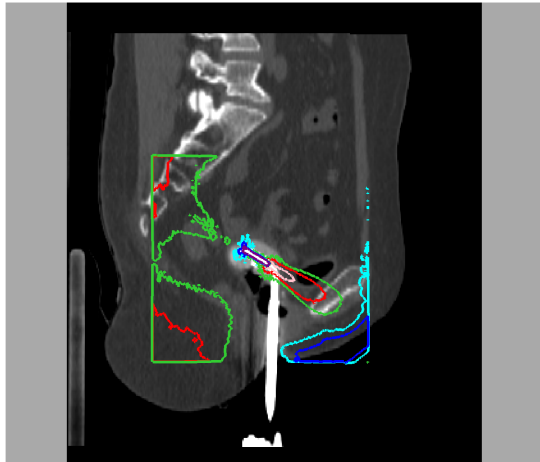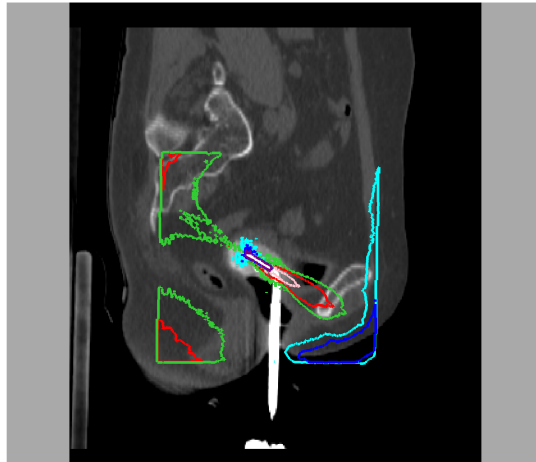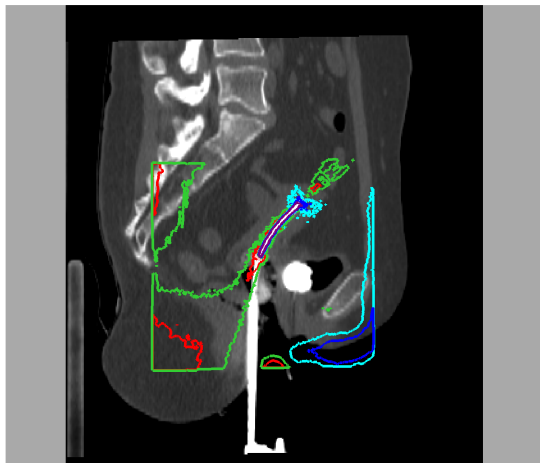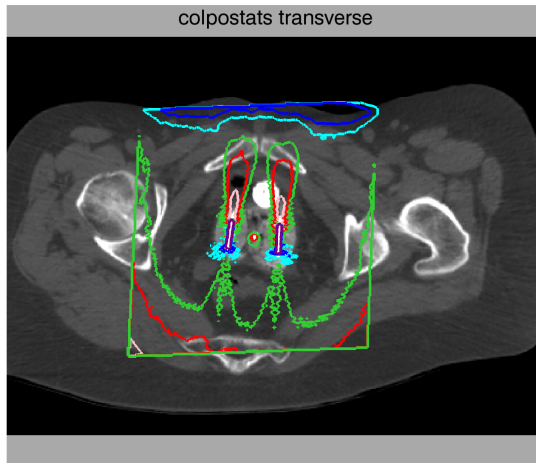

GBBS(solid model applicator, body, balloon and rectal contrast, packing contrast)

phantom least similar to TG43

- D(Y,N,B,B)
- D(Y,N,B,N)
- D(Y,N,B,M)
- D(N,N,N,N)
- D(Y,N,N,N)
- D(Y,N,M,M)
- D(Y,M,X,X)

-->D(N,M,X,X)<--

phantom most similar to TG43

Patient\_15 D(Y,N,B,B) %difference from TG43

\*\*entire rectum overridden\*\*

left colipostat sagittal

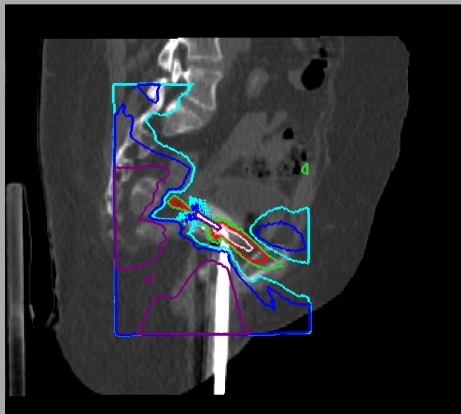

right colipostat sagittal

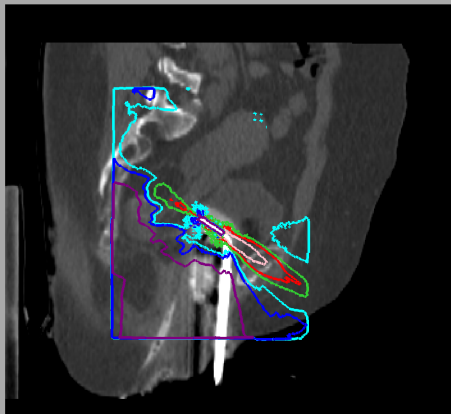

tandem sagittal

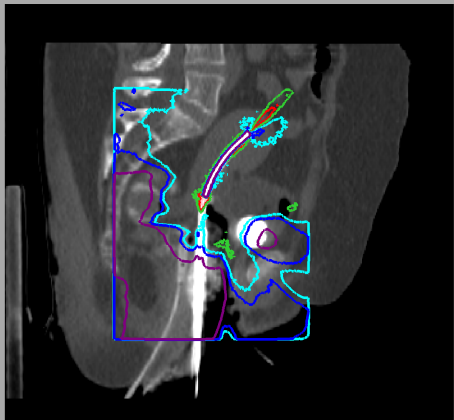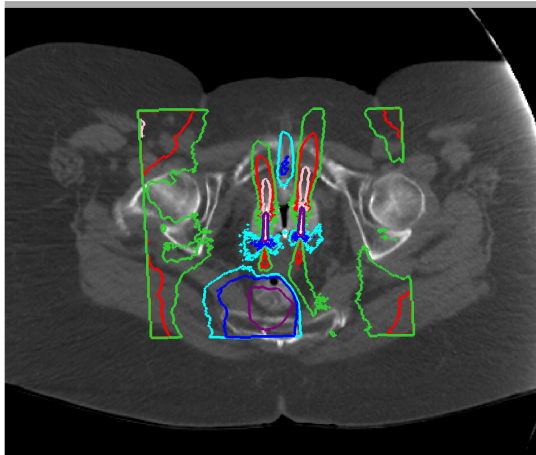

%diff from TG43

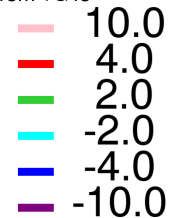

phantom least similar to TG43

-->D(Y,N,B,B)<--

D(Y,N,B,N)

D(Y,N,B,M)

D(N,N,N,N)

D(Y,N,N,N)

D(Y,N,M,M)

D(Y,M,X,X)

D(N,M,X,X)

phantom most similar to TG43

GBBS(solid model applicator, body, balloon and rectal contrast, packing contrast)

Patient\_15 D(Y,N,B,N) %difference from TG43

\*\*entire rectum overridden\*\*

left colipostat sagittal

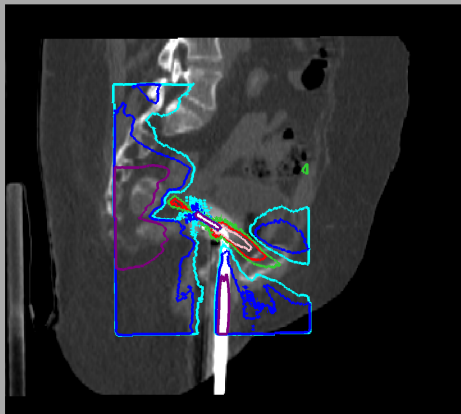

right colipostat sagittal

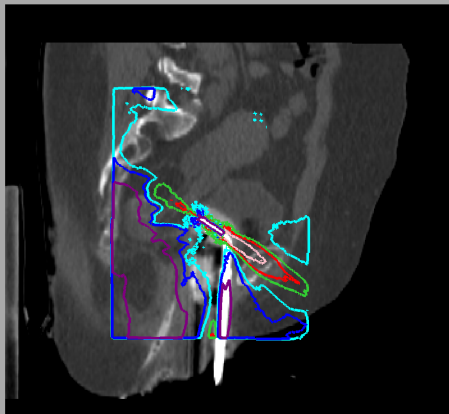

tandem sagittal

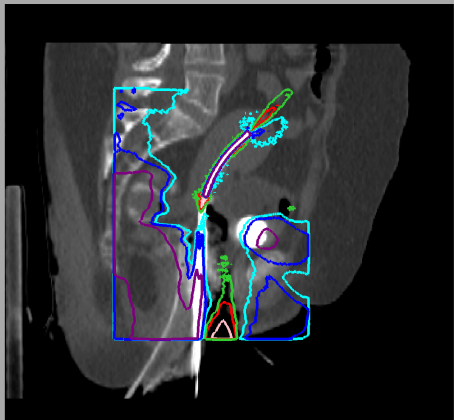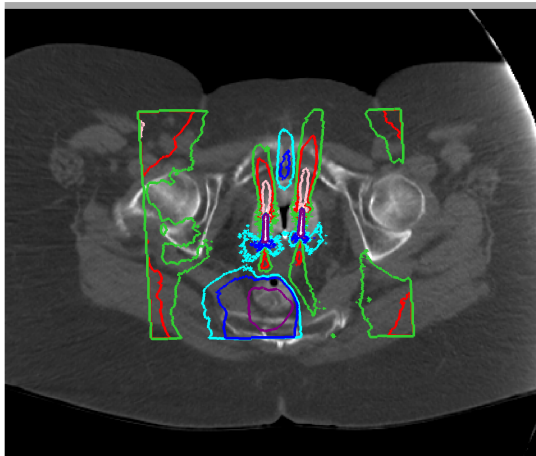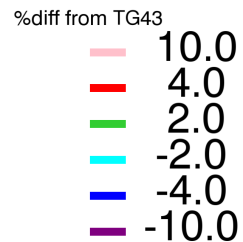

phantom least similar to TG43

D(Y,N,B,B)

-->D(Y,N,B,N)<--

D(Y,N,B,M)

D(N,N,N,N)

D(Y,N,N,N)

D(Y,N,M,M)

D(Y,M,X,X)

D(N,M,X,X)

phantom most similar to TG43

GBBS(solid model applicator, body, balloon and rectal contrast, packing contrast)

Patient\_15 D(Y,N,B,M) %difference from TG43

\*\*entire rectum overridden\*\*

left colipostat sagittal

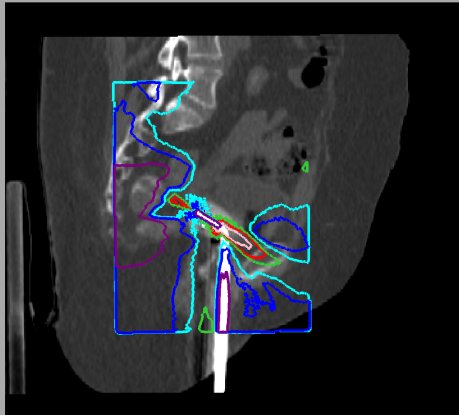

right colipostat sagittal

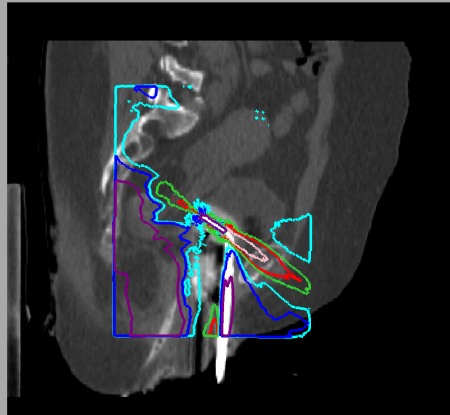

tandem sagittal

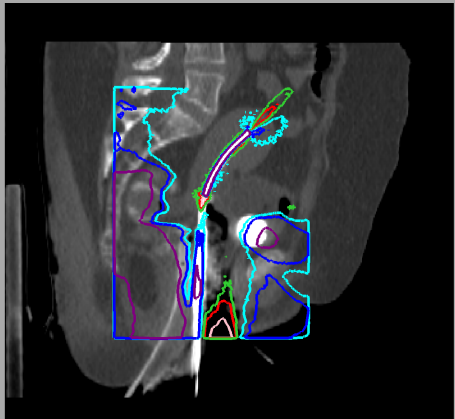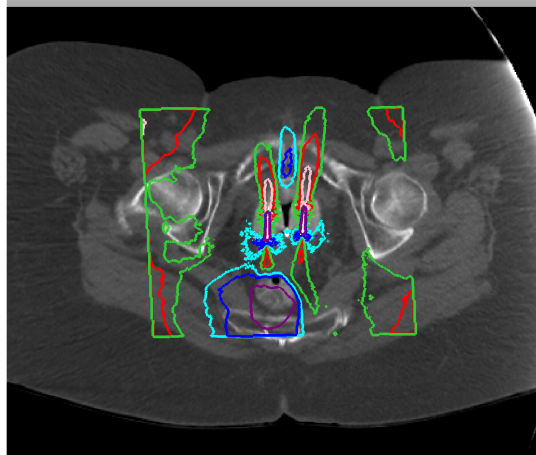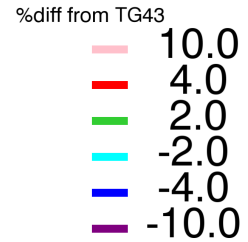

phantom least similar to TG43

D(Y,N,B,B)

D(Y,N,B,N)

-->D(Y,N,B,M)<--

D(N,N,N,N)

D(Y,N,N,N)

D(Y,N,M,M)

D(Y,M,X,X)

D(N,M,X,X)

phantom most similar to TG43

GBBS(solid model applicator, body, balloon and rectal contrast, packing contrast)

Patient\_15 D(N,N,N,N) %difference from TG43

\*\*entire rectum overridden\*\*

left colipostat sagittal

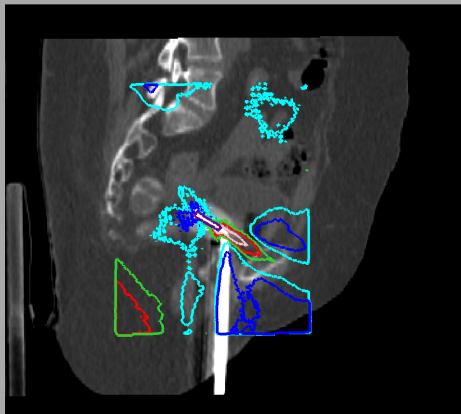

right colipostat sagittal

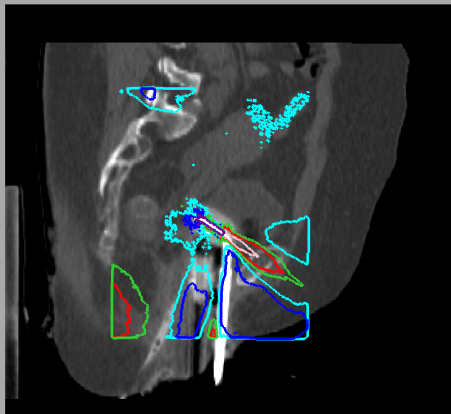

tandem sagittal

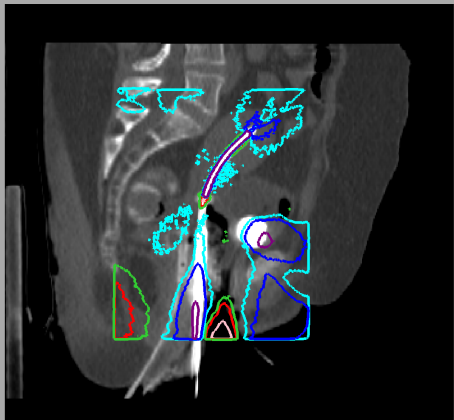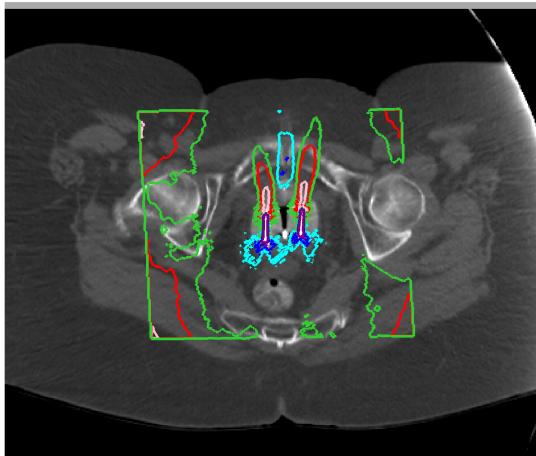

%diff from TG43



phantom least similar to TG43

D(Y,N,B,B)

D(Y,N,B,N)

D(Y,N,B,M)

-->D(N,N,N,N)<--

D(Y,N,N,N)

D(Y,N,M,M)

D(Y,M,X,X)

D(N,M,X,X)

phantom most similar to TG43

GBBS(solid model applicator, body, balloon and rectal contrast, packing contrast)

Patient\_15 D(Y,N,N,N) %difference from TG43

\*\*entire rectum overridden\*\*

left copostat sagittal

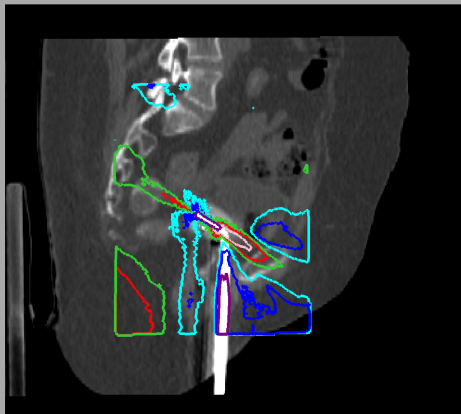

right copostat sagittal

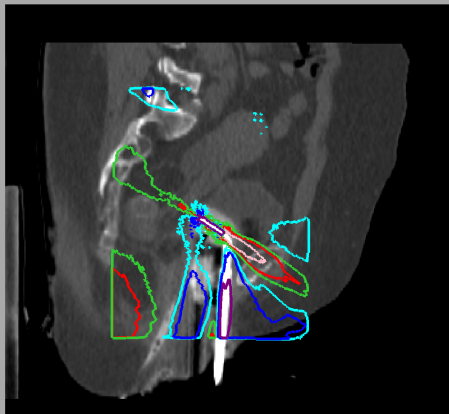

tandem sagittal

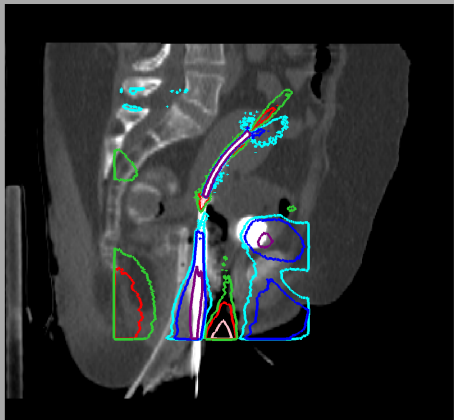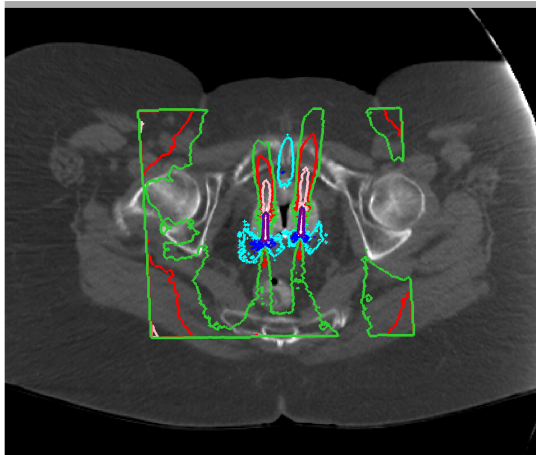

%diff from TG43

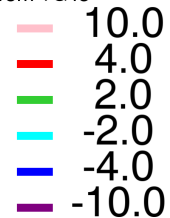

GBBS(solid model applicator, body, balloon and rectal contrast, packing contrast)

phantom least similar to TG43

D(Y,N,B,B)

D(Y,N,B,N)

D(Y,N,B,M)

D(N,N,N,N)

-->D(Y,N,N,N)<--

D(Y,N,M,M)

D(Y,M,X,X)

D(N,M,X,X)

phantom most similar to TG43

Patient\_15 D(Y,N,M,M) %difference from TG43

\*\*entire rectum overridden\*\*

left copostat sagittal

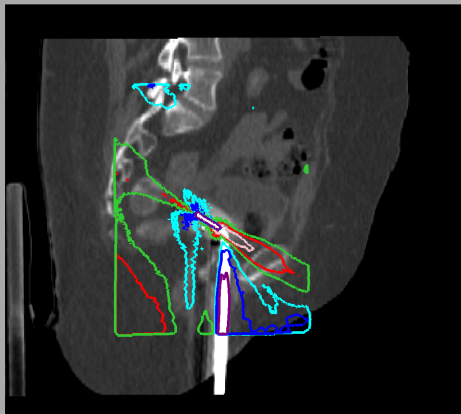

right copostat sagittal

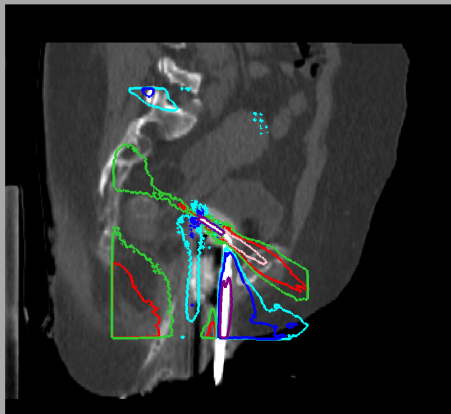

tandem sagittal

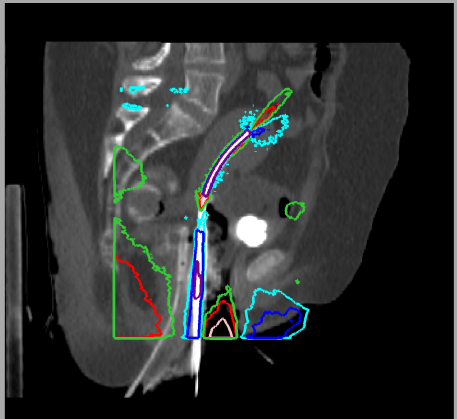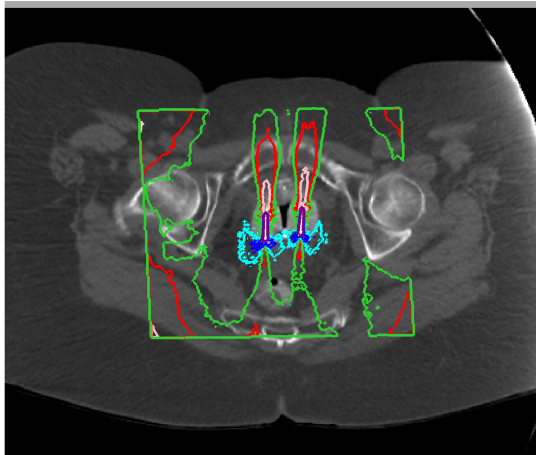

%diff from TG43



phantom least similar to TG43

D(Y,N,B,B)

D(Y,N,B,N)

D(Y,N,B,M)

D(N,N,N,N)

D(Y,N,N,N)

-->D(Y,N,M,M)<--

D(Y,M,X,X)

D(N,M,X,X)

phantom most similar to TG43

GBBS(solid model applicator, body, balloon and rectal contrast, packing contrast)

Patient\_15 D(Y,M,X,X) %difference from TG43

\*\*entire rectum overridden\*\*

left colipostat sagittal

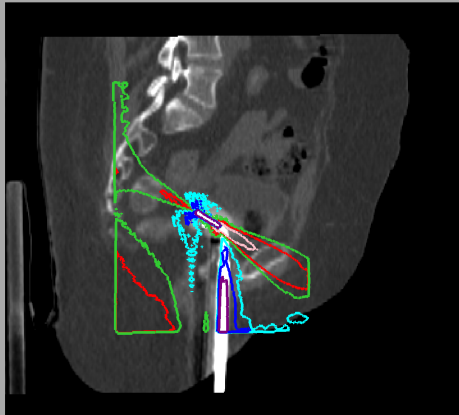

right colipostat sagittal

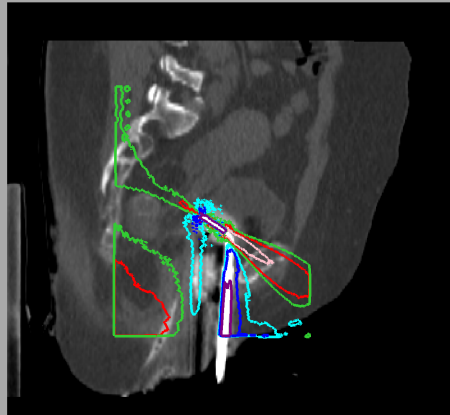

tandem sagittal

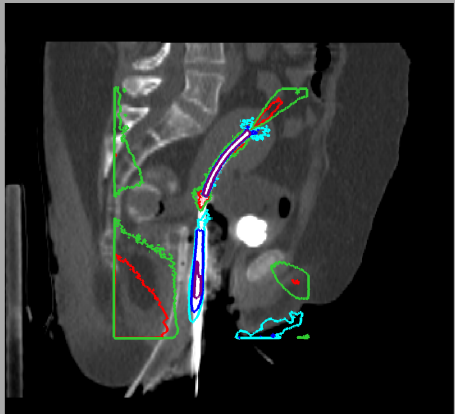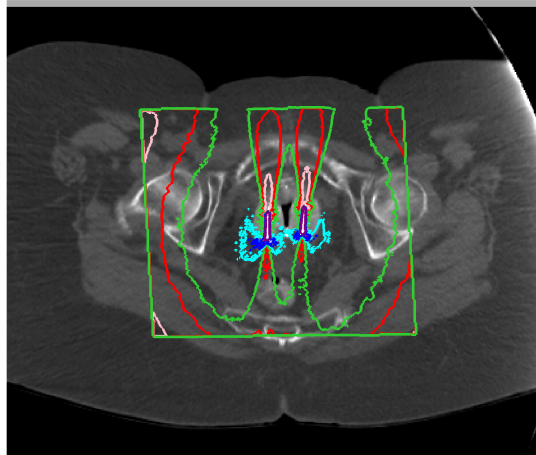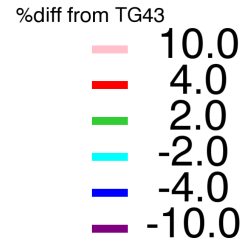

phantom least similar to TG43

D(Y,N,B,B)

D(Y,N,B,N)

D(Y,N,B,M)

D(N,N,N,N)

D(Y,N,N,N)

D(Y,N,M,M)

-->D(Y,M,X,X)<--

D(N,M,X,X)

phantom most similar to TG43

GBBS(solid model applicator, body, balloon and rectal contrast, packing contrast)



Patient\_15 D(N,M,X,X) %difference from TG43

\*\*entire rectum overridden\*\*

left colipostat sagittal

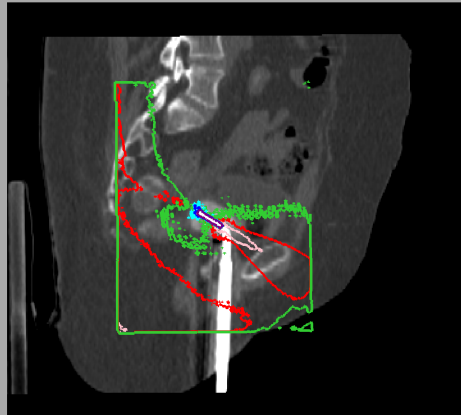

right colipostat sagittal

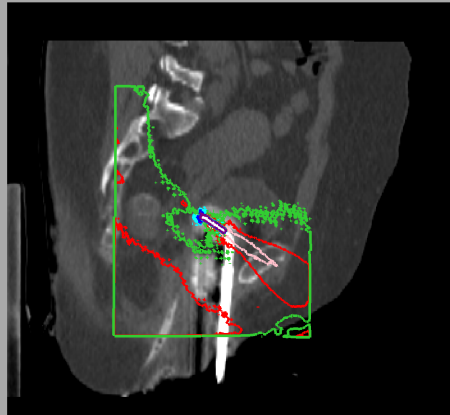

tandem sagittal

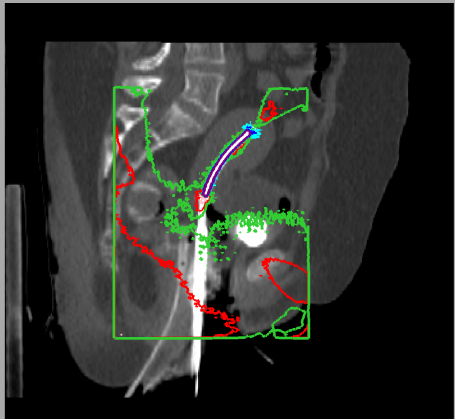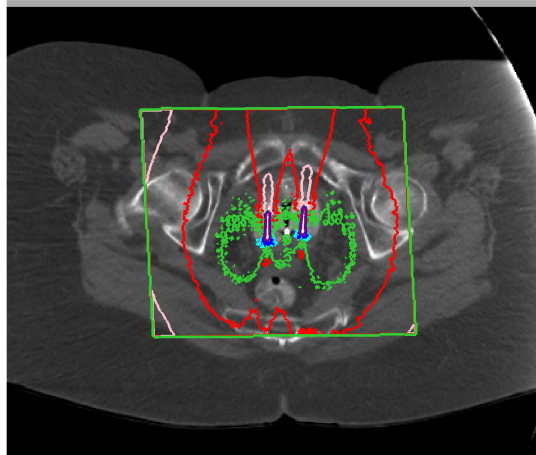

phantom least similar to TG43

D(Y,N,B,B)

D(Y,N,B,N)

D(Y,N,B,M)

D(N,N,N,N)

D(Y,N,N,N)

D(Y,N,M,M)

D(Y,M,X,X)

-->D(N,M,X,X)<--

phantom most similar to TG43

GBBS(solid model applicator, body, balloon and rectal contrast, packing contrast)

Patient\_16 D(Y,N,B,B) %difference from TG43

\*\*entire rectum overridden\*\*

left colipostat sagittal

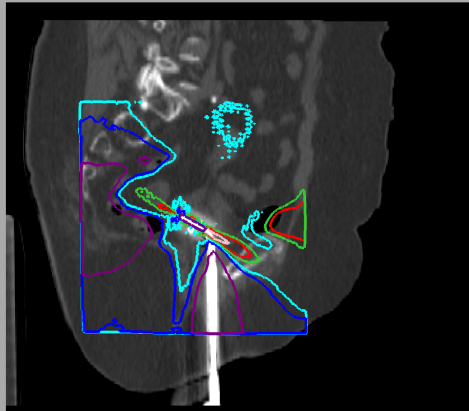

right colipostat sagittal

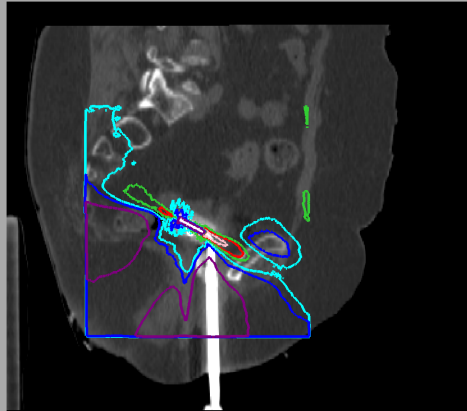

tandem sagittal

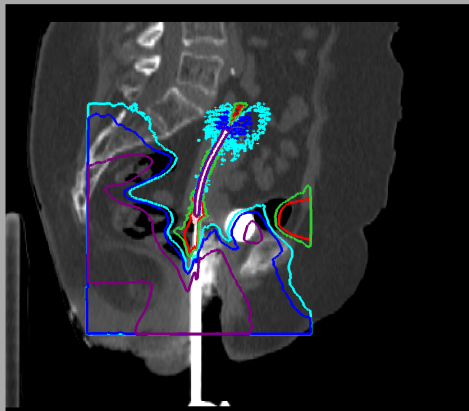

colipostats transverse

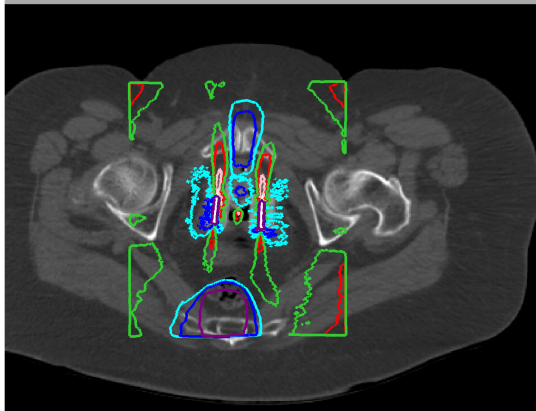

%diff from TG43



phantom least similar to TG43

-->D(Y,N,B,B)<--

D(Y,N,B,N)

D(Y,N,B,M)

D(N,N,N,N)

D(Y,N,N,N)

D(Y,N,M,M)

D(Y,M,X,X)

D(N,M,X,X)

phantom most similar to TG43

GBBS(solid model applicator, body, balloon and rectal contrast, packing contrast)

Patient\_16 D(Y,N,B,N) %difference from TG43

\*\*entire rectum overridden\*\*

left colipostat sagittal

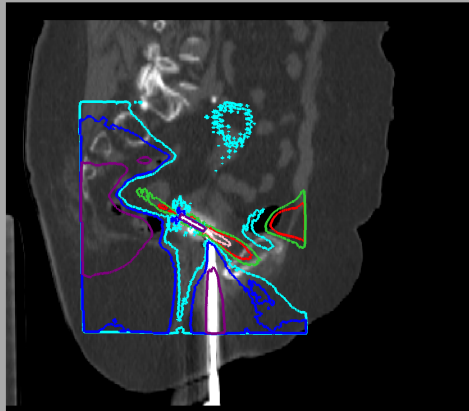

right colipostat sagittal

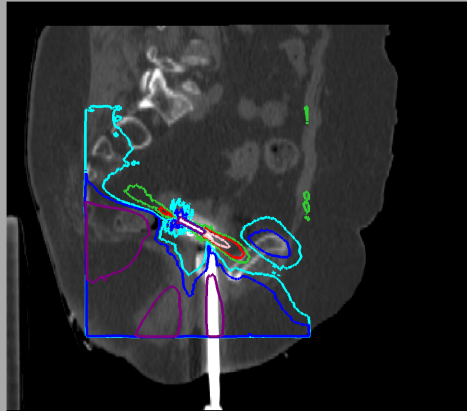

tandem sagittal

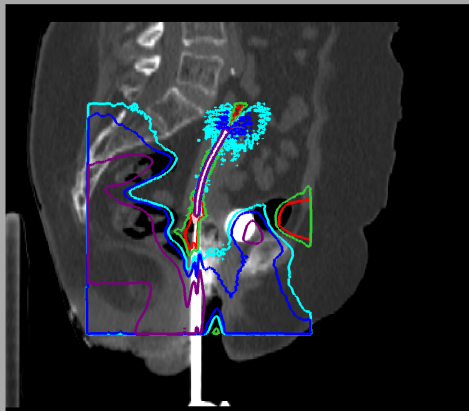

colipostats transverse

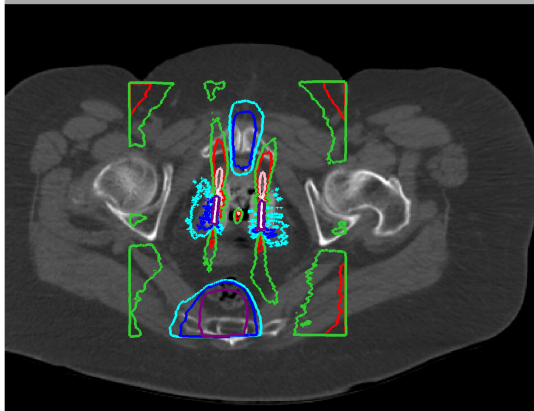

%diff from TG43



phantom least similar to TG43

D(Y,N,B,B)

-->D(Y,N,B,N)<--

D(Y,N,B,M)

D(N,N,N,N)

D(Y,N,N,N)

D(Y,N,M,M)

D(Y,M,X,X)

D(N,M,X,X)

phantom most similar to TG43

GBBS(solid model applicator, body, balloon and rectal contrast, packing contrast)

Patient\_16 D(Y,N,B,M) %difference from TG43

\*\*entire rectum overridden\*\*

left colipostat sagittal

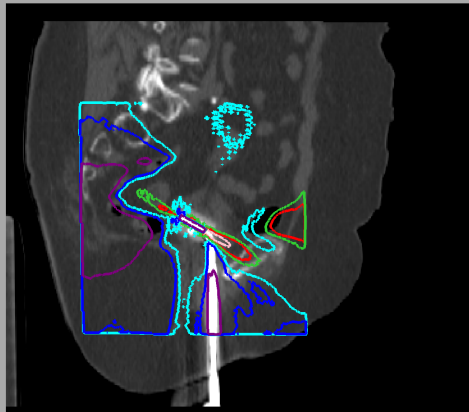

right colipostat sagittal

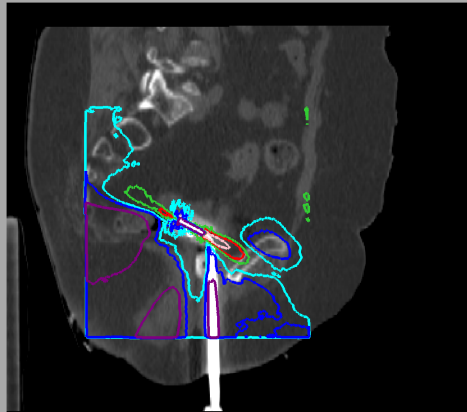

tandem sagittal

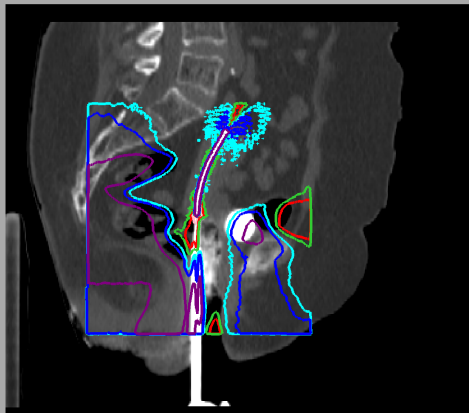

colipostats transverse

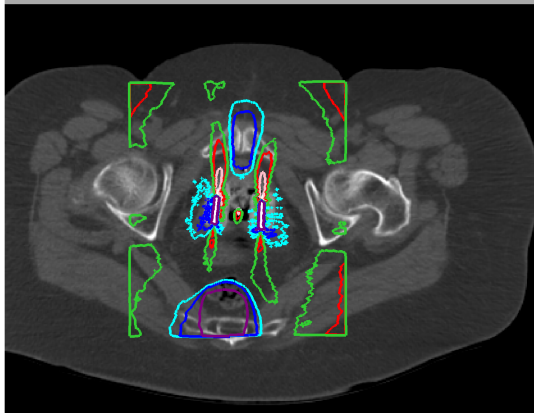

phantom least similar to TG43

D(Y,N,B,B)

D(Y,N,B,N)

-->D(Y,N,B,M)<--

D(N,N,N,N)

D(Y,N,N,N)

D(Y,N,M,M)

D(Y,M,X,X)

D(N,M,X,X)

phantom most similar to TG43

GBBS(solid model applicator, body, balloon and rectal contrast, packing contrast)

Patient\_16 D(N,N,N,N) %difference from TG43

\*\*entire rectum overridden\*\*

left colipostat sagittal

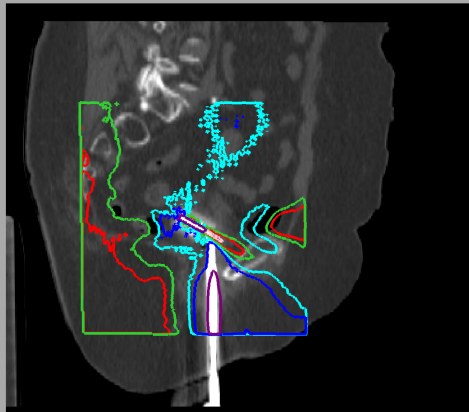

right colipostat sagittal

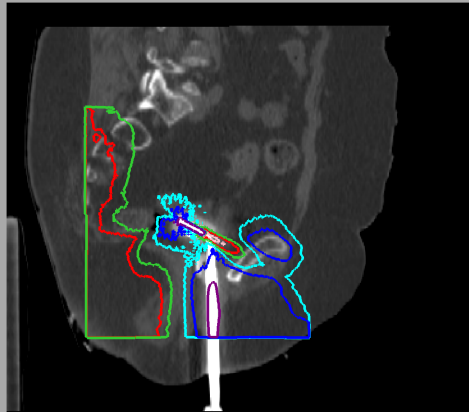

tandem sagittal

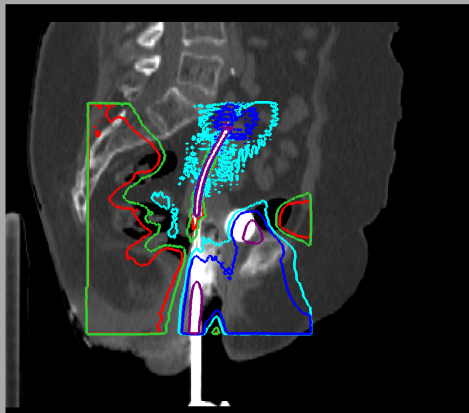

colipostats transverse

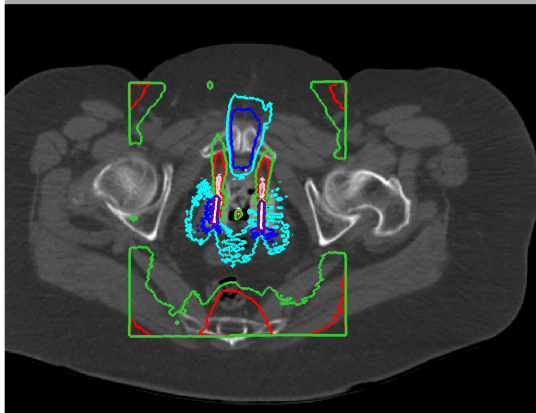

%diff from TG43



phantom least similar to TG43

D(Y,N,B,B)

D(Y,N,B,N)

D(Y,N,B,M)

-->D(N,N,N,N)<--

D(Y,N,N,N)

D(Y,N,M,M)

D(Y,M,X,X)

D(N,M,X,X)

phantom most similar to TG43

GBBS(solid model applicator, body, balloon and rectal contrast, packing contrast)

Patient\_16 D(Y,N,N,N) %difference from TG43

\*\*entire rectum overridden\*\*

left colipostat sagittal

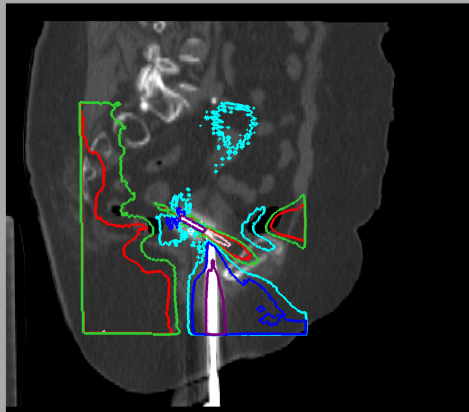

right colipostat sagittal

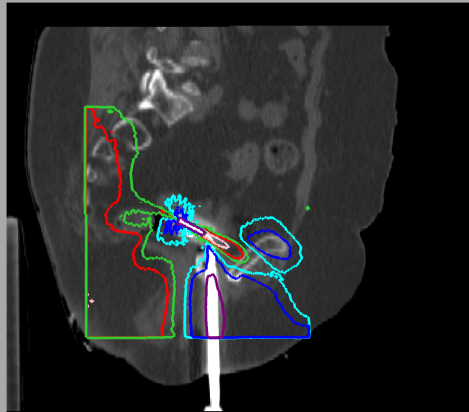

tandem sagittal

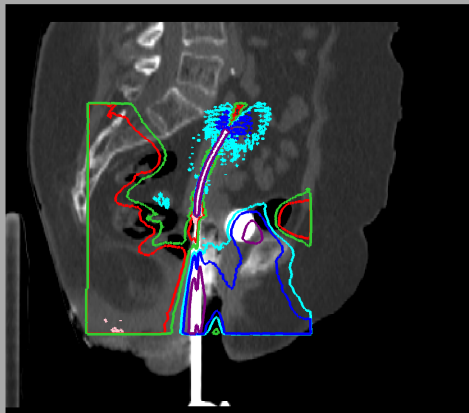

colipostats transverse

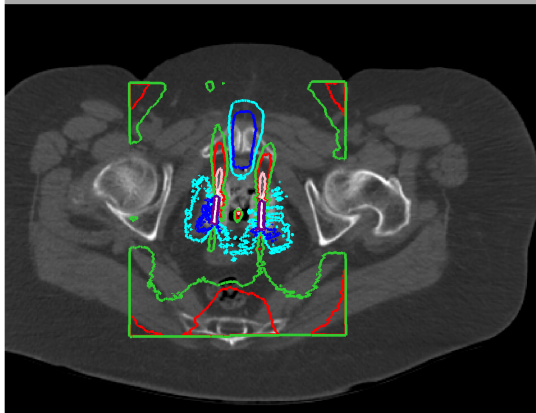

%diff from TG43



phantom least similar to TG43

D(Y,N,B,B)

D(Y,N,B,N)

D(Y,N,B,M)

D(N,N,N,N)

-->D(Y,N,N,N)<--

D(Y,N,M,M)

D(Y,M,X,X)

D(N,M,X,X)

phantom most similar to TG43

GBBS(solid model applicator, body, balloon and rectal contrast, packing contrast)

Patient\_16 D(Y,N,M,M) %difference from TG43

\*\*entire rectum overridden\*\*

left colipostat sagittal

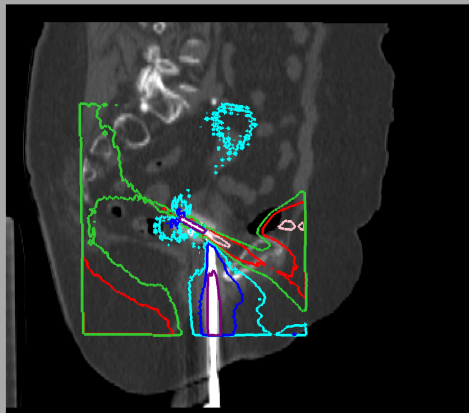

right colipostat sagittal

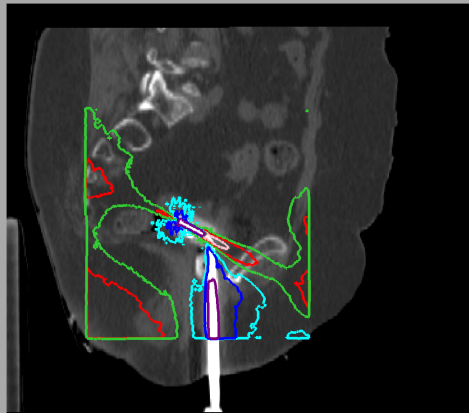

tandem sagittal

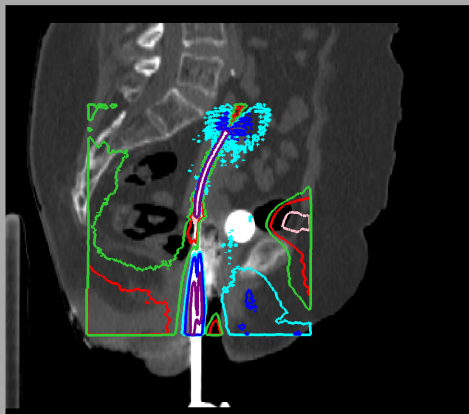

colipostats transverse

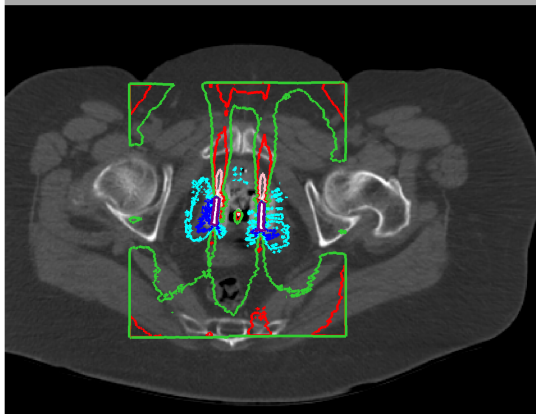

%diff from TG43



phantom least similar to TG43

D(Y,N,B,B)

D(Y,N,B,N)

D(Y,N,B,M)

D(N,N,N,N)

D(Y,N,N,N)

-->D(Y,N,M,M)<--

D(Y,M,X,X)

D(N,M,X,X)

phantom most similar to TG43

GBBS(solid model applicator, body, balloon and rectal contrast, packing contrast)

Patient\_16 D(Y,M,X,X) %difference from TG43

\*\*entire rectum overridden\*\*

left colpostat sagittal

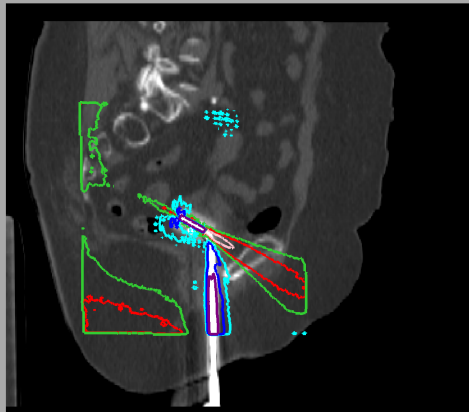

right colpostat sagittal

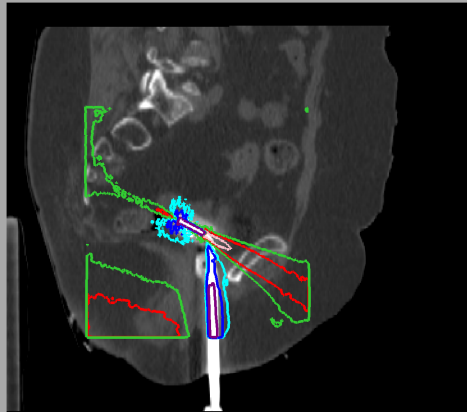

tandem sagittal

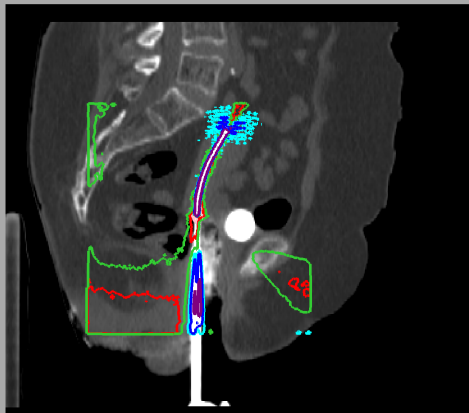

colpostats transverse

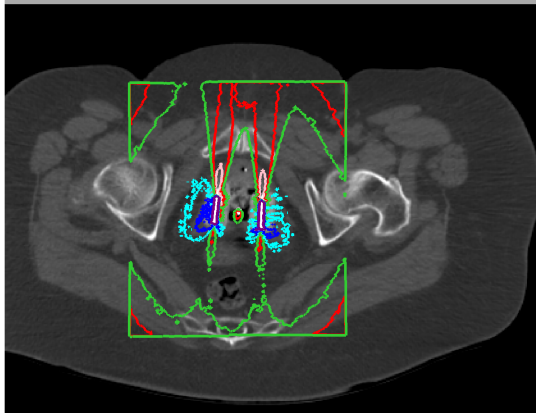

%diff from TG43

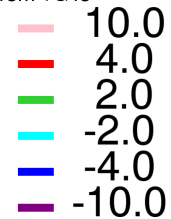

phantom least similar to TG43

D(Y,N,B,B)

D(Y,N,B,N)

D(Y,N,B,M)

D(N,N,N,N)

D(Y,N,N,N)

D(Y,N,M,M)

-->D(Y,M,X,X)<--

D(N,M,X,X)

phantom most similar to TG43

GBBS(solid model applicator, body, balloon and rectal contrast, packing contrast)



Patient\_16 D(N,M,X,X) %difference from TG43

\*\*entire rectum overridden\*\*

left colipostat sagittal

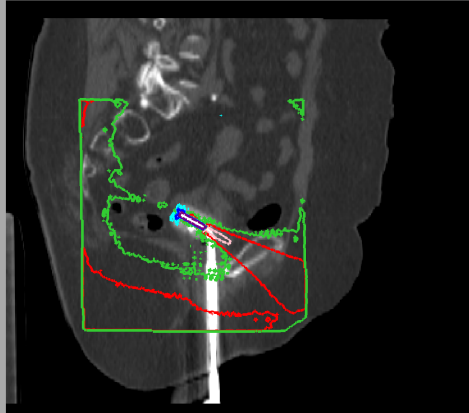

right colipostat sagittal

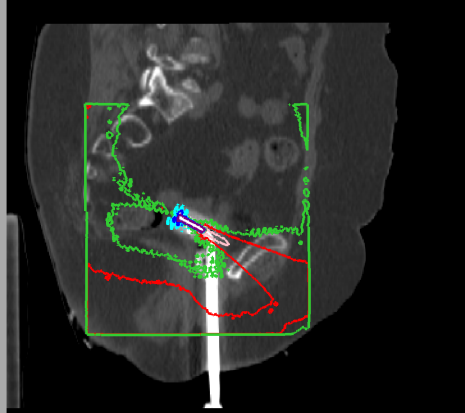

tandem sagittal

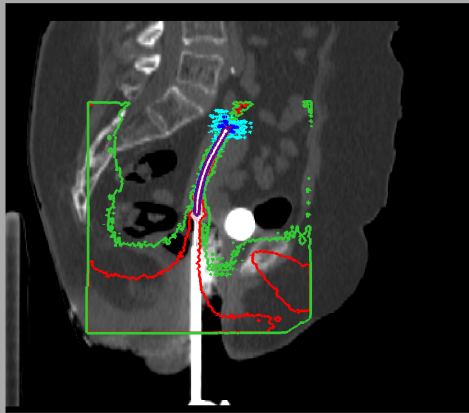

colipostats transverse

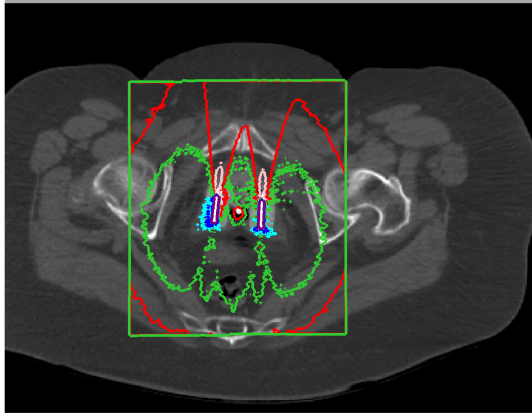

GBBS(solid model applicator, body, balloon and rectal contrast, packing contrast)

phantom least similar to TG43

D(Y,N,B,B)

D(Y,N,B,N)

D(Y,N,B,M)

D(N,N,N,N)

D(Y,N,N,N)

D(Y,N,M,M)

D(Y,M,X,X)

-->D(N,M,X,X)<--

phantom most similar to TG43

Patient\_17 D(Y,N,B,B) %difference from TG43

left colpostat sagittal

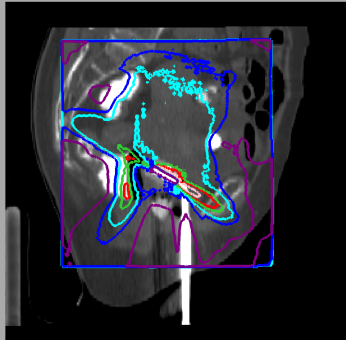

right colpostat sagittal

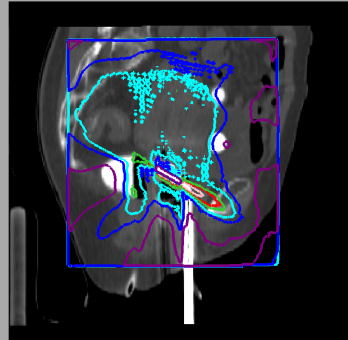

tandem sagittal

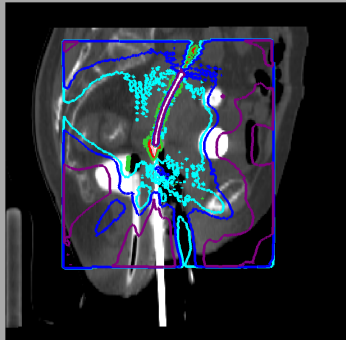

colpostats transverse

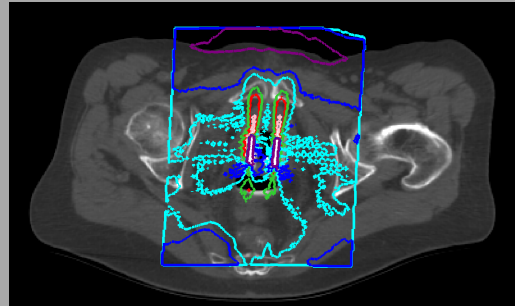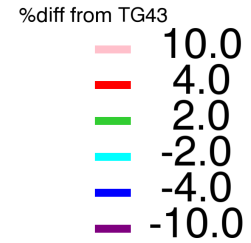

phantom least similar to TG43

-->D(Y,N,B,B)<--

D(Y,N,B,N)

D(Y,N,B,M)

D(N,N,N,N)

D(Y,N,N,N)

D(Y,N,M,M)

D(Y,M,X,X)

D(N,M,X,X)

phantom most similar to TG43

GBBS(solid model applicator, body, balloon and rectal contrast, packing contrast)

Patient\_17 D(Y,N,B,N) %difference from TG43

left colpostat sagittal

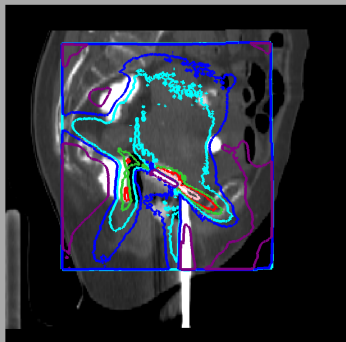

right colpostat sagittal

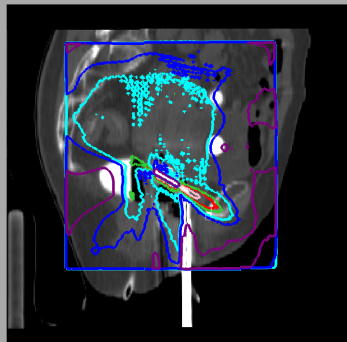

tandem sagittal

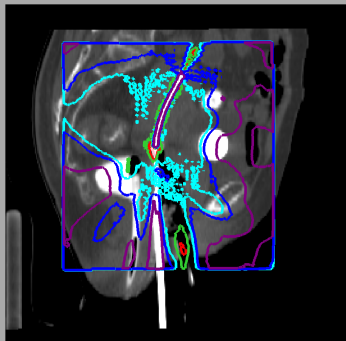

colpostats transverse

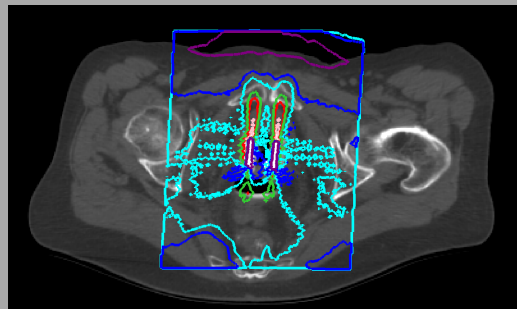

%diff from TG43



phantom least similar to TG43

D(Y,N,B,B)

-->D(Y,N,B,N)<--

D(Y,N,B,M)

D(N,N,N,N)

D(Y,N,N,N)

D(Y,N,M,M)

D(Y,M,X,X)

D(N,M,X,X)

phantom most similar to TG43

GBBS(solid model applicator, body, balloon and rectal contrast, packing contrast)

Patient\_17 D(Y,N,B,M) %difference from TG43

left colpostat sagittal

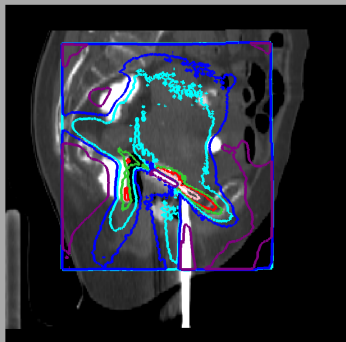

right colpostat sagittal

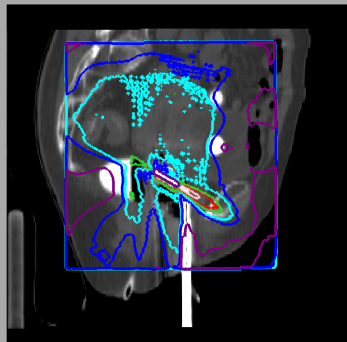

tandem sagittal

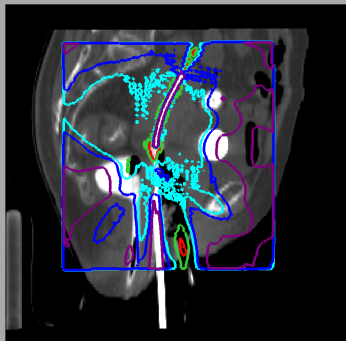

colpostats transverse

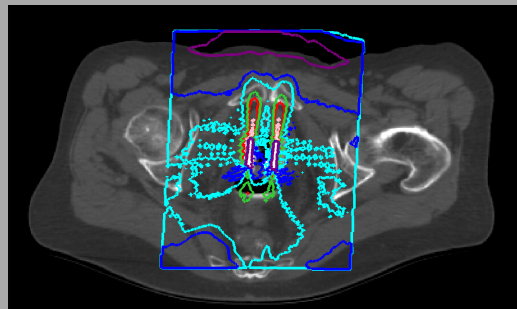

phantom least similar to TG43

D(Y,N,B,B)

D(Y,N,B,N)

-->D(Y,N,B,M)<--

D(N,N,N,N)

D(Y,N,N,N)

D(Y,N,M,M)

D(Y,M,X,X)

D(N,M,X,X)

phantom most similar to TG43

GBBS(solid model applicator, body, balloon and rectal contrast, packing contrast)

Patient\_17 D(N,N,N,N) %difference from TG43

left colpostat sagittal

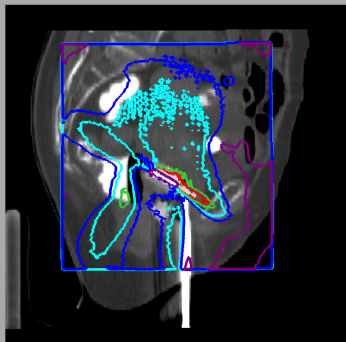

right colpostat sagittal

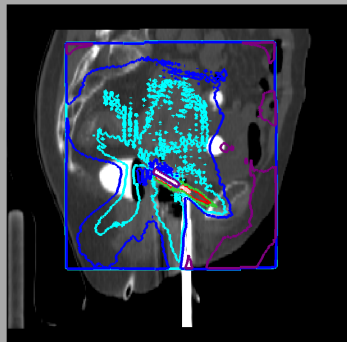

tandem sagittal

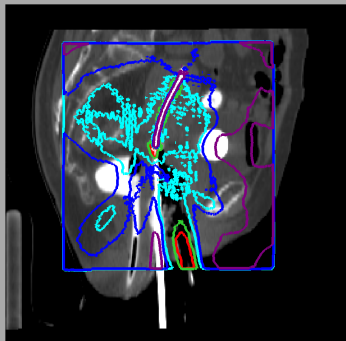

colpostats transverse

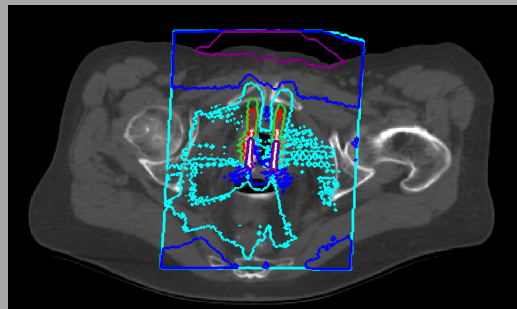

%diff from TG43

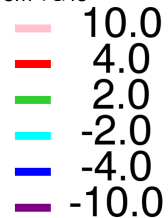

phantom least similar to TG43

D(Y,N,B,B)

D(Y,N,B,N)

D(Y,N,B,M)

-->D(N,N,N,N)<--

D(Y,N,N,N)

D(Y,N,M,M)

D(Y,M,X,X)

D(N,M,X,X)

phantom most similar to TG43

GBBS(solid model applicator, body, balloon and rectal contrast, packing contrast)

Patient\_17 D(Y,N,N,N) %difference from TG43

left colpostat sagittal

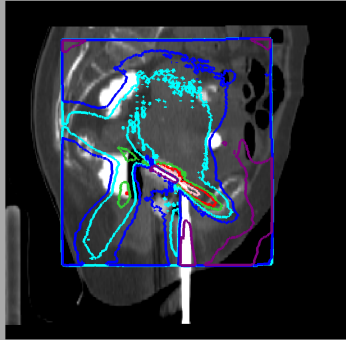

right colpostat sagittal

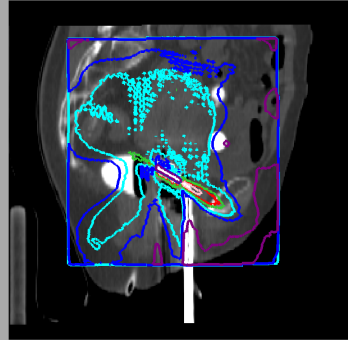

tandem sagittal

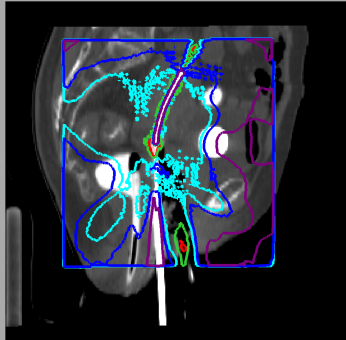

colpostats transverse

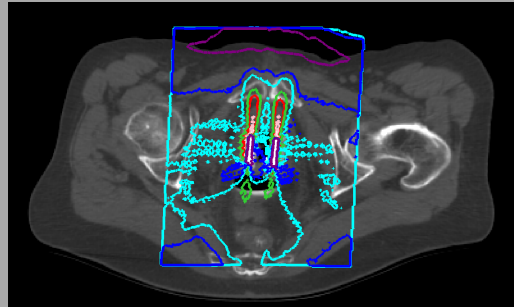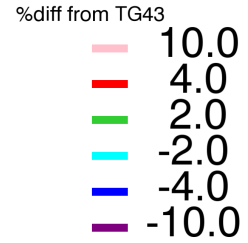

phantom least similar to TG43

D(Y,N,B,B)

D(Y,N,B,N)

D(Y,N,B,M)

D(N,N,N,N)

-->D(Y,N,N,N)<--

D(Y,N,M,M)

D(Y,M,X,X)

D(N,M,X,X)

phantom most similar to TG43

GBBS(solid model applicator, body, balloon and rectal contrast, packing contrast)

Patient\_17 D(Y,N,M,M) %difference from TG43

left colpostat sagittal

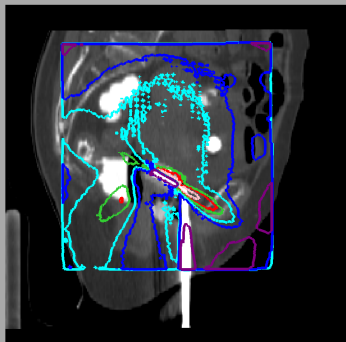

right colpostat sagittal

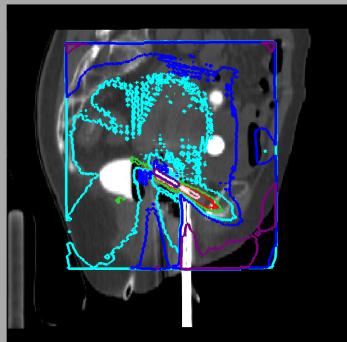

tandem sagittal

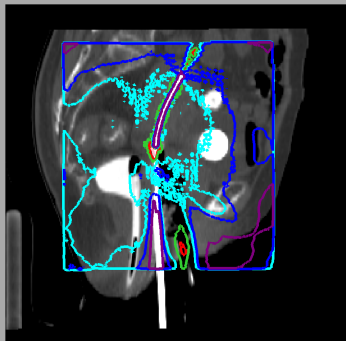

colpostats transverse

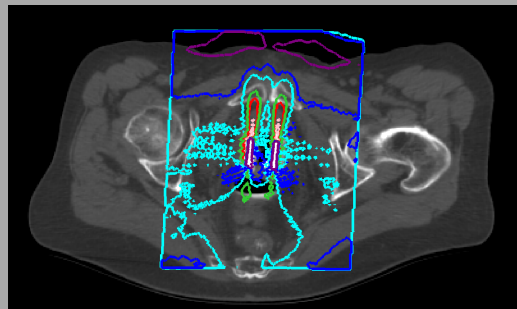

%diff from TG43



phantom least similar to TG43

D(Y,N,B,B)

D(Y,N,B,N)

D(Y,N,B,M)

D(N,N,N,N)

D(Y,N,N,N)

-->D(Y,N,M,M)<--

D(Y,M,X,X)

D(N,M,X,X)

phantom most similar to TG43

GBBS(solid model applicator, body, balloon and rectal contrast, packing contrast)

Patient\_17 D(Y,M,X,X) %difference from TG43

left colpostat sagittal

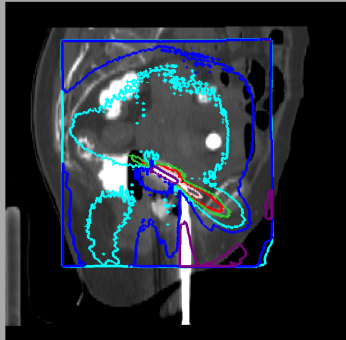

right colpostat sagittal

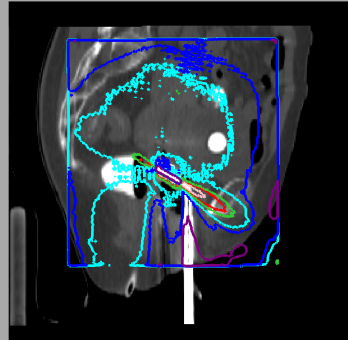

tandem sagittal

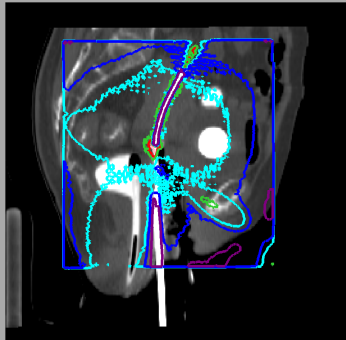

colpostats transverse

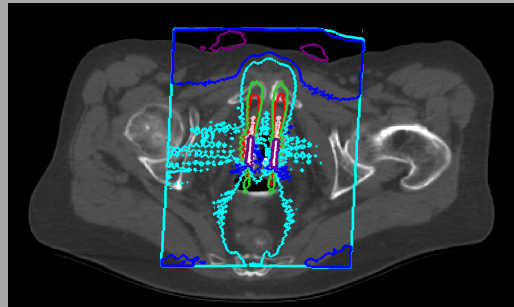

%diff from TG43

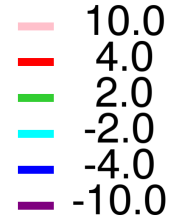

phantom least similar to TG43

D(Y,N,B,B)

D(Y,N,B,N)

D(Y,N,B,M)

D(N,N,N,N)

D(Y,N,N,N)

D(Y,N,M,M)

-->D(Y,M,X,X)<--

D(N,M,X,X)

phantom most similar to TG43

GBBS(solid model applicator, body, balloon and rectal contrast, packing contrast)



Patient\_17 D(N,M,X,X) %difference from TG43

left colpostat sagittal

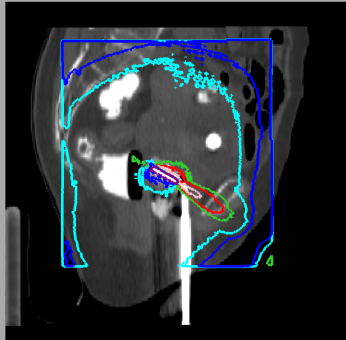

right colpostat sagittal

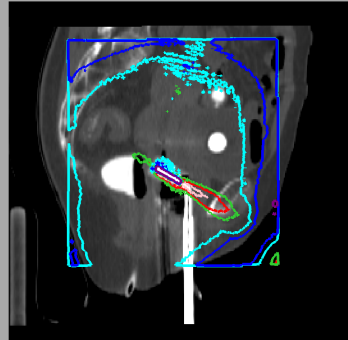

tandem sagittal

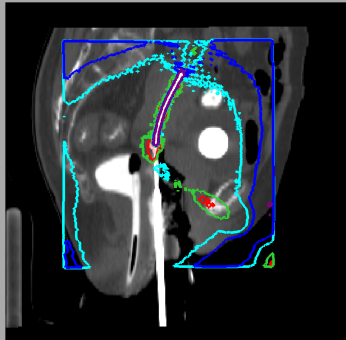

colpostats transverse

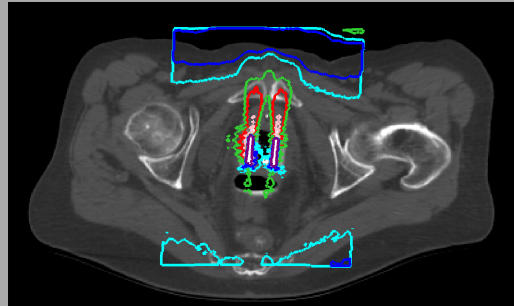

phantom least similar to TG43

D(Y,N,B,B)

D(Y,N,B,N)

D(Y,N,B,M)

D(N,N,N,N)

D(Y,N,N,N)

D(Y,N,M,M)

D(Y,M,X,X)

-->D(N,M,X,X)<--

phantom most similar to TG43

GBBS(solid model applicator, body, balloon and rectal contrast, packing contrast)

Patient\_18 D(Y,N,B,B) %difference from TG43

left colpostat sagittal

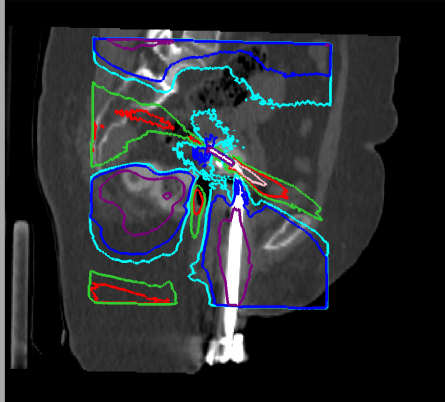

right colpostat sagittal

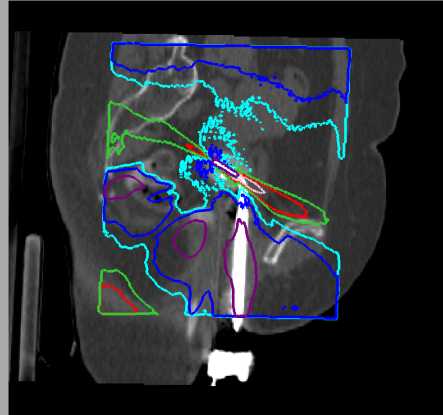

tandem sagittal

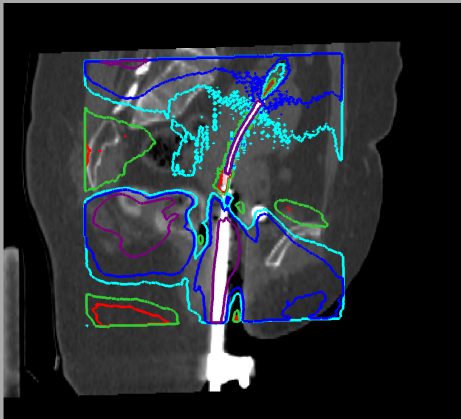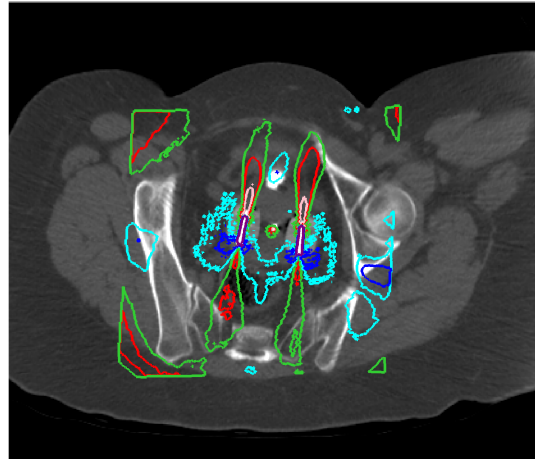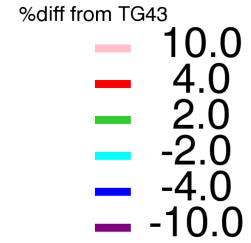

phantom least similar to TG43

-->D(Y,N,B,B)<--

D(Y,N,B,N)

D(Y,N,B,M)

D(N,N,N,N)

D(Y,N,N,N)

D(Y,N,M,M)

D(Y,M,X,X)

D(N,M,X,X)

phantom most similar to TG43

GBBS(solid model applicator, body, balloon and rectal contrast, packing contrast)

Patient\_18 D(Y,N,B,N) %difference from TG43

left colpostat sagittal

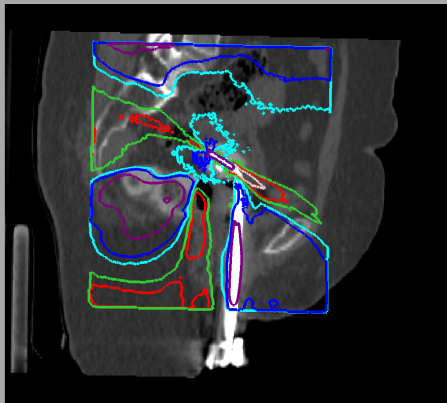

right colpostat sagittal

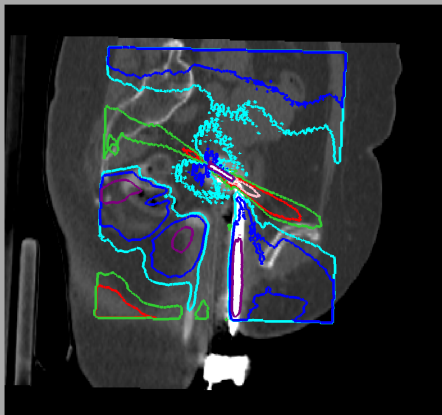

tandem sagittal

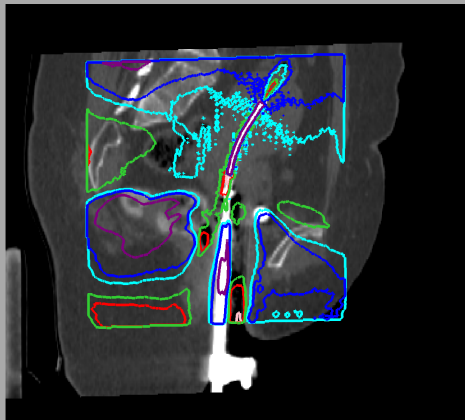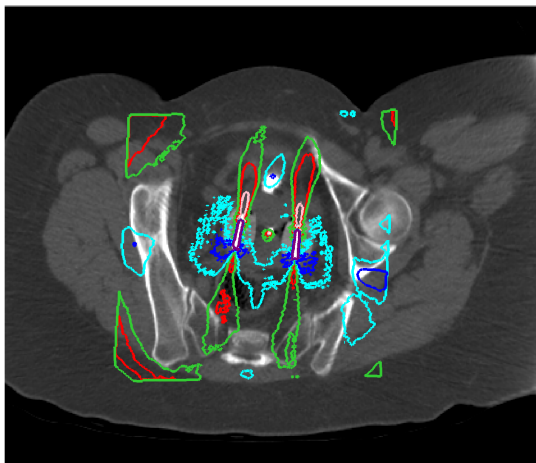

%diff from TG43



phantom least similar to TG43

D(Y,N,B,B)

-->D(Y,N,B,N)<--

D(Y,N,B,M)

D(N,N,N,N)

D(Y,N,N,N)

D(Y,N,M,M)

D(Y,M,X,X)

D(N,M,X,X)

phantom most similar to TG43

GBBS(solid model applicator, body, balloon and rectal contrast, packing contrast)

Patient\_18 D(Y,N,B,M) %difference from TG43

left colpostat sagittal

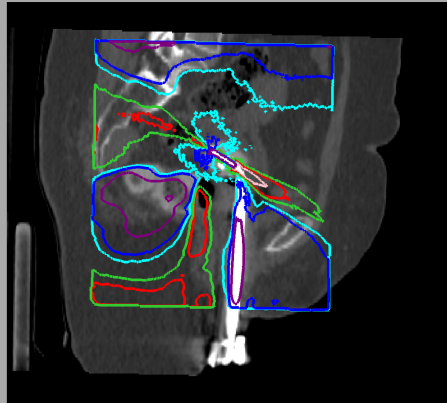

right colpostat sagittal

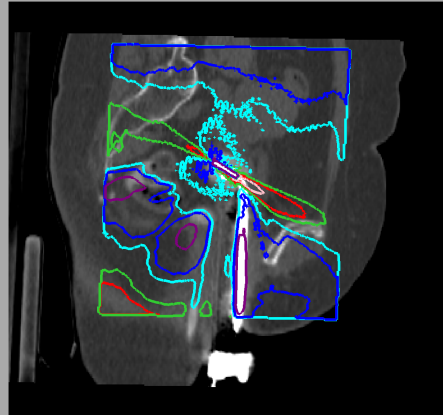

tandem sagittal

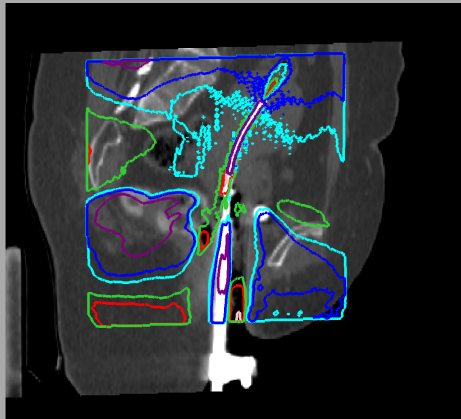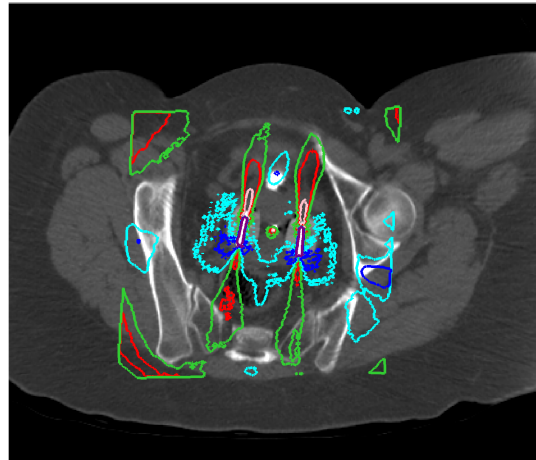

phantom least similar to TG43

D(Y,N,B,B)

D(Y,N,B,N)

-->D(Y,N,B,M)<--

D(N,N,N,N)

D(Y,N,N,N)

D(Y,N,M,M)

D(Y,M,X,X)

D(N,M,X,X)

phantom most similar to TG43

GBBS(solid model applicator, body, balloon and rectal contrast, packing contrast)

Patient\_18 D(N,N,N,N) %difference from TG43

left colpostat sagittal

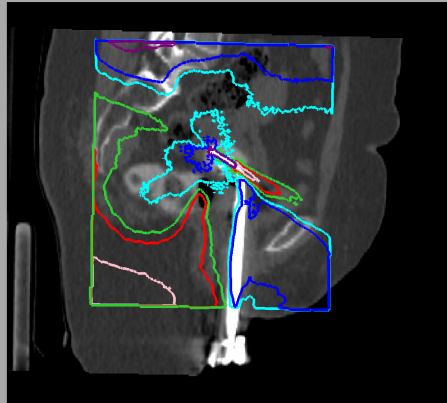

right colpostat sagittal

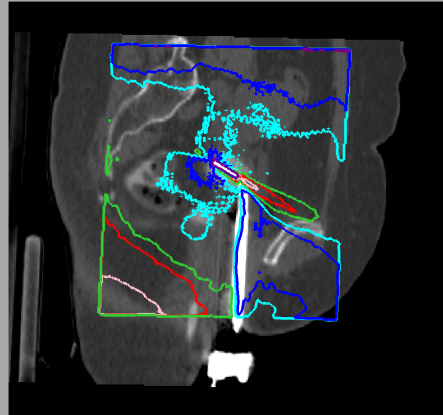

tandem sagittal

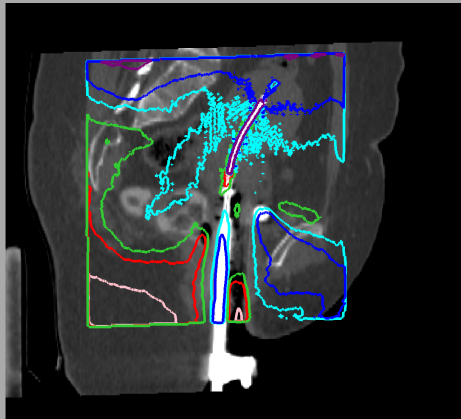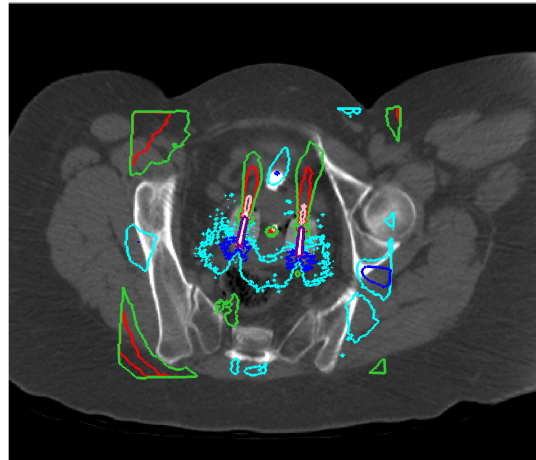

phantom least similar to TG43

D(Y,N,B,B)

D(Y,N,B,N)

D(Y,N,B,M)

-->D(N,N,N,N)<--

D(Y,N,N,N)

D(Y,N,M,M)

D(Y,M,X,X)

D(N,M,X,X)

phantom most similar to TG43

GBBS(solid model applicator, body, balloon and rectal contrast, packing contrast)

Patient\_18 D(Y,N,N,N) %difference from TG43

left colpostat sagittal

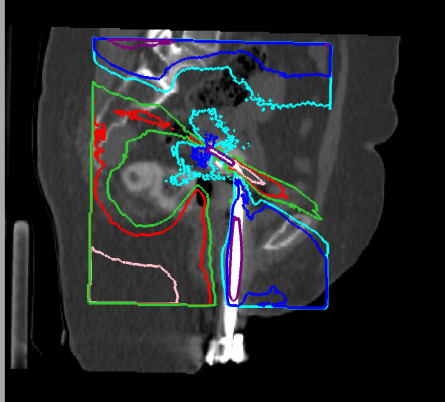

right colpostat sagittal

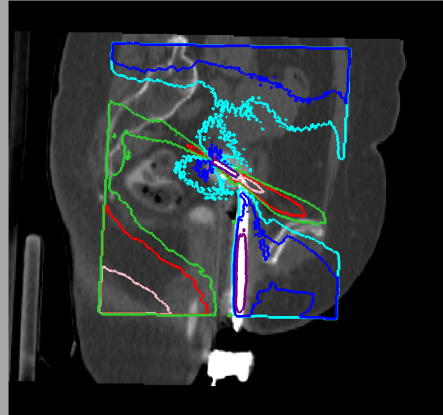

tandem sagittal

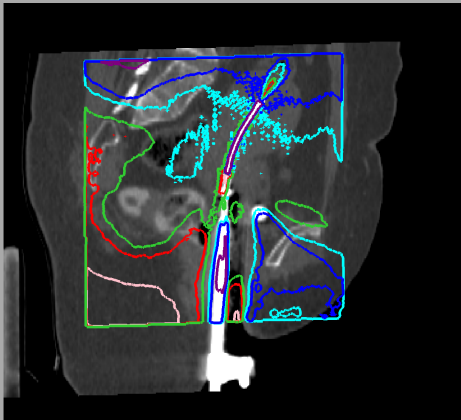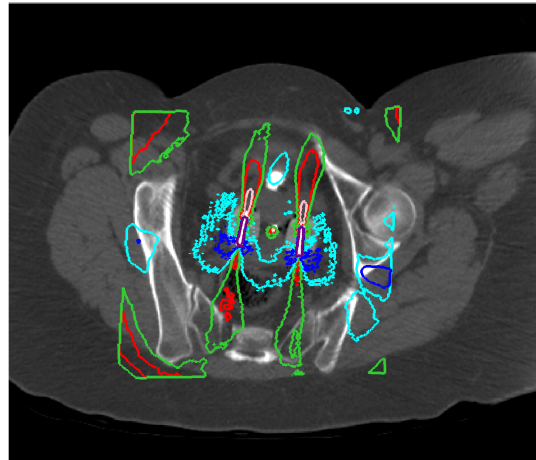

phantom least similar to TG43

D(Y,N,B,B)

D(Y,N,B,N)

D(Y,N,B,M)

D(N,N,N,N)

-->D(Y,N,N,N)<--

D(Y,N,M,M)

D(Y,M,X,X)

D(N,M,X,X)

phantom most similar to TG43

GBBS(solid model applicator, body, balloon and rectal contrast, packing contrast)

Patient\_18 D(Y,N,M,M) %difference from TG43

left colpostat sagittal

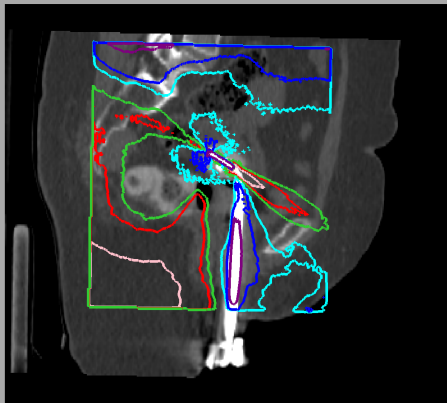

right colpostat sagittal

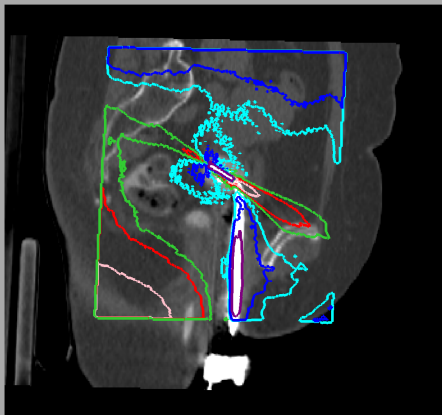

tandem sagittal

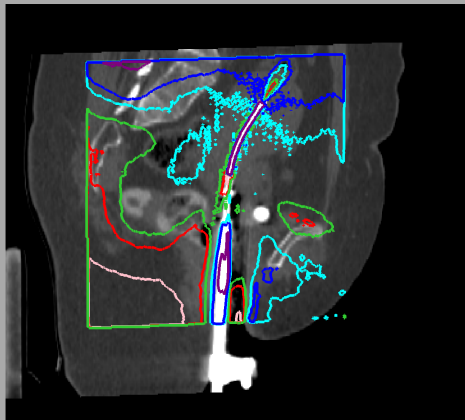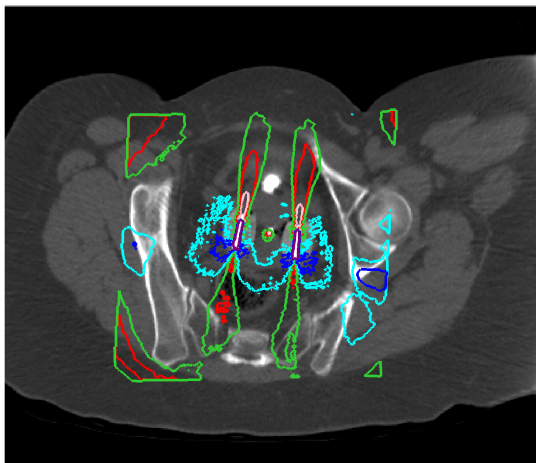

%diff from TG43



phantom least similar to TG43

D(Y,N,B,B)

D(Y,N,B,N)

D(Y,N,B,M)

D(N,N,N,N)

D(Y,N,N,N)

-->D(Y,N,M,M)<--

D(Y,M,X,X)

D(N,M,X,X)

phantom most similar to TG43

GBBS(solid model applicator, body, balloon and rectal contrast, packing contrast)

Patient\_18 D(Y,M,X,X) %difference from TG43

left colpostat sagittal

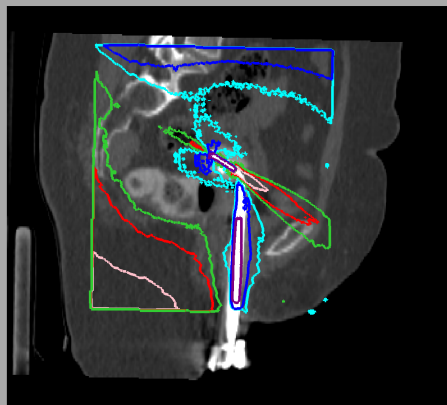

right colpostat sagittal

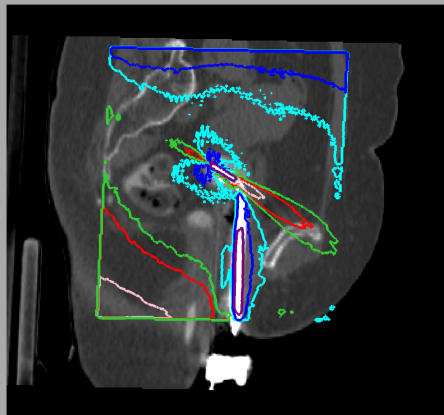

tandem sagittal

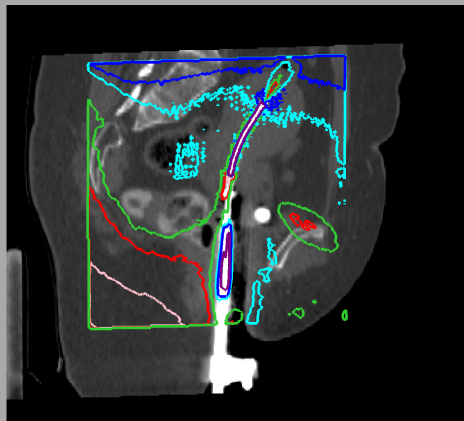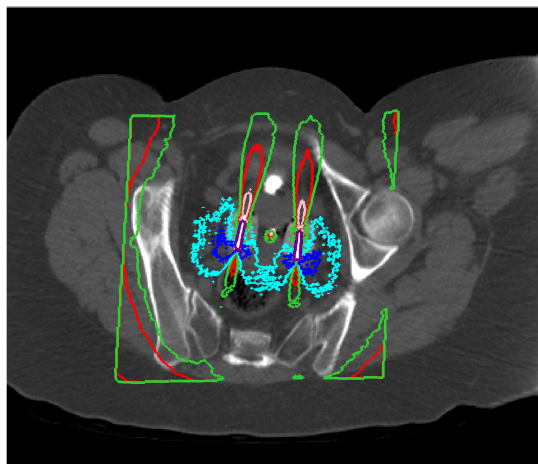

%diff from TG43



phantom least similar to TG43

D(Y,N,B,B)

D(Y,N,B,N)

D(Y,N,B,M)

D(N,N,N,N)

D(Y,N,N,N)

D(Y,N,M,M)

-->D(Y,M,X,X)<--

D(N,M,X,X)

phantom most similar to TG43

GBBS(solid model applicator, body, balloon and rectal contrast, packing contrast)



Patient\_18 D(N,M,X,X) %difference from TG43

left colpostat sagittal

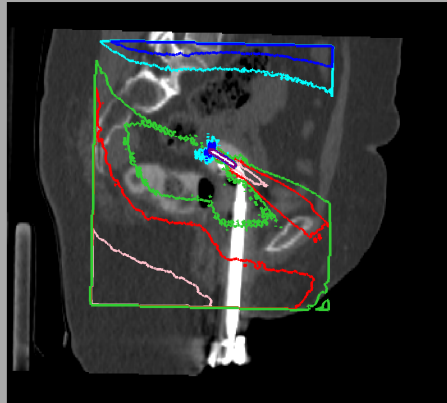

right colpostat sagittal

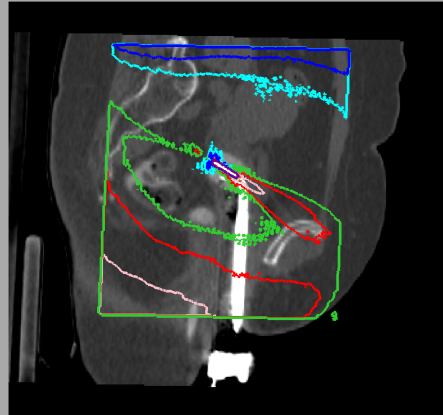

tandem sagittal

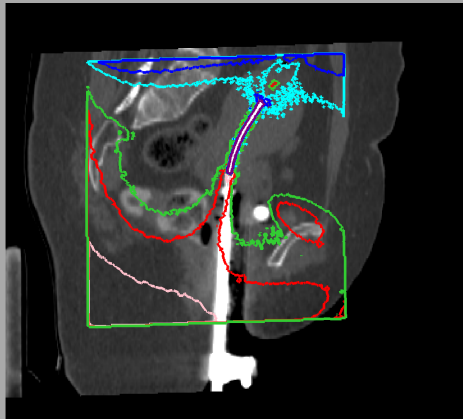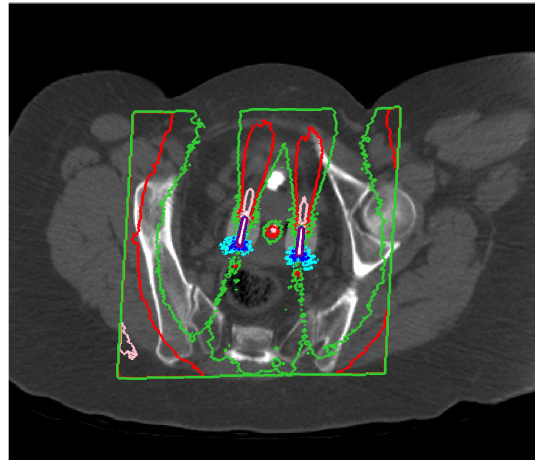

%diff from TG43

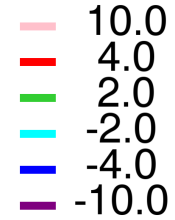

phantom least similar to TG43

D(Y,N,B,B)

D(Y,N,B,N)

D(Y,N,B,M)

D(N,N,N,N)

D(Y,N,N,N)

D(Y,N,M,M)

D(Y,M,X,X)

-->D(N,M,X,X)<--

phantom most similar to TG43

GBBS(solid model applicator, body, balloon and rectal contrast, packing contrast)

Patient\_19 D(Y,N,B,B) %difference from TG43

\*\*entire rectum overridden\*\*

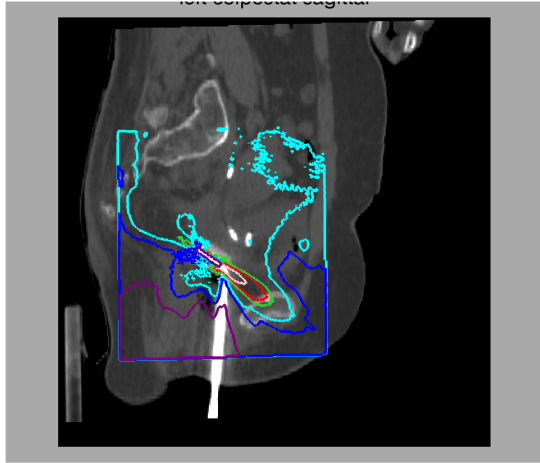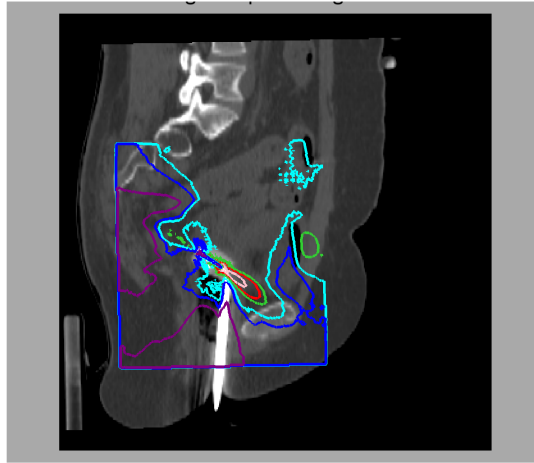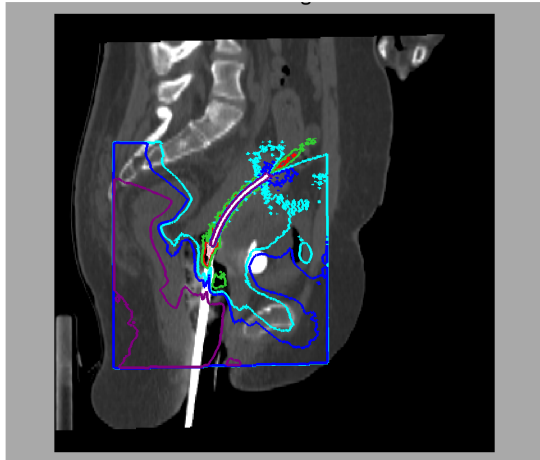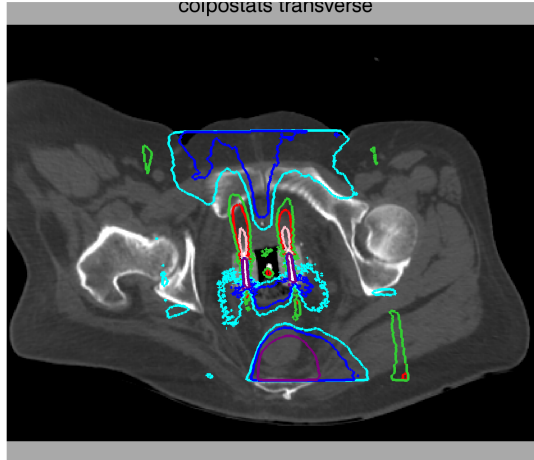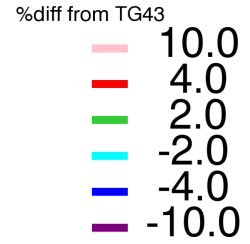

phantom least similar to TG43

-->D(Y,N,B,B)<--

D(Y,N,B,N)

D(Y,N,B,M)

D(N,N,N,N)

D(Y,N,N,N)

D(Y,N,M,M)

D(Y,M,X,X)

D(N,M,X,X)

phantom most similar to TG43

GBBS(solid model applicator, body, balloon and rectal contrast, packing contrast)

Patient\_19 D(Y,N,B,N) %difference from TG43

\*\*entire rectum overridden\*\*

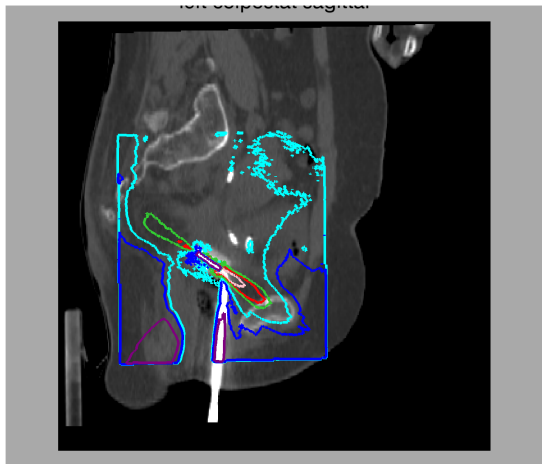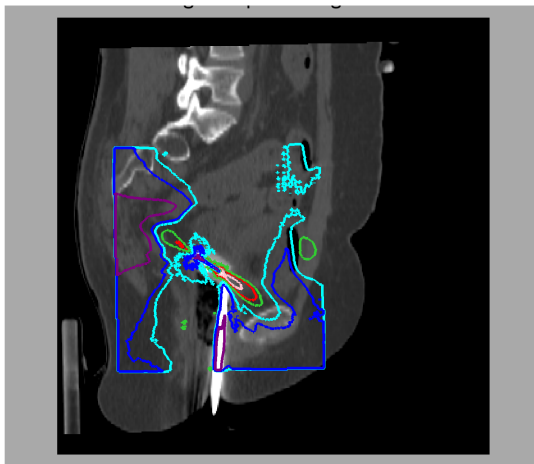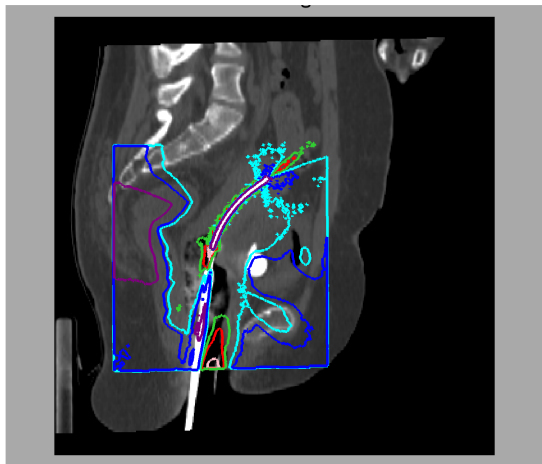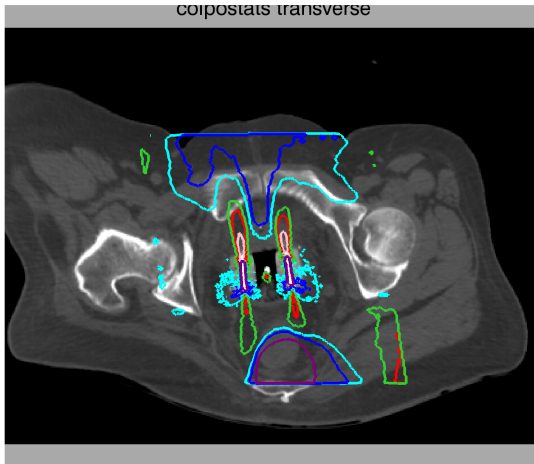

%diff from TG43



GBBS(solid model applicator, body, balloon and rectal contrast, packing contrast)

phantom least similar to TG43

D(Y,N,B,B)

-->D(Y,N,B,N)<--

D(Y,N,B,M)

D(N,N,N,N)

D(Y,N,N,N)

D(Y,N,M,M)

D(Y,M,X,X)

D(N,M,X,X)

phantom most similar to TG43

Patient\_19 D(Y,N,B,M) %difference from TG43

\*\*entire rectum overridden\*\*

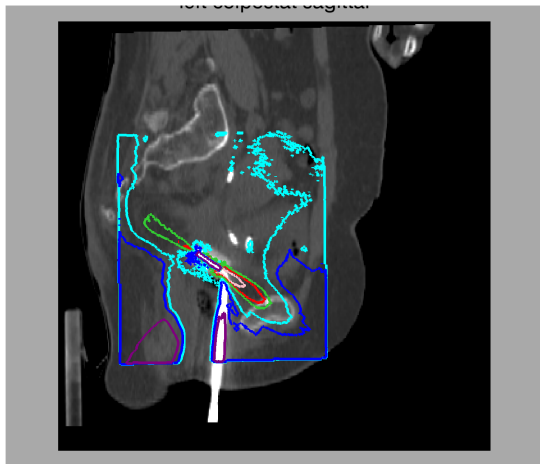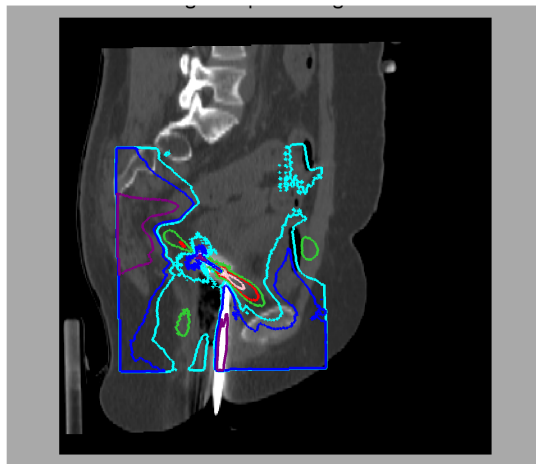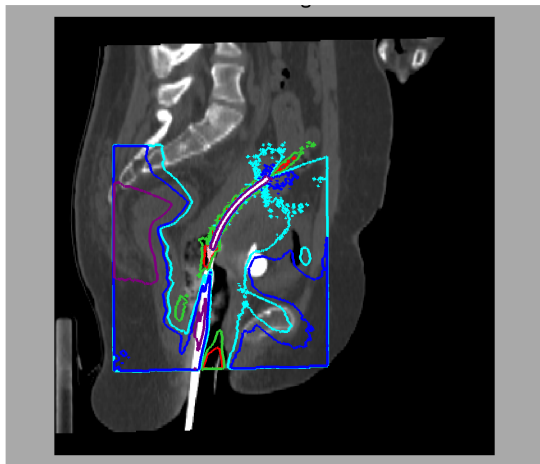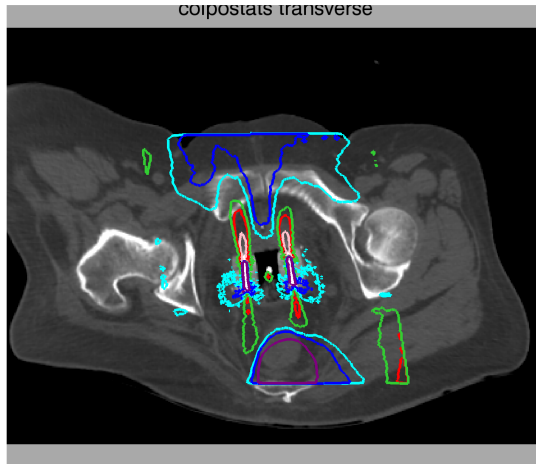

phantom least similar to TG43

D(Y,N,B,B)

D(Y,N,B,N)

-->D(Y,N,B,M)<--

D(N,N,N,N)

D(Y,N,N,N)

D(Y,N,M,M)

D(Y,M,X,X)

D(N,M,X,X)

phantom most similar to TG43

GBBS(solid model applicator, body, balloon and rectal contrast, packing contrast)

Patient\_19 D(N,N,N,N) %difference from TG43

\*\*entire rectum overridden\*\*

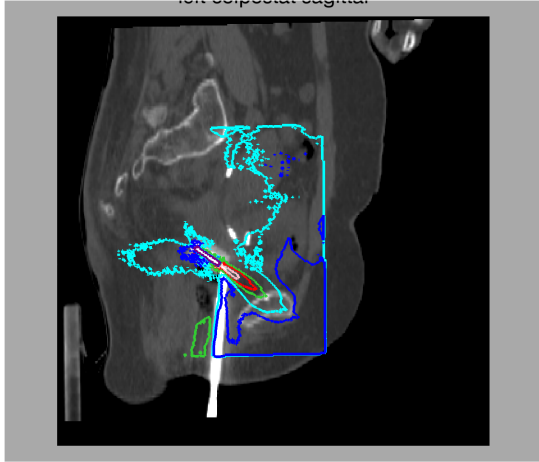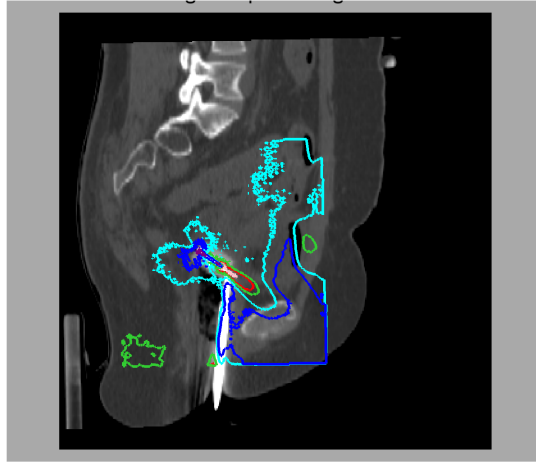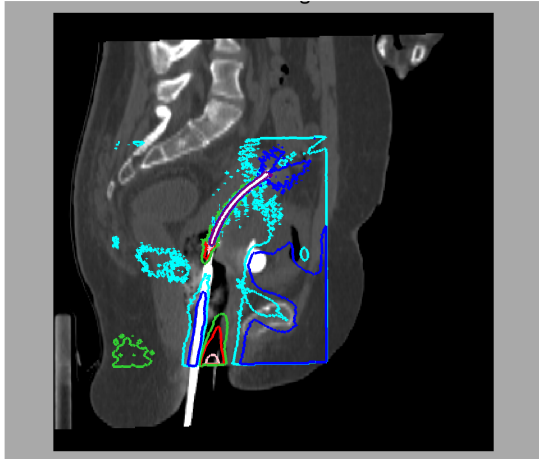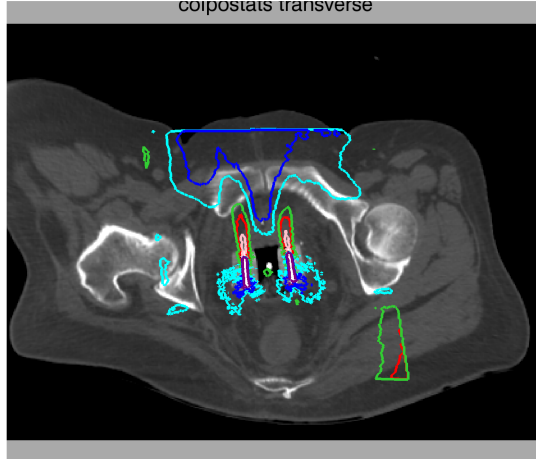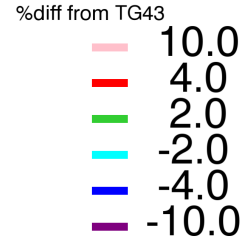

phantom least similar to TG43

D(Y,N,B,B)

D(Y,N,B,N)

D(Y,N,B,M)

-->D(N,N,N,N)<--

D(Y,N,N,N)

D(Y,N,M,M)

D(Y,M,X,X)

D(N,M,X,X)

phantom most similar to TG43

GBBS(solid model applicator, body, balloon and rectal contrast, packing contrast)

Patient\_19 D(Y,N,N,N) %difference from TG43

\*\*entire rectum overridden\*\*

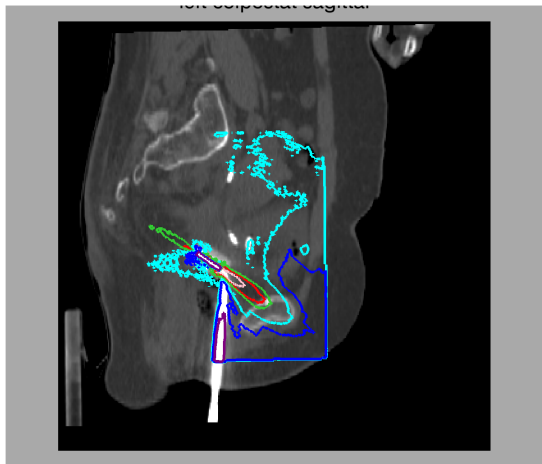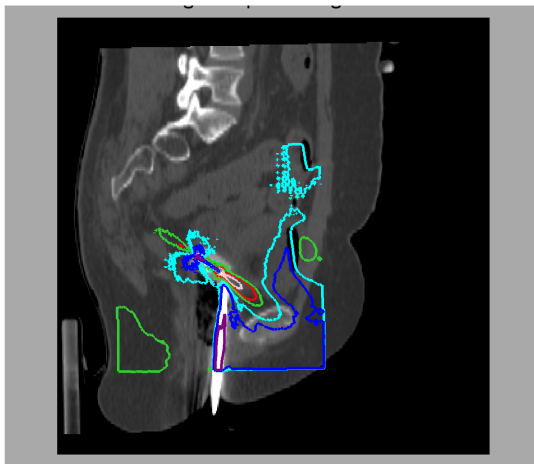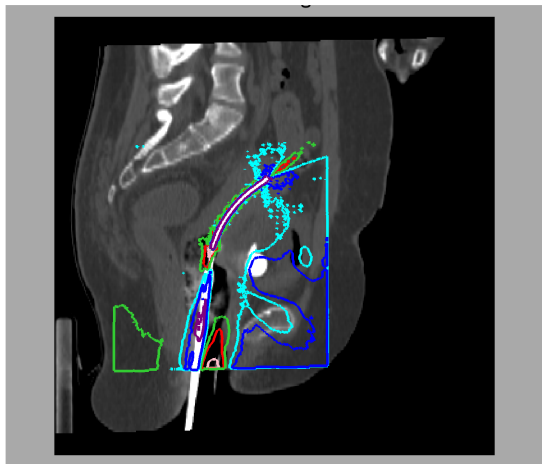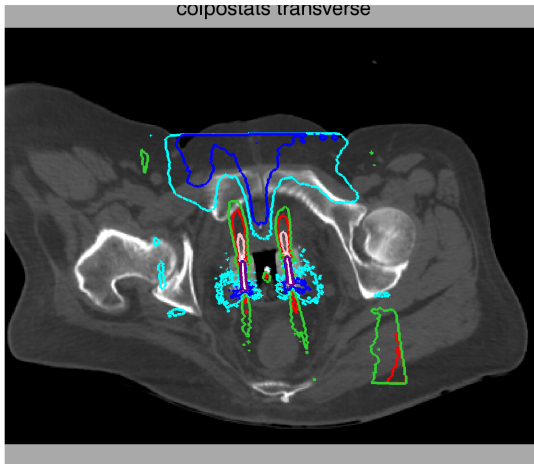

%diff from TG43



GBBS(solid model applicator, body, balloon and rectal contrast, packing contrast)

phantom least similar to TG43

D(Y,N,B,B)

D(Y,N,B,N)

D(Y,N,B,M)

D(N,N,N,N)

-->D(Y,N,N,N)<--

D(Y,N,M,M)

D(Y,M,X,X)

D(N,M,X,X)

phantom most similar to TG43

Patient\_19 D(Y,N,M,M) %difference from TG43

\*\*entire rectum overridden\*\*

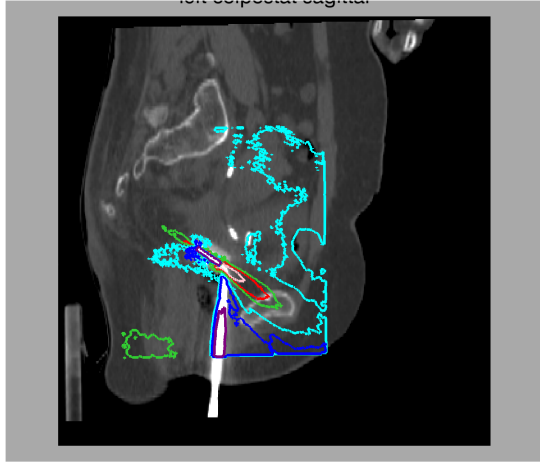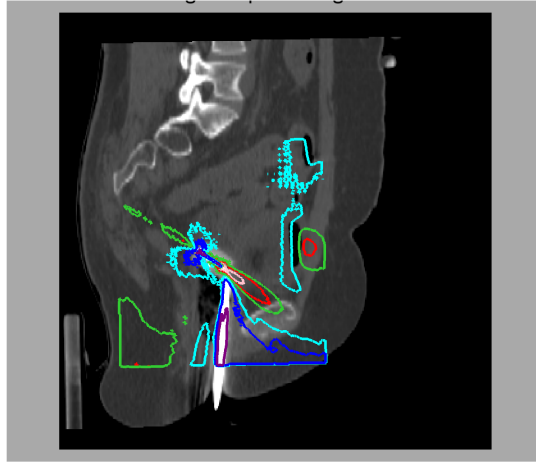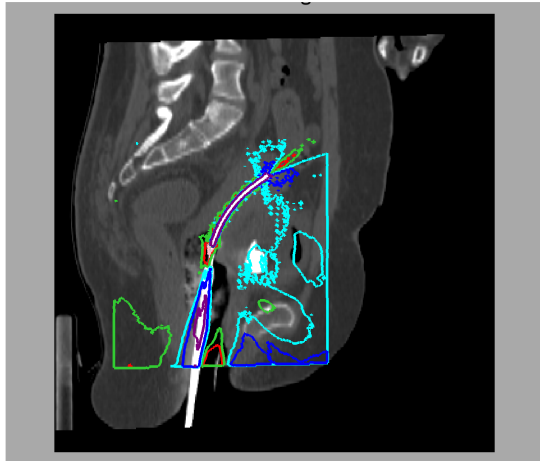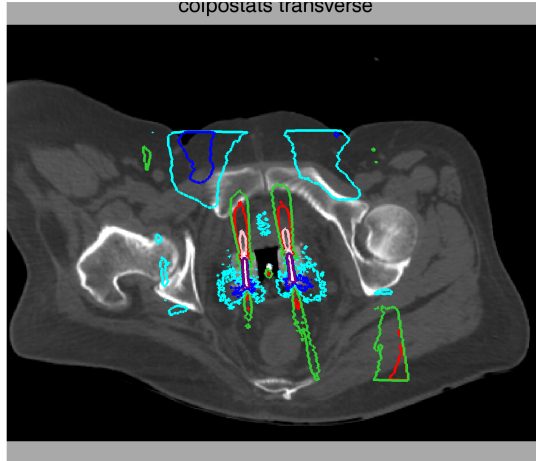

phantom least similar to TG43

D(Y,N,B,B)

D(Y,N,B,N)

D(Y,N,B,M)

D(N,N,N,N)

D(Y,N,N,N)

-->D(Y,N,M,M)<--

D(Y,M,X,X)

D(N,M,X,X)

phantom most similar to TG43

GBBS(solid model applicator, body, balloon and rectal contrast, packing contrast)

Patient\_19 D(Y,M,X,X) %difference from TG43

\*\*entire rectum overridden\*\*

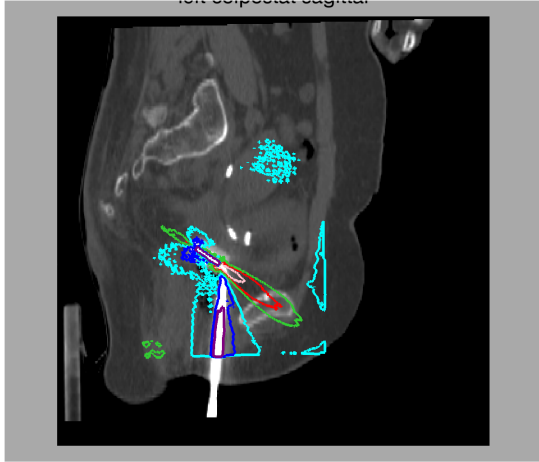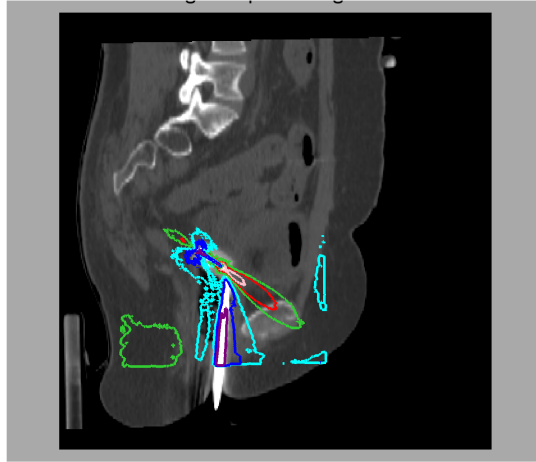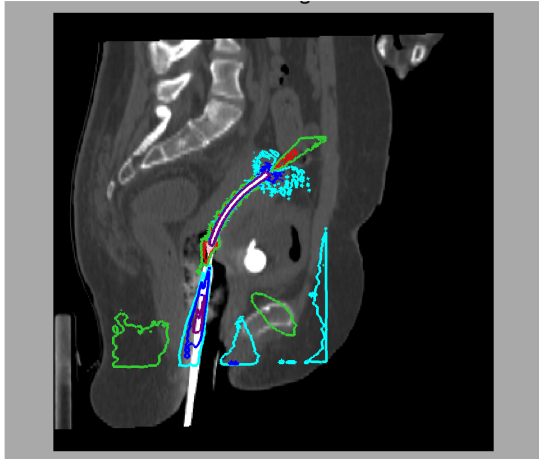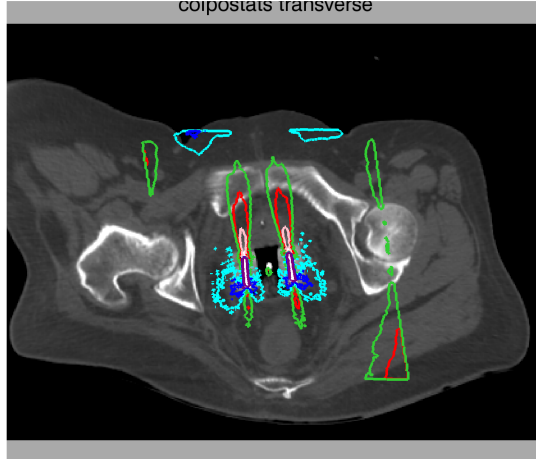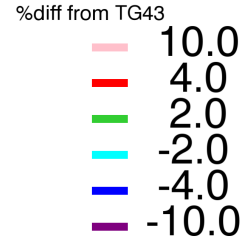

phantom least similar to TG43

D(Y,N,B,B)

D(Y,N,B,N)

D(Y,N,B,M)

D(N,N,N,N)

D(Y,N,N,N)

D(Y,N,M,M)

-->D(Y,M,X,X)<--

D(N,M,X,X)

phantom most similar to TG43

GBBS(solid model applicator, body, balloon and rectal contrast, packing contrast)



Patient\_19 D(N,M,X,X) %difference from TG43

\*\*entire rectum overridden\*\*

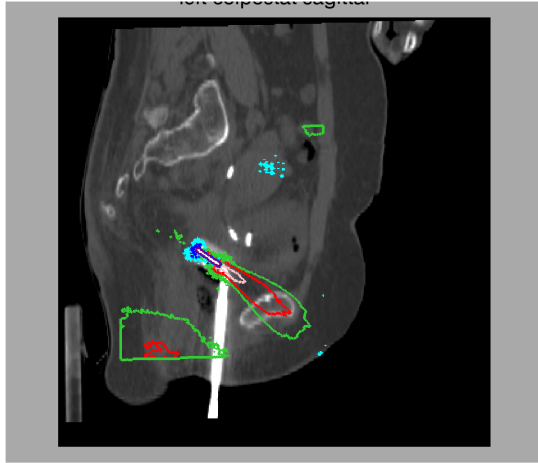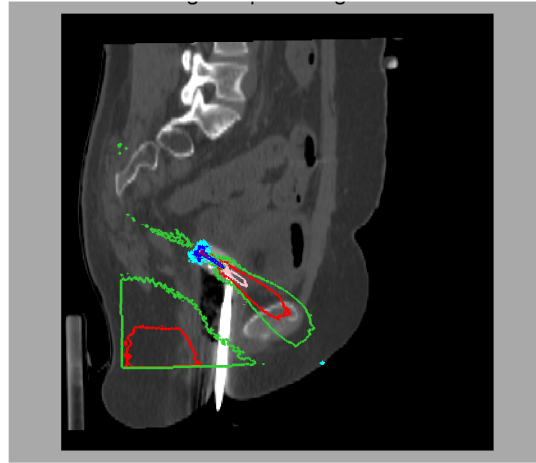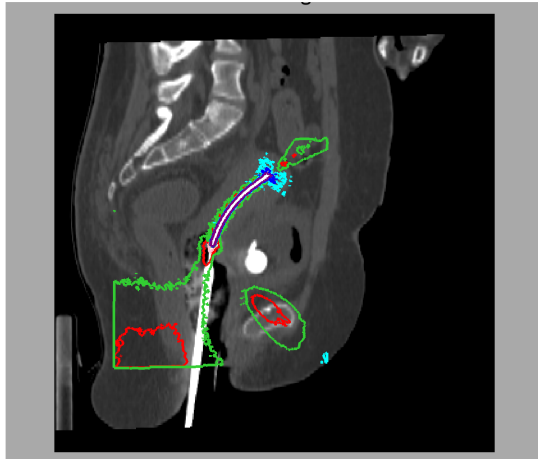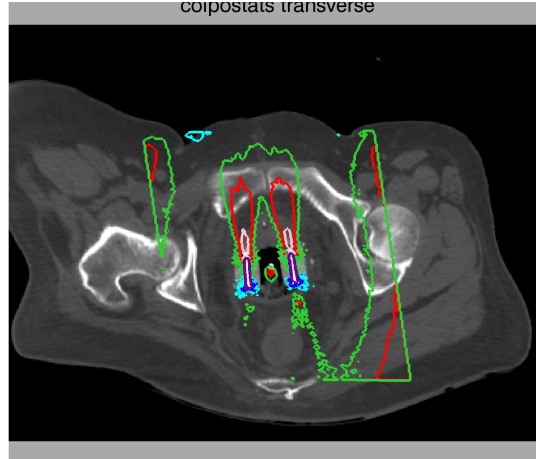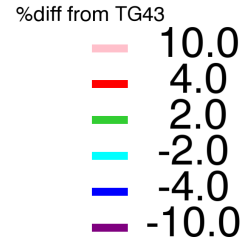

phantom least similar to TG43

D(Y,N,B,B)

D(Y,N,B,N)

D(Y,N,B,M)

D(N,N,N,N)

D(Y,N,N,N)

D(Y,N,M,M)

D(Y,M,X,X)

-->D(N,M,X,X)<--

phantom most similar to TG43

GBBS(solid model applicator, body, balloon and rectal contrast, packing contrast)

Patient\_20 D(Y,N,B,B) %difference from TG43

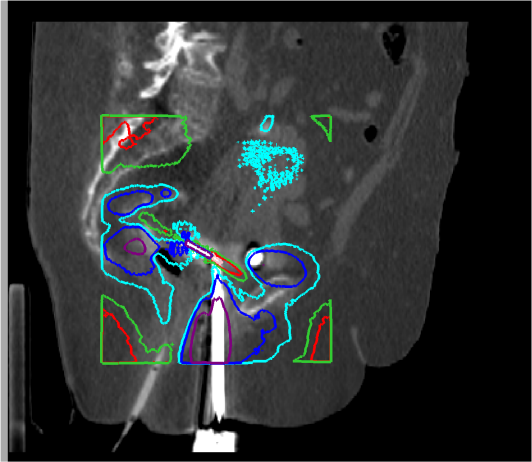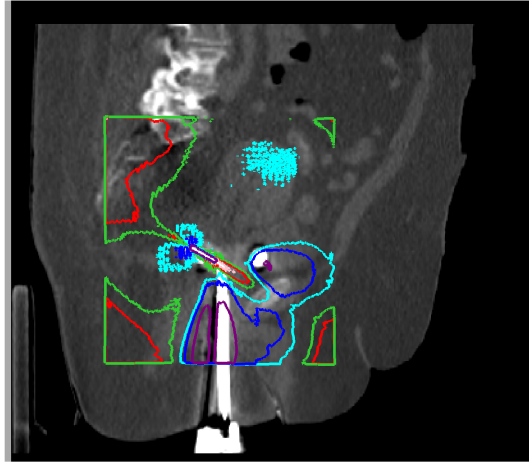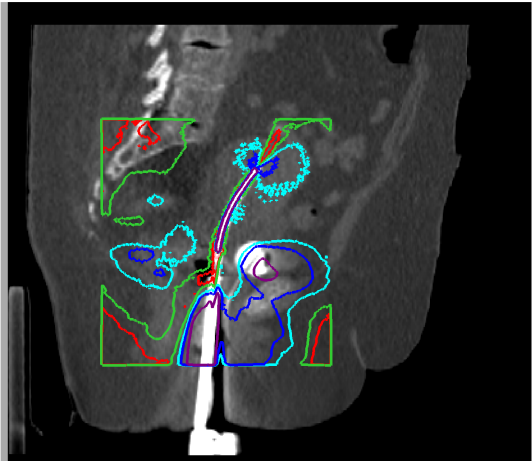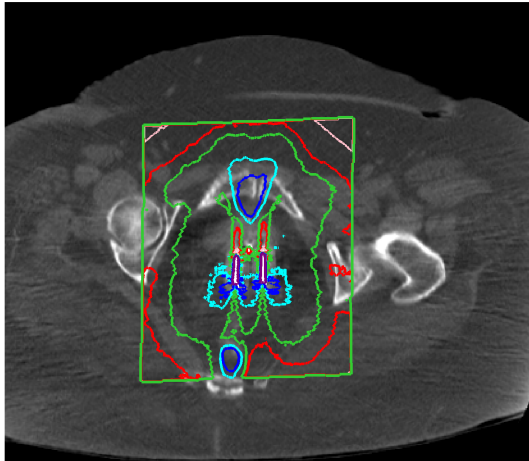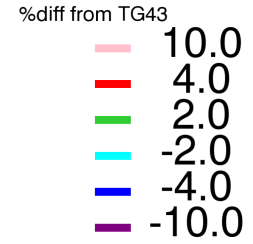

phantom least similar to TG43

-->D(Y,N,B,B)<--

D(Y,N,B,N)

D(Y,N,B,M)

D(N,N,N,N)

D(Y,N,N,N)

D(Y,N,M,M)

D(Y,M,X,X)

D(N,M,X,X)

phantom most similar to TG43

GBBS(solid model applicator, body, balloon and rectal contrast, packing contrast)

Patient\_20 D(Y,N,B,N) %difference from TG43

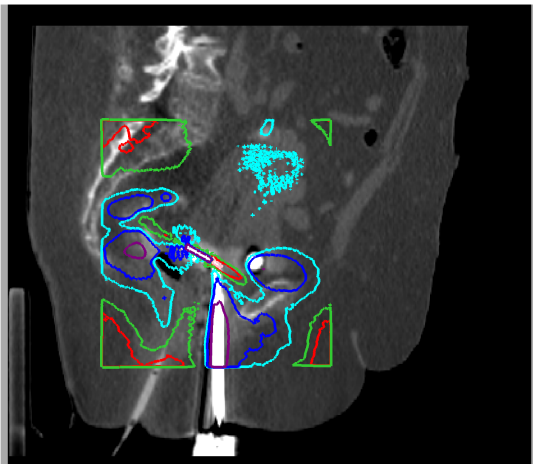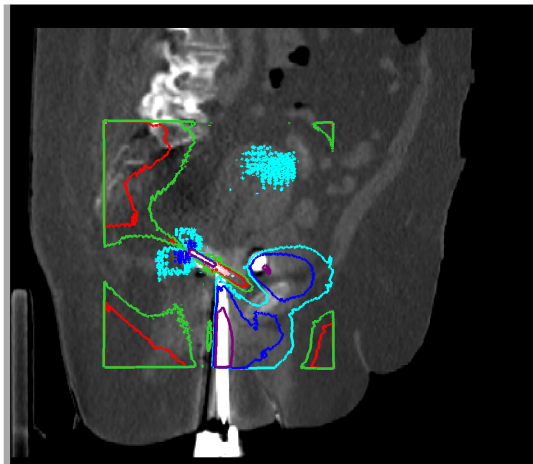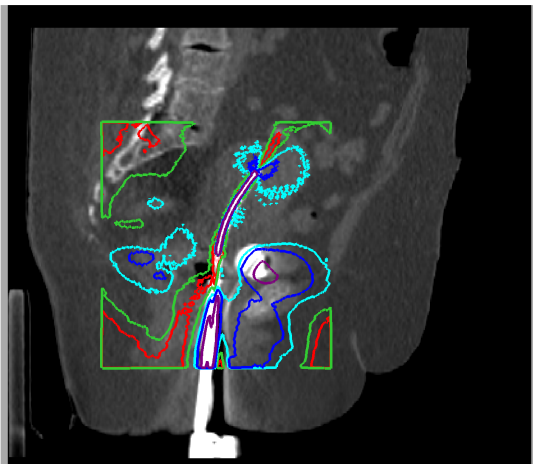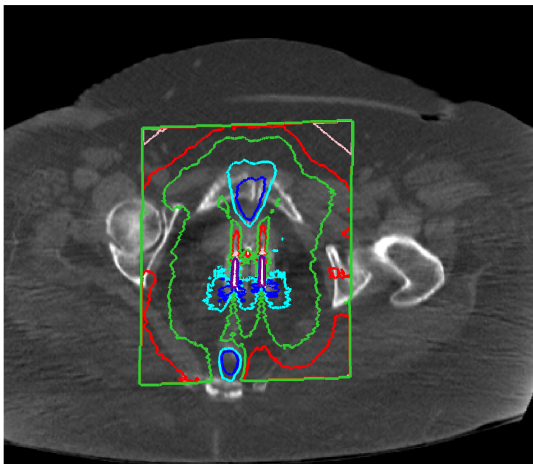

%diff from TG43



phantom least similar to TG43

D(Y,N,B,B)

-->D(Y,N,B,N)<--

D(Y,N,B,M)

D(N,N,N,N)

D(Y,N,N,N)

D(Y,N,M,M)

D(Y,M,X,X)

D(N,M,X,X)

phantom most similar to TG43

GBBS(solid model applicator, body, balloon and rectal contrast, packing contrast)

Patient\_20 D(Y,N,B,M) %difference from TG43

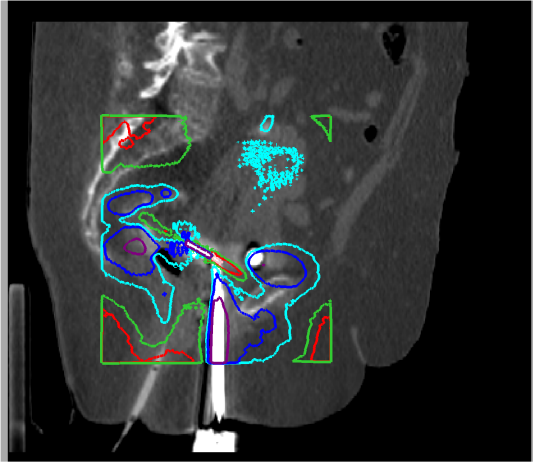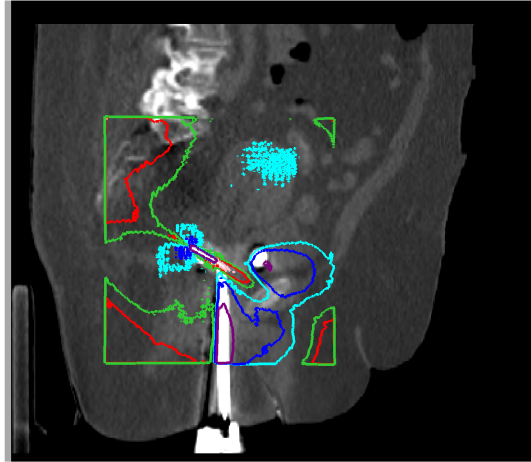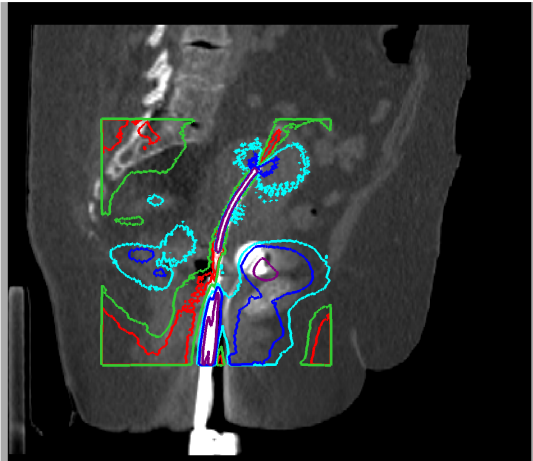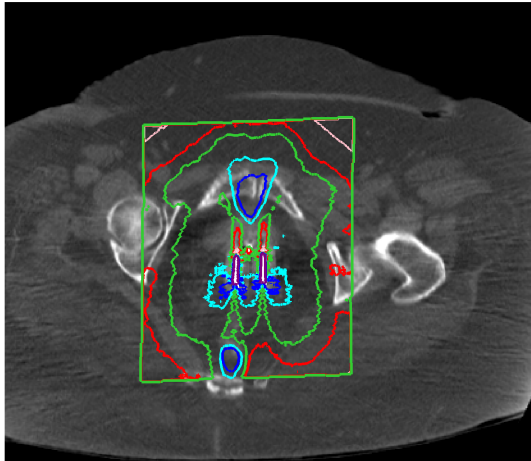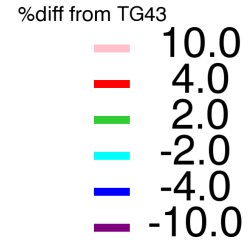

phantom least similar to TG43

D(Y,N,B,B)

D(Y,N,B,N)

-->D(Y,N,B,M)<--

D(N,N,N,N)

D(Y,N,N,N)

D(Y,N,M,M)

D(Y,M,X,X)

D(N,M,X,X)

phantom most similar to TG43

GBBS(solid model applicator, body, balloon and rectal contrast, packing contrast)

Patient\_20 D(N,N,N,N) %difference from TG43

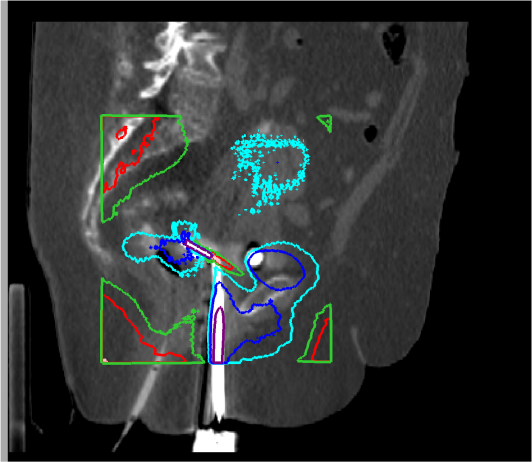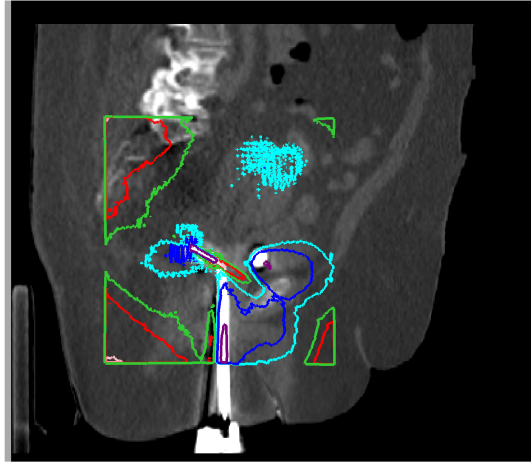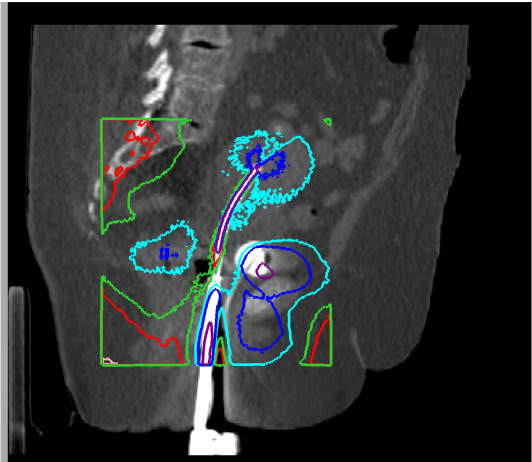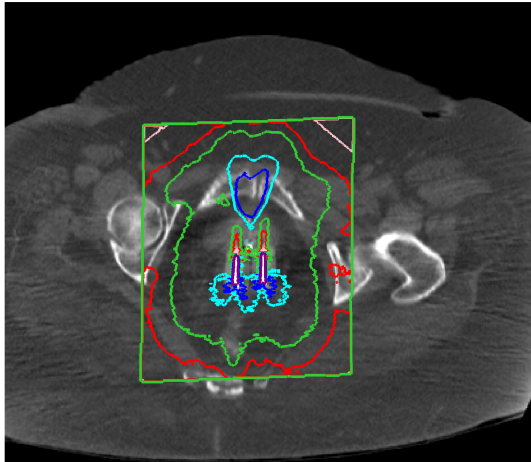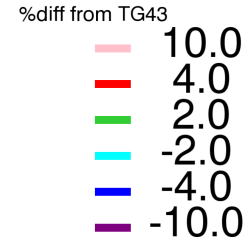

phantom least similar to TG43

D(Y,N,B,B)

D(Y,N,B,N)

D(Y,N,B,M)

-->D(N,N,N,N)<--

D(Y,N,N,N)

D(Y,N,M,M)

D(Y,M,X,X)

D(N,M,X,X)

phantom most similar to TG43

GBBS(solid model applicator, body, balloon and rectal contrast, packing contrast)

Patient\_20 D(Y,N,N,N) %difference from TG43

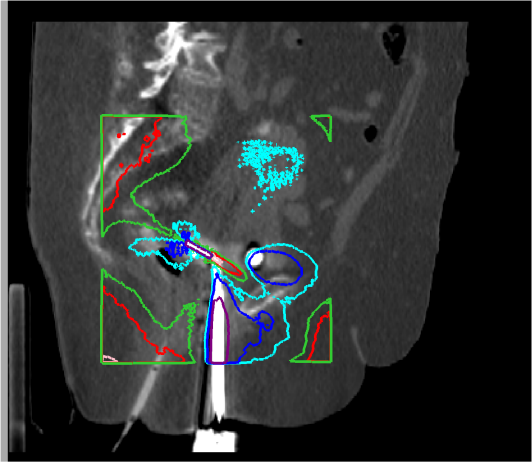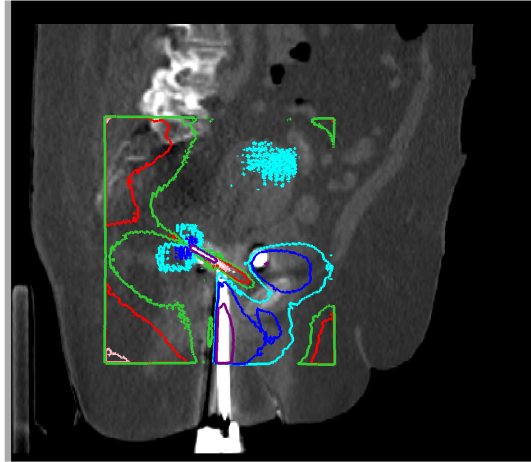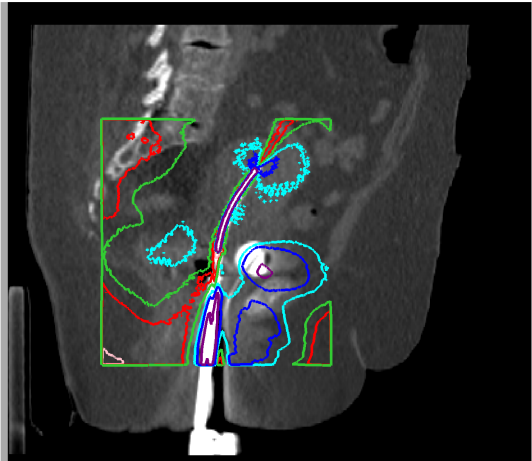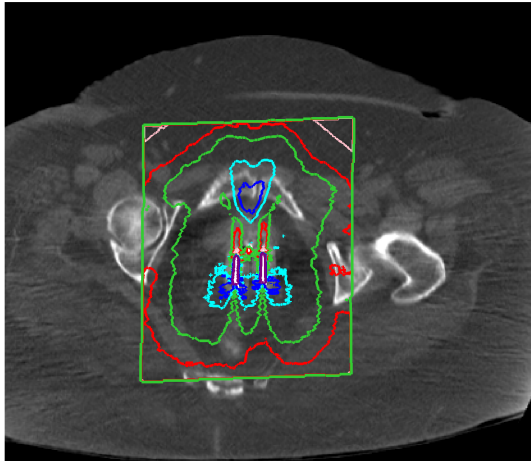

phantom least similar to TG43

D(Y,N,B,B)

D(Y,N,B,N)

D(Y,N,B,M)

D(N,N,N,N)

-->D(Y,N,N,N)<--

D(Y,N,M,M)

D(Y,M,X,X)

D(N,M,X,X)

phantom most similar to TG43

GBBS(solid model applicator, body, balloon and rectal contrast, packing contrast)

Patient\_20 D(Y,N,M,M) %difference from TG43

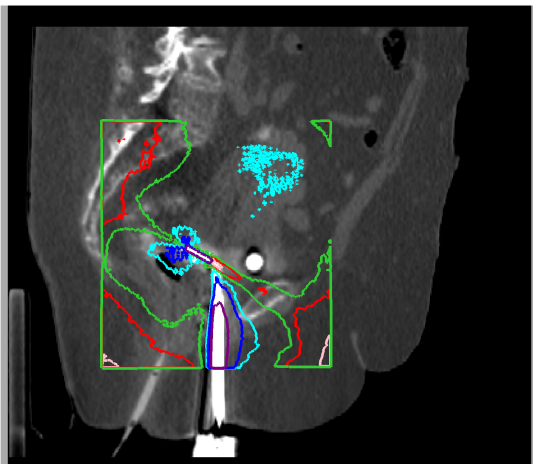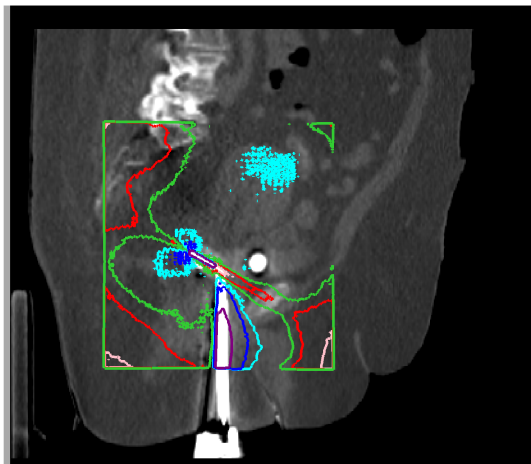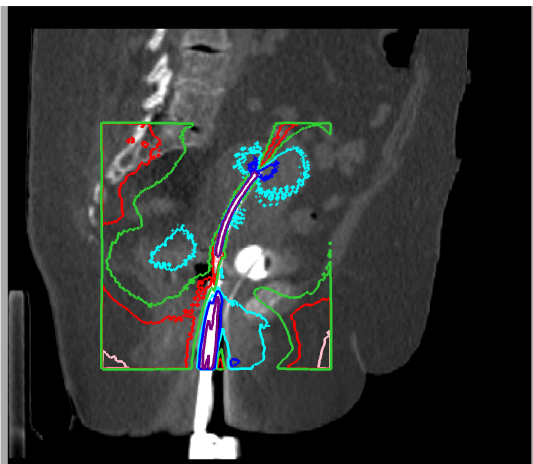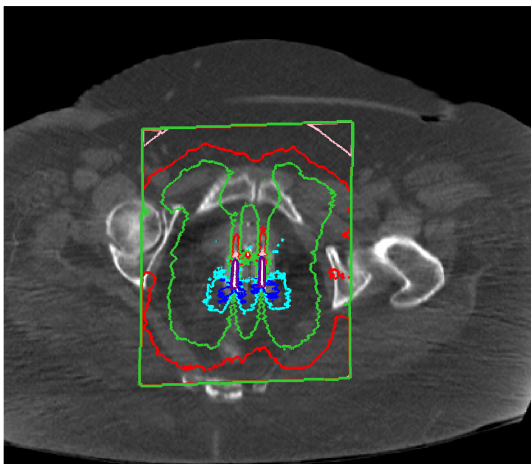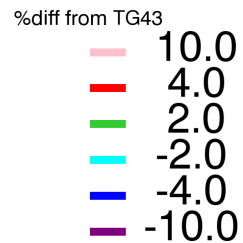

phantom least similar to TG43

D(Y,N,B,B)

D(Y,N,B,N)

D(Y,N,B,M)

D(N,N,N,N)

D(Y,N,N,N)

-->D(Y,N,M,M)<--

D(Y,M,X,X)

D(N,M,X,X)

phantom most similar to TG43

GBBS(solid model applicator, body, balloon and rectal contrast, packing contrast)

Patient\_20 D(Y,M,X,X) %difference from TG43

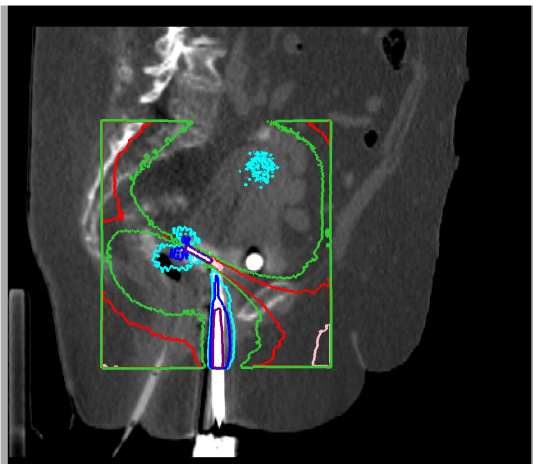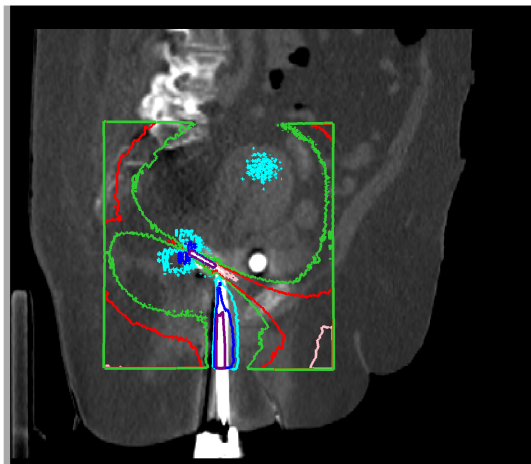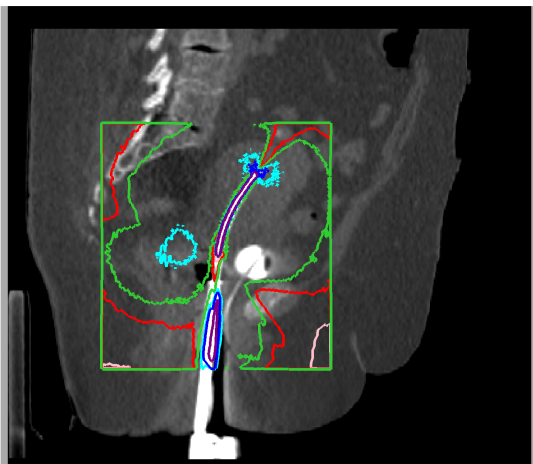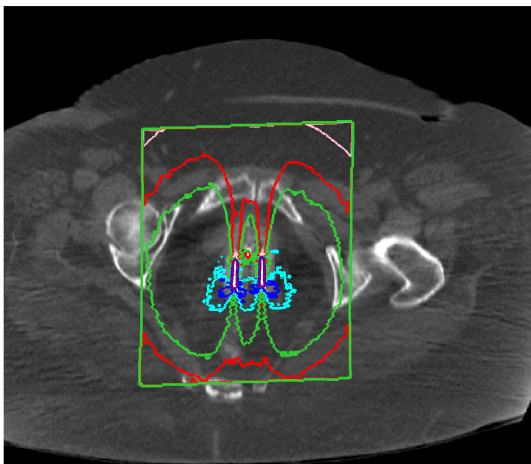

phantom least similar to TG43

D(Y,N,B,B)

D(Y,N,B,N)

D(Y,N,B,M)

D(N,N,N,N)

D(Y,N,N,N)

D(Y,N,M,M)

-->D(Y,M,X,X)<--

D(N,M,X,X)

phantom most similar to TG43

GBBS(solid model applicator, body, balloon and rectal contrast, packing contrast)



Patient\_20 D(N,M,X,X) %difference from TG43

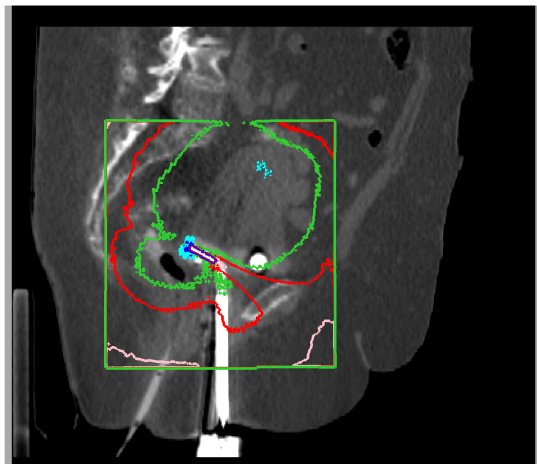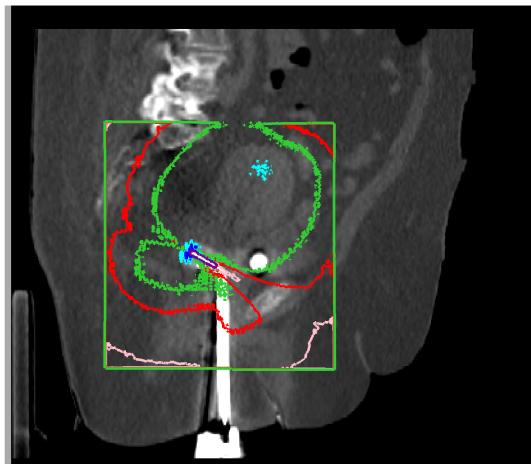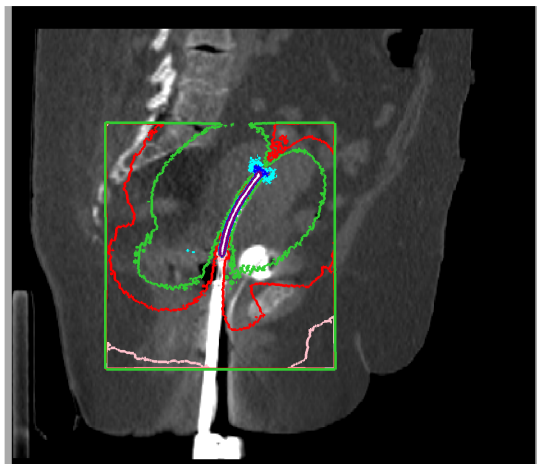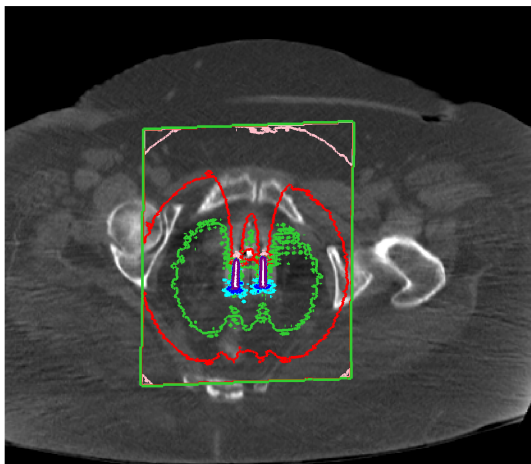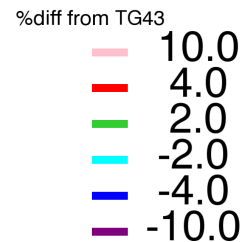

phantom least similar to TG43

D(Y,N,B,B)

D(Y,N,B,N)

D(Y,N,B,M)

D(N,N,N,N)

D(Y,N,N,N)

D(Y,N,M,M)

D(Y,M,X,X)

-->D(N,M,X,X)<--

phantom most similar to TG43

GBBS(solid model applicator, body, balloon and rectal contrast, packing contrast)

Patient\_21 D(Y,N,B,B) %difference from TG43

\*\*entire rectum overridden\*\*

left colpostat sagittal

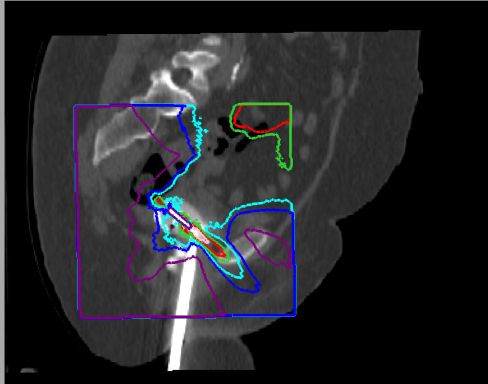

right colpostat sagittal

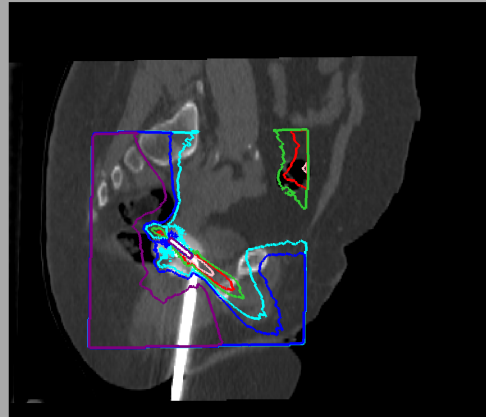

tandem sagittal

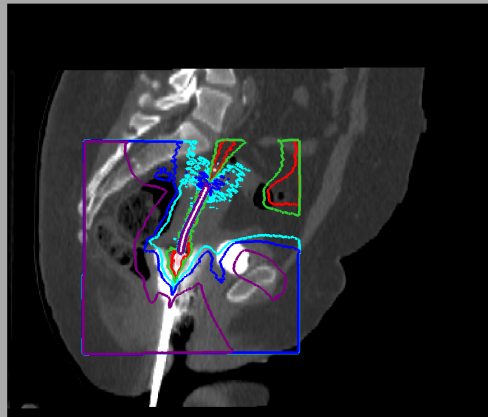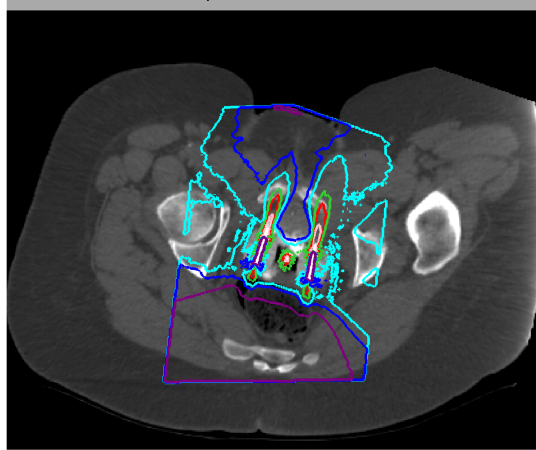

%diff from TG43



phantom least similar to TG43

-->D(Y,N,B,B)<--

D(Y,N,B,N)

D(Y,N,B,M)

D(N,N,N,N)

D(Y,N,N,N)

D(Y,N,M,M)

D(Y,M,X,X)

D(N,M,X,X)

phantom most similar to TG43

GBBS(solid model applicator, body, balloon and rectal contrast, packing contrast)

Patient\_21 D(Y,N,B,N) %difference from TG43

\*\*entire rectum overridden\*\*

left colpostat sagittal

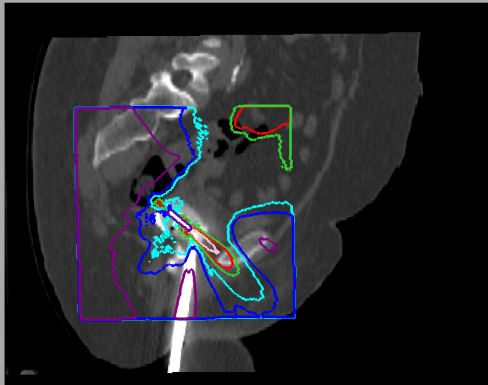

right colpostat sagittal

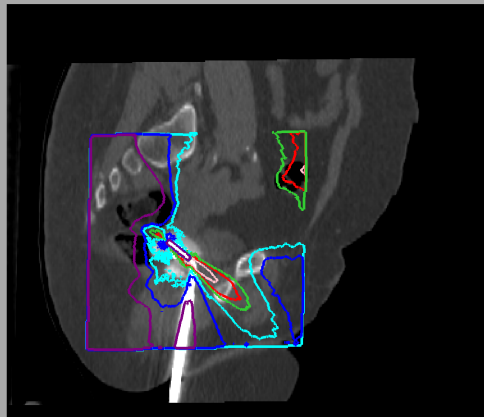

tandem sagittal

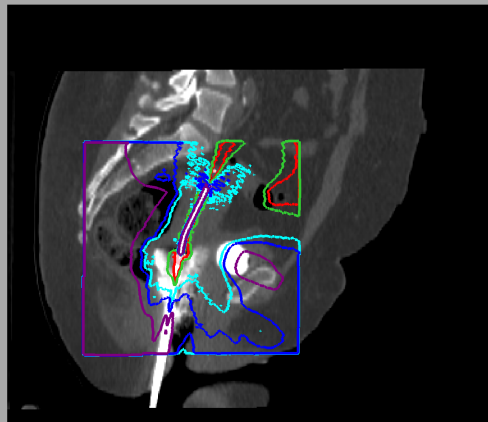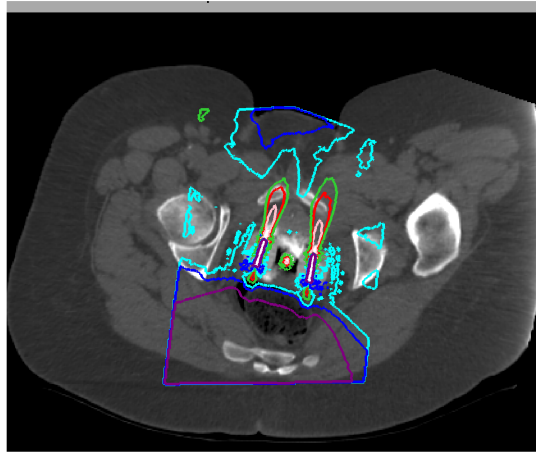

%diff from TG43



phantom least similar to TG43

D(Y,N,B,B)

-->D(Y,N,B,N)<--

D(Y,N,B,M)

D(N,N,N,N)

D(Y,N,N,N)

D(Y,N,M,M)

D(Y,M,X,X)

D(N,M,X,X)

phantom most similar to TG43

GBBS(solid model applicator, body, balloon and rectal contrast, packing contrast)

Patient\_21 D(Y,N,B,M) %difference from TG43

\*\*entire rectum overridden\*\*

left colpostat sagittal

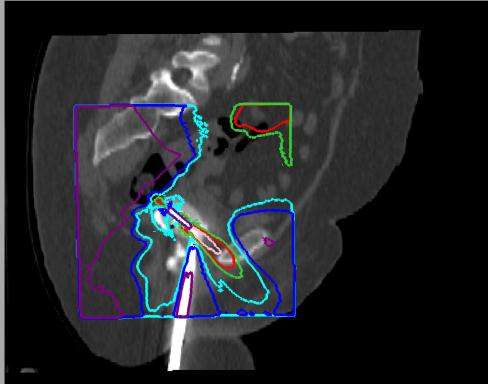

right colpostat sagittal

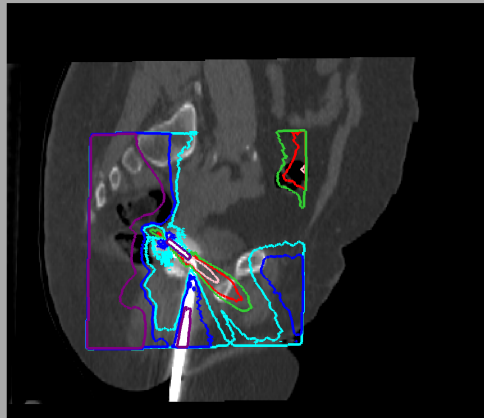

tandem sagittal

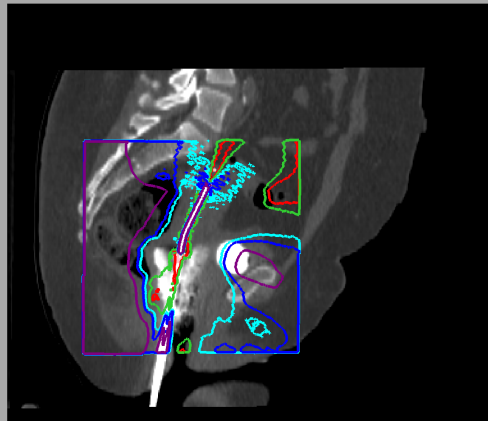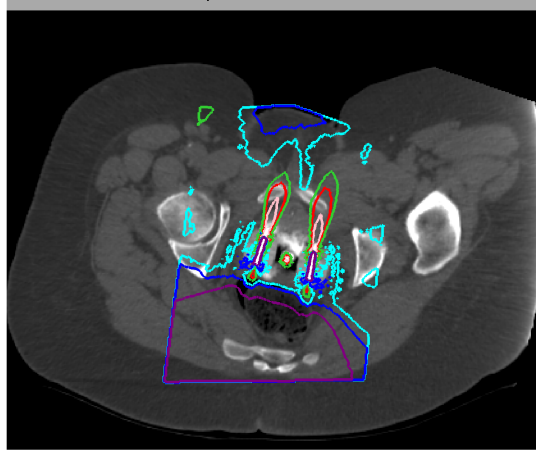

phantom least similar to TG43

D(Y,N,B,B)

D(Y,N,B,N)

-->D(Y,N,B,M)<--

D(N,N,N,N)

D(Y,N,N,N)

D(Y,N,M,M)

D(Y,M,X,X)

D(N,M,X,X)

phantom most similar to TG43

GBBS(solid model applicator, body, balloon and rectal contrast, packing contrast)

Patient\_21 D(N,N,N,N) %difference from TG43

\*\*entire rectum overridden\*\*

left colpostat sagittal

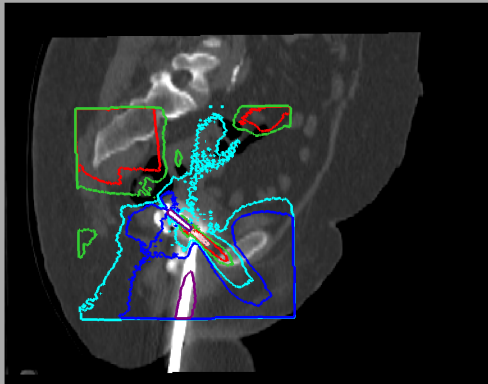

right colpostat sagittal

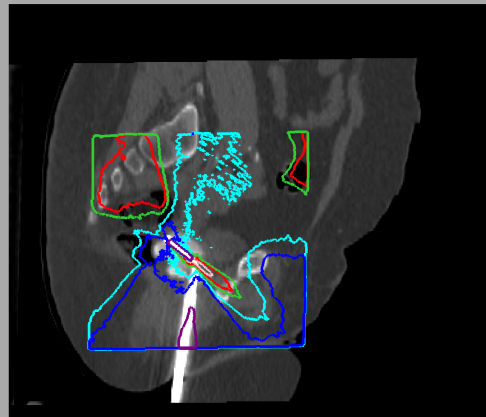

tandem sagittal

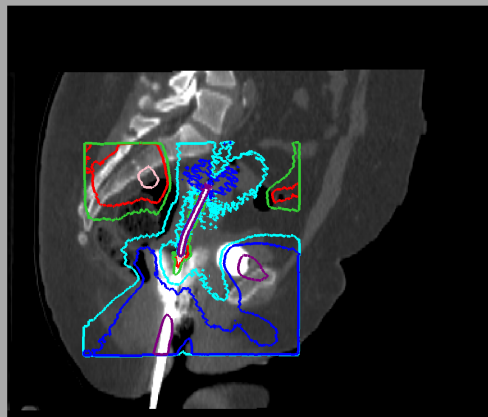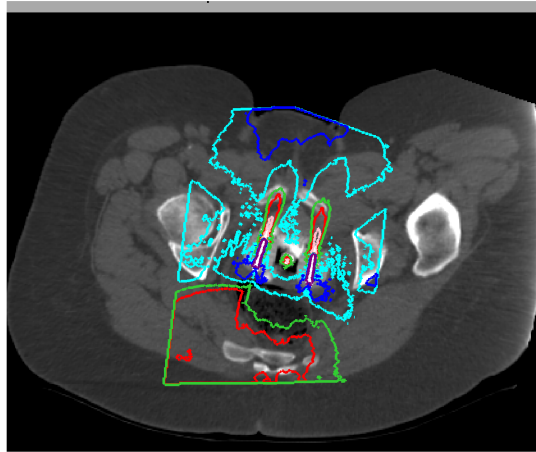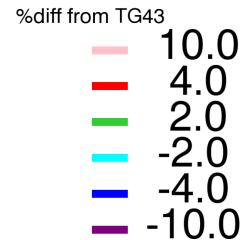

phantom least similar to TG43

D(Y,N,B,B)

D(Y,N,B,N)

D(Y,N,B,M)

-->D(N,N,N,N)<--

D(Y,N,N,N)

D(Y,N,M,M)

D(Y,M,X,X)

D(N,M,X,X)

phantom most similar to TG43

GBBS(solid model applicator, body, balloon and rectal contrast, packing contrast)

Patient\_21 D(Y,N,N,N) %difference from TG43

\*\*entire rectum overridden\*\*

left colpostat sagittal

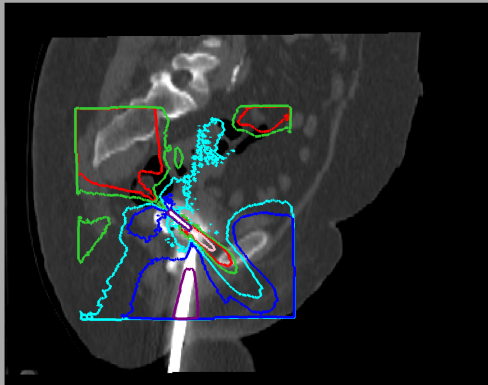

right colpostat sagittal

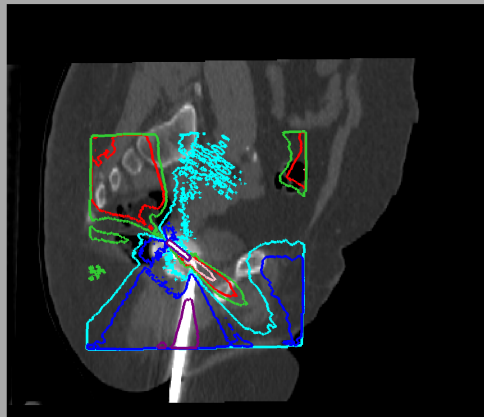

tandem sagittal

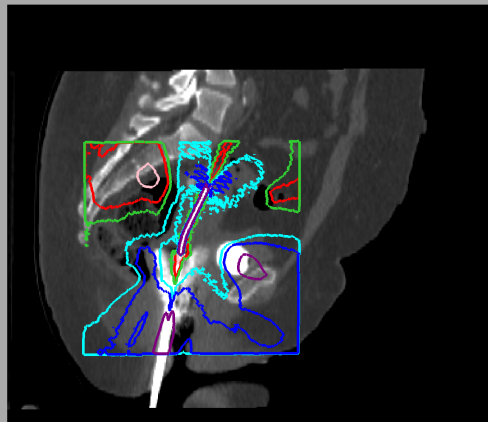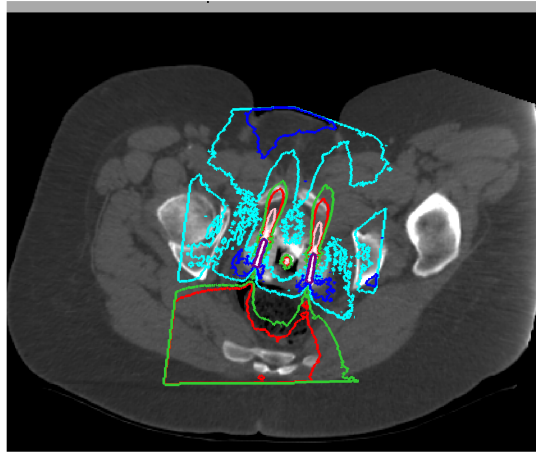

%diff from TG43



phantom least similar to TG43

D(Y,N,B,B)

D(Y,N,B,N)

D(Y,N,B,M)

D(N,N,N,N)

-->D(Y,N,N,N)<--

D(Y,N,M,M)

D(Y,M,X,X)

D(N,M,X,X)

phantom most similar to TG43

GBBS(solid model applicator, body, balloon and rectal contrast, packing contrast)

Patient\_21 D(Y,N,M,M) %difference from TG43

\*\*entire rectum overridden\*\*

left colpostat sagittal

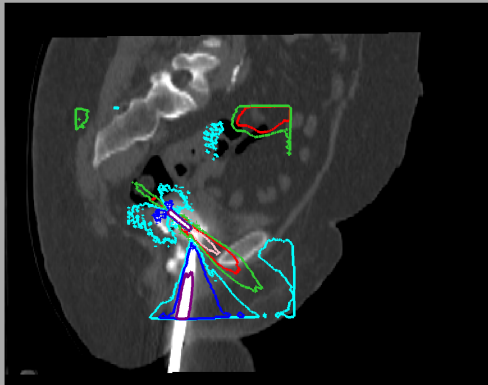

right colpostat sagittal

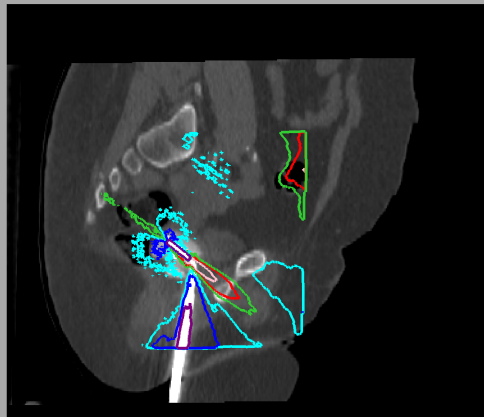

tandem sagittal

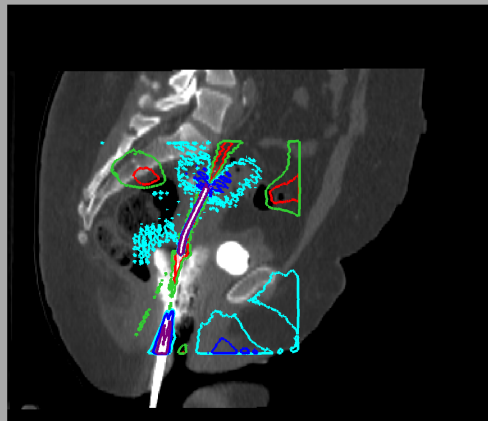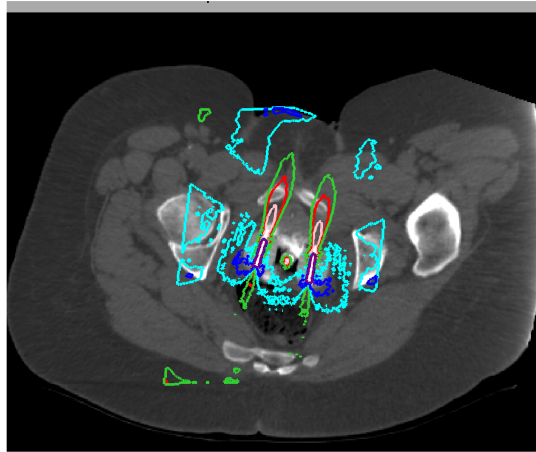

%diff from TG43



phantom least similar to TG43

D(Y,N,B,B)

D(Y,N,B,N)

D(Y,N,B,M)

D(N,N,N,N)

D(Y,N,N,N)

-->D(Y,N,M,M)<--

D(Y,M,X,X)

D(N,M,X,X)

phantom most similar to TG43

GBBS(solid model applicator, body, balloon and rectal contrast, packing contrast)

Patient\_21 D(Y,M,X,X) %difference from TG43

\*\*entire rectum overridden\*\*

left colpostat sagittal

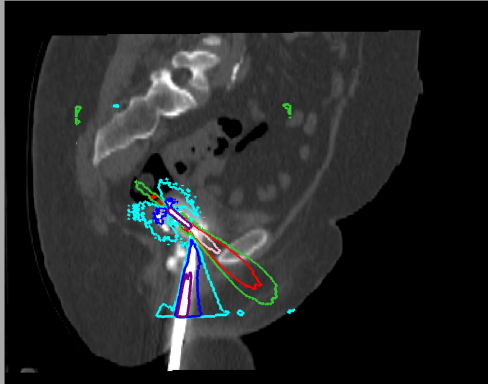

right colpostat sagittal

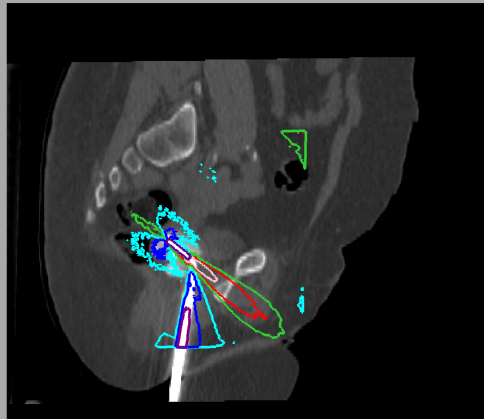

tandem sagittal

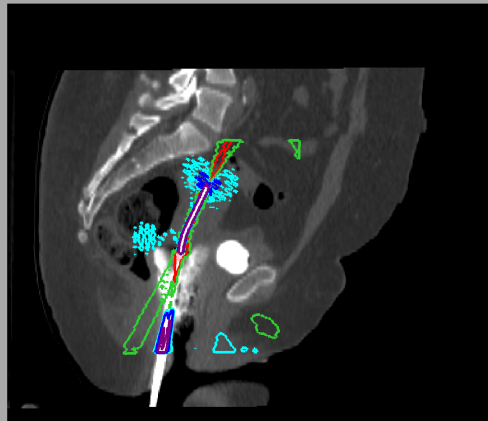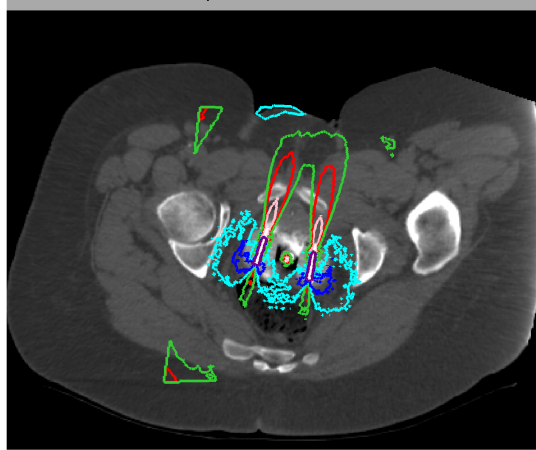

phantom least similar to TG43

D(Y,N,B,B)

D(Y,N,B,N)

D(Y,N,B,M)

D(N,N,N,N)

D(Y,N,N,N)

D(Y,N,M,M)

-->D(Y,M,X,X)<--

D(N,M,X,X)

phantom most similar to TG43

GBBS(solid model applicator, body, balloon and rectal contrast, packing contrast)



Patient\_21 D(N,M,X,X) %difference from TG43

\*\*entire rectum overridden\*\*

left colpostat sagittal

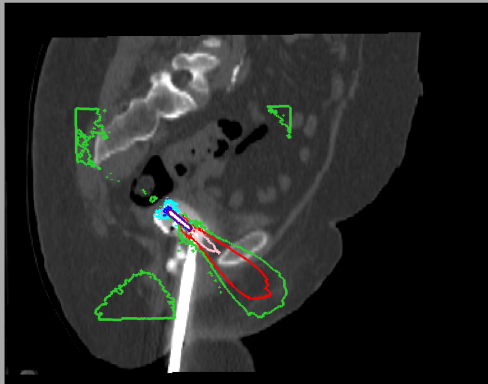

right colpostat sagittal

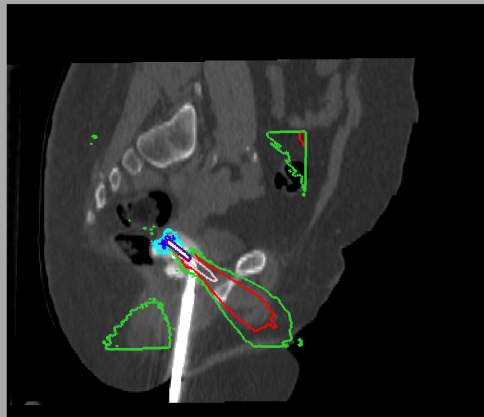

tandem sagittal

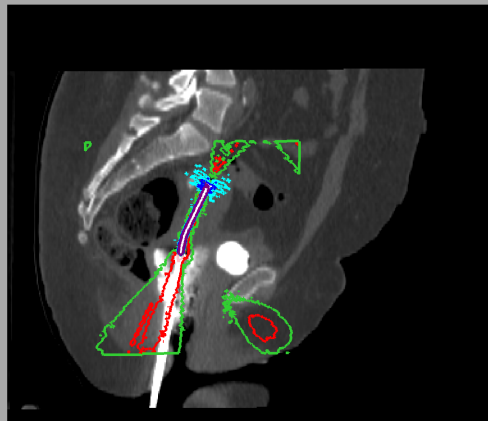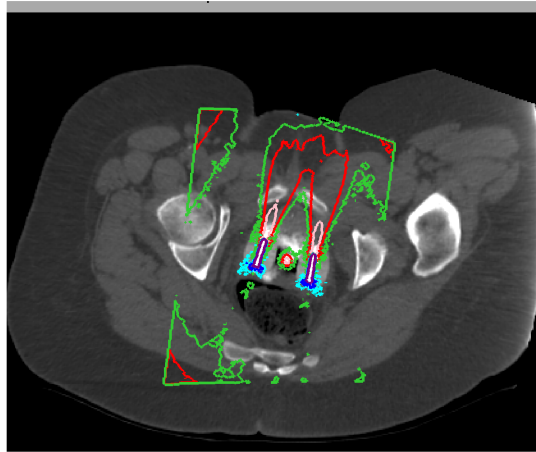

phantom least similar to TG43

D(Y,N,B,B)

D(Y,N,B,N)

D(Y,N,B,M)

D(N,N,N,N)

D(Y,N,N,N)

D(Y,N,M,M)

D(Y,M,X,X)

-->D(N,M,X,X)<--

phantom most similar to TG43

GBBS(solid model applicator, body, balloon and rectal contrast, packing contrast)

Patient\_22 D(Y,N,B,B) %difference from TG43

left colpostats sagittal

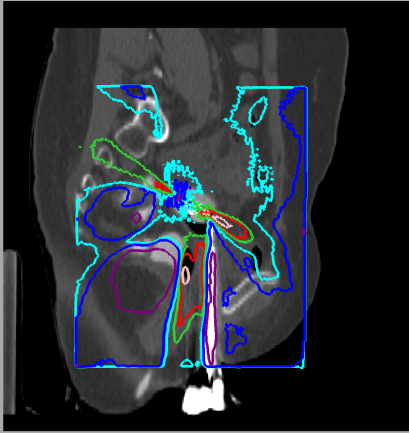

right colpostats sagittal

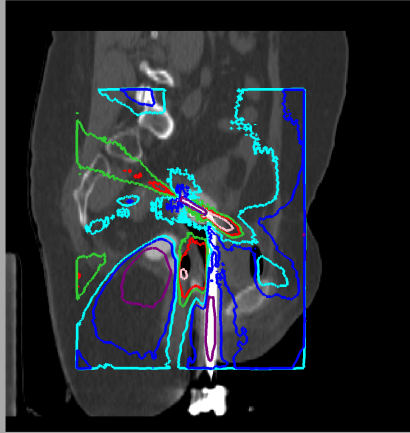

left colpostats transverse

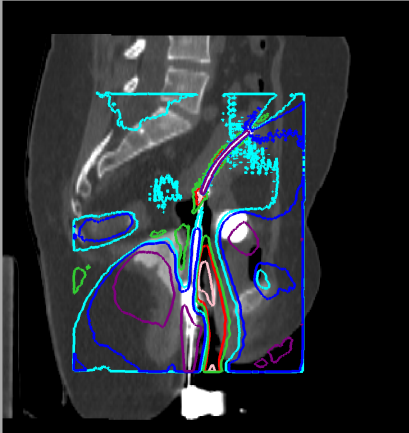

colpostats transverse

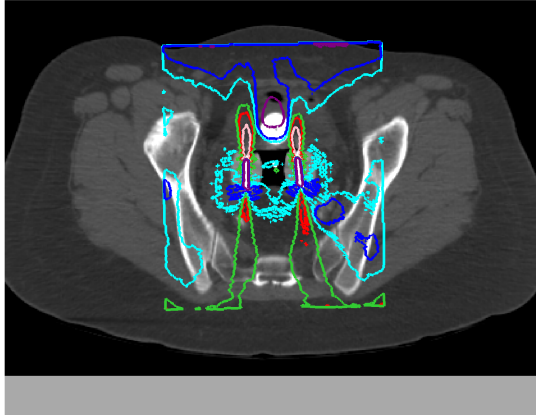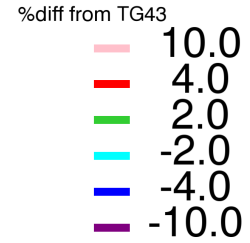

phantom least similar to TG43

-->D(Y,N,B,B)<--

D(Y,N,B,N)

D(Y,N,B,M)

D(N,N,N,N)

D(Y,N,N,N)

D(Y,N,M,M)

D(Y,M,X,X)

D(N,M,X,X)

phantom most similar to TG43

GBBS(solid model applicator, body, balloon and rectal contrast, packing contrast)

Patient\_22 D(Y,N,B,N) %difference from TG43

left colpostats sagittal

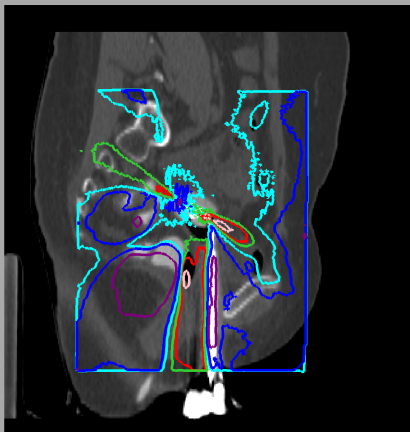

right colpostats sagittal

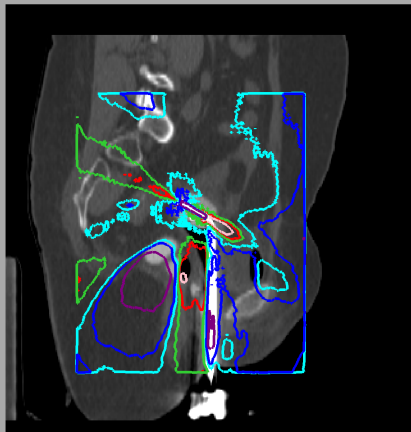

left colpostats transverse

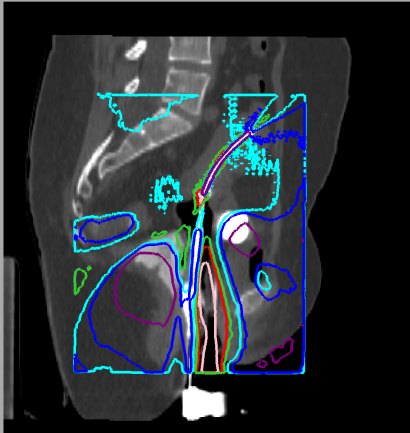

colpostats transverse

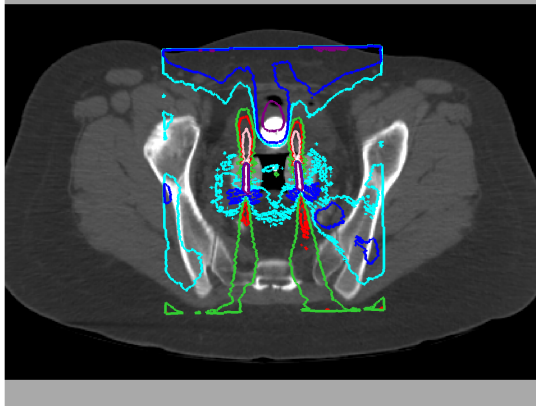

%diff from TG43



phantom least similar to TG43

D(Y,N,B,B)

-->D(Y,N,B,N)<--

D(Y,N,B,M)

D(N,N,N,N)

D(Y,N,N,N)

D(Y,N,M,M)

D(Y,M,X,X)

D(N,M,X,X)

phantom most similar to TG43

GBBS(solid model applicator, body, balloon and rectal contrast, packing contrast)

Patient\_22 D(Y,N,B,M) %difference from TG43

left colpostats sagittal

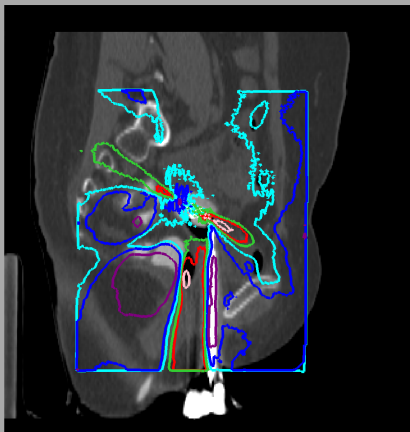

right colpostats sagittal

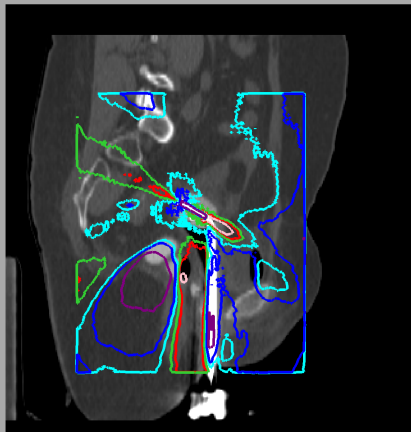

left colpostats transverse

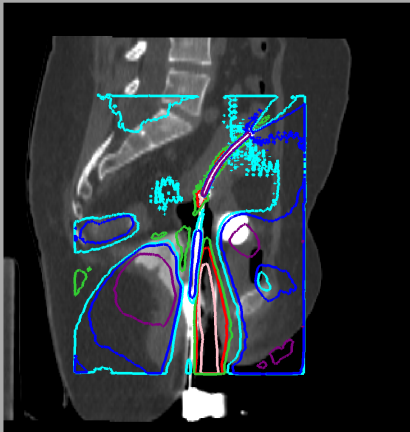

colpostats transverse

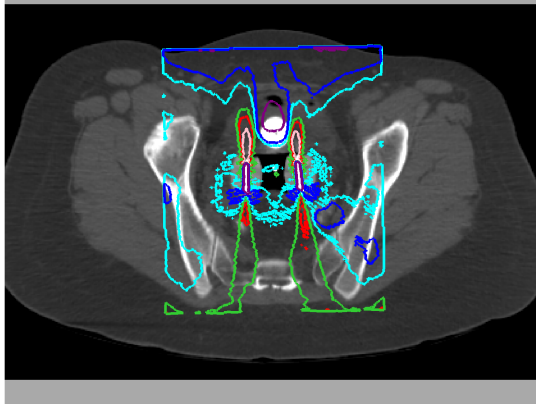

%diff from TG43



phantom least similar to TG43

D(Y,N,B,B)

D(Y,N,B,N)

-->D(Y,N,B,M)<--

D(N,N,N,N)

D(Y,N,N,N)

D(Y,N,M,M)

D(Y,M,X,X)

D(N,M,X,X)

phantom most similar to TG43

GBBS(solid model applicator, body, balloon and rectal contrast, packing contrast)

Patient\_22 D(N,N,N,N) %difference from TG43

left coronal sagittal

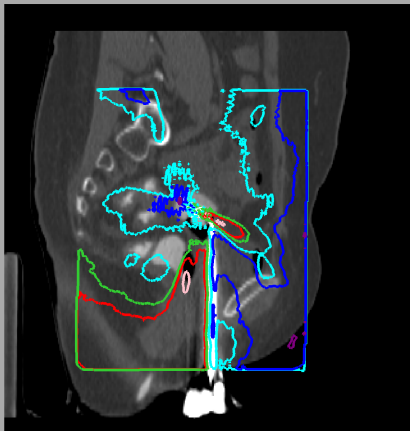

right coronal sagittal

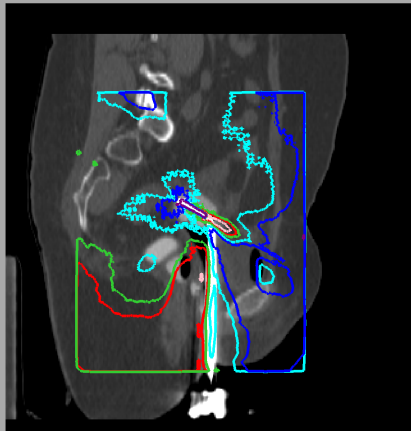

left transverse

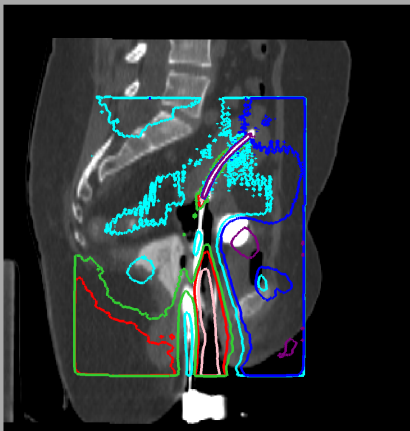

colpostats transverse

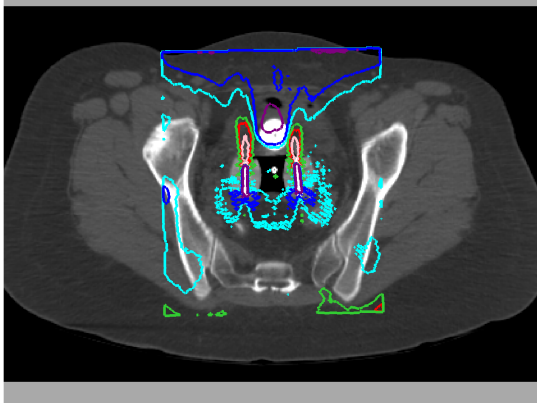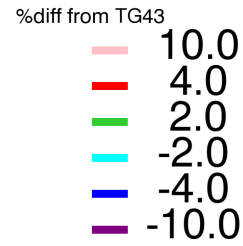

phantom least similar to TG43

D(Y,N,B,B)

D(Y,N,B,N)

D(Y,N,B,M)

-->D(N,N,N,N)<--

D(Y,N,N,N)

D(Y,N,M,M)

D(Y,M,X,X)

D(N,M,X,X)

phantom most similar to TG43

GBBS(solid model applicator, body, balloon and rectal contrast, packing contrast)

Patient\_22 D(Y,N,N,N) %difference from TG43

left colpostats sagittal

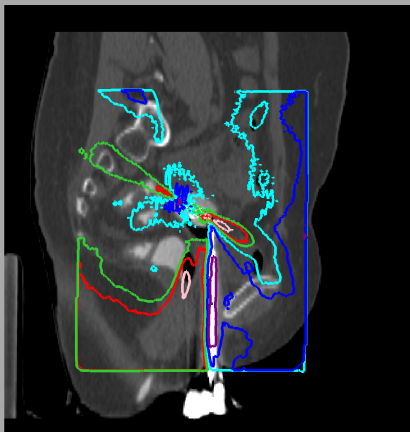

right colpostats sagittal

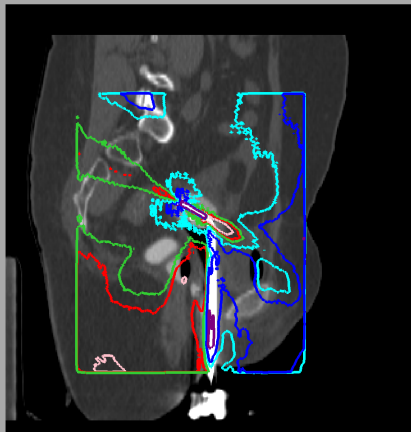

left colpostats transverse

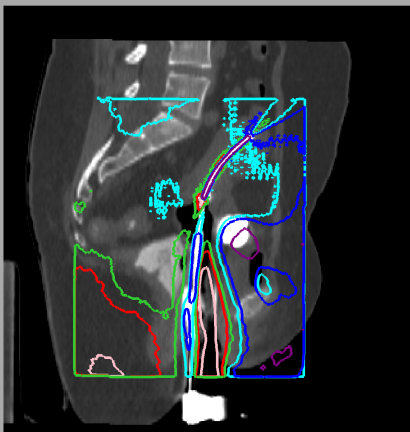

colpostats transverse

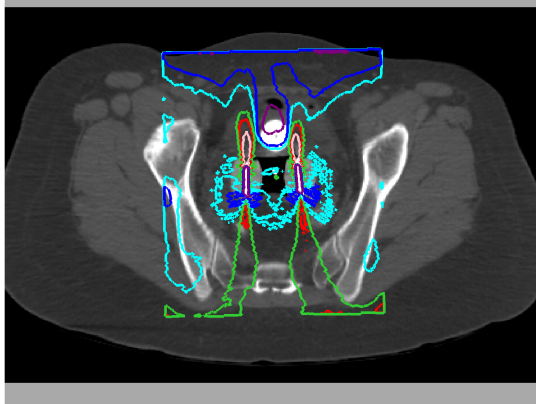

%diff from TG43



phantom least similar to TG43

D(Y,N,B,B)

D(Y,N,B,N)

D(Y,N,B,M)

D(N,N,N,N)

-->D(Y,N,N,N)<--

D(Y,N,M,M)

D(Y,M,X,X)

D(N,M,X,X)

phantom most similar to TG43

GBBS(solid model applicator, body, balloon and rectal contrast, packing contrast)

Patient\_22 D(Y,N,M,M) %difference from TG43

left colpostats sagittal

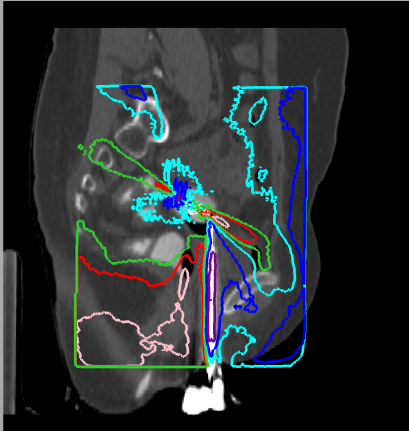

right colpostats sagittal

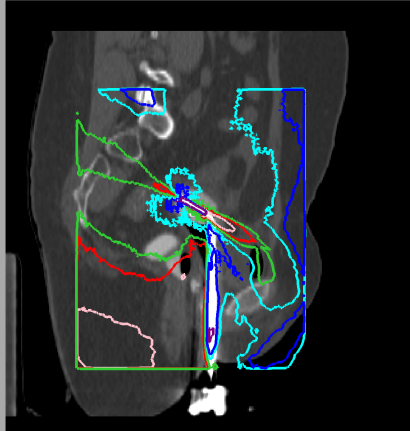

left colpostats transverse

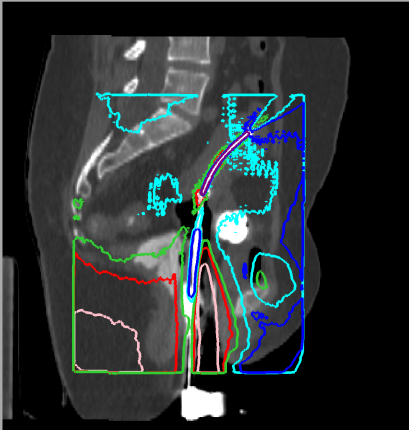

colpostats transverse

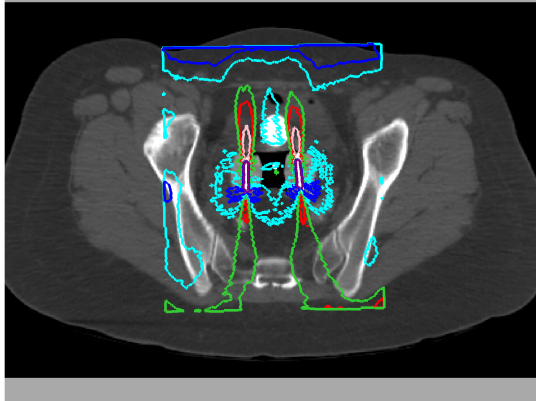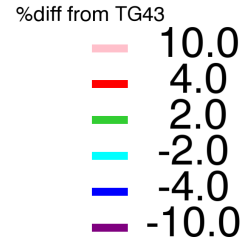

phantom least similar to TG43

D(Y,N,B,B)

D(Y,N,B,N)

D(Y,N,B,M)

D(N,N,N,N)

D(Y,N,N,N)

-->D(Y,N,M,M)<--

D(Y,M,X,X)

D(N,M,X,X)

phantom most similar to TG43

GBBS(solid model applicator, body, balloon and rectal contrast, packing contrast)

Patient\_22 D(Y,M,X,X) %difference from TG43

left colpostats sagittal

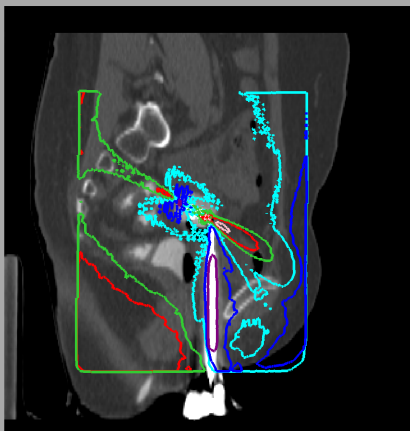

right colpostats sagittal

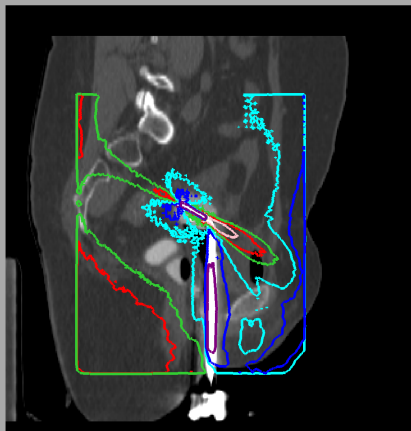

left colpostats transverse

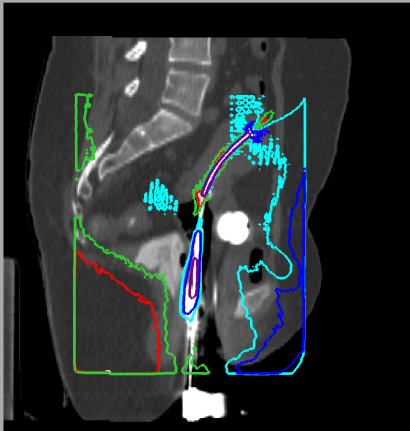

colpostats transverse

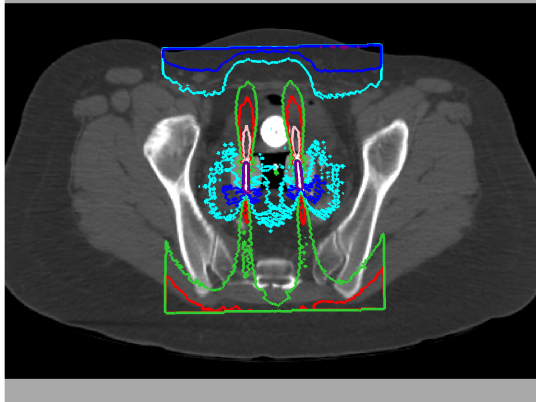

phantom least similar to TG43

D(Y,N,B,B)

D(Y,N,B,N)

D(Y,N,B,M)

D(N,N,N,N)

D(Y,N,N,N)

D(Y,N,M,M)

-->D(Y,M,X,X)<--

D(N,M,X,X)

phantom most similar to TG43

GBBS(solid model applicator, body, balloon and rectal contrast, packing contrast)



Patient\_22 D(N,M,X,X) %difference from TG43

left colpostats sagittal

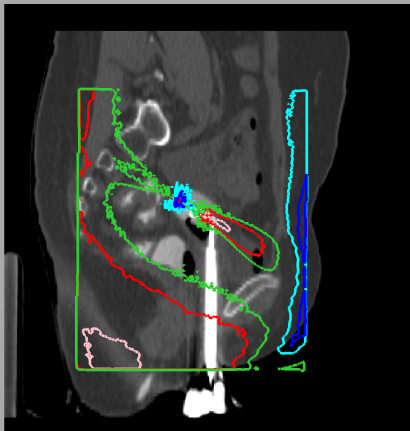

right colpostats sagittal

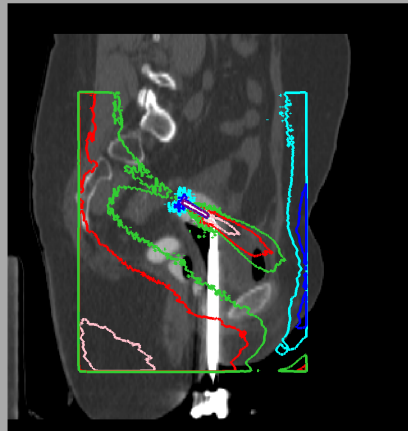

left colpostats transverse

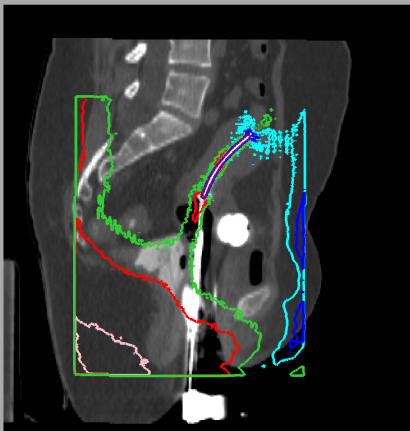

colpostats transverse

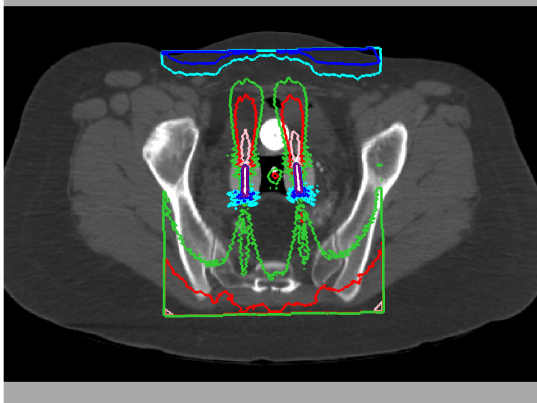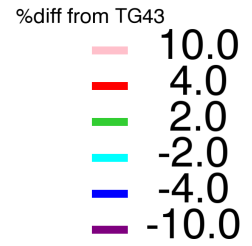

phantom least similar to TG43

- D(Y,N,B,B)
- D(Y,N,B,N)
- D(Y,N,B,M)
- D(N,N,N,N)
- D(Y,N,N,N)
- D(Y,N,M,M)
- D(Y,M,X,X)

-->D(N,M,X,X)<--

phantom most similar to TG43

GBBS(solid model applicator, body, balloon and rectal contrast, packing contrast)

Patient\_23 D(Y,N,B,B) %difference from TG43

left colpostat sagittal

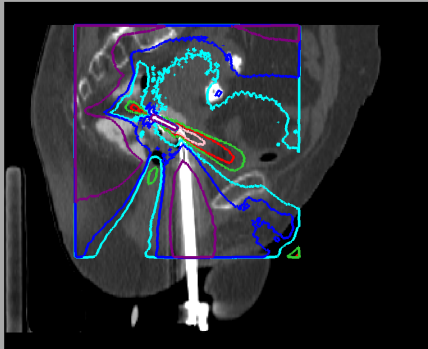

right colpostat sagittal

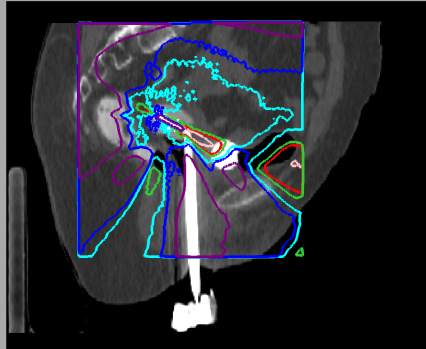

tandem sagittal

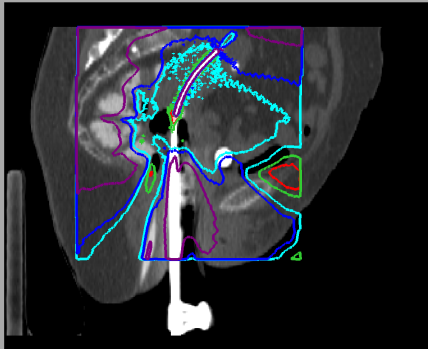

colpostats transverse

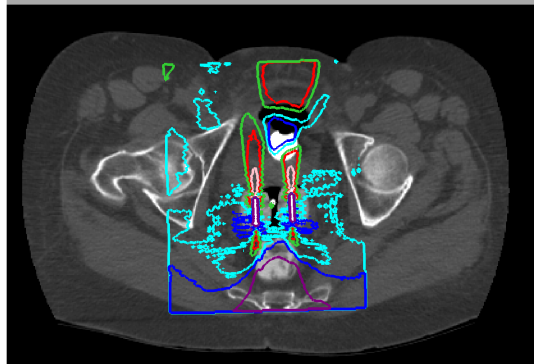

phantom least similar to TG43

-->D(Y,N,B,B)<--

D(Y,N,B,N)

D(Y,N,B,M)

D(N,N,N,N)

D(Y,N,N,N)

D(Y,N,M,M)

D(Y,M,X,X)

D(N,M,X,X)

phantom most similar to TG43

GBBS(solid model applicator, body, balloon and rectal contrast, packing contrast)

Patient\_23 D(Y,N,B,N) %difference from TG43

left colpostat sagittal

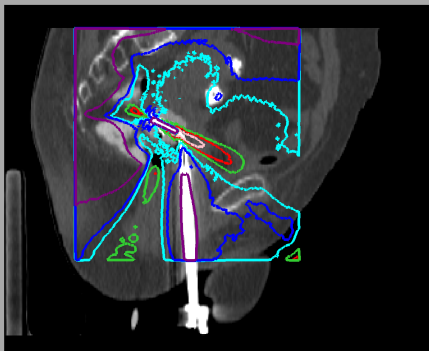

right colpostat sagittal

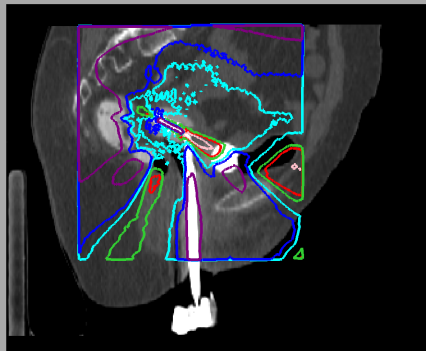

tandem sagittal

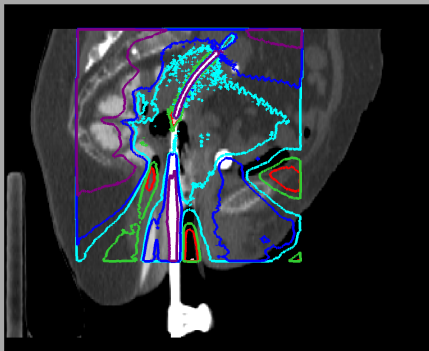

colpostats transverse

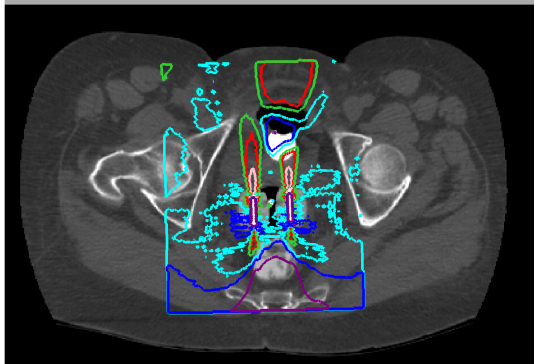

phantom least similar to TG43

D(Y,N,B,B)

-->D(Y,N,B,N)<--

D(Y,N,B,M)

D(N,N,N,N)

D(Y,N,N,N)

D(Y,N,M,M)

D(Y,M,X,X)

D(N,M,X,X)

phantom most similar to TG43

GBBS(solid model applicator, body, balloon and rectal contrast, packing contrast)

Patient\_23 D(Y,N,B,M) %difference from TG43

left colpostat sagittal

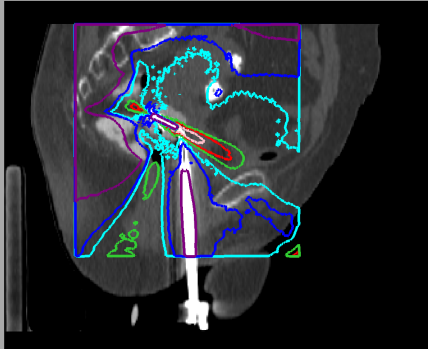

right colpostat sagittal

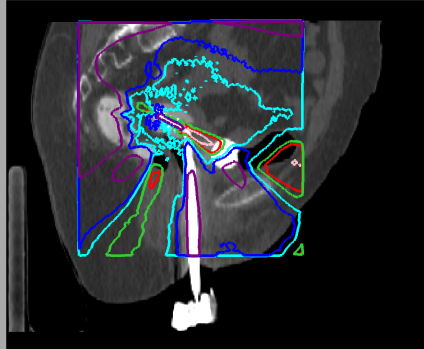

tandem sagittal

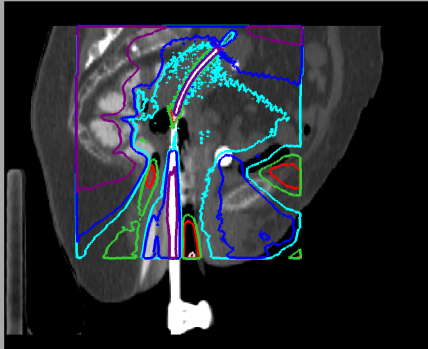

colpostats transverse

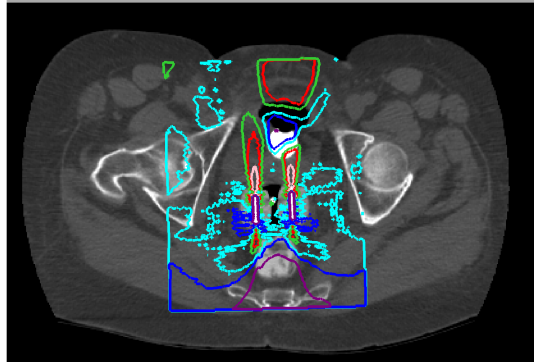

phantom least similar to TG43

D(Y,N,B,B)

D(Y,N,B,N)

-->D(Y,N,B,M)<--

D(N,N,N,N)

D(Y,N,N,N)

D(Y,N,M,M)

D(Y,M,X,X)

D(N,M,X,X)

phantom most similar to TG43

GBBS(solid model applicator, body, balloon and rectal contrast, packing contrast)

Patient\_23 D(N,N,N,N) %difference from TG43

left colpostat sagittal

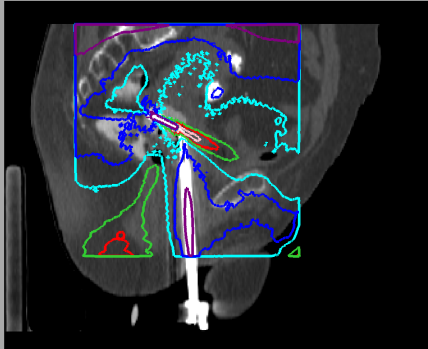

right colpostat sagittal

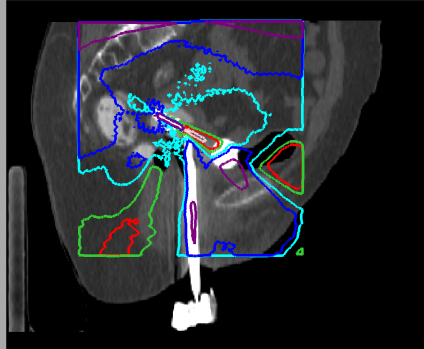

tandem sagittal

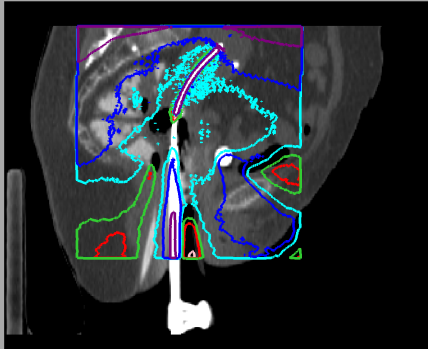

colpostats transverse

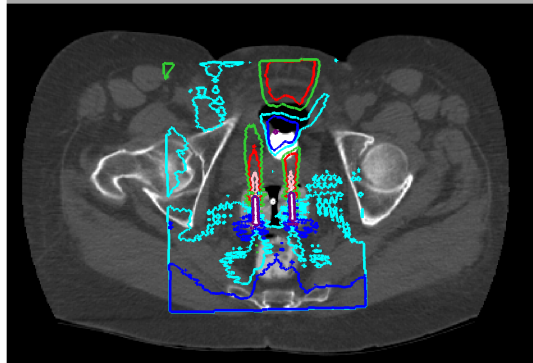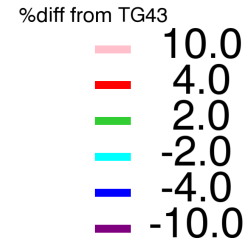

phantom least similar to TG43

D(Y,N,B,B)

D(Y,N,B,N)

D(Y,N,B,M)

-->D(N,N,N,N)<--

D(Y,N,N,N)

D(Y,N,M,M)

D(Y,M,X,X)

D(N,M,X,X)

phantom most similar to TG43

GBBS(solid model applicator, body, balloon and rectal contrast, packing contrast)

Patient\_23 D(Y,N,N,N) %difference from TG43

left colpostat sagittal

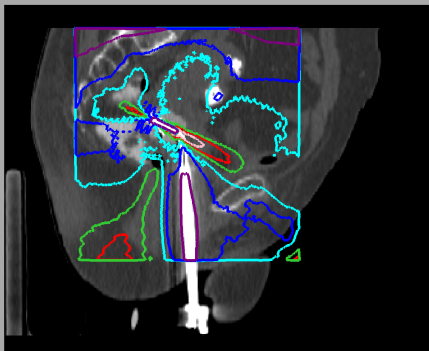

right colpostat sagittal

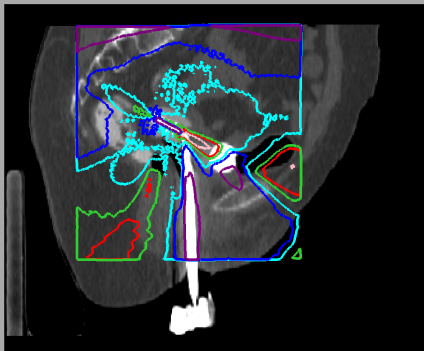

tandem sagittal

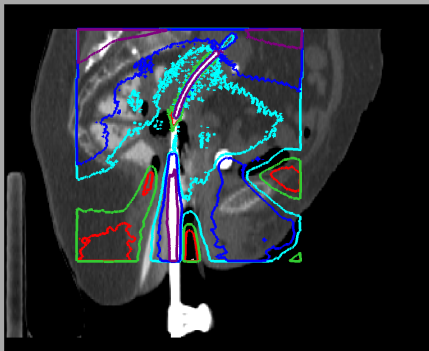

colpostats transverse

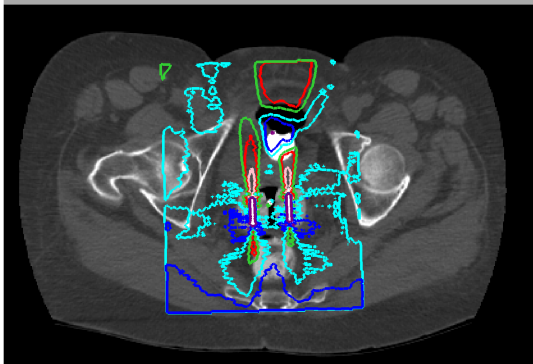

%diff from TG43



phantom least similar to TG43

D(Y,N,B,B)

D(Y,N,B,N)

D(Y,N,B,M)

D(N,N,N,N)

-->D(Y,N,N,N)<--

D(Y,N,M,M)

D(Y,M,X,X)

D(N,M,X,X)

phantom most similar to TG43

GBBS(solid model applicator, body, balloon and rectal contrast, packing contrast)

Patient\_23 D(Y,N,M,M) %difference from TG43

left colpostat sagittal

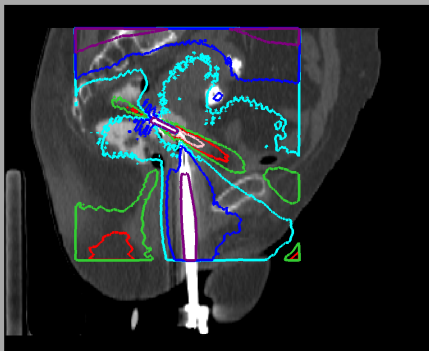

right colpostat sagittal

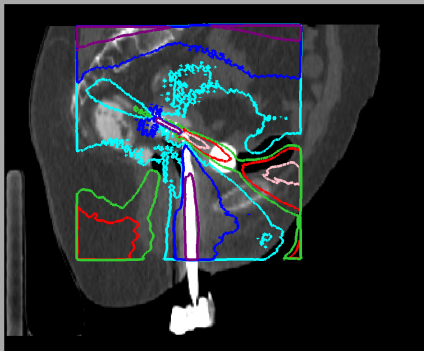

tandem sagittal

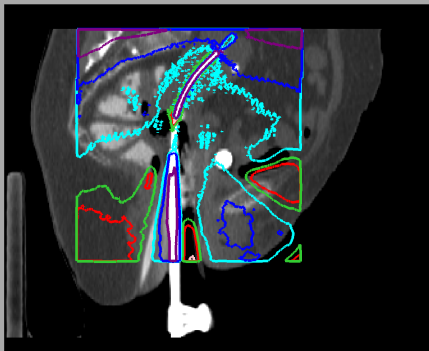

colpostats transverse

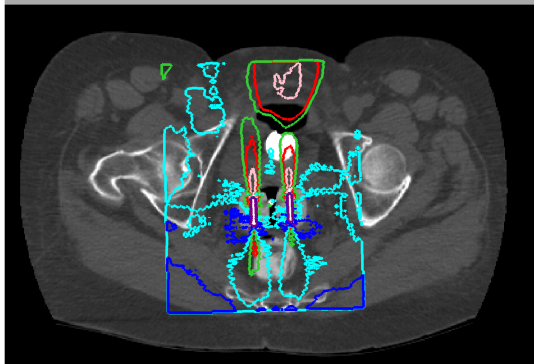

%diff from TG43



phantom least similar to TG43

D(Y,N,B,B)

D(Y,N,B,N)

D(Y,N,B,M)

D(N,N,N,N)

D(Y,N,N,N)

-->D(Y,N,M,M)<--

D(Y,M,X,X)

D(N,M,X,X)

phantom most similar to TG43

GBBS(solid model applicator, body, balloon and rectal contrast, packing contrast)

Patient\_23 D(Y,M,X,X) %difference from TG43

left colpostat sagittal

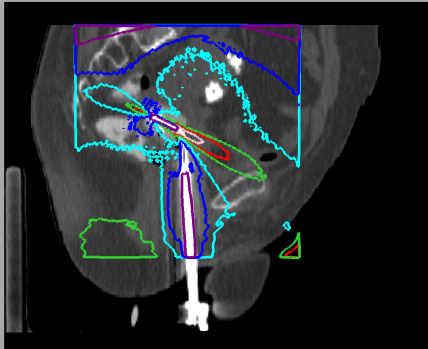

right colpostat sagittal

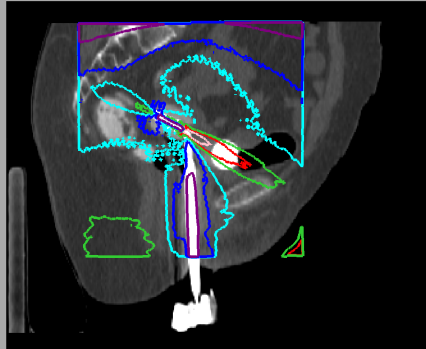

tandem sagittal

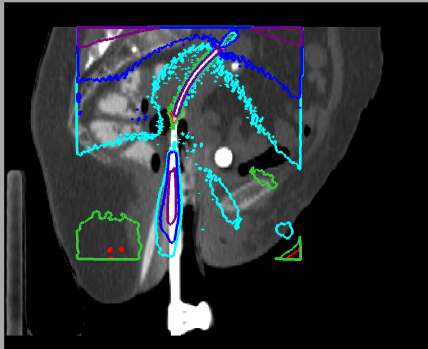

colpostats transverse

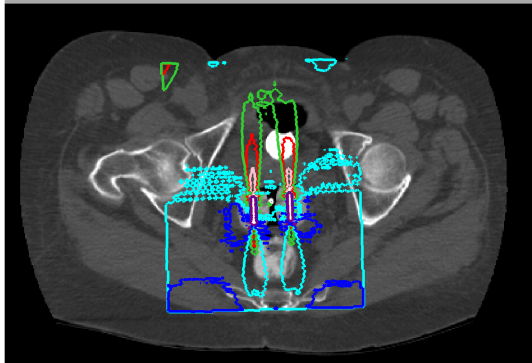

phantom least similar to TG43

D(Y,N,B,B)

D(Y,N,B,N)

D(Y,N,B,M)

D(N,N,N,N)

D(Y,N,N,N)

D(Y,N,M,M)

-->D(Y,M,X,X)<--

D(N,M,X,X)

phantom most similar to TG43

GBBS(solid model applicator, body, balloon and rectal contrast, packing contrast)



Patient\_23 D(N,M,X,X) %difference from TG43

left colpostat sagittal

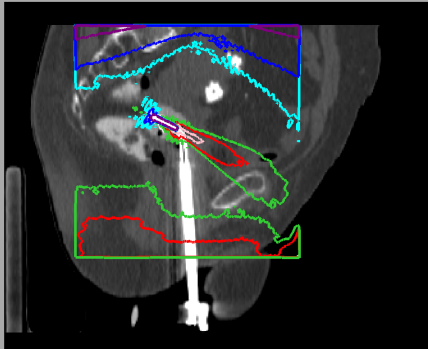

right colpostat sagittal

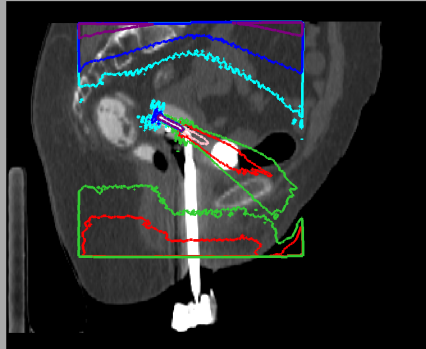

tandem sagittal

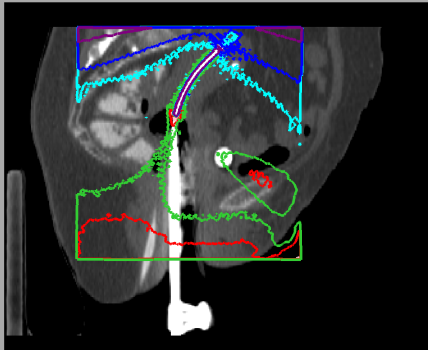

colpostats transverse

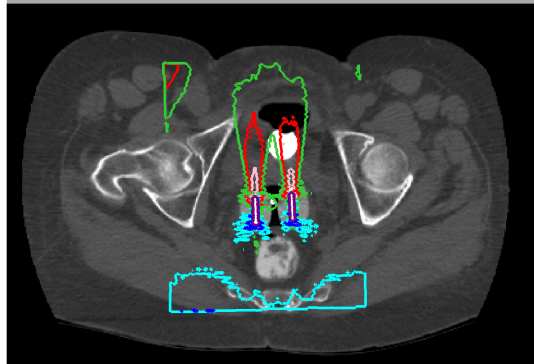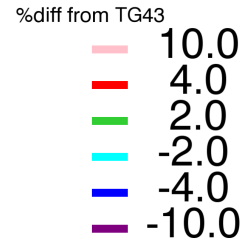

phantom least similar to TG43

D(Y,N,B,B)

D(Y,N,B,N)

D(Y,N,B,M)

D(N,N,N,N)

D(Y,N,N,N)

D(Y,N,M,M)

D(Y,M,X,X)

-->D(N,M,X,X)<--

phantom most similar to TG43

GBBS(solid model applicator, body, balloon and rectal contrast, packing contrast)

Patient\_24 D(Y,N,B,B) %difference from TG43

left colpostat sagittal

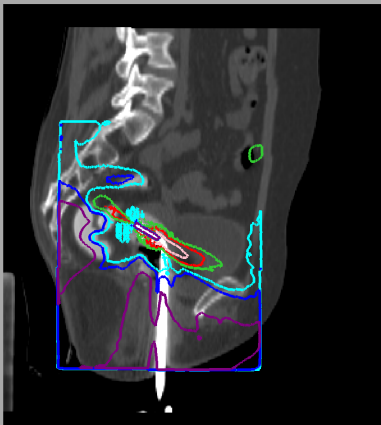

right colpostat sagittal

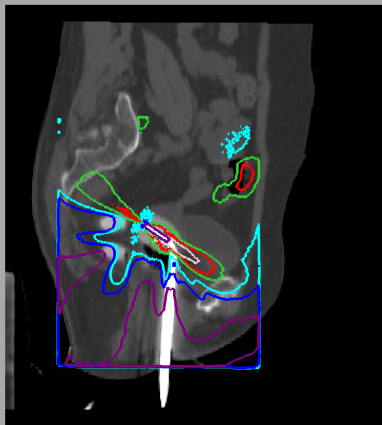

tandem sagittal

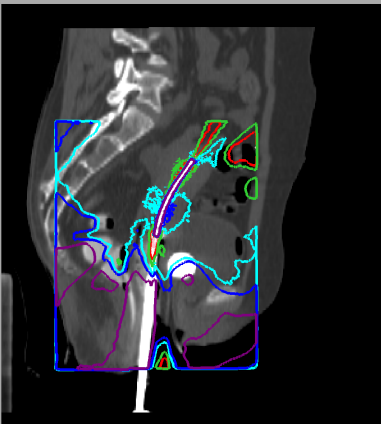

colpostats transverse

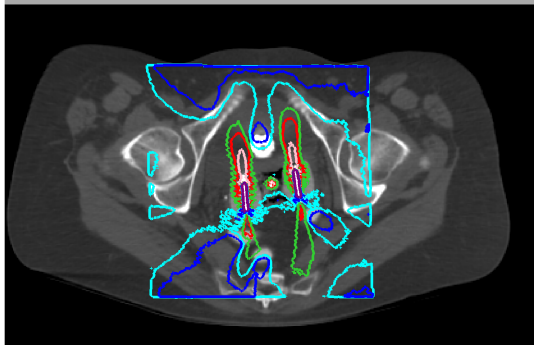

%diff from TG43



phantom least similar to TG43

-->D(Y,N,B,B)<--

D(Y,N,B,N)

D(Y,N,B,M)

D(N,N,N,N)

D(Y,N,N,N)

D(Y,N,M,M)

D(Y,M,X,X)

D(N,M,X,X)

phantom most similar to TG43

GBBS(solid model applicator, body, balloon and rectal contrast, packing contrast)

Patient\_24 D(Y,N,B,N) %difference from TG43

left colpostat sagittal

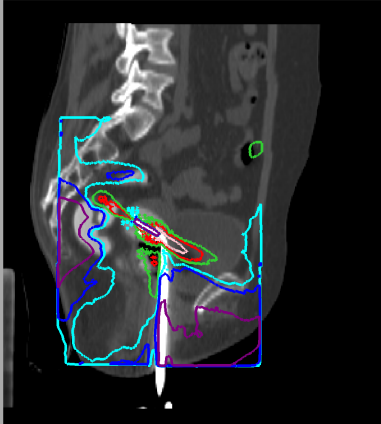

right colpostat sagittal

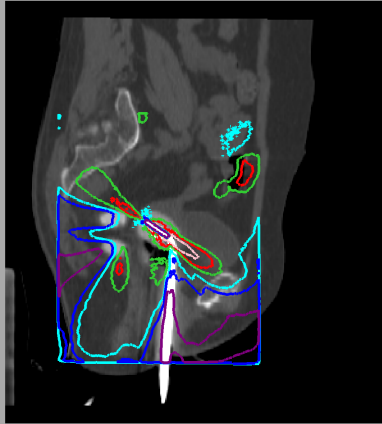

tandem sagittal

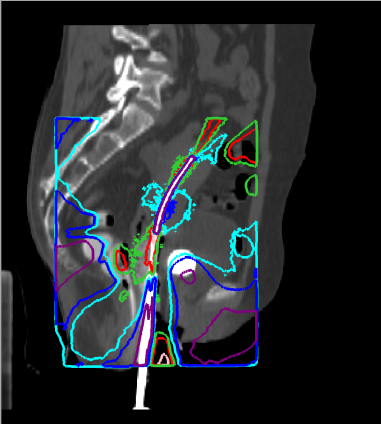

colpostats transverse

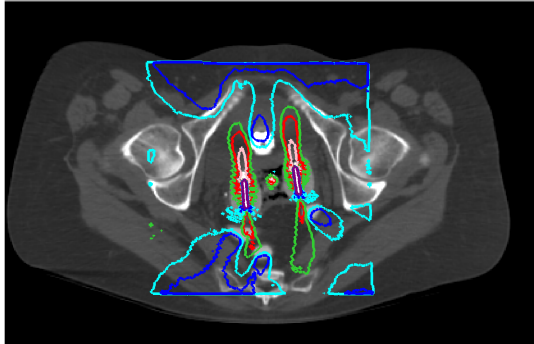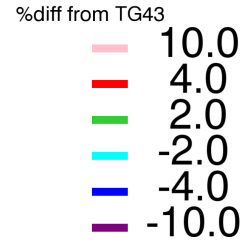

phantom least similar to TG43

D(Y,N,B,B)

-->D(Y,N,B,N)<--

D(Y,N,B,M)

D(N,N,N,N)

D(Y,N,N,N)

D(Y,N,M,M)

D(Y,M,X,X)

D(N,M,X,X)

phantom most similar to TG43

GBBS(solid model applicator, body, balloon and rectal contrast, packing contrast)

Patient\_24 D(Y,N,B,M) %difference from TG43

left colpostat sagittal

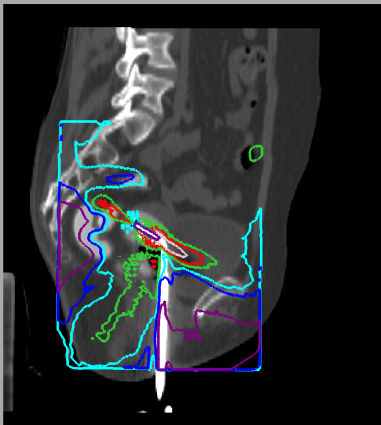

right colpostat sagittal

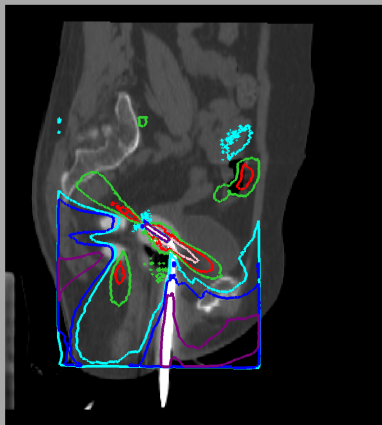

tandem sagittal

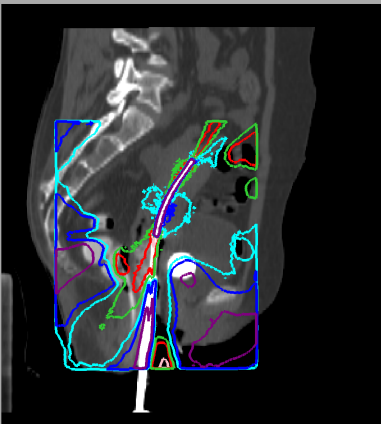

colpostats transverse

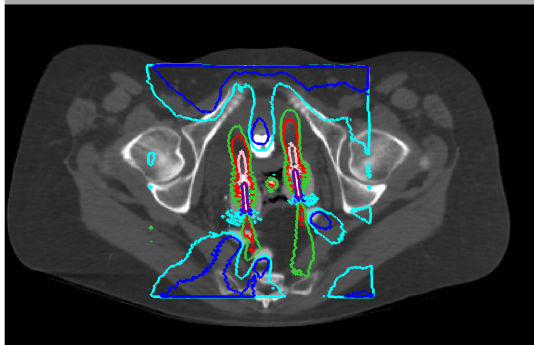

%diff from TG43



phantom least similar to TG43

D(Y,N,B,B)

D(Y,N,B,N)

-->D(Y,N,B,M)<--

D(N,N,N,N)

D(Y,N,N,N)

D(Y,N,M,M)

D(Y,M,X,X)

D(N,M,X,X)

phantom most similar to TG43

GBBS(solid model applicator, body, balloon and rectal contrast, packing contrast)

Patient\_24 D(N,N,N,N) %difference from TG43

left colpostat sagittal

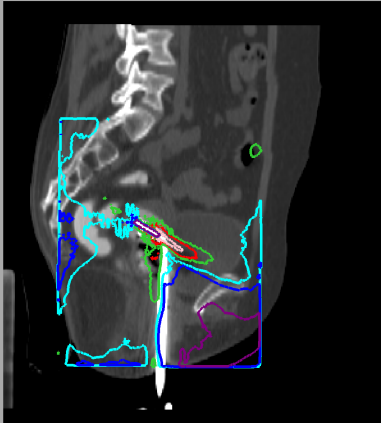

right colpostat sagittal

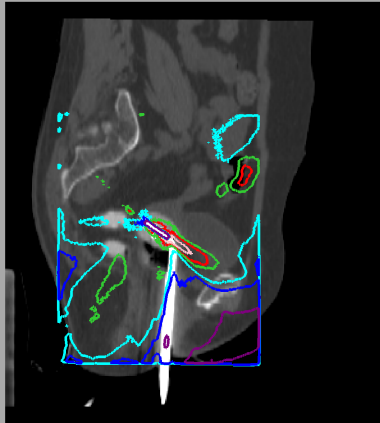

tandem sagittal

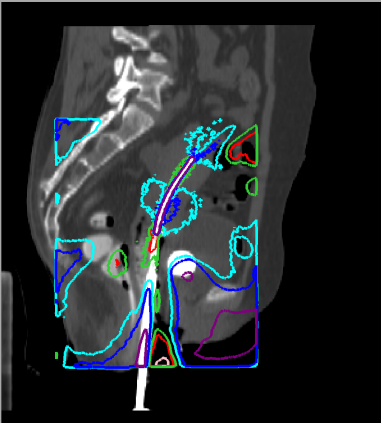

colpostats transverse

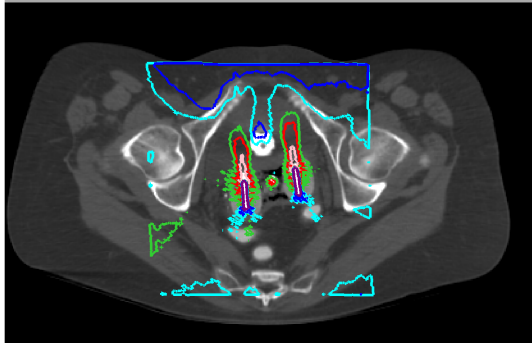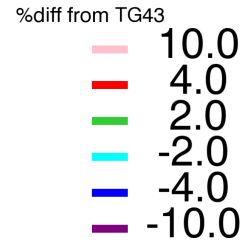

phantom least similar to TG43

D(Y,N,B,B)

D(Y,N,B,N)

D(Y,N,B,M)

-->D(N,N,N,N)<--

D(Y,N,N,N)

D(Y,N,M,M)

D(Y,M,X,X)

D(N,M,X,X)

phantom most similar to TG43

GBBS(solid model applicator, body, balloon and rectal contrast, packing contrast)

Patient\_24 D(Y,N,N,N) %difference from TG43

left colpostat sagittal

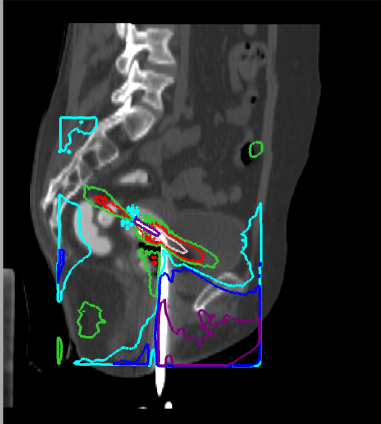

right colpostat sagittal

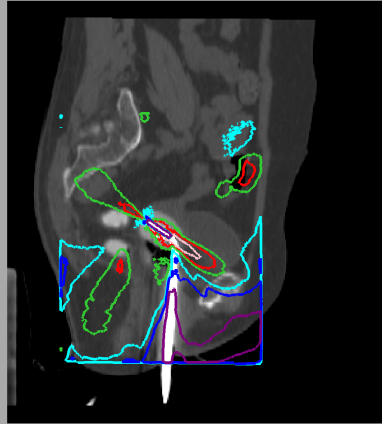

tandem sagittal

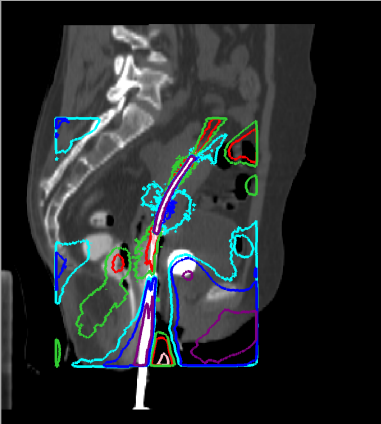

colpostats transverse

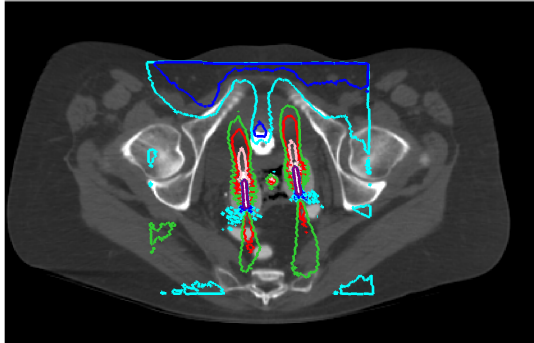

phantom least similar to TG43

D(Y,N,B,B)

D(Y,N,B,N)

D(Y,N,B,M)

D(N,N,N,N)

-->D(Y,N,N,N)<--

D(Y,N,M,M)

D(Y,M,X,X)

D(N,M,X,X)

phantom most similar to TG43

GBBS(solid model applicator, body, balloon and rectal contrast, packing contrast)

Patient\_24 D(Y,N,M,M) %difference from TG43

left colpostat sagittal

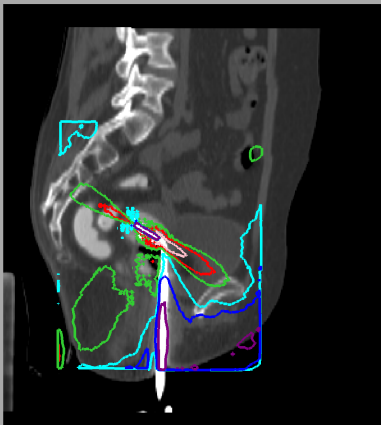

right colpostat sagittal

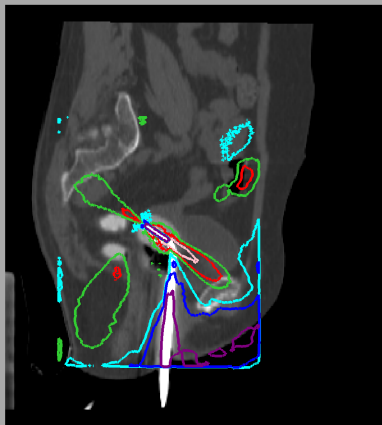

tandem sagittal

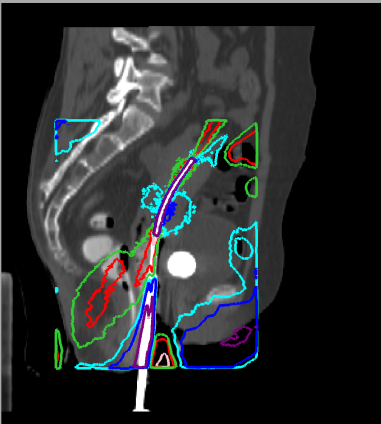

colpostats transverse

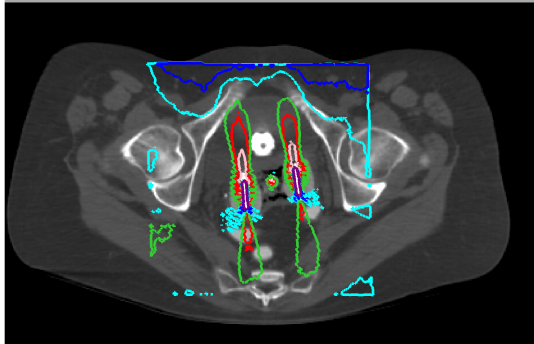

%diff from TG43



phantom least similar to TG43

D(Y,N,B,B)

D(Y,N,B,N)

D(Y,N,B,M)

D(N,N,N,N)

D(Y,N,N,N)

-->D(Y,N,M,M)<--

D(Y,M,X,X)

D(N,M,X,X)

phantom most similar to TG43

GBBS(solid model applicator, body, balloon and rectal contrast, packing contrast)

Patient\_24 D(Y,M,X,X) %difference from TG43

left colpostat sagittal

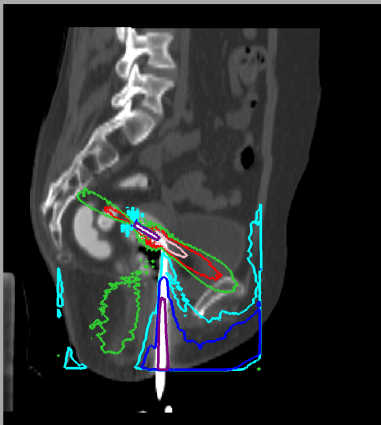

right colpostat sagittal

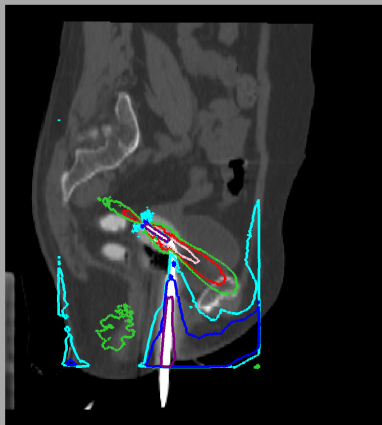

tandem sagittal

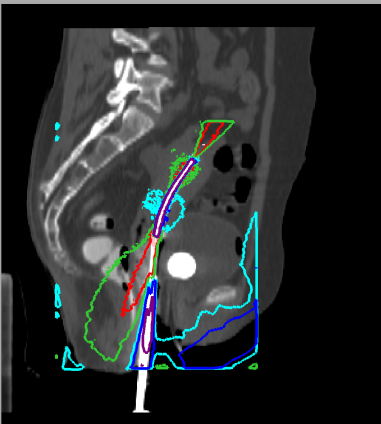

colpostats transverse

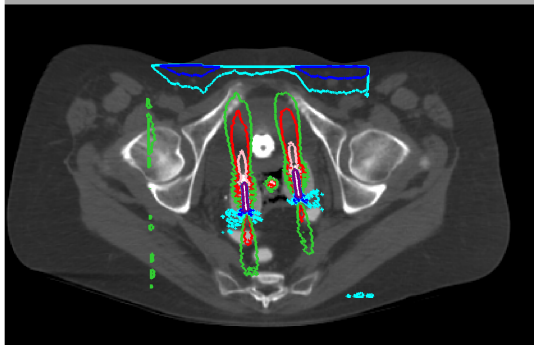

%diff from TG43



phantom least similar to TG43

D(Y,N,B,B)

D(Y,N,B,N)

D(Y,N,B,M)

D(N,N,N,N)

D(Y,N,N,N)

D(Y,N,M,M)

-->D(Y,M,X,X)<--

D(N,M,X,X)

phantom most similar to TG43

GBBS(solid model applicator, body, balloon and rectal contrast, packing contrast)



Patient\_24 D(N,M,X,X) %difference from TG43

left colpostat sagittal

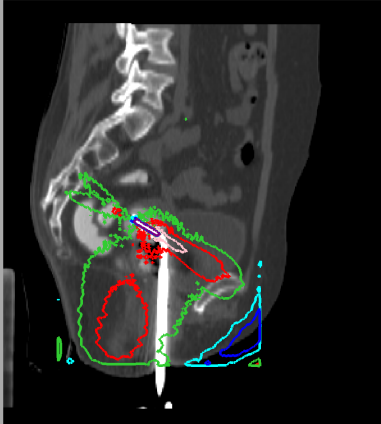

right colpostat sagittal

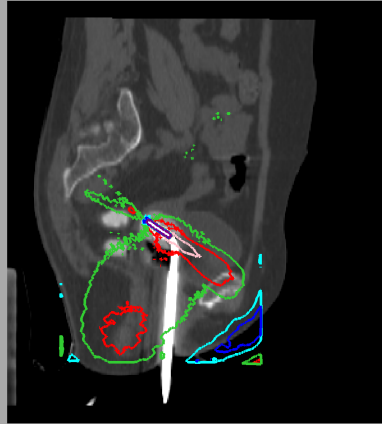

tandem sagittal

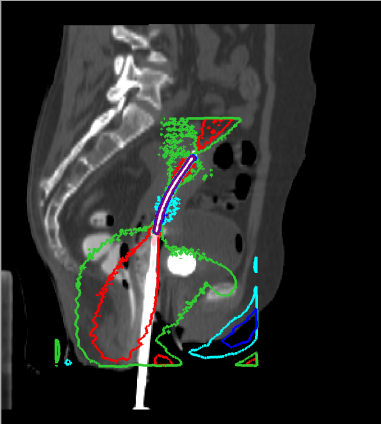

colpostats transverse

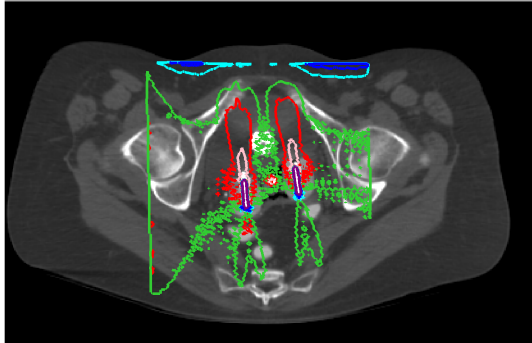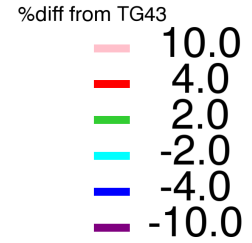

phantom least similar to TG43

D(Y,N,B,B)

D(Y,N,B,N)

D(Y,N,B,M)

D(N,N,N,N)

D(Y,N,N,N)

D(Y,N,M,M)

D(Y,M,X,X)

-->D(N,M,X,X)<--

phantom most similar to TG43

GBBS(solid model applicator, body, balloon and rectal contrast, packing contrast)

Patient\_25 D(Y,N,B,B) %difference from TG43

\*\*entire rectum overridden\*\*

left colpostat sagittal

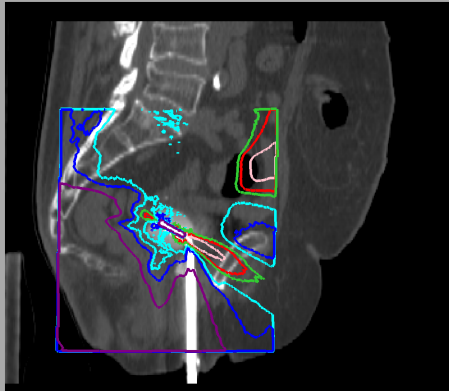

right colpostat sagittal

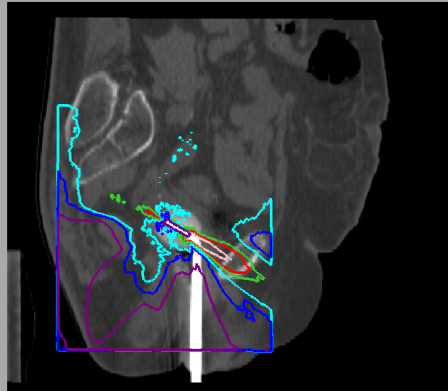

tandem sagittal

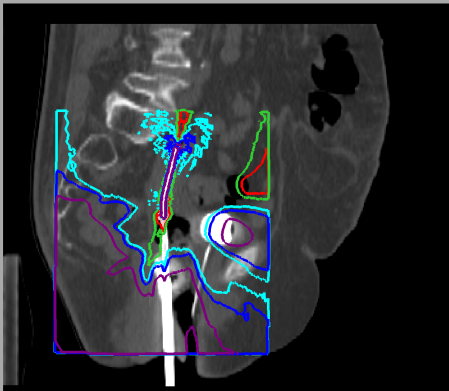

colpostats transverse

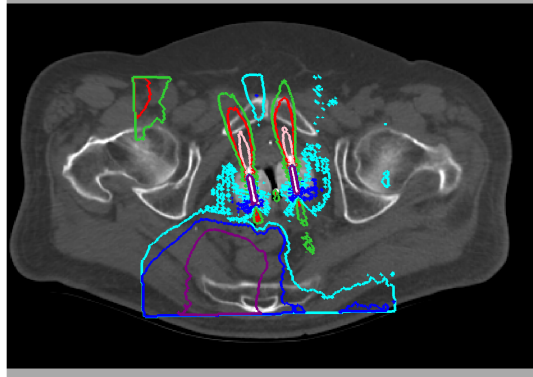

%diff from TG43



phantom least similar to TG43

-->D(Y,N,B,B)<--

D(Y,N,B,N)

D(Y,N,B,M)

D(N,N,N,N)

D(Y,N,N,N)

D(Y,N,M,M)

D(Y,M,X,X)

D(N,M,X,X)

phantom most similar to TG43

GBBS(solid model applicator, body, balloon and rectal contrast, packing contrast)

Patient\_25 D(Y,N,B,N) %difference from TG43

\*\*entire rectum overridden\*\*

left colpostat sagittal

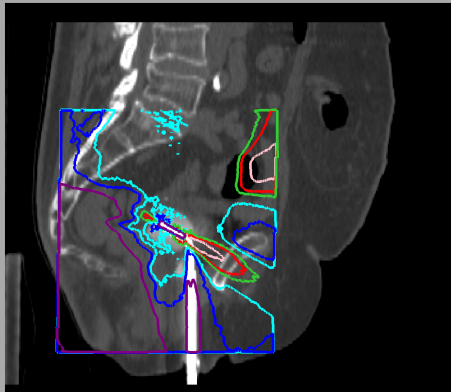

right colpostat sagittal

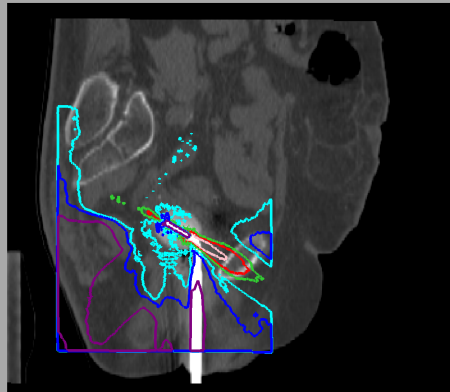

tandem sagittal

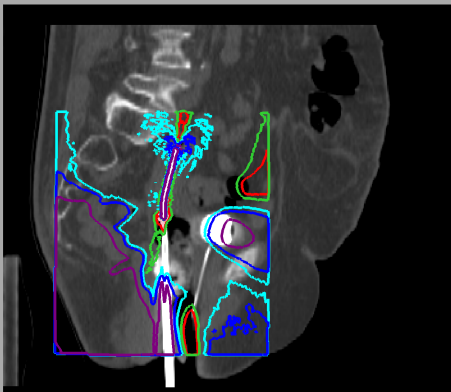

colpostats transverse

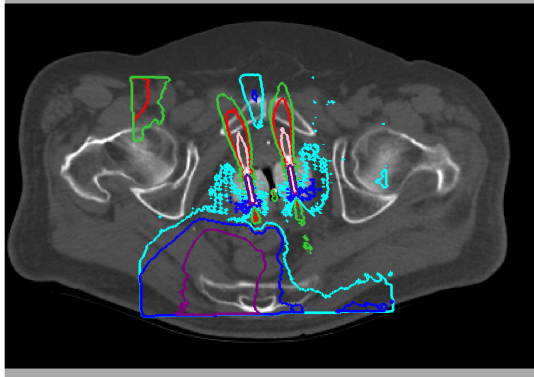

%diff from TG43



phantom least similar to TG43

D(Y,N,B,B)

-->D(Y,N,B,N)<--

D(Y,N,B,M)

D(N,N,N,N)

D(Y,N,N,N)

D(Y,N,M,M)

D(Y,M,X,X)

D(N,M,X,X)

phantom most similar to TG43

GBBS(solid model applicator, body, balloon and rectal contrast, packing contrast)

Patient\_25 D(Y,N,B,M) %difference from TG43

\*\*entire rectum overridden\*\*

left colpostat sagittal

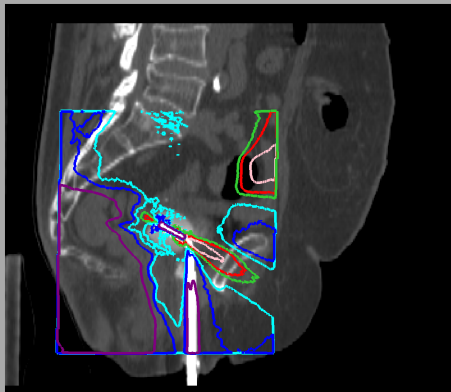

right colpostat sagittal

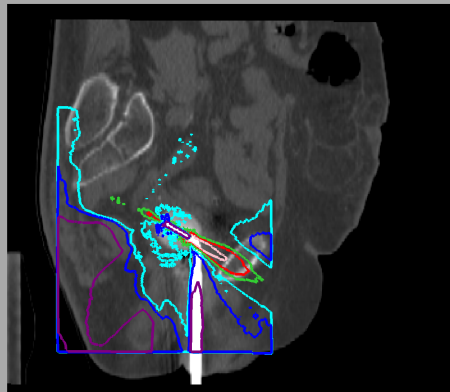

tandem sagittal

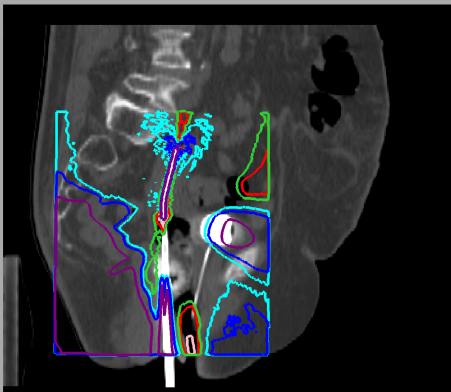

colpostats transverse

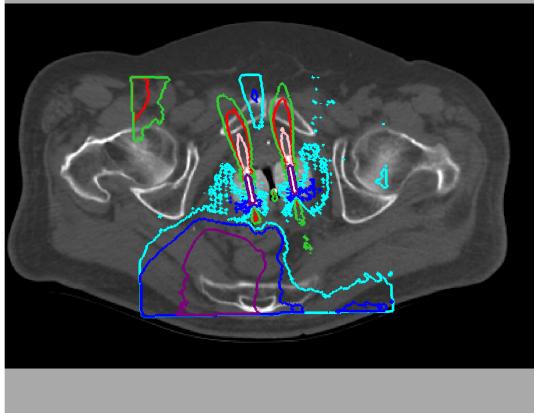

phantom least similar to TG43

D(Y,N,B,B)

D(Y,N,B,N)

-->D(Y,N,B,M)<--

D(N,N,N,N)

D(Y,N,N,N)

D(Y,N,M,M)

D(Y,M,X,X)

D(N,M,X,X)

phantom most similar to TG43

GBBS(solid model applicator, body, balloon and rectal contrast, packing contrast)

Patient\_25 D(N,N,N,N) %difference from TG43

\*\*entire rectum overridden\*\*

left colpostat sagittal

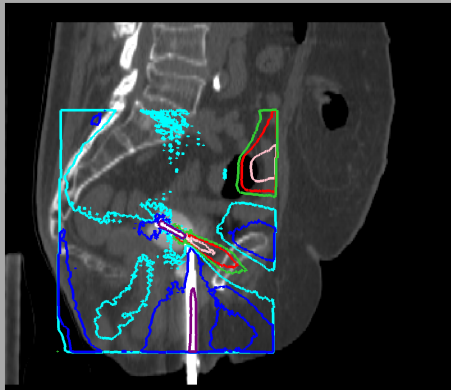

right colpostat sagittal

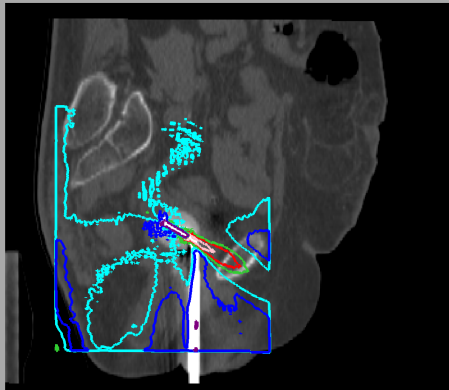

tandem sagittal

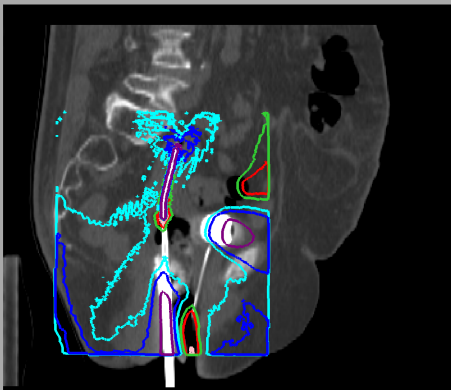

colpostats transverse

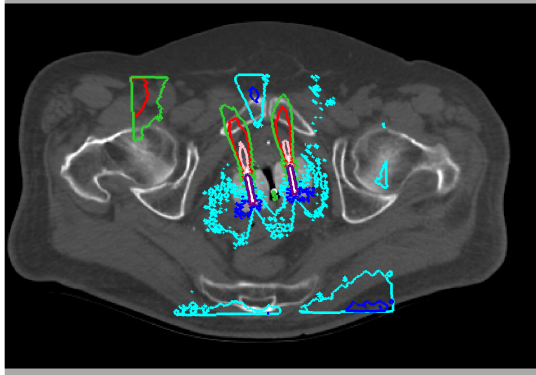

%diff from TG43



phantom least similar to TG43

D(Y,N,B,B)

D(Y,N,B,N)

D(Y,N,B,M)

-->D(N,N,N,N)<--

D(Y,N,N,N)

D(Y,N,M,M)

D(Y,M,X,X)

D(N,M,X,X)

phantom most similar to TG43

GBBS(solid model applicator, body, balloon and rectal contrast, packing contrast)

Patient\_25 D(Y,N,N,N) %difference from TG43

\*\*entire rectum overridden\*\*

left colpostat sagittal

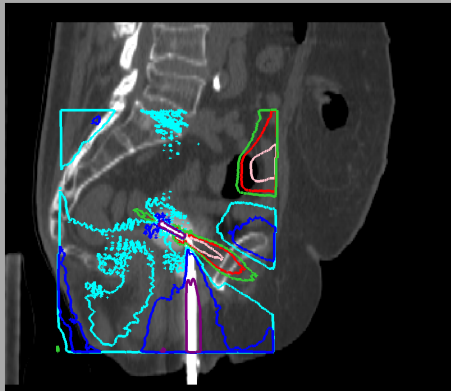

right colpostat sagittal

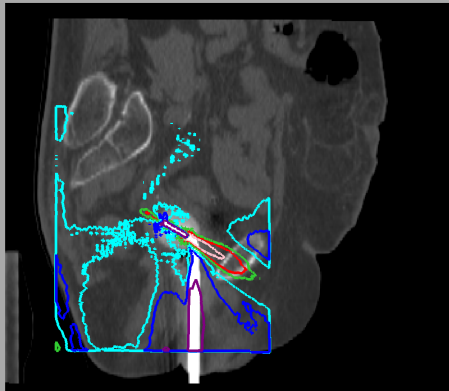

tandem sagittal

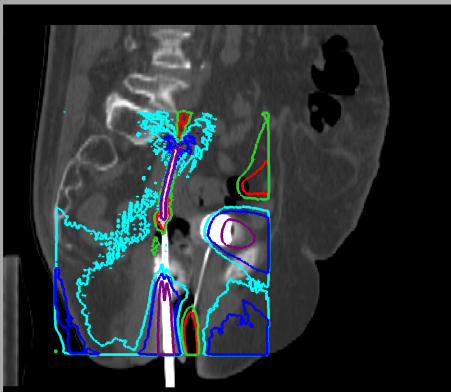

colpostats transverse

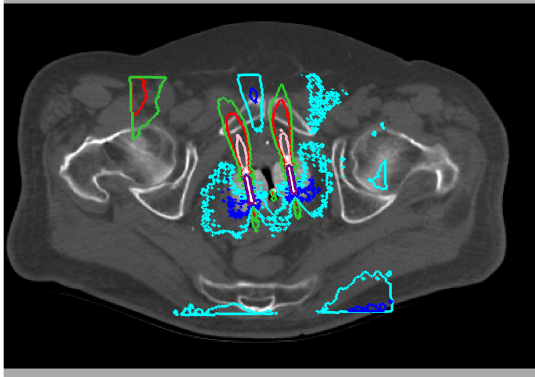

%diff from TG43



phantom least similar to TG43

D(Y,N,B,B)

D(Y,N,B,N)

D(Y,N,B,M)

D(N,N,N,N)

-->D(Y,N,N,N)<--

D(Y,N,M,M)

D(Y,M,X,X)

D(N,M,X,X)

phantom most similar to TG43

GBBS(solid model applicator, body, balloon and rectal contrast, packing contrast)

Patient\_25 D(Y,N,M,M) %difference from TG43

\*\*entire rectum overridden\*\*

left colpostat sagittal

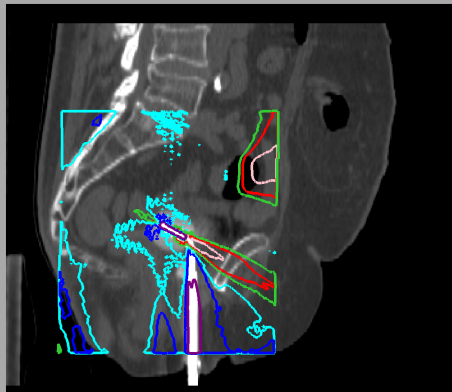

right colpostat sagittal

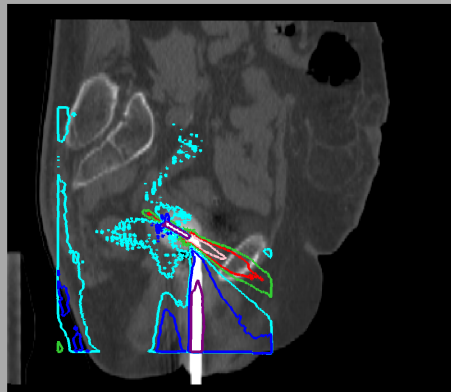

tandem sagittal

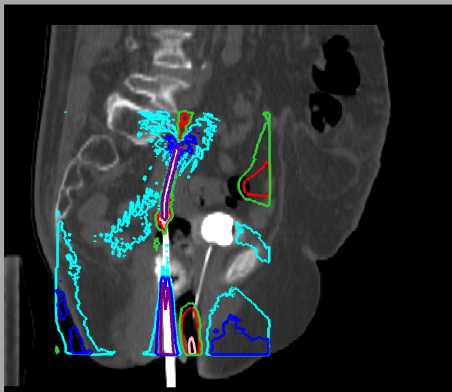

colpostats transverse

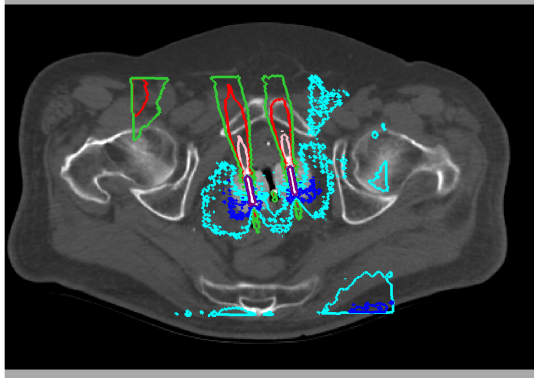

%diff from TG43



phantom least similar to TG43

D(Y,N,B,B)

D(Y,N,B,N)

D(Y,N,B,M)

D(N,N,N,N)

D(Y,N,N,N)

-->D(Y,N,M,M)<--

D(Y,M,X,X)

D(N,M,X,X)

phantom most similar to TG43

GBBS(solid model applicator, body, balloon and rectal contrast, packing contrast)

Patient\_25 D(Y,M,X,X) %difference from TG43

\*\*entire rectum overridden\*\*

left colpostat sagittal

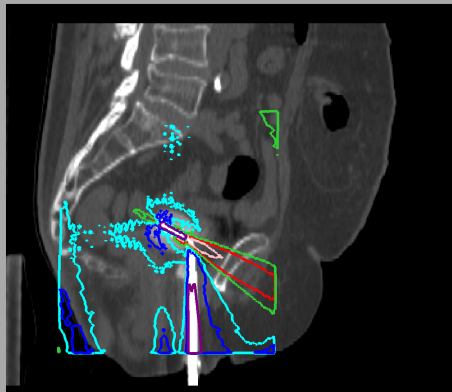

right colpostat sagittal

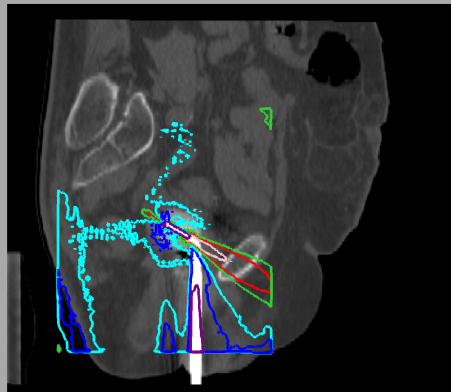

tandem sagittal

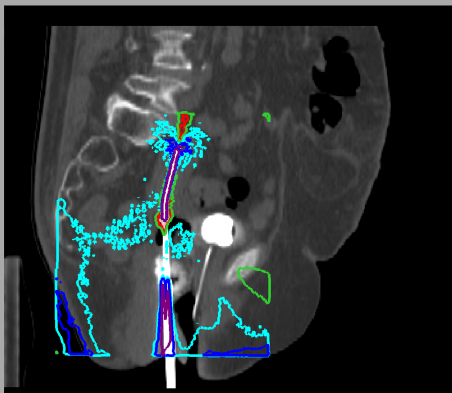

colpostats transverse

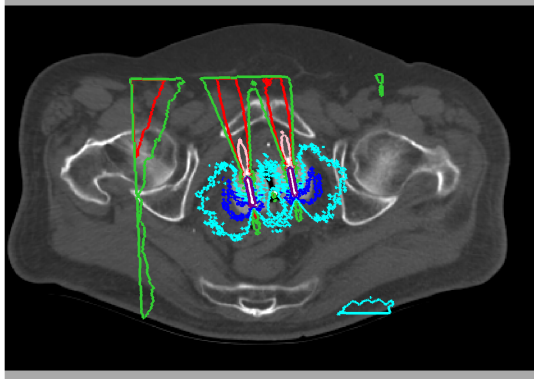

phantom least similar to TG43

D(Y,N,B,B)

D(Y,N,B,N)

D(Y,N,B,M)

D(N,N,N,N)

D(Y,N,N,N)

D(Y,N,M,M)

-->D(Y,M,X,X)<--

D(N,M,X,X)

phantom most similar to TG43

GBBS(solid model applicator, body, balloon and rectal contrast, packing contrast)



Patient\_25 D(N,M,X,X) %difference from TG43

\*\*entire rectum overridden\*\*

left colpostat sagittal

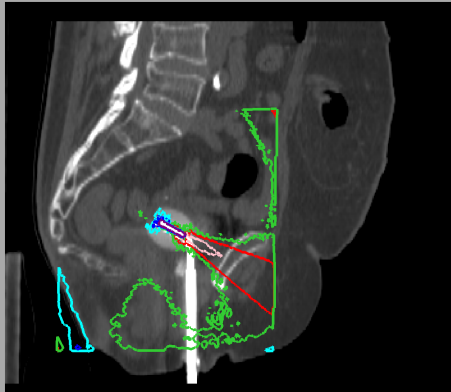

right colpostat sagittal

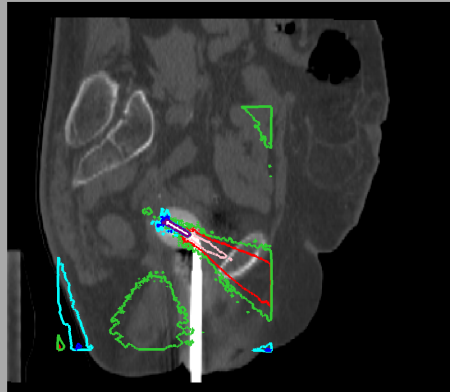

tandem sagittal

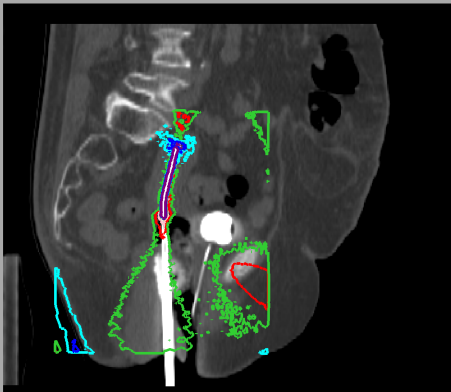

colpostats transverse

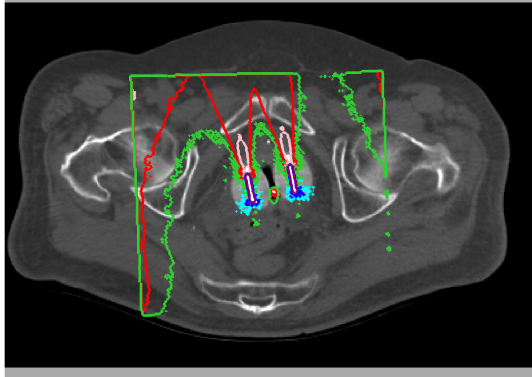

phantom least similar to TG43

D(Y,N,B,B)

D(Y,N,B,N)

D(Y,N,B,M)

D(N,N,N,N)

D(Y,N,N,N)

D(Y,N,M,M)

D(Y,M,X,X)

-->D(N,M,X,X)<--

phantom most similar to TG43

GBBS(solid model applicator, body, balloon and rectal contrast, packing contrast)

Patient\_26 D(Y,N,B,B) %difference from TG43

left colpostat sagittal

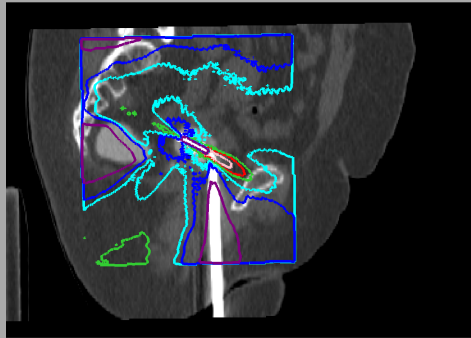

right colpostat sagittal

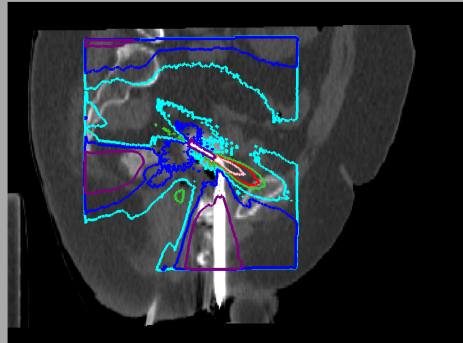

tandem sagittal

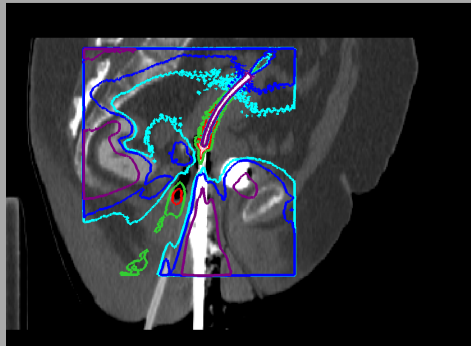

colpostats transverse

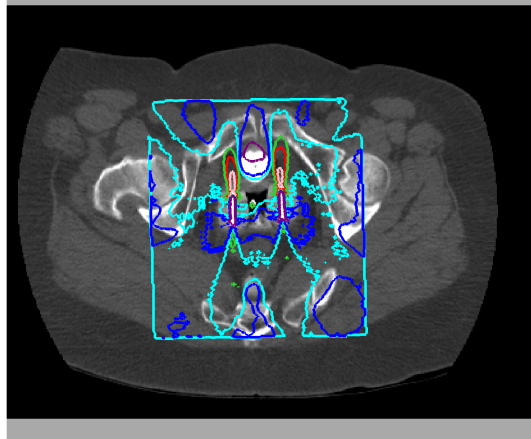

%diff from TG43

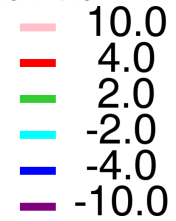

phantom least similar to TG43

-->D(Y,N,B,B)<--

D(Y,N,B,N)

D(Y,N,B,M)

D(N,N,N,N)

D(Y,N,N,N)

D(Y,N,M,M)

D(Y,M,X,X)

D(N,M,X,X)

phantom most similar to TG43

GBBS(solid model applicator, body, balloon and rectal contrast, packing contrast)

Patient\_26 D(Y,N,B,N) %difference from TG43

left colpostat sagittal

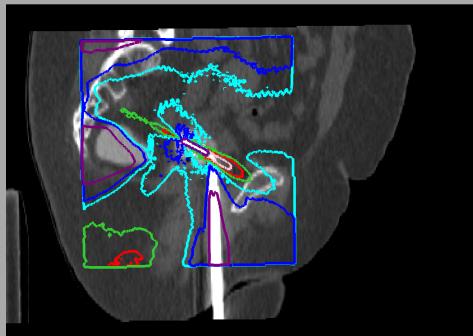

right colpostat sagittal

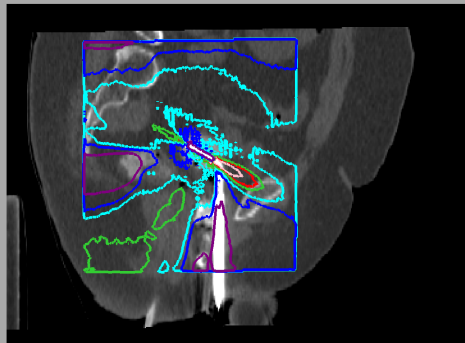

tandem sagittal

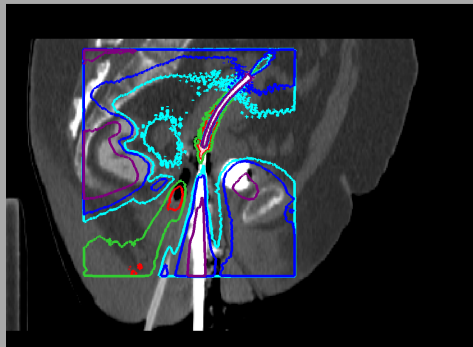

colpostats transverse

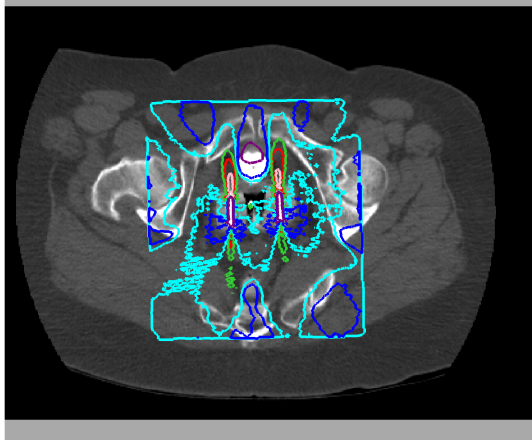

%diff from TG43



phantom least similar to TG43

D(Y,N,B,B)

-->D(Y,N,B,N)<--

D(Y,N,B,M)

D(N,N,N,N)

D(Y,N,N,N)

D(Y,N,M,M)

D(Y,M,X,X)

D(N,M,X,X)

phantom most similar to TG43

GBBS(solid model applicator, body, balloon and rectal contrast, packing contrast)

Patient\_26 D(Y,N,B,M) %difference from TG43

left colpostat sagittal

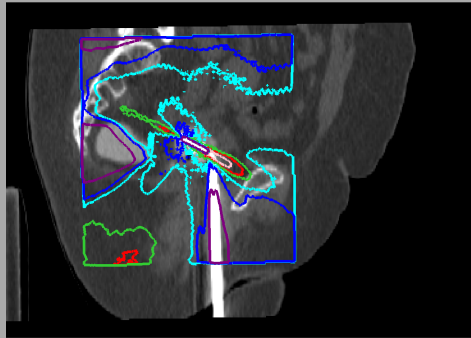

right colpostat sagittal

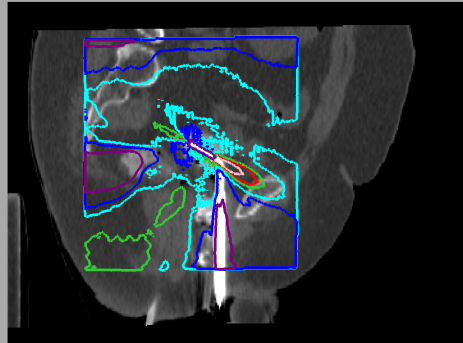

tandem sagittal

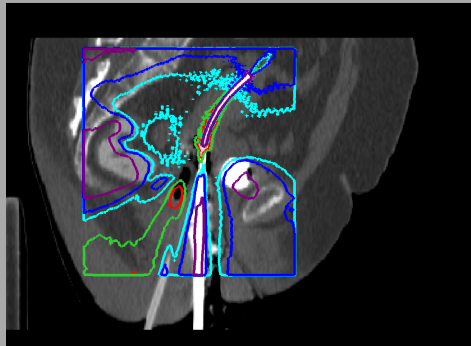

colpostats transverse

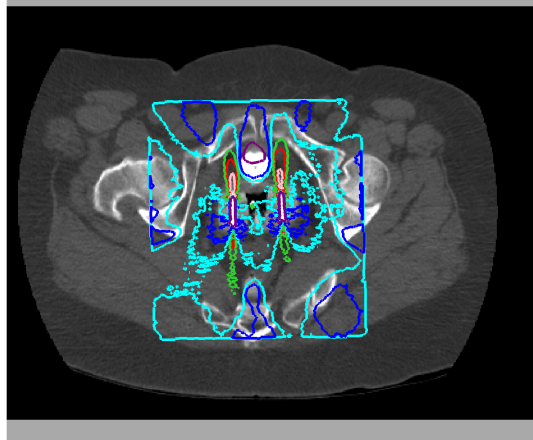

%diff from TG43



phantom least similar to TG43

D(Y,N,B,B)

D(Y,N,B,N)

-->D(Y,N,B,M)<--

D(N,N,N,N)

D(Y,N,N,N)

D(Y,N,M,M)

D(Y,M,X,X)

D(N,M,X,X)

phantom most similar to TG43

GBBS(solid model applicator, body, balloon and rectal contrast, packing contrast)

Patient\_26 D(N,N,N,N) %difference from TG43

left colpostat sagittal

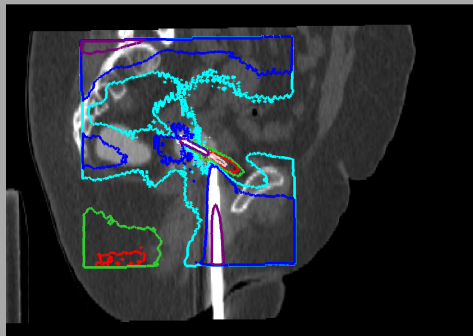

right colpostat sagittal

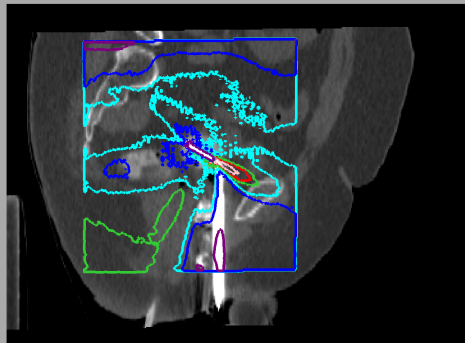

tandem sagittal

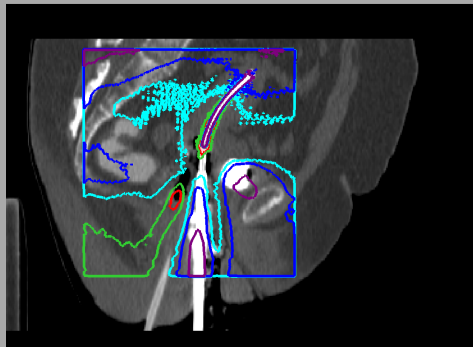

colpostats transverse

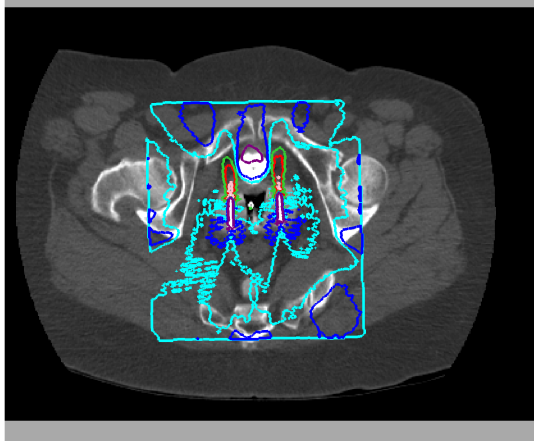

%diff from TG43



phantom least similar to TG43

D(Y,N,B,B)

D(Y,N,B,N)

D(Y,N,B,M)

-->D(N,N,N,N)<--

D(Y,N,N,N)

D(Y,N,M,M)

D(Y,M,X,X)

D(N,M,X,X)

phantom most similar to TG43

GBBS(solid model applicator, body, balloon and rectal contrast, packing contrast)

Patient\_26 D(Y,N,N,N) %difference from TG43

left colpostat sagittal

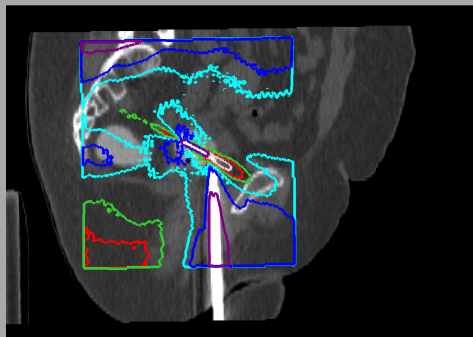

right colpostat sagittal

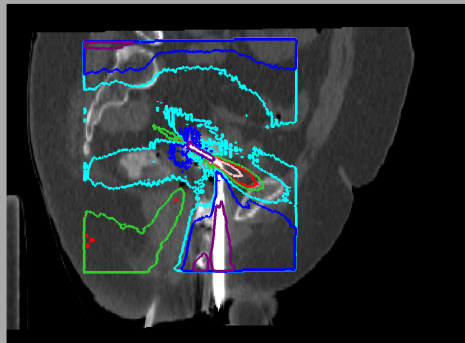

tandem sagittal

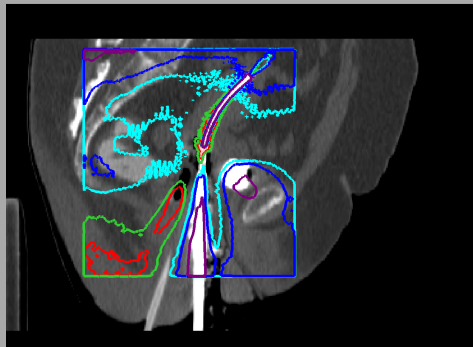

colpostats transverse

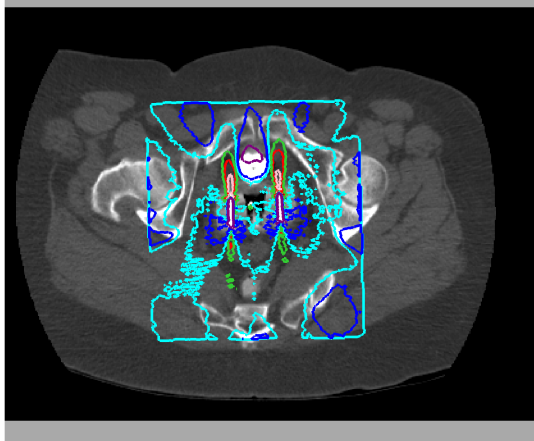

%diff from TG43



phantom least similar to TG43

D(Y,N,B,B)

D(Y,N,B,N)

D(Y,N,B,M)

D(N,N,N,N)

-->D(Y,N,N,N)<--

D(Y,N,M,M)

D(Y,M,X,X)

D(N,M,X,X)

phantom most similar to TG43

GBBS(solid model applicator, body, balloon and rectal contrast, packing contrast)

Patient\_26 D(Y,N,M,M) %difference from TG43

left colpostat sagittal

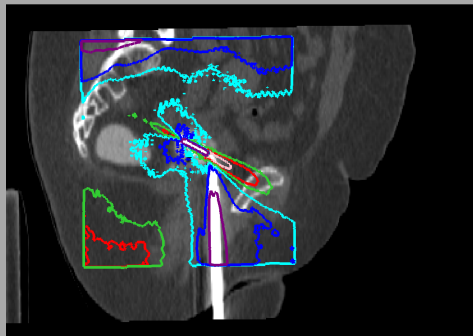

right colpostat sagittal

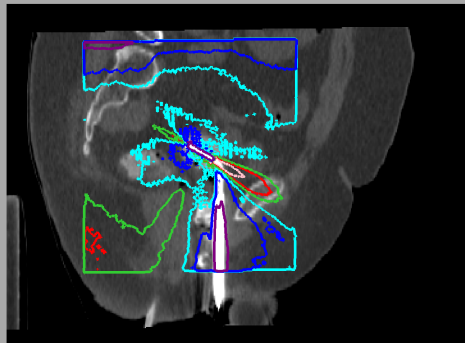

tandem sagittal

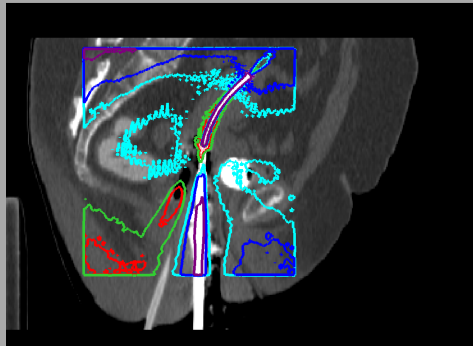

colpostats transverse

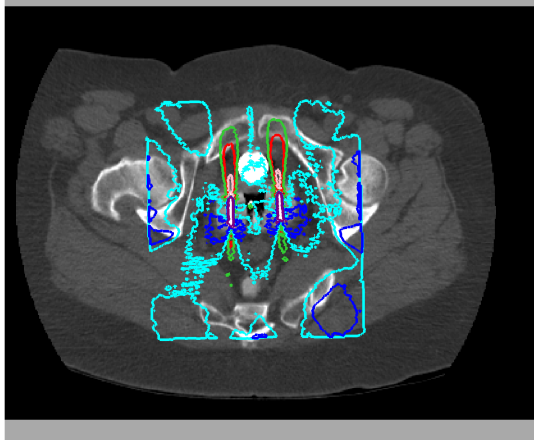

%diff from TG43



phantom least similar to TG43

D(Y,N,B,B)

D(Y,N,B,N)

D(Y,N,B,M)

D(N,N,N,N)

D(Y,N,N,N)

-->D(Y,N,M,M)<--

D(Y,M,X,X)

D(N,M,X,X)

phantom most similar to TG43

GBBS(solid model applicator, body, balloon and rectal contrast, packing contrast)

Patient\_26 D(Y,M,X,X) %difference from TG43

left colpostat sagittal

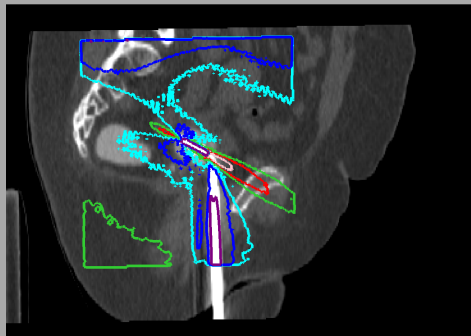

right colpostat sagittal

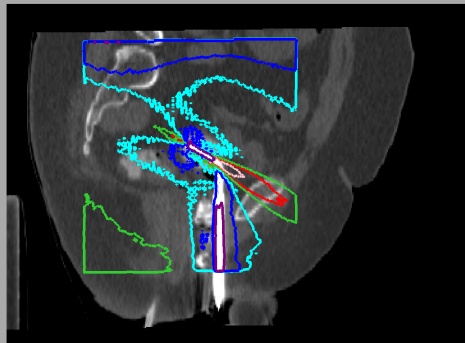

tandem sagittal

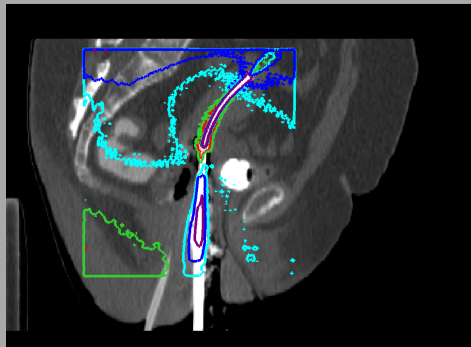

colpostats transverse

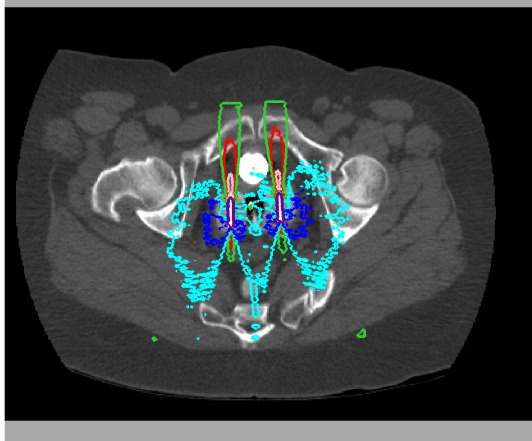

%diff from TG43



phantom least similar to TG43

D(Y,N,B,B)

D(Y,N,B,N)

D(Y,N,B,M)

D(N,N,N,N)

D(Y,N,N,N)

D(Y,N,M,M)

-->D(Y,M,X,X)<--

D(N,M,X,X)

phantom most similar to TG43

GBBS(solid model applicator, body, balloon and rectal contrast, packing contrast)



Patient\_26 D(N,M,X,X) %difference from TG43

left colpostat sagittal

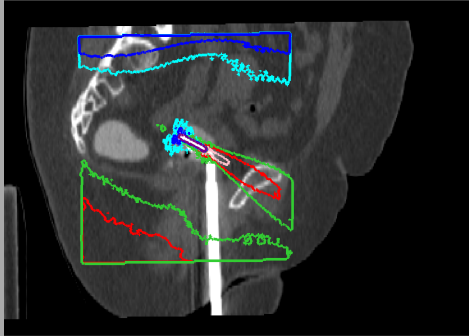

right colpostat sagittal

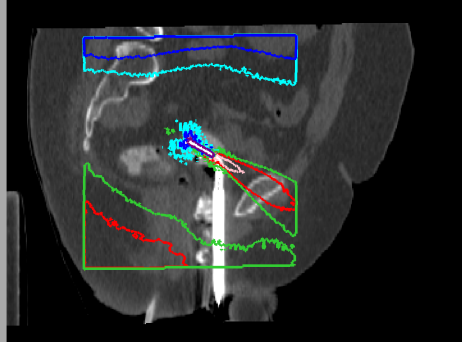

tandem sagittal

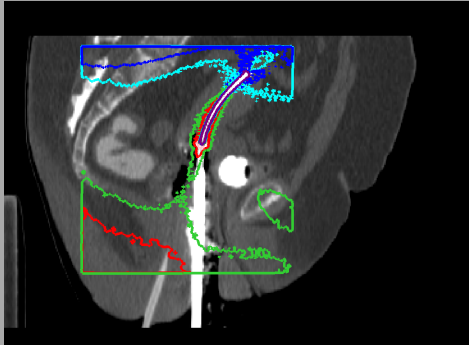

colpostats transverse

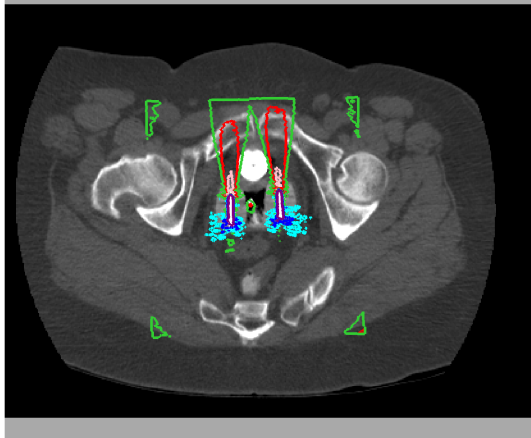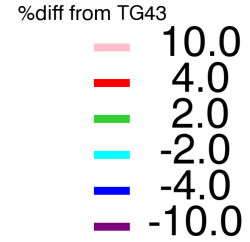

phantom least similar to TG43

D(Y,N,B,B)

D(Y,N,B,N)

D(Y,N,B,M)

D(N,N,N,N)

D(Y,N,N,N)

D(Y,N,M,M)

D(Y,M,X,X)

-->D(N,M,X,X)<--

phantom most similar to TG43

GBBS(solid model applicator, body, balloon and rectal contrast, packing contrast)
